# Supplementary material for: Little skate genome provides insights into genetic programs essential for limb-based locomotion
Source: eLife. 2022 Oct 26;11:e78345. doi: 10.7554/eLife.78345 (PMC9605692; doi:10.7554/eLife.78345)
Supplement: Supplementary file 1. — Ortholog genes defined by the OrthoVenn2. [file elife-78345-supp1.xlsx]

## Sheet: Ortholog Genes
Cluster	Mouse Gene	Skate Gene	Chicken Gene
1	Bend5	bend5	BEND5
2	Bloc1s5	bloc1s5	BLOC1S5
3	Chuk	chuk	CHUK
4	Engase	engase	ENGASE
5	Mycbpap	mycbpap	MYCBPAP
6	Necab2	necab2	NECAB2
7	Pelo	pelo	PELO
8	Rpl37a	rpl37a	RPL37A
9	Smg6	smg6	SMG6
10	Taf1b	taf1b	TAF1B
11	A1cf	a1cf	A1CF
12	Aacs	aacs	AACS
13	Aadac	aadac	AADAC
14	Aadat	aadat	AADAT
15	Aagab	aagab	AAGAB
16	Aak1	aak1	AAK1
17	Aamdc	aamdc	AAMDC
18	Aamp	aamp	AAMP
19	Aanat	aanat	AANAT
20	Aar2	aar2	AAR2
21	Aars	aars1	AARS
22	Aars2	aars2	AARS2
23	Aasdh	aasdh	AASDH
24	Aasdhppt	aasdhppt	AASDHPPT
25	Aass	aass	AASS
26	Aatf	aatf	AATF
27	Aatk	aatk	AATK
28	Abat	abat	ABAT
29	Abcb10	abcb10	ABCB10
30	Abcb6	abcb6	ABCB6
31	Abcb7	abcb7	ABCB7
32	Abcb8	abcb8	ABCB8
33	Abcc4	abcc4	ABCC4
34	Abcd2	abcd2	ABCD2
35	Abcd3	abcd3	ABCD3
36	Abcd4	abcd4	ABCD4
37	Abce1	abce1	ABCE1
38	Abcf2	LOC116972173	ABCF2
39	Abcf3	abcf3	ABCF3
40	Abcg1	LOC116980296	ABCG1
41	Abcg2	abcg2	ABCG2
42	Abcg4	abcg4	ABCG4
43	Abcg5	abcg5	ABCG5
44	Abcg8	abcg8	ABCG8
45	Abhd10	abhd10	ABHD10
46	Abhd11	abhd11	ABHD11
47	Abhd12	abhd12	ABHD12
48	Abhd13	abhd13	ABHD13
49	Abhd14b	abhd14b	ABHD14B
50	Abhd17b	abhd17b	ABHD17B
51	Abhd17c	abhd17c	ABHD17C
52	Abhd18	abhd18	ABHD18
53	Abhd2	abhd2	ABHD2
54	Abhd3	abhd3	ABHD3
55	Abhd5	abhd5	ABHD4
56	Abhd6	abhd6	ABHD6
57	Abhd8	abhd8	ABHD8
58	Abi1	abi1	ABI1
59	Abi2	abi2	ABI2
60	Abl1	abl1	ABL1
61	Abl2	abl2	ABL2
62	Ablim1	ablim1	ABLIM1
63	Ablim2	ablim2	ABLIM2
64	Ablim3	ablim3	ABLIM3
65	Abra	abra	ABRA
66	Abracl	abracl	ABRACL
67	Abtb1	abtb1	ABTB1
68	Acaa2	acaa2	ACAA2
69	Acad8	acad8	ACAD8
70	Acad9	acad9	ACAD9
71	Acadl	acadl	ACADL
72	Acads	acads	ACADS
73	Acadsb	acadsb	ACADSB
74	Acan	acan	ACAN
75	Acap2	acap2	ACAP2
76	Acat1	acat1	ACAT1
77	Acbd3	acbd3	ACBD3
78	Acbd5	acbd5	ACBD5
79	Ace	ace	ACE
80	Ace2	ace2	ACE2
81	Acer1	acer1	ACER1
82	Acer2	acer2	ACER2
83	Acer3	acer3	ACER3
84	Ache	ache	ACHE
85	Ackr2	ackr2	ACKR2
86	Ackr4	ackr4	ACKR4
87	Acly	acly	ACLY
88	Acmsd	acmsd	ACMSD
89	Aco2	aco2	ACO2
90	Acot11	acot11	ACOT11
91	Acot13	acot13	ACOT13
92	Acot7	acot7	ACOT7
93	Acox1	acox1	ACOX1
94	Acox2	acox2	ACOX2
95	Acp1	acp1	ACP1
96	Acp5	acp5	ACP5
97	Acsbg2	acsbg2	ACSBG2
98	Acsf2	acsf2	ACSF2
99	Acsl3	acsl3	ACSL3
100	Acsl4	LOC116978865	ACSL4
101	Acsl5	acsl5	ACSL5
102	Acsm3	acsm3	ACSM3
103	Acss1	acss1	ACSS1
104	Acss2	LOC116986135	ACSS2
105	Acss3	acss3	ACSS3
106	Acta2	acta2	ACTA2
107	Actb	actb	ACTB
108	Actc1	actc1	ACTC1
109	Actl6a	actl6a	ACTL6A
110	Actr10	actr10	ACTR10
111	Actr1a	actr1a	ACTR1A
112	Actr2	actr2	ACTR2
113	Actr5	actr5	ACTR5
114	Actr6	actr6	ACTR6
115	Actr8	actr8	ACTR8
116	Acvr1	acvr1	ACVR1
117	Acvr2a	acvr2a	ACVR2A
118	Acvr2b	acvr2b	ACVR2B
119	Acyp1	acyp1	ACYP1
120	Acyp2	acyp2	ACYP2
121	Ada	ada	ADA
122	Adal	adal	ADAL
123	Adam10	adam10	ADAM10
124	Adam11	adam11	ADAM11
125	Adam12	adam12	ADAM12
126	Adam17	adam17	ADAM17
127	Adam19	adam19	ADAM19
128	Adam22	adam22	ADAM22
129	Adam23	adam23	ADAM23
130	Adam8	adam8	ADAM8
131	Adamts1	adamts1	ADAMTS1
132	Adamts15	LOC116991342	ADAMTS15
133	Adamts5	adamts5	ADAMTS5
134	Adamtsl2	adamtsl2	ADAMTSL2
135	Adamtsl5	adamtsl5	ADAMTSL5
136	Adarb1	adarb1	ADARB1
137	Adarb2	adarb2	ADARB2
138	Adat1	adat1	ADAT1
139	Adck1	adck1	ADCK1
140	Adck2	adck2	ADCK2
141	Adcy1	adcy1	ADCY1
142	Adcy8	adcy8	ADCY8
143	Adcy9	adcy9	ADCY9
144	Adcyap1	adcyap1	ADCYAP1
145	Adcyap1r1	LOC116987285	ADCYAP1R1
146	Add1	add1	ADD1
147	Add2	add2	ADD2
148	Add3	add3	ADD3
149	Adgrf5	LOC116973330	ADGRF5
150	Adgrg2	adgrg2	ADGRG2
151	Adgrg6	adgrg6	ADGRG6
152	Adgrl4	adgrl4	ADGRL4
153	Adh5	LOC116974361	ADH4
154	Adipoq	LOC116979516	ADIPOQ
155	Adipor1	adipor1	ADIPOR1
156	Adipor2	adipor2	ADIPOR2
157	Adk	adk	ADK
158	Adnp	adnp	ADNP
159	Adora1	adora1	ADORA1
160	Adora2a	adora2a	ADORA2A
161	Adora2b	adora2b	ADORA2B
162	Adpgk	adpgk	ADPGK
163	Adprhl2	adprs	ADPRHL2
164	Adprm	adprm	ADPRM
165	Adra1a	adra1a	ADRA1A
166	Adra1b	adra1b	ADRA1B
167	Adra1d	adra1d	ADRA1D
168	Adra2a	adra2a	ADRA2A
169	Adra2c	adra2c	ADRA2C
170	Adsl	adsl	ADSL
171	Adss	adss2	ADSS
172	Adssl1	adss1	ADSS1
173	Aebp1	LOC116967400	AEBP1
174	Aebp2	aebp2	AEBP2
175	Afap1	afap1	AFAP1
176	Afap1l2	afap1l2	AFAP1L2
177	Afdn	afdn	AFDN
178	Aff1	aff1	AFF1
179	Aff2	aff2	AFF2
180	Aff4	aff4	AFF4
181	Afg1l	afg1l	AFG1L
182	Afmid	afmid	AFMID
183	Aftph	aftph	AFTPH
184	Agbl5	agbl5	AGBL5
185	Agfg1	agfg1	AGFG1
186	Agk	agk	AGK
187	Agl	agl	AGL
188	Agmat	agmat	AGMAT
189	Agmo	agmo	AGMO
190	Agpat4	agpat4	AGPAT4
191	Agpat5	agpat5	AGPAT5
192	Agps	agps	AGPS
193	Agr3	LOC116984152	AGR3
194	Agrn	agrn	AGRN
195	Agrp	agrp	AGRP
196	Agtpbp1	agtpbp1	AGTPBP1
197	Agtr2	LOC116979244	AGTR2
198	Agtrap	agtrap	AGTRAP
199	Agxt	agxt	AGXT
200	Ahctf1	ahctf1	AHCTF1
201	Ahcyl2	ahcyl2	AHCYL2
202	Ahdc1	ahdc1	AHDC1
203	Ahr	ahr	AHR
204	Ahsa1	ahsa1	AHSA1
205	Ahsg	LOC116980004	AHSG
206	Aicda	LOC116968058	AICDA
207	Aida	aida	AIDA
208	Aif1l	aif1l	AIF1L
209	Aifm1	aifm1	AIFM1
210	Aifm2	LOC116966398	AIFM2
211	Aifm3	aifm3	AIFM3
212	Aig1	aig1	AIG1
213	Aimp1	aimp1	AIMP1
214	Aimp2	aimp2	AIMP2
215	Ajap1	ajap1	AJAP1
216	Ak1	ak1	AK1
217	Ak2	ak2	AK2
218	Ak3	ak3	AK3
219	Ak4	ak4	AK4
220	Ak5	LOC116991949	AK5
221	Ak6	ak6	AK6
222	Ak7	ak7	AK7
223	Akap1	akap1	AKAP1
224	Akap10	akap10	AKAP10
225	Akap11	akap11	AKAP11
226	Akap12	akap12	AKAP12
227	Akap14	akap14	AKAP14
228	Akap17b	akap17a	AKAP17A
229	Akap6	akap6	AKAP6
230	Akap7	akap7	AKAP7
231	Akap9	akap9	AKAP9
232	Akirin2	akirin2	AKIRIN2
233	Akr1a1	akr1a1	AKR1A1
234	Akr1d1	LOC116983884	AKR1D1
235	Akt3	akt3	AKT3
236	Aktip	aktip	AKTIP
237	Alad	alad	ALAD
238	Alas1	alas1	ALAS1
239	Alcam	alcam	ALCAM
240	Aldh1a2	aldh1a2	ALDH1A2
241	Aldh1a3	aldh1a3	ALDH1A3
242	Aldh5a1	aldh5a1	ALDH5A1
243	Aldh6a1	aldh6a1	ALDH6A1
244	Aldh7a1	aldh7a1	ALDH7A1
245	Aldh8a1	aldh8a1	ALDH8A1
246	Aldh9a1	aldh9a1	ALDH9A1
247	Aldoc	aldoc	ALDOC
248	Alg10b	LOC116985135	ALG10
249	Alg11	alg11	ALG11
250	Alg12	alg12	ALG12
251	Alg14	alg14	ALG14
252	Alg2	alg2	ALG2
253	Alg3	alg3	ALG3
254	Alg5	alg5	ALG5
255	Alg6	alg6	ALG6
256	Alg8	alg8	ALG8
257	Alk	alk	ALK
258	Alkal2	alkal2	ALKAL2
259	Alkbh1	alkbh1	ALKBH1
260	Alkbh3	alkbh3	ALKBH3
261	Alkbh4	alkbh4	ALKBH4
262	Alkbh5	alkbh5	ALKBH5
263	Alkbh8	alkbh8	ALKBH8
264	Alox5	alox5	ALOX5
265	Alox5ap	alox5ap	ALOX5AP
266	Alpk1	alpk1	ALPK1
267	Alpk2	alpk2	ALPK2
268	Alpk3	alpk3	ALPK3
269	Alpl	alpl	ALPL
270	Als2	als2	ALS2
271	Alx1	alx1	ALX1
272	Alx3	alx3	ALX3
273	Alx4	alx4	ALX4
274	Amacr	amacr	AMACR
275	Ambp	LOC116990830	AMBP
276	Ambra1	ambra1	AMBRA1
277	Amdhd1	amdhd1	AMDHD1
278	Amer1	amer1	AMER1
279	Amer2	amer2	AMER2
280	Amer3	amer3	AMER3
281	Amfr	amfr	AMFR
282	Amigo1	amigo1	AMIGO1
283	Amigo2	amigo2	AMIGO2
284	Amigo3	amigo3	AMIGO3
285	Amn	amn	AMN
286	Amn1	amn1	AMN1
287	Amot	LOC116979220	AMOT
288	Amotl1	amotl1	AMOTL1
289	Amotl2	amotl2	AMOTL2
290	Ampd1	ampd1	AMPD1
291	Ampd2	ampd2	AMPD2
292	Ampd3	ampd3	AMPD3
293	Amph	amph	AMPH
294	Anapc1	anapc1	ANAPC1
295	Anapc10	anapc10	ANAPC10
296	Anapc13	anapc13	ANAPC13
297	Anapc16	anapc16	ANAPC16
298	Anapc2	anapc2	ANAPC2
299	Anapc4	anapc4	ANAPC4
300	Anapc5	anapc5	ANAPC5
301	Anapc7	anapc7	ANAPC7
302	Angel1	angel1	ANGEL1
303	Angel2	angel2	ANGEL2
304	Angpt1	angpt1	ANGPT1
305	Angpt2	angpt2	ANGPT2
306	Angptl1	angptl1	ANGPTL1
307	Angptl2	angptl2	ANGPTL2
308	Angptl4	angptl4	ANGPTL4
309	Angptl7	angptl7	ANGPTL7
310	Ank1	ank1	ANK1
311	Ankef1	ankef1	ANKEF1
312	Ankfy1	ankfy1	ANKFY1
313	Ank	ankh	ANKH
314	Ankib1	ankib1	ANKIB1
315	Ankk1	ankk1	ANKK1
316	Ankle1	ankle1	ANKLE1
317	Ankle2	ankle2	ANKLE2
318	Ankmy2	ankmy2	ANKMY2
319	Ankra2	ankra2	ANKRA2
320	Ankrd1	ankrd1	ANKRD1
321	Ankrd10	ankrd10	ANKRD10
322	Ankrd11	ankrd11	ANKRD11
323	Ankrd13a	ankrd13a	ANKRD13A
324	Ankrd13b	ankrd13b	ANKRD13B
325	Ankrd16	ankrd16	ANKRD16
326	Ankrd2	ankrd2	ANKRD2
327	Ankrd22	ankrd22	ANKRD22
328	Ankrd24	ankrd24	ANKRD24
329	Ankrd26	LOC116984163	ANKRD26
330	Ankrd27	ankrd27	ANKRD27
331	Ankrd28	ankrd28	ANKRD28
332	Ankrd29	ankrd29	ANKRD29
333	Ankrd33b	ankrd33b	ANKRD33B
334	Ankrd34b	ankrd34b	ANKRD34B
335	Ankrd39	ankrd39	ANKRD39
336	Ankrd46	ankrd46	ANKRD46
337	Ankrd49	ankrd49	ANKRD49
338	Ankrd50	ankrd50	ANKRD50
339	Ankrd54	ankrd54	ANKRD54
340	Ankrd6	ankrd6	ANKRD6
341	Ankrd61	ankrd61	ANKRD61
342	Ankrd66	LOC116972847	ANKRD66
343	Anks1	anks1a	ANKS1A
344	Anks1b	anks1b	ANKS1B
345	Anks3	anks3	ANKS3
346	Anks6	anks6	ANKS6
347	Anln	anln	ANLN
348	Ano10	ano10	ANO10
349	Ano5	ano5	ANO5
350	Ano6	ano6	ANO6
351	Ano8	ano8	ANO8
352	Anpep	anpep	ANPEP
353	Antxr1	antxr1	ANTXR1
354	Antxr2	antxr2	ANTXR2
355	Anxa1	anxa1	ANXA1
356	Anxa10	anxa10	ANXA10
357	Anxa11	anxa11	ANXA11
358	Anxa5	anxa5	ANXA5
359	Anxa6	anxa6	ANXA6
360	Anxa7	anxa7	ANXA7
361	Aopep	aopep	AOPEP
362	Ap1ar	ap1ar	AP1AR
363	Ap1m1	ap1m1	AP1M1
364	Ap1s2	ap1s2	AP1S2
365	Ap1s3	ap1s3	AP1S3
366	Ap2m1	ap2m1	AP2M1
367	Ap2s1	ap2s1	AP2S1
368	Ap3m1	ap3m1	AP3M1
369	Ap3m2	LOC116967470	AP3M2
370	Ap3s1	ap3s1	AP3S1
371	Ap4e1	ap4e1	AP4E1
372	Ap4s1	ap4s1	AP4S1
373	Ap5m1	ap5m1	AP5M1
374	Ap5s1	ap5s1	AP5S1
375	Ap5z1	ap5z1	AP5Z1
376	Apaf1	apaf1	APAF1
377	Apba1	apba1	APBA1
378	Apba2	apba2	APBA2
379	Apbb1ip	apbb1ip	APBB1IP
380	Apbb3	apbb3	APBB3
381	Apcdd1	apcdd1	APCDD1
382	Apela	apela	APELA
383	Api5	api5	API5
384	Aplnr	aplnr	APLNR
385	Aplp2	aplp2	APLP2
386	Apmap	apmap	APMAP
387	Apob	apob	APOB
388	Apobec2	apobec2	APOBEC2
389	Apobec4	apobec4	APOBEC4
390	Apoo	apoo	APOO
391	Apool	apool	APOOL
392	App	app	APP
393	Appbp2	appbp2	APPBP2
394	Appl1	appl1	APPL1
395	Appl2	appl2	APPL2
396	Aprt	aprt	APRT
397	Aptx	aptx	APTX
398	Aqp1	aqp1	AQP1
399	Aqp11	aqp11	AQP11
400	Aqp12	LOC116979775	AQP12A
401	Aqp3	LOC116980076	AQP3
402	Aqp4	aqp4	AQP4
403	Aqp9	aqp9	AQP9
404	Aqr	aqr	AQR
405	Arap2	arap2	ARAP2
406	Arap3	LOC116978600	ARAP3
407	Arcn1	arcn1	ARCN1
408	Arel1	arel1	AREL1
409	Arf1	arf1	ARF1
410	Arf6	arf6	ARF6
411	Arfgap1	arfgap1	ARFGAP1
412	Arfgap3	arfgap3	ARFGAP3
413	Arfgef3	arfgef3	ARFGEF3
414	Arfip1	arfip1	ARFIP1
415	Arfrp1	arfrp1	ARFRP1
416	Arg2	arg2	ARG2
417	Arhgap1	arhgap1	ARHGAP1
418	Arhgap10	arhgap10	ARHGAP10
419	Arhgap11a	arhgap11a	ARHGAP11B
420	Arhgap12	arhgap12	ARHGAP12
421	Arhgap15	arhgap15	ARHGAP15
422	Arhgap17	arhgap17	ARHGAP17
423	Arhgap18	arhgap18	ARHGAP18
424	Arhgap19	arhgap19	ARHGAP19
425	Arhgap24	arhgap24	ARHGAP24
426	Arhgap25	arhgap25	ARHGAP25
427	Arhgap26	LOC116978300	ARHGAP26
428	Arhgap27	arhgap27	ARHGAP27
429	Arhgap28	arhgap28	ARHGAP28
430	Arhgap31	arhgap31	ARHGAP31
431	Arhgap39	arhgap39	ARHGAP39
432	Arhgap40	LOC116986130	ARHGAP40
433	Arhgap42	arhgap42	ARHGAP42
434	Arhgap44	arhgap44	ARHGAP44
435	Arhgap45	arhgap45	ARHGAP45
436	Arhgap6	arhgap6	ARHGAP6
437	Arhgap8	arhgap8	ARHGAP8
438	Arhgdia	arhgdia	ARHGDIA
439	Arhgdib	LOC116986014	ARHGDIB
440	Arhgef10	arhgef10	ARHGEF10
441	Arhgef10l	arhgef10l	ARHGEF10L
442	Arhgef12	arhgef12	ARHGEF12
443	Arhgef16	arhgef16	ARHGEF16
444	Arhgef17	arhgef17	ARHGEF17
445	Arhgef18	arhgef18	ARHGEF18
446	Arhgef26	arhgef26	ARHGEF26
447	Arhgef3	arhgef3	ARHGEF3
448	Arhgef33	arhgef33	ARHGEF33
449	Arhgef38	arhgef38	ARHGEF38
450	Arhgef39	arhgef39	ARHGEF39
451	Arhgef9	arhgef9	ARHGEF9
452	Arid3a	arid3a	ARID3A
453	Arid3b	arid3b	ARID3B
454	Arid4a	arid4a	ARID4A
455	Arid4b	arid4b	ARID4B
456	Arid5a	arid5a	ARID5A
457	Arid5b	arid5b	ARID5B
458	Arih1	arih1	ARIH1
459	Arih2	arih2	ARIH2
460	Arl1	arl1	ARL1
461	Arl13b	arl13b	ARL13B
462	Arl14	arl14	ARL14
463	Arl14ep	arl14ep	ARL14EP
464	Arl14epl	arl14epl	ARL14EPL
465	Arl15	arl15	ARL15
466	Arl16	arl16	ARL16
467	Arl3	arl3	ARL3
468	Arl4a	arl4a	ARL4A
469	Arl4c	arl4c	ARL4C
470	Arl6	arl6	ARL6
471	Arl6ip1	arl6ip1	ARL6IP1
472	Arl6ip4	arl6ip4	ARL6IP4
473	Arl6ip5	arl6ip5	ARL6IP5
474	Arl8a	arl8a	ARL8A
475	Arl9	arl9	ARL9
476	Armc1	armc1	ARMC1
477	Armc2	armc2	ARMC2
478	Armc3	armc3	ARMC3
479	Armc4	armc4	ARMC4
480	Armc6	armc6	ARMC6
481	Armc7	armc7	ARMC7
482	Armc8	LOC116974936	ARMC8
483	Armc9	armc9	ARMC9
484	Armh1	armh1	ARMH1
485	Armh3	armh3	ARMH3
486	Armt1	armt1	ARMT1
487	Arnt	LOC116968900	ARNT
488	Arnt2	arnt2	ARNT2
489	Arntl	arntl	ARNTL
490	Arpc1a	arpc1a	ARPC1A
491	Arpc1b	LOC116985971	ARPC1B
492	Arpc2	arpc2	ARPC2
493	Arpc3	arpc3	ARPC3
494	Arpc4	arpc4	ARPC4
495	Arpc5	arpc5	ARPC5
496	Arpp19	arpp19	ARPP19
497	Arrdc1	arrdc1	ARRDC1
498	Arrdc3	arrdc3	ARRDC3
499	Arsa	arsa	ARSA
500	Arsb	arsb	ARSB
501	Arsg	arsg	ARSG
502	Arsi	arsi	ARSI
503	Arsj	LOC116974722	ARSJ
504	Arsk	arsk	ARSK
505	Arv1	arv1	ARV1
506	Arvcf	arvcf	ARVCF
507	Arx	arx	ARX
508	As3mt	as3mt	AS3MT
509	Asah1	asah1	ASAH1
510	Asap1	asap1	ASAP1
511	Asap2	asap2	ASAP2
512	Asap3	LOC116988372	ASAP3
513	Asb1	asb1	ASB1
514	Asb10	LOC116971758	ASB10
515	Asb13	asb13	ASB13
516	Asb14	asb14	ASB14
517	Asb15	asb15	ASB15
518	Asb16	asb16	ASB16
519	Asb18	asb18	ASB18
520	Asb2	asb2	ASB2
521	Asb3	asb3	ASB3
522	Asb4	asb4	ASB4
523	Asb5	asb5	ASB5
524	Asb6	asb6	ASB6
525	Asb7	asb7	ASB7
526	Ascc1	ascc1	ASCC1
527	Ascc2	ascc2	ASCC2
528	Ascl1	LOC116984784	ASCL1
529	Ascl3	ascl3	ASCL3
530	Asf1a	asf1b	ASF1A
531	Ash1l	LOC116970243	ASH1L
532	Ash2l	ash2l	ASH2L
533	Asic1	LOC116972168	ASIC1
534	Asmt	asmt	ASMT
535	Asns	asns	ASNS
536	Aspa	aspa	ASPA
537	Aspg	aspg	ASPG
538	Asphd2	asphd2	ASPHD2
539	Aspm	aspm	ASPM
540	Aspn	aspn	ASPN
541	Aspscr1	aspscr1	ASPSCR1
542	Ass1	ass1	ASS1
543	Asxl1	LOC116986141	ASXL1
544	Asxl2	asxl2	ASXL2
545	Asxl3	asxl3	ASXL3
546	Asz1	asz1	ASZ1
547	Atad1	atad1	ATAD1
548	Atad2	atad2	ATAD2
549	Atad2b	atad2b	ATAD2B
550	Atad3a	atad3a	ATAD3A
551	Atad5	atad5	ATAD5
552	Atcay	atcay	ATCAY
553	Ate1	ate1	ATE1
554	Atf2	atf2	ATF2
555	Atf3	atf3	ATF3
556	Atf4	atf4	ATF4
557	Atf6	atf6	ATF6
558	Atf7ip	LOC116967094	ATF7IP
559	Atg10	atg10	ATG10
560	Atg101	atg101	ATG101
561	Atg12	atg12	ATG12
562	Atg13	atg13	ATG13
563	Atg14	atg14	ATG14
564	Atg16l1	atg16l1	ATG16L1
565	Atg3	atg3	ATG3
566	Atg4b	atg4b	ATG4B
567	Atg4c	atg4c	ATG4C
568	Atg5	atg5	ATG5
569	Atg7	atg7	ATG7
570	Atg9a	LOC116972469	ATG9A
571	Atic	atic	ATIC
572	Atl2	atl2	ATL2
573	Atm	atm	ATM
574	Atmin	atmin	ATMIN
575	Atoh7	atoh7	ATOH7
576	Atoh8	atoh8	ATOH8
577	Atox1	atox1	ATOX1
578	Atp13a1	atp13a1	ATP13A1
579	Atp13a2	atp13a2	ATP13A2
580	Atp13a3	atp13a3	ATP13A3
581	Atp1b1	atp1b1	ATP1B1
582	Atp1b4	atp1b4	ATP1B4
583	Atp23	atp23	ATP23
584	Atp4b	atp4b	ATP4B
585	Atp5b	atp5f1b	ATP5B
586	Atp5c1	atp5f1c	ATP5C1
587	Atp5d	atp5f1d	ATP5F1D
588	Atp5g3	atp5mc1	ATP5G3
589	Atp5k	LOC116973473	ATP5I
590	Atp5j2	atp5mf	ATP5J2
591	Atp5pb	LOC116987065	ATP5PB
592	Atp5h	atp5pd	ATP5PD
593	Atp5j	atp5pf	ATP5PF
594	Dmac2l	dmac2l	ATP5S
595	Atp6ap1	LOC116983797	ATP6AP1
596	Atp6v0a2	atp6v0a2	ATP6V0A2
597	Atp6v0a4	atp6v0a4	ATP6V0A4
598	Atp6v0b	atp6v0b	ATP6V0B
599	Atp6v0c	atp6v0c	ATP6V0C
600	Atp6v0d1	atp6v0d1	ATP6V0D1
601	Atp6v0e	atp6v0e1	ATP6V0E1
602	Atp6v0e2	LOC116981262	ATP6V0E2
603	Atp6v1a	atp6v1a	ATP6V1A
604	Atp6v1b2	LOC116981152	ATP6V1B2
605	Atp6v1c1	atp6v1c1	ATP6V1C1
606	Atp6v1d	atp6v1d	ATP6V1D
607	Atp6v1g1	LOC116990704	ATP6V1G1
608	Atp6v1g3	atp6v1g3	ATP6V1G3
609	Atp6v1h	atp6v1h	ATP6V1H
610	Atpaf1	atpaf1	ATPAF1
611	Atpaf2	atpaf2	ATPAF2
612	Atpsckmt	atpsckmt	ATPSCKMT
613	Atr	atr	ATR
614	Atrip	atrip	ATRIP
615	Atrx	atrx	ATRX
616	Atxn1	atxn1	ATXN1
617	Atxn10	atxn10	ATXN10
618	Atxn1l	atxn1l	ATXN1L
619	Atxn2	atxn2	ATXN2
620	Atxn3	atxn3	ATXN3L
621	Atxn7	atxn7	ATXN7
622	Atxn7l1	atxn7l1	ATXN7L1
623	Atxn7l3	atxn7l3	ATXN7L3
624	Auh	auh	AUH
625	Aup1	aup1	AUP1
626	Aurka	LOC116989194	AURKA
627	Aurkaip1	aurkaip1	AURKAIP1
628	Auts2	auts2	AUTS2
629	Aven	aven	AVEN
630	Avl9	avl9	AVL9
631	Avpr1a	avpr1a	AVPR1A
632	Avpr2	LOC116984259	AVPR2
633	Axin1	axin1	AXIN1
634	Tyro3	LOC116976759	AXL
635	Azi2	azi2	AZI2
636	Azin1	azin1	AZIN1
637	B3galnt2	b3galnt2	B3GALNT2
638	B3galt1	b3galt1	B3GALT1
639	B3galt2	b3galt2	B3GALT2
640	B3galt5	LOC116986114	B3GALT5
641	B3gat1	b3gat1	B3GAT1
642	B3gat2	LOC116973095	B3GAT2
643	B3gnt2	b3gnt2	B3GNT2
644	B3gnt4	b3gnt4	B3GNT4
645	B3gnt5	b3gnt5	B3GNT5
646	B3gnt7	b3gnt7	B3GNT7
647	B3gnt9	b3gnt9	B3GNT9
648	Gm34653	LOC116990862	B3GNTL
649	B3gntl1	b3gntl1	B3GNTL1
650	B4galnt3	b4galnt3	B4GALNT3
651	B4galt1	LOC116971096	B4GALT1
652	B4galt2	b4galt2	B4GALT2
653	B4galt3	b4galt3	B4GALT3
654	B4galt4	b4galt4	B4GALT4
655	B4galt5	b4galt5	B4GALT5
656	B4galt6	b4galt6	B4GALT6
657	B4galt7	b4galt7	B4GALT7
658	B9d1	b9d1	B9D1
659	Bace1	bace1	BACE1
660	Bace2	bace2	BACE2
661	Bach1	bach1	BACH1
662	Bach2	bach2	BACH2
663	Bag1	bag1	BAG1
664	Bag2	bag2	BAG2
665	Bag3	bag3	BAG3
666	Bag5	bag5	BAG5
667	Bahcc1	bahcc1	BAHCC1
668	Bahd1	bahd1	BAHD1
669	Baiap2	baiap2	BAIAP2
670	Baiap2l1	baiap2l1	BAIAP2L1
671	Baiap2l2	baiap2l2	BAIAP2L2
672	Bak1	bak1	BAK1
673	Bambi	bambi	BAMBI
674	Banf1	banf1	BANF1
675	Banp	banp	BANP
676	Bap1	bap1	BAP1
677	Bard1	bard1	BARD1
678	Barhl1	barhl1	BARHL1
679	Barhl2	barhl2	BARHL2
680	Barx1	barx1	BARX1
681	Barx2	barx2	BARX2
682	Batf	batf	BATF
683	Baz1b	baz1b	BAZ1B
684	Baz2b	baz2b	BAZ2B
685	Bbip1	bbip1	BBIP1
686	Bbox1	bbox1	BBOX1
687	Bbs12	bbs12	BBS12
688	Bbs2	bbs2	BBS2
689	Bbs4	bbs4	BBS4
690	Bbs5	bbs5	BBS5
691	Bbs7	bbs7	BBS7
692	Bbs9	bbs9	BBS9
693	Bbx	bbx	BBX
694	Bcap29	LOC116985166	BCAP29
695	Bcar1	bcar1	BCAR1
696	Bcas2	bcas2	BCAS2
697	Bcas3	bcas3	BCAS3
698	Bccip	bccip	BCCIP
699	Bcdin3d	bcdin3d	BCDIN3D
700	Bche	bche	BCHE
701	Bckdhb	bckdhb	BCKDHB
702	Bcl10	bcl10	BCL10
703	Bcl11a	bcl11a	BCL11A
704	Bcl11b	bcl11b	BCL11B
705	Bcl2	LOC116990365	BCL2
706	Bcl2l1	bcl2l1	BCL2L1
707	Bcl2l13	bcl2l13	BCL2L13
708	Bcl6	bcl6	BCL6
709	Bcl7b	bcl7b	BCL7B
710	Bcl9l	bcl9l	BCL9L
711	Bclaf1	bclaf1	BCLAF1
712	Bclaf3	bclaf3	BCLAF3
713	Bco1	bco1	BCO1
714	Bco2	bco2	BCO2
715	Bcor	bcor	BCOR
716	Bdh1	bdh1	BDH1A
717	Bdh2	bdh2	BDH2
718	Bdnf	bdnf	BDNF
719	Bean1	bean1	BEAN1
720	Becn1	becn1	BECN1
721	Bend4	bend4	BEND4
722	Bend7	bend7	BEND7
723	Best1	LOC116984400	BEST1
724	Best2	best4	BEST4
725	Bet1	bet1	BET1
726	Bfar	bfar	BFAR
727	Bfsp1	bfsp1	BFSP1
728	Bhlha15	bhlha15	BHLHA15
729	Bhlhe22	bhlhe22	BHLHE22
730	Bhlhe23	bhlhe23	BHLHE23
731	Bhlhe40	bhlhe40	BHLHE40
732	Bhlhe41	bhlhe41	BHLHE41
733	Bicc1	bicc1	BICC1
734	Bicd1	bicd1	BICD1
735	Bicd2	bicd2	BICD2
736	Bicdl1	bicdl1	BICDL1
737	Bicral	bicral	BICRAL
738	Bin1	bin1	BIN1
739	Bin2	bin2	BIN2
740	Bin3	bin3	BIN3
741	Birc2	LOC116974165	BIRC3
742	Birc5	birc5	BIRC5
743	Birc6	birc6	BIRC6
744	Xiap	xiap	BIRC8
745	Bivm	bivm	BIVM
746	Blcap	blcap	BLCAP
747	Blm	blm	BLM
748	Blmh	blmh	BLMH
749	Bloc1s2	bloc1s2	BLOC1S2
750	Bloc1s4	LOC116967490	BLOC1S4
751	Bloc1s6	bloc1s6	BLOC1S6
752	Blvra	blvra	BLVRA
753	Blzf1	blzf1	BLZF1
754	Bmi1	LOC116985375	BMI1
755	Bmp10	LOC116967351	BMP10
756	Bmp15	bmp15	BMP15
757	Bmp2	bmp2	BMP2
758	Bmp2k	bmp2k	BMP2K
759	Bmp3	bmp3	BMP3
760	Bmp4	bmp4	BMP4
761	Bmp5	bmp5	BMP5
762	Bmp7	bmp6	BMP7
763	Bmper	bmper	BMPER
764	Bmpr1a	bmpr1a	BMPR1A
765	Bmpr1b	bmpr1b	BMPR1B
766	Bmpr2	bmpr2	BMPR2
767	Bms1	bms1	BMS1
768	Bmt2	bmt2	BMT2
769	Bnc2	bnc2	BNC2
770	Bnip1	bnip1	BNIP1
771	Bnip2	LOC116968911	BNIP2
772	Bnip3	LOC116981038	BNIP3
773	Bnip3l	bnip3l	BNIP3L
774	Bok	bok	BOK
775	Bop1	bop1	BOP1
776	Borcs5	borcs5	BORCS5
777	Borcs6	borcs6	BORCS6
778	Borcs7	borcs7	BORCS7
779	Borcs8	borcs8	BORCS8
780	Bpgm	bpgm	BPGM
781	Bpnt1	bpnt1	BPNT1
782	Impad1	bpnt2	BPNT2
783	Braf	braf	BRAF
784	Brap	brap	BRAP
785	Brat1	brat1	BRAT1
786	Brca1	brca1	BRCA1
787	Brca2	brca2	BRCA2
788	Brd2	LOC116990175	BRD2
789	Brd3	brd3	BRD3
790	Brd7	brd7	BRD7
791	Brd8	brd8	BRD8
792	Babam2	babam2	BRE
793	Brf1	brf1	BRF1
794	Brf2	brf2	BRF2
795	Bri3	bri3	BRI3
796	Bri3bp	bri3bp	BRI3BP
797	Brinp1	brinp1	BRINP1
798	Brms1l	brms1l	BRMS1L
799	Brox	brox	BROX
800	Brsk2	brsk2	BRSK1
801	Bsdc1	bsdc1	BSDC1
802	Bsn	bsn	BSN
803	Bspry	bspry	BSPRY
804	Bst1	LOC116973094	BST1
805	Bsx	bsx	BSX
806	Btaf1	btaf1	BTAF1
807	Btbd10	btbd10	BTBD10
808	Btbd11	btbd11	BTBD11
809	Btbd17	btbd17	BTBD17
810	Btbd19	btbd19	BTBD19
811	Btbd2	LOC116989315	BTBD2
812	Btbd3	btbd3	BTBD3
813	Btbd6	btbd6	BTBD6
814	Btbd7	btbd7	BTBD7
815	Btbd9	btbd9	BTBD9
816	Btd	btd	BTD
817	Btf3	btf3	BTF3
818	Btg1	LOC116984002	BTG1
819	Btg2	LOC116986646	BTG2
820	Btg4	btg4	BTG4
821	Btrc	LOC116967488	BTRC
822	Bub1	bub1	BUB1
823	Bub1b	bub1b	BUB1B
824	Bub3	bub3	BUB3
825	Bud13	bud13	BUD13
826	Bud31	bud31	BUD31
827	Bysl	bysl	BYSL
828	Bzw1	bzw1	BZW1
829	Bzw2	bzw2	BZW2
830	Twnk	twnk	C10orf2
831	3425401B19Rik	c37h10orf71	C10orf71
832	2310057M21Rik	c15h10orf88	C10orf88
833	D230025D16Rik	c17h16orf70	C11H16orf70
834	4921524J17Rik	c17h16orf87	C11H16ORF87
835	1110032A03Rik	c33h11orf1	C11orf1
836	1110051M20Rik	c20h11orf49	C11orf49
837	A930018P22Rik	c20h11orf91	C11orf91
838	4930430F08Rik	c19h12orf29	C12orf29
839	D6Wsu163e	c21h12orf4	C12orf4
840	BC048403	c19h12orf66	C12orf66
841	9530068E07Rik	LOC116978267	C13H5orf15
842	Bmerb1	bmerb1	C14H16orf45
843	2410131K14Rik	c25h12orf49	C15H12orf49
844	2810006K23Rik	c25h12orf65	C15H12ORF65
845	AA467197	c34h15orf48	C15orf48
846	2300009A05Rik	c34h15orf61	C15orf61
847	1810013L24Rik	c22h16orf72	C16orf72
848	AU021092	LOC116985867	C16orf89
849	1110008P14Rik	c32h9orf16	C17H9orf16
850	1810010H24Rik	c26h17orf58	C17orf58
851	5730455P16Rik	c26h17orf75	C17orf75
852	2700062C07Rik	c2h18orf21	C18orf21
853	Gm17266	c4h18orf63	C18orf63
854	2310011J03Rik	c29h19orf25	C19orf25
855	1700030K09Rik	c29h19orf44	C19orf44
856	C1d	c1d	C1D
857	C1galt1	c1galt1	C1GALT1
858	C1galt1c1	c1galt1c1	C1GALT1C1
859	4931406C07Rik	c28h11orf54	C1H11ORF54
860	Cfap300	cfap300	C1H11ORF70
861	1190007I07Rik	c19h12orf73	C1H12ORF73
862	Cfap298	cfap298	C1H21ORF59
863	D16Ertd472e	c14h21orf91	C1H21ORF91
864	AI597479	c6h2orf49	C1H2ORF49
865	BC055324	c10h1orf112	C1orf112
866	1700012P22Rik	c31h1orf158	C1orf158
867	9430015G10Rik	c31h1orf159	C1orf159
868	2310022B05Rik	c8h1orf198	C1orf198
869	2610528J11Rik	c10h1orf210	C1orf210
870	5730409E04Rik	c27h1orf216	C1orf216
871	Gm30191	c27h1orf232	C1orf232
872	2310033P09Rik	c4h1orf35	C1orf35
873	AU022252	c31h1orf50	C1orf50
874	C1qb	LOC116990425	C1QB
875	C1qbp	c1qbp	C1QBP
876	C1qc	LOC116990399	C1QC
877	C1ql1	c1ql1	C1QL1
878	C1ql3	c1ql3	C1QL3
879	C1qtnf12	c1qtnf12	C1QTNF12
880	C1qtnf2	c1qtnf2	C1QTNF2
881	C1qtnf4	c1qtnf4	C1QTNF4
882	C1qtnf5	c1qtnf5	C1QTNF5
883	C1qtnf7	c1qtnf7	C1QTNF7
884	Rab5if	rab5if	C20H20ORF24
885	4930402H24Rik	c1h20orf194	C20orf194
886	1700021F07Rik	c23h20orf85	C20orf85
887	2610028H24Rik	c7h21orf58	C21orf58
888	C87436	c39h2orf42	C22H2ORF42
889	Ilrun	ilrun	C26H6orf106
890	Uqcc2	LOC116986799	C26H6ORF125
891	C2cd2	c2cd2	C2CD2
892	C2cd2l	c2cd2l	C2CD2L
893	C2cd4c	c2cd4c	C2CD4C
894	C2cd5	c2cd5	C2CD5
895	C3	LOC116966058	C3
896	Stum	stum	C3H1orf95
897	1600012H06Rik	c29h6orf120	C3H6orf120
898	Mtres1	mtres1	C3H6ORF203
899	6430571L13Rik	c18h3orf18	C3orf18
900	E130311K13Rik	c13h3orf33	C3orf33
901	4930453N24Rik	LOC116980418	C3orf38
902	2510009E07Rik	c7h3orf70	C3orf70
903	D3Ertd751e	c1h4orf33	C4orf33
904	4930579G24Rik	c1h4orf46	C4orf46
905	1700029J07Rik	c3h4orf47	C4orf47
906	1110004F10Rik	c20h11orf58	C5H11orf58
907	Gm13889	c20h11orf96	C5H11ORF96
908	Rtraf	rtraf	C5H14orf166
909	Riox1	riox1	C5H14ORF169
910	BC052040	c9h15orf41	C5H15orf41
911	Ccdc32	ccdc32	C5H15orf57
912	6030458C11Rik	c2h5orf22	C5orf22
913	B230219D22Rik	cunh5orf24	C5orf24
914	4833420G17Rik	c3h5orf34	C5orf34
915	1700001L19Rik	c2h5orf49	C5orf49
916	2310057J18Rik	c5h6orf58	C6orf58
917	BC005537	c2h6orf62	C6orf62
918	3110009E18Rik	c7h2orf76	C7H2ORF76
919	AW209491	c4h7orf25	C7orf25
920	E130309D02Rik	c22h7orf26	C7orf26
921	3110082I17Rik	c22h7orf50	C7orf50
922	Gm11992	LOC116970516	C7orf57
923	1810058I24Rik	stmp1	C7orf73
924	C8a	c8a	C8A
925	C8b	LOC116978123	C8B
926	C8g	c8g	C8G
927	A830018L16Rik	c4h8orf34	C8orf34
928	2610301B20Rik	c4h8orf37	C8orf37
929	Cfap410	cfap410	C9H21orf2
930	Snorc	snorc	C9H2ORF82
931	2210016F16Rik	c3h9orf64	C9orf64
932	Tmem250-ps	tmem250	C9orf69
933	C9orf72	c9orf72	C9orf72
934	BC005624	c32h9orf78	C9orf78
935	1110059E24Rik	c3h9orf85	C9orf85
936	Car12	ca12	CA12
937	Car13	LOC116972468	CA13
938	Car7	ca7	CA7
939	Car8	ca8	CA8
940	Car9	ca9	CA9
941	Caap1	caap1	CAAP1
942	Cab39	cab39	CAB39
943	Cabin1	cabin1	CABIN1
944	Cables2	cables2	CABLES2
945	Cabp1	cabp1	CABP1
946	Cabp7	cabp7	CABP7
947	Cacfd1	cacfd1	CACFD1
948	Cachd1	cachd1	CACHD1
949	Cacna1h	LOC116988061	CACNA1G
950	Cacnb1	cacnb1	CACNB1
951	Cacnb2	cacnb2	CACNB2
952	Cacnb4	cacnb4	CACNB4
953	Cacng1	cacng1	CACNG1
954	Cacng2	cacng2	CACNG2
955	Cacng3	cacng3	CACNG3
956	Cacng4	cacng4	CACNG4
957	Cacng5	cacng5	CACNG5
958	Cacul1	cacul1	CACUL1
959	Cadm1	cadm1	CADM1
960	Calb1	calb1	CALB1
961	Calb2	calb2	CALB2
962	Calca	calcb	CALCA
963	Calcr	calcr	CALCR
964	Calcrl	calcrl	CALCRL
965	Cald1	cald1	CALD1
966	Calhm1	LOC116981283	CALHM1
967	Calhm4	calhm4	CALHM4
968	Calml4	calml4	CALML4
969	Calr	calr	CALR
970	Camk1	camk1	CAMK1
971	Camk2n2	camk2n2	CAMK2N2
972	Camk4	camk4	CAMK4
973	Camkk1	camkk1	CAMKK1
974	Camkmt	camkmt	CAMKMT
975	Camkv	camkv	CAMKV
976	Caml	camlg	CAMLG
977	Camsap1	camsap1	CAMSAP1
978	Camsap2	camsap2	CAMSAP2
979	Cant1	cant1	CANT1
980	Canx	clgn	CANX
981	Cap1	cap1	CAP1
982	Capn10	capn10	CAPN10
983	Capn15	capn15	CAPN15
984	Capn2	LOC116976011	CAPN2
985	Capn3	capn3	CAPN3
986	Capn5	capn5	CAPN5
987	Capn7	capn7	CAPN7
988	Capn9	capn9	CAPN9
989	Caprin1	caprin1	CAPRIN1
990	Caprin2	caprin2	CAPRIN2
991	Caps2	caps2	CAPS2
992	Capsl	capsl	CAPSL
993	Capza2	capza2	CAPZA2
994	Capzb	capzb	CAPZB
995	Card11	card11	CARD11
996	Card9	card9	CARD9
997	Carf	carf	CARF
998	Carhsp1	carhsp1	CARHSP1
999	Carmil1	carmil1	CARMIL1
1000	Carnmt1	carnmt1	CARNMT1
1001	Cars	cars1	CARS
1002	Cars2	cars2	CARS2
1003	Cartpt	cartpt	CARTPT
1004	Casc3	casc3	CASC3
1005	Casc4	golm2	CASC4
1006	Casd1	casd1	CASD1
1007	Cask	cask	CASK
1008	Caskin2	caskin2	CASKIN2
1009	Casp3	casp3	CASP3
1010	Casp7	casp7	CASP7
1011	Casp8	LOC116975395	CASP8
1012	Casp8ap2	casp8ap2	CASP8AP2
1013	Casp9	casp9	CASP9
1014	Casq2	casq2	CASQ2
1015	Casr	casr	CASR
1016	Cass4	cass4	CASS4
1017	Casz1	casz1	CASZ1
1018	Cat	cat	CAT
1019	Cav1	cav1	CAV1
1020	Cav2	LOC116983158	CAV2
1021	Cav3	cav3	CAV3
1022	Cavin2	cavin2	CAVIN3
1023	Cavin4	LOC116966108	CAVIN4
1024	Cbarp	cbarp	CBARP
1025	Cbfa2t2	cbfa2t2	CBFA2T2
1026	Cbfb	cbfb	CBFB
1027	Cbl	cbl	CBL
1028	Cblb	cblb	CBLB
1029	Cbll1	cbll1	CBLL1
1030	Cbln2	cbln2	CBLN2
1031	Cbln4	cbln4	CBLN3
1032	Cbwd1	cbwd1	CBWD1
1033	Cbx2	cbx2	CBX2
1034	Cbx3	cbx3	CBX3
1035	Cbx4	cbx4	CBX4
1036	Cbx6	cbx6	CBX6
1037	Cbx8	cbx8	CBX8
1038	Cby1	cby1	CBY1
1039	Cc2d1b	cc2d1b	CC2D1B
1040	Cc2d2a	cc2d2a	CC2D2A
1041	Ccbe1	ccbe1	CCBE1
1042	Ccdc102a	ccdc102a	CCDC102A
1043	Ccdc112	ccdc112	CCDC112
1044	Ccdc113	ccdc113	CCDC113
1045	Ccdc12	ccdc12	CCDC12
1046	Ccdc122	ccdc122	CCDC122
1047	Ccdc130	ccdc130	CCDC130
1048	Ccdc134	ccdc134	CCDC134
1049	Ccdc137	ccdc137	CCDC137
1050	Ccdc14	ccdc14	CCDC14
1051	Ccdc141	ccdc141	CCDC141
1052	Ccdc148	ccdc148	CCDC148
1053	Ccdc149	ccdc149	CCDC149
1054	Ccdc157	ccdc157	CCDC157
1055	Ccdc170	ccdc170	CCDC170
1056	Ccdc171	ccdc171	CCDC171
1057	Ccdc172	ccdc172	CCDC172
1058	Ccdc174	ccdc174	CCDC174
1059	Ccdc18	LOC116969740	CCDC18
1060	Ccdc181	ccdc181	CCDC181
1061	Ccdc186	ccdc186	CCDC186
1062	Ccdc191	ccdc191	CCDC191
1063	Ccdc25	ccdc25	CCDC25
1064	Ccdc28a	ccdc28a	CCDC28A
1065	Ccdc28b	ccdc28b	CCDC28B
1066	Ccdc3	ccdc3	CCDC3
1067	Ccdc40	ccdc40	CCDC40
1068	Ccdc43	ccdc43	CCDC43
1069	Ccdc47	ccdc47	CCDC47
1070	Ccdc50	ccdc50	CCDC50
1071	Ccdc58	ccdc58	CCDC58
1072	Ccdc59	ccdc59	CCDC59
1073	Ccdc6	ccdc6	CCDC6
1074	Ccdc61	ccdc61	CCDC61
1075	Ccdc65	ccdc65	CCDC65
1076	Ccdc66	ccdc66	CCDC66
1077	Ccdc77	ccdc77	CCDC77
1078	Ccdc78	ccdc78	CCDC78
1079	Ccdc80	ccdc80	CCDC80
1080	Ccdc82	ccdc82	CCDC82
1081	Ccdc85a	ccdc85a	CCDC85A
1082	Ccdc85c	ccdc85c	CCDC85C
1083	Ccdc88a	ccdc88a	CCDC88A
1084	Ccdc88c	ccdc88c	CCDC88C
1085	Ccdc89	ccdc89	CCDC89
1086	Ccdc90b	ccdc90b	CCDC90B
1087	Ccdc91	ccdc91	CCDC91
1088	Ccdc92	ccdc92	CCDC92
1089	Ccdc93	ccdc93	CCDC93
1090	Cck	LOC116967864	CCK
1091	Cckar	cckar	CCKAR
1092	Ccm2	ccm2	CCM2
1093	Ccm2l	ccm2l	CCM2L
1094	Ccn3	ccn3	CCN3
1095	Ccna1	ccna1	CCNA1
1096	Ccna2	ccna2	CCNA2
1097	Ccnb2	ccnb2	CCNB1
1098	Ccnb3	ccnb3	CCNB3
1099	Ccnc	ccnc	CCNC
1100	Ccnd1	ccnd1	CCND1
1101	Ccnd2	ccnd2	CCND2
1102	Ccndbp1	ccndbp1	CCNDBP1
1103	Ccne1	ccne1	CCNE1
1104	Ccnf	ccnf	CCNF
1105	Ccng1	LOC116978235	CCNG1
1106	Ccng2	ccng2	CCNG2
1107	Ccni	ccni	CCNI
1108	Ccnj	ccnj	CCNJ
1109	Ccnjl	ccnjl	CCNJL
1110	Ccnk	ccnk	CCNK
1111	Ccnl1	ccnl1	CCNL1
1112	Ccnl2	LOC116990354	CCNL2
1113	Ccno	ccno	CCNO
1114	Ccny	ccny	CCNY
1115	Ccnyl1	ccnyl1	CCNYL1
1116	Ccp110	ccp110	CCP110
1117	Ccpg1	ccpg1	CCPG1
1118	Ccr4	LOC116984508	CCR4
1119	Ccr6	ccr6	CCR6
1120	Ccr9	LOC116984648	CCR9
1121	Ccser1	ccser1	CCSER1
1122	Ccser2	ccser2	CCSER2
1123	Cct2	cct2	CCT2
1124	Cct4	cct4	CCT4
1125	Cct5	cct5	CCT5
1126	Cct6a	cct6a	CCT6A
1127	Cct7	cct7	CCT7
1128	Cct8	cct8	CCT8
1129	Ccz1	ccz1	CCZ1
1130	Cd109	cd109	CD109
1131	Cd151	cd151	CD151
1132	Cd247	cd247	CD247
1133	Cd93	cd93	CD248
1134	Cd276	cd276	CD276
1135	Cd28	LOC116974840	CD28
1136	Cd2ap	cd2ap	CD2AP
1137	Cd36	cd36	CD36
1138	Cd38	LOC116976140	CD38
1139	Cd44	cd44	CD44
1140	Cd63	cd63	CD63
1141	Cd74	cd74	CD74
1142	Cd79b	LOC116982100	CD79B
1143	Cd81	cd81	CD81
1144	Cd9	cd9	CD9
1145	Cd99l2	cd99l2	CD99L2
1146	Cdadc1	cdadc1	CDADC1
1147	Cdc123	cdc123	CDC123
1148	Cdc14a	cdc14a	CDC14A
1149	Cdc16	cdc16	CDC16
1150	Cdc20	cdc20	CDC20
1151	Cdc23	cdc23	CDC23
1152	Cdc25a	cdc25b	CDC25A
1153	Cdc27	cdc27	CDC27
1154	Cdk11b	cdk11a	CDC2L1
1155	Cdc37	cdc37	CDC37
1156	Cdc37l1	cdc37l1	CDC37L1
1157	Cdc40	cdc40	CDC40
1158	Cdc42	cdc42	CDC42
1159	Cdc42ep1	cdc42ep1	CDC42EP1
1160	Cdc42ep3	LOC116972948	CDC42EP3
1161	Cdc42ep4	cdc42ep4	CDC42EP4
1162	Cdc42se1	cdc42se1	CDC42SE1
1163	Cdc42se2	cdc42se2	CDC42SE2
1164	Cdc45	cdc45	CDC45
1165	Cdc6	cdc6	CDC6
1166	Cdc7	cdc7	CDC7
1167	Cdc73	cdc73	CDC73
1168	Cdca4	LOC116976705	CDCA4
1169	Cdca7l	cdca7l	CDCA7L
1170	Cdcp2	cdcp2	CDCP2
1171	Cdh11	LOC116982592	CDH11
1172	Cdh13	cdh13	CDH13
1173	Acsf3	LOC116969777	CDH15
1174	Cdh17	cdh17	CDH17
1175	Cdh18	LOC116990944	CDH18
1176	Cdh20	LOC116990886	CDH20
1177	Cdh23	cdh23	CDH23
1178	Cdh7	LOC116972101	CDH7
1179	Cdh8	LOC116982590	CDH8
1180	Cdhr1	cdhr1	CDHR1
1181	Cdhr2	LOC116971389	CDHR2
1182	Cdhr4	cdhr4	CDHR4
1183	Cdip1	cdip1	CDIP1
1184	Cdk1	cdk1	CDK1
1185	Cdk10	cdk10	CDK10
1186	Cdk14	cdk14	CDK14
1187	Cdk17	cdk17	CDK17
1188	Cdk18	cdk18	CDK18
1189	Cdk2	cdk2	CDK2
1190	Cdk5	cdk5	CDK5
1191	Cdk5r1	cdk5r1	CDK5R1
1192	Cdk5rap1	cdk5rap1	CDK5RAP1
1193	Cdk5rap3	cdk5rap3	CDK5RAP3
1194	Cdk6	cdk6	CDK6
1195	Cdk7	cdk7	CDK7
1196	Cdk8	cdk8	CDK8
1197	Cdk9	cdk9	CDK9
1198	Cdkal1	cdkal1	CDKAL1
1199	Cdkl1	cdkl1	CDKL1
1200	Cdkl5	cdkl5	CDKL5
1201	Cdkn1b	cdkn1b	CDKN1B
1202	Cdkn2aip	LOC116970241	CDKN2AIP
1203	Cdkn3	cdkn3	CDKN3
1204	Cdon	cdon	CDON
1205	Cdpf1	cdpf1	CDPF1
1206	Cdr2l	cdr2l	CDR2L
1207	Cds1	cds1	CDS1
1208	Cds2	cds2	CDS2
1209	Cdt1	cdt1	CDT1
1210	Cdyl2	cdyl2	CDYL2
1211	Cebpb	cebpb	CEBPB
1212	Cebpd	cebpd	CEBPD
1213	Cebpg	cebpg	CEBPG
1214	Cebpz	cebpz	CEBPZ
1215	Cebpzos	cebpzos	CEBPZOS
1216	Cecr2	LOC116984565	CECR2
1217	Cel	cel	CEL
1218	Cela2a	LOC116990607	CELA2A
1219	Celf2	celf2	CELF2
1220	Ccdc84	ccdc84	CENATAC
1221	Cenpc1	cenpc	CENPC
1222	Cenpe	cenpe	CENPE
1223	Cenpf	cenpf	CENPF
1224	Cenph	cenph	CENPH
1225	Cenpi	cenpi	CENPI
1226	Cenpj	cenpj	CENPJ
1227	Cenpl	cenpl	CENPL
1228	Cenpm	cenpm	CENPM
1229	Cenpn	cenpn	CENPN
1230	Cenpp	cenpp	CENPP
1231	Cenps	cenps	CENPS
1232	Cenpu	cenpu	CENPU
1233	Cenpw	cenpw	CENPW
1234	Cenpx	cenpx	CENPX
1235	Cep104	cep104	CEP104
1236	Cep112	cep112	CEP112
1237	Cep120	cep120	CEP120
1238	Cep128	cep128	CEP128
1239	Cep131	cep131	CEP131
1240	Cep135	cep135	CEP135
1241	Cep162	cep162	CEP162
1242	Cep164	cep164	CEP164
1243	Cep170	cep170	CEP170
1244	Cep19	cep19	CEP19
1245	Cep192	cep192	CEP192
1246	Cep350	cep350	CEP350
1247	Cep41	cep41	CEP41
1248	Fgfr1op	cep43	CEP43
1249	Cep44	cep44	CEP44
1250	Cep55	cep55	CEP55
1251	Cep57	cep57	CEP57
1252	Cep70	cep70	CEP70
1253	Cep76	cep76	CEP76
1254	Cep78	cep78	CEP78
1255	Cep83	cep83	CEP83
1256	Cep85	cep85	CEP85
1257	Cep85l	cep85l	CEP85L
1258	Cep89	cep89	CEP89
1259	Cep95	cep95	CEP95
1260	Cept1	cept1	CEPT1
1261	Cerk	cerk	CERK
1262	Cers1	cers1	CERS1
1263	Cers2	cers3	CERS2
1264	Col4a3bp	cert1	CERT1
1265	Cetn2	LOC116969808	CETN1
1266	Cetn3	cetn3	CETN3
1267	Cfap100	cfap100	CFAP100
1268	Cfap126	cfap126	CFAP126
1269	Cfap161	cfap161	CFAP161
1270	Cfap20	cfap20	CFAP20
1271	4930452B06Rik	cfap20dc	CFAP20DC
1272	Cfap221	cfap221	CFAP221
1273	Cfap36	cfap36	CFAP36
1274	Cfap45	LOC116986875	CFAP45
1275	Cfap57	cfap57	CFAP57
1276	Cfap58	cfap58	CFAP58
1277	Cfap65	cfap65	CFAP65
1278	Cfap69	cfap69	CFAP69
1279	Cfap70	cfap70	CFAP70
1280	Cfap77	cfap77	CFAP77
1281	1810020O05Rik	cfap92	CFAP92
1282	Casc1	casc1	CFAP94
1283	Cfap99	cfap99	CFAP99
1284	Tdgf1	LOC116979756	CFC1
1285	Cfdp1	cfdp1	CFDP1
1286	Cfi	cfi	CFI
1287	Cfl2	cfl2	CFL2
1288	Cflar	cflar	CFLAR
1289	Cftr	cftr	CFTR
1290	Cga	cga	CGA
1291	Cgas	cgas	CGAS
1292	Cgnl1	cgnl1	CGNL1
1293	Cgrrf1	cgrrf1	CGRRF1
1294	Ch25h	ch25h	CH25H
1295	Chac2	chac2	CHAC2
1296	Chaf1a	chaf1a	CHAF1A
1297	Chaf1b	chaf1b	CHAF1B
1298	Champ1	LOC116974317	CHAMP1
1299	Chat	chat	CHAT
1300	Chchd1	chchd1	CHCHD1
1301	Chchd3	chchd3	CHCHD3
1302	Chchd4	chchd4	CHCHD4
1303	Chchd5	chchd5	CHCHD5
1304	Chd1l	chd1l	CHD1L
1305	Chdh	chdh	CHDH
1306	Chek2	chek2	CHEK2
1307	Cherp	cherp	CHERP
1308	Chfr	chfr	CHFR
1309	Chga	chga	CHGA
1310	Chgb	chgb	CHGB
1311	Chic2	chic2	CHIC2
1312	Chid1	chid1	CHID1
1313	Chka	LOC116984656	CHKA
1314	Chm	chm	CHM
1315	Chmp1a	chmp1a	CHMP1A
1316	Chmp2b	chmp2b	CHMP2B
1317	Chmp4b	chmp4b	CHMP4B
1318	Chmp5	chmp5	CHMP5
1319	Chmp6	chmp6	CHMP6
1320	Chmp7	chmp7	CHMP7
1321	Chn1	chn1	CHN1
1322	Chodl	chodl	CHODL
1323	Chordc1	chordc1	CHORDC1
1324	Chp1	chp1	CHP1
1325	Chpf2	chpf2	CHPF2
1326	Chrac1	chrac1	CHRAC1
1327	Chrd	chrd	CHRD
1328	Chrdl1	chrdl1	CHRDL1
1329	Chrm3	chrm3	CHRM3
1330	Chrm4	chrm4	CHRM4
1331	Chrm5	chrm5	CHRM5
1332	Chrna1	chrna1	CHRNA1
1333	Chrna3	LOC116971239	CHRNA3
1334	Chrna4	LOC116986519	CHRNA4
1335	Chrna9	chrna9	CHRNA9
1336	Chrnb2	LOC116971238	CHRNB2
1337	Chrnb3	chrnb3	CHRNB3
1338	Chrnd	chrnd	CHRND
1339	Chst10	chst10	CHST10
1340	Chst11	chst11	CHST11
1341	Chst12	chst12	CHST12
1342	Chst14	chst14	CHST14
1343	Chst15	chst15	CHST15
1344	Chst2	chst2	CHST2
1345	Chst3	chst3	CHST3
1346	Chst7	chst7	CHST7
1347	Chst8	chst8	CHST8
1348	Chst9	chst9	CHST9
1349	Chtf18	chtf18	CHTF18
1350	Chtf8	chtf8	CHTF8
1351	Churc1	churc1	CHURC1
1352	Ciao1	ciao1	CIAO1
1353	Ciao2b	ciao2b	CIAO2B
1354	Ciapin1	ciapin1	CIAPIN1
1355	Cib2	cib2	CIB2
1356	Cib3	LOC116989318	CIB3
1357	Cib1	cib1	CIB4
1358	Cidec	cidec	CIDEC
1359	Cilk1	cilk1	CILK1
1360	Cinp	cinp	CINP
1361	Cipc	cipc	CIPC
1362	Cisd1	cisd1	CISD1
1363	Cisd2	cisd2	CISD2
1364	Cish	cish	CISH
1365	Cit	cit	CIT
1366	Cited2	cited2	CITED2
1367	Ckap2	ckap2	CKAP2
1368	Ckap4	ckap4	CKAP4
1369	Ckap5	ckap5	CKAP5
1370	Ckb	ckb	CKB
1371	Ckmt1	LOC116968319	CKMT1B
1372	Cks2	cks2	CKS2
1373	Clcc1	clcc1	CLCC1
1374	Clcn6	clcn6	CLCN6
1375	Clcn7	clcn7	CLCN7
1376	Cldn1	LOC116979831	CLDN1
1377	Cldn14	cldn14	CLDN14
1378	Cldn16	cldn16	CLDN16
1379	Cldn18	cldn18	CLDN18
1380	Cldn19	cldn19	CLDN19
1381	Cldn2	cldn2	CLDN2
1382	Cldn23	LOC116971103	CLDN23
1383	Cldn5	cldn5	CLDN5
1384	Cldn8	cldn8	CLDN8
1385	Clec16a	clec16a	CLEC16A
1386	Clec3a	clec3a	CLEC3A
1387	Clic4	clic4	CLIC4
1388	Clic5	clic5	CLIC5
1389	Clint1	clint1	CLINT1
1390	Clip1	clip1	CLIP1
1391	Clip2	clip2	CLIP2
1392	Clip4	clip4	CLIP4
1393	Clmn	LOC116977163	CLMN
1394	Clmp	clmp	CLMP
1395	Cln5	cln5	CLN5
1396	Cln6	cln6	CLN6
1397	Cln8	cln8	CLN8
1398	Clns1a	clns1a	CLNS1A
1399	Clps	clps	CLPS
1400	Clptm1	clptm1	CLPTM1
1401	Clptm1l	clptm1l	CLPTM1L
1402	Clpx	clpx	CLPX
1403	Clrn1	clrn1	CLRN1
1404	Clrn2	clrn2	CLRN2
1405	Clspn	clspn	CLSPN
1406	Clta	cltb	CLTA
1407	Cluap1	cluap1	CLUAP1
1408	Clu	clu	CLUL1
1409	Clvs1	clvs1	CLVS1
1410	Clvs2	clvs2	CLVS2
1411	Clybl	clybl	CLYBL
1412	Cmas	cmas	CMAS
1413	Cmc2	cmc2	CMC2
1414	Cmc4	cmc4	CMC4
1415	Cmip	cmip	CMIP
1416	Cmpk1	cmpk1	CMPK1
1417	Cmpk2	cmpk2	CMPK2
1418	Cmss1	cmss1	CMSS1
1419	Cmtm3	cmtm3	CMTM3
1420	Cmtm4	cmtm4	CMTM4
1421	Cmtm6	cmtm6	CMTM6
1422	Cmtm7	cmtm7	CMTM7
1423	Cmtm8	cmtm8	CMTM8
1424	Cmtr2	cmtr2	CMTR2
1425	Cnbp	cnbp	CNBP
1426	Cndp2	LOC116971890	CNDP2
1427	Cnep1r1	cnep1r1	CNEP1R1
1428	Cnga1	cnga1	CNGA1
1429	Cnga3	cnga3	CNGA3
1430	Cnih1	cnih1	CNIH1
1431	Cnih3	cnih3	CNIH3
1432	Cnih4	cnih4	CNIH4
1433	Cnksr1	cnksr1	CNKSR1
1434	Cnn1	cnn1	CNN1
1435	Cnn2	cnn2	CNN2
1436	Cnn3	cnn3	CNN3
1437	Cnnm2	cnnm2	CNNM2
1438	Cnot1	cnot1	CNOT1
1439	Cnot10	cnot10	CNOT10
1440	Cnot11	cnot11	CNOT11
1441	Cnot2	cnot2	CNOT2
1442	Cnot4	cnot4	CNOT4
1443	Cnot6	cnot6	CNOT6
1444	Cnot6l	cnot6l	CNOT6L
1445	Cnot7	cnot7	CNOT7
1446	Cnot9	cnot9	CNOT9
1447	Cnp	cnp	CNP
1448	Cnppd1	cnppd1	CNPPD1
1449	Cnpy3	LOC116978893	CNPY3
1450	Cnr1	cnr1	CNR1
1451	Cnrip1	cnrip1	CNRIP1
1452	Cnst	cnst	CNST
1453	Cntd1	cntd1	CNTD1
1454	Cntfr	cntfr	CNTFR
1455	Cntln	cntln	CNTLN
1456	Cntn1	cntn1	CNTN1
1457	Cntn2	cntn2	CNTN2
1458	Cntrl	cntrl	CNTRL
1459	Coa5	LOC116974588	COA5
1460	Coa6	LOC116976221	COA6
1461	Coa7	LOC116977829	COA7
1462	Apopt1	LOC116976952	COA8
1463	Coasy	coasy	COASY
1464	Cobl	cobl	COBL
1465	Coch	coch	COCH
1466	Cog1	cog1	COG1
1467	Cog2	cog2	COG2
1468	Cog3	cog3	COG3
1469	Cog4	cog4	COG4
1470	Cog5	cog5	COG5
1471	Cog6	cog6	COG6
1472	Cog7	cog7	COG7
1473	Col17a1	col17a1	COL17A1
1474	Col1a1	col1a1	COL1A1
1475	Col1a2	col1a2	COL1A2
1476	Col22a1	col22a1	COL22A1
1477	Col26a1	emid1	COL26A1
1478	Col28a1	LOC116984831	COL28A1
1479	Col5a1	col5a1	COL5A1
1480	Col6a1	col6a1	COL6A1
1481	Col6a2	col6a2	COL6A2
1482	Col6a3	LOC116974988	COL6A3
1483	Col8a1	col8a1	COL8A1
1484	Col8a2	col8a2	COL8A2
1485	Col9a1	LOC116972370	COL9A1
1486	Colec10	colec10	COLEC10
1487	Colec11	colec11	COLEC11
1488	Colec12	colec12	COLEC12
1489	Colgalt1	colgalt1	COLGALT1
1490	Colgalt2	colgalt2	COLGALT2
1491	Colq	colq	COLQ
1492	Commd10	commd10	COMMD10
1493	Commd2	commd2	COMMD2
1494	Commd4	LOC116968171	COMMD4
1495	Commd5	commd5	COMMD5
1496	Commd7	commd7	COMMD7
1497	Commd8	commd8	COMMD8
1498	Commd9	commd9	COMMD9
1499	Comt	comt	COMT
1500	Cop1	cop1	COP1
1501	Copa	copa	COPA
1502	Copb1	copb1	COPB1
1503	Copb2	copb2	COPB2
1504	Cope	cope	COPE
1505	Cops2	cops2	COPS2
1506	Cops3	cops3	COPS3
1507	Cops4	cops4	COPS4
1508	Cops5	cops5	COPS5
1509	Cops7b	cops7b	COPS7B
1510	Cops8	cops8	COPS8
1511	Cops9	cops9	COPS9
1512	Copz1	copz2	COPZ1
1513	Coq10b	coq10b	COQ10B
1514	Coq2	coq2	COQ2
1515	Coq3	coq3	COQ3
1516	Coq4	coq4	COQ4
1517	Coq5	coq5	COQ5
1518	Coq6	coq6	COQ6
1519	Coq7	coq7	COQ7
1520	Coq8a	coq8a	COQ8A
1521	Coq9	coq9	COQ9
1522	Corin	corin	CORIN
1523	Coro1c	coro1c	CORO1C
1524	Coro2a	LOC116971177	CORO2A
1525	Coro2b	coro2b	CORO2B
1526	Coro7	LOC116985729	CORO7
1527	Cotl1	cotl1	COTL1
1528	Cox10	LOC116987808	COX10
1529	Cox11	LOC116979117	COX11
1530	Cox15	LOC116981233	COX15
1531	Cox16	LOC116976851	COX16
1532	Cox18	LOC116979736	COX18
1533	Cox19	LOC116985657	COX19
1534	Cox20	LOC116976212	COX20
1535	Cox4i1	LOC116982556	COX4I1
1536	Cox5a	LOC116968362	COX5A
1537	Cox6a1	LOC116987540	COX6A1
1538	Cox6c	LOC116971812	COX6C
1539	Cox7a2	LOC116976347	COX7A2
1540	Cox7a2l	LOC116976068	COX7A2L
1541	Cox7b	LOC116979214	COX7B
1542	Cox7c	LOC116970756	COX7C
1543	Cpa2	LOC116984893	CPA2
1544	Cpa6	cpa6	CPA6
1545	Cpb2	cpb2	CPB2
1546	Cpd	cpd	CPD
1547	Cpe	cpe	CPE
1548	Cpeb1	cpeb1	CPEB1
1549	Cpeb2	cpeb2	CPEB2
1550	Cpeb3	cpeb3	CPEB3
1551	Cpeb4	cpeb4	CPEB4
1552	Cped1	cped1	CPED1
1553	Cplane2	cplane2	CPLANE2
1554	Cplx1	cplx1	CPLX1
1555	Cplx3	LOC116989707	CPLX3
1556	Cpn1	cpn1	CPN1
1557	Cpne2	cpne2	CPNE2
1558	Cpne4	cpne4	CPNE4
1559	Cpne7	cpne7	CPNE7
1560	Cpne8	cpne8	CPNE8
1561	Cpped1	cpped1	CPPED1
1562	Cpsf2	cpsf2	CPSF2
1563	Cpsf3	cpsf3	CPSF3
1564	Cpsf4	cpsf4	CPSF4
1565	Cpsf6	cpsf6	CPSF6
1566	Cpsf7	cpsf7	CPSF7
1567	Cpt1a	LOC116967098	CPT1A
1568	Cpt2	cpt2	CPT2
1569	Cpz	cpz	CPZ
1570	Crabp1	crabp1	CRABP-I
1571	C530008M17Rik	cracd	CRACD
1572	Cracr2b	LOC116984793	CRACR2B
1573	Cramp1l	cramp1	CRAMP1
1574	Crat	crat	CRAT
1575	Crbn	crbn	CRBN
1576	Crcp	crcp	CRCP
1577	Creb1	creb1	CREB1
1578	Creb3l1	creb3l1	CREB3L1
1579	Creb3l2	creb3l2	CREB3L2
1580	Creb3l3	creb3l3	CREB3L3
1581	Creb5	creb5	CREB5
1582	Crebl2	crebl2	CREBL2
1583	Crebrf	crebrf	CREBRF
1584	Creg1	creg1	CREG1
1585	Creld1	creld1	CRELD1
1586	Crem	crem	CREM
1587	Crh	ucn	CRH
1588	Crhbp	crhbp	CRHBP
1589	Crhr2	LOC116972536	CRHR2
1590	Crim1	crim1	CRIM1
1591	Crip1	crip1	CRIP1
1592	Crip2	LOC116976739	CRIP2
1593	Cript	cript	CRIPT
1594	Crispld1	crispld1	CRISPLD1
1595	Crispld2	crispld2	CRISPLD2
1596	Crk	crk	CRK
1597	Crkl	crkl	CRKL
1598	Crlf1	crlf1	CRLF1
1599	Crlf3	crlf3	CRLF3
1600	Crls1	crls1	CRLS1
1601	Crmp1	crmp1	CRMP1
1602	Crnkl1	crnkl1	CRNKL1
1603	Crot	crot	CROT
1604	Crppa	crppa	CRPPA
1605	Crtac1	crtac1	CRTAC1
1606	Crtam	crtam	CRTAM
1607	Crtap	crtap	CRTAP
1608	Crtc1	crtc1	CRTC1
1609	Cry1	cry1	CRY1
1610	Cryab	cryab	CRYAB
1611	Cryba1	cryba1	CRYBA1
1612	Cryba4	cryba4	CRYBA4
1613	Crybb1	LOC116987616	CRYBB1
1614	Crybb2	crybb2	CRYBB2
1615	Crybb3	LOC116987390	CRYBB3
1616	Crygn	crygn	CRYGN
1617	Cryl1	cryl1	CRYL1
1618	Cryzl1	cryzl1	CRYZL1
1619	Csad	LOC116968823	CSAD
1620	Csdc2	csdc2	CSDC2
1621	Csde1	csde1	CSDE1
1622	Cse1l	cse1l	CSE1L
1623	Csgalnact1	csgalnact1	CSGALNACT1
1624	Csk	csk	CSK
1625	Csnk1a1	csnk1a1	CSNK1A1
1626	Csnk1d	csnk1d	CSNK1D
1627	Csnk1e	csnk1e	CSNK1E
1628	Csnk1g1	LOC116968252	CSNK1G1
1629	Csnk2a1	csnk2a1	CSNK2A1
1630	Csnk2a2	csnk2a2	CSNK2A2
1631	Cspg5	cspg5	CSPG5
1632	Csrnp1	csrnp1	CSRNP1
1633	Csrnp2	csrnp2	CSRNP2
1634	Csrnp3	csrnp3	CSRNP3
1635	Csrp1	csrp1	CSRP1
1636	Csrp3	csrp3	CSRP3
1637	Cst7	LOC116975838	CST7
1638	Cstf1	cstf1	CSTF1
1639	Cstf2	cstf2	CSTF2
1640	Cstf3	cstf3	CSTF3
1641	Otor	otor	CTAGE1
1642	Ctbp1	ctbp1	CTBP1
1643	Ctbp2	ctbp2	CTBP2
1644	Ctbs	LOC116978067	CTBS
1645	Ctcf	ctcf	CTCF
1646	Ctdp1	ctdp1	CTDP1
1647	Ctdspl	ctdspl	CTDSPL
1648	Ctdspl2	ctdspl2	CTDSPL2
1649	Cth	cth	CTH
1650	Cthrc1	cthrc1	CTHRC1
1651	Ctnna3	ctnna3	CTNNA3
1652	Ctnnal1	ctnnal1	CTNNAL1
1653	Ctnnb1	ctnnb1	CTNNB1
1654	Ctnnbip1	ctnnbip1	CTNNBIP1
1655	Ctnnbl1	ctnnbl1	CTNNBL1
1656	Ctns	LOC116989319	CTNS
1657	Ctr9	ctr9	CTR9
1658	Ctsa	ctsa	CTSA
1659	Ctsc	ctsc	CTSC
1660	Ctse	LOC116986639	CTSE
1661	Ctsh	ctsh	CTSH
1662	Ctso	ctso	CTSO
1663	Ctsl	ctsl	CTSV
1664	Ctsz	ctsz	CTSZ
1665	Cttn	cttn	CTTN
1666	Cttnbp2	cttnbp2	CTTNBP2
1667	Cttnbp2nl	cttnbp2nl	CTTNBP2NL
1668	Ctu2	ctu2	CTU2
1669	Ctxn1	ctxn1	CTXN1
1670	Ctxn2	ctxn2	CTXN2
1671	Ctxn3	ctxn3	CTXN3
1672	Cubn	cubn	CUBN
1673	Cuedc1	cuedc1	CUEDC1
1674	Cuedc2	cuedc2	CUEDC2
1675	Cul1	cul1	CUL1
1676	Cul2	cul2	CUL2
1677	Cul3	cul3	CUL3
1678	Cul5	cul5	CUL5
1679	Cutc	cutc	CUTC
1680	Cux1	cux1	CUX1
1681	Cwc15	cwc15	CWC15
1682	Cwc25	cwc25	CWC25
1683	Cwc27	cwc27	CWC27
1684	Cwf19l2	cwf19l2	CWF19L2
1685	Cwh43	LOC116969814	CWH43
1686	Cxcr4	cxcr4	CXCR4
1687	Cxcr5	cxcr5	CXCR5
1688	Ackr3	ackr3	CXCR7
1689	C330007P06Rik	c12hxorf56	CXorf56
1690	Cxxc4	LOC116971093	CXXC4
1691	Cxxc5	cxxc5	CXXC5
1692	Cyb561	LOC116981927	CYB561
1693	Cyb561a3	LOC116984748	CYB561A3
1694	Cyb561d2	LOC116983567	CYB561D2
1695	Cyb5b	LOC116982488	CYB5B
1696	Cyb5d2	LOC116988909	CYB5D2
1697	Cyb5r4	LOC116973647	CYB5R4
1698	Cyba	LOC116982461	CYBA
1699	Cybc1	LOC116987793	CYBC1
1700	Cybrd1	LOC116975217	CYBRD1
1701	Cyld	cyld	CYLD
1702	Cyp11a1	LOC116968174	CYP11A1
1703	Cyp17a1	LOC116981207	CYP17A1
1704	Cyp19a1	LOC116991524	CYP19A1
1705	Cyp1b1	LOC116972945	CYP1B1
1706	Cyp20a1	LOC116975411	CYP20A1
1707	Cyp26a1	LOC116981002	CYP26A1
1708	Cyp26b1	LOC116981004	CYP26B1
1709	Cyp2u1	LOC116978268	CYP2U1
1710	Cyp39a1	LOC116973346	CYP39A1
1711	Cyp4v3	LOC116978521	CYP4V2
1712	Cyp51	LOC116966341	CYP51A1
1713	Cyp7a1	LOC116972285	CYP7A1
1714	Cyp7b1	LOC116972309	CYP7B1
1715	Ccn1	ccn1	CYR61
1716	Fam49b	cyrib	CYRIB
1717	Cysltr1	cysltr1	CYSLTR1
1718	Cyth1	cyth1	CYTH1
1719	Cyth3	cyth3	CYTH3
1720	Cytip	cytip	CYTIP
1721	Cytl1	cytl1	CYTL1
1722	D2hgdh	d2hgdh	D2HGDH
1723	Dab2	dab2	DAB2
1724	Dach1	dach1	DACH1
1725	Dach2	dach2	DACH2
1726	Dact1	dact1	DACT1
1727	Dact2	dact2	DACT2
1728	Dad1	dad1	DAD1
1729	Dag1	dag1	DAG1
1730	Dagla	dagla	DAGLA
1731	Daglb	daglb	DAGLB
1732	Dalrd3	dalrd3	DALRD3
1733	Dao	dao	DAO
1734	Dapk1	dapk1	DAPK1
1735	Dapk2	dapk2	DAPK2
1736	Dapp1	dapp1	DAPP1
1737	Dars	dars1	DARS
1738	Dars2	dars2	DARS2
1739	Daw1	daw1	DAW1
1740	Dazap1	dazap1	DAZAP1
1741	Dbf4	dbf4	DBF4
1742	Dbh	dbh	DBH
1743	Dbi	dbi	DBI
1744	Dbn1	dbn1	DBN1
1745	Dbr1	dbr1	DBR1
1746	Dbt	dbt	DBT
1747	Dbx2	dbx2	DBX2
1748	Dcaf1	dcaf1	DCAF1
1749	Dcaf10	dcaf10	DCAF10
1750	Dcaf12	dcaf12	DCAF12L2
1751	Dcaf13	dcaf13	DCAF13
1752	Dcaf15	dcaf15	DCAF15
1753	Dcaf17	dcaf17	DCAF17
1754	Dcaf5	dcaf5	DCAF5
1755	Dcaf7	dcaf7	DCAF7
1756	Dcakd	dcakd	DCAKD
1757	Dcbld2	dcbld2	DCBLD2
1758	Dcdc2a	dcdc2	DCDC2
1759	Dclk1	dclk1	DCLK1
1760	Dclk2	dclk2	DCLK2
1761	Dclre1a	dclre1a	DCLRE1A
1762	Dclre1c	dclre1c	DCLRE1C
1763	Dcn	dcn	DCN
1764	Dcp1a	dcp1a	DCP1A
1765	Dcp1b	dcp1b	DCP1B
1766	Dcp2	dcp2	DCP2
1767	Dcps	dcps	DCPS
1768	Dct	dct	DCT
1769	Dctd	LOC116971616	DCTD
1770	Dctn3	dctn3	DCTN3
1771	Dctn4	dctn4	DCTN4
1772	Dctn5	dctn5	DCTN5
1773	Dctn6	dctn6	DCTN6
1774	Dcun1d1	dcun1d1	DCUN1D1
1775	Dcun1d3	dcun1d3	DCUN1D3
1776	Dcun1d4	dcun1d4	DCUN1D4
1777	Dcun1d5	dcun1d5	DCUN1D5
1778	Dcxr	dcxr	DCXR
1779	Dda1	dda1	DDA1
1780	Ddah1	ddah1	DDAH1
1781	Ddb1	ddb1	DDB1
1782	Ddhd1	ddhd1	DDHD1
1783	Ddhd2	ddhd2	DDHD2
1784	Ddit4	ddit4	DDIT4
1785	Ddost	ddost	DDOST
1786	Ddr2	ddr2	DDR2
1787	Ddrgk1	ddrgk1	DDRGK1
1788	Ddt	ddt	DDTL
1789	Ddx1	ddx1	DDX1
1790	Ddx10	ddx10	DDX10
1791	Ddx11	ddx11	DDX11
1792	Ddx17	ddx17	DDX17
1793	Ddx18	ddx18	DDX18
1794	Ddx20	ddx20	DDX20
1795	Ddx24	ddx24	DDX24
1796	Ddx27	ddx27	DDX27
1797	Ddx28	ddx28	DDX28
1798	Ddx31	ddx31	DDX31
1799	D1Pas1	ddx3x	DDX3X
1800	Ddx4	ddx4	DDX4
1801	Ddx41	ddx41	DDX41
1802	Ddx42	ddx42	DDX42
1803	Ddx46	ddx46	DDX46
1804	Ddx47	ddx47	DDX47
1805	Ddx49	ddx49	DDX49
1806	Ddx5	ddx5	DDX5
1807	Ddx51	ddx51	DDX51
1808	Ddx52	ddx52	DDX52
1809	Ddx54	ddx54	DDX54
1810	Ddx55	ddx55	DDX55
1811	Ddx59	ddx59	DDX59
1812	Ddx6	ddx6	DDX6
1813	Deaf1	LOC116984477	DEAF1
1814	Decr1	decr1	DECR1
1815	Decr2	decr2	DECR2
1816	Dedd	dedd	DEDD
1817	Def6	def6	DEF6
1818	Def8	def8	DEF8
1819	Degs1	degs1	DEGS1
1820	Degs2	degs2	DEGS2
1821	Dek	dek	DEK
1822	Dennd11	dennd11	DENND11
1823	Dennd1a	dennd1a	DENND1A
1824	Dennd1b	dennd1b	DENND1B
1825	Dennd2a	dennd2a	DENND2A
1826	Denn2b	dennd2b	DENND2B
1827	Dennd2c	dennd2c	DENND2C
1828	Dennd2d	dennd2d	DENND2D
1829	Dennd3	dennd3	DENND3
1830	Dennd6a	dennd6a	DENND6A
1831	Dennd6b	dennd6b	DENND6B
1832	Denr	denr	DENR
1833	Depdc1a	depdc1	DEPDC1
1834	Depdc1b	depdc1b	DEPDC1B
1835	Deptor	deptor	DEPDC6
1836	Depdc7	depdc7	DEPDC7
1837	Dera	dera	DERA
1838	Derl1	derl1	DERL1
1839	Derl2	derl2	DERL2
1840	Desi1	desi1	DESI1
1841	Desi2	desi2	DESI2
1842	Deup1	deup1	DEUP1
1843	Dexi	dexi	DEXI
1844	Dffa	dffa	DFFA
1845	Dffb	dffb	DFFB
1846	Gsdme	gsdme	DFNA5
1847	Dgcr6	LOC116987622	DGCR6
1848	Dgcr8	dgcr8	DGCR8
1849	Dgkq	dgkq	DGKQ
1850	Dglucy	dglucy	DGLUCY
1851	Dhcr24	dhcr24	DHCR24
1852	Dhcr7	dhcr7	DHCR7
1853	Dhdds	dhdds	DHDDS
1854	Dhfr	dhfr	DHFR
1855	Dhodh	dhodh	DHODH
1856	Dhrs11	dhrs11	DHRS11
1857	Dhrs3	dhrs3	DHRS3
1858	Dhrs4	LOC116987218	DHRS4
1859	Dhrs7	dhrs7	DHRS7
1860	Dhrs7b	dhrs7b	DHRS7B
1861	Dhrs7c	dhrs7c	DHRS7C
1862	Dhrs9	dhrs9	DHRS9
1863	Dhtkd1	dhtkd1	DHTKD1
1864	Dhx15	dhx15	DHX15
1865	Dhx29	dhx29	DHX29
1866	Dhx30	dhx30	DHX30
1867	Dhx35	dhx35	DHX35
1868	Dhx36	dhx36	DHX36
1869	Dhx37	dhx37	DHX37
1870	Dhx38	dhx38	DHX38
1871	Dhx40	dhx40	DHX40
1872	Dhx58	dhx58	DHX58
1873	Dhx8	dhx8	DHX8
1874	Diablo	diablo	DIABLO
1875	Diaph3	diaph3	DIAPH3
1876	Dicer1	dicer1	DICER1
1877	Dido1	dido1	DIDO1
1878	Utp25	utp25	DIEXF
1879	Dimt1	dimt1	DIMT1
1880	Dio1	dio1	DIO1
1881	Dipk1a	dipk1a	DIPK1A
1882	Dipk1b	dipk1b	DIPK1B
1883	Dipk2a	dipk2a	DIPK2A
1884	Dipk2b	dipk2b	DIPK2B
1885	Diras1	LOC116989503	DIRAS1
1886	Diras2	diras2	DIRAS2
1887	Dis3	dis3	DIS3
1888	Dis3l	dis3l	DIS3L
1889	Dis3l2	dis3l2	DIS3L2
1890	Disc1	disc1	DISC1
1891	Disp1	disp1	DISP1
1892	Disp3	disp3	DISP3
1893	Dixdc1	dixdc1	DIXDC1
1894	Dkc1	dkc1	DKC1
1895	Dkk1	dkk1	DKK1
1896	Dkk3	dkk3	DKK3
1897	Dlat	dlat	DLAT
1898	Dld	dld	DLD
1899	Dlec1	dlec1	DLEC1
1900	Dlg5	dlg5	DLG5
1901	Dlgap1	dlgap1	DLGAP1
1902	Dlgap2	dlgap3	DLGAP2
1903	Dlgap4	dlgap4	DLGAP4
1904	Dlk1	dlk1	DLK1
1905	Dll1	dll1	DLL1
1906	Dll4	dll4	DLL4
1907	Dlst	dlst	DLST
1908	Dlx1	dlx1	DLX1
1909	Dlx2	dlx2	DLX2
1910	Dlx3	dlx3	DLX3
1911	Dlx5	dlx5	DLX5
1912	Dlx6	dlx6	DLX6
1913	Dmap1	dmap1	DMAP1
1914	Dmbx1	dmbx1	DMBX1
1915	Dmc1	dmc1	DMC1
1916	Dmgdh	dmgdh	DMGDH
1917	Dmrt1	dmrt1	DMRT1
1918	Dmrt2	dmrt2	DMRT2
1919	Dmrt3	dmrt3	DMRT3
1920	Dmrta2	dmrta2	DMRTA2
1921	Dmrtb1	dmrtb1	DMRTB1
1922	Dmtf1	dmtf1	DMTF1
1923	Dmtn	dmtn	DMTN
1924	Dna2	dna2	DNA2
1925	Dnaaf1	dnaaf1	DNAAF1
1926	Dnaic1	dnai1	DNAI1
1927	Dnaja1	dnaja1	DNAJA1
1928	Dnaja2	dnaja2	DNAJA2
1929	Dnaja3	dnaja3	DNAJA3
1930	Dnaja4	dnaja4	DNAJA4
1931	Dnajb1	dnajb1	DNAJB1
1932	Dnajb12	dnajb12	DNAJB12
1933	Dnajb13	dnajb13	DNAJB13
1934	Dnajb14	dnajb14	DNAJB14
1935	Dnajb2	dnajb2	DNAJB2
1936	Dnajb9	dnajb9	DNAJB9
1937	Dnajc1	dnajc1	DNAJC1
1938	Dnajc10	dnajc10	DNAJC10
1939	Dnajc11	dnajc11	DNAJC11
1940	Dnajc12	dnajc12	DNAJC12
1941	Dnajc13	dnajc13	DNAJC13
1942	Dnajc16	dnajc16	DNAJC16
1943	Dnajc17	dnajc17	DNAJC17
1944	Dnajc18	dnajc18	DNAJC18
1945	Dnajc19	dnajc19	DNAJC19
1946	Dnajc2	dnajc2	DNAJC2
1947	Dnajc22	dnajc22	DNAJC22
1948	Dnajc24	dnajc24	DNAJC24
1949	Dnajc27	dnajc27	DNAJC27
1950	Dnajc28	dnajc28	DNAJC28
1951	Dnajc3	dnajc3	DNAJC3
1952	Dnajc30	dnajc30	DNAJC30
1953	Dnajc5	dnajc5	DNAJC5
1954	Dnajc6	dnajc6	DNAJC6
1955	Dnajc7	dnajc7	DNAJC7
1956	Dnajc8	dnajc8	DNAJC8
1957	Dnajc9	dnajc9	DNAJC9
1958	Dnal1	dnal1	DNAL1
1959	Dnal4	dnal4	DNAL4
1960	Dnase1l3	dnase1l3	DNASE1L3
1961	Dnase2b	dnase2b	DNASE2B
1962	Dnd1	dnd1	DND1
1963	Dner	dner	DNER
1964	Dnlz	dnlz	DNLZ
1965	Dnm1l	dnm1l	DNM1L
1966	Dnmbp	dnmbp	DNMBP
1967	Dnmt1	dnmt1	DNMT1
1968	Dnmt3a	dnmt3a	DNMT3A
1969	Dntt	dntt	DNTT
1970	Doc2b	doc2b	DOC2B
1971	Dohh	dohh	DOHH
1972	Dok1	dok1	DOK1
1973	Dok2	dok2	DOK2
1974	Dok4	dok4	DOK4
1975	Dok5	dok5	DOK5
1976	Dok7	dok7	DOK7
1977	Dolk	dolk	DOLK
1978	Dolpp1	dolpp1	DOLPP1
1979	Donson	donson	DONSON
1980	Dot1l	dot1l	DOT1L
1981	Dpagt1	dpagt1	DPAGT1
1982	Gm17018	dpcd	DPCD
1983	Dpep1	dpep1	DPEP1
1984	Dpf3	dpf3	DPF3
1985	Dph1	dph1	DPH1
1986	Dph2	dph2	DPH2
1987	Dph3	dph3	DPH3P1
1988	Dph5	dph5	DPH5
1989	Dph6	dph6	DPH6
1990	Dph7	dph7	DPH7
1991	Dpm2	dpm2	DPM2
1992	Dpp10	dpp10	DPP10
1993	Dpp4	LOC116975274	DPP4
1994	Dpp6	dpp6	DPP6
1995	Dpp7	dpp7	DPP7
1996	Dpt	dpt	DPT
1997	Dpy19l3	dpy19l3	DPY19L3
1998	Dpy30	dpy30	DPY30
1999	Dpyd	dpyd	DPYD
[truncated: 7,254 more rows]
