# Supplementary material for: Little skate genome provides insights into genetic programs essential for limb-based locomotion
Source: eLife. 2022 Oct 26;11:e78345. doi: 10.7554/eLife.78345 (PMC9605692; doi:10.7554/eLife.78345)
Supplement: Supplementary file 2. — The DEG results for little skate (pec-MN vs tail-SC) and chick (br-MN vs ce-SC) MNs. [file elife-78345-supp2.xlsx]

## Sheet: Little Skate
GeneId	GeneSymbol	baseMean	log2FoldChange	pvalue	padj
LEUER_G0001351	hoxa11	2873.04	-14.9329	4.14179e-21	3.36355e-17
LEUER_G0001128	col1a2	1596.62	-14.0853	1.43303e-19	5.81881e-16
LEUER_G0007417	LOC116979194	751.251	-12.9979	2.62229e-14	7.09854e-11
LEUER_G0001352	hoxa10	490.571	-9.90897	3.44904e-12	7.00242e-09
LEUER_G0015636	cgnl1	476.284	-10.4696	1.01707e-11	1.65192e-08
LEUER_G0015005	adamtsl2	410.292	-12.1249	3.6278e-11	4.91023e-08
LEUER_G0006544	tie1	403.445	-11.1382	4.78494e-11	5.55121e-08
LEUER_G0004596	hoxd10	345.343	-11.8761	6.31965e-11	6.41523e-08
LEUER_G0000301	lef1	523.214	-11.5132	8.98589e-11	8.10827e-08
LEUER_G0015463	ets1	317.833	-10.7945	4.08321e-10	3.31598e-07
LEUER_G0012903	aplnr	318.957	-11.7622	6.12986e-10	4.42534e-07
LEUER_G0004598	hoxd12	341.499	-10.8981	6.75191e-10	4.42534e-07
LEUER_G0007243	LOC116978999	509.757	-12.438	7.67836e-10	4.42534e-07
LEUER_G0005936	nid2	238.341	-11.3418	8.19671e-10	4.42534e-07
LEUER_G0009526	pkd1l2	611.979	-9.07148	8.61281e-10	4.42534e-07
LEUER_G0013146	timp2	508.497	-7.25405	8.7188e-10	4.42534e-07
LEUER_G0008610	tcerg1l	271.716	-11.5301	9.80062e-10	4.68181e-07
LEUER_G0009269	arl4d	254.545	-11.4361	1.9192e-09	8.6588e-07
LEUER_G0010769	mpped2	507.82	-7.26135	2.14228e-09	9.15657e-07
LEUER_G0002689	eya1	488.79	9.32814	2.99464e-09	1.21597e-06
LEUER_G0006415	tal1	322.183	-11.7759	3.16666e-09	1.22459e-06
LEUER_G0006871	afap1l1	368.023	-11.9684	4.50514e-09	1.61034e-06
LEUER_G0009989	dnah1	300.007	-11.673	4.56074e-09	1.61034e-06
LEUER_G0011417	myh11	224.813	-11.2574	8.05632e-09	2.72606e-06
LEUER_G0016899	LOC116967855	1028.92	-7.10624	9.89327e-09	3.21373e-06
LEUER_G0005492	cd93	169.834	-10.8526	1.3311e-08	4.15764e-06
LEUER_G0010004	terf2ip	344.462	-10.9099	1.53082e-08	4.60435e-06
LEUER_G0004913	LOC116975564	166.834	-10.8271	1.91176e-08	5.5448e-06
LEUER_G0004195	flt1	279.465	-11.5715	3.23627e-08	8.79515e-06
LEUER_G0016179	ldb3	157.52	-10.744	3.24904e-08	8.79515e-06
LEUER_G0006190	crb1	327.06	-11.798	3.57276e-08	9.35948e-06
LEUER_G0005400	myct1	533.292	-11.5412	3.70951e-08	9.41404e-06
LEUER_G0004909	mras	2878.38	5.27685	4.56183e-08	1.12262e-05
LEUER_G0009278	LOC116982009	410.178	-6.24766	5.71787e-08	1.36573e-05
LEUER_G0000305	dkk2	260.146	-11.4674	6.10091e-08	1.41558e-05
LEUER_G0010415	LOC116983845	165.454	-10.8154	6.35602e-08	1.43381e-05
LEUER_G0004396	shox	280.836	-11.578	8.95078e-08	1.96458e-05
LEUER_G0017460	tns2	391.731	-9.23259	9.69226e-08	2.02819e-05
LEUER_G0002090	adamts3	253.636	-9.60441	9.74009e-08	2.02819e-05
LEUER_G0009348	ngfr	8763.09	6.4914	1.00646e-07	2.04337e-05
LEUER_G0009788	irx6	153.552	9.91603	1.16933e-07	2.31612e-05
LEUER_G0016680	antxr1	146.089	-10.6348	1.22683e-07	2.37216e-05
LEUER_G0016138	gdf10	170.188	-10.8555	2.15315e-07	4.03657e-05
LEUER_G0000652	ddx4	333.504	-8.65423	2.18704e-07	4.03657e-05
LEUER_G0009729	cpne2	142.723	-10.6022	2.31624e-07	4.18004e-05
LEUER_G0001924	anxa1	682.296	5.99299	3.32011e-07	5.86143e-05
LEUER_G0009541	wfdc1	142.808	-10.6024	3.76046e-07	6.38973e-05
LEUER_G0011222	ndufa9	192.798	9.68605	3.8195e-07	6.38973e-05
LEUER_G0002922	ptprm	125.679	-10.4185	3.8554e-07	6.38973e-05
LEUER_G0008764	LOC116981222	349.578	-9.06954	4.35529e-07	7.07385e-05
LEUER_G0009932	foxp1	2644.46	4.94673	4.53994e-07	7.22919e-05
LEUER_G0001354	hoxa7	938.51	5.20315	4.80415e-07	7.5028e-05
LEUER_G0014127	adamtsl5	139.522	10.7762	4.91644e-07	7.53329e-05
LEUER_G0008806	fgf8	223.394	-11.2476	5.06127e-07	7.61159e-05
LEUER_G0009938	gxylt2	305.914	8.03746	8.34454e-07	0.000123211
LEUER_G0009319	col1a1	2495.98	-6.41816	8.80416e-07	0.000125838
LEUER_G0011718	LOC116985895	207.307	8.95501	8.83236e-07	0.000125838
LEUER_G0001350	hoxa13	133.227	-10.5023	1.05007e-06	0.000147028
LEUER_G0016540	pdgfb	336.856	-8.66978	1.11503e-06	0.000153477
LEUER_G0007038	LOC116978642	3332.93	4.51005	1.17784e-06	0.000159421
LEUER_G0009930	mdfic2	224.168	7.97578	1.20067e-06	0.000159847
LEUER_G0006361	LOC116977716	1726.16	4.78685	1.26681e-06	0.000165932
LEUER_G0010617	lin7a	726.985	-6.44616	1.44435e-06	0.000186184
LEUER_G0015768	colgalt1	290.298	-7.69936	1.49294e-06	0.00018944
LEUER_G0009346	LOC116982077	200.889	9.76031	1.60099e-06	0.000200025
LEUER_G0017177	isl2	126.325	10.633	1.91189e-06	0.00023525
LEUER_G0007836	cldn11	121.861	-10.3741	2.02064e-06	0.00024492
LEUER_G0011963	dok5	127.18	9.08702	2.29611e-06	0.000274216
LEUER_G0010904	sdhaf2	257.647	7.91179	2.36947e-06	0.000278876
LEUER_G0017716	dnah2	101.495	-10.1098	2.48985e-06	0.000287703
LEUER_G0004299	zic2	100.058	-10.0893	2.51532e-06	0.000287703
LEUER_G0016177	mmrn2	315.068	-9.92511	2.57718e-06	0.000290685
LEUER_G0000773	arid3c	122.425	-10.3796	2.61819e-06	0.000291264
LEUER_G0014284	LOC116989472	661.335	5.1764	2.79837e-06	0.00030556
LEUER_G0013588	fhl3	190.985	-11.0222	2.82194e-06	0.00030556
LEUER_G0005348	arv1	105.896	10.3784	3.43123e-06	0.000366645
LEUER_G0011270	armc10	126.378	-9.46269	4.07469e-06	0.000429748
LEUER_G0016404	nol12	404.058	5.97739	4.20757e-06	0.000438072
LEUER_G0014980	LOC116990707	266.245	-7.35498	4.54586e-06	0.000467303
LEUER_G0005820	nubpl	163.332	-7.97554	5.359e-06	0.000544005
LEUER_G0010024	rft1	124.818	9.60689	5.53729e-06	0.000555164
LEUER_G0008841	pkd2l1	98.521	-10.0663	5.99284e-06	0.00059351
LEUER_G0006767	LOC116978297	930.613	-6.32598	6.38425e-06	0.000618075
LEUER_G0000579	kdr	344.943	-8.74364	6.46202e-06	0.000618075
LEUER_G0005399	col12a1	544.435	-6.63372	6.4692e-06	0.000618075
LEUER_G0009242	LOC116981972	158.591	10.961	6.90929e-06	0.000652446
LEUER_G0006940	pdgfrb	210.527	-7.75262	7.09394e-06	0.000658349
LEUER_G0016029	LOC116966387	189.957	-11.0137	7.13394e-06	0.000658349
LEUER_G0004871	lrp1b	3190.22	6.17583	8.52545e-06	0.000777923
LEUER_G0009716	ldhd	187.439	10.2728	9.13421e-06	0.000824211
LEUER_G0011123	LOC116985066	425.988	8.17272	9.44041e-06	0.000842479
LEUER_G0016651	loxl2	1082.76	-5.61736	1.02432e-05	0.000893956
LEUER_G0011669	hs3st2	104.43	10.3584	1.0322e-05	0.000893956
LEUER_G0006798	LOC116978326	482.29	4.53997	1.03475e-05	0.000893956
LEUER_G0006741	LOC116978272	743.172	7.37746	1.06566e-05	0.000910968
LEUER_G0007208	nrk	127.59	-8.60634	1.11603e-05	0.00094409
LEUER_G0004926	cfap65	92.5975	-9.97773	1.21677e-05	0.0010187
LEUER_G0005993	zc2hc1c	171.661	-7.7257	1.22997e-05	0.00101925
LEUER_G0012871	triap1	221.267	-6.2272	1.26207e-05	0.00103528
LEUER_G0004742	col6a2	84.5762	-9.84705	1.48652e-05	0.00119956
LEUER_G0011924	ada	85.3788	-9.85977	1.49187e-05	0.00119956
LEUER_G0010532	dcn	85.4175	-9.8604	1.54517e-05	0.00123023
LEUER_G0010839	LOC116984662	127.549	-9.47484	1.58797e-05	0.00125203
LEUER_G0000832	skor2	100.486	-9.13067	1.62991e-05	0.00127274
LEUER_G0001740	armc4	93.208	-9.98645	1.72085e-05	0.00133095
LEUER_G0007616	bche	128.327	10.6557	2.1095e-05	0.00161004
LEUER_G0009424	kiaa0513	116.336	-9.3421	2.12134e-05	0.00161004
LEUER_G0007771	sox14	170.02	-9.89129	2.36279e-05	0.00177669
LEUER_G0000369	ndnf	110.334	-8.40682	2.73977e-05	0.00204126
LEUER_G0004450	etv5	216.028	6.65202	2.89898e-05	0.00214024
LEUER_G0002120	tal2	90.8878	-9.95039	2.92957e-05	0.00214334
LEUER_G0010800	irag1	219.182	-7.25579	3.3306e-05	0.00241498
LEUER_G0002172	ugcg	143.199	-6.44193	3.73922e-05	0.00268727
LEUER_G0010122	sema3f	76.2576	-9.69677	3.9306e-05	0.00280003
LEUER_G0010661	met	666.523	6.33398	4.23757e-05	0.00297513
LEUER_G0012770	LOC116987431	128.696	-10.4519	4.24966e-05	0.00297513
LEUER_G0010808	c20h11orf96	118.045	-10.3281	4.44844e-05	0.00308674
LEUER_G0016797	LOC116967365	81.5276	-8.82946	4.4851e-05	0.00308674
LEUER_G0016176	sncg	1130.34	3.63896	4.55578e-05	0.00310903
LEUER_G0005305	LOC116976163	97.2973	-9.08566	5.3074e-05	0.00359178
LEUER_G0005514	snap25	90.5565	-8.06626	5.42104e-05	0.00363837
LEUER_G0010196	timp4	81.7991	-9.79906	5.49895e-05	0.00366041
LEUER_G0001353	hoxa9	1198.07	-3.74668	5.90514e-05	0.00389883
LEUER_G0008978	LOC116981522	280.222	6.01833	6.00542e-05	0.00393306
LEUER_G0013554	c27h1orf216	93.2628	9.1797	6.13126e-05	0.00398336
LEUER_G0014821	plekhg5	120.791	-10.3609	6.22066e-05	0.00400936
LEUER_G0011261	rsbn1l	272.274	6.38454	6.36432e-05	0.00406966
LEUER_G0005987	erg28	104.884	7.69431	6.50164e-05	0.00412499
LEUER_G0002286	LOC116971348	70.6902	-9.58743	6.90067e-05	0.00434421
LEUER_G0014513	LOC116990102	106.485	10.3865	8.05552e-05	0.00503222
LEUER_G0007686	ecel1	789.845	4.0058	8.17299e-05	0.00504209
LEUER_G0009118	LOC116981820	67.8174	-9.5286	8.1955e-05	0.00504209
LEUER_G0008372	LOC116980661	109.119	-9.24964	8.45477e-05	0.00516249
LEUER_G0015970	LOC116991874	77.8572	-8.76184	8.52625e-05	0.00516729
LEUER_G0005091	dtl	78.767	-9.74358	8.63045e-05	0.00518102
LEUER_G0009565	LOC116982566	108.842	-10.2112	8.6765e-05	0.00518102
LEUER_G0002456	vegfc	110.927	-10.2375	8.87269e-05	0.0052595
LEUER_G0017871	chrnb3	151.592	-6.69019	9.44992e-05	0.00556107
LEUER_G0014933	p3h1	256.068	-5.57698	0.000104753	0.00612013
LEUER_G0009543	meak7	403.663	-5.56539	0.000108527	0.00629535
LEUER_G0012307	grm4	210.16	-8.01747	0.000112657	0.00648855
LEUER_G0016642	adam9	75.0346	8.35053	0.000118103	0.00675431
LEUER_G0004328	sox1	109.017	-10.2124	0.000125992	0.00715513
LEUER_G0014433	LOC116989647	111.808	-10.2488	0.000127226	0.00717501
LEUER_G0005802	actc1	102.928	-10.1299	0.000143652	0.00804549
LEUER_G0016048	LOC116966586	613.078	5.58609	0.000149054	0.00829086
LEUER_G0006178	lrrc39	251.494	-5.19591	0.000169229	0.00933228
LEUER_G0001263	thsd7a	482.174	-4.55151	0.000170075	0.00933228
LEUER_G0007024	atox1	355.934	4.95536	0.000174241	0.00949672
LEUER_G0009078	fbxl20	80.7973	-8.81488	0.00018044	0.009769
LEUER_G0006210	LOC116977518	58.4104	-9.31275	0.000182936	0.00983858
LEUER_G0015162	LOC116990905	762.308	-5.0246	0.000185838	0.00992889
LEUER_G0005941	trim9	186.801	-5.69336	0.000192522	0.0102188
LEUER_G0014340	kxd1	129.667	8.03177	0.00020077	0.0105873
LEUER_G0011969	fam210b	158.236	8.65794	0.000205577	0.0107709
LEUER_G0009337	hrob	487.341	-6.34077	0.000206965	0.0107741
LEUER_G0000681	esm1	71.1156	-9.59707	0.000217786	0.0112376
LEUER_G0005655	plekhd1	87.9707	-9.90386	0.000218635	0.0112376
LEUER_G0015972	LOC116991815	117.851	-7.91325	0.000223872	0.0114344
LEUER_G0001239	jcad	104.253	-9.18509	0.000225963	0.0114691
LEUER_G0012069	cbfa2t2	1102.52	-5.36739	0.00022934	0.0115681
LEUER_G0004355	lipt1	83.4982	10.0355	0.000232408	0.0116505
LEUER_G0002008	fbn2	165.879	-7.53663	0.000244857	0.0121423
LEUER_G0012930	acacb	170.052	-5.85536	0.000245208	0.0121423
LEUER_G0004084	gpr45	167.855	5.60529	0.000246742	0.0121442
LEUER_G0010561	ppm1h	198.407	-5.80397	0.000256467	0.0125208
LEUER_G0011731	lfng	113.437	-7.13284	0.000257478	0.0125208
LEUER_G0011433	dcun1d3	528.031	-5.70392	0.00026025	0.0125803
LEUER_G0005640	LOC116976724	86.0282	-9.87183	0.000263051	0.0126404
LEUER_G0011615	grid2ip	198.184	-5.92286	0.000280899	0.0134187
LEUER_G0005994	gpatch2l	57.1537	-9.28173	0.000286548	0.0135765
LEUER_G0008436	arhgap31	63.2073	-9.42717	0.000287546	0.0135765
LEUER_G0006600	barhl2	150.605	-5.90877	0.000301643	0.0141598
LEUER_G0005147	ndufaf7	134.817	5.70623	0.000303753	0.0141769
LEUER_G0002267	rcl1	508.114	-5.29573	0.000315407	0.0146367
LEUER_G0007627	slc66a1l	52.2711	9.35976	0.000339916	0.0156844
LEUER_G0006968	LOC116978562	78.7475	9.95096	0.000347212	0.0159306
LEUER_G0008796	r3hcc1l	264.939	-5.80286	0.000355862	0.0161279
LEUER_G0002147	gda	62.2011	-8.43789	0.000356912	0.0161279
LEUER_G0003725	rbm34	275.429	5.2598	0.00035747	0.0161279
LEUER_G0009910	adamts9	95.4355	-9.05716	0.000367531	0.0164902
LEUER_G0014252	slc25a42	360.47	-5.90684	0.000370288	0.0165226
LEUER_G0004307	LOC116974536	86.2135	-9.87374	0.000386998	0.0171738
LEUER_G0011644	uncx	437.032	-4.85521	0.000395716	0.0174653
LEUER_G0003771	khdrbs2	127.182	-5.8851	0.000411026	0.0180429
LEUER_G0003192	dnah14	85.4977	-9.8617	0.000415294	0.0181323
LEUER_G0000627	rnf180	62.5643	-8.44551	0.000418878	0.018191
LEUER_G0011174	LOC116985133	344.029	-5.01754	0.000439806	0.0189654
LEUER_G0010893	rab3il1	157.306	-5.35507	0.000443257	0.0189654
LEUER_G0002579	col14a1	141.701	-6.43917	0.000443718	0.0189654
LEUER_G0002833	adcy8	183.388	-5.73831	0.000456096	0.0193924
LEUER_G0011120	rassf8	213.957	6.84086	0.000462668	0.0195694
LEUER_G0014527	LOC116989940	92.7068	9.16177	0.000468071	0.0196954
LEUER_G0002415	ptcd2	97.122	6.46281	0.000472996	0.0198
LEUER_G0002369	ap3b1	248.496	-5.46976	0.000483429	0.0201329
LEUER_G0011285	dennd6b	784.667	4.50542	0.000496484	0.020486
LEUER_G0007920	LOC116979937	1258.61	-5.17395	0.000496951	0.020486
LEUER_G0009759	tsnaxip1	75.2062	-9.67759	0.000500753	0.020518
LEUER_G0008637	nkx1-2	56.9713	-9.27585	0.000502781	0.020518
LEUER_G0003157	LOC116972947	63.7211	-8.47182	0.000513793	0.0207948
LEUER_G0014065	dusp14	631.082	-5.06171	0.000514686	0.0207948
LEUER_G0009641	cmtr2	235.27	6.21707	0.000526233	0.0211561
LEUER_G0010676	LOC116984466	58.0512	-9.30368	0.00053348	0.0211813
LEUER_G0002280	mccc2	285.556	5.21973	0.000534616	0.0211813
LEUER_G0007271	pin4	280.867	5.16139	0.000537181	0.0211813
LEUER_G0014402	angptl4	296.646	-5.61572	0.000538516	0.0211813
LEUER_G0010789	tead1	862.785	-4.57367	0.000539901	0.0211813
LEUER_G0013242	LOC116988053	360.942	4.10835	0.000546714	0.0213455
LEUER_G0010029	LOC116983246	560.607	4.99912	0.000553602	0.0214201
LEUER_G0000528	uchl1	391.907	4.16998	0.000553899	0.0214201
LEUER_G0013045	shisa6	1877.28	4.60955	0.000561735	0.0216201
LEUER_G0010888	fads2	151.86	5.20543	0.000583181	0.0223397
LEUER_G0009575	maf	116.075	6.91735	0.000625533	0.0238474
LEUER_G0001318	znf385d	73.2883	-9.64018	0.000628412	0.0238474
LEUER_G0013230	eme1	52.3661	9.36258	0.000643835	0.0241639
LEUER_G0012663	cfap251	174.486	-4.79505	0.000645117	0.0241639
LEUER_G0007905	wwtr1	49.5445	-9.07486	0.000645681	0.0241639
LEUER_G0010185	rab43	208.541	-5.39878	0.000667162	0.0248533
LEUER_G0015593	LOC116991715	155.199	-7.89905	0.000682701	0.0253161
LEUER_G0012548	dyrk3	469.133	4.04014	0.000686232	0.0253313
LEUER_G0002116	frem1	48.2639	-9.03793	0.000690811	0.025385
LEUER_G0012220	LOC116986692	626.253	-3.73368	0.000718876	0.0262973
LEUER_G0015464	fli1	69.0646	-9.55496	0.000759809	0.02767
LEUER_G0000022	plk4	66.2469	-7.66168	0.00076399	0.0276981
LEUER_G0009043	mlx	226.553	-5.4165	0.000791807	0.0285789
LEUER_G0015015	col5a1	666.882	-5.15079	0.000808668	0.0290584
LEUER_G0004044	prcp	136.682	-4.65693	0.000818475	0.0292812
LEUER_G0016085	ret	2997.72	2.80985	0.000844676	0.030086
LEUER_G0007122	LOC116978855	47.5139	9.222	0.000880134	0.0312121
LEUER_G0009745	LOC116982785	67.2886	-9.51699	0.000919071	0.0323721
LEUER_G0000321	mmrn1	59.4583	-8.37279	0.000920816	0.0323721
LEUER_G0005871	psma6	182.495	4.28068	0.000932755	0.0326504
LEUER_G0013295	stx8	295.008	5.35583	0.000937545	0.0326773
LEUER_G0002413	znf366	50.1147	-8.12482	0.0009581	0.033251
LEUER_G0010500	dram1	64.3993	9.66074	0.00097906	0.0338338
LEUER_G0002219	galntl6	133.619	5.87642	0.00100274	0.0345052
LEUER_G0011812	abat	258.729	-4.25649	0.00101384	0.0346948
LEUER_G0009789	irx5	548.548	4.4609	0.00101679	0.0346948
LEUER_G0003289	LOC116973092	1043.05	3.8172	0.00105366	0.0358023
LEUER_G0013193	LOC116987999	665.962	-4.67786	0.00106587	0.0360663
LEUER_G0014134	LOC116989285	631.119	-3.62446	0.00110654	0.0372252
LEUER_G0010663	cav2	49.8064	9.2903	0.00110928	0.0372252
LEUER_G0002491	cbln2	125.718	-6.60362	0.00111785	0.0372543
LEUER_G0011541	pms2	149.963	-5.2245	0.00111933	0.0372543
LEUER_G0002281	cartpt	108.512	6.56689	0.00112782	0.0373836
LEUER_G0011407	sema3a	733.752	3.81779	0.00114958	0.0379503
LEUER_G0011516	pkd1	93.3376	-6.02833	0.00115646	0.0380229
LEUER_G0013203	LOC116988012	3515.22	-2.81726	0.0011856	0.0388237
LEUER_G0009075	LOC116981774	63.2672	-9.4281	0.00120798	0.0393978
LEUER_G0013163	LOC116987967	156.079	-6.46137	0.00122479	0.0397858
LEUER_G0013247	LOC116988061	829.805	2.9637	0.00122968	0.0397858
LEUER_G0011239	panx2	239.982	5.17587	0.00123698	0.039863
LEUER_G0003533	rhag	52.0123	-9.14594	0.00124561	0.0399825
LEUER_G0008612	ebf3	2076.56	-3.41323	0.00126122	0.0401992
LEUER_G0005756	actn1	597.679	-5.50162	0.00126226	0.0401992
LEUER_G0006662	ssx2ip	97.7013	-7.15975	0.0012692	0.0402624
LEUER_G0006915	n4bp3	89.6042	-7.43557	0.00127672	0.0403432
LEUER_G0002856	st18	552.065	-3.88025	0.00129324	0.040629
LEUER_G0007027	gfra3	645.174	4.09008	0.0012995	0.040629
LEUER_G0006740	LOC116978270	71.9619	-8.6495	0.00130077	0.040629
LEUER_G0011469	tvp23a	60.3174	9.56626	0.00131736	0.0409897
LEUER_G0007575	LOC116979559	546.337	4.24831	0.00135182	0.0417849
LEUER_G0008191	col8a1	61.1288	-9.37858	0.00135321	0.0417849
LEUER_G0012192	snta1	167.691	-5.75554	0.00135956	0.041822
LEUER_G0014372	fkbp8	161.417	-5.49952	0.00136846	0.0419368
LEUER_G0004095	slc5a7	340.514	3.4572	0.00137846	0.0420846
LEUER_G0000511	klhl5	522.588	-4.02294	0.00138592	0.0421539
LEUER_G0004388	LOC116974621	58.7927	9.52934	0.00140777	0.0425501
LEUER_G0013438	matn1	65.1428	-9.47009	0.00140943	0.0425501
LEUER_G0009911	LOC116970460	359.008	-4.2177	0.00142447	0.042845
LEUER_G0001566	LOC116966885	1018.45	-2.97076	0.00144746	0.0433756
LEUER_G0010077	hmces	326.063	-4.68688	0.00148377	0.0442116
LEUER_G0008412	tab3	1155.16	-3.40219	0.00148624	0.0442116
LEUER_G0004640	gad1	1205.37	-2.77176	0.00150891	0.044722
LEUER_G0003803	mtres1	95.0296	5.51325	0.00156765	0.0460659
LEUER_G0005828	tmem179	126.565	5.96764	0.00157158	0.0460659
LEUER_G0012099	mafb	719.668	3.21858	0.0015813	0.0460659
LEUER_G0011348	klhdc10	261.223	-3.75021	0.00158168	0.0460659
LEUER_G0012634	bri3bp	123.876	5.96787	0.00158934	0.0460659
LEUER_G0013263	evpl	87.7747	5.37944	0.00158954	0.0460659
LEUER_G0000028	fat4	597.043	-3.24478	0.00159839	0.0460659
LEUER_G0016387	LOC116967032	97.1882	-7.63673	0.00159963	0.0460659
LEUER_G0016118	LOC116966354	67.0182	-8.54599	0.00163322	0.0466214
LEUER_G0006147	LOC116971233	62.2454	-9.40446	0.00163789	0.0466214
LEUER_G0005489	foxa2	42.6308	-8.85844	0.00164058	0.0466214
LEUER_G0011390	nudt5	2226.73	-4.28137	0.00164188	0.0466214
LEUER_G0008980	LOC116981454	137.072	-5.53129	0.00166116	0.0470045
LEUER_G0000076	mab21l2	848.547	-3.04525	0.00170062	0.047954
LEUER_G0008438	b4galt4	144.657	5.80444	0.00173332	0.0487068
LEUER_G0009961	LOC116983149	453.993	3.70605	0.00176998	0.049427
LEUER_G0003388	faxc	129.802	5.4906	0.00177112	0.049427
LEUER_G0015656	bcl2a1	63.7034	7.00769	0.00180489	0.0501971
LEUER_G0017839	myadm	49.6692	-8.11207	0.00181693	0.0503593
LEUER_G0011651	sox8	161.877	-5.69686	0.00183541	0.0506986
LEUER_G0015379	dpagt1	584.141	3.61851	0.0018507	0.0509474
LEUER_G0011260	tmem60	229.395	4.29081	0.00191659	0.0525458
LEUER_G0000259	cytl1	43.3526	-8.88264	0.0019217	0.0525458
LEUER_G0008230	LOC116980492	98.7132	-5.42492	0.0019325	0.0526638
LEUER_G0004637	myo3b	40.5517	-8.78611	0.00194886	0.052932
LEUER_G0000692	isl1	759.529	3.72496	0.00197718	0.0535108
LEUER_G0009361	fzd2	883.601	3.45731	0.00198335	0.0535108
LEUER_G0000621	ppwd1	92.7199	-5.43915	0.00211446	0.0568594
LEUER_G0007139	magt1	106.433	-6.33993	0.00216379	0.0579939
LEUER_G0017374	ltbp3	242.66	-5.06914	0.00217768	0.0581742
LEUER_G0002598	eny2	48.0378	8.31014	0.00224944	0.059839
LEUER_G0006432	rnf11	831.018	4.08147	0.00225474	0.059839
LEUER_G0004912	gypc	336.142	-5.45564	0.00233778	0.0618407
LEUER_G0009180	LOC116981897	83.1582	-6.58778	0.00238964	0.0626665
LEUER_G0015707	arrdc4	241.531	-4.98486	0.00239315	0.0626665
LEUER_G0006927	flt4	341.996	-11.8623	0.00239539	0.0626665
LEUER_G0016437	LOC116966756	41.7775	-8.8293	0.00239986	0.0626665
LEUER_G0003675	rnaseh1	63.9095	-7.03855	0.00242815	0.0632018
LEUER_G0008523	ccdc58	64.6283	-8.49246	0.00246288	0.0639011
LEUER_G0015420	scn3b	383.416	3.72354	0.00248223	0.0639713
LEUER_G0001581	dcdc2	55.7987	-9.24596	0.00249408	0.0639713
LEUER_G0009119	hoxb9	508.917	-3.17065	0.00249421	0.0639713
LEUER_G0014380	med16	198.171	-6.21465	0.00249709	0.0639713
LEUER_G0004959	speg	162.876	-6.06637	0.00252288	0.0643646
LEUER_G0010344	ninj2	85.5276	7.76401	0.00253146	0.0643646
LEUER_G0008733	cfap58	59.4558	-8.37317	0.00253623	0.0643646
LEUER_G0013298	sec14l1	259.167	4.13964	0.00255273	0.0645818
LEUER_G0014064	tada2a	211.405	-5.4692	0.002603	0.0656491
LEUER_G0001652	cdyl	550.244	-5.03342	0.00262657	0.0660384
LEUER_G0010246	LOC116983517	81.4738	5.62815	0.00266701	0.066848
LEUER_G0006224	LOC116977535	56.1697	-7.43532	0.00272218	0.0680209
LEUER_G0000916	ap5s1	260.737	-4.32248	0.00273532	0.0681397
LEUER_G0009798	cyld	52.1601	-9.14965	0.00274987	0.0682926
LEUER_G0005012	tmem242	134.335	4.85349	0.00276831	0.0684106
LEUER_G0017356	ahnak	492.931	-3.127	0.00277636	0.0684106
LEUER_G0001425	LOC116990913	1131.94	2.70234	0.00277989	0.0684106
LEUER_G0001076	LOC116986042	176.405	4.69099	0.00289958	0.0711403
LEUER_G0001713	kiaa1217	57.4069	-8.32256	0.00298413	0.0729944
LEUER_G0010969	traf6	73.1294	6.1866	0.0030282	0.0738498
LEUER_G0017828	slc9a3r2	186.727	-5.75968	0.00303929	0.0738985
LEUER_G0002990	LOC116972422	43.1672	-7.90807	0.00307013	0.0741351
LEUER_G0004306	fgf14	176.58	-5.4964	0.00308271	0.0741351
LEUER_G0004651	ccdc14	38.9697	8.93595	0.00308914	0.0741351
LEUER_G0006481	rnf220	1379.57	2.92916	0.00309058	0.0741351
LEUER_G0000220	srp72	693.247	4.16476	0.00309467	0.0741351
LEUER_G0005721	bahd1	84.0551	6.60859	0.00318092	0.0759256
LEUER_G0004744	col6a1	44.8696	-7.04082	0.00318811	0.0759256
LEUER_G0000150	msmo1	38.4364	8.91607	0.00324922	0.0771271
LEUER_G0015386	LOC116991145	1279.15	2.80409	0.00325755	0.0771271
LEUER_G0017170	scamp2	264.006	4.4283	0.00328866	0.0774177
LEUER_G0017157	LOC116968280	212.647	-5.26027	0.00328889	0.0774177
LEUER_G0001507	satb1	39.3113	-8.74147	0.00331877	0.0778953
LEUER_G0017172	LOC116968311	295.806	-4.8832	0.00334586	0.0783048
LEUER_G0000104	npy1r	36.0113	-8.61526	0.00339842	0.0791441
LEUER_G0003310	tpbg	45.8994	-7.99638	0.00340122	0.0791441
LEUER_G0001993	nfil3	155.621	-3.9348	0.00351337	0.0815202
LEUER_G0008359	LOC116969753	56.4619	-8.29797	0.00352855	0.0816391
LEUER_G0001805	LOC116970535	228.988	-5.16376	0.00359917	0.0830365
LEUER_G0005412	zc2hc1b	52.0113	-9.14445	0.00369971	0.0849713
LEUER_G0009181	LOC116981898	89.7476	5.90697	0.00370396	0.0849713
LEUER_G0010468	LOC116984205	48.0622	-9.03185	0.00373883	0.0852916
LEUER_G0005773	atp6v1d	253.425	4.35689	0.00374041	0.0852916
LEUER_G0001338	scrn1	309.05	4.48579	0.00375794	0.0852916
LEUER_G0006188	lhx9	48.2159	-9.03625	0.0037668	0.0852916
LEUER_G0014904	rimkla	408.891	3.64744	0.00377043	0.0852916
LEUER_G0006969	LOC116978564	47.9103	-9.02731	0.00379124	0.0854147
LEUER_G0015785	qtrt1	920.475	5.32136	0.00379691	0.0854147
LEUER_G0003129	LOC116972911	52.6305	-6.30062	0.00381199	0.0855171
LEUER_G0010579	nell2	3106.65	2.62474	0.00386026	0.0863614
LEUER_G0008162	hunk	48.9197	-9.0563	0.0038736	0.0864217
LEUER_G0011873	npbwr2	49.7282	-9.07974	0.0039703	0.0883364
LEUER_G0015628	dnaaf4	119.194	-5.25556	0.00400826	0.0888586
LEUER_G0014480	LOC116989793	254.139	-4.99337	0.00401565	0.0888586
LEUER_G0011061	LOC116984368	34.4746	-8.5524	0.00403793	0.0889815
LEUER_G0001134	tfpi2	36.2221	-8.62331	0.00404312	0.0889815
LEUER_G0007031	LOC116978638	252.849	-3.94291	0.00408608	0.0896838
LEUER_G0004255	spry2	47.4624	-9.01395	0.00410162	0.0897824
LEUER_G0002589	slc39a6	712.264	3.53438	0.00415401	0.0905353
LEUER_G0010021	LOC116983569	50.0549	-9.08913	0.0041661	0.0905353
LEUER_G0010200	slc6a1	2622.71	-3.30239	0.00416946	0.0905353
LEUER_G0014674	LOC116990647	47.5143	-9.01446	0.0041836	0.0906
LEUER_G0003193	LOC116972984	54.4507	-8.24466	0.00421533	0.0910444
LEUER_G0004472	LOC116974989	46.6331	-8.98834	0.00423187	0.0911593
LEUER_G0001335	colq	1484.56	-3.43007	0.00426764	0.0916864
LEUER_G0011294	flnc	46.521	-8.98469	0.00429944	0.092126
LEUER_G0016656	nefl	32188.1	2.4126	0.00435241	0.0928811
LEUER_G0016804	mxd1	63.0227	-7.02056	0.00435756	0.0928811
LEUER_G0001347	hibadh	392.381	3.18158	0.00439083	0.0930346
LEUER_G0015134	dolk	45.972	9.17465	0.00439263	0.0930346
LEUER_G0006201	LOC116977508	206.269	6.21609	0.00439912	0.0930346
LEUER_G0001983	shc3	43.5089	6.93978	0.00445127	0.0938929
LEUER_G0005032	acss1	132.63	-6.66866	0.00448672	0.0939844
LEUER_G0004021	LOC116974216	209.441	3.75207	0.00449335	0.0939844
LEUER_G0004958	znf142	43.5163	-6.99977	0.00449878	0.0939844
LEUER_G0009469	LOC116982443	44.0688	9.11367	0.00450697	0.0939844
LEUER_G0013598	dlgap3	482.43	3.91973	0.00451556	0.0939844
LEUER_G0003042	golga4	1025.06	-2.88848	0.00453139	0.0939844
LEUER_G0011374	usp6nl	195.049	-3.78747	0.00453662	0.0939844
LEUER_G0015102	kcnt1	263.082	-5.21574	0.00460037	0.0950626
LEUER_G0014901	utp3	344.884	3.26096	0.00464802	0.0958036
LEUER_G0017266	dapk2	46.4184	-8.98128	0.0047016	0.0961916
LEUER_G0007656	gnb4	765.697	3.19776	0.00471543	0.0961916
LEUER_G0008334	ptgfrn	98.1675	-4.5158	0.00472386	0.0961916
LEUER_G0007330	utp14a	451.856	3.61395	0.00472743	0.0961916
LEUER_G0006635	usp33	520.119	4.05616	0.00472839	0.0961916
LEUER_G0006530	lrrc41	137.233	-4.78215	0.00474598	0.0961916
LEUER_G0006318	zbtb37	249.589	-3.55827	0.00474976	0.0961916
LEUER_G0016090	p4ha1	226.726	-4.04205	0.00476534	0.0962669
LEUER_G0014418	acsbg2	1311.16	2.69906	0.00487196	0.0981766
LEUER_G0006942	camk2a	71.9344	-5.50267	0.00489255	0.0983475
LEUER_G0000881	LOC116981902	45.1983	-8.94341	0.0049172	0.0985095
LEUER_G0006899	lrrtm2	406.084	4.15613	0.00492487	0.0985095
LEUER_G0012912	tmem119	120.201	-5.70739	0.00493821	0.0985337
LEUER_G0006086	dlst	424.373	-3.18102	0.00495952	0.0986889
LEUER_G0014637	bbs10	52.5032	-8.1913	0.00497029	0.0986889
LEUER_G0004872	kynu	94.8666	5.88654	0.00502134	0.0994351
LEUER_G0014818	LOC116990485	83.5296	-5.75952	0.00503236	0.0994351
LEUER_G0015570	frmd5	396.025	-3.35589	0.00510643	0.10063
LEUER_G0015137	med27	114.319	4.43216	0.00511763	0.10063
LEUER_G0003667	cmpk2	34.7456	8.77079	0.00518342	0.101446
LEUER_G0000437	col25a1	44.2821	-8.91371	0.00519583	0.101446
LEUER_G0002914	ppp4r1	679.749	2.915	0.00519661	0.101446
LEUER_G0006830	c2cd2	340.132	-3.05276	0.00525024	0.101934
LEUER_G0007977	dlg1	232.77	-3.56929	0.00525772	0.101934
LEUER_G0011004	LOC116984308	719.122	-3.64036	0.00525924	0.101934
LEUER_G0004473	LOC116974988	168.621	-4.85487	0.00528716	0.102231
LEUER_G0003559	ucn	45.8744	-8.96499	0.00530603	0.102352
LEUER_G0010549	chst11	42.7767	9.07069	0.00537022	0.103345
LEUER_G0006360	fam163a	60.0503	7.06841	0.00539978	0.103668
LEUER_G0013672	snip1	136.595	-4.33736	0.00548382	0.105033
LEUER_G0006522	nsun4	118.972	5.00094	0.00549892	0.105075
LEUER_G0008340	nhlh2	301.937	-3.79478	0.00552922	0.105399
LEUER_G0005626	LOC116976705	229.03	-4.17558	0.00554283	0.105399
LEUER_G0017204	vps33b	271.539	4.39258	0.0055548	0.105399
LEUER_G0002630	dscc1	46.8777	-8.99447	0.00566357	0.107212
LEUER_G0013654	mtf1	132.787	4.0454	0.00569103	0.107481
LEUER_G0005362	phf10	138.258	-6.26635	0.00576182	0.108405
LEUER_G0005148	prkd3	229.408	-5.9943	0.00576664	0.108405
LEUER_G0017560	tpm3	71.9285	-5.6057	0.00585448	0.109802
LEUER_G0005487	nkx2-2	118.61	-4.72451	0.00595975	0.111519
LEUER_G0017607	mecp2	43.9198	-8.90089	0.00597745	0.111593
LEUER_G0000790	grp	41.1545	9.01497	0.00601649	0.111968
LEUER_G0001970	ercc6l2	607.203	-3.36561	0.00602513	0.111968
LEUER_G0001880	reep5	604.057	2.86481	0.00612672	0.113575
LEUER_G0010722	nav2	1100.63	-2.91272	0.00613957	0.113575
LEUER_G0012357	pfdn2	189.115	-4.79145	0.00616975	0.113874
LEUER_G0007452	sh3bgrl	41.9299	-6.37708	0.00623408	0.1148
LEUER_G0009302	mpp2	65.0828	-5.61802	0.00633873	0.116463
LEUER_G0010018	LOC116983228	291.787	4.21535	0.00637399	0.116477
LEUER_G0010703	lin7c	40.7715	9.00142	0.00638391	0.116477
LEUER_G0011823	pgap6	118.539	4.79609	0.00639114	0.116477
LEUER_G0008961	LOC116981452	192.882	-4.12024	0.00641973	0.116477
LEUER_G0001769	pigm	151.229	4.53778	0.00642703	0.116477
LEUER_G0009595	LOC116982602	745.383	3.04806	0.0064494	0.116477
LEUER_G0009873	arhgef3	233.592	-4.80838	0.0064534	0.116477
LEUER_G0012125	LOC116986436	2173.99	-4.20452	0.00645419	0.116477
LEUER_G0013967	LOC116989013	1380.01	-2.50614	0.00649754	0.116999
LEUER_G0014759	angptl7	68.6093	-6.40344	0.00664471	0.119384
LEUER_G0001749	LOC116969442	43.4218	-8.88575	0.00683786	0.12235
LEUER_G0004469	carf	480.973	-3.71215	0.00683988	0.12235
LEUER_G0005563	cnrip1	438.688	-2.70123	0.00686418	0.122514
LEUER_G0008750	wbp1l	68.8961	7.15374	0.00689697	0.12283
LEUER_G0009277	dusp3	182.167	-3.92463	0.00692377	0.123037
LEUER_G0014713	rap1gap	118.8	-5.25487	0.00697604	0.123637
LEUER_G0004356	tsga10	42.8441	-8.86537	0.00698799	0.123637
LEUER_G0016096	anapc16	297.667	-3.08019	0.00709076	0.125183
LEUER_G0016657	nefm	61068.5	2.22087	0.00711867	0.125403
LEUER_G0007948	LOC116979969	138.659	-5.32105	0.00720181	0.126593
LEUER_G0005136	acat2	226.497	3.51712	0.00727751	0.127647
LEUER_G0002604	bmper	184.196	4.14193	0.00734609	0.128385
LEUER_G0016111	unc5b	66.624	-7.10298	0.00735119	0.128385
LEUER_G0004641	gorasp2	408.256	-2.95132	0.0074358	0.129361
LEUER_G0009264	rnd2	524.954	-4.40083	0.00747892	0.129361
LEUER_G0006736	LOC116978762	252.516	4.16741	0.00747978	0.129361
LEUER_G0016570	LOC116967258	1372.79	-4.49823	0.00748214	0.129361
LEUER_G0005561	pno1	81.4621	4.48547	0.0074867	0.129361
LEUER_G0006045	psmc1	496.537	-3.22998	0.0075106	0.129498
LEUER_G0006602	LOC116978012	193.305	5.85883	0.00759116	0.13061
LEUER_G0009867	cacna2d3	146.135	-5.26132	0.00764096	0.131189
LEUER_G0011550	kdelr2	963.121	3.14103	0.00769096	0.131652
LEUER_G0004545	gulp1	40.3395	-8.77874	0.00771407	0.131652
LEUER_G0005231	syt14	465.989	-3.06849	0.0077166	0.131652
LEUER_G0012985	cdk2ap1	83.3184	-5.51561	0.00773614	0.131709
LEUER_G0016279	bms1	1568.53	-2.88493	0.00778229	0.132218
LEUER_G0003934	trpc4	40.8879	-8.79898	0.00783273	0.132797
LEUER_G0017561	LOC116968894	1181.21	-3.82447	0.00786181	0.133012
LEUER_G0005454	stxbp5	571.282	-3.09176	0.00789542	0.133303
LEUER_G0007370	gdpd2	71.7322	-5.20181	0.00792291	0.13349
LEUER_G0017371	LOC116968652	184.611	-4.46553	0.00796468	0.133915
LEUER_G0015854	pin1	278.701	3.43571	0.00802598	0.134545
LEUER_G0000776	galt	60.9681	6.14464	0.00803528	0.134545
LEUER_G0002665	LOC116972014	69.3577	6.91153	0.00811173	0.135546
LEUER_G0010850	tmem41b	60.8506	5.95611	0.00818852	0.136548
LEUER_G0006288	LOC116977631	29.9473	7.62804	0.00826554	0.13755
LEUER_G0016044	lrrc18	102.069	-6.30155	0.00832459	0.13825
LEUER_G0015787	slc44a2	305.418	2.99901	0.00841366	0.139443
LEUER_G0001337	fkbp14	41.0454	-8.80278	0.00854718	0.141368
LEUER_G0011200	lamb1	167.419	-5.19067	0.00859216	0.141718
LEUER_G0005375	LOC116976253	534.989	2.71613	0.00860324	0.141718
LEUER_G0003369	LOC116973178	126.695	-4.67276	0.00863861	0.142012
LEUER_G0000546	atp10d	1375.74	2.97087	0.00868434	0.142476
LEUER_G0008131	dscam	598.911	-3.57783	0.00870608	0.142544
LEUER_G0002867	sox17	38.5199	-8.71261	0.00878401	0.143428
LEUER_G0012184	eif6	146.242	5.36673	0.00879535	0.143428
LEUER_G0004198	LOC116974418	263.398	-3.72044	0.00882554	0.143632
LEUER_G0002487	LOC116971798	467.907	-3.74633	0.00884891	0.143724
LEUER_G0008881	atad1	55.9678	5.80585	0.00890758	0.144388
LEUER_G0002737	LOC116972101	104.684	4.65521	0.00896645	0.14472
LEUER_G0015726	efl1	111.662	4.30916	0.0089723	0.14472
LEUER_G0005767	rab15	107.973	4.56752	0.00898151	0.14472
LEUER_G0012522	bysl	53.1157	5.70543	0.00904096	0.145389
LEUER_G0001422	LOC116990886	245.005	4.15056	0.00913413	0.14653
LEUER_G0011634	elfn1	537.225	-3.58046	0.00915761	0.14653
LEUER_G0000098	hhip	142.549	-5.95886	0.009166	0.14653
LEUER_G0014929	wnt4	352.201	-3.82431	0.0093171	0.148653
LEUER_G0006366	sgip1	1207.77	2.7039	0.0093848	0.149439
LEUER_G0002924	lama1	614.959	-3.1985	0.00945437	0.150153
LEUER_G0005810	prkd1	38.8434	-8.7242	0.00946662	0.150153
LEUER_G0016129	ccser2	1103.92	2.50093	0.00949717	0.150344
LEUER_G0002160	LOC116971566	38.1764	-8.69998	0.00972355	0.153628
LEUER_G0011277	reln	1402.2	-2.33526	0.00983582	0.1551
LEUER_G0012983	kmt5a	154.967	5.07995	0.00991133	0.155988
LEUER_G0011665	cog7	44.8819	-7.10808	0.00999241	0.156676
LEUER_G0011362	exoc4	789.016	2.75292	0.0099936	0.156676
LEUER_G0005853	baz1a	654.023	-3.2497	0.0100958	0.157973
LEUER_G0011834	tmc7	165.549	4.75198	0.010149	0.158499
LEUER_G0009534	cdh13	409.335	-3.26448	0.0101693	0.158512
LEUER_G0000591	paics	343.439	-2.96624	0.0102715	0.159799
LEUER_G0016682	LOC116967413	893.523	-2.69188	0.010337	0.160395
LEUER_G0015199	rabgap1	1299.76	-2.70781	0.0103493	0.160395
LEUER_G0012013	LOC116986290	48.8913	-6.15655	0.0104064	0.16075
LEUER_G0011393	sephs1	527.716	-3.78628	0.0104118	0.16075
LEUER_G0011251	cacna2d1	1254.66	-2.69396	0.0105455	0.162505
LEUER_G0002425	fam151b	131.677	-4.8236	0.0106449	0.163726
LEUER_G0003707	extl3	405.738	-2.85693	0.0107178	0.164412
LEUER_G0001708	pip4k2a	66.2225	-5.84909	0.01073	0.164412
LEUER_G0008699	hspa12a	1939.12	2.53571	0.0107584	0.164536
LEUER_G0012123	pcif1	538.962	-2.83299	0.0108235	0.165221
LEUER_G0001816	LOC116970737	572.891	-2.75004	0.0108845	0.165841
LEUER_G0003738	spast	144.93	-4.10776	0.0109453	0.166129
LEUER_G0000983	nop56	132.565	-3.79865	0.0109482	0.166129
LEUER_G0006735	rapgef6	522.87	2.63388	0.0109763	0.166129
LEUER_G0011961	tshz2	2460.13	-2.35768	0.0109853	0.166129
LEUER_G0003983	LOC116974165	230.074	-3.23508	0.0110292	0.166484
LEUER_G0001513	kat2b	148.806	-4.58419	0.0110982	0.166964
LEUER_G0002086	leprotl1	41.4919	-7.85205	0.0111128	0.166964
LEUER_G0008823	cfap43	131.31	-4.94433	0.0111227	0.166964
LEUER_G0002272	LOC116971342	38.551	-8.71227	0.0112035	0.167536
LEUER_G0010096	LOC116983323	36.8395	-8.6478	0.011211	0.167536
LEUER_G0014663	LOC116990665	645.993	-3.52597	0.0112227	0.167536
LEUER_G0010146	plxnb1	560.146	-2.61747	0.0113119	0.168527
LEUER_G0017241	pclaf	62.4335	-6.99612	0.0113306	0.168527
LEUER_G0005924	bmp4	37.331	-8.66665	0.0114006	0.169258
LEUER_G0016101	tysnd1	35.3458	8.79544	0.0114225	0.169274
LEUER_G0009225	myl4	369.642	3.71468	0.0114708	0.169679
LEUER_G0012047	LOC116986330	1355.33	2.72845	0.011557	0.170371
LEUER_G0008374	tspan7	514.805	2.99997	0.0115614	0.170371
LEUER_G0011506	slc5a10	35.8752	-8.60969	0.0115805	0.170371
LEUER_G0002821	colec12	36.3676	-8.62922	0.0116094	0.170488
LEUER_G0009955	edem1	1223.3	-3.67637	0.0116309	0.170496
LEUER_G0005859	LOC116976616	110.415	5.20103	0.0116973	0.170927
LEUER_G0015663	LOC116991764	35.5727	-8.59757	0.0117316	0.170927
LEUER_G0003768	rab23	258.384	-4.59741	0.0117418	0.170927
LEUER_G0011431	ercc4	296.762	4.28769	0.0117445	0.170927
LEUER_G0015611	fsd2	36.0747	-8.61757	0.0118113	0.171591
LEUER_G0006823	dnajc18	51.0044	6.63125	0.011847	0.171722
LEUER_G0003384	tstd3	31.9404	7.60828	0.0118626	0.171722
LEUER_G0002727	ldlrad4	231.316	3.89033	0.0119173	0.172207
LEUER_G0013780	dhx40	35.4806	-8.59376	0.0119505	0.172381
LEUER_G0001706	LOC116985375	125.102	3.77742	0.0120344	0.173282
LEUER_G0006541	elovl1	138.644	4.65683	0.0120667	0.17344
LEUER_G0001261	vwde	120.424	4.6183	0.0121092	0.173743
LEUER_G0009848	uri1	318.779	-3.32566	0.0122309	0.174999
LEUER_G0005978	syt16	138.405	4.6436	0.0122747	0.174999
LEUER_G0007263	drp2	39.7292	-7.79009	0.0123081	0.174999
LEUER_G0003704	pnoc	44.2435	-6.953	0.0123139	0.174999
LEUER_G0016084	csgalnact2	187.029	-3.88939	0.012318	0.174999
LEUER_G0000030	ankrd50	1063.32	-2.77138	0.012326	0.174999
LEUER_G0015468	kirrel3	36.8331	-8.6465	0.0126304	0.179008
LEUER_G0004105	LOC116974317	410.453	-2.95171	0.0127196	0.179958
LEUER_G0015450	stt3a	653.491	2.8137	0.012744	0.17999
LEUER_G0012378	LOC116986583	1009.49	-4.08618	0.0128168	0.180462
LEUER_G0011866	xkr7	444.708	4.21689	0.0128219	0.180462
LEUER_G0000577	pdgfra	35.1175	-8.57878	0.0128602	0.180688
LEUER_G0009871	ccdc66	634.076	-2.87612	0.0129114	0.181094
LEUER_G0011554	LOC116985698	110.185	4.40653	0.0129943	0.181708
LEUER_G0014282	LOC116989470	351.96	3.64852	0.0129999	0.181708
LEUER_G0008057	hsf2bp	97.6831	5.50137	0.0130835	0.182563
LEUER_G0002624	LOC116971961	34.4339	-8.55058	0.013196	0.183816
LEUER_G0008968	LOC116981545	39.2317	-5.908	0.0132547	0.184211
LEUER_G0017868	LOC116970266	114.169	5.27814	0.0132697	0.184211
LEUER_G0016588	snrnp200	1229.99	-2.6353	0.0132951	0.184248
LEUER_G0009957	bhlhe40	188.522	-4.48719	0.0134839	0.186546
LEUER_G0009222	LOC116981947	34.4008	-8.54863	0.013513	0.186631
LEUER_G0013633	col9a2	35.2668	-8.5848	0.0135425	0.186721
LEUER_G0016675	slc23a2	358.345	-3.69983	0.0138289	0.190257
LEUER_G0006311	cop1	470.041	-3.48544	0.0138458	0.190257
LEUER_G0012716	nefh	569.758	3.56207	0.0139484	0.19133
LEUER_G0000799	onecut2	811.495	2.62752	0.013971	0.19133
LEUER_G0008349	dcaf6	858.124	2.44525	0.014004	0.191458
LEUER_G0007037	LOC116978643	3741.45	2.5733	0.0141287	0.19284
LEUER_G0016506	myh9	1144.27	-2.25298	0.0142127	0.193562
LEUER_G0007151	LOC116978890	178.933	-3.5008	0.0142293	0.193562
LEUER_G0003486	rnf146	86.1286	5.29129	0.0142976	0.194165
LEUER_G0003827	mettl24	32.0461	8.65387	0.0144088	0.195049
LEUER_G0012875	coq5	58.7706	6.0589	0.0144235	0.195049
LEUER_G0006313	kiaa0040	33.9328	-8.52999	0.0144347	0.195049
LEUER_G0017282	tpm1	185.735	3.63167	0.0144857	0.195412
LEUER_G0015576	snapc5	59.6025	6.03849	0.0145921	0.196315
LEUER_G0004384	slc9a7	384.268	3.4593	0.014601	0.196315
LEUER_G0002273	LOC116971343	152.604	-4.17427	0.0147223	0.197422
LEUER_G0006777	trpc7	86.7995	-6.05102	0.0147319	0.197422
LEUER_G0007408	gab3	33.2361	-8.49991	0.0148167	0.198231
LEUER_G0006328	LOC116978116	32.9893	8.6959	0.0148516	0.198371
LEUER_G0008122	erg	151.988	-4.75815	0.0148791	0.198413
LEUER_G0008047	mynn	33.0401	6.76289	0.0149153	0.198569
LEUER_G0000900	rnf24	500.095	2.72443	0.0149656	0.198913
LEUER_G0002606	nt5c3a	113.23	4.42387	0.015138	0.200876
LEUER_G0009696	rfwd3	148.913	-3.45275	0.0151752	0.20104
LEUER_G0009796	tox3	634.525	-2.47187	0.0152155	0.201148
LEUER_G0007384	LOC116979152	470.426	2.84853	0.0152328	0.201148
LEUER_G0005665	pigh	185.123	3.9023	0.0152891	0.201563
LEUER_G0006844	simc1	683.84	-2.96067	0.0153358	0.201851
LEUER_G0003556	cad	579.77	2.58305	0.015419	0.20257
LEUER_G0007999	LOC116980018	256.033	-3.23366	0.0154403	0.20257
LEUER_G0015163	tnc	328.464	-3.19235	0.0154886	0.202876
LEUER_G0013290	mxra7	1078.46	2.4855	0.01553	0.202882
LEUER_G0003021	LOC116972458	392.88	3.49202	0.0155391	0.202882
LEUER_G0012095	dhx35	34.3522	-6.72402	0.0156307	0.203751
LEUER_G0000777	cntfr	1346.95	2.34362	0.0156569	0.203766
LEUER_G0009095	psmb3	360.758	-2.6832	0.015865	0.205967
LEUER_G0006040	rps6ka5	131.665	-4.13992	0.0158768	0.205967
LEUER_G0015075	fam78a	111.626	4.81829	0.0159306	0.206335
LEUER_G0011002	pacsin3	108.482	-5.89408	0.0159972	0.206655
LEUER_G0005878	trappc6b	1354.66	2.23598	0.0160061	0.206655
LEUER_G0014794	dnajc11	148.064	3.97328	0.0161633	0.208353
LEUER_G0000323	grid2	1639.78	-2.45881	0.0162489	0.209123
LEUER_G0003929	dnajc3	438.302	-2.85937	0.0162951	0.209387
LEUER_G0005834	xrcc3	102.21	5.00224	0.0163919	0.210299
LEUER_G0001266	ica1	45.6371	-7.13979	0.0164196	0.210321
LEUER_G0003749	galnt2	317.597	2.98491	0.0165213	0.211238
LEUER_G0010351	ppara	29.2004	-7.34134	0.016544	0.211238
LEUER_G0004380	nipa2	128.595	4.27067	0.0165692	0.211238
LEUER_G0001515	ctnnal1	73.3695	-5.8029	0.0165972	0.211263
LEUER_G0009089	lasp1	125.687	-4.01471	0.0166393	0.211324
LEUER_G0004554	znf804a	951.589	3.45207	0.0166765	0.211324
LEUER_G0006695	hmgxb3	309.168	3.08133	0.0166801	0.211324
LEUER_G0013417	znf593	658.378	2.46439	0.0167514	0.21181
LEUER_G0011911	prex1	93.8521	-5.85342	0.0167752	0.21181
LEUER_G0010802	rnf141	55.4636	-4.55668	0.0167967	0.21181
LEUER_G0014672	pex14	238.764	3.8591	0.0168811	0.212545
LEUER_G0000075	lrba	401.249	-2.64751	0.0169256	0.212775
LEUER_G0011249	mapk12	90.0225	-3.78576	0.0170056	0.213234
LEUER_G0013384	cd164l2	31.8167	-8.43692	0.0170146	0.213234
LEUER_G0012783	LOC116987445	30.4651	8.58106	0.0171393	0.213551
LEUER_G0006667	ddah1	1138.64	2.44814	0.0171421	0.213551
LEUER_G0013783	vmp1	796.697	-3.09028	0.0171493	0.213551
LEUER_G0002505	rnf19a	439.316	3.54723	0.0171677	0.213551
LEUER_G0004911	LOC116975561	359.837	-3.35443	0.0171714	0.213551
LEUER_G0008418	LOC116980723	41.9659	-5.30536	0.0172527	0.214234
LEUER_G0007574	pax3	214.836	-4.19318	0.0175283	0.217325
LEUER_G0001836	nr2f1	3901.56	2.10944	0.0175984	0.217861
LEUER_G0006130	LOC116977432	32.0856	6.72405	0.0179381	0.221728
LEUER_G0012338	LOC116986834	32.1593	-8.45262	0.0179798	0.221906
LEUER_G0013706	LOC116988735	71.3397	-4.16675	0.0181252	0.223361
LEUER_G0017455	arf3	459.635	3.11397	0.0181874	0.223655
LEUER_G0012679	LOC116987330	214.071	3.56677	0.0182041	0.223655
LEUER_G0015565	spg11	437.364	-2.75733	0.0182367	0.223716
LEUER_G0016372	LOC116967092	275.402	-4.40444	0.0185216	0.226869
LEUER_G0012179	tubd1	92.9774	4.38661	0.0187166	0.228911
LEUER_G0001765	nkd2	258.809	-2.96297	0.0188586	0.230301
LEUER_G0012757	ggt5	31.8149	-8.4371	0.0189437	0.230994
LEUER_G0017462	erbb3	87.6926	-4.9557	0.019092	0.232017
LEUER_G0002983	plekhf2	124.039	-4.31666	0.0191133	0.232017
LEUER_G0004024	grm5	266.07	-3.25888	0.0191134	0.232017
LEUER_G0011557	eef2k	212.01	-3.12925	0.0192478	0.2333
LEUER_G0006907	LOC116978386	1137.48	-2.61151	0.0194243	0.235089
LEUER_G0015594	mtfmt	33.301	7.66473	0.0194691	0.235281
LEUER_G0006986	LOC116978585	134.6	-4.65092	0.0195503	0.235578
LEUER_G0001531	krit1	108.667	3.84004	0.0195517	0.235578
LEUER_G0012224	srgap2	1382.57	-2.39851	0.0196716	0.236466
LEUER_G0002803	snx16	30.6857	-8.38488	0.0197192	0.236466
LEUER_G0010949	pnpla2	59.251	6.28718	0.0197396	0.236466
LEUER_G0007556	itm2c	286.525	-3.53791	0.0197419	0.236466
LEUER_G0004548	calcrl	30.2374	-8.36325	0.0198428	0.237325
LEUER_G0014194	LOC116989360	60.7859	5.41993	0.0199871	0.238222
LEUER_G0006730	LOC116978253	30.1641	-8.35985	0.0199904	0.238222
LEUER_G0014820	nol9	374.667	3.35702	0.0200094	0.238222
LEUER_G0015728	tmc3	231.379	-4.24071	0.0200684	0.238222
LEUER_G0010831	mob2	30.3779	-8.36929	0.020087	0.238222
LEUER_G0012149	rab22a	330.816	3.26535	0.0200945	0.238222
LEUER_G0006231	LOC116977552	116.853	4.39195	0.0201419	0.238222
LEUER_G0005616	nin	332.964	-3.29113	0.0201525	0.238222
LEUER_G0010529	LOC116984001	30.2676	-8.36444	0.0202693	0.238916
LEUER_G0006221	uck2	396.92	2.43449	0.0202701	0.238916
LEUER_G0010857	dennd2b	56.1395	-6.07996	0.020342	0.239093
LEUER_G0014745	hspg2	940.647	-2.96798	0.020393	0.239093
LEUER_G0002250	haus3	199.652	-4.0301	0.0204023	0.239093
LEUER_G0008524	LOC116980832	106.843	5.02711	0.0204028	0.239093
LEUER_G0017448	LOC116968859	2528.01	1.9627	0.0205322	0.240262
LEUER_G0009926	arl6ip5	83.798	4.4066	0.0205879	0.240328
LEUER_G0002401	enc1	2309.24	-2.41194	0.020597	0.240328
LEUER_G0007983	senp5	584.942	-2.51152	0.0208481	0.242601
LEUER_G0004713	mcm3ap	681.838	-2.28202	0.0208516	0.242601
LEUER_G0008809	lbx1	31.893	-5.96909	0.0209134	0.242737
LEUER_G0002324	stox2	286.312	-3.13731	0.020923	0.242737
LEUER_G0017547	tdrkh	553.505	-2.43522	0.0210497	0.243859
LEUER_G0001396	LOC116990551	385.245	2.55824	0.0212498	0.245302
LEUER_G0009893	acox2	146.883	-4.40724	0.0212691	0.245302
LEUER_G0008299	ap1s2	398.631	-2.9773	0.021293	0.245302
LEUER_G0010299	rtcb	177.459	3.56272	0.0212952	0.245302
LEUER_G0004827	vps8	161.705	-3.21744	0.0213435	0.245364
LEUER_G0007304	LOC116979064	74.208	4.30864	0.0213609	0.245364
LEUER_G0017099	LOC116968169	88.1306	-4.66143	0.0217318	0.249271
LEUER_G0007376	LOC116979142	95.9487	-5.1019	0.0217906	0.249593
LEUER_G0009105	mrpl45	64.0496	4.91691	0.0219222	0.250397
LEUER_G0001738	LOC116969262	400.872	2.95863	0.0219333	0.250397
LEUER_G0015923	atp13a1	186.639	3.576	0.0219533	0.250397
LEUER_G0005482	ralgapa2	839.141	-2.62642	0.0220645	0.251313
LEUER_G0013188	bahcc1	1684.77	-2.40482	0.022123	0.251522
LEUER_G0002525	sqle	968.917	2.62399	0.0221449	0.251522
LEUER_G0010496	mybpc1	29.885	-8.34502	0.0222911	0.252668
LEUER_G0008741	slf2	244.21	-3.04463	0.0223079	0.252668
LEUER_G0003020	cpne3	168.864	3.56102	0.0225868	0.25547
LEUER_G0015201	strbp	537.574	-2.33563	0.0226709	0.256064
LEUER_G0017147	arid3b	342.082	-3.70021	0.0228958	0.258054
LEUER_G0006468	nasp	229.057	-3.12195	0.0229106	0.258054
LEUER_G0007458	hdx	228.648	-3.11193	0.0229665	0.258325
LEUER_G0010566	slc16a7	564.143	3.63334	0.0230525	0.258934
LEUER_G0009847	znf536	728.764	-2.38306	0.0231011	0.259122
LEUER_G0015346	LOC116991342	377.414	-3.35065	0.0236865	0.265322
LEUER_G0008480	LOC116980249	56.3815	-5.6213	0.0238519	0.266725
LEUER_G0017175	tmem266	488.514	3.9495	0.0238775	0.266725
LEUER_G0003997	fam76b	959.085	-2.70504	0.0239278	0.266772
LEUER_G0008049	masp1	168.734	-4.66601	0.0239474	0.266772
LEUER_G0015511	polg	114.121	-3.99829	0.0240558	0.267612
LEUER_G0009950	bsn	2065.08	-2.14866	0.0241407	0.26819
LEUER_G0001957	golm1	101.258	-4.4064	0.0242496	0.269031
LEUER_G0013882	LOC116988914	45.8034	-6.54633	0.0243602	0.269889
LEUER_G0007787	myo7b	52.771	-6.33436	0.0244042	0.270009
LEUER_G0004243	gpc6	204.606	-3.75966	0.024438	0.270015
LEUER_G0010455	kdm5a	687.539	-2.51538	0.0245498	0.270882
LEUER_G0002249	LOC116971310	370.574	2.49714	0.0246953	0.272118
LEUER_G0007655	mfn1	373.542	2.95336	0.0247659	0.272525
LEUER_G0012401	mybph	67.353	-5.88896	0.0248788	0.272907
LEUER_G0009484	gas8	145.971	4.19843	0.0249002	0.272907
LEUER_G0002626	LOC116971962	486.076	2.28353	0.0249014	0.272907
LEUER_G0012669	morn3	57.4594	-5.63959	0.025287	0.276587
LEUER_G0006181	slc35a3	193.246	2.82562	0.0253362	0.276587
LEUER_G0010410	caprin2	358.576	-2.7992	0.0253393	0.276587
LEUER_G0012684	rad9b	30.7788	-7.41998	0.0256027	0.279087
LEUER_G0009335	LOC116982065	903.419	-2.7279	0.0257962	0.280819
LEUER_G0008011	rpl35a	650.451	-2.66829	0.0260714	0.283435
LEUER_G0010412	dennd5b	2236.69	-2.82891	0.0261252	0.28364
LEUER_G0004826	nme9	349.82	-3.93147	0.0262267	0.284362
LEUER_G0009566	mplkip	568.612	-3.64355	0.0263634	0.285452
LEUER_G0011711	foxj1	108.182	-5.04128	0.0264315	0.285452
LEUER_G0015198	rc3h2	508.37	-2.34651	0.0264327	0.285452
LEUER_G0004127	LOC116974343	290.256	-2.95338	0.0265533	0.286373
LEUER_G0011684	c22h16orf91	38.2032	6.93598	0.0268268	0.28894
LEUER_G0012177	ahcy	871.168	-2.58538	0.0269686	0.289375
LEUER_G0002121	fktn	356.945	-3.01454	0.026984	0.289375
LEUER_G0016941	axl	72.3216	-5.79763	0.0269867	0.289375
LEUER_G0004102	sh3rf3	773.22	-2.78871	0.0270098	0.289375
LEUER_G0008130	pcp4	4567.23	-2.57686	0.027052	0.289446
LEUER_G0009964	tusc2	171.911	3.15036	0.0271937	0.290309
LEUER_G0016508	foxred2	180.964	3.81303	0.0272371	0.290309
LEUER_G0008907	slc25a16	88.1261	4.02631	0.02724	0.290309
LEUER_G0005744	map3k9	225.006	-3.31548	0.0274793	0.292477
LEUER_G0000588	cracd	222.204	-4.30468	0.0275758	0.293119
LEUER_G0007276	sytl4	43.8266	-5.04417	0.0277234	0.294303
LEUER_G0009324	itga3	843.263	2.0746	0.0278741	0.295398
LEUER_G0003722	tbce	160.796	2.81769	0.0279141	0.295398
LEUER_G0002261	epha5	170.222	-3.23254	0.0279357	0.295398
LEUER_G0010591	cnot2	549.254	2.29561	0.0280113	0.295812
LEUER_G0011721	LOC116985899	430.512	2.39684	0.0281095	0.296464
LEUER_G0001599	kif13a	401.749	-2.51675	0.0284567	0.299736
LEUER_G0004612	sp9	76.1671	-5.0433	0.0287446	0.302229
LEUER_G0016364	rps19bp1	96.1166	-4.04635	0.0287678	0.302229
LEUER_G0015843	LOC116966111	938.006	2.63251	0.0289231	0.303193
LEUER_G0000442	hs3st1	345.746	-2.53344	0.0289342	0.303193
LEUER_G0010997	tspan4	254.206	4.39055	0.0290839	0.30437
LEUER_G0005416	LOC116976301	550.092	-3.17849	0.0292686	0.305322
LEUER_G0012077	phf20	723.276	-2.82926	0.0292832	0.305322
LEUER_G0001358.2	hoxa2	181.514	3.56641	0.0292878	0.305322
LEUER_G0007143	zdhhc15	133.87	-3.09128	0.0294011	0.306111
LEUER_G0007580	scg2	759.168	2.1011	0.0295512	0.307279
LEUER_G0012493	LOC116987011	57.4462	6.07323	0.0296159	0.307558
LEUER_G0010889	fads1	777.369	3.21525	0.0297207	0.307907
LEUER_G0002117	klf4	422.987	-2.75799	0.0297253	0.307907
LEUER_G0008308	LOC116980579	123.626	-4.65828	0.0298174	0.308468
LEUER_G0015705	mef2a	306.771	-2.60664	0.0298634	0.30855
LEUER_G0016975	LOC116967902	83.9877	-4.81866	0.0302049	0.311682
LEUER_G0003066	ccdc12	464.913	-3.7788	0.0303883	0.312899
LEUER_G0005442	stmn4	3130.65	2.18001	0.0303999	0.312899
LEUER_G0009861	dcp1a	238.794	3.68846	0.0305445	0.31399
LEUER_G0016170	timm23	307.869	2.90061	0.0306758	0.314914
LEUER_G0012867	msi1	445.8	-2.79067	0.030712	0.314914
LEUER_G0008232	mid1	400.959	-3.58251	0.0307946	0.315363
LEUER_G0013898	rasl10b	109.646	4.4486	0.0308608	0.315643
LEUER_G0016427	phf5a	71.3985	4.44611	0.0309459	0.316116
LEUER_G0016067	rgr	71.6612	-5.78354	0.0312746	0.318837
LEUER_G0011495	eri2	294.554	4.15035	0.0312909	0.318837
LEUER_G0016986	c41h19orf47	207.395	3.38874	0.0313605	0.319146
LEUER_G0000829	ctif	252.078	3.00573	0.0314075	0.319225
LEUER_G0009218	LOC116981943	5074.99	-2.03616	0.0315174	0.319941
LEUER_G0001994	ror2	270.467	3.9684	0.0316326	0.320593
LEUER_G0012469	cntn2	478.005	-2.69262	0.0316658	0.320593
LEUER_G0012925	fam222a	443.988	-2.7342	0.0317006	0.320593
LEUER_G0014396	LOC116989596	43.6043	-5.94415	0.0317396	0.320593
LEUER_G0004928	ttll4	115.98	-4.27752	0.0318617	0.321313
LEUER_G0006780	LOC116978312	286.405	2.8658	0.031914	0.321313
LEUER_G0002815	emilin2	268.552	-4.15503	0.0319295	0.321313
LEUER_G0009232	LOC116981959	47.5149	-6.18141	0.0323437	0.325078
LEUER_G0011372	asb13	34.3673	6.27224	0.0324328	0.325571
LEUER_G0005555	LOC116976540	72.8143	4.07282	0.032594	0.326785
LEUER_G0013165	LOC116987968	180.535	3.65413	0.0328895	0.329341
LEUER_G0017123	senp8	75.4213	-5.67164	0.0329833	0.329873
LEUER_G0006369	mier1	76.745	-3.50638	0.0331097	0.330173
LEUER_G0009854	wnk2	874.315	2.26496	0.0331285	0.330173
LEUER_G0000245	tbc1d14	180.136	-2.9227	0.0331352	0.330173
LEUER_G0000889	lzts3	568.356	-2.90551	0.0332018	0.330431
LEUER_G0012288	LOC116986775	78.6928	-3.5687	0.0333089	0.331092
LEUER_G0011851	slc32a1	550.219	-3.10728	0.0335021	0.332269
LEUER_G0014974	fkbp15	253.524	3.07881	0.0335093	0.332269
LEUER_G0009284	LOC116982016	96.528	-4.19827	0.0337366	0.333952
LEUER_G0016022	LOC116966495	591.747	3.01444	0.0337612	0.333952
LEUER_G0010424	LOC116983863	318.938	3.28289	0.0338686	0.334607
LEUER_G0014559	LOC116990192	30.6404	-6.41352	0.0340169	0.33525
LEUER_G0010363	LOC116983777	111.931	-3.62877	0.0340339	0.33525
LEUER_G0002811	tgif1	483.01	-2.87153	0.0340744	0.33525
LEUER_G0016477	cacng2	601.014	2.28571	0.0341911	0.33525
LEUER_G0007192	pgrmc1	196.333	-2.99356	0.0342116	0.33525
LEUER_G0004621	dlx1	84.3357	5.00289	0.0342544	0.33525
LEUER_G0010385	tmem229a	218.746	-4.34277	0.0342786	0.33525
LEUER_G0006424	spata6	242.102	-2.85645	0.0343268	0.33525
LEUER_G0001093	cyhr1	933.997	-2.59687	0.0343284	0.33525
LEUER_G0006819	LOC116978352	213.795	2.43607	0.0343887	0.33525
LEUER_G0000293	fut10	138.327	-3.71442	0.0344207	0.33525
LEUER_G0009529	cmip	756.738	2.46619	0.0344291	0.33525
LEUER_G0005618	atl1	164.238	3.15931	0.0345118	0.335559
LEUER_G0001974	cdc14b	87.2252	-4.07398	0.0345434	0.335559
LEUER_G0016691	LOC116967354	312.29	-2.65154	0.034634	0.336036
LEUER_G0005294	map4k3	305.962	-3.27789	0.0347505	0.336765
LEUER_G0014911	prdm2	806.251	-2.20681	0.035021	0.338981
LEUER_G0008459	gpm6b	1626.44	1.80188	0.0351994	0.339848
LEUER_G0011912	sulf2	1277.06	-2.23086	0.0352216	0.339848
LEUER_G0005855	sec23a	593.271	2.83505	0.0352706	0.339848
LEUER_G0014400	timm13	127.42	3.74012	0.0352779	0.339848
LEUER_G0011654	tnrc6a	900.197	-1.96119	0.0353546	0.339953
LEUER_G0009429	cbfa2t3	652.689	-2.6531	0.0353725	0.339953
LEUER_G0009999	parp3	98.094	-3.84932	0.0354647	0.340436
LEUER_G0004158	zdhhc20	138.156	-3.82513	0.0355705	0.341049
LEUER_G0003450	nus1	70.1608	4.29037	0.0356456	0.341366
LEUER_G0005550	spred2	55.1972	4.56989	0.0358948	0.343347
LEUER_G0006801	cnot6	262.11	-2.79289	0.0359529	0.343498
LEUER_G0003911	efnb2	310.396	-3.50297	0.0360079	0.343619
LEUER_G0014772	kif17	117.672	-4.45822	0.0362367	0.345397
LEUER_G0015230	ralgps1	339.805	-2.45549	0.0364476	0.347
LEUER_G0005776	LOC116976881	60.3756	-5.20185	0.0365926	0.347973
LEUER_G0017419	dazap2	117.477	3.61569	0.036806	0.349593
LEUER_G0006358	LOC116977713	128.173	-3.98496	0.0369764	0.350422
LEUER_G0004636	ubr3	781.95	2.14539	0.0369797	0.350422
LEUER_G0001779	LOC116970062	36.4873	-5.80794	0.0370836	0.350932
LEUER_G0014479	LOC116989788	48.3716	5.99783	0.0371493	0.350932
LEUER_G0005259	cep43	699.282	-2.33949	0.0371631	0.350932
LEUER_G0015090	c32h9orf78	441.836	-2.23306	0.0373231	0.352034
LEUER_G0005919	samd4a	702.839	2.94805	0.0374291	0.352624
LEUER_G0011940	b4galt5	379.567	2.8356	0.0375953	0.35378
LEUER_G0015343	LOC116991229	163.303	4.24446	0.0381183	0.358285
LEUER_G0009194	itgb3	45.9427	-6.13316	0.0381899	0.358362
LEUER_G0008343	ccdc181	762.624	-2.48628	0.0382147	0.358362
LEUER_G0005227	ubr2	634.792	-2.25744	0.0384286	0.359952
LEUER_G0007297	LOC116979057	95.9068	-5.08925	0.0384846	0.360062
LEUER_G0000798	fech	41.1821	-4.96232	0.0386706	0.360818
LEUER_G0008279	lacc1	125.118	-4.60458	0.0386987	0.360818
LEUER_G0005275	pacrg	131.283	3.32651	0.0387225	0.360818
LEUER_G0009859	bicd2	1158.33	-1.90572	0.0387472	0.360818
LEUER_G0009648	cnot1	1828.52	-1.74456	0.0387876	0.360818
LEUER_G0012140	ctsa	216.963	3.60076	0.0389162	0.361408
LEUER_G0002389	cert1	409.514	2.68224	0.03894	0.361408
LEUER_G0003493	lama2	85.8151	-4.4066	0.0390584	0.361899
LEUER_G0015905	ldlr	609.53	2.37093	0.0391045	0.361899
LEUER_G0003944	mrps31	43.5384	-6.06762	0.0391269	0.361899
LEUER_G0007077	tlx3	285.509	-3.3964	0.0391712	0.361899
LEUER_G0011618	LOC116970104	232.879	-3.42884	0.0394652	0.364201
LEUER_G0013111	pcyt2	278.501	2.79496	0.0396279	0.365075
LEUER_G0009984	dag1	973.8	2.0993	0.0397425	0.365075
LEUER_G0007365	rab41	1008.64	1.87719	0.0397762	0.365075
LEUER_G0002552	sall3	1200.8	-2.08664	0.0397926	0.365075
LEUER_G0013330	luc7l3	785.642	2.24761	0.0398195	0.365075
LEUER_G0008268	zc3h13	5002.9	-1.97611	0.0398534	0.365075
LEUER_G0010917	hps5	294.19	-2.70814	0.0398746	0.365075
LEUER_G0012597	pebp1	143.846	3.37076	0.0399951	0.365432
LEUER_G0006826	LOC116978788	122.737	4.24989	0.0400323	0.365432
LEUER_G0014894	szrd1	156.654	-3.45549	0.0400486	0.365432
LEUER_G0013208	kctd2	603.62	2.43218	0.0401881	0.366274
LEUER_G0017216	LOC116968363	607.844	-2.28076	0.0402729	0.366274
LEUER_G0007996	camk2n2	473.346	2.58116	0.040327	0.366274
LEUER_G0001155	LOC116987146	473.581	2.05026	0.0403775	0.366274
LEUER_G0008771	cutc	34.8513	-6.73615	0.0403817	0.366274
LEUER_G0004434	LOC116975666	94.121	4.11142	0.0404115	0.366274
LEUER_G0013224	mycbpap	121.729	-4.00846	0.0407725	0.368816
LEUER_G0011452	fbxl16	1147.62	1.95641	0.0407855	0.368816
LEUER_G0011619	pgp	110.221	3.68013	0.0408282	0.368816
LEUER_G0007739	klhl24	471.644	2.89115	0.0410323	0.370249
LEUER_G0013803	emc6	707.593	-2.36739	0.0415784	0.374117
LEUER_G0000359	mettl14	98.2124	-3.09976	0.0415884	0.374117
LEUER_G0007391	lamp2	272.218	-2.29393	0.0415993	0.374117
LEUER_G0001326	ngly1	182.083	-3.61993	0.0417641	0.375184
LEUER_G0015681	ap4e1	56.6188	4.89718	0.0418475	0.375517
LEUER_G0003685	acp1	60.0479	4.20813	0.0419726	0.376208
LEUER_G0000716	setbp1	522.463	-1.99438	0.042017	0.376208
LEUER_G0003542	ccm2	115.734	-3.3089	0.0423481	0.378755
LEUER_G0014889	plekhm2	396.02	-3.21943	0.0425263	0.37993
LEUER_G0014456	chaf1a	455.714	-2.47296	0.0425799	0.379991
LEUER_G0008797	loxl4	81.4974	-3.79091	0.0427344	0.380951
LEUER_G0006775	cnot8	74.9854	3.99498	0.0429139	0.382131
LEUER_G0009185	myo1d	312.929	-7.59527	0.0430428	0.382859
LEUER_G0004246	slitrk5	591.878	-2.31984	0.0432177	0.383995
LEUER_G0003180	daam2	78.7427	-4.40657	0.0432855	0.384176
LEUER_G0010473	rfx4	252.326	-3.17144	0.0434505	0.38522
LEUER_G0005950	fkbp3	164.185	-3.15508	0.0437301	0.386724
LEUER_G0000836	pias2	537.231	2.32728	0.0437488	0.386724
LEUER_G0011492	axin1	708.085	-1.97979	0.043763	0.386724
LEUER_G0001748	foxc1	60.4381	-5.52028	0.0439532	0.387982
LEUER_G0011935	LOC116986208	156.719	3.2162	0.0440376	0.388305
LEUER_G0006378	LOC116977738	66.4479	5.00125	0.0441327	0.388722
LEUER_G0006531	rad54l	210.492	3.26438	0.0443754	0.390436
LEUER_G0002212	sh3rf1	436.342	-2.10884	0.0444735	0.390876
LEUER_G0016332	gga1	79.807	3.5333	0.0445805	0.391261
LEUER_G0014140	polrmt	78.1362	4.40423	0.0446143	0.391261
LEUER_G0011852	ptprt	232.01	-4.48768	0.0446618	0.391261
LEUER_G0009519	zfhx3	5208.38	-1.66955	0.0450052	0.393491
LEUER_G0002674	jph1	70.2488	-5.25396	0.0450134	0.393491
LEUER_G0001685	zdhhc3	83.5321	3.1415	0.0452433	0.394908
LEUER_G0011999	LOC116986274	134.668	3.21231	0.0452726	0.394908
LEUER_G0010980	trim44	144.842	-3.19969	0.0454384	0.395928
LEUER_G0002779	ankrd29	47.0007	-5.14754	0.0457468	0.398188
LEUER_G0008528	spag17	254.208	-3.01127	0.0457996	0.398221
LEUER_G0014685	tmem201	223.248	3.40211	0.0458861	0.398547
LEUER_G0005568	pcsk2	328.34	-3.06018	0.0462115	0.400944
LEUER_G0009511	nfat5	639.234	-2.07417	0.04632	0.401235
LEUER_G0005657	galnt16	151.731	3.37997	0.0463438	0.401235
LEUER_G0004921	adcy5	944.837	2.05112	0.0464417	0.401526
LEUER_G0011224	trmu	402.921	3.38118	0.0465553	0.401526
LEUER_G0012788	dgcr2	1112.45	2.06382	0.0465705	0.401526
LEUER_G0006239	LOC116977562	50.8702	5.61763	0.0465752	0.401526
LEUER_G0016128	LOC116966434	278.437	3.07494	0.0467205	0.402221
LEUER_G0012023	tcfl5	81.1488	3.8483	0.046755	0.402221
LEUER_G0015348	snx19	382.694	-2.4689	0.0468188	0.402345
LEUER_G0005901	armh4	888.443	2.03588	0.0469712	0.403228
LEUER_G0001767	anks6	183.818	3.47977	0.0477089	0.409128
LEUER_G0014215	eps15l1	932.179	2.50293	0.0479102	0.410233
LEUER_G0003208	parp1	1020.01	-2.69637	0.0479388	0.410233
LEUER_G0014139	LOC116989292	167.315	3.25556	0.0480262	0.410548
LEUER_G0008222	LOC116980480	89.0193	3.28837	0.0480846	0.410615
LEUER_G0001662	lztfl1	97.534	-3.54495	0.0483642	0.412569
LEUER_G0004122	LOC116974341	104.447	-3.9742	0.0484471	0.412709
LEUER_G0016873	LOC116967867	659.159	1.92507	0.0485191	0.412709
LEUER_G0013516	LOC116988430	764.933	2.0278	0.048533	0.412709
LEUER_G0003474	hddc2	41.7186	5.00951	0.0486411	0.413195
LEUER_G0010111	wdr82	79.1349	3.86835	0.0487834	0.413683
LEUER_G0017565	ube2q1	409.43	3.09651	0.0488004	0.413683
LEUER_G0002248	mxd4	81.6453	-3.71961	0.0488881	0.413994
LEUER_G0007714	LOC116979698	1376.75	1.80312	0.0491988	0.415997
LEUER_G0001793	pik3r4	387.725	3.37274	0.049227	0.415997
LEUER_G0013915	lrwd1	353.524	-3.21879	0.0494174	0.417171
LEUER_G0012163	LOC116986478	3300.03	1.70138	0.0495329	0.417295
LEUER_G0006710	rnf14	140.384	-3.15662	0.0495349	0.417295
LEUER_G0013522	pef1	147.906	2.61035	0.0496393	0.417662
LEUER_G0012237	LOC116986711	80.3348	-4.5126	0.0496812	0.417662
LEUER_G0000094	znf827	347.712	2.09153	0.0497882	0.418129
LEUER_G0005206	LOC116976054	234.881	3.3189	0.049859	0.41829
LEUER_G0016676	pcna	288.591	2.62734	0.0500359	0.418975
LEUER_G0016113	sgpl1	195.608	3.58981	0.0500887	0.418975
LEUER_G0004027	tmem135	104.016	4.3497	0.0500954	0.418975
LEUER_G0011722	pigq	607.737	-2.68687	0.0501812	0.419261
LEUER_G0005765	churc1	71.8078	-3.91295	0.0503504	0.420083
LEUER_G0004741	fn1	1600.41	-2.35699	0.050383	0.420083
LEUER_G0002485	dipk1c	32.2149	6.3887	0.0506909	0.422216
LEUER_G0010790	parva	85.329	-4.93046	0.0510718	0.424953
LEUER_G0001143	nfx1	311.848	-2.43298	0.0511943	0.425536
LEUER_G0007081	LOC116978696	209.661	3.30771	0.0514543	0.427232
LEUER_G0005671	drc7	226.592	-3.20578	0.0515343	0.427232
LEUER_G0010361	shisal1	276.686	3.55344	0.0516332	0.427232
LEUER_G0005549	aftph	103.485	-3.78189	0.0516336	0.427232
LEUER_G0012545	psma5	760.177	2.0421	0.0517483	0.427232
LEUER_G0011825	LOC116986014	477.502	2.80042	0.051757	0.427232
LEUER_G0006016	btbd6	379.456	-2.56966	0.0517913	0.427232
LEUER_G0015470	LOC116991359	387.035	2.92034	0.0518192	0.427232
LEUER_G0012731	LOC116987390	44.0451	5.69543	0.0519954	0.42825
LEUER_G0016051	ndst2	337.236	2.88665	0.0522489	0.429222
LEUER_G0004161	sgcg	29.2739	6.04354	0.0522506	0.429222
LEUER_G0004179	gpr12	37.1538	5.49872	0.052272	0.429222
LEUER_G0010267	LOC116983651	55.3062	4.7285	0.0523959	0.429805
LEUER_G0010544	tdg	791.948	-2.28604	0.052544	0.430585
LEUER_G0017865	dmtn	140.644	-2.99179	0.0526436	0.430966
LEUER_G0009077	med1	323.338	-2.46863	0.0527106	0.43108
LEUER_G0013141	socs3	123.679	-3.82693	0.0528209	0.431548
LEUER_G0010593	ptprb	133.945	-4.61416	0.0529487	0.432157
LEUER_G0008631	zranb1	1152.8	-1.79167	0.0531715	0.43354
LEUER_G0012475	pik3c2b	2109.13	-2.05872	0.0532308	0.43357
LEUER_G0004086	c6h2orf49	151.602	3.20216	0.0532819	0.43357
LEUER_G0010511	ppp1r12a	1476.37	-1.80227	0.0533812	0.433942
LEUER_G0012107	mybl2	500.854	-2.21919	0.0535371	0.434775
LEUER_G0016275	dnajc9	168.69	2.88978	0.0536381	0.435102
LEUER_G0010211	poc1a	351.913	-2.98037	0.0536975	0.435102
LEUER_G0006787	fam13b	166.54	3.13067	0.0537501	0.435102
LEUER_G0003758	shprh	955.264	-2.97751	0.0538257	0.435102
LEUER_G0009532	hsd17b2	204.165	-3.56929	0.0538453	0.435102
LEUER_G0014377	lsm4	194.109	-2.49297	0.0540056	0.43579
LEUER_G0001140	gabbr2	110.166	-3.21088	0.0540378	0.43579
LEUER_G0012709	emid1	43.8612	-5.2457	0.0541603	0.436345
LEUER_G0005598	wars1	159.018	3.25243	0.0542325	0.436368
LEUER_G0008633	abraxas2	287.584	2.42641	0.0542707	0.436368
LEUER_G0000497	pcdh7	1553.64	1.66789	0.0544041	0.437008
LEUER_G0014455	ubxn6	288.171	-3.35125	0.0548971	0.440533
LEUER_G0011540	LOC116985682	78.084	-4.68689	0.0550154	0.440929
LEUER_G0001593	id4	3249.78	1.69779	0.0551081	0.440929
LEUER_G0001961	tut7	752.62	-1.78491	0.0551093	0.440929
LEUER_G0006154	tada1	448.005	3.422	0.0552511	0.441296
LEUER_G0003269	ptk7	364.677	-2.25039	0.0552842	0.441296
LEUER_G0007814	amotl2	75.3608	-4.01452	0.0553814	0.441296
LEUER_G0013049	map2k4	517.832	-2.70924	0.0554226	0.441296
LEUER_G0013335	pctp	99.4197	4.80206	0.0554269	0.441296
LEUER_G0003470	nkain2	223.78	2.98863	0.055814	0.443943
LEUER_G0007657	actl6a	425.817	2.08909	0.0560221	0.445162
LEUER_G0005758	tmem187	129.982	2.85751	0.0562461	0.44603
LEUER_G0006889	slu7	236.322	-2.23019	0.0562621	0.44603
LEUER_G0010345	fam118a	492.364	-2.21703	0.0562961	0.44603
LEUER_G0002150	elp1	295.73	-2.83643	0.0564723	0.446809
LEUER_G0016631	nsd3	1917.36	-2.54522	0.0565044	0.446809
LEUER_G0012236	lrig2	197.083	3.16998	0.0565607	0.446818
LEUER_G0012456	kcnd3	178.963	-3.4376	0.0567942	0.448093
LEUER_G0004300	pcca	345.146	2.12206	0.0568414	0.448093
LEUER_G0008859	arid5b	1116.96	2.08577	0.0569173	0.448093
LEUER_G0004176	LOC116974395	37.5197	5.35565	0.0569781	0.448093
LEUER_G0010430	LOC116974125	341.299	-3.25556	0.0569979	0.448093
LEUER_G0010933	LOC116984406	136.676	4.60015	0.0571237	0.448648
LEUER_G0007448	pak3	322.962	-2.37978	0.0571957	0.448779
LEUER_G0003204	degs1	279.09	2.58275	0.0574585	0.450305
LEUER_G0013741	wsb1	180.273	2.39928	0.057501	0.450305
LEUER_G0016514	smdt1	110.029	3.1962	0.0576181	0.450787
LEUER_G0017022	snrpd2	419.197	2.64192	0.057683	0.45086
LEUER_G0005922	cnih1	73.7472	3.72738	0.0578987	0.452111
LEUER_G0000396	ptpn13	169.457	-3.98104	0.0579645	0.45219
LEUER_G0003487	echdc1	1163.67	-2.27614	0.0580541	0.452339
LEUER_G0003665	mboat2	72.6739	3.66751	0.0581243	0.452339
LEUER_G0015108	LOC116990927	183.546	-3.34398	0.0581508	0.452339
LEUER_G0006675	rnpc3	116.58	4.39989	0.0584321	0.453098
LEUER_G0005104	prox1	580.574	-1.83293	0.0584836	0.453098
LEUER_G0013821	pitpna	207.381	-2.86837	0.0584857	0.453098
LEUER_G0015649	cemip	32.7119	5.42235	0.0585216	0.453098
LEUER_G0009941	cntn3	292.599	-2.19613	0.0585272	0.453098
LEUER_G0001798	ankrd33b	578.219	-2.80816	0.0587027	0.454023
LEUER_G0008712	cacul1	140.46	-3.16388	0.0587951	0.454146
LEUER_G0002059	zcchc7	816.89	-2.73396	0.0588533	0.454146
LEUER_G0011945	snai1	45.161	-5.06831	0.0588863	0.454146
LEUER_G0013148	cog1	153.613	2.65393	0.0591932	0.455183
LEUER_G0008836	rrp12	697.328	-2.43304	0.0592519	0.455183
LEUER_G0010690	LOC116984480	1776.75	1.8439	0.0592593	0.455183
LEUER_G0005600	dlk1	269.793	2.05837	0.0593099	0.455183
LEUER_G0006274	smg7	987.914	-1.90984	0.059324	0.455183
LEUER_G0003756	lats1	328.726	2.27438	0.059357	0.455183
LEUER_G0004301	ggact	148.725	3.40921	0.059425	0.455274
LEUER_G0009153	mrpl10	78.2588	3.43242	0.0595151	0.455534
LEUER_G0014452	sema6b	306.811	-2.17479	0.0597534	0.456928
LEUER_G0004055	rev1	1230.69	-2.29031	0.0601665	0.459654
LEUER_G0016115	gbf1	531.056	1.81611	0.0602417	0.459796
LEUER_G0001511	rab5a	581.388	-2.04629	0.0604855	0.460986
LEUER_G0007766	LOC116979760	423.782	-2.46013	0.0605112	0.460986
LEUER_G0012152	c23h20orf85	994.726	1.94123	0.0605824	0.461096
LEUER_G0002523	nsmce2	164.429	-2.74886	0.0607287	0.461755
LEUER_G0015856	col5a3	114.599	-3.724	0.0607827	0.461755
LEUER_G0002533	riok1	114.431	-2.82465	0.0612282	0.46454
LEUER_G0008332	igsf3	648.311	2.12599	0.0612637	0.46454
LEUER_G0003354	pcdh8	159.875	-2.38179	0.0613726	0.464655
LEUER_G0001245	epc1	284.811	-2.11251	0.0613933	0.464655
LEUER_G0016164	fbxl15	400.355	3.14718	0.061594	0.465426
LEUER_G0005353	LOC116976221	33.4261	-5.66928	0.0616372	0.465426
LEUER_G0017105	LOC116968340	789.652	-2.30238	0.0617213	0.465426
LEUER_G0013597	smim12	67.0075	4.51996	0.0617244	0.465426
LEUER_G0014693	samd11	170.705	-3.07146	0.0618602	0.465945
LEUER_G0016817	LOC116979611	29.2469	6.25116	0.0619481	0.465945
LEUER_G0016684	aak1	1451.62	2.06063	0.0619653	0.465945
LEUER_G0005274	prkn	181.761	-3.06268	0.062206	0.466906
LEUER_G0007928	chst2	923.241	-2.85513	0.0622383	0.466906
LEUER_G0000726	hint2	33.1826	-6.07657	0.0622657	0.466906
LEUER_G0009667	LOC116982691	172.983	-3.15808	0.0623294	0.466953
LEUER_G0013890	mdh2	533.371	2.27952	0.062425	0.467222
LEUER_G0010371	ptprz1	3572.98	1.66731	0.0625598	0.467222
LEUER_G0005460	mthfd1l	380.338	2.14569	0.06256	0.467222
LEUER_G0017404	bloc1s1	204.699	2.54704	0.0625954	0.467222
LEUER_G0008676	tcf7l2	185.767	-3.31794	0.0628591	0.467597
LEUER_G0010115	uba7	109.307	-4.54006	0.0628746	0.467597
LEUER_G0002685	kcnb2	182.401	3.16361	0.0628893	0.467597
LEUER_G0006835	gprin1	255	3.04188	0.0628913	0.467597
LEUER_G0006895	ttc1	98.9505	2.85194	0.0629981	0.467597
LEUER_G0014449	mydgf	208.222	2.22593	0.0630452	0.467597
LEUER_G0012157	gnas	229.547	-2.46565	0.0630487	0.467597
LEUER_G0013855	LOC116989157	322.847	-2.25504	0.0632269	0.468491
LEUER_G0007505	LOC116979353	92.9889	4.80233	0.0633327	0.468847
LEUER_G0003874	uvrag	2385.97	-2.30029	0.0635326	0.469898
LEUER_G0001770	exoc3	133.527	3.46389	0.0636932	0.470512
LEUER_G0001942	tle1	431.925	-2.36599	0.0637315	0.470512
LEUER_G0010611	tmtc2	271.021	-2.85499	0.0639596	0.471768
LEUER_G0011113	nudt4	147.57	3.86899	0.0641476	0.472574
LEUER_G0003396	gpr63	59.5514	3.97854	0.0641853	0.472574
LEUER_G0002878	plag1	73.2149	-3.98184	0.06443	0.473946
LEUER_G0005346	LOC116976213	89.9793	-4.18998	0.0645192	0.474172
LEUER_G0016093	mcu	113.432	3.00242	0.0646023	0.474354
LEUER_G0015772	LOC116966080	107.565	3.03822	0.0647573	0.475062
LEUER_G0004174	atp8a2	238.378	-2.41952	0.0649059	0.475723
LEUER_G0014721	cfap74	37.9794	-3.85214	0.0651917	0.477387
LEUER_G0002724	spire1	416.781	2.73147	0.065465	0.478765
LEUER_G0016488	josd1	72.186	-4.32504	0.0654979	0.478765
LEUER_G0012661	mlxip	350.719	2.3146	0.0659367	0.479976
LEUER_G0012087	LOC116986378	107.978	3.27284	0.0659415	0.479976
LEUER_G0016231	LOC116966447	46.8772	4.07851	0.0659674	0.479976
LEUER_G0000224	dgkq	414.543	-1.96665	0.0660066	0.479976
LEUER_G0003910	arglu1	724.131	1.714	0.0660719	0.479976
LEUER_G0006865	stk10	100.166	-3.15703	0.0661135	0.479976
LEUER_G0017144	fam219b	35.6223	-5.77327	0.0661487	0.479976
LEUER_G0005162	fh	144.421	2.6903	0.0661619	0.479976
LEUER_G0012856	prkab1	713.247	3.52124	0.066244	0.479976
LEUER_G0010996	cd151	222.591	2.97938	0.0662546	0.479976
LEUER_G0008580	btaf1	436.252	-1.97025	0.0666511	0.482419
LEUER_G0002902	armc1	1208.64	-2.59996	0.0667898	0.482528
LEUER_G0012976	tctn2	140.777	-3.50077	0.0668168	0.482528
LEUER_G0008325	gdf3	69.1596	-4.22717	0.066889	0.482528
LEUER_G0001885	trim36	172.892	3.72709	0.0669174	0.482528
LEUER_G0017102	mphosph10	226.561	2.89132	0.0669634	0.482528
LEUER_G0008735	sfxn3	465.03	-2.30353	0.0670891	0.482601
LEUER_G0013542	rcan3	170.52	2.46199	0.0671064	0.482601
LEUER_G0003019	LOC116972456	125.889	3.46042	0.0671518	0.482601
LEUER_G0010770	arl14ep	33.1119	-5.33816	0.0673126	0.48333
LEUER_G0016857	LOC116967788	138.421	-3.14418	0.0674031	0.483552
LEUER_G0016039	drgx	231.143	-3.34431	0.0677212	0.485405
LEUER_G0009480	tubb3	3482.39	1.59472	0.0678626	0.485525
LEUER_G0008280	enox1	221.977	2.46043	0.0678767	0.485525
LEUER_G0008476	dzip3	424.477	2.41314	0.0679173	0.485525
LEUER_G0003246	agpat5	140.807	-3.56724	0.0680455	0.485678
LEUER_G0002373	pde8b	329.527	2.31456	0.0680583	0.485678
LEUER_G0004512	ankrd44	141.907	-3.10618	0.0681534	0.48593
LEUER_G0015493	ntrk3	234.836	3.01049	0.0682342	0.486079
LEUER_G0007959	mff	271.148	2.40183	0.0683244	0.486088
LEUER_G0017526	LOC116968911	147.411	3.11697	0.0683844	0.486088
LEUER_G0005345	LOC116976212	60.4897	-4.32759	0.0684151	0.486088
LEUER_G0015221	hspa5	1537.06	1.80363	0.0685098	0.486336
LEUER_G0002231	lrpap1	1249.95	-2.1649	0.0687798	0.487826
LEUER_G0009345	spop	42.9017	4.33803	0.0689661	0.4885
LEUER_G0017055	fis1	45.4281	4.29388	0.0689952	0.4885
LEUER_G0006590	glmn	75.3007	3.66438	0.0690826	0.488693
LEUER_G0003513	ptchd4	415.811	2.04581	0.069147	0.488723
LEUER_G0014813	slc45a1	694.023	2.6912	0.0692463	0.488976
LEUER_G0001819	edil3	1133.67	1.90585	0.0693031	0.488976
LEUER_G0017185	ubl7	1039.98	2.06407	0.0695874	0.490367
LEUER_G0004564	neurod1	163.893	-3.1449	0.0696789	0.490367
LEUER_G0005452	rab32	131.896	-3.21409	0.0696815	0.490367
LEUER_G0004785	gbx2	151.524	-2.98767	0.0697551	0.49046
LEUER_G0011628	srebf1	468.301	1.99724	0.0698596	0.49077
LEUER_G0016600	elmod3	206.757	-2.69609	0.0701187	0.492164
LEUER_G0016585	LOC116967274	1160.07	1.7819	0.0702006	0.492299
LEUER_G0014177	LOC116989340	4221.15	1.52148	0.0702591	0.492299
LEUER_G0006518	ttc4	97.7983	-3.18945	0.0706453	0.494578
LEUER_G0017277	ice2	285.543	-2.30324	0.0708852	0.49583
LEUER_G0001172	ackr2	84.0148	-4.59187	0.0710911	0.496843
LEUER_G0010719	prmt3	185.673	3.07137	0.0713246	0.497955
LEUER_G0008725	dusp5	161.323	-3.70593	0.071373	0.497955
LEUER_G0000504	pgm2	247.175	-2.37784	0.0716687	0.499589
LEUER_G0017399	LOC116968807	224.299	2.67465	0.0717794	0.499932
LEUER_G0011144	pde3a	292.307	-3.48019	0.0719064	0.499983
LEUER_G0004542	wdr75	42.0171	4.9861	0.0719099	0.499983
LEUER_G0000133	egf	186.665	-3.16853	0.0721314	0.501094
LEUER_G0005509	plcb1	285.683	-2.41172	0.0722351	0.501386
LEUER_G0006038	dglucy	176.625	-3.46989	0.0725437	0.503098
LEUER_G0011187	LOC116984905	218.204	-3.13768	0.0727123	0.503836
LEUER_G0011532	bri3	119.184	-3.52042	0.0728578	0.504122
LEUER_G0017236	LOC116968185	340.489	2.42365	0.072882	0.504122
LEUER_G0002650	csmd3	470.438	2.68907	0.0729397	0.504122
LEUER_G0005766	gpx2	62.7586	3.70809	0.0730977	0.504527
LEUER_G0001904	lox	133.321	-3.48307	0.0731226	0.504527
LEUER_G0015557	tle3	674.356	-2.14512	0.0732598	0.505045
LEUER_G0006846	cplx2	2043.75	1.50183	0.0734706	0.506069
LEUER_G0001949	kif27	427.181	3.22557	0.0737442	0.506728
LEUER_G0014005	appbp2	345.64	2.178	0.0737497	0.506728
LEUER_G0013225	rsad1	302.421	-3.29861	0.0737535	0.506728
LEUER_G0007303	nsdhl	146.293	2.97352	0.0742961	0.510024
LEUER_G0015550	map2k5	84.7432	3.10491	0.0743879	0.510223
LEUER_G0006254	axdnd1	121.464	-3.29357	0.0746614	0.511517
LEUER_G0007873	dhx36	580.074	-2.21115	0.0747025	0.511517
LEUER_G0005474	dtd1	293.093	2.52648	0.0748113	0.511831
LEUER_G0003765	LOC116973617	512.234	-2.40681	0.0751068	0.51342
LEUER_G0007631	ccnl1	64.2977	3.79296	0.075243	0.513918
LEUER_G0008420	LOC116980721	47.0236	4.69833	0.0754966	0.515217
LEUER_G0011981	ctnnbl1	123.228	-2.5785	0.0756085	0.515547
LEUER_G0008253	cdadc1	128.728	3.2234	0.0757588	0.516138
LEUER_G0005144	slc30a6	168.091	2.75865	0.075867	0.516227
LEUER_G0008292	esd	176.437	3.07642	0.075899	0.516227
LEUER_G0011140	recql	541.508	1.92806	0.0759945	0.516445
LEUER_G0002469	nup155	216.035	2.51353	0.0761494	0.517065
LEUER_G0005369	ints9	718.324	-2.12564	0.0762598	0.517347
LEUER_G0011853	soga1	1931.53	-1.9135	0.0763773	0.517347
LEUER_G0000294	nrg1	402.495	2.69133	0.0764443	0.517347
LEUER_G0012636	aacs	1020.37	1.83454	0.0765224	0.517347
LEUER_G0005670	LOC116976770	677.627	1.96225	0.0765404	0.517347
LEUER_G0016980	clip3	1130.57	1.99418	0.0765732	0.517347
LEUER_G0008086	adamts1	578.702	-2.58047	0.0767308	0.517913
LEUER_G0010124	gnai2	762.076	1.70423	0.0767846	0.517913
LEUER_G0007475	LOC116979253	298.69	2.78811	0.0771722	0.519701
LEUER_G0011988	LOC116986263	69.9588	-3.2631	0.0771828	0.519701
LEUER_G0012645	denr	109.431	2.80086	0.0772416	0.519701
LEUER_G0010683	bet1l	348.985	3.14273	0.0774979	0.520483
LEUER_G0001553	adam22	810.799	1.74146	0.0775467	0.520483
LEUER_G0002451	LOC116971611	1210.94	-1.91399	0.0775689	0.520483
LEUER_G0001610	rbfa	74.0313	4.31338	0.0776141	0.520483
LEUER_G0007419	LOC116979197	101.426	-2.93625	0.0776906	0.520565
LEUER_G0000080	nr3c2	36.5037	-5.46894	0.0779245	0.521702
LEUER_G0009638	necab2	345.465	1.92687	0.0780593	0.522078
LEUER_G0004602	lnpk	336.522	2.06988	0.0781091	0.522078
LEUER_G0008315	pcid2	441.26	-2.41001	0.0785538	0.524513
LEUER_G0012477	plekha6	228.479	-3.32693	0.0786027	0.524513
LEUER_G0001226	adarb2	182.614	-2.8212	0.0789117	0.526143
LEUER_G0005866	mbip	33.3967	5.69826	0.0791023	0.526981
LEUER_G0017468	cdk2	152.949	-3.0674	0.0794167	0.528273
LEUER_G0016476	tnrc6b	10637.4	-1.90272	0.0794263	0.528273
LEUER_G0015107	urm1	123.132	-3.7797	0.0796225	0.529131
LEUER_G0011504	epn2	1003.25	-1.95812	0.0797931	0.529131
LEUER_G0013593	LOC116988541	112.283	3.35906	0.0798325	0.529131
LEUER_G0012115	adrm1	219.338	2.17877	0.0798508	0.529131
LEUER_G0008069	LOC116980280	834.073	-2.19958	0.0799353	0.529131
LEUER_G0005352	LOC116976219	224.637	-3.32547	0.0799463	0.529131
LEUER_G0003849	nphp1	82.0659	3.52646	0.0803425	0.53132
LEUER_G0011250	mapk11	414.321	-2.12434	0.080588	0.531736
LEUER_G0006955	mrpl22	39.8599	-4.74062	0.0806431	0.531736
LEUER_G0007839	eif5a2	761.016	2.03201	0.0807951	0.531736
LEUER_G0013932	tmem132e	493.814	1.88009	0.0808043	0.531736
LEUER_G0006809	rufy1	233.455	-2.34946	0.0808297	0.531736
LEUER_G0004275	dis3	93.0552	-3.01661	0.0808641	0.531736
LEUER_G0007802	LOC116979802	30.7857	5.756	0.0809559	0.531736
LEUER_G0009247	becn1	64.9584	-3.52396	0.0809877	0.531736
LEUER_G0001453	frrs1l	66.4277	2.91619	0.0809947	0.531736
LEUER_G0013375	LOC116988287	157.535	-3.18263	0.0811733	0.532278
LEUER_G0002894	LOC116972300	85.9924	-3.58958	0.0812082	0.532278
LEUER_G0015739	chsy1	239.109	2.87887	0.0815813	0.533385
LEUER_G0006440	btf3l4	322.104	-2.7048	0.0816032	0.533385
LEUER_G0007283	brcc3	126.722	-2.44669	0.0816272	0.533385
LEUER_G0008052	wdr4	230.941	-2.39874	0.0816399	0.533385
LEUER_G0010730	ccnd1	1109.01	-2.46719	0.0819337	0.534874
LEUER_G0004919	pdia5	142.601	-2.76256	0.0821433	0.535249
LEUER_G0007577	farsb	85.0649	3.28395	0.0821726	0.535249
LEUER_G0011623	mprip	71.8241	-4.08258	0.0821889	0.535249
LEUER_G0004413	prkx	356.608	-2.47353	0.0822868	0.535458
LEUER_G0015318	mcam	498.224	-2.09858	0.0826393	0.536937
LEUER_G0006299	pgm1	111.234	2.53859	0.0826464	0.536937
LEUER_G0008360	fundc1	462.473	-2.76974	0.0829358	0.538187
LEUER_G0013449	zcchc17	659.095	1.93103	0.0829714	0.538187
LEUER_G0009609	uba2	311.443	2.26701	0.0833411	0.539589
LEUER_G0011604	tedc2	158.603	2.71618	0.0834078	0.539589
LEUER_G0014900	ccdc30	390.803	-2.2549	0.083409	0.539589
LEUER_G0013387	LOC116988206	66.8158	3.51359	0.0834533	0.539589
LEUER_G0014015	txndc17	338.352	-2.18247	0.0837242	0.540776
LEUER_G0009586	LOC116982594	154.932	-2.87469	0.0838192	0.540776
LEUER_G0008277	nufip1	77.4628	-4.14001	0.0838366	0.540776
LEUER_G0002662	stmn2	3308.47	1.79741	0.0840275	0.541577
LEUER_G0008547	LOC116980958	144.346	-2.44913	0.0841287	0.541799
LEUER_G0017104	tjp1	2985.15	-1.83994	0.0842546	0.54193
LEUER_G0009481	def8	143.834	2.87032	0.0843281	0.54193
LEUER_G0016422	rangap1	257.512	2.81194	0.0844098	0.54193
LEUER_G0002458	LOC116971526	61.3378	4.23833	0.084484	0.54193
LEUER_G0012393	LOC116986887	1241.78	-1.5794	0.0847446	0.54193
LEUER_G0010503	nup37	97.9689	4.3129	0.084781	0.54193
LEUER_G0000026	intu	50.9372	-4.43207	0.0848232	0.54193
LEUER_G0014224	tmem38a	54.2064	4.2397	0.0848497	0.54193
LEUER_G0006355	rasal2	1151.86	1.69107	0.0849102	0.54193
LEUER_G0010356	kiaa0930	140.189	-2.80145	0.0849311	0.54193
LEUER_G0011643	micall2	143.842	2.69821	0.0849924	0.54193
LEUER_G0016400	LOC116967037	155.816	2.3429	0.0850464	0.54193
LEUER_G0007659	ndufb5	324.21	-2.40993	0.0851512	0.54193
LEUER_G0004558	nckap1	568.603	-2.15469	0.0852054	0.54193
LEUER_G0012806	LOC116987464	590.812	-2.21578	0.0852651	0.54193
LEUER_G0000467	slit2	4088.71	1.56303	0.0853273	0.54193
LEUER_G0015606	gabpb1	63.0879	-3.54858	0.0853573	0.54193
LEUER_G0012787	ess2	903.958	1.61165	0.0853913	0.54193
LEUER_G0005961	ttc8	186.779	-2.30387	0.0854169	0.54193
LEUER_G0013534	snrpc	68.7581	3.72324	0.085565	0.542446
LEUER_G0015779	acp5	67.7063	-4.19511	0.0856828	0.542634
LEUER_G0004282	mettl18	31.993	-5.61538	0.0857284	0.542634
LEUER_G0013561	LOC116988489	775.312	2.48402	0.0858141	0.542754
LEUER_G0003186	klhdc3	63.122	4.37054	0.0860801	0.544013
LEUER_G0017272	rab8b	157.609	3.76646	0.0864118	0.545018
LEUER_G0008058	trappc10	52.577	-4.48895	0.0864832	0.545018
LEUER_G0013121	chmp6	193.061	-2.4603	0.086492	0.545018
LEUER_G0014664	espn	82.173	-3.57262	0.0865075	0.545018
LEUER_G0010374	cadps2	147.077	-3.40562	0.0866985	0.545797
LEUER_G0001625	atxn1	54.0304	-3.34771	0.086828	0.546189
LEUER_G0011690	drg2	83.0561	3.44776	0.0869099	0.546281
LEUER_G0009639	LOC116982984	203.446	-2.40464	0.0872092	0.547393
LEUER_G0008654	plekha1	294.566	2.17054	0.0872238	0.547393
LEUER_G0006456	lurap1	61.0926	2.99258	0.087348	0.547393
LEUER_G0010404	LOC116983831	3199.97	1.49855	0.0873564	0.547393
LEUER_G0008754	cnnm2	195.93	-2.9057	0.0875095	0.54766
LEUER_G0010141	lhfpl4	1323.86	1.93903	0.0875339	0.54766
LEUER_G0002986	ints8	111.11	3.44732	0.0876181	0.547765
LEUER_G0008395	zbtb20	851.413	1.58802	0.0880056	0.548695
LEUER_G0010129	LOC116983364	58.8987	3.2036	0.0881254	0.548695
LEUER_G0004942	LOC116975598	1593.78	1.47952	0.0881389	0.548695
LEUER_G0009885	flnb	1533.86	-1.56289	0.0882055	0.548695
LEUER_G0004349	ppme1	257.72	-1.99133	0.0882488	0.548695
LEUER_G0012638	tmem132c	543.685	2.725	0.0882656	0.548695
LEUER_G0006884	bnip1	55.2279	3.07329	0.0882711	0.548695
LEUER_G0009942	chl1	2021.46	1.50784	0.0883073	0.548695
LEUER_G0016089	nudt13	36.5818	-4.77383	0.0886972	0.550696
LEUER_G0001978	sass6	250.724	-2.43948	0.0890152	0.551899
LEUER_G0017421	os9	65.6797	-3.51382	0.089077	0.551899
LEUER_G0002201	LOC116971245	299.03	-2.76975	0.0890949	0.551899
LEUER_G0013717	rflnb	54.7679	4.84758	0.0891997	0.552127
LEUER_G0002087	saraf	396.406	-2.54338	0.0892843	0.55223
LEUER_G0010181	LOC116983439	50.7899	-4.34	0.08955	0.553404
LEUER_G0015437	esam	249.289	-3.87421	0.0897472	0.553404
LEUER_G0004338	arhgef17	382.1	2.39665	0.0897969	0.553404
LEUER_G0005833	zfyve21	134.326	-3.10852	0.0898096	0.553404
LEUER_G0015208	adgrd2	179.467	2.84228	0.0898149	0.553404
LEUER_G0001398	trio	2848.74	-1.69529	0.0906498	0.556939
LEUER_G0007816	bcl6	63.3346	4.19742	0.0907148	0.556939
LEUER_G0010801	lyve1	64.4115	-4.26473	0.090821	0.556939
LEUER_G0002669	zfhx4	4454.16	-1.36381	0.0908877	0.556939
LEUER_G0007617	LOC116980122	122.726	-3.72998	0.0910064	0.556939
LEUER_G0005540	wdpcp	83.8727	2.81804	0.0910933	0.556939
LEUER_G0000772	dctn3	189.506	2.3149	0.0911099	0.556939
LEUER_G0010354	fgd4	217.29	-2.2459	0.0911126	0.556939
LEUER_G0001433	basp1	6718.91	1.42092	0.0911135	0.556939
LEUER_G0000146	spock3	386.633	-2.03833	0.0912067	0.556939
LEUER_G0006368	wdr78	193.586	-2.26326	0.0912426	0.556939
LEUER_G0012832	septin5	273.818	2.14799	0.0913492	0.556939
LEUER_G0011738	brat1	146.582	-3.6634	0.0914366	0.556939
LEUER_G0000803	tcf4	454.466	-2.17078	0.0915424	0.556939
LEUER_G0014861	atad3a	1157.12	1.91409	0.0916635	0.556939
LEUER_G0002244	fam193a	822.693	1.60115	0.0916962	0.556939
LEUER_G0011715	cdip1	71.5349	-3.46488	0.0916989	0.556939
LEUER_G0002023	LOC116971017	215.993	2.50291	0.0917068	0.556939
LEUER_G0011801	gna12	36.0839	-4.15188	0.0918051	0.556939
LEUER_G0016015	ap3m1	265.608	2.25036	0.0918181	0.556939
LEUER_G0006648	samd13	1335.42	-2.04315	0.0918287	0.556939
LEUER_G0001630	mcur1	33.7355	-5.35246	0.0921639	0.558299
LEUER_G0017464	ikzf4	243.734	-3.85439	0.0921904	0.558299
LEUER_G0014385	lmnb2	1968.84	-1.6194	0.0922683	0.558354
LEUER_G0011169	vwf	40.0641	-5.10997	0.0923691	0.558547
LEUER_G0001612	LOC116967458	258.147	2.61568	0.0925268	0.559085
LEUER_G0009528	gan	87.2618	-3.40067	0.0928438	0.560057
LEUER_G0005419	LOC116976302	104.562	-2.56811	0.0929078	0.560057
LEUER_G0004659	kcnj3	126.635	-2.91259	0.0929859	0.560057
LEUER_G0002472	nipbl	1737.65	-1.79833	0.0930861	0.560057
LEUER_G0000519	ube2k	146.327	2.55176	0.0931177	0.560057
LEUER_G0002554	mbp	173.835	3.70256	0.0931352	0.560057
LEUER_G0014671	casz1	982.334	-2.21361	0.0933156	0.560057
LEUER_G0006351	angptl1	31.8046	-4.83739	0.093417	0.560057
LEUER_G0010205	erh	244.856	2.40038	0.093419	0.560057
LEUER_G0001527	gpd1l	105.147	-3.91709	0.0934502	0.560057
LEUER_G0015143	ddx31	59.9428	-3.842	0.0934679	0.560057
LEUER_G0012097	plcg1	731.557	-1.62199	0.0935153	0.560057
LEUER_G0007294	LOC116979054	218.754	2.31648	0.0939886	0.562477
LEUER_G0014784	ski	977.775	-1.61869	0.0942806	0.563713
LEUER_G0005900	actr10	45.6935	3.29237	0.0944726	0.563713
LEUER_G0016699	LOC116967511	160.316	-3.36642	0.0945694	0.563713
LEUER_G0009364	gpatch8	3154.34	1.55528	0.0945838	0.563713
LEUER_G0013325	mbtd1	326.121	-2.25791	0.094655	0.563713
LEUER_G0005288	dstn	294.061	2.50555	0.094714	0.563713
LEUER_G0004718	tra2b	431.336	2.14314	0.0947866	0.563713
LEUER_G0017201	LOC116968319	106.998	2.9916	0.0950462	0.563713
LEUER_G0016737	LOC116967488	178.238	-2.69656	0.0950553	0.563713
LEUER_G0013694	sh2b2	45.5586	3.82809	0.0950557	0.563713
LEUER_G0004653	mylk	96.9615	-2.70526	0.0950678	0.563713
LEUER_G0014891	fblim1	306.633	-2.49852	0.0950719	0.563713
LEUER_G0004170	amer2	752.543	1.67114	0.0950976	0.563713
LEUER_G0006944	cd74	612.328	2.33481	0.0955767	0.56614
LEUER_G0005119	bpnt1	37.1426	-4.69656	0.0957266	0.56638
LEUER_G0011716	polr3k	61.0067	3.64887	0.0957567	0.56638
LEUER_G0004941	stk16	85.6394	3.85471	0.0958413	0.566468
LEUER_G0013804	kiaa0100	310.987	-2.8454	0.096154	0.567903
LEUER_G0013187	actg1	6291.4	1.33695	0.0966367	0.570245
LEUER_G0002798	chpf2	1166.74	-1.85339	0.0967007	0.570245
LEUER_G0008310	apoo	223.492	-2.38124	0.0968211	0.570245
LEUER_G0002614	stard3nl	195.252	-3.12251	0.0968314	0.570245
LEUER_G0004099	ccdc138	58.8021	-3.81457	0.0969212	0.57036
LEUER_G0007160	col4a6	599.283	-1.9737	0.0973053	0.572152
LEUER_G0006094	bcl11b	2506.8	-1.52909	0.0973695	0.572152
LEUER_G0015213	wdr38	52.8924	3.09454	0.0974371	0.572152
LEUER_G0012289	syt2	2009.34	1.42871	0.0977591	0.573211
LEUER_G0013712	vezf1	900.9	-1.64729	0.0978075	0.573211
LEUER_G0008193	jagn1	262.585	2.07501	0.0978746	0.573211
LEUER_G0010846	swap70	131.799	-2.91111	0.0978997	0.573211
LEUER_G0016950	LOC116967699	243.717	2.84963	0.0982048	0.574583
LEUER_G0013424	eya3	390.921	-1.9488	0.0984054	0.575342
LEUER_G0013090	smurf2	1631.34	-2.0065	0.0988135	0.577313
LEUER_G0000484	LOC116976635	120.968	-4.05935	0.0990805	0.578457
LEUER_G0012627	mtmr3	254.575	2.5539	0.0992115	0.578805
LEUER_G0000571	fip1l1	820.502	-2.135	0.0996993	0.581091
LEUER_G0012402	cept1	367.151	-2.5783	0.0998031	0.581091
LEUER_G0004860	r3hdm1	2602.28	1.56503	0.0998941	0.581091
LEUER_G0011001	pex16	130.325	3.52257	0.0999174	0.581091
LEUER_G0002648	LOC116972555	58.1905	4.07383	0.100016	0.581091
LEUER_G0008184	nit2	143.475	-2.70164	0.100066	0.581091
LEUER_G0017908	mob4	670.931	2.52507	0.100108	0.581091
LEUER_G0002063	polr1e	127.078	-2.28601	0.100176	0.581091
LEUER_G0008563	noc3l	60.3153	3.83797	0.100369	0.581411
LEUER_G0003854	cln8	296.981	2.46114	0.100374	0.581411
LEUER_G0014219	LOC116989393	35.1049	-5.15662	0.100593	0.582125
LEUER_G0012076	LOC116986367	31.2423	-4.39923	0.100697	0.582125
LEUER_G0009544	cotl1	280.693	2.16604	0.100712	0.582125
LEUER_G0010036	usp19	1170.87	-2.13953	0.100861	0.582568
LEUER_G0004238	abcc4	69.6188	2.98489	0.100966	0.582571
LEUER_G0003080	cspg5	822.967	1.65558	0.101005	0.582571
LEUER_G0006390	LOC116977756	96.6096	3.17018	0.101107	0.582741
LEUER_G0016693	lrrtm4	271.66	2.0611	0.101206	0.582741
LEUER_G0013875	atp2a3	177.123	-3.83768	0.101249	0.582741
LEUER_G0012326	LOC116986814	168.104	-2.32387	0.101447	0.58318
LEUER_G0004575	fkbp7	110.415	-3.29101	0.101469	0.58318
LEUER_G0011605	LOC116985759	63.7845	-3.5144	0.101569	0.583208
LEUER_G0010461	adamts20	89.8162	-3.39316	0.101648	0.583208
LEUER_G0006316	rc3h1	1899.95	-1.93922	0.10169	0.583208
LEUER_G0014051	ankrd13b	192.511	2.59032	0.101879	0.583586
LEUER_G0004292	gpr18	115.261	-3.62444	0.101901	0.583586
LEUER_G0016190	pax2	1510.89	-1.94545	0.101971	0.583586
LEUER_G0014768	ece1	49.4152	-3.92473	0.102147	0.584183
LEUER_G0007929	u2surp	422.839	-1.91358	0.102289	0.584557
LEUER_G0013189	slc38a10	666.139	-2.53861	0.102484	0.584557
LEUER_G0007190	slc25a43	72.5561	4.33044	0.102489	0.584557
LEUER_G0006359	LOC116977714	251.307	3.20594	0.102501	0.584557
LEUER_G0011466	clec16a	291.948	-2.38353	0.102585	0.584626
LEUER_G0011042	sox6	87.9025	-2.8611	0.10275	0.585154
LEUER_G0004523	nabp1	58.664	-3.89203	0.10313	0.586805
LEUER_G0004758	adam23	714.828	1.90524	0.103184	0.586805
LEUER_G0001762	brd9	228.328	-1.96714	0.103343	0.5873
LEUER_G0015687	LOC116991705	507.408	-1.78835	0.104014	0.590698
LEUER_G0014422	c29h6orf120	228.114	-2.8946	0.1041	0.590774
LEUER_G0008081	chodl	76.7278	3.37766	0.10424	0.590804
LEUER_G0002958	gli3	205.582	-2.66947	0.104352	0.590804
LEUER_G0008670	prdx3	178.695	2.39851	0.104418	0.590804
LEUER_G0001166	nktr	1044.8	1.7468	0.104443	0.590804
LEUER_G0016802	LOC116967415	1850.09	-1.76337	0.104469	0.590804
LEUER_G0016182	LOC116966349	667.974	2.42545	0.104598	0.591118
LEUER_G0004501	c7h2orf69	73.4909	3.77784	0.1047	0.591286
LEUER_G0003943	foxo1	78.6552	-3.35582	0.105014	0.592383
LEUER_G0017009	clasrp	412.687	-2.5632	0.105149	0.592383
LEUER_G0015055	endog	30.4088	-4.82597	0.105169	0.592383
LEUER_G0009659	vac14	612.019	1.64661	0.105186	0.592383
LEUER_G0001322	thrb	183.791	2.30282	0.105514	0.593106
LEUER_G0000062	dctn6	462.909	1.79916	0.105549	0.593106
LEUER_G0010257	lsmem1	32.3484	-4.79153	0.105695	0.593106
LEUER_G0016026	adam8	116.513	3.69664	0.105716	0.593106
LEUER_G0010493	arl1	193.54	1.94891	0.105815	0.593106
LEUER_G0003808	pdss2	165.647	2.8574	0.106055	0.593106
LEUER_G0006303	raver2	350.388	-1.98855	0.106083	0.593106
LEUER_G0006277	arpc5	542.569	1.85195	0.106112	0.593106
LEUER_G0014920	igsf21	253.764	-2.36367	0.106126	0.593106
LEUER_G0001989	LOC116970985	372.292	1.94486	0.10619	0.593106
LEUER_G0012519	frs3	396.26	2.53431	0.106228	0.593106
LEUER_G0007609	ppm1l	513.219	-2.02785	0.106249	0.593106
LEUER_G0007180	nkap	290.931	1.89386	0.106264	0.593106
LEUER_G0005146	cebpz	485.406	-1.85752	0.106362	0.593113
LEUER_G0015554	smad3	126.347	-2.81976	0.106411	0.593113
LEUER_G0011725	LOC116985904	35.9073	4.02144	0.106551	0.593482
LEUER_G0003465	serinc1	376.09	2.50146	0.106823	0.593716
LEUER_G0008223	LOC116980481	186.512	2.39199	0.106825	0.593716
LEUER_G0013337	coil	118.985	-3.61083	0.106864	0.593716
LEUER_G0006350	ralgps2	145.514	-2.509	0.106885	0.593716
LEUER_G0002106	gldc	122.086	-3.09917	0.107097	0.594317
LEUER_G0015416	rexo2	53.2705	4.07096	0.107152	0.594317
LEUER_G0012263	pacsin1	565.606	-1.908	0.107218	0.594317
LEUER_G0014856	mrpl20	52.3479	3.68466	0.107286	0.594317
LEUER_G0016601	LOC116967400	171.261	-2.30331	0.10771	0.596258
LEUER_G0012024	dido1	1191.54	1.4646	0.107852	0.596376
LEUER_G0012605	med13l	703.203	-1.6134	0.107912	0.596376
LEUER_G0012467	rbbp5	174.339	-2.33764	0.107979	0.596376
LEUER_G0013739	lgals9	235.969	2.65279	0.108047	0.596376
LEUER_G0001449	glipr2	259.883	2.45789	0.108098	0.596376
LEUER_G0002033	elavl2	2123	1.36477	0.108317	0.597124
LEUER_G0005046	xpo1	401.479	1.8711	0.108444	0.597124
LEUER_G0013218	jpt1	476.388	1.68333	0.108521	0.597124
LEUER_G0012652	kntc1	69.7646	-3.47845	0.108614	0.597124
LEUER_G0007936	tfdp2	110.951	-2.67509	0.108691	0.597124
LEUER_G0005845	akap6	1271.47	1.49734	0.108696	0.597124
LEUER_G0006018	jag2	121.993	-2.94312	0.108748	0.597124
LEUER_G0006381	lrrc7	39.0605	3.77016	0.108972	0.597945
LEUER_G0006607	gtf2b	380.458	-2.24153	0.109296	0.599322
LEUER_G0013887	rfc2	127.564	3.53015	0.109381	0.599383
LEUER_G0008689	afap1l2	51.6624	-4.00501	0.109483	0.599537
LEUER_G0009912	magi1	635.527	-1.60728	0.10964	0.599609
LEUER_G0001569	LOC116966958	293.684	2.25214	0.109644	0.599609
LEUER_G0010712	slc17a6	271.659	-2.37786	0.110106	0.601729
LEUER_G0001206	shh	259.509	2.07872	0.110248	0.602098
LEUER_G0000465	ncapg	117.916	3.20394	0.110334	0.602168
LEUER_G0013328	wfikkn2	375.806	3.05189	0.1106	0.602853
LEUER_G0017223	znf592	280.224	2.79411	0.110608	0.602853
LEUER_G0004681	rbms1	201.2	-2.29752	0.111135	0.60483
LEUER_G0016883	LOC116967727	49.7805	4.57914	0.111149	0.60483
LEUER_G0002137	ptar1	216.751	2.89517	0.111209	0.60483
LEUER_G0003734	heatr5b	419.893	-1.94522	0.111363	0.60483
LEUER_G0017256	ireb2	292.283	-1.90603	0.111421	0.60483
LEUER_G0000195	g3bp2	261.44	2.23712	0.111629	0.60483
LEUER_G0013272	abca5	817.194	1.7282	0.111635	0.60483
LEUER_G0012039	LOC116986320	317.271	2.6188	0.111669	0.60483
LEUER_G0013453	LOC116988362	106.175	2.93187	0.111675	0.60483
LEUER_G0011434	lyrm1	33.3068	-5.17632	0.111806	0.60483
LEUER_G0002910	dad1	139.546	2.35756	0.111837	0.60483
LEUER_G0013649	thrap3	3270.06	-1.57863	0.1119	0.60483
LEUER_G0004284	rap2a	697.242	-1.79933	0.112011	0.60483
LEUER_G0008450	frmpd4	142.138	2.72452	0.112158	0.60483
LEUER_G0002398	nsa2	1325.77	-1.42372	0.112159	0.60483
LEUER_G0011904	LOC116986180	163.158	-3.7103	0.112163	0.60483
LEUER_G0004332	LOC116974562	35.9841	4.98857	0.11242	0.605611
LEUER_G0005094	nenf	59.4322	3.28444	0.112457	0.605611
LEUER_G0014757	exosc10	304.002	-1.75228	0.112541	0.605622
LEUER_G0017830	tsc2	281.514	2.36913	0.112608	0.605622
LEUER_G0015072	lamc3	137.871	-2.88852	0.112712	0.605782
LEUER_G0014578	LOC116990132	80.4566	-3.24721	0.112978	0.606465
LEUER_G0002371	otp	463.034	-2.39613	0.113034	0.606465
LEUER_G0013507	nudc	2014.61	-1.61188	0.113063	0.606465
LEUER_G0009545	klhl36	75.0934	-2.67224	0.113156	0.606561
LEUER_G0016710	kat6a	1040.63	-1.57042	0.113367	0.607052
LEUER_G0017028	LOC116967774	223.271	2.4536	0.11344	0.607052
LEUER_G0009839	rgs9bp	102.446	-3.53229	0.113472	0.607052
LEUER_G0012553	LOC116987065	372.971	1.97412	0.113635	0.607524
LEUER_G0007245	faah2	105.703	-3.25214	0.113808	0.608047
LEUER_G0014247	borcs8	49.1311	3.58621	0.114353	0.610533
LEUER_G0015128	eng	495.658	-1.77437	0.114423	0.610533
LEUER_G0002608	crtap	198.269	-2.83076	0.115192	0.614229
LEUER_G0006502	rps8	1161.66	-1.39071	0.115338	0.614576
LEUER_G0013526	trappc3	114.472	-3.25283	0.115408	0.614576
LEUER_G0016398	hmgxb4	225.769	2.47673	0.115496	0.61464
LEUER_G0016426	tob2	565.938	-2.14388	0.115772	0.614789
LEUER_G0006087	rps6kl1	156.844	2.69639	0.115825	0.614789
LEUER_G0014353	arid3a	442.892	-1.6172	0.115857	0.614789
LEUER_G0016451	thap7	262.084	1.97079	0.115874	0.614789
LEUER_G0001246	ahr	234.383	-2.15506	0.115902	0.614789
LEUER_G0006513	dhcr24	683.371	1.59119	0.116018	0.614999
LEUER_G0013566	rpl11	60.278	-2.9882	0.116375	0.616492
LEUER_G0006092	ccnk	421.279	2.03975	0.116482	0.616551
LEUER_G0002590	cnot10	558.832	-1.80197	0.116538	0.616551
LEUER_G0006989	LOC116978589	9980.09	1.27953	0.116708	0.61705
LEUER_G0016065	chat	632.125	1.89374	0.117038	0.618392
LEUER_G0012353	ppox	36.6381	-4.51471	0.117331	0.618849
LEUER_G0010403	cntn1	1719.22	1.4558	0.117395	0.618849
LEUER_G0015244	cntrl	315.309	-1.67817	0.117458	0.618849
LEUER_G0015645	rnf111	858.589	-1.98161	0.117537	0.618849
LEUER_G0003843	thumpd2	112.462	-3.65653	0.117601	0.618849
LEUER_G0002146	c3h9orf85	34.1585	4.64676	0.117706	0.618849
LEUER_G0005350	c8h1orf198	142.58	-2.38163	0.117724	0.618849
LEUER_G0004138	fdx1	195.348	2.06579	0.117734	0.618849
LEUER_G0003516	mrpl19	78.8911	2.70518	0.118017	0.619588
LEUER_G0013632	smap2	337.116	-2.24052	0.118029	0.619588
LEUER_G0013560	tekt2	32.5886	-4.6164	0.118245	0.619588
LEUER_G0013331	abcc3	86.5317	2.99975	0.118275	0.619588
LEUER_G0017650	LOC116966222	422.942	-2.30058	0.118327	0.619588
LEUER_G0004617	rapgef4	111.623	2.63668	0.118404	0.619588
LEUER_G0007252	pcdh19	724.391	1.65055	0.118501	0.619588
LEUER_G0011424	rrn3	283.538	1.91735	0.118539	0.619588
LEUER_G0015741	snrpa1	152.764	2.19968	0.118562	0.619588
LEUER_G0005205	cript	55.1411	3.34721	0.118758	0.620215
LEUER_G0015304	sorl1	509.383	1.77428	0.118918	0.620289
LEUER_G0009976	grip2	237.504	-2.53008	0.119	0.620289
LEUER_G0010082	p4htm	36.732	-4.46127	0.119154	0.620289
LEUER_G0005408	mtrf1l	316.649	2.75125	0.119172	0.620289
LEUER_G0006548	cfap57	162.883	-2.08711	0.119182	0.620289
LEUER_G0013713	cuedc1	87.3213	-3.04161	0.119305	0.620289
LEUER_G0009602	LOC116982610	31.8428	5.07391	0.119347	0.620289
LEUER_G0003782	lmbrd1	99.9035	2.50964	0.119495	0.620289
LEUER_G0017812	ubqln4	524.025	1.68515	0.119536	0.620289
LEUER_G0003300	hmgn3	613.51	-2.24559	0.119759	0.620289
LEUER_G0013194	LOC116988000	187.834	2.23742	0.119874	0.620289
LEUER_G0016087	ecd	109.748	-3.1544	0.119902	0.620289
LEUER_G0007305	enox2	300.572	2.10552	0.119925	0.620289
LEUER_G0013255	LOC116988071	2768.96	-1.45872	0.119931	0.620289
LEUER_G0013648	map7d1	597.103	1.74742	0.119978	0.620289
LEUER_G0016478	ift27	226.826	-2.1974	0.12	0.620289
LEUER_G0014164	LOC116989324	884.869	-1.55411	0.120103	0.620289
LEUER_G0007300	LOC116979060	43.7546	3.78132	0.120199	0.620289
LEUER_G0014767	alpl	87.912	3.00046	0.120257	0.620289
LEUER_G0013748	LOC116988793	905.742	-1.55837	0.120332	0.620289
LEUER_G0000231	naa15	462.103	-1.66547	0.120376	0.620289
LEUER_G0001062	pycr3	52.9971	-3.75065	0.120856	0.622368
LEUER_G0013473	LOC116988379	103.38	-3.44901	0.120954	0.622416
LEUER_G0001608	LOC116985293	50.5858	-4.43801	0.121019	0.622416
LEUER_G0000778	LOC116980377	60.8368	-4.33323	0.121232	0.622752
LEUER_G0005264	afdn	2896.64	1.30506	0.121292	0.622752
LEUER_G0013532	maco1	633.073	1.82987	0.121441	0.622752
LEUER_G0010699	lrp4	258.14	-2.10223	0.121519	0.622752
LEUER_G0012048	stk4	1598.87	-1.44509	0.121595	0.622752
LEUER_G0012830	cldn5	125.881	-2.90616	0.121604	0.622752
LEUER_G0016782	pgam2	211.461	2.05105	0.12165	0.622752
LEUER_G0006574	dnttip2	340.815	2.49195	0.121698	0.622752
LEUER_G0012315	lemd2	71.7324	-3.12911	0.121861	0.6229
LEUER_G0000632	kif2a	833.091	1.5126	0.121979	0.6229
LEUER_G0011779	rnf216	169.742	3.32616	0.122086	0.6229
LEUER_G0011414	LOC116985511	326.261	1.74213	0.122108	0.6229
LEUER_G0006841	higd2a	148.821	2.17318	0.122151	0.6229
LEUER_G0002555	znf236	567.479	2.289	0.122187	0.6229
LEUER_G0008668	grk5	180.525	-2.32214	0.122394	0.623196
LEUER_G0001754	vstm2a	140.817	-3.29137	0.122398	0.623196
LEUER_G0003053	c4h1orf35	143.323	2.26939	0.122603	0.623324
LEUER_G0012831	LOC116987498	138.579	2.36976	0.12275	0.623324
LEUER_G0016872	hnrnpl	873.94	-1.5487	0.122756	0.623324
LEUER_G0001323	LOC116989512	307.399	-2.63521	0.122784	0.623324
LEUER_G0004677	cd302	126.71	2.67932	0.122807	0.623324
LEUER_G0006064	ahsa1	461.848	1.57637	0.122903	0.62342
LEUER_G0014819	mxra8	219.983	-2.95734	0.123031	0.623679
LEUER_G0005734	srp14	125.549	2.8655	0.123199	0.623817
LEUER_G0008314	cul4a	237.502	-2.12719	0.123272	0.623817
LEUER_G0007171	phf6	130.08	-2.15776	0.123356	0.623817
LEUER_G0009835	cep89	451.102	-2.18998	0.123365	0.623817
LEUER_G0004768	pcbp3	409.97	2.07505	0.124062	0.626635
LEUER_G0012473	LOC116986980	47.9707	3.50376	0.12414	0.626635
LEUER_G0015331	LOC116991185	353.979	-2.02658	0.124154	0.626635
LEUER_G0014118	dazap1	667.711	-2.11751	0.124277	0.626696
LEUER_G0004353	LOC116974581	53.4971	3.42573	0.124574	0.626696
LEUER_G0017362	ubxn1	322.535	2.25161	0.124639	0.626696
LEUER_G0010664	tes	98.8118	2.83977	0.124676	0.626696
LEUER_G0001518	ift57	315.268	-1.95006	0.124809	0.626696
LEUER_G0015066	ptges2	409.046	2.93667	0.124831	0.626696
LEUER_G0003960	LOC116974132	30.965	-4.56414	0.125023	0.626696
LEUER_G0005121	rab3gap2	256.894	-2.13316	0.125031	0.626696
LEUER_G0012696	tbc1d10a	149.663	-2.15715	0.125049	0.626696
LEUER_G0006995	LOC116978600	105.179	-3.80909	0.125153	0.626696
LEUER_G0001071	parp10	61.0764	3.64625	0.12527	0.626696
LEUER_G0004118	alkbh8	102.357	2.54117	0.125323	0.626696
LEUER_G0017603	cops6	292.173	1.85626	0.125369	0.626696
LEUER_G0008009	lrch3	1007.47	-1.62467	0.125396	0.626696
LEUER_G0010338	adipor2	92.7905	-3.29769	0.125557	0.626696
LEUER_G0012921	git2	478.25	-1.69584	0.125657	0.626696
LEUER_G0004365	tmem131	745.215	1.50678	0.125771	0.626696
LEUER_G0016871	ech1	61.5449	-3.76772	0.125775	0.626696
LEUER_G0011966	cbln4	127.232	3.21075	0.125811	0.626696
LEUER_G0008115	LOC116980337	554.331	-1.46025	0.125837	0.626696
LEUER_G0016963	ap2s1	144.531	2.42507	0.125852	0.626696
LEUER_G0006475	LOC116977857	117.9	-2.57715	0.125864	0.626696
LEUER_G0011132	abcc9	48.7428	3.38107	0.125989	0.626933
LEUER_G0005926	fermt2	473.676	-2.04305	0.126414	0.628434
LEUER_G0000091	smad1	733.424	-1.4905	0.126455	0.628434
LEUER_G0012658	diablo	213.769	2.28214	0.12668	0.628434
LEUER_G0001506	tbc1d5	586.919	1.79305	0.126706	0.628434
LEUER_G0015155	nrarp	331.073	-2.1424	0.126709	0.628434
LEUER_G0001794	LOC116970348	827.048	-2.08697	0.126808	0.628434
LEUER_G0005011	arid1b	1841.38	-1.44279	0.126832	0.628434
LEUER_G0012008	blcap	42.8891	3.88005	0.127772	0.632659
LEUER_G0007891	LOC116979899	38.6647	-4.39547	0.127841	0.632659
LEUER_G0009937	shq1	58.0647	3.47351	0.12798	0.632962
LEUER_G0005534	cct4	1810.51	1.65075	0.128251	0.633688
LEUER_G0005812	scfd1	336.476	1.82536	0.128331	0.633688
LEUER_G0016103	LOC116966579	80.6685	-3.09737	0.128361	0.633688
LEUER_G0006065	LOC116977208	1023.31	-1.42473	0.128515	0.634063
LEUER_G0009681	csnk2a2	191.739	2.92329	0.128612	0.634157
LEUER_G0011845	dlgap4	868.527	1.81671	0.12879	0.63465
LEUER_G0012878	cabp1	218.895	-3.02496	0.128916	0.634883
LEUER_G0000830	zbtb7c	52.9465	3.50648	0.129049	0.635158
LEUER_G0002223	scrg1	229.856	2.40973	0.129325	0.63613
LEUER_G0000177	LOC116972209	109.599	-2.35228	0.129496	0.636393
LEUER_G0005204	LOC116976484	33.3914	-4.85383	0.129535	0.636393
LEUER_G0016736	pbdc1	70.834	-2.93853	0.129646	0.63655
LEUER_G0007773	dzip1l	587.46	-1.88618	0.129784	0.636795
LEUER_G0015887	LOC116966123	390.352	-1.79608	0.129853	0.636795
LEUER_G0001452	tmem245	67.2581	2.84576	0.130263	0.638422
LEUER_G0004462	pikfyve	429.696	1.78446	0.13061	0.639538
LEUER_G0014793	camta1	1745.63	2.32444	0.130691	0.639538
LEUER_G0009694	wdr59	177.168	2.59401	0.130727	0.639538
LEUER_G0006192	aspm	811.281	-1.68826	0.130843	0.639719
LEUER_G0004159	micu2	47.5845	-2.92146	0.131083	0.640165
LEUER_G0016648	rassf2	250.378	-1.76452	0.131091	0.640165
LEUER_G0007702	pccb	243.206	-2.48331	0.131528	0.641842
LEUER_G0007992	sphkap	352.146	2.56214	0.131593	0.641842
LEUER_G0000227	cplx1	198.044	2.45057	0.131738	0.642164
LEUER_G0004392	LOC116974626	32.0613	-3.97301	0.131924	0.642686
LEUER_G0012471	lrrn2	556.417	-2.85311	0.132116	0.642765
LEUER_G0008247	kpna3	273.751	-1.94002	0.132124	0.642765
LEUER_G0008967	LOC116981634	161.252	-2.12109	0.132218	0.642765
LEUER_G0001305	tra2a	425.695	1.65457	0.132331	0.642765
LEUER_G0006977	LOC116978399	318.508	-2.37156	0.132336	0.642765
LEUER_G0009900	cadps	876.341	1.53174	0.132708	0.644184
LEUER_G0006394	cpt2	41.0695	-4.01512	0.132805	0.644271
LEUER_G0009985	LOC116983183	189.624	-1.93568	0.13295	0.644509
LEUER_G0009558	LOC116982556	761.65	1.72518	0.133028	0.644509
LEUER_G0009432	fbxo31	110.115	-2.93193	0.133128	0.644509
LEUER_G0010530	LOC116984002	1485.09	-1.39395	0.1332	0.644509
LEUER_G0005796	spred1	331.45	-2.17022	0.133251	0.644509
LEUER_G0012185	LOC116986101	231.465	-1.83082	0.133544	0.645409
LEUER_G0013710	dynll2	1561.27	1.59615	0.133596	0.645409
LEUER_G0010426	dgki	596.683	1.59575	0.133703	0.645463
LEUER_G0005220	kcng3	81.739	3.74601	0.133859	0.645463
LEUER_G0017509	sarnp	112.485	-2.36068	0.133913	0.645463
LEUER_G0011659	plk1	236.158	-3.18355	0.133925	0.645463
LEUER_G0013613	LOC116988564	602.903	-1.71519	0.134031	0.645592
LEUER_G0015560	morf4l1	301.264	1.98894	0.134283	0.646228
LEUER_G0005829	kif26a	1082.84	-1.50364	0.134449	0.646228
LEUER_G0010366	sult4a1	827.23	2.24388	0.134616	0.646228
LEUER_G0015625	pigbos1	138.876	-2.93074	0.134626	0.646228
LEUER_G0017696	gigyf1	1094.85	-1.7183	0.134645	0.646228
LEUER_G0001423	c2h5orf22	41.2991	3.93105	0.134747	0.646228
LEUER_G0008912	supv3l1	128.383	-2.18891	0.134751	0.646228
LEUER_G0002068	LOC116971075	1671.05	1.35213	0.134863	0.646228
LEUER_G0014445	LOC116989659	2101.63	-1.43733	0.13488	0.646228
LEUER_G0012609	lhx5	613.671	-1.49231	0.134995	0.646402
LEUER_G0015247	stom	1385.12	1.58536	0.135077	0.646411
LEUER_G0006132	LOC116977437	365.907	-1.85426	0.135233	0.646776
LEUER_G0012953	ube2l3	2808.77	1.26626	0.135395	0.646942
LEUER_G0015250	niban2	63.13	-3.23118	0.135427	0.646942
LEUER_G0012977	gtf2h3	69.2917	3.14479	0.135972	0.648878
LEUER_G0013778	gdpd1	1133.57	-1.7104	0.136058	0.648878
LEUER_G0009597	nae1	597.333	1.73201	0.136132	0.648878
LEUER_G0001621	jarid2	616.134	1.43644	0.136152	0.648878
LEUER_G0010227	stab1	359.771	-2.30208	0.136258	0.649003
LEUER_G0009114	atp5mc1	657.732	2.182	0.136493	0.64974
LEUER_G0009700	prmt7	181.934	-2.48797	0.136757	0.650615
LEUER_G0014886	fam131c	48.5245	2.95461	0.137073	0.651559
LEUER_G0007346	mid2	118.213	-3.08815	0.137183	0.651559
LEUER_G0005732	bub1b	135.293	-2.91948	0.137404	0.651559
LEUER_G0011202	tcp11l2	89.2565	2.8474	0.13751	0.651559
LEUER_G0014256	gatad2a	726.91	1.76944	0.137539	0.651559
LEUER_G0002105	uhrf2	490.088	-1.83523	0.137669	0.651559
LEUER_G0011379	atp5f1c	923.867	-1.52423	0.137818	0.651559
LEUER_G0013790	brip1	29.8582	-4.91615	0.13783	0.651559
LEUER_G0017882	LOC116970345	3310.19	1.34236	0.137873	0.651559
LEUER_G0000596	sgcz	48.623	4.29556	0.138058	0.651559
LEUER_G0014779	tardbp	2541.31	1.33475	0.138176	0.651559
LEUER_G0000613	fat1	1103.91	-1.36091	0.138187	0.651559
LEUER_G0014356	tmem259	326.921	2.1396	0.138229	0.651559
LEUER_G0006112	unc79	163.299	-1.88605	0.138283	0.651559
LEUER_G0002210	c9orf72	149.686	2.12877	0.138302	0.651559
LEUER_G0012686	tctn1	176.006	2.35463	0.138312	0.651559
LEUER_G0007385	vbp1	416.57	1.6517	0.13842	0.651559
LEUER_G0002702	cspp1	133.534	2.44701	0.138493	0.651559
LEUER_G0002806	impa1	308.727	2.18243	0.138556	0.651559
LEUER_G0001240	svil	651.214	-1.49318	0.13856	0.651559
LEUER_G0000253	jakmip1	214.535	2.12287	0.138665	0.651675
LEUER_G0017875	mcm7	113.862	2.84926	0.138847	0.652154
LEUER_G0009928	frmd4b	458.396	-2.24625	0.139094	0.652938
LEUER_G0004348	c2cd3	406.584	-1.85336	0.139331	0.65321
LEUER_G0011241	trabd	272.187	2.02981	0.139408	0.65321
LEUER_G0002971	ebag9	63.8704	3.16993	0.139468	0.65321
LEUER_G0004697	ttc21b	395.098	1.72878	0.139474	0.65321
LEUER_G0002808	LOC116972183	257.729	1.72291	0.139707	0.653925
LEUER_G0009757	thap11	195.316	3.10984	0.139917	0.654532
LEUER_G0017098	otud7a	304.288	1.93242	0.140218	0.654616
LEUER_G0002019	smarca2	1246.93	-1.39117	0.140288	0.654616
LEUER_G0003634	nbas	501.408	-1.75008	0.140322	0.654616
LEUER_G0011375	celf2	578.481	-1.61566	0.140389	0.654616
LEUER_G0000033	spry1	96.1806	2.76593	0.140391	0.654616
LEUER_G0004663	gpd2	46.0867	-3.33706	0.140419	0.654616
LEUER_G0007562	clstn2	307.786	-1.87219	0.140628	0.655215
LEUER_G0002714	gnal	311.123	1.56784	0.14078	0.655547
LEUER_G0001094	itgb1	1089.32	1.40434	0.141283	0.657511
LEUER_G0000735	LOC116979786	252.314	-1.89448	0.141412	0.657735
LEUER_G0009760	ranbp10	1072.46	-1.39893	0.141559	0.657852
LEUER_G0017258	crabp1	893.682	-2.28039	0.141661	0.657852
LEUER_G0004431	maip1	95.3514	-3.44533	0.141834	0.657852
LEUER_G0009962	zmynd10	92.936	-3.34024	0.141875	0.657852
LEUER_G0017310	LOC116968392	81.7715	-2.62382	0.141888	0.657852
LEUER_G0006797	LOC116978325	681.959	1.47457	0.141971	0.657852
LEUER_G0004953	catip	30.0897	-4.31799	0.142004	0.657852
LEUER_G0002009	slc12a2	99.2614	-2.82018	0.142219	0.658471
LEUER_G0005233	hhat	70.6835	3.57218	0.142612	0.659784
LEUER_G0001387	ice1	1174.43	-1.62592	0.142665	0.659784
LEUER_G0002732	LOC116972097	44.5874	3.49998	0.143089	0.660709
LEUER_G0007984	LOC116980002	649.153	2.29908	0.143153	0.660709
LEUER_G0005869	insm2	57.9174	-4.16431	0.143183	0.660709
LEUER_G0006106	ddx24	191.352	2.52114	0.14319	0.660709
LEUER_G0000828	smad7	76.1584	-3.53331	0.14333	0.660979
LEUER_G0011479	zc3h7a	206.949	2.23784	0.143639	0.662026
LEUER_G0017818	slc25a11	502.341	-1.86829	0.14387	0.66258
LEUER_G0015831	cacna1a	1035.72	-1.34109	0.143922	0.66258
LEUER_G0016136	frmpd2	161.983	-2.88031	0.14429	0.663837
LEUER_G0000010	rnf150	283.95	1.60006	0.144548	0.663837
LEUER_G0009166	msl1	190.325	1.83837	0.144579	0.663837
LEUER_G0002653	LOC116971995	29.1144	3.44744	0.144718	0.663837
LEUER_G0001742	wac	378.686	1.94131	0.144793	0.663837
LEUER_G0008426	bach1	149.972	2.53179	0.144912	0.663837
LEUER_G0010049	lsm3	111.859	2.55556	0.144976	0.663837
LEUER_G0015069	exosc2	55.538	3.34483	0.14499	0.663837
LEUER_G0011366	mkln1	132.362	2.96912	0.145005	0.663837
LEUER_G0008822	gsto1	368.834	-2.4327	0.145013	0.663837
LEUER_G0010484	ano4	94.9314	2.50001	0.145821	0.667163
LEUER_G0009518	pmfbp1	226.968	2.14087	0.145959	0.667391
LEUER_G0016702	LOC116967520	1600.54	-1.59636	0.146036	0.667391
LEUER_G0016053	nolc1	446.917	1.53264	0.146269	0.668084
LEUER_G0014777	ajap1	301.209	-1.95748	0.146361	0.668128
LEUER_G0008788	morn4	248.85	2.49776	0.146444	0.668131
LEUER_G0014209	palm	743.818	-1.45074	0.146623	0.668534
LEUER_G0005874	fam177a1	98.384	-2.62361	0.146788	0.668534
LEUER_G0013589	sf3a3	557.216	-1.6759	0.146886	0.668534
LEUER_G0015621	secisbp2l	724.499	1.59097	0.146891	0.668534
LEUER_G0016153	pald1	147.54	-2.35029	0.147054	0.668534
LEUER_G0011774	tnrc18	977.109	1.53788	0.147105	0.668534
LEUER_G0012083	pigu	114.821	2.61103	0.147133	0.668534
LEUER_G0002078	cenpe	459.178	-1.64957	0.147191	0.668534
LEUER_G0011068	lta4h	136.267	2.34299	0.147611	0.670067
LEUER_G0006098	flrt2	230.267	-2.72035	0.147785	0.670241
LEUER_G0015375	dscaml1	518.253	-1.59964	0.147815	0.670241
LEUER_G0006205	LOC116977512	132.062	2.18713	0.14811	0.671204
LEUER_G0012253	hipk1	969.178	-1.40963	0.148328	0.67171
LEUER_G0002869	xkr4	268.34	1.72992	0.148387	0.67171
LEUER_G0001874	wdr36	109.882	-2.53718	0.148789	0.673155
LEUER_G0002765	LOC116972131	837.875	1.4484	0.149112	0.674078
LEUER_G0001587	cdkal1	103.125	-2.8755	0.149171	0.674078
LEUER_G0014728	cdk11a	763.072	-1.54951	0.149242	0.674078
LEUER_G0010729	tpcn2	69.4007	-3.96241	0.149374	0.674302
LEUER_G0013015	usp43	115.28	3.34813	0.149692	0.675108
LEUER_G0014393	fbn3	316.383	-1.97562	0.149825	0.675108
LEUER_G0004859	zranb3	159.121	-2.48831	0.149862	0.675108
LEUER_G0005937	rtraf	483.739	1.57652	0.149885	0.675108
LEUER_G0007566	mrps22	109.826	2.8287	0.150055	0.675496
LEUER_G0001446	clptm1l	581.036	-2.20136	0.150402	0.676684
LEUER_G0011365	podxl	964.893	-1.56733	0.150524	0.676858
LEUER_G0015062	wdr34	37.1676	4.02911	0.150653	0.677063
LEUER_G0004393	LOC116974627	456.893	-1.85071	0.151042	0.678237
LEUER_G0000212	LOC116972577	566.491	1.54588	0.151131	0.678237
LEUER_G0007083	kcnip1	274.451	-2.34865	0.15123	0.678237
LEUER_G0001660	topbp1	72.8079	3.05617	0.151334	0.678237
LEUER_G0002303	rictor	823.202	1.31486	0.151416	0.678237
LEUER_G0013132	ccdc137	101.086	-2.21293	0.151503	0.678237
LEUER_G0015865	LOC116969744	4403.38	1.38331	0.151586	0.678237
LEUER_G0013327	tob1	188.27	-2.34052	0.151771	0.678237
LEUER_G0006187	nek7	64.2385	-3.53533	0.151857	0.678237
LEUER_G0007219	slitrk2	316.736	2.15624	0.15191	0.678237
LEUER_G0003175	slc4a1ap	389.012	1.74454	0.151912	0.678237
LEUER_G0007353	frmpd3	453.001	1.57468	0.151943	0.678237
LEUER_G0004775	LOC116975383	492.342	1.45986	0.152061	0.678237
LEUER_G0008417	scaf4	1209.98	-1.39018	0.152214	0.678237
LEUER_G0006342	imp3	42.8784	3.46301	0.152283	0.678237
LEUER_G0007351	rbm41	975.596	1.32621	0.152325	0.678237
LEUER_G0009882	dennd6a	126.205	-2.60563	0.152448	0.678237
LEUER_G0013671	meaf6	353.061	-1.71856	0.152482	0.678237
LEUER_G0004504	plcl1	96.8898	2.72406	0.152565	0.678237
LEUER_G0004153	eef1akmt1	34.5969	3.2811	0.152672	0.678237
LEUER_G0012109	lsm14b	777.373	1.42091	0.152712	0.678237
LEUER_G0014294	LOC116989480	92.0828	2.43464	0.152814	0.678237
LEUER_G0011221	rad51ap1	381.445	-2.22918	0.152883	0.678237
LEUER_G0015206	nek6	44.9673	-3.49451	0.152919	0.678237
LEUER_G0007155	psmd10	32.3264	3.87137	0.153046	0.678433
LEUER_G0007343	shroom4	162.855	-3.04396	0.153178	0.678645
LEUER_G0000594	dlc1	215.767	2.55545	0.153337	0.678979
LEUER_G0009505	slc10a3	84.4497	3.07186	0.15368	0.679802
LEUER_G0005559	LOC116976443	66.7481	2.97826	0.153764	0.679802
LEUER_G0002262	cenpc	309.7	-1.64564	0.153774	0.679802
LEUER_G0014573	LOC116990133	131.432	2.71514	0.154066	0.680722
LEUER_G0012573	LOC116987100	695.762	-1.67316	0.154316	0.681279
LEUER_G0001355	hoxa6	338.618	1.94146	0.154391	0.681279
LEUER_G0013914	bckdk	251.733	-1.75651	0.154465	0.681279
LEUER_G0001839	slf1	128.334	2.34065	0.15455	0.681279
LEUER_G0013341	prpsap1	422.215	2.44516	0.154611	0.681279
LEUER_G0011668	usp31	809.021	-1.69626	0.155276	0.683377
LEUER_G0013539	clic4	2841.21	-1.58541	0.155331	0.683377
LEUER_G0014838	LOC116990513	41.7191	4.02217	0.15534	0.683377
LEUER_G0004746	klf7	862.11	1.40189	0.155426	0.683387
LEUER_G0007979	pigz	30.1756	4.20788	0.155626	0.683896
LEUER_G0012055	nrsn2	743.564	1.94461	0.155876	0.684625
LEUER_G0008623	adam12	44.5565	-3.77881	0.156021	0.684743
LEUER_G0007596	gfm1	178.361	2.43043	0.156072	0.684743
LEUER_G0001110	pfkp	113.758	-2.39299	0.156213	0.684991
LEUER_G0013220	nup85	287.144	2.17585	0.156814	0.687255
LEUER_G0015352	LOC116991341	1377.37	1.31165	0.157066	0.687854
LEUER_G0003833	amd1	292.055	1.68709	0.15712	0.687854
LEUER_G0014649	acot7	30.2253	3.57127	0.157484	0.689078
LEUER_G0008846	sirt1	262.187	1.79406	0.157828	0.690209
LEUER_G0011956	sall4	82.9231	-2.86966	0.158048	0.690803
LEUER_G0015644	sltm	924.515	-1.40461	0.158451	0.692172
LEUER_G0004335	rps3	896.841	-1.37362	0.158532	0.692172
LEUER_G0008551	pank1	61.2416	3.19896	0.158624	0.692201
LEUER_G0001697	cacnb2	237.32	-2.51236	0.15873	0.69229
LEUER_G0014472	LOC116989896	115.006	-3.14155	0.15893	0.692523
LEUER_G0013558	LOC116988485	592.679	-1.88228	0.158954	0.692523
LEUER_G0004791	cdk15	92.5597	2.88443	0.159074	0.692676
LEUER_G0000382	paqr3	74.9636	2.45082	0.159365	0.693572
LEUER_G0011206	uhrf1bp1l	375.404	1.70419	0.159651	0.694443
LEUER_G0015652	arnt2	359.276	-1.81759	0.159884	0.695085
LEUER_G0003031	LOC116972469	972.986	-1.62507	0.160018	0.695297
LEUER_G0003068	kif9	37.4257	-3.97175	0.160125	0.69539
LEUER_G0014673	dffa	138.661	-1.99002	0.160364	0.695409
LEUER_G0010812	api5	525.205	-1.57289	0.160436	0.695409
LEUER_G0008620	LOC116981051	260.972	-1.75425	0.160509	0.695409
LEUER_G0008354	slc35a5	191.109	2.4173	0.160517	0.695409
LEUER_G0012805	ppil2	133.71	2.58254	0.160558	0.695409
LEUER_G0012334	ppil1	34.9921	4.11603	0.160761	0.695916
LEUER_G0010315	ndufb2	71.2829	3.25586	0.160954	0.69635
LEUER_G0010895	fth1	1023.22	1.28269	0.161219	0.69635
LEUER_G0005021	utrn	518.035	-1.48618	0.161261	0.69635
LEUER_G0004832	faim	133.239	2.10867	0.16132	0.69635
LEUER_G0003534	LOC116973362	701.452	1.86794	0.161359	0.69635
LEUER_G0004704	lancl1	269.702	2.33427	0.16148	0.69635
LEUER_G0001578	kiaa0319	430.135	1.86034	0.161546	0.69635
LEUER_G0010301	syn3	1334	1.31917	0.161547	0.69635
LEUER_G0010822	kbtbd4	253.773	-1.92519	0.161905	0.697517
LEUER_G0012700	sec14l2	178.257	1.80956	0.161989	0.697517
LEUER_G0008431	ltn1	460.549	-2.08523	0.162346	0.69868
LEUER_G0009123	hoxb6	439.289	-1.51806	0.162449	0.698752
LEUER_G0008458	ofd1	134.811	-2.08732	0.16271	0.699496
LEUER_G0011242	selenoo	88.753	2.31745	0.162809	0.699496
LEUER_G0014106	LOC116989256	949.42	-2.0107	0.16288	0.699496
LEUER_G0009238	LOC116981965	281.482	2.02027	0.162969	0.699508
LEUER_G0013378	LOC116988290	140.374	-1.99951	0.16311	0.699709
LEUER_G0008396	gap43	10637.3	1.119	0.163188	0.699709
LEUER_G0010174	wnt7a	178.454	2.76264	0.163364	0.700093
LEUER_G0007588	fam124b	46.6873	-3.34505	0.163651	0.700956
LEUER_G0000438	wdr1	283.408	1.53847	0.16379	0.701178
LEUER_G0015091	usp20	247.033	-2.01543	0.16402	0.701795
LEUER_G0006393	czib	46.2295	-3.39763	0.164146	0.701965
LEUER_G0014444	matk	49.4038	-4.02086	0.164311	0.702302
LEUER_G0007801	LOC116979803	118.119	3.04175	0.164491	0.702663
LEUER_G0015657	mthfs	81.4184	3.12578	0.164569	0.702663
LEUER_G0006529	atpaf1	51.4519	-3.62857	0.164854	0.703197
LEUER_G0007375	LOC116979141	505.229	-1.56773	0.164895	0.703197
LEUER_G0000168	tmem128	98.8377	2.75695	0.164954	0.703197
LEUER_G0006434	eps15	351.892	2.10356	0.165254	0.704106
LEUER_G0016667	egr3	610.562	1.86825	0.165539	0.704622
LEUER_G0002638	samd12	237.705	2.38594	0.165548	0.704622
LEUER_G0001046	scrib	178.538	-1.86959	0.165738	0.704862
LEUER_G0006388	negr1	430.163	-1.73885	0.165778	0.704862
LEUER_G0013684	LOC116988707	60.4181	3.11051	0.166147	0.706058
LEUER_G0006805	LOC116978333	3796.17	-1.52854	0.166243	0.706099
LEUER_G0001341	chn2	133.281	2.09574	0.166597	0.707231
LEUER_G0009891	pdhb	3333.18	1.3332	0.166841	0.707847
LEUER_G0012009	src	237.235	1.9675	0.167121	0.707847
LEUER_G0004790	kiaa2012	264.24	-1.80883	0.167122	0.707847
LEUER_G0011548	rac1	672.565	-1.59889	0.167235	0.707847
LEUER_G0014258	ndufa13	56.9185	3.50895	0.167251	0.707847
LEUER_G0003329	ankrd6	328.74	-1.96182	0.167265	0.707847
LEUER_G0006582	ccdc18	34.593	-4.04813	0.167388	0.707887
LEUER_G0011464	rmi2	71.9358	2.88007	0.167449	0.707887
LEUER_G0003497	epb41l2	367.644	-1.48258	0.167817	0.709074
LEUER_G0000521	n4bp2	239.762	2.03591	0.168023	0.709571
LEUER_G0011020	LOC116984418	115.086	-2.70517	0.168145	0.709571
LEUER_G0004001	sesn3	108.59	2.4409	0.168196	0.709571
LEUER_G0007207	radx	58.7961	2.89924	0.168634	0.710881
LEUER_G0016147	LOC116966510	88.5629	2.34004	0.168762	0.710881
LEUER_G0009934	gpr27	218.014	2.21554	0.16877	0.710881
LEUER_G0006373	serbp1	1464.38	-1.31238	0.169112	0.711911
LEUER_G0013153	slc39a11	233.912	-1.9011	0.16919	0.711911
LEUER_G0008026	sox2	755.861	1.78097	0.169666	0.713548
LEUER_G0004835	cfap221	79.6897	-3.41046	0.169895	0.71378
LEUER_G0002698	c4h8orf34	57.8526	-3.39035	0.169897	0.71378
LEUER_G0013116	pycr1	96.1011	2.55661	0.170031	0.71397
LEUER_G0013730	mnt	93.3775	-2.84508	0.170266	0.714443
LEUER_G0013198	myo15b	29.5368	3.63731	0.170319	0.714443
LEUER_G0006041	ttc7b	36.1595	3.98456	0.170769	0.715959
LEUER_G0017806	plec	3917.03	-1.11201	0.170864	0.715989
LEUER_G0009192	gosr2	121.599	-2.97761	0.170979	0.716102
LEUER_G0014214	klf2	91.5264	-2.75348	0.171534	0.717125
LEUER_G0011955	atp9a	277.77	1.95911	0.171543	0.717125
LEUER_G0005977	snapc1	130.433	2.54137	0.171567	0.717125
LEUER_G0007682	ppp1r2	391.756	-1.68638	0.171758	0.717125
LEUER_G0005312	eif4a3	340.784	1.81228	0.171793	0.717125
LEUER_G0014812	LOC116990480	1319.42	-1.38493	0.171861	0.717125
LEUER_G0004008	gpr83	38.0298	3.56637	0.171984	0.717125
LEUER_G0003232	brox	329.042	2.43496	0.172015	0.717125
LEUER_G0010653	LOC116984163	454.171	1.42328	0.172034	0.717125
LEUER_G0009513	terf2	75.9923	2.80328	0.172106	0.717125
LEUER_G0002912	vapa	729.004	1.88687	0.172263	0.71738
LEUER_G0013365	LOC116988276	72.1397	3.2753	0.172402	0.71738
LEUER_G0003076	dhx30	113.906	2.83246	0.172478	0.71738
LEUER_G0006864	sh3pxd2b	678.677	1.38157	0.172539	0.71738
LEUER_G0005122	mark1	936.498	1.48619	0.172609	0.71738
LEUER_G0000329	unc5c	127.978	2.15358	0.172853	0.718025
LEUER_G0007170	hprt1	132.346	-2.5128	0.173088	0.718635
LEUER_G0012014	LOC116986292	426.375	-1.58187	0.173328	0.718655
LEUER_G0010589	rab3ip	84.7901	-3.14131	0.173478	0.718655
LEUER_G0004539	LOC116975076	174.412	2.40088	0.173525	0.718655
LEUER_G0005953	togaram1	226.066	2.08613	0.173576	0.718655
LEUER_G0007246	aifm1	43.1588	2.84827	0.173592	0.718655
LEUER_G0011139	golt1b	127.117	2.99285	0.1737	0.718655
LEUER_G0010207	slc6a11	30.3677	3.67377	0.173755	0.718655
LEUER_G0004592	hoxd4	594.923	-1.43438	0.173801	0.718655
LEUER_G0015077	prrc2b	4267.49	-1.19718	0.173905	0.718709
LEUER_G0002647	trps1	205.381	2.15895	0.173991	0.718709
LEUER_G0004884	spata24	42.0553	-3.77227	0.174409	0.71938
LEUER_G0014879	ddost	1696.89	1.35631	0.174497	0.71938
LEUER_G0010153	creld1	120.878	2.35769	0.174504	0.71938
LEUER_G0006931	sqstm1	735.009	-1.86771	0.174875	0.71938
LEUER_G0001966	LOC116970962	212.513	2.48858	0.174925	0.71938
LEUER_G0001869	fer	342.756	-1.63791	0.175122	0.71938
LEUER_G0014942	coq4	158.879	2.30905	0.175151	0.71938
LEUER_G0013692	LOC116988716	447.758	-1.72963	0.175174	0.71938
LEUER_G0015490	kcnj5	449.311	-1.77285	0.175178	0.71938
LEUER_G0015486	nfrkb	92.2598	2.60175	0.175232	0.71938
LEUER_G0007090	faxdc2	134.915	2.593	0.175442	0.71938
LEUER_G0013955	mtmr4	442.977	1.52657	0.175541	0.71938
LEUER_G0001841	fam81b	38.5293	-2.9007	0.175555	0.71938
LEUER_G0009593	cmtm4	91.9854	2.0539	0.175739	0.71938
LEUER_G0000904	ctnna2	595.686	1.90297	0.175767	0.71938
LEUER_G0005696	vps39	209.619	2.34656	0.175925	0.71938
LEUER_G0007062	clint1	519.938	2.10958	0.176143	0.71938
LEUER_G0003327	ube2j1	312.911	1.71123	0.176289	0.71938
LEUER_G0002656	znf704	156.324	-1.87897	0.176338	0.71938
LEUER_G0001333	azi2	94.832	-2.58153	0.176348	0.71938
LEUER_G0006091	ccdc85c	592.18	-1.9807	0.176396	0.71938
LEUER_G0005614	lrr1	67.3459	2.80676	0.176412	0.71938
LEUER_G0006905	prelid1	357.169	2.1613	0.176428	0.71938
LEUER_G0009161	rara	905.164	-1.5174	0.17652	0.71938
LEUER_G0014419	znf414	36.2428	-4.28341	0.17657	0.71938
LEUER_G0012555	wdr77	46.3757	4.06055	0.176698	0.71938
LEUER_G0002417	map1b	20152.4	1.06077	0.176702	0.71938
LEUER_G0010014	ift122	91.2183	-2.1289	0.17671	0.71938
LEUER_G0011080	nedd1	32.8766	-3.4195	0.176734	0.71938
LEUER_G0008621	insyn2a	32.1396	3.68105	0.176837	0.71938
LEUER_G0016911	yif1b	856.186	-1.79415	0.176952	0.71938
LEUER_G0011583	hmox2	246.646	1.58101	0.176997	0.71938
LEUER_G0009578	vat1l	906.265	1.40258	0.177077	0.71938
[truncated: 8,271 more rows]

## Sheet: Chicken
GeneId	baseMean	log2FoldChange	lfcSE	stat	pvalue	padj
SIM1	114.153	-5.82081	0.521324	-11.1654	6.01959e-29	7.91035e-25
ZIC1	966.07	-1.9037	0.187736	-10.1403	3.66123e-24	2.40561e-20
CCK	627.646	-2.61976	0.266764	-9.82051	9.18758e-23	4.02447e-19
SCN2A	3491.89	1.52529	0.166707	9.1495	5.71991e-20	1.87913e-16
HBBR	415.799	-11.4174	1.27959	-8.9227	4.55042e-19	1.19594e-15
ABCC9	68.8661	-5.2373	0.60435	-8.66599	4.47589e-18	9.80295e-15
GAP43	3025.01	1.38459	0.163597	8.46343	2.59617e-17	4.87375e-14
HES5	1668.53	-1.28861	0.15577	-8.27253	1.31147e-16	2.15426e-13
ENSGALG00000045548	20910	0.994031	0.122569	8.10999	5.06228e-16	7.39149e-13
DRAXIN	2088.66	-1.39043	0.173861	-7.99734	1.27134e-15	1.67067e-12
ADGRD2	912.766	-1.74559	0.220127	-7.92994	2.19243e-15	2.61916e-12
HBZ	130.974	-10.4727	1.3235	-7.91286	2.51544e-15	2.75461e-12
FGFR2	1334.56	-1.32917	0.168231	-7.90088	2.76951e-15	2.79955e-12
SALL1	4149.91	-0.978249	0.124894	-7.83264	4.77722e-15	4.4841e-12
CALM2	26421.3	1.51755	0.20048	7.56955	3.74516e-14	3.28101e-11
DLL1	1742	-1.1168	0.148139	-7.53886	4.74095e-14	3.89381e-11
NR2F2	2034.11	1.0482	0.140515	7.45974	8.6694e-14	6.70145e-11
TOP2A	2817.08	-0.975642	0.132028	-7.38967	1.47192e-13	1.07458e-10
CNTN5	596.635	1.37954	0.18727	7.36659	1.75043e-13	1.21066e-10
LRP1B	2066.38	1.36707	0.185848	7.35584	1.89725e-13	1.24659e-10
ARHGAP19	576.395	-1.32834	0.182397	-7.28266	3.27289e-13	2.04805e-10
ENSGALG00000043381	198.632	-3.11536	0.432208	-7.20803	5.67687e-13	3.25278e-10
SPARC	1218.97	-1.29548	0.179738	-7.20764	5.69316e-13	3.25278e-10
DOCK1	981.753	-1.44151	0.201302	-7.16093	8.01308e-13	4.3875e-10
PLAGL1	308.201	-1.57386	0.220472	-7.13858	9.43017e-13	4.95687e-10
SOX6	516.83	-1.50377	0.211254	-7.11834	1.09235e-12	5.52097e-10
INSIG1	2298.26	0.916693	0.130241	7.03844	1.94411e-12	9.46205e-10
IMPA1	718.972	1.48534	0.211369	7.02724	2.10663e-12	9.88686e-10
HBAD	100.297	-10.0879	1.44164	-6.99753	2.60508e-12	1.18046e-09
LRIG1	1619.77	-1.05449	0.152619	-6.90928	4.87133e-12	2.13381e-09
RET	936.603	1.38821	0.20471	6.78132	1.19083e-11	5.04799e-09
ENSGALG00000028415	1353.79	-0.956682	0.1412	-6.77537	1.24089e-11	5.0958e-09
NOTCH1	4890.77	-0.929758	0.138207	-6.72727	1.72872e-11	6.88396e-09
STX7	827.555	1.09878	0.165136	6.65378	2.8566e-11	1.10407e-08
ENSGALG00000041054	945.118	1.0191	0.153429	6.64216	3.09112e-11	1.16058e-08
NRP1	5197.9	1.13963	0.175657	6.48779	8.7105e-11	3.17957e-08
SULT4A1	1510.48	1.00003	0.154339	6.47947	9.20461e-11	3.26913e-08
ENSGALG00000036466	1299.46	-0.997149	0.15411	-6.47036	9.77705e-11	3.30145e-08
LFNG	1335.75	-1.35468	0.209378	-6.47003	9.79808e-11	3.30145e-08
LAPTM4B	1285.05	1.03597	0.161	6.43456	1.23828e-10	3.96882e-08
HMGCLL1	204.797	1.68937	0.26247	6.43644	1.22308e-10	3.96882e-08
ZBTB18	1160.51	-1.04212	0.162311	-6.42049	1.35836e-10	4.25004e-08
ENSGALG00000043355	483.358	-1.52081	0.237362	-6.40712	1.48297e-10	4.33061e-08
TMEM170B	673.498	1.24443	0.194196	6.40812	1.47321e-10	4.33061e-08
PLCE1	1794.91	-1.00668	0.157069	-6.40913	1.46354e-10	4.33061e-08
PDE9A	268.112	-1.58782	0.248338	-6.3938	1.61812e-10	4.62255e-08
TCEB1	1654.42	1.33021	0.20888	6.36831	1.91129e-10	5.34387e-08
CMPK1	3607.97	1.03365	0.162852	6.34719	2.19287e-10	6.00345e-08
ENSGALG00000038755	523.26	-1.22214	0.193076	-6.32987	2.45365e-10	6.58028e-08
RDH10	562.296	1.7574	0.280106	6.27406	3.51755e-10	8.59462e-08
FGF13	2695.85	0.83745	0.133439	6.27591	3.47594e-10	8.59462e-08
CHRDL1	215.616	-1.60641	0.256182	-6.27058	3.59717e-10	8.59462e-08
LRP4	1592.05	-1.3315	0.211937	-6.28253	3.33117e-10	8.59462e-08
HBA1	42.1222	-7.37895	1.17594	-6.27494	3.49764e-10	8.59462e-08
MAP1LC3A	723.632	1.27292	0.202927	6.27281	3.54594e-10	8.59462e-08
MYL12B	2213.56	0.978989	0.156407	6.25923	3.86881e-10	9.07858e-08
HEYL	204.63	-1.54401	0.248145	-6.22222	4.90169e-10	1.13005e-07
BOC	657.264	-1.31374	0.211607	-6.20842	5.35209e-10	1.1722e-07
EMILIN2	150.269	-1.76459	0.284167	-6.20971	5.30841e-10	1.1722e-07
PTCH2	405.293	-1.44567	0.232724	-6.21196	5.2329e-10	1.1722e-07
PPP3R1	4289.23	0.902518	0.145989	6.18208	6.32629e-10	1.31958e-07
MAST4	4313.93	0.850026	0.137471	6.18331	6.27697e-10	1.31958e-07
RFTN2	563.697	-1.15987	0.18754	-6.18464	6.22428e-10	1.31958e-07
ENSGALG00000006724	572.101	-1.24614	0.20199	-6.16933	6.85794e-10	1.40813e-07
YWHAH	3759.84	0.947697	0.154596	6.13014	8.78037e-10	1.77512e-07
SERTAD4	377.078	-1.30065	0.212367	-6.12454	9.09458e-10	1.78376e-07
MDGA1	227.227	1.95211	0.318713	6.12498	9.06951e-10	1.78376e-07
GLI3	940.517	-1.15338	0.188541	-6.11739	9.51175e-10	1.78563e-07
LAMA1	2600.47	-0.881792	0.144108	-6.11897	9.41796e-10	1.78563e-07
PLPP3	1163.62	-1.31259	0.21441	-6.1219	9.24683e-10	1.78563e-07
TMEM65	3074.66	1.13932	0.186756	6.10061	1.05664e-09	1.95568e-07
NCAM2	1353.17	1.18007	0.193553	6.09686	1.08169e-09	1.97424e-07
GNAZ	1285.66	0.957951	0.157739	6.07302	1.25525e-09	2.25961e-07
KCNIP4	718.741	1.1313	0.187084	6.04701	1.47562e-09	2.62042e-07
RFX4	1220.72	-1.3183	0.218919	-6.02186	1.72426e-09	3.02113e-07
ASCL1	332.666	-1.50151	0.250439	-5.99552	2.0283e-09	3.50654e-07
PANK1	2283.04	0.888646	0.14827	5.99343	2.05466e-09	3.50654e-07
ZC3H12C	1001.57	-0.983119	0.164511	-5.97602	2.28653e-09	3.85221e-07
CNTN1	2299.86	1.18104	0.199903	5.90805	3.46184e-09	5.75848e-07
GABRG3	344.729	1.35679	0.229958	5.90019	3.63076e-09	5.96398e-07
KIF4B	891.33	-1.218	0.208518	-5.84124	5.18122e-09	8.40572e-07
DUSP14	767.332	-0.889286	0.152337	-5.83761	5.29556e-09	8.48645e-07
ENSGALG00000055108	1129.73	-1.04927	0.179972	-5.83018	5.53663e-09	8.76588e-07
ENSGALG00000012941	788.342	1.32415	0.227974	5.80835	6.30922e-09	9.87017e-07
PCP4	166.091	1.66964	0.288202	5.79329	6.90198e-09	1.05464e-06
ENSGALG00000051789	220.763	1.53245	0.264513	5.79347	6.89485e-09	1.05464e-06
SRPX	895.739	-1.05359	0.181984	-5.78946	7.06139e-09	1.06659e-06
GPR37L1	89.9046	-2.27336	0.397955	-5.71262	1.11252e-08	1.66132e-06
SCN9A	2002.4	0.93418	0.163743	5.70515	1.16238e-08	1.71627e-06
SNAP25	4775.7	0.992623	0.17453	5.68741	1.28983e-08	1.8833e-06
CTNNA1	498.617	-1.18961	0.209669	-5.67374	1.39715e-08	2.01758e-06
ENSGALG00000053700	229.935	1.51857	0.268243	5.66118	1.50333e-08	2.14606e-06
HOXB1	426.472	-1.33618	0.236097	-5.65943	1.51879e-08	2.14606e-06
SERPINH1	412.832	-1.60998	0.284726	-5.65448	1.56318e-08	2.18529e-06
SLIT1	4128.6	-0.826719	0.146556	-5.64097	1.69091e-08	2.33898e-06
ALCAM	3238.19	0.889939	0.158021	5.63177	1.78365e-08	2.44155e-06
DSTN	10909.6	0.76472	0.136212	5.6142	1.97477e-08	2.67531e-06
OAT	2347.7	0.911984	0.163196	5.58826	2.29358e-08	3.04444e-06
COL5A1	849.25	-1.44323	0.258254	-5.58841	2.29159e-08	3.04444e-06
NID1	149.601	-2.26204	0.405075	-5.58424	2.34726e-08	3.08454e-06
SLC41A2	636.857	1.32628	0.237925	5.57438	2.48417e-08	3.20044e-06
DYNLRB1	4153.28	0.659246	0.118239	5.57556	2.46742e-08	3.20044e-06
ENSGALG00000007710	116.442	-2.15354	0.386942	-5.56553	2.6136e-08	3.3345e-06
TSPAN13	4270.99	1.05296	0.189635	5.55254	2.81542e-08	3.54902e-06
SCG3	15186.2	0.697198	0.125592	5.55129	2.83576e-08	3.54902e-06
MSX1	111.902	-1.98315	0.357458	-5.54793	2.89078e-08	3.58375e-06
SMOC2	176.923	-1.88982	0.341118	-5.54008	3.02329e-08	3.713e-06
SEMA3A	1862.12	0.924669	0.167207	5.5301	3.20057e-08	3.89433e-06
CHRNA1	30.0636	-3.45895	0.628882	-5.50015	3.79465e-08	4.57482e-06
LTBP1	687.134	-1.50525	0.273805	-5.49751	3.85197e-08	4.6017e-06
ATP6V0C	7160.31	0.638798	0.116486	5.4839	4.1604e-08	4.92539e-06
DENND2B	385.513	-1.05263	0.192712	-5.46217	4.70343e-08	5.51855e-06
SCYL2	2575.78	0.862848	0.158306	5.45051	5.02263e-08	5.84092e-06
SYT4	6382.27	0.994122	0.182639	5.44309	5.23636e-08	6.03605e-06
ENSGALG00000048674	985.803	0.959328	0.176402	5.43831	5.37872e-08	6.14624e-06
SMC2	1174.39	-1.16233	0.214119	-5.42846	5.68436e-08	6.38446e-06
ELAVL4	31274.7	0.640545	0.117985	5.42906	5.66514e-08	6.38446e-06
AGTPBP1	1470.27	0.968293	0.178459	5.42586	5.7676e-08	6.42305e-06
CASP3	3000.92	0.685132	0.126568	5.41317	6.19183e-08	6.83755e-06
HEPACAM	30.1719	-5.27947	0.975903	-5.40983	6.30833e-08	6.90814e-06
YAP1	432.588	-1.65999	0.306933	-5.4083	6.36257e-08	6.90996e-06
UBE2E1	1184.8	1.18488	0.219317	5.40262	6.5676e-08	7.04914e-06
ENSGALG00000015428	275.448	-1.41966	0.262813	-5.40179	6.59801e-08	7.04914e-06
UNC13B	610.766	1.08009	0.200021	5.39987	6.66899e-08	7.06751e-06
SEMA3D	751.503	1.20098	0.222592	5.39543	6.83607e-08	7.18663e-06
TENM1	2264.33	0.697619	0.129454	5.38895	7.08712e-08	7.39142e-06
AKR1D1	53.5345	-3.89745	0.724415	-5.38014	7.44284e-08	7.70129e-06
SFRP1	925.965	-0.928429	0.17285	-5.37129	7.81749e-08	8.02576e-06
CALB1	78.0605	2.48842	0.463709	5.36634	8.03488e-08	8.18499e-06
SERPINI1	1721.62	0.795027	0.14825	5.36274	8.19674e-08	8.28564e-06
GNAI1	3972.3	1.01593	0.189584	5.35872	8.38139e-08	8.40762e-06
SLBP	297.665	-1.1652	0.217686	-5.35266	8.66694e-08	8.6282e-06
YWHAG	12863.7	0.612048	0.11459	5.34119	9.23394e-08	9.12355e-06
GDF3	251.152	-1.22115	0.228822	-5.33668	9.46624e-08	9.28327e-06
LIN7C	3286.02	0.778941	0.14607	5.33266	9.67865e-08	9.42127e-06
SNAP91	4687.47	0.710461	0.133703	5.31373	1.07401e-07	1.03777e-05
GLRA2	1635.36	1.21323	0.228692	5.30509	1.12617e-07	1.07953e-05
GLRX5	837.692	1.07827	0.203299	5.30388	1.13367e-07	1.07953e-05
CXCL14	2847.05	-0.94486	0.178197	-5.30232	1.14339e-07	1.08096e-05
ENSGALG00000047620	142.27	-2.26257	0.42801	-5.28625	1.24849e-07	1.16358e-05
PAFAH1B1	13882.7	0.62313	0.117852	5.28739	1.24075e-07	1.16358e-05
PPP2R5C	2127.3	0.930864	0.176192	5.28325	1.26912e-07	1.17448e-05
NPTN	7634.38	0.653276	0.123714	5.28053	1.28814e-07	1.18374e-05
LIMA1	599.419	-1.13635	0.215957	-5.26194	1.42547e-07	1.30084e-05
ENSGALG00000049819	570.329	1.03676	0.197273	5.25546	1.47658e-07	1.32903e-05
RTN4	21730.4	0.553432	0.105282	5.25666	1.46696e-07	1.32903e-05
SLC12A7	987.633	0.723993	0.138111	5.2421	1.58759e-07	1.40963e-05
CA9	156.289	-1.47392	0.281132	-5.24281	1.58149e-07	1.40963e-05
DYNLL2	6083.59	0.696812	0.133099	5.23529	1.64725e-07	1.45279e-05
PKD2	224.79	-1.28428	0.24563	-5.22852	1.70876e-07	1.49699e-05
EPS15	5997.06	0.660348	0.126702	5.21182	1.86998e-07	1.62737e-05
GABARAPL2	2782.14	0.874493	0.168037	5.20416	1.94873e-07	1.68476e-05
CASS4	1010.23	-1.09261	0.210409	-5.19278	2.07176e-07	1.77941e-05
SALL3	3884.24	-0.714906	0.137744	-5.19011	2.10172e-07	1.79342e-05
RNF2	3125.32	0.676253	0.130375	5.18697	2.13742e-07	1.81212e-05
HSPA12A	3495.85	0.861474	0.166386	5.17756	2.24802e-07	1.89367e-05
SNAP29	1512.18	1.20859	0.233563	5.17459	2.2841e-07	1.91181e-05
TXNDC17	888.407	1.0887	0.210519	5.17152	2.32196e-07	1.93119e-05
EGF	1463.21	-1.19607	0.231915	-5.15734	2.50478e-07	2.0572e-05
ARF4	9047.21	0.719362	0.139469	5.15786	2.49788e-07	2.0572e-05
ENSGALG00000053214	86.5597	2.39493	0.467057	5.12771	2.93295e-07	2.3939e-05
GPR85	2046.71	0.719296	0.140649	5.11412	3.15208e-07	2.54119e-05
ARL6IP5	2629.76	0.898597	0.175689	5.11469	3.14261e-07	2.54119e-05
ENSGALG00000052494	1152.88	0.832955	0.163414	5.09722	3.44679e-07	2.76185e-05
ENSGALG00000048024	26.4684	-4.31862	0.84748	-5.09583	3.47209e-07	2.76525e-05
DCX	15761.7	0.727571	0.14287	5.09254	3.53297e-07	2.79199e-05
MDK	1037.56	-0.938518	0.184322	-5.09173	3.54814e-07	2.79199e-05
ATP1B1	1703.02	0.917091	0.18036	5.08479	3.68039e-07	2.87881e-05
ENSGALG00000033626	361.973	-1.04528	0.205704	-5.0815	3.74462e-07	2.91172e-05
ENSGALG00000002671	1032.03	1.21144	0.238587	5.07756	3.82313e-07	2.95528e-05
UTRN	1413.34	-1.07928	0.213012	-5.06673	4.04702e-07	3.11005e-05
BRCA1	1234.08	-1.06401	0.210062	-5.06521	4.07949e-07	3.11678e-05
CACNA2D3	8027.15	0.872094	0.172267	5.06246	4.13881e-07	3.12575e-05
ITFG1	6911.19	0.904315	0.178627	5.06259	4.13592e-07	3.12575e-05
CTDSPL	908.932	0.810107	0.160138	5.05882	4.2186e-07	3.12925e-05
KIF5C	14688.9	0.596671	0.1179	5.06085	4.17397e-07	3.12925e-05
ABLIM1	955.425	1.04372	0.206354	5.05791	4.23869e-07	3.12925e-05
PAX3	318.644	-1.13566	0.224495	-5.05871	4.22092e-07	3.12925e-05
STARD5	567.223	1.22518	0.24236	5.05521	4.29926e-07	3.15623e-05
ENSGALG00000025996	1384.94	-1.00008	0.197897	-5.05351	4.33775e-07	3.1668e-05
UBE2V2	1996.41	1.02471	0.202817	5.05239	4.36326e-07	3.16782e-05
CALM1	18456.5	0.641197	0.127148	5.0429	4.58522e-07	3.31068e-05
ENSGALG00000033089	473.683	1.13121	0.224425	5.04049	4.64343e-07	3.33439e-05
B4GALT6	1206.97	1.18779	0.235821	5.03685	4.73244e-07	3.37984e-05
ISCA1	1418.61	0.959522	0.190821	5.02838	4.9463e-07	3.51348e-05
PLCB4	4938.77	0.609559	0.121285	5.02582	5.01286e-07	3.54161e-05
CBLN2	1977.86	0.804525	0.160295	5.01902	5.19365e-07	3.63374e-05
ENSGALG00000053422	75.2591	-2.09277	0.417067	-5.01782	5.22621e-07	3.63374e-05
TCIM	41.7759	-2.77701	0.553373	-5.01833	5.21231e-07	3.63374e-05
CXCR4	772.468	-0.853242	0.170236	-5.0121	5.38395e-07	3.72371e-05
TMEM254	1636.21	1.05796	0.211251	5.00809	5.49721e-07	3.78214e-05
RHOB	1744.42	0.775009	0.154921	5.00261	5.65585e-07	3.87102e-05
ENSGALG00000051973	308.283	1.15234	0.230438	5.00065	5.71375e-07	3.89038e-05
EDNRA	155.827	-2.33801	0.467832	-4.99755	5.80641e-07	3.93309e-05
LRIG3	152.194	-2.25762	0.451902	-4.99583	5.85841e-07	3.94797e-05
NIN	2138.44	-1.00771	0.20183	-4.99285	5.94945e-07	3.98886e-05
LPL	389.066	-1.41481	0.283514	-4.99024	6.03036e-07	4.00227e-05
TMC3	305.727	1.27096	0.254653	4.99094	6.00859e-07	4.00227e-05
RGL1	369.071	-1.22166	0.245338	-4.9795	6.37487e-07	4.20966e-05
ENSGALG00000054420	6506.32	0.849317	0.170659	4.97668	6.46858e-07	4.22903e-05
TP53BP2	917.192	-0.915103	0.183848	-4.97749	6.44128e-07	4.22903e-05
CD24	2109.1	0.899094	0.181314	4.95878	7.09369e-07	4.61476e-05
SHROOM2	3717.95	0.758733	0.153044	4.95763	7.13587e-07	4.61933e-05
RAP1B	3270.02	0.943229	0.190348	4.95528	7.22275e-07	4.65265e-05
SEPTIN9	969.322	-0.792588	0.16029	-4.94471	7.62559e-07	4.88819e-05
HOXC8	2655.69	0.831104	0.168189	4.9415	7.7523e-07	4.94529e-05
HINT3	1136.83	0.935782	0.189439	4.93976	7.8218e-07	4.96552e-05
ARHGAP31	36.8619	-4.34046	0.880263	-4.93087	8.18628e-07	5.17192e-05
VTA1	2076.98	0.844739	0.17155	4.92415	8.47263e-07	5.30373e-05
VSNL1	1052.39	0.973182	0.197637	4.92408	8.47563e-07	5.30373e-05
DIO2	46.9364	-3.0297	0.616238	-4.91644	8.81327e-07	5.48887e-05
CHRNA5	514.514	1.24908	0.254319	4.91147	9.03965e-07	5.60331e-05
ZIC4	45.1216	-2.93304	0.597687	-4.90732	9.23277e-07	5.69614e-05
GCC2	3379.05	0.696366	0.142029	4.90299	9.43885e-07	5.79607e-05
ENSGALG00000051598	2376.95	0.905099	0.184861	4.89609	9.77607e-07	5.97523e-05
ATP7B	405.091	-1.35088	0.275965	-4.89512	9.82461e-07	5.97709e-05
MFAP3L	96.0092	1.83387	0.37504	4.8898	1.0094e-06	6.11269e-05
CDK6	3885.14	-0.596676	0.122085	-4.88736	1.02195e-06	6.16029e-05
YAF2	1285.72	1.2012	0.245844	4.88604	1.02885e-06	6.17359e-05
CDKL5	1258.68	0.764384	0.156579	4.88176	1.05141e-06	6.28024e-05
SGO1	192.891	-1.23108	0.252396	-4.87757	1.07402e-06	6.36082e-05
EVL	1786.69	0.763252	0.156485	4.87747	1.07458e-06	6.36082e-05
ENSGALG00000037071	344.793	1.55392	0.318835	4.87375	1.095e-06	6.45266e-05
MCM2	457.496	-1.08668	0.223024	-4.87249	1.10198e-06	6.46477e-05
UCHL1	8843.1	0.678372	0.13942	4.86568	1.14063e-06	6.66179e-05
ENSGALG00000054941	198.844	-1.41402	0.291164	-4.85643	1.1952e-06	6.94959e-05
GATAD1	466.339	1.4283	0.294681	4.84694	1.25382e-06	7.20302e-05
CDH10	935.709	1.00442	0.207236	4.84671	1.25523e-06	7.20302e-05
SOBP	4482.2	0.682241	0.140759	4.84687	1.25423e-06	7.20302e-05
KIF21A	7242.78	0.567212	0.117237	4.83815	1.31054e-06	7.48773e-05
CDC42	15812.8	0.618161	0.127866	4.83446	1.33504e-06	7.59473e-05
GSTA3	40.7802	2.79026	0.577833	4.82883	1.37336e-06	7.77901e-05
HBE	172.047	-6.66757	1.38203	-4.82448	1.40367e-06	7.91659e-05
MAP1B	81436.6	0.547816	0.113693	4.81836	1.44744e-06	8.07563e-05
DDAH1	366.925	1.01799	0.21129	4.81796	1.45031e-06	8.07563e-05
SSTR5	209.439	1.67687	0.34802	4.81832	1.44775e-06	8.07563e-05
ENSGALG00000039468	1247.17	1.22797	0.255853	4.79951	1.59055e-06	8.81914e-05
C8orf34	398.99	1.09546	0.22854	4.79331	1.64049e-06	9.05783e-05
WDR47	3018.96	0.644467	0.134529	4.79053	1.66338e-06	9.14578e-05
HMGA2	109.708	-1.62762	0.339834	-4.78946	1.67232e-06	9.15667e-05
PLD5	737.39	0.881009	0.184123	4.78489	1.7108e-06	9.25167e-05
TBC1D9	2755.87	0.645014	0.134783	4.78559	1.70488e-06	9.25167e-05
ISL1	947.421	1.25971	0.263229	4.78559	1.70488e-06	9.25167e-05
SHTN1	1649.98	0.777382	0.162575	4.78169	1.73831e-06	9.36192e-05
COX20	420.502	1.16103	0.243113	4.77568	1.79103e-06	9.56747e-05
ENSGALG00000007007	833.699	0.72578	0.151971	4.77578	1.79014e-06	9.56747e-05
ARL8BL	814.401	0.804866	0.168797	4.76826	1.85824e-06	9.88631e-05
SNCG	60.8199	2.63226	0.553197	4.75827	1.95255e-06	0.000103462
TPX2	1594.56	-0.758167	0.159439	-4.75521	1.98244e-06	0.000104623
ENSGALG00000011747	127.112	-1.59777	0.336197	-4.75249	2.00925e-06	0.000105614
MACIR	960.701	1.09545	0.230675	4.74892	2.04509e-06	0.00010707
FBXL2	3114.76	0.685887	0.144544	4.74519	2.08309e-06	0.000108626
ENSGALG00000043556	2548	-1.07081	0.225939	-4.73939	2.14362e-06	0.000111341
SYT9	374.026	0.900229	0.190027	4.73738	2.16499e-06	0.000112008
CDH13	1618.17	0.886958	0.187311	4.73522	2.18823e-06	0.000112767
DPP10	1892.38	0.905479	0.191717	4.723	2.32393e-06	0.000119292
AP1AR	1697.01	0.627863	0.132991	4.7211	2.34574e-06	0.000119943
TMTC4	3392.93	0.799578	0.169666	4.71266	2.44503e-06	0.000124379
OSBPL6	3576.54	0.609348	0.129315	4.71213	2.45142e-06	0.000124379
ENSGALG00000001136	2153.81	-0.701586	0.148963	-4.70978	2.47978e-06	0.000125334
TLL1	398.369	-1.08442	0.2304	-4.70666	2.51813e-06	0.000126785
FRMD3	390.195	0.992844	0.211126	4.70261	2.56857e-06	0.000128592
FBXO3	1079.8	0.971589	0.206624	4.70221	2.57361e-06	0.000128592
ENSGALG00000027183	120.585	-1.61808	0.344183	-4.70123	2.58603e-06	0.000128723
TACC3	731.674	-0.993865	0.211542	-4.69819	2.62477e-06	0.000130159
DNAJC6	4311.62	0.558119	0.11889	4.69443	2.67349e-06	0.000132077
LAMC1	763.542	-0.993944	0.211868	-4.69134	2.71424e-06	0.000133587
ENSGALG00000006723	2877.77	0.781216	0.166759	4.6847	2.80376e-06	0.000137478
HCCS	1107.02	1.1674	0.249387	4.6811	2.85339e-06	0.000139392
ENSGALG00000031594	180.899	-1.16906	0.250262	-4.67133	2.99252e-06	0.000145647
CTNNAL1	284.351	-1.07968	0.231353	-4.66682	3.05895e-06	0.000148331
CHM	2427.87	0.654412	0.140255	4.66587	3.07309e-06	0.000148469
SLC38A2	4239.86	0.644533	0.138246	4.66223	3.12796e-06	0.000150566
WNT7A	174.955	-1.37837	0.295843	-4.6591	3.17589e-06	0.000152315
SLC16A7	426.362	0.962215	0.206873	4.65124	3.29949e-06	0.000157097
ENSGALG00000051838	270.278	1.46404	0.314748	4.65147	3.29584e-06	0.000157097
ENSGALG00000005024	858.387	-1.11444	0.24009	-4.64177	3.4544e-06	0.000163289
DIABLO	719.238	0.817026	0.176009	4.64195	3.45141e-06	0.000163289
NSG1	9022.84	0.734521	0.158469	4.63512	3.56735e-06	0.000168023
MAP7D2	1995.33	0.77753	0.167785	4.63408	3.58527e-06	0.000168265
NRIP3	126.401	1.48122	0.319725	4.63281	3.60738e-06	0.000168699
CASKIN2	123.942	-1.56963	0.338903	-4.63151	3.63014e-06	0.000169162
BTG2	536.22	-0.912713	0.197281	-4.62645	3.71983e-06	0.000172729
NOTCH2	1582.58	-0.758029	0.1641	-4.6193	3.85045e-06	0.000178165
KRAS	360.563	1.09704	0.237704	4.61516	3.92799e-06	0.000181115
RREB1	155.113	-2.03673	0.441498	-4.61323	3.96459e-06	0.000182163
CHODL	1791.48	0.835481	0.181197	4.6109	4.00928e-06	0.00018259
BLOC1S6	433.189	1.10379	0.239344	4.61174	3.99316e-06	0.00018259
PFKFB2	925.684	-0.642857	0.139431	-4.61058	4.01557e-06	0.00018259
SAMD12	96.0825	1.55798	0.338365	4.60443	4.13599e-06	0.000187418
KLF7	2000.44	0.593502	0.128965	4.60203	4.1839e-06	0.000188937
IGF2BP1	209.515	-1.22415	0.268242	-4.56359	5.02858e-06	0.000226303
KATNBL1	865.467	0.823942	0.180912	4.55437	5.25426e-06	0.00023454
RND2	254.144	-1.10323	0.242228	-4.55453	5.25018e-06	0.00023454
SKI	1074.89	-0.757085	0.166249	-4.55394	5.26514e-06	0.00023454
UFM1	866.734	0.965898	0.212413	4.54726	5.43494e-06	0.000241217
TOLLIP	2055.16	0.794674	0.174784	4.54661	5.45175e-06	0.000241217
BUB1	641.778	-0.997381	0.219519	-4.54348	5.53324e-06	0.000243185
EBF2	1214.86	-0.697246	0.153448	-4.54386	5.52339e-06	0.000243185
GLI2	647.797	-0.859519	0.18945	-4.53691	5.70844e-06	0.000250049
KIAA0930	515.778	0.812284	0.179183	4.53326	5.80808e-06	0.000253568
TCF3	1237.38	-0.837317	0.184816	-4.53054	5.88342e-06	0.000256007
NELL2	14812.6	0.576203	0.12753	4.51816	6.238e-06	0.00027054
WNT5A	103.522	-2.48492	0.550663	-4.5126	6.40385e-06	0.000275911
CLSTN1	15650.4	0.543858	0.120505	4.51317	6.38668e-06	0.000275911
ENSGALG00000007522	297.277	-0.994965	0.220703	-4.50817	6.53895e-06	0.000280812
GPC3	180.362	1.38793	0.307977	4.50661	6.58717e-06	0.000281045
ENSGALG00000007646	73.0531	-1.90508	0.422676	-4.50719	6.56915e-06	0.000281045
SGCZ	327.275	1.0656	0.236566	4.50445	6.65458e-06	0.000283003
EPDR1	624.634	1.05875	0.235188	4.50172	6.74045e-06	0.00028573
MCM6	3281.11	-0.567673	0.126145	-4.50015	6.79064e-06	0.000286932
TP53I3	134.558	-1.50434	0.334752	-4.4939	6.99291e-06	0.000294531
SMS	2969.17	0.732794	0.163206	4.49	7.12242e-06	0.000299028
KIAA1841	762.127	0.665799	0.148412	4.48616	7.25199e-06	0.000303498
PAX7	278.573	-1.15731	0.258105	-4.48386	7.33063e-06	0.000305815
CHRM3	240.439	1.48564	0.331657	4.47944	7.48391e-06	0.000311222
MAPK3	4736.47	0.697109	0.155737	4.47619	7.59867e-06	0.000314997
NRXN1	16373.5	0.553332	0.123805	4.46939	7.84429e-06	0.000324157
KPNA2	1244.65	-0.780761	0.174722	-4.46859	7.87355e-06	0.000324346
ENSGALG00000037040	809.491	0.726321	0.162598	4.46697	7.93339e-06	0.000325789
ATP6V1G1	2660.58	0.689529	0.15441	4.46558	7.98517e-06	0.000326894
RGS7	1497.33	0.89153	0.199898	4.45992	8.19891e-06	0.000334602
TSC22D1	2880.17	0.843963	0.189404	4.4559	8.35424e-06	0.000338836
GADD45G	1779.74	-0.962613	0.216026	-4.45601	8.3501e-06	0.000338836
SRSF6	6941.09	0.865397	0.194244	4.45521	8.38104e-06	0.000338878
ENSGALG00000042797	396.018	-0.888071	0.199466	-4.45226	8.49731e-06	0.000340436
LYSMD2	529.926	0.978705	0.21979	4.45291	8.47154e-06	0.000340436
C11H19orf12	991.289	0.954587	0.214363	4.45314	8.46252e-06	0.000340436
SH3YL1	245.898	1.02423	0.230176	4.44977	8.5961e-06	0.000343195
ENSGALG00000051534	1120.99	0.902857	0.202925	4.44922	8.6184e-06	0.000343195
CLSTN2	1794.45	0.791029	0.177885	4.44685	8.71394e-06	0.000345951
SERINC1	16240.1	0.566229	0.127411	4.44411	8.82548e-06	0.000348396
NLN	1513.34	0.639413	0.143881	4.44404	8.82855e-06	0.000348396
PREX2	1024.63	0.670379	0.151255	4.43212	9.33107e-06	0.000367125
FLNB	1517.08	-0.979711	0.221427	-4.42454	9.66475e-06	0.000379118
ENSGALG00000012836	214.276	-1.36246	0.308472	-4.41679	1.00178e-05	0.000391796
ENSGALG00000000818	47.8872	-9.02147	2.04671	-4.40779	1.04432e-05	0.000406018
XBP1	886.981	0.697843	0.158298	4.40842	1.04128e-05	0.000406018
ASPM	2074.68	-0.731393	0.166116	-4.4029	1.06815e-05	0.000414056
NETO2	3109.3	0.816037	0.185469	4.39985	1.08327e-05	0.000417456
RGS3	113.674	-1.84973	0.420408	-4.39986	1.08323e-05	0.000417456
MAPRE1	9922.84	0.479718	0.109235	4.39164	1.12501e-05	0.000432273
SPRYD7	878.542	0.936209	0.213358	4.38797	1.14416e-05	0.000438349
MZT1	811.16	0.986495	0.225174	4.38104	1.18113e-05	0.000449895
RGS17	472.108	0.965163	0.220305	4.38104	1.18114e-05	0.000449895
HOXB3	4348.35	-0.773499	0.176895	-4.37264	1.22755e-05	0.000466221
EIF4A2	12392.6	0.618216	0.141453	4.37046	1.23983e-05	0.000469526
FAM149A	226.569	1.48005	0.339153	4.36396	1.2773e-05	0.000482327
SLITRK1	2890.63	0.823929	0.189179	4.35528	1.32894e-05	0.000499348
CAT	1872.53	0.841374	0.193192	4.35511	1.32997e-05	0.000499348
ENSGALG00000054223	1345.36	-0.611828	0.140902	-4.34222	1.41049e-05	0.000527962
ATP8A1	5897.39	0.590491	0.136006	4.34164	1.41422e-05	0.000527962
RIF1	1325.69	-0.684211	0.157668	-4.33958	1.42755e-05	0.000531429
HTR7L	39.3085	2.71804	0.626623	4.33759	1.44053e-05	0.000534745
ENSGALG00000005107	1781.94	-0.666435	0.153746	-4.33466	1.45986e-05	0.000538878
KIF2C	358.347	-1.07925	0.248946	-4.33526	1.45589e-05	0.000538878
CADPS2	683.498	1.04151	0.24038	4.33277	1.47243e-05	0.000541093
ENSGALG00000015669	284.259	1.09777	0.253415	4.33191	1.47822e-05	0.000541093
CHMP4B	1614.36	0.950139	0.219323	4.33215	1.47661e-05	0.000541093
ENSGALG00000006292	1618.85	0.691565	0.159696	4.33051	1.48763e-05	0.000543027
SEMA3E	275.566	1.20042	0.277314	4.32873	1.49974e-05	0.000543878
DAAM2	157.741	-1.10916	0.256256	-4.32834	1.50238e-05	0.000543878
BRINP3	260.273	1.03051	0.238042	4.32913	1.49701e-05	0.000543878
ENSGALG00000048483	249.469	1.19658	0.276562	4.32661	1.51421e-05	0.000546657
ENSGALG00000049105	130.285	1.52082	0.351632	4.32503	1.52512e-05	0.000549083
ITGA4	283.161	-1.50542	0.348227	-4.3231	1.53852e-05	0.000552395
GRIA2	6062.36	0.661799	0.153173	4.3206	1.55607e-05	0.000557174
PTP4A1	14171	0.745393	0.172963	4.30956	1.63583e-05	0.000584142
CHP1	2083.69	0.613624	0.142413	4.30877	1.64167e-05	0.000584641
LRRC8B	1210.11	0.928906	0.215742	4.30564	1.66506e-05	0.000591366
VAPB	5341.85	0.542416	0.126057	4.30296	1.68532e-05	0.000596949
ENSGALG00000049622	643.728	0.969589	0.225579	4.29823	1.72165e-05	0.000607317
SMAD3	493.41	-0.871066	0.202698	-4.29736	1.72846e-05	0.000607317
GCSH	1454.28	0.783606	0.182342	4.29746	1.72769e-05	0.000607317
KIAA0319	1664.75	0.815901	0.189997	4.29428	1.75261e-05	0.000614162
GNAQ	4319.94	0.655095	0.152683	4.29054	1.78237e-05	0.000622929
TLE4	665.017	0.732743	0.170828	4.28936	1.79187e-05	0.000624545
ALDH1A2	3540.42	1.77138	0.413025	4.28879	1.7965e-05	0.000624545
SRGAP3	1824.04	-0.691794	0.161509	-4.28331	1.84131e-05	0.000638432
FBXL21	482.322	0.977438	0.228738	4.27317	1.92711e-05	0.00066595
DPM1	1187.85	0.729903	0.170828	4.27275	1.9308e-05	0.00066595
CD99	172.774	-1.72378	0.403824	-4.26865	1.9666e-05	0.000673983
DOCK11	1812.41	0.709379	0.166219	4.26774	1.97461e-05	0.000673983
WFDC1	331.217	-1.00196	0.234754	-4.26813	1.97123e-05	0.000673983
RNF114	1171.94	0.749031	0.175491	4.2682	1.97057e-05	0.000673983
ANGPT1	116.746	-1.52454	0.357353	-4.26619	1.98841e-05	0.000676936
NET1	282.246	-0.968041	0.227249	-4.25983	2.04585e-05	0.0006929
SYT16	567.448	0.779933	0.183073	4.26024	2.04212e-05	0.0006929
CBLN1	1031.39	-0.649303	0.152499	-4.25775	2.06498e-05	0.000697582
FOXM1	200.81	-1.39322	0.327632	-4.2524	2.11492e-05	0.000710797
SMC4	781.137	-0.922196	0.216864	-4.25241	2.11484e-05	0.000710797
HMG20A	1840.73	0.62129	0.14622	4.249	2.14728e-05	0.000719832
GLRB	564.723	0.87791	0.206802	4.24517	2.18425e-05	0.000730363
AMPH	1543.09	0.543236	0.128018	4.24343	2.2013e-05	0.000734196
PDGFRA	175.045	-4.80837	1.1334	-4.24242	2.21127e-05	0.000735654
VPS50	2059	0.520677	0.122802	4.23999	2.23532e-05	0.00074045
ZBTB38	1541.02	0.695568	0.164056	4.23982	2.23696e-05	0.00074045
TMEM55A	1833.94	0.776024	0.183192	4.23614	2.27399e-05	0.000750817
ENSGALG00000053318	273.659	-1.31148	0.309697	-4.23473	2.28826e-05	0.000753636
RGS9BP	433.316	0.769647	0.181906	4.23102	2.32637e-05	0.00076427
ENSGALG00000053867	739.657	-0.932753	0.220602	-4.22821	2.35561e-05	0.000768651
YWHAQ	18837.9	0.565852	0.133833	4.22805	2.35725e-05	0.000768651
VSTM4	149.72	-1.36258	0.322201	-4.22897	2.34765e-05	0.000768651
ENSGALG00000052987	105.114	1.56389	0.370261	4.22376	2.4026e-05	0.000781499
SLC1A1	436.769	1.08241	0.256403	4.22154	2.42643e-05	0.000787302
CNR1	921.559	0.825523	0.195699	4.21834	2.46105e-05	0.000796569
REEP1	12909.5	0.652726	0.154794	4.21673	2.47866e-05	0.000800296
SACS	20858.8	0.495822	0.11789	4.2058	2.60163e-05	0.000837942
KIF15	712.579	-0.866337	0.206031	-4.2049	2.61202e-05	0.000839231
KCNMA1	1899.13	0.700536	0.166649	4.20366	2.62631e-05	0.000841765
ENSGALG00000048690	182.47	1.29684	0.308921	4.19798	2.69306e-05	0.00086106
COMMD2	1616.58	0.703225	0.168048	4.18466	2.85595e-05	0.000910923
TRAPPC2	1922.97	0.764948	0.182834	4.18383	2.86642e-05	0.000912048
TMX3	3299.54	0.857957	0.205371	4.1776	2.94602e-05	0.000933319
MINOS1	1612.62	0.599279	0.143454	4.17749	2.94747e-05	0.000933319
BARHL1	58.0092	-2.15724	0.516647	-4.17547	2.97376e-05	0.000939378
ATP6V1H	1223.5	0.912917	0.218812	4.17214	3.0175e-05	0.000950911
SVIL	2122.64	-0.812522	0.1948	-4.17107	3.03175e-05	0.000953117
SLC5A7	1582.68	0.896547	0.215088	4.16829	3.06896e-05	0.000960219
TFAP2B	695.725	-0.746685	0.179118	-4.16868	3.06369e-05	0.000960219
SOX14	42.5637	-2.1911	0.525805	-4.16714	3.08451e-05	0.000962791
FBRSL1	3108.25	-0.618227	0.148505	-4.163	3.14088e-05	0.000978063
VDAC1	1510.65	0.654548	0.157366	4.15939	3.19098e-05	0.000991315
PDP1	1666.5	0.649915	0.156352	4.15675	3.22808e-05	0.000999011
UQCRB	1089.31	0.907917	0.218431	4.15655	3.23095e-05	0.000999011
SLC1A3	1270.24	-0.718491	0.173012	-4.15283	3.28382e-05	0.00101297
CA10	1499.7	0.789957	0.190335	4.15034	3.31981e-05	0.00102168
MCF2L2	4944.08	0.492186	0.118714	4.14598	3.38365e-05	0.00103889
EIF4E	2100.12	0.783076	0.189085	4.14139	3.45211e-05	0.00105744
GATA3	141.031	-1.45001	0.350306	-4.13925	3.48437e-05	0.00106237
ENSGALG00000000816	1710.07	0.547196	0.132196	4.13926	3.48426e-05	0.00106237
ZNF706	3248.09	0.62793	0.151735	4.13834	3.49831e-05	0.00106415
HYAL2	31.6267	-2.3915	0.577996	-4.13757	3.50997e-05	0.00106523
ELAVL2	2193.4	0.75285	0.182159	4.13292	3.5819e-05	0.00108251
TMEFF2	4078.78	0.733712	0.177533	4.13282	3.58338e-05	0.00108251
CDC7	109.333	-1.20084	0.291224	-4.12342	3.73281e-05	0.00112507
ENSGALG00000041422	2445.5	0.754583	0.183095	4.12126	3.76805e-05	0.00113309
SPON1	2906.47	-0.788719	0.191511	-4.1184	3.81505e-05	0.001142
ENSGALG00000051496	335.384	0.971095	0.23579	4.11847	3.81391e-05	0.001142
LECT1	351.838	-2.67365	0.649406	-4.11707	3.83718e-05	0.00114601
MANEA	430.125	0.894355	0.217481	4.11234	3.91673e-05	0.00116447
GBX2	266.517	-1.44993	0.352554	-4.11266	3.91134e-05	0.00116447
ENSGALG00000002326	35.0586	-3.17268	0.772274	-4.10824	3.98693e-05	0.00118166
ENSGALG00000034735	3275.31	0.736746	0.179353	4.1078	3.99452e-05	0.00118166
COL1A1	182.324	-9.46312	2.30392	-4.10739	4.00152e-05	0.00118166
ENSGALG00000047987	201.694	1.19989	0.292253	4.10567	4.03147e-05	0.00118603
PLPPR1	5910.3	0.547026	0.133242	4.1055	4.03435e-05	0.00118603
PLK1	445.773	-0.913913	0.222851	-4.101	4.11365e-05	0.00120664
ENSGALG00000051251	45.108	-2.13567	0.520958	-4.09951	4.1402e-05	0.00121172
CHRNB3	125.541	1.23826	0.302126	4.09849	4.15852e-05	0.00121438
ANKRD46	1980.95	0.649105	0.158402	4.09784	4.17019e-05	0.00121509
GDAP1	354.969	0.80777	0.197288	4.09436	4.23329e-05	0.00123074
ENSGALG00000055061	83.3774	1.93844	0.47443	4.08583	4.39194e-05	0.00127405
CYP1B1	75.0903	-1.78078	0.435995	-4.0844	4.41918e-05	0.00127913
SKP1	10670.3	0.492719	0.120767	4.0799	4.50554e-05	0.00130126
TCF12	8281.06	-0.756831	0.185662	-4.0764	4.57386e-05	0.00131809
VAT1L	640.003	0.755935	0.185692	4.07092	4.6828e-05	0.00134653
TMEM8B	228.044	-1.09784	0.270117	-4.06431	4.81744e-05	0.00138223
TP53INP1	2492.5	0.586026	0.144206	4.0638	4.82801e-05	0.00138224
CCNB1	1605.66	-0.518682	0.127663	-4.06289	4.84695e-05	0.00138465
TMTC3	1644.05	0.635147	0.156372	4.06178	4.87009e-05	0.00138523
MLPH	19.2515	-3.07387	0.756766	-4.06185	4.86851e-05	0.00138523
ENSGALG00000014897	680.263	0.73681	0.181663	4.05591	4.99385e-05	0.00141127
STAU1	7395.26	0.704669	0.173712	4.05653	4.98064e-05	0.00141127
MTA2	310.291	-0.838908	0.206836	-4.05592	4.99382e-05	0.00141127
FNDC3B	723.571	-0.713262	0.175892	-4.05512	5.0109e-05	0.00141305
MB21D2	1192.91	0.688053	0.169703	4.05446	5.02509e-05	0.00141402
GLT1D1	581.782	0.714132	0.176186	4.05328	5.05044e-05	0.00141812
TTLL1	1163.5	0.685801	0.16922	4.05272	5.06248e-05	0.00141847
LHX2	48.6753	-2.56785	0.633819	-4.05139	5.09142e-05	0.00142354
GTF2H5	1989.05	0.8048	0.198709	4.05015	5.11848e-05	0.0014237
SCRT2	650.96	-1.00528	0.248224	-4.04988	5.12449e-05	0.0014237
ENSGALG00000045816	170.058	-1.43892	0.355283	-4.05006	5.12052e-05	0.0014237
GLRX3	1774.34	0.665915	0.164581	4.04611	5.20749e-05	0.0014437
CLTC	9663.22	0.444863	0.110004	4.04406	5.25331e-05	0.00145029
RACGAP1	312.775	-0.942004	0.232932	-4.04411	5.25224e-05	0.00145029
VCL	679.258	-0.736008	0.182061	-4.04265	5.28512e-05	0.00145601
ENSGALG00000054259	596.996	0.927346	0.230003	4.03188	5.53326e-05	0.00152118
ENSGALG00000051214	614.936	0.820067	0.203629	4.02727	5.64286e-05	0.00154618
PREX1	1466.72	-0.537871	0.133564	-4.02707	5.6477e-05	0.00154618
HSPE1	1110.89	0.665373	0.165418	4.02238	5.76135e-05	0.00157401
TRHDE	466.695	0.805256	0.200327	4.0197	5.82721e-05	0.0015887
EPCAM	305.967	1.01688	0.25365	4.00898	6.09813e-05	0.00165912
PACRG	440.058	0.934623	0.23325	4.00695	6.15073e-05	0.00166997
SH3BP5	2639.49	0.614194	0.15342	4.00335	6.24522e-05	0.00168865
NECTIN1	1390.34	-0.64868	0.162023	-4.00362	6.23811e-05	0.00168865
MAGI1	3031.39	-0.569622	0.142404	-4.00004	6.33317e-05	0.00170891
ENSGALG00000054848	92.5792	1.69468	0.424215	3.99485	6.47342e-05	0.00174318
CACNG3	163.311	1.19926	0.30043	3.99182	6.55681e-05	0.00175843
UBAC1	507.139	0.715935	0.179344	3.99197	6.55262e-05	0.00175843
FAM89A	6177.14	0.568529	0.142572	3.98766	6.67294e-05	0.0017823
STON2	1153.69	-0.616589	0.154617	-3.98784	6.6679e-05	0.0017823
KCNAB1	1756.03	0.539244	0.135333	3.98457	6.76015e-05	0.00180193
MELK	205.022	-0.967577	0.24319	-3.97869	6.92963e-05	0.00184336
PRKCE	1479.27	0.497922	0.125219	3.97639	6.99679e-05	0.00185747
MAPRE2	10610	0.495914	0.124816	3.97315	7.09278e-05	0.00187916
HOXB4	1168.61	-0.798373	0.201075	-3.97052	7.17157e-05	0.00189621
TK2	1309.22	0.68698	0.173072	3.96932	7.20766e-05	0.00190192
MAML2	375.069	-0.889572	0.224439	-3.96353	7.3849e-05	0.00194479
SDHAF4	523.057	0.694442	0.175283	3.96182	7.43802e-05	0.00195486
RAB11A	2170.44	0.461603	0.116626	3.95798	7.55862e-05	0.00198259
ATP6V1C1	1050.78	0.757553	0.191436	3.95721	7.5831e-05	0.00198505
VPS39	2925.27	0.627583	0.158613	3.95669	7.59962e-05	0.00198542
MTX2	2131.15	0.671623	0.169849	3.95423	7.678e-05	0.00200192
ENSGALG00000052274	565.974	1.06462	0.269397	3.95186	7.75462e-05	0.00201789
REL	679.491	0.710134	0.179725	3.95122	7.77542e-05	0.00201931
RASGEF1B	793.316	-0.613991	0.155455	-3.94963	7.8272e-05	0.00202874
CYB5A	1195.32	0.578226	0.146434	3.9487	7.85753e-05	0.00203259
ZFP36L1	49.1604	-2.15654	0.546539	-3.94581	7.95313e-05	0.00205328
SARDH	53.2231	-2.12912	0.540334	-3.94038	8.13527e-05	0.00209619
SLC6A11	167.387	-1.10918	0.281554	-3.9395	8.16508e-05	0.00209975
NASP	1548.22	-0.74571	0.18939	-3.93743	8.23595e-05	0.00211384
ENSGALG00000007841	103.757	1.30151	0.330906	3.93316	8.38364e-05	0.00214755
ENSGALG00000040371	744.998	0.806219	0.205009	3.93261	8.40275e-05	0.00214826
HIST1H101	249.471	-0.918657	0.233762	-3.92989	8.49861e-05	0.00216855
SYT14	1062.14	0.589505	0.150083	3.92785	8.57082e-05	0.00217962
FITM2	1580.96	0.600426	0.152868	3.92773	8.57518e-05	0.00217962
ECM2	48.8887	-2.30728	0.58754	-3.92703	8.60019e-05	0.00218176
CTH	1919.19	0.621414	0.158291	3.92576	8.64564e-05	0.00218906
BAALC	45.6247	1.98493	0.505832	3.92409	8.70596e-05	0.0022001
MSI2	731.37	-0.61637	0.157093	-3.9236	8.7234e-05	0.00220027
ENSGALG00000032066	268.389	-1.23487	0.314805	-3.92265	8.75802e-05	0.00220477
DTL	106.854	-1.37531	0.350817	-3.92031	8.8436e-05	0.00221359
DNAH1	539.442	-0.797187	0.20333	-3.92065	8.83105e-05	0.00221359
ADCY7	372.282	-1.02446	0.261308	-3.92049	8.83676e-05	0.00221359
RTN1	22418.2	1.67813	0.428294	3.91817	8.92244e-05	0.00222908
SEC11C	652.656	0.792613	0.202512	3.9139	9.08183e-05	0.0022646
YWHAZ	10666.6	0.466923	0.119333	3.91278	9.12414e-05	0.00227084
SETBP1	4926.19	-0.658609	0.168533	-3.90789	9.31056e-05	0.00230495
CFLAR	1073.87	0.699223	0.17893	3.90781	9.31369e-05	0.00230495
PLK3	400.308	-0.858966	0.219848	-3.9071	9.34107e-05	0.00230495
LRP1	3041.85	-0.671206	0.171783	-3.90728	9.33394e-05	0.00230495
ENSGALG00000044866	129.127	-1.30882	0.335001	-3.9069	9.34889e-05	0.00230495
LRFN5	482.971	0.86568	0.221632	3.90593	9.38637e-05	0.00230986
IGSF11	180.162	-1.21652	0.311707	-3.90276	9.51005e-05	0.00233592
GDPD5	1368.27	0.650244	0.166645	3.90197	9.54118e-05	0.00233919
ENSGALG00000051365	366.357	1.20143	0.307952	3.90136	9.56548e-05	0.00234078
KLF6	882.973	0.935706	0.239971	3.89925	9.64931e-05	0.00234962
ENSGALG00000036566	21.6436	-3.39195	0.86978	-3.89978	9.62804e-05	0.00234962
UBE2G1	2061.58	0.580255	0.148823	3.89895	9.66088e-05	0.00234962
ENSGALG00000002561	29.751	-3.06031	0.784966	-3.89865	9.67313e-05	0.00234962
SNCB	616.445	0.94557	0.242613	3.89745	9.72111e-05	0.00235692
ENSGALG00000050442	462.963	0.886134	0.227738	3.89102	9.98241e-05	0.00241582
PRKCZ	1423.82	0.522229	0.134273	3.88932	0.000100525	0.00242831
GLO1	2230.8	0.898159	0.230996	3.8882	0.00010099	0.00243507
NIPA1	1741.34	0.699839	0.18017	3.88432	0.000102616	0.00246974
RALYL	966.19	0.666031	0.171676	3.87959	0.000104634	0.0025137
TBC1D14	1104.78	0.64008	0.165076	3.87748	0.000105542	0.0025309
TMEM229B	2557.21	0.602554	0.155429	3.87672	0.000105875	0.00253424
WDR1	1830.06	0.663301	0.171192	3.8746	0.0001068	0.00255175
STK38L	1365.53	-0.577329	0.149171	-3.87024	0.000108728	0.00258948
COL4A1	59.4161	-2.3888	0.617357	-3.8694	0.000109105	0.00258948
KNSTRN	193.538	-1.18899	0.307292	-3.86926	0.000109168	0.00258948
TIMM50	69.0395	-1.57528	0.407111	-3.86942	0.000109096	0.00258948
DLGAP5	420.171	-1.01184	0.262018	-3.86173	0.000112589	0.00266582
ARSH	53.8263	-1.83766	0.476563	-3.85608	0.000115222	0.00272326
EWSR1	606.249	-0.853509	0.22156	-3.85227	0.000117028	0.00276097
ZEB2	1774.79	-0.519028	0.134863	-3.84856	0.000118816	0.0027967
LRP8	1094.52	-0.763556	0.198417	-3.84824	0.000118968	0.0027967
PBX3	5042	0.50733	0.131917	3.84584	0.000120139	0.00281919
AGPAT5	742.043	0.676094	0.175843	3.84486	0.000120619	0.0028254
RALA	3550.2	0.503511	0.130989	3.84391	0.00012109	0.00283139
CRB2	901.414	-0.696175	0.181168	-3.8427	0.000121688	0.00284033
TENM2	4290.48	0.527558	0.137431	3.83871	0.000123683	0.00288177
GTSE1	260.86	-1.09733	0.286221	-3.83384	0.00012616	0.00292463
CFTR	255.435	-1.34403	0.350577	-3.83378	0.00012619	0.00292463
LHX9	121.676	-1.71364	0.446932	-3.83422	0.000125964	0.00292463
SASH1	1079.48	-0.80541	0.210126	-3.83299	0.000126595	0.00292884
ENSGALG00000048239	1413.44	0.769554	0.200794	3.83256	0.000126818	0.00292884
ENSGALG00000049441	140.228	-1.36037	0.355041	-3.83159	0.000127319	0.00293526
SOX2	170.645	-1.34798	0.352015	-3.82933	0.000128494	0.00295543
ENSGALG00000051282	603.13	0.847079	0.221225	3.82904	0.000128644	0.00295543
TMEM167A	878.147	1.05145	0.274748	3.82694	0.000129745	0.00297552
CENPC	202.636	-0.958683	0.250581	-3.82584	0.000130327	0.00298367
ISM1	48.0769	-2.40952	0.629979	-3.82477	0.000130897	0.0029915
CPE	3302.16	0.581505	0.15217	3.82143	0.000132682	0.0030218
ENSGALG00000005774	1943.65	-0.487677	0.127605	-3.82176	0.000132502	0.0030218
PTN	6944.64	-0.719924	0.188502	-3.81919	0.00013389	0.00302832
VAPA	2923.04	0.582651	0.15253	3.81992	0.000133494	0.00302832
ENSGALG00000050964	100.663	-1.33885	0.350483	-3.82003	0.000133436	0.00302832
GATA2	64.2116	-2.05794	0.538804	-3.81947	0.000133739	0.00302832
TAC1	1241.96	0.804753	0.211157	3.81116	0.000138318	0.00312308
RNF213	99.3677	-1.33634	0.350772	-3.80972	0.000139122	0.00313586
AACS	1914.43	0.602942	0.15833	3.80812	0.000140027	0.00315085
WRB	2506.91	0.713163	0.18739	3.80578	0.000141358	0.00317536
CCSER1	717.155	0.714853	0.187933	3.80377	0.000142512	0.00318494
ENSGALG00000051502	205.819	-1.24243	0.326599	-3.80415	0.000142292	0.00318494
ENSGALG00000048376	298.065	0.912732	0.239929	3.80417	0.00014228	0.00318494
CELSR2	498.535	-0.945847	0.24877	-3.80209	0.000143479	0.00320112
ENSGALG00000042374	335.525	0.928328	0.244224	3.80113	0.000144038	0.00320749
ENSGALG00000053054	117.527	1.2551	0.330222	3.80076	0.000144253	0.00320749
BROX	3144.84	0.530704	0.139678	3.79949	0.000144995	0.00320771
NKD1	548.997	-1.00346	0.264069	-3.79998	0.000144706	0.00320771
ENSGALG00000054322	44.7064	-1.98818	0.523232	-3.79981	0.000144809	0.00320771
DYNC1LI1	2519.05	0.433227	0.114057	3.79834	0.000145668	0.00321718
NDE1	1052.39	-0.618937	0.16304	-3.79623	0.000146912	0.0032392
ALG3	144.766	-1.10443	0.290975	-3.79563	0.000147267	0.0032416
GAD1	934.342	0.989839	0.260853	3.79463	0.000147866	0.00324935
ENSGALG00000030510	241.52	0.869807	0.229278	3.79369	0.000148427	0.00325623
STK32A	81.0782	1.61581	0.425973	3.79321	0.000148711	0.00325702
ELAPOR1	77.2144	-1.4353	0.378517	-3.7919	0.000149497	0.00326878
BIRC3	1380.8	-0.574205	0.151517	-3.7897	0.00015083	0.00328172
RAMP3	51.3231	1.78987	0.472216	3.79035	0.000150436	0.00328172
CAB39	3921.71	0.618391	0.163177	3.78969	0.000150838	0.00328172
ATP6V1D	2938.9	0.499728	0.132035	3.78482	0.000153819	0.00332456
UNC13D	35.3064	-2.10965	0.557355	-3.78511	0.000153642	0.00332456
DDR1	1464.82	-0.691729	0.18273	-3.78553	0.000153383	0.00332456
ALPL	24.0165	-2.52224	0.666334	-3.78524	0.000153559	0.00332456
APLP2	9410.51	0.432078	0.114213	3.78309	0.000154895	0.00334232
PCDH10	877.545	0.736781	0.194963	3.77908	0.000157411	0.00337911
FAM222A	93.8282	-1.50837	0.399069	-3.77973	0.000156998	0.00337911
MMD	5819.07	0.540887	0.143114	3.77941	0.000157201	0.00337911
GNB1	22040.1	0.508355	0.134531	3.77873	0.000157629	0.00337911
RAP1GDS1	3829.54	0.495168	0.131081	3.77759	0.000158356	0.00338074
VTI1A	833.208	0.836769	0.22152	3.7774	0.000158476	0.00338074
ENSGALG00000051558	483.085	0.943585	0.249759	3.77798	0.000158108	0.00338074
UBE2C	150.347	-1.16296	0.308144	-3.77407	0.000160604	0.00342058
LOXL1	77.5971	-1.3361	0.354106	-3.77317	0.000161188	0.00342747
VCAN	7845.51	0.489441	0.129882	3.76835	0.00016433	0.00348863
ENSGALG00000007028	781.304	0.854158	0.22671	3.76763	0.000164806	0.0034931
ITPRID1	40.0997	-2.38515	0.634362	-3.75993	0.000169963	0.0035908
SLIT3	8894.26	0.778891	0.207146	3.7601	0.000169843	0.0035908
SCG5	1214.38	0.609046	0.162087	3.75753	0.000171599	0.00361805
ATRNL1	4602.3	0.48927	0.130221	3.75723	0.000171803	0.00361805
ELOVL5	4327.68	0.449338	0.119762	3.75191	0.000175493	0.00368396
GRPEL2	550.867	0.877078	0.233758	3.75208	0.000175375	0.00368396
MAT2B	1099.07	0.938723	0.250692	3.74453	0.000180735	0.00378794
RYR2	1730.47	0.590127	0.157657	3.74311	0.000181756	0.00379724
CORO2B	407.348	0.711562	0.19009	3.74329	0.000181629	0.00379724
NME3	1050	0.613361	0.163959	3.74094	0.000183331	0.00382406
TCP11L1	1622.7	0.568617	0.152068	3.73924	0.000184577	0.00384395
RGS7BP	215.115	1.26537	0.3386	3.73707	0.000186177	0.00386632
AUTS2	5897.36	-0.514389	0.137648	-3.73698	0.00018624	0.00386632
PRKCI	1915.49	0.643443	0.172316	3.73409	0.000188394	0.00390488
ENSGALG00000051580	969.122	0.757636	0.202939	3.73332	0.000188974	0.00391073
KIF18A	260.763	-1.03622	0.277668	-3.73186	0.00019007	0.00392723
ENSGALG00000042375	35.3741	-2.3835	0.639116	-3.72938	0.000191954	0.00395993
ENSGALG00000050535	43.8705	-2.01987	0.541916	-3.72727	0.000193563	0.00398684
MOB4	2565.12	0.590522	0.158454	3.72678	0.000193943	0.00398843
ENSGALG00000050092	173.664	-1.13449	0.304886	-3.72102	0.000198417	0.00407406
SV2C	2816.39	0.547528	0.147164	3.72054	0.0001988	0.00407556
GALNT1	1463.51	0.67051	0.180239	3.72012	0.000199132	0.004076
ACTR3	3587.19	0.606046	0.162954	3.71914	0.000199905	0.00408546
NCOA7	732.039	0.729111	0.196101	3.71805	0.000200769	0.00409674
TMEM181	2484.76	0.591903	0.159353	3.71443	0.000203664	0.00414939
ATP6V1A	4243.19	0.553405	0.149066	3.71249	0.000205228	0.00416831
ATP2A2	12229.6	0.436552	0.11758	3.71282	0.00020496	0.00416831
HOXA4	1658.64	-0.633497	0.170706	-3.71104	0.000206413	0.00418592
CALD1	131.661	-1.42752	0.385121	-3.70668	0.000209991	0.0042519
FAM181A	134.071	-1.02291	0.276002	-3.70616	0.000210423	0.0042541
CZIB	282.002	0.857539	0.231443	3.70519	0.000211233	0.00426392
ENSGALG00000026278	2100.56	0.573125	0.15479	3.70259	0.000213407	0.00430119
FAM103A1	2442.02	0.583334	0.15759	3.70158	0.000214259	0.00431176
TMEM175	512.421	0.855723	0.231265	3.70018	0.000215449	0.00432907
ENSGALG00000051780	686.3	0.877266	0.237125	3.69959	0.000215944	0.0043324
VAV2	1556.91	-0.557435	0.150919	-3.6936	0.000221105	0.00442918
ENSGALG00000049689	77.3104	-1.30552	0.353653	-3.69154	0.0002229	0.00445834
NCAN	1387.16	-0.767058	0.207847	-3.69049	0.000223824	0.00447002
SIKE1	2841.02	0.458216	0.124306	3.6862	0.000227625	0.00453903
KIDINS220	28083.2	0.508356	0.138009	3.68351	0.000230044	0.00458032
DMRT3	201.678	1.13167	0.307353	3.68199	0.000231421	0.00460076
PI4K2B	309.962	0.788197	0.214138	3.68079	0.000232515	0.00460857
EPHA2	29.9324	-3.14241	0.85368	-3.68101	0.00023231	0.00460857
IL1RAPL2	294.8	1.29208	0.351321	3.67777	0.000235282	0.00465638
ELMOD1	2450.88	0.785633	0.213646	3.67726	0.000235751	0.00465864
ASNS	1897.9	0.693198	0.188641	3.6747	0.000238131	0.00469862
UBLCP1	1307.61	0.597992	0.162797	3.67323	0.000239503	0.0047186
ENSGALG00000023179	113.013	1.81405	0.494141	3.67111	0.000241498	0.00475079
SMO	74.9329	-1.3828	0.376818	-3.66969	0.000242847	0.00476306
PTPN5	819.294	0.693676	0.189019	3.66988	0.000242663	0.00476306
TPRKB	268.322	0.748037	0.203916	3.66836	0.000244113	0.00478076
COX11	525	0.711453	0.194064	3.66608	0.0002463	0.00481641
ENSGALG00000033570	169.692	-1.17035	0.319276	-3.66563	0.000246727	0.00481759
MTPN	3556.19	1.20105	0.327917	3.66268	0.000249591	0.00486629
PTTG2	292.382	-1.07818	0.294695	-3.65862	0.000253577	0.00493668
MAP6	22225.7	0.46141	0.126209	3.65593	0.000256251	0.00498134
ARMC1	1976.22	0.606889	0.166039	3.6551	0.000257084	0.00499017
SLAIN1	796.812	-0.562972	0.154127	-3.65266	0.000259537	0.00502527
FKBP1B	215.864	1.12669	0.308472	3.65247	0.000259728	0.00502527
HN1	14025.3	0.441085	0.120774	3.65216	0.00026004	0.00502527
SLC23A2	778.075	0.626607	0.171592	3.65173	0.000260482	0.00502643
PLEKHG1	839.059	-0.678415	0.185825	-3.65082	0.000261405	0.00503684
ENSGALG00000054474	269.657	-0.885187	0.24272	-3.64695	0.000265374	0.00510584
GSE1	692.399	-0.81263	0.222867	-3.64626	0.000266089	0.00511209
BCL9	806.475	-0.618622	0.169698	-3.64542	0.000266955	0.00511416
TM9SF3	3306.68	0.723312	0.198418	3.6454	0.000266975	0.00511416
SNTG2	47.9746	1.73503	0.47628	3.64287	0.000269616	0.00515724
ENSGALG00000039958	699.751	0.738015	0.202628	3.64222	0.000270302	0.00516285
AOX1	85.9015	-1.53193	0.420763	-3.64084	0.000271748	0.00518294
FANCI	113.634	-1.25001	0.343397	-3.64012	0.00027251	0.00518994
LMBRD1	515.617	0.808166	0.22224	3.63646	0.00027641	0.005249
WWC2	412.486	-0.69667	0.191564	-3.63674	0.000276109	0.005249
TPD52	386.886	0.825341	0.227156	3.63336	0.000279752	0.0053048
COG6	2090.9	0.671287	0.185044	3.62772	0.000285932	0.00541417
PIGC	87.2126	-1.42883	0.393928	-3.62713	0.000286584	0.00541871
RHEB	412.54	0.731318	0.201898	3.62221	0.000292094	0.00551496
ST6GALNAC2	56.9344	-1.85373	0.512025	-3.62039	0.000294156	0.0055352
ENSGALG00000032606	108.016	-1.37091	0.378688	-3.62015	0.00029443	0.0055352
GFPT1	2786.76	0.46818	0.129301	3.62086	0.000293624	0.0055352
YIPF4	1527.42	0.633455	0.175005	3.61965	0.000295	0.005538
MBIP	808.318	0.703505	0.194627	3.61463	0.000300776	0.00563837
ENSGALG00000047321	110.161	-1.44331	0.399471	-3.61304	0.000302623	0.00566492
HSP90AA1	27177.8	0.519833	0.143984	3.61035	0.000305783	0.00571592
ENSGALG00000054463	354.052	0.830613	0.230168	3.60873	0.000307703	0.00574364
DYNC1LI2	3462.36	0.428154	0.118666	3.60805	0.000308503	0.0057504
PTPRR	185.143	1.08542	0.300952	3.60663	0.000310195	0.00577376
ZFP36L2	68.0043	-1.51485	0.420127	-3.6057	0.000311319	0.00578647
TMEM117	387.134	0.974203	0.27048	3.60175	0.000316079	0.00586186
OTUD6A	1118.38	0.543702	0.150971	3.60136	0.00031656	0.00586186
EPB41L5	673.288	-0.641154	0.178037	-3.60123	0.000316713	0.00586186
CCNK	1356.61	0.597719	0.166039	3.59988	0.000318366	0.00588418
TBCA	1146	0.720871	0.200328	3.59846	0.000320107	0.00590804
PTDSS1	1787.37	0.495013	0.137582	3.59795	0.00032073	0.00591124
TMEM30A	2515.04	0.653401	0.18168	3.59643	0.000322609	0.00593754
ENSGALG00000050814	56.425	1.73196	0.481864	3.5943	0.000325263	0.00597801
ENSGALG00000044733	76.732	1.57198	0.437453	3.59349	0.000326273	0.00597986
ENSGALG00000049151	401.441	0.783642	0.218071	3.59351	0.00032625	0.00597986
HOXB6	655.843	-0.78973	0.219794	-3.59304	0.00032684	0.00598189
ID1	225.715	-1.03393	0.287806	-3.59246	0.000327573	0.00598697
ANLN	319.995	-1.05451	0.293618	-3.59144	0.000328855	0.00599657
HDGFL3	4658.25	0.583257	0.162407	3.59132	0.00032901	0.00599657
ZNF469	62.5107	-1.6948	0.472117	-3.5898	0.000330936	0.00602331
NTF3	191.828	1.56702	0.436709	3.58824	0.000332915	0.00602685
ENSGALG00000010718	2618.96	-0.434975	0.121188	-3.58925	0.000331627	0.00602685
NDRG1	255.499	-1.05275	0.293334	-3.58892	0.000332051	0.00602685
SERINC5	642.351	0.877246	0.244486	3.58811	0.000333078	0.00602685
CCDC92	1364.62	0.592875	0.165245	3.58784	0.000333424	0.00602685
HOXA5	1575.72	0.723193	0.201624	3.58684	0.000334716	0.00604135
BTBD17	110.73	-1.49483	0.416793	-3.5865	0.000335146	0.00604135
ENSGALG00000020322	17442.5	0.53248	0.148559	3.58429	0.000337994	0.00608436
OSGIN2	308.403	0.803129	0.224322	3.58026	0.000343256	0.00617063
FAM3B	74.0257	1.65238	0.461605	3.57964	0.000344072	0.00617512
ARSJ	26.186	-3.4452	0.962616	-3.579	0.000344916	0.00617512
UBE2L3	3823.56	0.619022	0.172944	3.57933	0.000344477	0.00617512
MRC2	61.37	-1.99329	0.557351	-3.57636	0.000348412	0.00622076
RAB11B	7141.92	0.480142	0.134254	3.57638	0.000348382	0.00622076
ENSGALG00000019284	607.514	0.715821	0.200248	3.57466	0.00035068	0.00623583
ENSGALG00000051993	672.528	0.715841	0.200226	3.57517	0.000349996	0.00623583
IQGAP2	2795.49	-0.518886	0.145152	-3.57478	0.000350526	0.00623583
GLMN	572.639	0.938815	0.262717	3.57349	0.00035226	0.00625548
SRI	2277.91	0.606652	0.169883	3.57101	0.000355614	0.00629801
MARCHF11	167.102	1.13472	0.317745	3.57116	0.000355407	0.00629801
F2RL1	108.565	-1.69952	0.476288	-3.56826	0.000359358	0.00635574
RNF113B	267.315	-0.828268	0.23236	-3.56458	0.000364436	0.00643689
ENSGALG00000011040	4210.29	0.533832	0.149819	3.56317	0.000366402	0.00646294
MTMR2	907.381	0.696979	0.195743	3.56069	0.000369882	0.00650318
FERMT1	102.509	-1.39517	0.39178	-3.56111	0.000369288	0.00650318
DLL4	83.6921	-1.58142	0.444158	-3.56049	0.000370168	0.00650318
FOXP1	1988.29	0.793937	0.223563	3.55129	0.000383348	0.00672573
LRRN3	823.919	0.739517	0.20851	3.54667	0.000390133	0.00683564
2022-09-05	2545.44	0.428266	0.120883	3.54283	0.000395862	0.00692679
ENSGALG00000016815	179.265	1.01962	0.287865	3.54202	0.00039708	0.00693887
ZCCHC24	66.1947	-1.9094	0.539344	-3.54024	0.000399769	0.00697658
ENSGALG00000053388	302.377	0.942758	0.266331	3.5398	0.000400429	0.00697884
LETM1	758.543	0.608983	0.172062	3.53933	0.000401141	0.00698198
PPM1B	2781.83	0.485935	0.137332	3.53839	0.000402574	0.00699765
PBK	190.847	-1.27313	0.359935	-3.53712	0.000404516	0.00702212
TGIF1	271.922	-0.740506	0.209662	-3.5319	0.00041259	0.00714341
ENSGALG00000047562	246.694	0.88935	0.251785	3.53218	0.000412145	0.00714341
TTL	5635.7	0.428293	0.121277	3.53153	0.000413166	0.00714397
SLC25A26	868.366	-0.723537	0.204994	-3.52955	0.00041626	0.007188
SLC32A1	865.291	0.607746	0.172364	3.52595	0.000421963	0.00727693
GPATCH2	2035.57	0.530608	0.150504	3.52553	0.000422633	0.00727893
CCDC181	128.293	1.70698	0.484965	3.51979	0.00043189	0.00742863
KIF11	1166.93	-0.528528	0.150181	-3.51928	0.000432716	0.00743042
RBFOX1	4143.66	0.523157	0.148665	3.51903	0.000433125	0.00743042
EPB42	259.825	-0.783131	0.222764	-3.51551	0.000438906	0.00751976
EPS8	261.446	-0.992552	0.282584	-3.51241	0.000444068	0.00759399
GGT7	285.464	0.849779	0.24195	3.51221	0.000444394	0.00759399
CDK8	2043.24	0.600851	0.171181	3.51002	0.000448068	0.00763692
ENSGALG00000053885	390.601	0.920642	0.262285	3.51008	0.000447975	0.00763692
NHLH1	4132.91	-1.2973	0.369719	-3.50889	0.000449986	0.00765968
BDH1A	2180.97	0.43797	0.124857	3.50778	0.000451869	0.00768178
TMEM56	1717.09	0.619621	0.176807	3.5045	0.00045746	0.00776677
CREG2	245.394	0.914663	0.261078	3.50342	0.000459332	0.00777236
LRP2	869.999	-0.741224	0.21158	-3.50328	0.000459563	0.00777236
SLC4A10	595.591	0.876914	0.250284	3.50368	0.000458881	0.00777236
COPS9	2110.16	0.518562	0.148082	3.50184	0.000462049	0.00780435
PRELP	176.382	-1.43193	0.409336	-3.49819	0.00046843	0.00790198
TMEM68	812.11	0.706935	0.202221	3.49586	0.000472545	0.00796117
EXOC5	7632.29	0.488214	0.139769	3.49301	0.000477612	0.00803623
LRRFIP2	1141.16	0.595236	0.170465	3.49184	0.000479712	0.00806124
NBEAL1	2563.31	0.453689	0.129943	3.49145	0.000480403	0.00806255
ENSGALG00000006989	155.821	1.45032	0.415687	3.48898	0.000484876	0.00812724
PRKX	296.114	0.867769	0.248858	3.48701	0.000488461	0.00815612
VAV3	1086.73	0.617325	0.177014	3.48744	0.000487663	0.00815612
PCDHAC1	713.729	0.66237	0.189939	3.48727	0.000487985	0.00815612
ENSGALG00000046879	23.4138	2.67476	0.767239	3.48622	0.000489904	0.00816984
PCDH17	670.413	0.657187	0.188586	3.48482	0.000492471	0.00820224
BET1	268.963	1.16203	0.333831	3.48089	0.000499753	0.00831298
OSBPL8	2254.44	0.453238	0.130235	3.48015	0.000501134	0.00832541
NREP	33646	1.14448	0.328969	3.47899	0.0005033	0.00834031
FGD3	4380.03	0.471622	0.135551	3.4793	0.00050273	0.00834031
ENSGALG00000047753	37.366	2.09242	0.602077	3.47534	0.000510204	0.00844407
NUDT14	1883.8	0.425696	0.122512	3.47472	0.000511388	0.00845301
LRRTM3	1654.47	0.518904	0.149477	3.47145	0.000517649	0.00854576
TRA2A	5341.2	0.618403	0.178338	3.46759	0.000525138	0.00865852
LANCL2	715.615	0.693074	0.200057	3.46439	0.000531434	0.00872089
DCUN1D4	1105.94	0.637194	0.183909	3.46472	0.000530781	0.00872089
PTCH1	2397.46	-0.622828	0.179756	-3.46486	0.000530512	0.00872089
SLC30A7	1065.52	0.562742	0.162455	3.46398	0.000532239	0.00872089
ANKRD11	3118.54	-0.578938	0.167121	-3.46419	0.000531821	0.00872089
EOGT	301.526	0.719825	0.207939	3.46171	0.000536754	0.00878391
NRN1	567.632	-0.667559	0.192871	-3.46117	0.000537828	0.00879055
TDRD12	473.629	0.731308	0.211332	3.46048	0.000539216	0.00880228
RIOK2	620.887	0.753593	0.217806	3.45993	0.000540323	0.00880941
TJP1	2446.05	-0.419323	0.121297	-3.45701	0.000546211	0.00889438
SOX9	90.5424	-1.67858	0.486318	-3.45162	0.00055724	0.00906274
ENSGALG00000051098	37.7268	-1.79161	0.519151	-3.45104	0.00055843	0.00906683
PCBP4	191.492	-1.12142	0.324973	-3.45083	0.000558872	0.00906683
GOLT1B	1195	0.668941	0.194186	3.44484	0.000571387	0.00925845
ENSGALG00000054300	84.9268	1.36266	0.39585	3.44237	0.000576632	0.009309
CEP192	351.126	-0.820169	0.238213	-3.44301	0.000575287	0.009309
ENSGALG00000050982	209.407	1.01286	0.294226	3.44247	0.000576429	0.009309
IFT172	648.751	-0.686956	0.199666	-3.44052	0.00058059	0.00936139
KANK4	222.033	-1.02086	0.296973	-3.43755	0.000586996	0.00943631
ADGRG1	226.399	-0.969616	0.282081	-3.43737	0.000587391	0.00943631
CYBC1	4851.05	0.441385	0.128404	3.43748	0.000587153	0.00943631
LCT	699.461	-0.896137	0.260754	-3.43671	0.000588818	0.00944769
SAR1B	1362.77	0.450966	0.1313	3.43463	0.000593362	0.00950898
HADHB	887.224	-0.586923	0.170966	-3.43298	0.000596978	0.00955529
GRK5	881.526	0.518227	0.151054	3.43074	0.000601929	0.00961111
ENSGALG00000049357	94.717	1.72413	0.502531	3.4309	0.000601591	0.00961111
PCNA	2437.69	-0.442641	0.12904	-3.43026	0.000603011	0.00961671
AMIGO2	395.609	0.876959	0.255737	3.42914	0.000605491	0.00963841
ZBTB26	820.267	0.648976	0.189262	3.42899	0.000605839	0.00963841
ANP32B	793.076	-0.61903	0.180662	-3.42645	0.000611525	0.0097171
FRMD4A	801.192	-0.631897	0.184578	-3.42348	0.000618258	0.0097942
ENSGALG00000008032	736.473	0.74272	0.216946	3.42353	0.000618136	0.0097942
ELK4	258.359	-0.818643	0.239137	-3.42332	0.000618612	0.0097942
AHSA2	1174.02	0.720926	0.210662	3.42219	0.000621186	0.00982311
CACNA1B	1820.7	0.543118	0.158785	3.42046	0.000625146	0.00987385
RFXAP	1168.95	0.608953	0.178132	3.41855	0.000629546	0.00993141
CKAP2	883.172	-0.64311	0.188383	-3.41384	0.000640545	0.0100566
ENSGALG00000054052	361.079	-0.912595	0.267293	-3.41421	0.000639678	0.0100566
ENSGALG00000052823	85.5103	1.57462	0.461169	3.41441	0.000639208	0.0100566
TMEM38A	1737.56	0.53821	0.157645	3.41406	0.000640014	0.0100566
HMGCS1	4631.04	0.63096	0.184935	3.4118	0.00064536	0.0101201
CACNA1C	1746.61	0.497313	0.145793	3.41108	0.000647052	0.0101346
TEK	23.0844	-3.82883	1.12392	-3.40667	0.000657603	0.0102876
ENSGALG00000032808	662.121	0.547335	0.160801	3.4038	0.000664549	0.0103839
NACC2	139.16	-1.01213	0.297573	-3.40129	0.000670688	0.0104674
VPS13A	2428.85	0.544114	0.160008	3.40054	0.000672518	0.0104835
LRRC49	1043.72	0.562885	0.165597	3.39913	0.000676006	0.0105254
GPN3	584.919	0.795933	0.234223	3.39819	0.000678336	0.0105491
VAMP1	521.175	0.629701	0.185446	3.3956	0.000684779	0.0105951
DOP1A	2022.17	0.486243	0.143186	3.39588	0.000684078	0.0105951
RRM2	651.491	-0.811401	0.238972	-3.39539	0.000685321	0.0105951
LIPG	151.368	-1.07324	0.31608	-3.39547	0.000685111	0.0105951
LDLRAD3	421.958	-0.678093	0.199699	-3.39558	0.000684834	0.0105951
NRARP	174.491	-1.01969	0.300459	-3.39377	0.000689381	0.0106453
QPCT	1415.92	0.494589	0.145752	3.39336	0.00069042	0.0106488
CECR2	302.514	-0.996299	0.293739	-3.39179	0.00069438	0.0106974
ATP6V0A2	1378.55	0.594085	0.175272	3.38951	0.000700183	0.0107741
AHCYL1	1007.21	-0.562065	0.165865	-3.38868	0.000702291	0.0107939
ENSGALG00000013624	510.242	-0.672817	0.198648	-3.38698	0.000706673	0.0108486
LYPLA1	1659.82	0.605793	0.178956	3.38515	0.000711404	0.0109085
SMOC1	1118.81	-0.622955	0.18412	-3.38343	0.000715876	0.0109642
ENSGALG00000053091	1473.36	0.56415	0.166854	3.38109	0.000721983	0.0110449
PNPLA3	1009.47	0.677243	0.200425	3.37904	0.0007274	0.0111136
MAPK4	13829.6	0.375424	0.111113	3.37875	0.000728164	0.0111136
COBLL1	169.209	-1.11311	0.329653	-3.37661	0.000733839	0.0111872
ENSGALG00000054478	84.5784	1.50997	0.447419	3.37484	0.000738575	0.0112464
PTBP2	2957.39	0.642625	0.190443	3.37436	0.000739871	0.0112531
PLEKHB2	1643.06	0.480834	0.142741	3.36857	0.00075558	0.0114787
EML5	1171.88	0.509398	0.151253	3.36785	0.000757556	0.0114954
PNPLA7	418.697	-0.806881	0.239648	-3.36694	0.000760064	0.0115202
SUB1	8867.1	1.09346	0.3249	3.36552	0.000763992	0.0115531
FAM168B	6875.34	0.460805	0.136909	3.36578	0.000763285	0.0115531
ANKFN1	586.653	-0.768894	0.228531	-3.3645	0.000766822	0.0115825
CEP63	173.226	-0.963046	0.286519	-3.36119	0.000776064	0.0117087
ENSGALG00000015249	252.065	-0.833381	0.248042	-3.35984	0.000779877	0.0117527
ACTR2	3088.03	0.469532	0.139776	3.35917	0.000781759	0.0117676
ENSGALG00000012847	115.355	-1.07159	0.319107	-3.3581	0.000784807	0.0117999
SCOC	3065.14	0.4101	0.122286	3.35361	0.000797658	0.0119795
FBXO9	2272.45	0.449579	0.134097	3.35264	0.000800462	0.0120078
HADHA	846.781	-0.543651	0.162187	-3.352	0.00080229	0.0120104
TSPAN6	210.832	-0.930424	0.277577	-3.35195	0.000802458	0.0120104
KCTD8	95.552	1.78784	0.533454	3.35144	0.000803933	0.0120188
CEP112	385.354	-0.656946	0.196102	-3.35003	0.000808028	0.0120662
TPST1	1158.82	0.481091	0.14364	3.34929	0.000810203	0.012085
MSN	1416.12	-0.494604	0.147721	-3.34823	0.000813302	0.0121175
BICC1	649.967	-0.687609	0.205393	-3.34778	0.000814624	0.0121234
ENSGALG00000031548	19.6801	-2.40262	0.717838	-3.34703	0.000816834	0.0121426
FAM241A	38.4654	1.93065	0.577424	3.34355	0.000827147	0.012282
ENSGALG00000038549	305.583	0.816619	0.244484	3.34017	0.000837272	0.0124183
CAV1	18.7227	3.80744	1.1404	3.33869	0.000841739	0.0124705
CHD7	10690.2	-0.425167	0.127359	-3.33834	0.000842802	0.0124721
C7	57.0201	1.58656	0.475365	3.33757	0.000845146	0.0124928
ENSGALG00000046425	55.8901	-1.6818	0.50398	-3.33704	0.000846761	0.0125026
ENSGALG00000044272	195.673	-1.09076	0.326928	-3.33639	0.000848746	0.0125178
RETREG1	1413.74	0.547044	0.164103	3.33355	0.000857459	0.012618
ENSGALG00000046550	146.297	-1.39937	0.419774	-3.33362	0.000857235	0.012618
STXBP5L	1191.21	0.476987	0.143112	3.33296	0.000859277	0.0126306
GDPD4	362.436	-0.760629	0.228387	-3.33044	0.000867077	0.012705
PRKD1	109.796	-1.3873	0.416531	-3.33059	0.000866616	0.012705
C20H20ORF24	1295.91	0.504266	0.151413	3.33039	0.00086724	0.012705
SNRK	1131.16	0.502141	0.150839	3.32899	0.000871604	0.0127547
RASL11A	73.7053	-1.40647	0.422575	-3.32832	0.00087371	0.0127713
BTBD6	777.368	-0.691495	0.20786	-3.32674	0.00087868	0.0128297
ARL4A	767.111	0.547745	0.16472	3.32531	0.000883198	0.0128683
CA2	402.82	0.989219	0.297497	3.32514	0.000883735	0.0128683
ENSGALG00000047956	82.8638	1.54237	0.463908	3.32472	0.000885071	0.0128683
ARPC1A	2681.58	0.441448	0.132792	3.32436	0.000886218	0.0128683
PLAGL2	407.244	-0.776893	0.233678	-3.32463	0.000885369	0.0128683
ITGB8	420.587	-0.786839	0.236755	-3.32342	0.000889197	0.0128973
ENSGALG00000051499	275.885	0.98583	0.29688	3.32064	0.000898119	0.012998
USP13	303.708	0.69962	0.210677	3.32081	0.000897556	0.012998
CELF2	1972.69	-0.59389	0.178995	-3.31792	0.000906898	0.0130962
COL2A1	141.742	-1.33793	0.403229	-3.31803	0.000906552	0.0130962
KLF12	858.381	-0.58314	0.175781	-3.31742	0.000908518	0.0131052
CYB5R1	3075.13	0.484704	0.146141	3.31669	0.00091089	0.013125
ENSGALG00000002232	4216.93	-0.54874	0.165554	-3.31456	0.000917867	0.0132111
EXOC6	876.211	0.641377	0.193568	3.31344	0.000921568	0.0132394
ENSGALG00000047491	162.785	1.09916	0.331735	3.31335	0.00092185	0.0132394
STK26	1320.29	0.518364	0.156473	3.31281	0.000923629	0.0132504
GUCY1A1	830.533	0.551623	0.166535	3.31235	0.00092515	0.0132578
TJP2	242.472	-1.04633	0.316075	-3.3104	0.000931634	0.0133306
HYDIN	51.2528	-1.82691	0.551919	-3.31011	0.000932588	0.0133306
FSCN1	1485.45	-0.563559	0.170264	-3.30991	0.000933272	0.0133306
SPIRE1	1104.02	-0.508533	0.15368	-3.30905	0.000936134	0.0133569
BCL2	1682.56	0.507029	0.153277	3.30793	0.000939885	0.0133814
ENSGALG00000027159	38.3297	-1.75607	0.530855	-3.30801	0.000939606	0.0133814
IBTK	4461.7	0.49621	0.150027	3.30747	0.000941428	0.0133889
SNRPD3	2993.12	0.689184	0.208497	3.30549	0.000948115	0.0134694
ENSGALG00000050213	457.908	-0.566913	0.171607	-3.30355	0.000954701	0.013519
TSKU	94.572	-1.30939	0.396541	-3.30204	0.000959836	0.013519
NUMA1	283.045	-0.772211	0.233855	-3.3021	0.000959633	0.013519
DPP6	3562.15	0.50166	0.151861	3.30341	0.000955158	0.013519
ENSGALG00000053293	92.0611	1.19969	0.363092	3.3041	0.000952804	0.013519
CDO1	255.175	-0.788297	0.238713	-3.30228	0.00095901	0.013519
PLPPR4	358.048	0.780971	0.236504	3.30215	0.000959481	0.013519
PLXNB3	4179.39	-0.471814	0.142884	-3.30208	0.000959704	0.013519
SLC30A4	2374.45	0.412002	0.124788	3.30162	0.000961267	0.0135246
ELOVL4	762.172	0.523433	0.158644	3.29941	0.000968885	0.0136172
SET	7571.73	0.458487	0.139008	3.29828	0.00097279	0.0136575
EIF5A2	3750.33	0.564953	0.171361	3.29686	0.000977705	0.0136972
ENSGALG00000040770	1398.91	-0.625471	0.189705	-3.29707	0.000977005	0.0136972
PCDH18	510.665	-1.60467	0.48713	-3.29413	0.000987278	0.0138166
CSMD1	1173.46	0.582468	0.176969	3.29135	0.000997088	0.0139095
UNC79	2787.8	0.429141	0.130379	3.29149	0.000996585	0.0139095
LAMB2	48.3452	-1.46481	0.445015	-3.2916	0.000996176	0.0139095
SCLY	63.5658	-1.31632	0.399992	-3.29086	0.000998802	0.0139179
REEP2	1220.92	0.518195	0.157478	3.29058	0.000999806	0.0139179
RIMS2	3722.39	0.425371	0.129298	3.28984	0.00100245	0.01394
TTK	329.238	-0.88912	0.270323	-3.28911	0.00100506	0.0139467
AXIN2	243.292	-1.04072	0.316403	-3.28921	0.00100467	0.0139467
NYAP2	1288.7	0.594353	0.180786	3.2876	0.00101045	0.0140066
MASP1	363.028	-0.893867	0.272012	-3.28612	0.00101576	0.0140655
CNRIP1	807.325	1.38737	0.42238	3.28465	0.00102109	0.0141244
AIG1	346.544	0.79337	0.241597	3.28386	0.00102397	0.0141493
DOCK9	2239.39	0.470171	0.143215	3.28299	0.00102714	0.0141782
TMEM47	678.933	-0.631584	0.192408	-3.28253	0.0010288	0.0141863
ENSGALG00000047565	324.55	-0.800511	0.243909	-3.28201	0.00103071	0.0141977
FAM129A	167.556	-1.54917	0.472079	-3.28159	0.00103223	0.0142037
MID1	732.636	-0.627132	0.191131	-3.28117	0.00103379	0.0142103
PIK3R1	1085.09	0.656817	0.200358	3.27822	0.00104465	0.0143064
COL3A1	155.604	-1.46273	0.446213	-3.27809	0.00104513	0.0143064
TM4SF1	20.9424	-2.63412	0.803522	-3.27821	0.00104466	0.0143064
COMMD7	1098.78	0.557244	0.169968	3.27853	0.00104348	0.0143064
ENSGALG00000011283	560.799	0.900676	0.27495	3.27578	0.00105369	0.0144085
ENSGALG00000013155	3471.15	0.545844	0.166673	3.27494	0.00105686	0.0144241
TMEM41B	935.832	0.580319	0.177219	3.2746	0.00105813	0.0144241
TNS1	324.527	-0.770867	0.235399	-3.27473	0.00105764	0.0144241
PODXL	727.075	-0.631896	0.193031	-3.27354	0.00106208	0.014448
MGST2	43.6298	-1.65033	0.504131	-3.27362	0.0010618	0.014448
GALNT12	48.1464	-1.74419	0.532928	-3.27284	0.00106473	0.0144691
HSPA4L	2363.58	0.467536	0.142956	3.2705	0.00107358	0.0145443
ENSGALG00000033770	106.069	-0.98531	0.301239	-3.27085	0.00107224	0.0145443
DSCAML1	274.107	-0.852703	0.260713	-3.27065	0.00107299	0.0145443
ENSGALG00000031266	550.405	0.584066	0.178657	3.2692	0.00107852	0.0145961
HOXA7	2524	0.450889	0.137934	3.26887	0.00107979	0.0145983
AK5	563.989	0.898354	0.275004	3.26669	0.00108813	0.0146959
NEK2	129.457	-1.09418	0.335056	-3.26567	0.00109204	0.0147184
GOLIM4	757.715	-0.640645	0.19616	-3.26593	0.00109104	0.0147184
ENSGALG00000009458	815.397	-0.529533	0.162177	-3.26516	0.00109403	0.0147302
CNTNAP5	1541.62	0.524193	0.160601	3.26394	0.00109875	0.0147785
FBLN5	48.7202	-2.39952	0.735698	-3.26156	0.00110803	0.0148881
DDTL	784.231	0.691292	0.212241	3.25711	0.00112551	0.0151076
IQCC	38.8834	-1.57477	0.483729	-3.25548	0.00113203	0.0151796
HNRNPM	4941.02	-0.592186	0.181923	-3.25514	0.00113335	0.0151819
UHRF1BP1L	978.828	0.503951	0.15489	3.25361	0.00113951	0.0152312
PTPN14	139.057	-1.12875	0.346928	-3.25355	0.00113972	0.0152312
OGDHL	1351.27	0.43351	0.13325	3.25335	0.00114051	0.0152312
ENSGALG00000015418	76.149	1.25892	0.387072	3.25241	0.00114431	0.0152663
CHN1	1972.9	-0.524158	0.161177	-3.25207	0.00114567	0.015269
PAQR7	73.6345	-1.49968	0.46124	-3.25142	0.0011483	0.0152886
AKAP8	461.889	-0.813527	0.250233	-3.25108	0.00114969	0.0152916
CBX3	6339.14	0.515203	0.158492	3.25065	0.00115143	0.0152992
ENSGALG00000038923	322.645	0.713445	0.219506	3.25023	0.00115314	0.0153064
ARSA	206.955	-1.07676	0.331446	-3.24869	0.00115939	0.0153739
ENSGALG00000011285	3282.74	0.425553	0.131064	3.24691	0.00116666	0.0154547
TBC1D12	946.824	0.52504	0.16176	3.24579	0.00117127	0.0155002
C2CD2	429.349	0.702703	0.21677	3.2417	0.0011882	0.0157084
COPS2	2036.99	0.448316	0.138329	3.24094	0.00119135	0.0157214
ENSGALG00000054011	145.293	1.07461	0.331578	3.24089	0.00119158	0.0157214
ILF3	945.695	-0.724292	0.223562	-3.23978	0.00119622	0.0157669
HACD2	1828.16	0.440569	0.136006	3.23933	0.00119813	0.0157761
ZDHHC17	3555.68	0.379395	0.117283	3.23487	0.00121697	0.0159944
MARCHF6	4644.29	0.445252	0.137643	3.23483	0.00121714	0.0159944
PAIP1	1961.49	1.2978	0.401612	3.23146	0.00123159	0.0161681
ENSGALG00000001476	388.776	0.656284	0.203119	3.23103	0.00123344	0.0161763
EPHA3	1708.5	-0.523218	0.161984	-3.23005	0.00123767	0.0162156
CRIPT	1327.85	0.531144	0.16455	3.22786	0.00124721	0.0163243
ZWILCH	590.094	-0.625532	0.193864	-3.22665	0.00125247	0.0163605
NOP53	351.614	-0.920921	0.285409	-3.22667	0.00125238	0.0163605
GABRA5	61.1478	1.81773	0.56369	3.2247	0.00126105	0.0164074
CARNMT1	818.745	0.690956	0.214243	3.22511	0.00125925	0.0164074
MEX3B	348.391	-0.783684	0.242987	-3.22521	0.00125879	0.0164074
CERCAM	249.267	-0.838406	0.259973	-3.22498	0.00125983	0.0164074
AP2A2	8873.08	0.362147	0.112461	3.2202	0.00128101	0.0166506
CUX2	531.357	-0.868797	0.269858	-3.21946	0.00128432	0.0166772
CYP51A1	3556.1	0.460706	0.143121	3.21899	0.00128641	0.0166878
ALDH4A1	224.093	-0.748773	0.23267	-3.21818	0.00129007	0.0167187
CALCA	329.806	-0.927709	0.288352	-3.21728	0.00129412	0.0167547
MFAP1	1010.14	-0.579509	0.180207	-3.2158	0.00130083	0.016825
B3GALT1	491.571	0.643349	0.200172	3.21398	0.00130907	0.0169149
GTF2A1	3090.4	0.461277	0.1436	3.21225	0.00131702	0.0170009
SNORA62	37.1528	-1.9687	0.612993	-3.21161	0.00131993	0.0170081
GNPDA2	1003.41	0.521845	0.162489	3.21156	0.00132016	0.0170081
NWD2	904.274	0.65486	0.203943	3.21099	0.0013228	0.0170253
EXTL2	392.32	0.774491	0.241296	3.20972	0.00132866	0.017084
ARFGAP1	2101.32	0.475035	0.14814	3.20665	0.00134288	0.0172332
MYT1	4523.53	-0.592633	0.184805	-3.2068	0.0013422	0.0172332
TMEM26	144.975	-2.65599	0.828776	-3.20471	0.00135197	0.0173329
SLC25A46	395.477	0.627968	0.195977	3.20428	0.00135398	0.0173418
UCHL3	887.392	0.615695	0.192297	3.20179	0.00136578	0.0174759
ADSS	1416.27	0.498483	0.155738	3.20077	0.00137059	0.0175043
NHSL1	2933.42	-0.355251	0.11099	-3.20076	0.00137067	0.0175043
SAT1	1129.51	-0.502915	0.157181	-3.19959	0.00137622	0.0175412
ENSGALG00000053741	82.0157	1.59547	0.498626	3.19972	0.00137559	0.0175412
ARVCF	2816.54	0.427044	0.13349	3.19909	0.00137864	0.017555
SUCLA2	1691.94	0.516925	0.161647	3.19785	0.00138455	0.0176132
RIMKLB	2062.49	0.492424	0.154015	3.19724	0.00138751	0.0176337
SNAPC5	912.643	0.44706	0.139863	3.19642	0.00139144	0.0176666
ENSGALG00000038432	86.3157	1.37999	0.431787	3.19599	0.00139351	0.0176758
RHNO1	99.7137	-1.01215	0.316724	-3.19567	0.00139505	0.0176782
ENSGALG00000054057	259.538	0.745613	0.233459	3.19377	0.00140428	0.017761
SRXN1	214.089	-1.32599	0.415161	-3.19391	0.0014036	0.017761
ENSGALG00000052261	800.435	0.630737	0.197601	3.19197	0.00141304	0.0178212
ENSGALG00000037816	570.88	-0.542478	0.169951	-3.19196	0.00141311	0.0178212
PITX2	39.7129	2.3168	0.725809	3.19203	0.00141279	0.0178212
ENSGALG00000042372	82.4935	1.17132	0.367508	3.18719	0.00143663	0.0181004
ATP2B1	5032.8	0.403161	0.126528	3.18635	0.00144081	0.0181184
SLC16A1	392.852	-0.612683	0.192273	-3.18652	0.00143995	0.0181184
ENSGALG00000038978	912.475	0.655957	0.205979	3.18459	0.0014496	0.0182115
PPIB	542.658	-0.610305	0.191723	-3.18326	0.00145626	0.0182777
ZBTB10	734.553	-0.572442	0.179988	-3.18044	0.00147051	0.0184389
UNC5C	972.72	0.636812	0.200287	3.1795	0.00147528	0.0184811
C12orf4	754.981	0.607203	0.190991	3.17923	0.00147669	0.0184811
PRKG2	193.047	-0.816182	0.256768	-3.17868	0.00147949	0.0184985
CRMP1	30064.5	0.363155	0.114263	3.17823	0.00148178	0.0185096
ENSGALG00000034218	1172.08	-0.647796	0.203853	-3.17777	0.00148415	0.0185215
SETD7	1739.97	-0.4457	0.140312	-3.17649	0.00149066	0.0185852
RERGL	69.3793	-1.53199	0.482335	-3.1762	0.00149217	0.0185863
NCK1	1349.31	0.46056	0.145021	3.17581	0.00149419	0.0185939
DNAJC15	636.746	0.697123	0.219882	3.17044	0.00152207	0.0189051
SMARCA4	1633.16	-0.695407	0.219329	-3.17062	0.00152115	0.0189051
MYBL1	482.671	-1.00169	0.315998	-3.16992	0.00152482	0.0189213
ADAM23	1701.88	0.487455	0.153843	3.16852	0.00153217	0.0189945
PSKH1	86.9666	-1.41003	0.445132	-3.16767	0.00153667	0.0190324
COL13A1	78.03	-1.20436	0.380831	-3.16244	0.00156454	0.0193593
UGP2	1795.11	0.441118	0.139506	3.16201	0.00156686	0.0193698
NARS	2894.11	0.415437	0.1314	3.16163	0.0015689	0.0193768
C15H12orf49	2151.73	0.482342	0.152584	3.16116	0.00157143	0.0193898
PRKCA	1434.12	0.461416	0.145993	3.16053	0.00157481	0.0194133
PUDP	396.044	0.764553	0.241982	3.15955	0.00158013	0.0194242
ENSGALG00000009041	191.262	0.977127	0.309259	3.15958	0.00157997	0.0194242
RNF150	1195.95	0.426083	0.134835	3.16003	0.00157755	0.0194242
ZNF362	313.641	-0.836365	0.264793	-3.15856	0.00158551	0.0194721
CRB1	55.9132	-1.66708	0.528086	-3.15684	0.00159489	0.019569
UBE2A	3054.73	0.626881	0.198666	3.15545	0.00160251	0.0196442
ENSGALG00000027540	365.87	-0.945904	0.299826	-3.15484	0.00160585	0.0196668
LGI1	366.584	0.802837	0.25452	3.15431	0.00160878	0.0196843
CSMD3	2417.68	0.627934	0.199139	3.15325	0.00161462	0.0197191
NPR3	132.78	-1.43134	0.453885	-3.15352	0.00161314	0.0197191
PTPRO	4750.97	0.386934	0.122758	3.152	0.00162158	0.0197857
RNASET2	264.793	0.855109	0.27138	3.15097	0.0016273	0.0198004
FUT8	1585.03	0.475237	0.15083	3.1508	0.00162821	0.0198004
ADAM12	188.553	-1.04408	0.33141	-3.15043	0.00163032	0.0198004
GSS	300.861	-0.762447	0.241946	-3.15131	0.0016254	0.0198004
ENSGALG00000034426	267.552	-0.770784	0.24464	-3.15068	0.00162888	0.0198004
ENSGALG00000048771	76.5691	-1.77814	0.564676	-3.14895	0.00163857	0.0198822
STK32B	418.386	0.744291	0.23644	3.14791	0.00164444	0.019935
C1QTNF6	29.4851	-2.34367	0.744726	-3.14702	0.00164945	0.0199774
ENSGALG00000051147	194.318	0.848948	0.269808	3.14649	0.00165243	0.019995
MOSPD2	756.7	0.78981	0.251101	3.14539	0.00165867	0.0200336
JAZF1	1051.87	0.715658	0.227524	3.14541	0.00165852	0.0200336
ENSGALG00000004518	84.1079	-3.37107	1.07198	-3.14471	0.00166252	0.0200617
UGT8	47.2851	-1.80174	0.573515	-3.14158	0.0016804	0.0202588
BRMS1L	442.141	0.862975	0.274728	3.1412	0.00168257	0.0202665
ENSGALG00000011252	62.0631	-1.50103	0.477969	-3.14043	0.001687	0.0202934
NME5	194.733	1.2638	0.40245	3.14027	0.0016879	0.0202934
ZBTB20	806.642	-0.575365	0.18334	-3.13824	0.00169963	0.0204158
ABLIM2	521.877	0.631711	0.201451	3.13581	0.00171383	0.0205675
SLC9A2	100.864	1.15792	0.369526	3.13354	0.00172713	0.0206893
RAB22A	1623.75	0.623644	0.199022	3.13354	0.00172711	0.0206893
NUP50	2972.67	0.420874	0.134334	3.13305	0.00173002	0.0206951
APP	25176.4	0.440436	0.140583	3.13292	0.00173076	0.0206951
FABP7	1475.85	-0.499533	0.159469	-3.13247	0.00173341	0.020708
ADAM10	4167.2	0.435879	0.139176	3.13185	0.00173708	0.0207329
ENSGALG00000034232	167.061	-0.975131	0.311428	-3.13116	0.00174118	0.020763
NOV	374.872	-0.642012	0.205061	-3.13084	0.00174306	0.0207666
ACSBG2	866.171	0.64996	0.207652	3.13005	0.00174779	0.0208041
NHLRC3	1302.86	0.450388	0.144062	3.12636	0.00176986	0.0210287
LRRC40	576.178	0.585139	0.187161	3.12639	0.00176967	0.0210287
ENSGALG00000001720	408.63	0.675508	0.216091	3.12603	0.00177185	0.0210333
CYR61	41.9997	-2.12429	0.680629	-3.12106	0.00180199	0.0213718
NOCT	381.406	0.733715	0.235121	3.12058	0.00180494	0.0213875
ENSGALG00000034941	242.548	0.80773	0.258939	3.11938	0.00181232	0.0214231
ZDHHC21	617.612	0.636111	0.203904	3.11966	0.00181062	0.0214231
AKAP6	10989.4	0.396652	0.127161	3.1193	0.00181283	0.0214231
RPS19	2502.16	-0.476707	0.152853	-3.11873	0.00181634	0.0214452
ENSGALG00000045842	188.478	-0.990629	0.317686	-3.11826	0.00181922	0.0214599
AMER2	246.44	-0.86861	0.278605	-3.11771	0.0018226	0.0214805
RAPGEF2	2611.65	-0.388234	0.124594	-3.11598	0.00183332	0.0215488
BCL11B	2134.74	-0.37859	0.121492	-3.11617	0.00183217	0.0215488
TLE5	231.784	0.742814	0.238372	3.1162	0.00183198	0.0215488
P4HA3	44.6464	-2.31259	0.742244	-3.11568	0.00183521	0.0215518
PAF1	113.298	-0.966779	0.311118	-3.10743	0.00188721	0.0221427
ANP32E	8499.14	0.505954	0.162876	3.10637	0.00189397	0.0222022
ENSGALG00000047971	655.817	0.701391	0.226122	3.10183	0.00192332	0.0225261
ALG12	1864.62	0.577569	0.186239	3.10122	0.00192723	0.0225518
NHS	655.772	-0.598985	0.193186	-3.10055	0.00193158	0.0225827
UTS2B	1961.47	1.19534	0.385624	3.09976	0.00193679	0.0226235
ENTPD6	638.525	0.481024	0.155301	3.09737	0.00195247	0.0227863
IGDCC4	737.204	-0.514927	0.166318	-3.09604	0.00196121	0.0228681
ENSGALG00000003861	894.738	0.434374	0.140326	3.09545	0.00196513	0.0228934
GRIA4	1890.27	0.447826	0.144716	3.09452	0.00197131	0.0229451
LPAR1	109.163	-1.47116	0.475455	-3.09422	0.00197333	0.0229483
KLHL9	6906.06	0.396865	0.128435	3.09001	0.00200148	0.0232551
UBA3	1330.09	0.410175	0.132788	3.08894	0.00200875	0.0233187
TGFB1I1	95.0068	-1.13813	0.368484	-3.08868	0.00201051	0.0233187
CACNA1E	640.021	0.639639	0.207165	3.08759	0.00201786	0.0233628
SOX8	46.4768	-1.92256	0.622642	-3.08775	0.00201681	0.0233628
CACNB2	1514.81	0.491046	0.159062	3.08713	0.00202098	0.0233765
ENSGALG00000054672	36.6262	-2.3346	0.756296	-3.08689	0.00202261	0.0233765
ENSGALG00000035453	420.227	0.701842	0.227385	3.08658	0.00202474	0.0233805
PIGK	1190.95	0.511918	0.165903	3.08564	0.00203112	0.0234337
ENSGALG00000052501	276.012	-0.742629	0.240714	-3.08511	0.00203478	0.0234553
VPS51	136.466	-1.03289	0.334927	-3.08393	0.00204284	0.0235276
ENSGALG00000037400	329.544	0.757382	0.245667	3.08297	0.00204948	0.0235833
ENSGALG00000013674	564.949	0.715731	0.232248	3.08175	0.00205788	0.0236593
ENSGALG00000023601	109.008	0.993176	0.322374	3.08082	0.00206431	0.0237126
SMDT1	880.536	0.615542	0.199885	3.07949	0.00207358	0.0237153
ENSGALG00000035027	1088.57	0.661909	0.214922	3.07977	0.00207159	0.0237153
MCM3	102.768	-1.21636	0.394968	-3.07965	0.00207244	0.0237153
HES6	68.5405	-1.31115	0.425706	-3.07995	0.00207035	0.0237153
HNRNPA1	798.015	-0.873491	0.283577	-3.08026	0.00206819	0.0237153
PRKAG2	1497.36	0.435475	0.141501	3.07753	0.00208722	0.0238505
LRATD1	288.796	0.85232	0.277004	3.07693	0.00209148	0.0238753
ENSGALG00000050007	80.4232	-1.25667	0.408448	-3.07671	0.00209302	0.0238753
CACNG2	467.082	0.726958	0.236333	3.076	0.002098	0.023877
VEGFD	19.6975	-2.9148	0.947542	-3.07617	0.00209681	0.023877
PMP22	53.8423	-1.8761	0.609933	-3.07591	0.00209862	0.023877
VDAC2	7978.09	0.360432	0.117208	3.07516	0.00210391	0.0239166
SLC25A47	49.2035	1.50783	0.490846	3.07191	0.00212695	0.0241575
PDE1C	279.812	0.696	0.226639	3.07097	0.00213366	0.024171
MTFR2	808.817	0.564084	0.183655	3.07143	0.00213037	0.024171
TMEM39B	246.75	-0.640596	0.208587	-3.07111	0.00213261	0.024171
MRPS6	619.037	0.828429	0.26991	3.06928	0.00214576	0.0242333
GINS1	137.211	-1.07535	0.350332	-3.06952	0.002144	0.0242333
IDE	2160.94	0.386264	0.125831	3.06972	0.00214261	0.0242333
ENSGALG00000003819	215.603	0.783053	0.255135	3.06917	0.00214653	0.0242333
MTSS1	1515.98	0.586504	0.191152	3.06825	0.00215314	0.0242663
ENSGALG00000051188	24.4008	-2.27532	0.741564	-3.06827	0.00215304	0.0242663
ENSGALG00000054059	161.479	1.06925	0.348647	3.06687	0.00216314	0.0243423
GLI1	25.0706	-2.17237	0.708351	-3.06681	0.0021636	0.0243423
ECI1	180.632	-0.828478	0.270237	-3.06575	0.00217124	0.0244075
NRBP1	678.188	-0.625398	0.204044	-3.06502	0.00217658	0.0244465
RAB6A	5339.68	0.467332	0.152561	3.06325	0.0021895	0.0245497
TMEM106B	1338.52	0.645684	0.210778	3.06334	0.00218883	0.0245497
ATAD2	276.179	-0.731957	0.239259	-3.05927	0.00221877	0.0248567
HUNK	224.085	-0.714888	0.233729	-3.05861	0.00222365	0.0248901
SGCB	1469.97	0.534358	0.174741	3.058	0.00222822	0.0248988
ENSGALG00000049072	172.48	-1.00364	0.328181	-3.05819	0.00222679	0.0248988
PDHX	591.889	0.633749	0.207495	3.05428	0.00225604	0.0251883
TICAM1	257.134	-0.9485	0.310621	-3.05356	0.00226144	0.0252271
ENSGALG00000001483	148.087	-0.938815	0.30757	-3.05236	0.0022705	0.0253068
GID8	1514.1	0.524415	0.171826	3.052	0.0022732	0.0253153
NOX4	256.163	-0.724548	0.237512	-3.05057	0.00228409	0.0253936
PRMT3	1366.9	0.479986	0.157333	3.05077	0.00228257	0.0253936
SLC2A14	2602.71	0.45655	0.149679	3.05021	0.00228683	0.0254026
ENSGALG00000034511	31.4078	-2.41118	0.790643	-3.04964	0.00229114	0.0254289
LDAH	1792.85	0.447377	0.146749	3.04858	0.00229928	0.0254588
TBC1D19	1155.87	0.514864	0.168889	3.04853	0.00229964	0.0254588
SS18L1	1554.85	0.425462	0.13956	3.04859	0.00229916	0.0254588
LAMP5	6382.17	0.494551	0.162332	3.04653	0.00231496	0.0255853
DNM1	1342.44	0.510108	0.167438	3.04655	0.00231483	0.0255853
TUBAL3	50.4682	-3.54737	1.16475	-3.04561	0.00232208	0.0256424
ENSGALG00000042589	129.783	-1.02704	0.337391	-3.04406	0.00233409	0.0257534
ADCY1	500.32	0.616169	0.202527	3.04241	0.00234693	0.0258433
UBE2E3	4266.9	0.44813	0.147294	3.04242	0.00234685	0.0258433
CAPN15	194.268	-0.928814	0.305305	-3.04225	0.00234814	0.0258433
LZIC	3370.36	0.408527	0.13441	3.03942	0.00237034	0.0260658
PDDC1	848.573	0.54326	0.178784	3.03864	0.00237651	0.0261119
SLC6A15	1109.1	0.44719	0.147201	3.03795	0.0023819	0.0261273
UPF3B	543.666	0.711235	0.234105	3.03811	0.00238067	0.0261273
CDH6	1913.34	0.549775	0.181022	3.03706	0.00238895	0.0261828
FZD3	2446.08	-0.453258	0.149265	-3.0366	0.0023926	0.026201
PLXNA2	3393.35	-0.535258	0.176294	-3.03617	0.00239601	0.0262165
ENSGALG00000048913	207.809	0.83591	0.275369	3.0356	0.0024006	0.0262448
DTX4	159.898	-1.02814	0.338865	-3.03408	0.0024127	0.0263551
DISP1	586.862	-0.680322	0.224336	-3.0326	0.00242455	0.0264407
RBMS1	455.984	-0.656038	0.216318	-3.03275	0.00242338	0.0264407
HELZ2	165.118	-0.899041	0.296502	-3.03215	0.00242816	0.0264581
TIAM2	1012.17	-0.433125	0.142882	-3.03134	0.00243472	0.0265076
SCN3B	2657.34	0.394487	0.130163	3.03071	0.00243982	0.0265411
LAMP2	2166.42	0.457139	0.150953	3.02835	0.00245896	0.0266878
CAMSAP2	7409.21	0.335052	0.110628	3.02863	0.00245666	0.0266878
ENSGALG00000034725	1746.77	-0.558589	0.184457	-3.02829	0.00245939	0.0266878
GAS6	430.941	0.677663	0.223796	3.02803	0.0024615	0.0266886
CTSA	268.317	-0.664936	0.219663	-3.02707	0.00246936	0.0267517
SLC1A2	4074.92	0.425323	0.140636	3.02427	0.00249232	0.0269561
ILF2	2419.61	-0.431029	0.142521	-3.02433	0.00249187	0.0269561
RIC3	1823.39	0.454465	0.150321	3.02329	0.00250045	0.0270217
TSNARE1	453.251	0.692368	0.229056	3.02271	0.00250526	0.0270515
ATP6V1B2	4802.72	0.448167	0.148311	3.0218	0.00251274	0.0271099
ENSGALG00000039659	7650.27	0.406113	0.134488	3.01971	0.0025302	0.0272536
GRM7	455.413	0.656635	0.217448	3.01974	0.00252994	0.0272536
BBS12	258.108	-0.876255	0.290334	-3.0181	0.00254367	0.0273314
UBE2D3	3702.83	0.991765	0.328562	3.0185	0.00254025	0.0273314
FKBP11	24.8032	-1.883	0.623866	-3.01827	0.00254223	0.0273314
PLPP1	354.881	0.597827	0.198127	3.0174	0.00254952	0.0273496
ENSGALG00000044563	246.627	-1.01657	0.336895	-3.01747	0.0025489	0.0273496
TGFB2	959.81	0.674377	0.223557	3.01658	0.0025564	0.027401
TTI2	84.403	-1.14605	0.379988	-3.01603	0.00256112	0.0274292
AP3S1	1787.71	1.15977	0.384656	3.01507	0.00256919	0.0274786
SLF2	1341.62	0.408099	0.135357	3.01499	0.00256991	0.0274786
PDIA4	2416.51	-0.491525	0.163059	-3.01441	0.00257479	0.0275084
STARD3NL	1121.98	0.657318	0.218099	3.01386	0.00257947	0.027536
GABRB3	201.185	0.842176	0.279537	3.01275	0.00258888	0.0275925
DNAJC12	1309.21	0.58527	0.194265	3.01275	0.00258896	0.0275925
AMOTL2	65.7133	-1.25794	0.417634	-3.01205	0.00259488	0.0276331
ENSGALG00000043088	458.211	-1.76209	0.585099	-3.01161	0.00259867	0.0276511
CCDC88A	10637.1	0.432646	0.143684	3.0111	0.00260307	0.0276755
TAGAP	175.201	-1.08876	0.361669	-3.01037	0.00260931	0.0277194
HS6ST3	130.365	1.2327	0.409959	3.00689	0.00263935	0.0280159
SNX4	694.348	-0.485921	0.161893	-3.0015	0.0026865	0.0284933
TRPC5	479.533	0.719667	0.239866	3.00029	0.00269727	0.0285155
C7H2ORF69	1189.21	0.628778	0.209525	3.00097	0.00269118	0.0285155
MAGOH	678.655	0.624681	0.208201	3.00038	0.00269642	0.0285155
MSH4	1854.31	0.533429	0.177779	3.00052	0.00269518	0.0285155
PAX5	294.504	0.759028	0.253068	2.9993	0.00270598	0.0285814
LRIT1	27.8807	1.82306	0.607869	2.99909	0.00270785	0.0285814
UBL3	1208.47	0.515247	0.171851	2.99822	0.00271559	0.0286264
EPHB1	1201.16	-0.536929	0.179088	-2.99812	0.00271647	0.0286264
ENSGALG00000005350	2300	0.400921	0.133832	2.99569	0.00273822	0.0288325
TRIB2	6859.94	0.352979	0.11784	2.99542	0.0027407	0.0288355
ENSGALG00000043013	191.442	1.11332	0.371734	2.99494	0.00274502	0.0288418
MCAM	374.977	-0.638106	0.213067	-2.99486	0.00274568	0.0288418
RCN2	6322.97	0.379479	0.126746	2.99402	0.00275332	0.0288989
RAB9A	1571.05	0.560697	0.187315	2.99334	0.00275938	0.0289394
ENSGALG00000017072	97.0954	-1.0743	0.359131	-2.99139	0.00277712	0.0291021
ST18	3133.38	-0.562005	0.187989	-2.98957	0.00279368	0.0292381
MAFB	968.783	0.696756	0.233069	2.98948	0.00279454	0.0292381
UHRF1	1201.57	-0.55303	0.185114	-2.98752	0.00281255	0.0294031
GJC2	135.142	-1.27393	0.426521	-2.98679	0.00281924	0.0294496
ZBTB1	1387.08	0.422728	0.141588	2.98562	0.00283008	0.0295394
YME1L1	3471.23	0.524351	0.175731	2.98382	0.00284673	0.0296661
GLYCTK	274.479	-0.768871	0.257679	-2.98384	0.00284659	0.0296661
ENSGALG00000049262	273.536	0.689747	0.231258	2.98259	0.00285818	0.0297477
SLC25A48	66.3573	-1.27734	0.428297	-2.98237	0.00286022	0.0297477
SDC4	37.8908	-1.4773	0.495363	-2.98225	0.00286136	0.0297477
TNRC6A	4039.61	-0.376346	0.126235	-2.98131	0.00287019	0.0298159
MLXIP	904.757	-0.445778	0.149583	-2.98014	0.00288112	0.0299058
NISCH	2902.19	0.402506	0.135075	2.97986	0.00288376	0.0299096
TXNRD1	257.573	-0.775515	0.260328	-2.97899	0.00289202	0.0299674
FSTL4	2562.15	0.471886	0.158415	2.97879	0.00289389	0.0299674
SEC61A2	1325.66	0.382256	0.128354	2.97815	0.00289996	0.0300066
ENSGALG00000028294	90.1807	-1.13506	0.381328	-2.9766	0.00291465	0.0301349
ENSGALG00000016285	466.699	0.687484	0.231006	2.97604	0.00291992	0.0301657
YWHAB	10677.4	0.321848	0.108165	2.97554	0.00292476	0.0301919
CHRNA7	382.154	0.664247	0.22327	2.97509	0.00292904	0.0302124
FN3KRP	1597.52	0.427036	0.143599	2.97381	0.00294132	0.0303152
PDCD10	596.13	0.67433	0.226889	2.97207	0.002958	0.0304632
TMPRSS7	20.2431	2.74296	0.923146	2.97132	0.00296525	0.0304901
HMGCR	7980.92	0.404337	0.13607	2.97153	0.0029632	0.0304901
ENSGALG00000052520	570.864	-0.629143	0.211772	-2.97086	0.00296971	0.0305121
ST8SIA6	654.617	0.664364	0.223666	2.97034	0.00297467	0.0305392
ENSGALG00000051678	144.124	1.04229	0.351134	2.96836	0.00299391	0.0306673
NMT2	1152.33	0.558242	0.188066	2.96834	0.00299415	0.0306673
MKKS	1414.86	0.523399	0.1763	2.96879	0.0029897	0.0306673
BEND6	551.319	0.587222	0.197898	2.9673	0.00300431	0.0307338
SH3GL2	241.728	0.991496	0.334153	2.96719	0.00300532	0.0307338
ENSGALG00000053172	49.2947	-1.58802	0.535451	-2.96576	0.00301937	0.0308534
TMEM263	1190.45	-0.421541	0.142384	-2.9606	0.00307043	0.031284
RAB18	2210.95	0.507299	0.171344	2.96071	0.00306927	0.031284
IDH1	4624.18	0.408768	0.138059	2.96083	0.00306815	0.031284
EPHX4	217.576	0.853129	0.288167	2.96054	0.00307103	0.031284
ENSGALG00000036222	42.2747	1.64498	0.5558	2.95966	0.00307979	0.0313489
C20orf194	22530.4	-0.349595	0.118139	-2.95917	0.00308465	0.0313741
ARPP19	5977.33	0.437294	0.147796	2.95877	0.00308871	0.0313911
DHX37	1146.4	-0.442982	0.149761	-2.95793	0.00309709	0.031452
LINGO2	468.809	0.839209	0.283831	2.95672	0.00310926	0.0315025
NLRP3	83.3568	-1.26358	0.427352	-2.95677	0.00310876	0.0315025
JAG2	399.103	-0.620246	0.209764	-2.95687	0.00310778	0.0315025
TFAP2A	557.211	-0.731674	0.247511	-2.95612	0.00311531	0.0315395
SSB	1381.58	0.50965	0.172429	2.95572	0.00311944	0.031557
ZFAND5	2684.23	0.630875	0.213666	2.95262	0.00315092	0.0318509
IDH3A	1266.57	0.534148	0.180923	2.95235	0.00315366	0.0318541
BMPER	73.2504	1.26383	0.428127	2.952	0.00315722	0.0318656
ENSGALG00000052383	99.6231	-1.20021	0.406812	-2.95027	0.00317492	0.0319951
KIFC1	88.716	-1.20834	0.409541	-2.95046	0.00317297	0.0319951
ENSGALG00000048017	269.527	0.906563	0.307424	2.9489	0.00318903	0.0321126
CCDC91	712.795	0.625852	0.212278	2.94827	0.00319559	0.0321541
GFRA1	2822.3	0.389552	0.132157	2.94764	0.00320212	0.0321952
ESPL1	49.8151	-1.52347	0.516954	-2.94702	0.00320854	0.032235
RAB33B	2355.9	0.416684	0.141454	2.94572	0.00322201	0.0323456
TIMM17B	1550.6	0.565359	0.191958	2.94523	0.00322716	0.0323726
RCAN1	827.828	0.512177	0.174005	2.94346	0.00324567	0.0325334
2022-03-01	2076.42	0.444741	0.151217	2.94107	0.00327083	0.0326934
ENSGALG00000048039	209.529	0.860301	0.292495	2.94126	0.00326884	0.0326934
ENSGALG00000048534	69.393	-1.306	0.444068	-2.941	0.00327158	0.0326934
ENSGALG00000054495	84.8257	-1.09832	0.373378	-2.94158	0.00326542	0.0326934
RAB5A	2176.38	0.474192	0.16128	2.94017	0.00328032	0.0327558
MRPL39	546.137	0.624875	0.212595	2.93927	0.00328984	0.0328259
LMO2	197.809	0.761313	0.259068	2.93866	0.00329633	0.0328657
FSTL1	854.811	-1.25802	0.428341	-2.93696	0.00331444	0.0330213
GGPS1	422.523	0.676107	0.230228	2.93669	0.00331736	0.0330253
ENSGALG00000037807	503.235	-0.549378	0.1871	-2.93628	0.00332172	0.0330409
MTMR8	4285.4	0.393307	0.133957	2.93607	0.00332395	0.0330409
PDCL	1481.29	0.443386	0.151062	2.93512	0.00333422	0.0331179
MEIG1	22.8935	-2.46383	0.839526	-2.93479	0.00333772	0.0331276
MTPAP	1859.89	0.545432	0.185893	2.93412	0.00334492	0.033174
FAM122B	1049.48	0.493177	0.168105	2.93375	0.00334899	0.0331893
RFNG	900.037	0.491946	0.167737	2.93284	0.00335872	0.0332607
PDZRN4	1521.35	0.480273	0.163804	2.93199	0.00336797	0.0333272
MTMR6	1462.11	0.423223	0.144358	2.93175	0.00337055	0.0333276
LIFR	1564.34	0.51132	0.174488	2.93039	0.00338533	0.0334235
PRPF3	894.053	-0.466127	0.15906	-2.9305	0.00338413	0.0334235
PFN2	10371.7	0.365049	0.124615	2.92942	0.00339594	0.0335031
RAB19	47.7236	1.57981	0.539601	2.92774	0.00341434	0.0336173
STXBP5	2110.13	0.541226	0.184866	2.92766	0.00341518	0.0336173
ENSGALG00000004878	335.261	-0.634157	0.216609	-2.92766	0.0034152	0.0336173
C1QTNF4	237.888	0.818844	0.279795	2.92658	0.00342706	0.0336837
RER1	1104.99	0.577479	0.19731	2.92677	0.00342504	0.0336837
ENSGALG00000054496	214.4	-0.827962	0.283014	-2.92552	0.00343886	0.0337743
UBE2D1	1029.56	0.57493	0.196552	2.92508	0.00344366	0.0337963
FMNL2	859.417	-0.494387	0.169041	-2.92466	0.00344837	0.0338172
TEAD4	325.801	-0.772498	0.264322	-2.92256	0.00347163	0.0340199
FABP6	213.176	-0.91458	0.313062	-2.9214	0.00348464	0.034122
HPRT1	655.334	0.540258	0.184991	2.92045	0.00349526	0.0342005
GUCY1B1	611.585	0.510155	0.174793	2.91863	0.00351579	0.0343757
ENSGALG00000042928	28.2784	-1.66194	0.569472	-2.91839	0.00351841	0.0343758
ENSGALG00000010943	3074.99	0.579485	0.1988	2.91492	0.00355781	0.0347349
CCDC28A	553.313	0.577455	0.198285	2.91225	0.00358834	0.035007
ASIC4	156.235	-0.870857	0.299156	-2.91105	0.00360217	0.0350925
CXXC5	2676.49	0.449489	0.154409	2.91103	0.00360245	0.0350925
PPP2R2B	331.631	0.683596	0.234935	2.90973	0.00361744	0.0352125
NSDHL	798.685	0.535924	0.184333	2.90737	0.00364483	0.0354436
ENSGALG00000039964	90.8101	-1.07427	0.369518	-2.90722	0.00364658	0.0354436
MKS1	541.348	-0.537426	0.184875	-2.90697	0.00364944	0.0354452
ENSGALG00000007381	110.572	-0.942436	0.324273	-2.9063	0.00365727	0.035495
MTMR7	553.222	0.551642	0.189838	2.90585	0.00366258	0.0355079
GDF10	48.6032	-1.83438	0.631299	-2.90573	0.00366401	0.0355079
CHORDC1	734.35	0.530301	0.182659	2.90322	0.00369343	0.0357667
PLEK	74.5241	1.04285	0.359404	2.90161	0.00371255	0.0358725
FNTA	502.536	0.567319	0.195513	2.90169	0.00371158	0.0358725
ATP1B3	4559.91	0.399445	0.137652	2.90186	0.00370957	0.0358725
DHX38	1018.05	-0.521172	0.179757	-2.89931	0.00373983	0.0360831
PUSL1	97.0406	-0.951169	0.328063	-2.89935	0.0037394	0.0360831
SCARF2	20.681	-2.38161	0.82161	-2.89871	0.00374702	0.0361259
TMEM164	527.301	0.550321	0.189897	2.89799	0.00375557	0.0361553
KIF23	429.023	-0.670242	0.231266	-2.89814	0.00375388	0.0361553
TLN1	191.59	-0.902052	0.311376	-2.89698	0.00376771	0.0362456
TMEM132B	778.42	0.65259	0.225323	2.89624	0.00377658	0.0363044
KLHDC8A	265.014	-0.82627	0.285339	-2.89574	0.00378262	0.0363358
UBE2K	2010.86	0.39943	0.137995	2.89453	0.00379727	0.0364268
CRTC1	614.057	-0.679974	0.234919	-2.8945	0.00379764	0.0364268
RCBTB2	645.037	0.483897	0.167218	2.89381	0.003806	0.0364493
FILIP1	308.371	-0.675218	0.233341	-2.8937	0.00380729	0.0364493
AKR1A1	1182.77	0.51962	0.179574	2.89362	0.0038083	0.0364493
PAPPA	632.407	-0.552138	0.190885	-2.89252	0.00382166	0.0365505
ENSGALG00000016268	297.231	-0.687507	0.237732	-2.89195	0.0038286	0.0365903
CISD1	3724.35	0.42255	0.146137	2.89147	0.00383445	0.0366195
ENSGALG00000031667	80.5562	1.29818	0.449276	2.88949	0.00385867	0.0368241
TRMT2B	176.968	-0.992003	0.343357	-2.88913	0.00386309	0.0368395
ENSGALG00000051263	285.702	0.749892	0.25958	2.88887	0.00386634	0.0368438
BICD2	2541.38	0.371306	0.128597	2.88735	0.00388497	0.0369945
HKDC1	104.206	-1.3195	0.457155	-2.88632	0.00389771	0.0370621
GABRG2	1664.75	0.458073	0.158703	2.88635	0.0038974	0.0370621
EBF3	5033.01	-0.350661	0.121517	-2.88569	0.0039056	0.0371103
CPSF2	1946.54	0.420798	0.14584	2.88533	0.00390999	0.0371251
MAEL	24.2914	2.21088	0.766624	2.88392	0.00392763	0.0372657
ATP6V1E1	1754.21	0.394902	0.137057	2.88131	0.00396028	0.037326
SLC9A7	287.691	0.737425	0.255808	2.88273	0.00394241	0.037326
VBP1	1813.07	0.374962	0.130068	2.88281	0.00394142	0.037326
ABHD18	688.705	0.48531	0.168442	2.88117	0.00396204	0.037326
NOVA1	16378.3	0.386815	0.134244	2.88143	0.00395875	0.037326
DIS3L2	538.128	-0.562045	0.195033	-2.88179	0.00395421	0.037326
PXK	698.912	0.471597	0.163602	2.88258	0.00394429	0.037326
ENSGALG00000005291	220.379	-0.809835	0.281082	-2.88114	0.00396239	0.037326
ZNFX1	168.934	-0.944828	0.327848	-2.88191	0.00395272	0.037326
ENSGALG00000007575	1927.75	0.426325	0.147934	2.88186	0.00395334	0.037326
LCP1	102.642	0.981405	0.340687	2.88066	0.00396842	0.0373327
ENSGALG00000050196	218.63	-0.856799	0.297434	-2.88063	0.00396878	0.0373327
PLEKHF2	100.602	-1.31189	0.455679	-2.87897	0.00398971	0.0375027
H2AZ2	272.94	-0.698035	0.242543	-2.87798	0.00400226	0.0375938
SLC2A12	37.1	-1.62591	0.565095	-2.87724	0.00401173	0.0376558
EPHB3	254.253	-0.851594	0.296038	-2.87664	0.00401933	0.0377002
ENSGALG00000049354	292.659	0.657093	0.228483	2.8759	0.00402883	0.0377624
ENSGALG00000054317	190.62	-0.818645	0.28473	-2.87516	0.00403821	0.0378233
ENSGALG00000016934	46.445	-1.46514	0.510269	-2.8713	0.00408783	0.038212
MDH1	2785.86	0.407167	0.141795	2.87151	0.0040851	0.038212
SFRP2	232.833	-0.924364	0.321937	-2.87126	0.00408843	0.038212
EYA2	176.37	-0.774246	0.26974	-2.87034	0.0041003	0.0382917
TESC	29.6484	1.76392	0.614575	2.87015	0.00410279	0.0382917
RNF138	260.373	0.785103	0.273656	2.86894	0.00411845	0.0383834
ITGAV	657.696	-0.452266	0.15764	-2.86898	0.00411802	0.0383834
HS6ST2	188.27	-0.787975	0.274715	-2.86833	0.00412641	0.0384303
NCAPG2	226.096	-0.718234	0.250462	-2.86764	0.00413546	0.0384873
ENSGALG00000015032	244.149	0.774792	0.270372	2.86565	0.00416149	0.0387022
RNF13	3223.11	0.474578	0.165684	2.86436	0.00417857	0.0388336
ENSGALG00000034549	1345.74	0.421182	0.147054	2.86413	0.00418153	0.0388336
ENSGALG00000001536	140.307	-0.862444	0.30121	-2.86327	0.00419299	0.0389125
RAD23B	2148.81	0.584592	0.204186	2.86304	0.00419595	0.0389125
NLGN4Y	2692.79	0.367192	0.128273	2.86258	0.00420205	0.0389415
ENSGALG00000054358	90.2427	0.995163	0.347749	2.86173	0.00421341	0.0390097
ZNF326	5126.87	0.430895	0.150579	2.86158	0.00421534	0.0390097
ENSGALG00000047577	152.17	1.17712	0.412099	2.85639	0.00428486	0.0396031
ENSGALG00000041514	630.385	-0.503694	0.176342	-2.85635	0.00428549	0.0396031
KCNE2	23.6581	2.15962	0.75631	2.85547	0.00429732	0.0396845
C12orf29	446.315	0.570042	0.199673	2.85487	0.0043054	0.0397036
USP1	1502.11	-0.411374	0.144095	-2.85487	0.00430542	0.0397036
MLC1	255.92	-1.08029	0.378551	-2.85376	0.00432054	0.0398036
ZBED1	1285.85	0.362048	0.126879	2.85348	0.00432427	0.0398036
JAM3	1007.31	-0.499991	0.175236	-2.85324	0.00432764	0.0398036
FCRL4	216.694	-0.853744	0.299225	-2.85318	0.00432839	0.0398036
TCF7L2	295.607	-0.829452	0.290798	-2.85233	0.00433998	0.0398823
C1QL3	40.9459	1.80101	0.63169	2.8511	0.00435686	0.0399662
CDC42EP3	621.329	0.665598	0.233516	2.85033	0.00436736	0.0399662
EMB	140.356	0.959075	0.336474	2.85037	0.00436682	0.0399662
ENSGALG00000050522	412.63	-0.72132	0.253007	-2.85099	0.00435834	0.0399662
PPIG	1698.44	0.659224	0.231247	2.85074	0.00436178	0.0399662
NWD1	549.661	-0.492985	0.172957	-2.85034	0.00436729	0.0399662
SYT17	95.8188	1.06002	0.372205	2.84794	0.00440036	0.0402402
ENSGALG00000045550	441.554	-0.888161	0.311914	-2.84746	0.00440702	0.040273
SLC22A5	248.392	-0.710532	0.249614	-2.84652	0.00442005	0.040364
OBSL1	133.282	-0.845535	0.297202	-2.84499	0.00444135	0.0405304
DNMT3A	2083.31	-0.526027	0.184962	-2.84397	0.00445553	0.0406192
FHOD1	32.4168	-1.59054	0.559291	-2.84385	0.00445726	0.0406192
TXNDC9	1686.61	0.383109	0.134729	2.84355	0.00446145	0.0406292
ABHD3	241.2	0.839681	0.295376	2.84275	0.00447258	0.0406891
RARA	32.2439	-1.52534	0.536594	-2.84264	0.00447422	0.0406891
EPAS1	56.2763	-1.44983	0.510085	-2.84233	0.00447848	0.0406997
ERC2	2011.43	0.45696	0.16086	2.84074	0.00450093	0.0408754
LIMD1	126.911	-0.991674	0.349365	-2.83851	0.00453252	0.0411197
MYLK	208.358	-0.828718	0.291967	-2.8384	0.00453409	0.0411197
ENSGALG00000050666	58.4072	1.27263	0.448444	2.83787	0.00454154	0.0411588
gga-mir-125b-2	194.507	0.928216	0.327156	2.83723	0.00455074	0.0412138
ENSGALG00000032941	498.339	-0.76992	0.271547	-2.83531	0.00457816	0.0414031
THBS1	279.595	-0.599975	0.211624	-2.8351	0.0045811	0.0414031
ENSGALG00000039924	5942.13	0.358722	0.126518	2.83535	0.00457752	0.0414031
HORMAD1	110.072	-1.22145	0.430949	-2.83433	0.0045922	0.0414749
WNT3	29.3516	-1.77678	0.627033	-2.83364	0.00460218	0.0415366
MORC2	1269.97	-0.422199	0.14913	-2.83108	0.00463915	0.0418415
ENSGALG00000052222	745.606	-0.527412	0.186325	-2.83059	0.00464617	0.0418761
NLGN1	1570.4	0.398504	0.140825	2.82978	0.00465795	0.0419535
TTLL2	20.8462	-2.30963	0.816425	-2.82895	0.00467008	0.0420149
CCSER2	3380.06	0.358339	0.126672	2.82888	0.00467117	0.0420149
SNCAIP	1027.17	-0.480819	0.170041	-2.82767	0.00468885	0.0421451
CDH7	809.398	0.515099	0.182183	2.82737	0.00469325	0.0421558
ENSGALG00000006584	1786.65	-0.431674	0.152729	-2.8264	0.00470745	0.0422545
CLIP2	1810.96	-0.481331	0.170316	-2.8261	0.00471181	0.0422648
ZNF318	2495.37	-0.368032	0.130331	-2.82383	0.00474537	0.0425367
ENSGALG00000028135	73.7034	1.42889	0.506253	2.82247	0.00476547	0.042668
SH3GL3	206.3	0.904177	0.320357	2.8224	0.0047665	0.042668
LRCH2	7205.19	0.371572	0.131688	2.8216	0.0047785	0.0427462
PLD1	63.0318	-1.59241	0.564467	-2.82109	0.00478605	0.0427847
SERPINE2	452.055	-0.586726	0.208092	-2.81954	0.0048092	0.0429624
RAB11FIP3	175.57	-0.8352	0.296316	-2.81862	0.00482308	0.0430571
TFAP2E	40.7783	-1.62196	0.575626	-2.81774	0.00483632	0.043146
FBP1	32.098	2.36374	0.838966	2.81744	0.00484082	0.0431569
KCNK12	33.9517	1.62816	0.578002	2.81688	0.00484933	0.0432035
DIXDC1	1546.47	-0.474654	0.168576	-2.81567	0.00486762	0.0433076
AP1M1	3843.36	0.400413	0.1422	2.81586	0.00486475	0.0433076
NARF	2165.63	0.489559	0.173901	2.81515	0.00487539	0.0433474
ENSGALG00000001049	155.774	-0.854143	0.303508	-2.81424	0.0048893	0.0434417
NTS	51.1585	1.50851	0.536325	2.81268	0.00491301	0.0436229
KCNK1	154.007	0.808873	0.287641	2.8121	0.00492198	0.0436598
KANK1	400.632	-0.539033	0.191731	-2.8114	0.00493258	0.0436598
HM13	1211.06	-0.534617	0.190165	-2.81133	0.00493378	0.0436598
NACA	754.633	-0.628678	0.223586	-2.8118	0.00492656	0.0436598
MINDY1	30.5647	-1.84217	0.655233	-2.81147	0.00493156	0.0436598
CCDC80	238.92	-1.04497	0.371827	-2.81038	0.00494832	0.043759
PHF20	3958.34	0.338215	0.120362	2.80998	0.00495451	0.0437842
CD276	676.686	-0.562341	0.200175	-2.80925	0.00496569	0.0437948
METTL9	1009.76	0.538509	0.191681	2.80939	0.00496348	0.0437948
HNRNPR	5472.1	0.404657	0.144032	2.80951	0.00496177	0.0437948
ARGLU1	4315.78	0.490222	0.17462	2.80737	0.00499476	0.0440215
GALNT9	1566.94	0.443367	0.157948	2.80704	0.00499993	0.0440375
ACSF2	168.497	-0.771543	0.274888	-2.80675	0.00500435	0.044047
ZMIZ1	5716.89	-0.336345	0.119996	-2.80296	0.0050636	0.0445387
SLC9A3R1	102.914	-1.1774	0.420187	-2.80209	0.00507719	0.0446284
ZNF512	675.231	-0.560773	0.200184	-2.80128	0.00508997	0.0447107
RRM2B	282.323	0.620202	0.221452	2.80062	0.00510051	0.0447734
SLC17A6	886.453	-0.583669	0.208448	-2.80006	0.00510925	0.0448202
FUT9	1184.5	0.50016	0.178736	2.79832	0.00513699	0.0450035
ENSGALG00000035743	51.2486	-1.50702	0.538507	-2.79852	0.00513376	0.0450035
PDK1	745.04	0.583872	0.208669	2.79807	0.00514082	0.045007
CYRIB	1699.7	0.414426	0.148175	2.79687	0.00515998	0.0451447
ENSGALG00000019077	966.947	-0.523515	0.187453	-2.79278	0.00522573	0.0456895
CLVS1	986.387	0.50342	0.180363	2.79115	0.00525215	0.0457076
BIRC5	110.224	-1.17018	0.419167	-2.79168	0.00524344	0.0457076
SPOCK3	1878.37	0.478351	0.17138	2.79117	0.00525174	0.0457076
SUSD6	2094.38	-0.461048	0.165165	-2.79144	0.00524734	0.0457076
ENSGALG00000047197	55.44	-1.64245	0.588198	-2.79235	0.00523271	0.0457076
KIAA1191	1307.17	0.465052	0.166564	2.79204	0.00523772	0.0457076
MARS	215.732	-0.769495	0.27561	-2.79197	0.00523877	0.0457076
OPN4-1	29.6144	1.67085	0.598906	2.78984	0.00527335	0.0457229
GAS2	137.577	-1.28459	0.460441	-2.78992	0.00527214	0.0457229
H1-10	38.4512	-1.70467	0.611022	-2.78987	0.00527285	0.0457229
SPINK5	51.579	1.59758	0.57266	2.78976	0.00527479	0.0457229
EIF2S2	2450.22	0.368162	0.131941	2.79036	0.00526503	0.0457229
LZTS1	303.462	-0.84942	0.304425	-2.79024	0.00526687	0.0457229
MTNR1B	35.9974	1.55883	0.558816	2.78952	0.00527865	0.0457263
LYPLAL1	86.119	1.11154	0.3985	2.7893	0.00528214	0.0457263
RHBDL3	548.634	-0.642315	0.230462	-2.78708	0.00531849	0.0460107
YLPM1	2262.18	-0.402731	0.144514	-2.7868	0.0053231	0.0460203
CPNE3	522.874	0.514173	0.184546	2.78615	0.00533384	0.0460828
ENSGALG00000043676	253.417	0.584123	0.20985	2.78352	0.00537728	0.0464276
ENSGALG00000052669	158.04	0.778289	0.279697	2.78261	0.00539237	0.0464695
PCSK5	197.414	-0.900026	0.323419	-2.78285	0.00538844	0.0464695
ENSGALG00000047673	779.193	-0.49593	0.178226	-2.78259	0.00539274	0.0464695
KBTBD3	206.032	0.788807	0.28351	2.78229	0.00539762	0.0464811
ENSGALG00000015618	166.34	0.757418	0.272262	2.78195	0.00540338	0.0465002
SUGP1	1133.31	-0.540077	0.194156	-2.78166	0.00540817	0.046511
NIPAL1	30.0514	1.98636	0.714173	2.78134	0.00541344	0.0465259
MRPL10	77.5788	-1.12069	0.403163	-2.77974	0.00544017	0.0467251
TNNC1	66.0682	-1.21801	0.438446	-2.778	0.00546938	0.0469413
GABRA1	352.873	0.831594	0.299369	2.77782	0.00547249	0.0469413
ETV4	49.762	1.64326	0.591722	2.77709	0.00548488	0.0470168
MPZL2	23.3337	2.33611	0.841392	2.77648	0.00549516	0.0470743
ENSGALG00000054392	134.51	-0.836864	0.301723	-2.77362	0.00554362	0.0474585
SEMA5B	2827.74	-0.508353	0.183337	-2.77278	0.00555788	0.0475496
TA3	1117.16	-0.421989	0.152278	-2.77117	0.00558552	0.0477549
PKNOX2	195.808	-0.677104	0.24437	-2.77082	0.0055916	0.0477758
SFXN1	940.36	0.616548	0.222532	2.7706	0.00559534	0.0477767
MMEL1	44.9521	-1.41773	0.511794	-2.77011	0.00560371	0.0478171
GTSF1	734.113	0.501915	0.181258	2.76907	0.00562168	0.0479393
SLC25A12	1199.09	0.4748	0.171502	2.76849	0.00563175	0.047994
TRPC7	380.164	0.661363	0.238954	2.76774	0.00564457	0.0480722
ROR2	214.885	-1.14867	0.415075	-2.76738	0.00565087	0.0480946
AUH	798.228	0.540288	0.195283	2.76669	0.00566284	0.0481653
ENSGALG00000035365	124.563	-0.890292	0.321835	-2.7663	0.00566958	0.0481905
ZCCHC17	633.154	-0.533356	0.192819	-2.7661	0.00567314	0.0481905
MYO3A	404.472	0.606265	0.219209	2.7657	0.0056801	0.0482185
CNPY3	71.8164	-1.09308	0.39531	-2.76512	0.00569015	0.0482726
PARK7	2017.58	0.340833	0.123281	2.76468	0.00569789	0.0483071
ACBD7	62.2013	1.21039	0.437855	2.76437	0.0057032	0.0483209
NDUFB9	1509.21	0.412051	0.14908	2.76395	0.00571057	0.0483522
SLX4IP	170.648	-0.76645	0.277349	-2.76349	0.00571871	0.0483588
PRDM12	31.1502	-1.7646	0.638517	-2.76358	0.00571702	0.0483588
HIST1H110	105.183	-0.878796	0.318168	-2.76205	0.00574401	0.0485415
ATXN7	489.116	-0.479172	0.173519	-2.76149	0.00575375	0.0485925
CDC20	179.619	-0.770405	0.279087	-2.76045	0.00577222	0.0487172
XK	132.497	1.16688	0.422909	2.75917	0.0057949	0.0488459
ENSGALG00000047446	65.4121	-1.18632	0.429931	-2.75933	0.00579208	0.0488459
PBX1	1022.84	-0.466633	0.169256	-2.75696	0.00583409	0.0491447
PTP4A3	580.413	0.628395	0.228057	2.75543	0.0058615	0.049344
TNPO3	159.894	-0.881552	0.320154	-2.75352	0.00589573	0.0496004
PDZD11	456.105	-0.57564	0.209093	-2.75303	0.0059046	0.0496432
POLE	161.117	-1.01429	0.368542	-2.75217	0.00592011	0.0497418
PCNP	3553.92	0.423511	0.153953	2.75091	0.00594293	0.0498664
PDGFD	394.038	-0.738959	0.268644	-2.7507	0.00594677	0.0498664
FAM120A	1216.7	-0.459537	0.167073	-2.75052	0.00595012	0.0498664
ACADS	372.403	-0.59948	0.217951	-2.75053	0.00594985	0.0498664
NT5C3A	603.753	0.565347	0.205562	2.75025	0.00595497	0.0498753
IRS1	125.49	-1.00836	0.366905	-2.7483	0.00599047	0.0501406
GATAD2A	1039.61	-0.439087	0.159793	-2.74785	0.00599869	0.0501775
FLT1	121.388	0.984375	0.358455	2.74616	0.00602966	0.0503157
WWP1	1497.23	0.407996	0.148583	2.74591	0.00603436	0.0503157
NONO	3222.21	-0.453084	0.164973	-2.74641	0.00602507	0.0503157
PHAX	1242.61	0.594624	0.216539	2.74604	0.00603191	0.0503157
INPP5A	1121.89	0.456603	0.16624	2.74666	0.0060206	0.0503157
ZNF423	9654.23	0.45169	0.164535	2.74525	0.00604654	0.0503853
ENSGALG00000008314	2351.55	0.559808	0.203993	2.74425	0.00606489	0.0505062
NUSAP1	471.784	-0.668257	0.24369	-2.74224	0.00610212	0.050784
SOCS1L	20.6085	-2.32452	0.848026	-2.7411	0.00612339	0.0509288
THAP5	582.357	0.483008	0.176252	2.74045	0.00613553	0.0509778
RBSN	1995.45	0.37212	0.135792	2.74037	0.00613705	0.0509778
MACF1	8605.19	-0.466251	0.170171	-2.7399	0.0061458	0.0510183
ZNF687	129.766	-0.821436	0.300009	-2.73803	0.00618077	0.0512762
PARP1	2298.8	-0.433698	0.158458	-2.737	0.00620029	0.0514057
POLE3	1249.44	-0.430055	0.157169	-2.73625	0.00621431	0.0514894
ENSGALG00000050742	3198.7	0.366871	0.134112	2.73556	0.00622742	0.0515656
ENSGALG00000049383	214.679	0.932368	0.340964	2.7345	0.00624749	0.0516991
ENSGALG00000047503	192.279	-0.704051	0.257519	-2.73398	0.00625734	0.0517207
GAL	65.2555	1.44953	0.530195	2.73395	0.00625796	0.0517207
ENSGALG00000026970	48.5553	-1.78954	0.654741	-2.7332	0.0062722	0.0517795
RNF207	139.08	-0.777606	0.284508	-2.73316	0.00627296	0.0517795
SMARCD2	172.121	-0.964305	0.352877	-2.7327	0.00628181	0.05182
NTN1	98.6896	-2.37004	0.867405	-2.73234	0.0062887	0.0518443
FOXD3	67.3826	-1.14449	0.419232	-2.72997	0.00633409	0.0521858
ENSGALG00000026776	217.813	0.881272	0.323056	2.72792	0.00637346	0.0524772
DIPK2A	2103.2	0.486823	0.178475	2.72768	0.00637812	0.0524827
TSSC1	1485.57	0.392256	0.143837	2.72709	0.00638952	0.0525062
ENSGALG00000047308	22.2656	-2.87082	1.05277	-2.72691	0.00639296	0.0525062
ASH1L	3108.4	-0.40646	0.149051	-2.72698	0.00639177	0.0525062
TP53I11	819.882	-0.556356	0.204124	-2.72558	0.00641894	0.0526866
STX2	1047.57	0.49863	0.182961	2.72533	0.00642373	0.052693
TMEM185A	1498.61	0.526055	0.19316	2.72342	0.00646095	0.0529653
ENSGALG00000013001	2764.16	0.336493	0.123601	2.72242	0.00648063	0.0530935
DOP1B	1774.05	0.471339	0.173209	2.72122	0.00650419	0.0532533
HMGN4	7955.81	-0.459003	0.168696	-2.72088	0.00651077	0.053274
TAX1BP1	3676.07	0.354347	0.13025	2.72052	0.006518	0.0533
CDC42SE1	121.084	-0.859494	0.315976	-2.72012	0.00652573	0.0533299
ENSGALG00000035049	140.7	-0.779789	0.286711	-2.71978	0.00653255	0.0533525
GARNL3	2048.04	0.443371	0.163091	2.71855	0.00655697	0.0535187
CENPI	142.137	-0.927806	0.341376	-2.71784	0.00657101	0.0535771
XRCC5	1809.92	0.494424	0.181922	2.71777	0.00657228	0.0535771
EPM2A	110.098	0.949873	0.349539	2.7175	0.00657766	0.0535877
CNTNAP2	1156.5	0.438975	0.161571	2.71691	0.00658949	0.0536509
KIF27	524.534	-0.626923	0.230767	-2.71669	0.00659383	0.0536529
ENSGALG00000023898	18.9137	-2.91178	1.07192	-2.71642	0.00659912	0.0536628
ENSGALG00000026482	124.678	0.973542	0.358523	2.71542	0.00661916	0.0536922
TXNDC5	1310.91	-0.463688	0.170774	-2.71522	0.00662317	0.0536922
RAB12	537.131	0.507032	0.186724	2.7154	0.00661956	0.0536922
PPP2R2C	1828.53	0.443745	0.163416	2.71543	0.00661888	0.0536922
MRPL27	668.907	-0.519002	0.191097	-2.71591	0.00660948	0.0536922
TMEM19	844.678	0.446686	0.164537	2.71481	0.00663145	0.0537262
ENSGALG00000051960	114.371	-0.969859	0.357366	-2.71391	0.00664938	0.0538051
SHCBP1	260.107	-0.849116	0.312874	-2.71392	0.00664913	0.0538051
ENSGALG00000054570	294.251	-0.57655	0.212461	-2.71367	0.0066542	0.0538109
RGS9	156.958	0.741933	0.273555	2.71219	0.00668407	0.0540193
RNF216	315.695	-0.591428	0.218116	-2.71153	0.00669732	0.0540931
NDUFS6	404.232	0.722744	0.26666	2.71036	0.00672108	0.0542516
PPFIA2	5130.9	0.384863	0.142012	2.71007	0.00672687	0.0542651
CPED1	38.123	-4.86008	1.79369	-2.70955	0.00673754	0.0543178
RNF7	1056.52	0.688341	0.254118	2.70875	0.00675376	0.054394
MLEC	608.918	-0.410606	0.151589	-2.70867	0.00675527	0.054394
DIPK1C	263.907	-0.649224	0.239711	-2.70836	0.00676174	0.0544128
TMC7	187.784	-0.882409	0.325889	-2.70769	0.00677523	0.0544879
MERTK	32.8043	-1.64108	0.606664	-2.70509	0.00682861	0.0548836
NEDD1	526.453	-0.497435	0.184039	-2.70288	0.00687417	0.055216
CCDC126	553.795	0.572718	0.211947	2.70217	0.00688882	0.0552999
ENSGALG00000032836	278.069	0.716245	0.265085	2.70194	0.00689356	0.0553042
ZNF628	428.79	-0.664773	0.24614	-2.70079	0.00691742	0.0554618
ARHGEF17	104.173	-0.983069	0.364113	-2.6999	0.00693599	0.0555472
CCDC85C	156.063	-0.802903	0.297385	-2.69988	0.00693653	0.0555472
S1PR1	369.397	-0.528198	0.1957	-2.69902	0.00695438	0.0556562
NUCB2	2366.8	0.434944	0.161163	2.69879	0.00695918	0.0556607
RNF141	2231.5	0.410367	0.15208	2.69837	0.00696808	0.055669
UBE2V1	1258.5	0.466548	0.172902	2.69834	0.00696868	0.055669
NUF2	415.268	-0.514418	0.190673	-2.6979	0.00697775	0.0557075
HDAC11	669.395	0.534457	0.198166	2.69701	0.00699646	0.055823
AKAP11	2643.83	0.356613	0.132243	2.69665	0.00700409	0.0558402
ENSGALG00000053345	164.097	-0.918698	0.340699	-2.69651	0.00700712	0.0558402
FNIP2	2040.33	0.352588	0.130777	2.69609	0.00701584	0.055842
CRTAC1	89.0271	-1.11794	0.414633	-2.69623	0.00701296	0.055842
GRPR	383.33	0.530863	0.196935	2.69563	0.00702564	0.0558523
VEZF1	1552.77	-0.377248	0.139943	-2.69571	0.00702378	0.0558523
DACH2	975.523	-0.532445	0.197609	-2.69443	0.00705093	0.0560058
SNCA	195.814	1.06681	0.395948	2.69431	0.00705346	0.0560058
ENSGALG00000035017	84.1158	-0.921398	0.342437	-2.69071	0.00713008	0.0565799
KLHL35	983.583	-0.472445	0.175644	-2.68979	0.00714977	0.0566597
ENSGALG00000029674	327.461	-0.633438	0.235496	-2.68981	0.0071493	0.0566597
ENSGALG00000000295	207.635	-0.654413	0.243309	-2.68963	0.00715307	0.0566597
NUDT13	285.164	0.556938	0.207166	2.68837	0.00718018	0.0568012
LRTM1	288.181	0.932475	0.346877	2.6882	0.00718389	0.0568012
CAPZA1	4276.63	0.344233	0.128052	2.68823	0.00718311	0.0568012
ENSGALG00000053397	55.0031	-1.39421	0.518792	-2.68741	0.00720092	0.0568732
SCPEP1	847.28	0.464643	0.172898	2.68737	0.00720166	0.0568732
ENSGALG00000036908	50.4745	-1.29297	0.481223	-2.68684	0.00721311	0.0569294
ENSGALG00000054744	24.8577	2.09385	0.779458	2.68629	0.00722501	0.0569587
ENSGALG00000033792	325.257	-0.649195	0.241672	-2.68627	0.00722549	0.0569587
PARP9	654.816	0.497877	0.185355	2.68607	0.00722987	0.056959
ENSGALG00000051413	72.2853	1.42233	0.529599	2.68566	0.0072386	0.0569936
ENSGALG00000050268	31.03	1.69452	0.631159	2.68478	0.00725781	0.0571107
ENSGALG00000035769	343.934	-0.624736	0.232857	-2.68292	0.00729822	0.057377
GPER1	28.0295	-1.6922	0.6308	-2.68262	0.00730476	0.057377
RRAGC	1564.32	0.481137	0.179346	2.68273	0.0073024	0.057377
ENTPD4	511.108	0.623396	0.232456	2.68178	0.00732307	0.0574866
ENSGALG00000030552	607.575	0.57199	0.213321	2.68136	0.0073324	0.0575172
PPP2R5E	1193.26	0.523999	0.195434	2.68121	0.00733573	0.0575172
GRAMD2A	22.2615	-1.75182	0.653602	-2.68026	0.00735652	0.0576458
C2CD5	2080.95	0.374021	0.139614	2.67896	0.00738517	0.0578358
ENSGALG00000049136	861.301	-0.485583	0.18129	-2.67848	0.00739567	0.0578836
MIGA1	201.188	0.728883	0.272218	2.67757	0.00741586	0.058007
ZC3H3	447.144	-0.67689	0.252825	-2.6773	0.00742175	0.0580186
ENSGALG00000055014	49.5929	-1.34103	0.500992	-2.67675	0.00743397	0.0580796
ENSGALG00000036019	496.68	0.530657	0.198275	2.67637	0.00744246	0.0580998
MMAB	242.73	-0.729263	0.272496	-2.67624	0.0074454	0.0580998
ENSGALG00000033925	2075.07	0.409387	0.15299	2.6759	0.00745297	0.0581243
WDR4	805.476	0.420321	0.157154	2.67458	0.00748227	0.0582837
MAP3K13	823.78	0.450661	0.16849	2.6747	0.00747962	0.0582837
FOXN4	79.0897	-1.11272	0.416122	-2.67401	0.00749494	0.0583478
ECE1	248.902	-0.685762	0.256508	-2.67345	0.00750751	0.058411
KCNK3	472.584	-0.700243	0.262033	-2.67234	0.00753237	0.0585697
ENSGALG00000054456	672.398	0.45815	0.17147	2.67189	0.00754247	0.0586136
RRN3	1251.49	0.373295	0.139742	2.67132	0.00755538	0.0586793
ENSGALG00000047326	178.616	1.00943	0.377956	2.67076	0.00756807	0.058743
HIPK3	2189.2	0.435612	0.163177	2.66957	0.00759481	0.0589158
ENSGALG00000006864	61.3218	-1.54802	0.579981	-2.66909	0.00760564	0.058965
LCORL	1235.36	0.448304	0.168001	2.66846	0.00761999	0.0590067
AGAP1	1486.12	-0.3646	0.136627	-2.66858	0.0076173	0.0590067
HMMR	299.032	-0.706749	0.265036	-2.66662	0.00766183	0.0592608
ENSGALG00000053225	684.88	-0.641211	0.240454	-2.66666	0.00766085	0.0592608
NMRK2	211.81	-0.599077	0.224715	-2.66595	0.0076772	0.0593448
DRD1	178.786	0.799784	0.300028	2.6657	0.00768282	0.0593533
TM9SF2L	1562.02	0.446473	0.167532	2.665	0.00769889	0.0594076
MAN2B2	1563.28	0.393906	0.147798	2.66517	0.00769494	0.0594076
UBE2N	4002.75	0.363394	0.136402	2.66414	0.00771845	0.0594886
RASL11B	104.791	-1.14017	0.427954	-2.66424	0.00771614	0.0594886
FZD2	51.973	-1.45092	0.544853	-2.66296	0.00774572	0.0596638
ENSGALG00000032799	609.501	-0.513519	0.192858	-2.66267	0.00775227	0.0596793
gga-mir-218-1	548.263	0.604651	0.227177	2.66158	0.00777738	0.0598376
RABGAP1	3765.78	0.295723	0.111123	2.66123	0.00778554	0.0598653
KIFAP3	5424.98	0.298017	0.112006	2.66073	0.00779711	0.0599192
FAT1	4238.66	-0.39959	0.150294	-2.65872	0.00784384	0.0602431
ENSGALG00000052475	203.38	-0.843492	0.317289	-2.65844	0.00785038	0.0602581
ENSGALG00000040681	61.3173	1.14476	0.43088	2.65678	0.00788901	0.0604135
ENSGALG00000014963	46.7698	-1.71565	0.645728	-2.65692	0.00788578	0.0604135
C14orf2	850.1	0.538142	0.202539	2.65697	0.00788456	0.0604135
FUS	368.96	-0.664215	0.249982	-2.65705	0.00788283	0.0604135
NEK6	1350.43	-0.426605	0.160589	-2.6565	0.00789567	0.0604293
ENSGALG00000047573	220.445	-0.909528	0.342432	-2.65609	0.00790536	0.0604682
FN1	851.098	-1.71224	0.64483	-2.65533	0.00792298	0.0605677
TACC1	80.0725	-1.02227	0.385488	-2.65188	0.00800453	0.0611555
FRA10AC1	538.66	0.474288	0.178891	2.65126	0.00801912	0.0612314
PREP	2743.45	0.426954	0.161101	2.65023	0.00804378	0.061384
ENSGALG00000025811	378.875	0.678899	0.256216	2.64972	0.00805596	0.0614413
TRAPPC13	560.063	0.558753	0.210892	2.64947	0.00806181	0.0614502
ST3GAL2	171.725	-0.817484	0.308603	-2.64898	0.00807343	0.0615032
ACSS3	48.9157	-1.58017	0.597198	-2.64598	0.00814556	0.0619449
SLC35B3	882.83	0.49389	0.186654	2.64602	0.00814459	0.0619449
COPS3	1182.56	0.409028	0.154567	2.64628	0.00813816	0.0619449
CADM2	919.251	0.543597	0.205486	2.64542	0.00815901	0.0620113
LLGL1	78.8606	-1.02243	0.386733	-2.64376	0.0081991	0.06228
PDGFA	141.723	0.844293	0.319478	2.64273	0.00822417	0.0624343
TRIM35	60.4423	-1.13732	0.430647	-2.64095	0.00826734	0.0627258
ARF6	413.413	0.501364	0.189977	2.63907	0.00831337	0.0630386
EYA4	26.7307	-2.23896	0.848556	-2.63856	0.0083259	0.0630973
TCF24	114.316	1.00084	0.379352	2.63829	0.00833247	0.0631106
ENSGALG00000051385	22.4805	-2.2308	0.846109	-2.63654	0.00837562	0.0634009
TUBA3E	1026.97	-0.509878	0.193468	-2.63546	0.00840234	0.0635666
HTR1F	24.2515	1.83595	0.696695	2.63522	0.00840823	0.0635689
SSBP3	2475.14	-0.462724	0.175603	-2.63506	0.00841232	0.0635689
BAG5	1059.95	0.447163	0.169733	2.6345	0.0084261	0.0636364
CREBBP	4674.45	-0.349155	0.132562	-2.63389	0.00844132	0.0637147
ZDHHC16	68.1685	-1.11098	0.422014	-2.63257	0.00847405	0.0639251
PPP1R9A	1699.89	0.440229	0.167348	2.63062	0.00852285	0.0642563
MRPS35	335.665	0.627942	0.238858	2.62894	0.00856524	0.0643609
C1orf35	85.2834	-0.904416	0.34397	-2.62935	0.00855485	0.0643609
ENSGALG00000030350	45.6574	1.3861	0.527108	2.62964	0.00854758	0.0643609
CBFB	178.317	-0.718023	0.273072	-2.62943	0.00855288	0.0643609
NUDCD2	707.889	0.534212	0.203205	2.62893	0.0085653	0.0643609
CBX1	454.492	-0.779778	0.296618	-2.6289	0.00856611	0.0643609
ENSGALG00000048940	200.494	0.691861	0.263255	2.6281	0.00858627	0.0644755
CERS6	796.53	0.459021	0.174686	2.6277	0.00859646	0.0645152
CDK14	1756.82	0.367195	0.139794	2.62668	0.00862218	0.0645607
APBA1	982.96	0.436886	0.166305	2.62702	0.0086136	0.0645607
ENSGALG00000002193	625.998	-0.540188	0.205627	-2.62703	0.00861329	0.0645607
ZHX3	151.712	-0.856235	0.325974	-2.6267	0.00862186	0.0645607
7SK	1630.3	-1.62473	0.618658	-2.62621	0.0086342	0.0646139
LRP5	660.99	-0.516549	0.196792	-2.62485	0.00866877	0.0648357
SSRP1	647.473	-0.650228	0.247757	-2.62446	0.00867872	0.0648363
CCNJL	206.972	-0.705702	0.268878	-2.62462	0.00867461	0.0648363
RYR3	1295.26	0.529164	0.201717	2.6233	0.00870814	0.0650191
SLC6A1	1391.11	0.512995	0.195598	2.62271	0.00872345	0.0650888
CBLN3	193.151	0.776988	0.296272	2.62255	0.00872738	0.0650888
ENSGALG00000006565	46.9017	-1.9536	0.744982	-2.62234	0.00873277	0.0650921
TCF20	1616.39	-0.472836	0.180333	-2.62202	0.00874113	0.0651175
ENSGALG00000012121	132.829	-0.904254	0.345052	-2.62063	0.00877666	0.0653451
DEPDC6	134.194	0.944978	0.360665	2.62009	0.00879054	0.0653743
TTC7A	261.742	-0.612409	0.233719	-2.62027	0.00878591	0.0653743
RPS23	4365.11	-0.445744	0.170146	-2.61978	0.00879862	0.0653844
ENSGALG00000053185	76.9201	1.37715	0.5257	2.61966	0.00880184	0.0653844
ENSGALG00000017276	22.0175	2.24367	0.856803	2.61865	0.00882775	0.0655398
SCRN1	4109.27	0.36158	0.13811	2.61806	0.00884325	0.065587
ERBB4	895.368	0.505141	0.192947	2.61802	0.00884409	0.065587
ADAMTS3	649.883	-0.460527	0.175963	-2.61718	0.00886591	0.0656747
USP33	2152.44	0.377198	0.144116	2.61733	0.00886209	0.0656747
TTC31	50.4857	-1.36703	0.522529	-2.61619	0.00889181	0.065757
FER	978.352	0.518582	0.198221	2.61618	0.00889203	0.065757
INO80D	927.548	-0.462665	0.176827	-2.61649	0.00888381	0.065757
PPP3CB	1745.7	0.350668	0.13423	2.61244	0.00898983	0.0664428
RCHY1	458.4	-0.531464	0.203563	-2.61081	0.00903285	0.0666483
ENSGALG00000053905	22.7362	-2.13858	0.819109	-2.61086	0.00903138	0.0666483
EVI5	3464.36	0.445646	0.170678	2.61103	0.00902688	0.0666483
RAB1B	4388.8	0.400067	0.153287	2.60993	0.00905612	0.0667826
BARD1	78.3211	-1.07609	0.412341	-2.60971	0.00906181	0.066787
WASHC3	863.997	0.696133	0.266875	2.60847	0.00909493	0.0669691
QKI	2554.47	-0.386003	0.148006	-2.60803	0.00910647	0.0669691
C5H15orf57	2086.08	0.383263	0.146944	2.60823	0.00910113	0.0669691
SPHKAP	592.804	0.485169	0.18603	2.60801	0.0091069	0.0669691
MTX3	247.8	0.734849	0.281857	2.60717	0.00912952	0.0670437
ENSGALG00000030088	95.221	1.35654	0.520332	2.60706	0.00913234	0.0670437
ENSGALG00000051720	33.4383	-1.42055	0.544881	-2.60708	0.00913168	0.0670437
CACNA1D	5237.25	0.350116	0.134331	2.60636	0.0091509	0.0671423
SGF29	291.647	-0.635916	0.24404	-2.60579	0.00916638	0.0672184
ENSGALG00000050460	45.6787	-1.29754	0.498093	-2.60502	0.00918691	0.0673065
ISLR	39.0628	-1.80853	0.694267	-2.60495	0.00918864	0.0673065
WARS1	1046.24	0.433428	0.166402	2.6047	0.00919539	0.0673184
FRY	7875.8	0.391486	0.150316	2.60442	0.00920304	0.067337
KMT2C	10270.9	-0.294325	0.113035	-2.60383	0.00921875	0.0674144
ABCA1	1859.51	-0.621445	0.238686	-2.60361	0.00922487	0.0674216
ELK3	189.547	-0.769492	0.295623	-2.60295	0.00924242	0.0675123
SYN3	2896.62	0.301666	0.115927	2.6022	0.00926266	0.0676226
TMEM14A	479.296	0.637526	0.245035	2.60178	0.0092741	0.0676685
GNB4	1320.7	0.392302	0.150801	2.60145	0.00928313	0.0676968
ENSGALG00000050133	39.0494	-1.79944	0.691821	-2.60101	0.00929492	0.0677076
ENSGALG00000045185	226.17	-0.900562	0.34622	-2.60112	0.0092919	0.0677076
VSTM2A	448.098	1.42419	0.54779	2.59989	0.00932534	0.0678916
SLC35E1	1042.23	0.387855	0.149217	2.59928	0.00934203	0.0679754
PDCD4	1929.24	-0.383885	0.147702	-2.59906	0.00934807	0.0679817
ENSGALG00000049401	624.389	-0.553219	0.212891	-2.59861	0.00936029	0.0680329
ADIPOQ	28.1806	-1.69738	0.653257	-2.59834	0.00936766	0.0680488
CLMP	155.54	-1.074	0.413438	-2.59774	0.0093839	0.0681292
ENSGALG00000049176	1052.69	0.550193	0.211933	2.59607	0.00942979	0.0684234
SLC39A3	84.7609	1.16669	0.449439	2.59588	0.00943484	0.0684234
NEFM	6666.64	1.0537	0.406257	2.59367	0.00949571	0.0688269
MAPKAPK2	357.173	-0.716826	0.276406	-2.59338	0.00950373	0.068847
CCNC	1082.61	0.577738	0.22293	2.59156	0.00955418	0.0691014
LPP	369.997	-0.563014	0.21725	-2.59154	0.00955462	0.0691014
PITPNM3	506.366	0.523481	0.201984	2.5917	0.00955038	0.0691014
SSTR3	54.1525	-1.22018	0.4709	-2.59116	0.00956537	0.0691411
ENSGALG00000051809	29.6576	-1.97696	0.763127	-2.5906	0.00958086	0.0691562
CA4	178.811	0.843575	0.32564	2.59051	0.00958324	0.0691562
HSD11B1L	104.938	-0.847603	0.32719	-2.59056	0.00958212	0.0691562
USP48	761.905	-0.513109	0.198175	-2.58917	0.00962069	0.0693883
VASN	41.8353	-1.43888	0.555805	-2.58882	0.00963041	0.0694203
SGPL1	1396.88	-0.347142	0.134155	-2.58761	0.00966434	0.0696267
COX17	884.797	1.57328	0.608124	2.5871	0.00967868	0.0696918
C7orf73	648.344	0.519983	0.20103	2.5866	0.00969287	0.0697557
PGM2	650.103	0.481047	0.185992	2.58639	0.00969876	0.0697599
VIM	18102.3	0.358011	0.138482	2.58526	0.00973048	0.0699466
PLTP	64.2413	-1.19022	0.460416	-2.58509	0.00973535	0.0699466
ENSGALG00000030908	3620.36	0.464351	0.179702	2.58401	0.00976587	0.0700996
TMEM231	1078.41	0.594713	0.230156	2.58396	0.00976732	0.0700996
GSTK1	625.081	0.488696	0.189167	2.58342	0.0097827	0.0701611
SNRPGP15	570	-0.512914	0.198551	-2.58328	0.00978656	0.0701611
SMOX	75.0918	-0.955349	0.369962	-2.58229	0.00981475	0.0703247
FAM168A	462.506	-0.561555	0.217667	-2.57988	0.00988343	0.0706974
NAPG	1676.1	0.483894	0.187568	2.57983	0.00988478	0.0706974
ENSGALG00000053889	175.403	-0.697216	0.27026	-2.5798	0.00988573	0.0706974
CCNG1	1485.88	0.360665	0.139808	2.57971	0.00988827	0.0706974
SPEN	7356.63	-0.413162	0.160221	-2.57871	0.00991702	0.0708644
UPP1	267.146	0.625386	0.242542	2.57847	0.0099239	0.070875
ENSGALG00000001948	1935.76	-0.463049	0.179663	-2.57732	0.00995691	0.0710721
GLDC	1295.12	-0.418414	0.162359	-2.57709	0.00996351	0.0710806
DENND2A	534.852	-0.555994	0.215822	-2.57618	0.00999	0.071231
FZD7	108.124	-0.921596	0.357827	-2.57554	0.0100085	0.0713239
ENSGALG00000005076	306.053	0.673506	0.261536	2.57519	0.0100184	0.0713558
ENSGALG00000005180	620.018	-0.556565	0.216192	-2.57441	0.0100412	0.0714796
GGA1	332.933	-0.532188	0.206798	-2.57346	0.0100687	0.0715692
SERTM1	952.203	0.588089	0.228572	2.57288	0.0100855	0.0715692
DHRS7B	331.421	-0.509129	0.197836	-2.57348	0.0100681	0.0715692
BNIP3L	3608.05	0.390774	0.151874	2.57302	0.0100817	0.0715692
INTS3	309.612	-0.684078	0.265883	-2.57285	0.0100865	0.0715692
GATAD2B	496.816	-0.662345	0.257399	-2.57322	0.0100756	0.0715692
BCAP29	711.331	0.42986	0.16712	2.57216	0.0101067	0.0716517
VIPR2	24.0061	-2.27799	0.885661	-2.57208	0.010109	0.0716517
C9orf72	470.085	0.559279	0.217484	2.57159	0.0101234	0.071715
ENSGALG00000001111	28.3216	-1.92982	0.751091	-2.56936	0.0101887	0.0721388
UBE3C	2107.41	0.385895	0.150221	2.56884	0.0102039	0.0722079
SLC24A3	747.145	0.529411	0.206165	2.56789	0.0102319	0.0722571
MIR124-1	43.2919	1.58324	0.616525	2.56801	0.0102285	0.0722571
TMA16	179.631	-0.635356	0.247417	-2.56796	0.01023	0.0722571
LYRM7	130.628	1.12894	0.439666	2.56773	0.0102367	0.0722571
RAB7A	6334.78	0.328038	0.127757	2.56767	0.0102384	0.0722571
RALGPS2	3712.59	0.344894	0.134356	2.56701	0.010258	0.0723566
ENSGALG00000051944	46.9869	-1.32217	0.515174	-2.56645	0.0102745	0.0724237
ZNF462	12371.1	-0.37176	0.144861	-2.56632	0.0102785	0.0724237
ENSGALG00000050868	250.31	-0.618226	0.240925	-2.56605	0.0102864	0.0724406
ALDH1L2	1349.51	0.433277	0.168908	2.56516	0.0103129	0.0725877
PRADC1	73.3614	1.18887	0.463751	2.5636	0.0103592	0.0728747
SNIP1	341.135	-0.546568	0.21328	-2.56268	0.0103868	0.0730044
GOLGA7	2453.74	0.310517	0.121172	2.56261	0.0103887	0.0730044
ENSGALG00000040001	2201.46	0.43856	0.171263	2.56074	0.010445	0.0733609
CLCN1	309.012	0.72409	0.282814	2.5603	0.0104581	0.0734131
INSIG2	850.266	0.424203	0.16571	2.55991	0.0104698	0.0734565
SYDE2	20.7458	-2.06285	0.806246	-2.55859	0.0105097	0.073697
MINDY3	1290.59	0.393528	0.153843	2.55798	0.0105281	0.0737866
RABGGTB	4325.45	0.319712	0.124997	2.55777	0.0105346	0.0737924
NF2	707.072	-0.495307	0.193662	-2.55759	0.0105402	0.0737924
ENSGALG00000052319	45.1298	-1.2998	0.508395	-2.55667	0.0105678	0.0739467
ENSGALG00000049127	62.2909	1.44132	0.563818	2.55636	0.0105775	0.0739749
ADAMTS12	133.748	-1.97573	0.773518	-2.55421	0.010643	0.0743931
EPHA5	2682.04	-0.36714	0.143819	-2.55279	0.0106863	0.0746565
TMEM69	602.774	0.52234	0.204828	2.55014	0.0107681	0.0751877
CPQ	130.026	0.837587	0.328515	2.54961	0.0107842	0.0752172
ITM2A	2387.18	0.578881	0.227061	2.54944	0.0107895	0.0752172
NTN3	543.16	-0.509491	0.199821	-2.54973	0.0107805	0.0752172
DNAJC2	1384.94	0.453573	0.17798	2.54844	0.0108205	0.0753892
ENSGALG00000054182	1318.51	-0.346332	0.135918	-2.54809	0.0108314	0.0753892
NRG1	848.379	0.574188	0.225338	2.54812	0.0108307	0.0753892
BAHCC1	135.667	-0.777743	0.3053	-2.54747	0.0108507	0.0754842
SYAP1	496.523	0.553368	0.217266	2.54696	0.0108665	0.0755001
BLOC1S5	1164.94	0.377281	0.148127	2.54701	0.0108652	0.0755001
C14H16orf45	2541.01	0.324747	0.12751	2.54684	0.0108703	0.0755001
ENSGALG00000050046	49.7083	1.16485	0.45774	2.54478	0.0109348	0.0758572
LPCAT1	1587.3	0.418094	0.16429	2.54484	0.0109326	0.0758572
POFUT1	795.08	-0.57732	0.226877	-2.54464	0.010939	0.0758572
CASD1	1167.42	0.427603	0.168071	2.54418	0.0109536	0.0759182
CIB4	124.858	-0.803204	0.315783	-2.54353	0.0109738	0.0760181
ZFYVE1	2042.59	0.344014	0.135263	2.5433	0.0109812	0.0760298
HSPD1	6369.5	0.322588	0.126937	2.54133	0.0110433	0.0763386
ASPHD2	135.775	1.10349	0.434191	2.54148	0.0110384	0.0763386
QSOX2	1275.12	-0.374648	0.147402	-2.54167	0.0110324	0.0763386
ANKRD6	452.23	-0.556855	0.21914	-2.54109	0.0110508	0.0763504
DCLK1	5955.41	0.34061	0.134089	2.54017	0.0110799	0.0764513
VPS13C	3907.41	0.349556	0.137603	2.54033	0.0110748	0.0764513
ADA	51.4928	1.34862	0.530936	2.54008	0.0110829	0.0764513
OPTN	1439.1	0.4799	0.189047	2.53853	0.011132	0.0767501
PAFAH2	19.4903	-1.92724	0.75935	-2.53801	0.0111485	0.0768237
AP2M1	5833.62	0.298123	0.117638	2.53424	0.0112693	0.0776151
CABLES2	125.427	-0.805884	0.318153	-2.53301	0.0113089	0.0778083
DDX54	238.296	-0.644552	0.254462	-2.533	0.0113092	0.0778083
NSMCE3	627.852	-0.543458	0.214576	-2.53271	0.0113184	0.0778307
TCEANC	372.032	0.635967	0.251291	2.5308	0.0113803	0.0779302
CEP85L	373.039	-0.594998	0.23509	-2.53094	0.0113758	0.0779302
TMEM18	309.815	0.658039	0.259912	2.53178	0.0113485	0.0779302
SMIM18	2014.88	0.389269	0.153779	2.53135	0.0113625	0.0779302
RHOA	9237.05	0.367807	0.14528	2.5317	0.011351	0.0779302
GSPT2	1973.75	0.418532	0.165333	2.53144	0.0113594	0.0779302
CABP1	327.038	0.729533	0.2882	2.53135	0.0113625	0.0779302
TMBIM6	663.046	-0.591895	0.233858	-2.531	0.0113738	0.0779302
SLC6A2	84.2142	-1.011	0.39963	-2.52983	0.0114117	0.0781049
ENSGALG00000050178	133.315	-0.87074	0.344226	-2.52956	0.0114205	0.0781244
ENSGALG00000048872	43.1219	-1.47078	0.581533	-2.52914	0.0114341	0.0781767
ENSGALG00000048001	202.411	0.678492	0.268364	2.52825	0.0114633	0.0782945
GPR180	334.706	0.480931	0.190214	2.52837	0.0114594	0.0782945
GNG10	1939.92	0.480288	0.190105	2.52644	0.0115225	0.0786181
ARL6IP1	8634.36	0.428744	0.169703	2.52644	0.0115226	0.0786181
ENSGALG00000053163	88.6356	-0.895088	0.354478	-2.52509	0.0115668	0.078879
EVA1C	27.1771	-1.784	0.706921	-2.52362	0.0116153	0.0791684
DCAF17	248.944	0.802089	0.317889	2.52317	0.0116301	0.0792283
ARL14EP	1043.91	0.518714	0.20563	2.52256	0.0116505	0.079326
ENSGALG00000050673	218.882	0.564351	0.223792	2.52177	0.0116767	0.0794629
RAPGEF3	55.242	-1.08112	0.429229	-2.51876	0.0117769	0.0801036
ENSGALG00000044151	34.9393	-1.43536	0.569929	-2.51848	0.0117862	0.0801252
ITGB5	136.458	-1.12194	0.445576	-2.51795	0.011804	0.0802046
HERC2	12985.8	0.280233	0.111348	2.51672	0.0118453	0.0804022
DAB1	2688.16	0.298138	0.118461	2.51677	0.0118435	0.0804022
C5H15orf41	428.972	0.612182	0.243291	2.51625	0.0118611	0.0804679
ENSGALG00000046830	137.744	-0.797921	0.317195	-2.51556	0.0118845	0.0805849
ELF2	550.351	-0.433372	0.172291	-2.51535	0.0118914	0.0805902
gga-mir-1691	24.3232	-1.59535	0.634899	-2.51276	0.011979	0.081059
ARL5A	172.734	0.651588	0.259276	2.51311	0.0119673	0.081059
ZNF609	592.464	-0.488861	0.194537	-2.51294	0.0119729	0.081059
ENSGALG00000007833	433.943	-0.550025	0.218915	-2.5125	0.0119879	0.0810769
AGO1	8915.65	-0.324569	0.12923	-2.51156	0.0120198	0.0812509
ENSGALG00000005435	337.74	-1.41009	0.56148	-2.51138	0.012026	0.081251
CDCA3	142.842	-0.787866	0.313861	-2.51023	0.0120651	0.0812683
NHLH2	29.0136	-1.44566	0.575861	-2.51044	0.0120581	0.0812683
ARF1	23616.7	0.334138	0.133065	2.51109	0.012036	0.0812683
PDE5A	362.485	-0.564235	0.224775	-2.51022	0.0120656	0.0812683
ENSGALG00000046281	39.5579	1.56373	0.622947	2.51022	0.0120656	0.0812683
EIF3G	578.898	-0.666955	0.26567	-2.51046	0.0120573	0.0812683
CILK1	1848.89	0.414317	0.165075	2.50987	0.0120776	0.0813071
CCNA2	1019.48	-0.468535	0.186703	-2.50952	0.0120895	0.0813454
GRIN1	453.941	0.608757	0.242647	2.50882	0.0121136	0.0814659
SLC35E3	1145.7	0.469995	0.187474	2.50698	0.0121766	0.0815976
GIMD1	188.416	0.915653	0.365178	2.50742	0.0121617	0.0815976
TLE1	1661.95	0.38337	0.152896	2.5074	0.0121624	0.0815976
WDR89	188.89	0.674022	0.268858	2.50698	0.0121766	0.0815976
NCKAP5	3338.02	-0.338729	0.135105	-2.50715	0.012171	0.0815976
GPR149	777.769	0.371842	0.14831	2.50719	0.0121696	0.0815976
KLHL25	182.61	-0.697514	0.278157	-2.50763	0.0121544	0.0815976
PRDX1	12278.5	0.425217	0.169706	2.50561	0.012224	0.0818737
MSH6	1406.94	-0.36187	0.144461	-2.50496	0.0122464	0.0819401
SNX18	39.13	-1.43833	0.574158	-2.50512	0.012241	0.0819401
UBAC2	801.551	0.488983	0.195265	2.50421	0.0122726	0.0819483
SLC39A6	1391.03	0.457628	0.182737	2.5043	0.0122693	0.0819483
gga-mir-1575	48.5691	-1.28556	0.513337	-2.50432	0.0122687	0.0819483
ENSGALG00000051945	72.0506	1.12398	0.448784	2.5045	0.0122625	0.0819483
APMAP	2118.52	0.346556	0.1385	2.50221	0.0123422	0.0822876
GAREM2	44.6209	-1.28774	0.514611	-2.50236	0.012337	0.0822876
ENSGALG00000028530	2513.54	0.442384	0.176795	2.50225	0.0123408	0.0822876
CHMP5	1931.83	0.376622	0.150581	2.50113	0.0123797	0.0823289
ENSGALG00000047487	180.397	-0.833326	0.333097	-2.50175	0.012358	0.0823289
XPR1	8307.7	0.375886	0.150278	2.50126	0.0123752	0.0823289
D2HGDH	400.284	0.536298	0.214407	2.50131	0.0123734	0.0823289
ANTXR1	18.3758	-7.63963	3.05388	-2.50161	0.0123628	0.0823289
ENSGALG00000049430	32.1133	1.64592	0.658156	2.5008	0.0123913	0.0823645
TMEM196	71.1822	1.3125	0.524956	2.5002	0.0124123	0.082462
CETN3	593.363	0.634498	0.253817	2.49983	0.0124254	0.0824913
NUTF2	2087.34	0.312869	0.125162	2.49972	0.0124292	0.0824913
ABCE1	2502	0.457585	0.183173	2.49809	0.0124863	0.0828165
UBAP2L	1149.01	-0.45856	0.183573	-2.49797	0.0124909	0.0828165
TIPRL	1035.07	0.39783	0.159313	2.49717	0.0125189	0.0829609
SMARCC1	3855.78	-0.427062	0.171067	-2.49645	0.0125442	0.0830862
SRP68	977.362	-0.353294	0.141539	-2.4961	0.0125569	0.0831284
NIT2	334.359	0.609632	0.244288	2.49554	0.0125764	0.0831907
WIPF1	102.169	-0.824775	0.330529	-2.49532	0.0125843	0.0831907
PSMD4	721.986	-0.631565	0.253102	-2.49529	0.0125853	0.0831907
TVP23A	242.287	0.611918	0.24542	2.49335	0.0126545	0.0836062
ADCYAP1	323.911	-0.703469	0.282165	-2.49312	0.0126628	0.0836187
ELMO1	1730.78	0.456435	0.183134	2.49235	0.0126899	0.0837358
VXN	328.03	-0.715147	0.286947	-2.49226	0.0126932	0.0837358
WDR37	1757.53	0.3804	0.152712	2.49096	0.0127398	0.0839872
APCDD1	183.413	-1.91421	0.76883	-2.48977	0.0127825	0.0839872
ADGRG6	74.2436	-1.3385	0.537405	-2.49068	0.0127499	0.0839872
ENSGALG00000014902	870.484	0.470112	0.188806	2.48992	0.0127771	0.0839872
PLA2R1	58.5769	-1.52222	0.61119	-2.49059	0.0127533	0.0839872
PLCH1	837.805	-0.439649	0.176575	-2.48988	0.0127787	0.0839872
RBM39	2706.87	-0.289637	0.116326	-2.48986	0.0127792	0.0839872
[truncated: 11,194 more rows]
