# Supplementary material for: Little skate genome provides insights into genetic programs essential for limb-based locomotion
Source: eLife. 2022 Oct 26;11:e78345. doi: 10.7554/eLife.78345 (PMC9605692; doi:10.7554/eLife.78345)
Supplement: Supplementary file 3. — The percentile expression level and p-values of previous MN marker genes. [file elife-78345-supp3.xlsx]

## Sheet: Comparison
Gene	Percentile	log2FD	p.adj
aldh1a2	0.729364	-0.586031	0.931406
amigo1	0.887038	0.0213486	0.998022
epha4	0.822016	0.195574	0.983566
foxp1	0.973764	4.94673	7.22919e-05
id4	0.996445	1.69779	0.440929
irx5	0.919455	4.4609	0.0346948
isl1	0.924986	3.72496	0.0535108
isl2	0.787809	10.633	0.00023525
lhx1	0.802682	-0.119157	0.994233
LOC116977716 (Pappa2-like)	0.932492	4.78685	0.000165932
LOC116978643 (Slit3)	0.992052	2.5733	0.19284
LOC116983831 (Nrcam)	0.977575	1.49855	0.547393
LOC116990845 (Lhx3-like)	0.69109	0.759507	0.906623
lrp1b	0.949456	6.17583	0.000777923
mnx1 (HB9)	0.698248	2.74689	0.748237
ndnf	0.320301	-8.40682	0.00204126
nell2	0.989566	2.62474	0.0863614
ngfr	0.998536	6.4914	2.04337e-05
onecut1	0.3	#N/A	#N/A
pcdh19	0.78272	1.65055	0.619588
prph	0.984941	-0.270516	0.973977
ret	0.959518	2.80985	0.030086
slc18a3	0.93047	0.591444	0.93573
unc5c	0.702291	2.15358	0.718025
znf804a (Zfp804)	0.932701	3.45207	0.211324
