# Supplementary material for: Little skate genome provides insights into genetic programs essential for limb-based locomotion
Source: eLife. 2022 Oct 26;11:e78345. doi: 10.7554/eLife.78345 (PMC9605692; doi:10.7554/eLife.78345)
Supplement: Supplementary file 4. — The percentile expression of genes displayed in Figure 3. [file elife-78345-supp4.xlsx]

## Sheet: Multiple_rpBigTable_20220602
Gene Info		Per sample
Gene	Group	Skate_Pfin_MN_1	Skate_Pfin_MN_2	Skate_Pfin_MN_3	Skate_Tail_SC_1	Skate_Tail_SC_2	Skate_Tail_SC_3	Mouse_MN_1	Mouse_MN_2	Mouse_MN_3	Chick_Limb_MN_1	Chick_Limb_MN_2	Chick_Limb_MN_3	Chick_Limb_MN_4	Chick_Cerv_SC_1	Chick_Cerv_SC_2	Chick_Cerv_SC_3	Chick_Cerv_SC_4
Rpl37a	Common MN genes	0.816452	0.400389	0.95514	0.853529	0.836666	0.946817	0.739704	0.763269	0.874608	0.932403	0.89509	0.874757	0.88806	0.932728	0.947437	0.921912	0.93965
Aak1	Common MN genes	0.797643	0.851259	0.930386	0.828235	0.517782	0.590531	0.888336	0.877202	0.877851	0.85345	0.884923	0.868916	0.799805	0.886437	0.839498	0.829981	0.840796
Abi1	Common MN genes	0.971679	0.944114	0.855043	0.952978	0.923468	0.830505	0.893633	0.919576	0.928548	0.894116	0.871079	0.873242	0.857993	0.914774	0.900281	0.87573	0.879515
Abi2	Common MN genes	0.939574	0.671711	0.879797	0.845638	0.890715	0.970382	0.943033	0.950492	0.941628	0.7374	0.752542	0.803699	0.808133	0.814623	0.802509	0.860156	0.80013
Acbd3	Common MN genes	0.868879	0.744028	0.905632	0.746838	0.831153	0.428494	0.792887	0.715274	0.796887	0.783798	0.813217	0.772442	0.745403	0.818516	0.770171	0.7931	0.726044
Acly	Common MN genes	0.944438	0.936439	0.920873	0.964652	0.809642	0.864231	0.963355	0.970057	0.972219	0.954791	0.955008	0.958252	0.936838	0.970149	0.93965	0.963335	0.95133
Aco2	Common MN genes	0.958167	0.884985	0.948546	0.919576	0.834288	0.852773	0.856124	0.873203	0.85915	0.940407	0.958793	0.945598	0.941488	0.947437	0.942894	0.958252	0.946247
Acox1	Common MN genes	0.670522	0.92336	0.945952	0.935466	0.584585	0.935575	0.742947	0.810615	0.796454	0.785529	0.747891	0.648172	0.647848	0.809323	0.752542	0.709712	0.684188
Acsl3	Common MN genes	0.82683	0.767268	0.756783	0.789861	0.885742	0.646309	0.925413	0.931899	0.908983	0.830846	0.86989	0.866212	0.861237	0.879732	0.884166	0.844365	0.867727
Acsl4	Common MN genes	0.612366	0.76262	0.882932	0.651389	0.6542	0.434007	0.980543	0.981516	0.978813	0.913801	0.916721	0.85875	0.877352	0.899091	0.888817	0.88395	0.893576
Actb	Common MN genes	0.999784	0.999784	0.999892	1	1	0.999676	0.999568	0.999676	0.999676	0.999567	0.999784	0.999892	0.999784	0.999676	0.999784	0.999892	0.999784
Actr10	Common MN genes	0.666306	0.844341	0.656794	0.374014	0.394768	0.548049	0.849422	0.857313	0.857205	0.934999	0.937595	0.91499	0.916829	0.955981	0.902336	0.90504	0.926779
Actr1a	Common MN genes	0.929629	0.943141	0.950492	0.977624	0.931791	0.804886	0.913307	0.924333	0.892444	0.984858	0.981397	0.983344	0.981181	0.983452	0.983236	0.98302	0.983993
Acvr2a	Common MN genes	0.86088	0.68652	0.830181	0.875581	0.860123	0.918387	0.949519	0.969733	0.954059	0.922777	0.907636	0.919641	0.880056	0.926022	0.915207	0.914558	0.929267
Adam10	Common MN genes	0.765755	0.662523	0.907686	0.782942	0.630526	0.866501	0.885958	0.862285	0.788563	0.916396	0.92202	0.921804	0.940623	0.88157	0.907419	0.909258	0.908285
Adam23	Common MN genes	0.826397	0.953951	0.931575	0.903362	0.748135	0.617879	0.741541	0.770295	0.798616	0.811919	0.849989	0.820679	0.844906	0.744971	0.799913	0.71804	0.808241
Add1	Common MN genes	0.958707	0.9466	0.933196	0.976975	0.896876	0.770619	0.82456	0.843584	0.844882	0.888925	0.904067	0.902444	0.899632	0.896928	0.916504	0.891737	0.890655
Afap1	Common MN genes	0.869744	0.765971	0.884013	0.929197	0.769322	0.829856	0.904551	0.854935	0.90628	0.923535	0.904824	0.913152	0.894225	0.936513	0.91791	0.919208	0.92613
Afdn	Common MN genes	0.971787	0.974273	0.93525	0.938817	0.890282	0.865096	0.821209	0.791914	0.823587	0.932728	0.936729	0.930565	0.940082	0.951979	0.950573	0.945598	0.94841
Aff2	Common MN genes	0.721003	0.890715	0.766836	0.577883	0.805102	0.713977	0.881094	0.897741	0.873203	0.739239	0.738698	0.715445	0.729829	0.681376	0.758706	0.670236	0.740753
Agrn	Common MN genes	0.985191	0.95287	0.969841	0.987461	0.98011	0.973408	0.906821	0.916874	0.89439	0.902552	0.887952	0.87281	0.817759	0.943976	0.880813	0.898226	0.913801
Ak2	Common MN genes	0.576046	0.9546	0.683602	0.403524	0.321587	0.561561	0.782942	0.800022	0.83872	0.818083	0.759031	0.760004	0.651741	0.846961	0.821112	0.796344	0.793316
Akap11	Common MN genes	0.813101	0.710518	0.753432	0.699708	0.762512	0.80013	0.950168	0.958059	0.954275	0.782284	0.802077	0.833874	0.814298	0.742267	0.784555	0.768116	0.775146
Akap12	Common MN genes	0.95568	0.96195	0.968436	0.975678	0.974381	0.957842	0.973408	0.976543	0.971895	0.99297	0.988968	0.990158	0.986481	0.995566	0.992645	0.990374	0.990807
Akap6	Common MN genes	0.882067	0.833099	0.902821	0.725111	0.805535	0.703167	0.9466	0.954816	0.953951	0.958469	0.962362	0.965174	0.969608	0.946463	0.955116	0.959766	0.962146
Akap9	Common MN genes	0.796022	0.873203	0.847368	0.903038	0.763377	0.85234	0.920549	0.919792	0.907469	0.917478	0.877244	0.897253	0.889682	0.912827	0.903526	0.865131	0.899632
Akirin2	Common MN genes	0.917847	0.645552	0.820668	0.698951	0.58264	0.803373	0.96195	0.947141	0.964004	0.95425	0.9496	0.956522	0.950898	0.943868	0.955332	0.951006	0.960848
Aldh1a2	Common MN genes	0.721327	0.629229	0.776781	0.826289	0.776565	0.782834	0.997514	0.997514	0.998054	0.964742	0.977828	0.944084	0.914774	0.755678	0.723772	0.895198	0.771901
Aldh5a1	Common MN genes	0.815155	0.537347	0.86942	0.75981	0.831261	0.841747	0.802075	0.716787	0.858177	0.760004	0.799913	0.820463	0.831711	0.816569	0.853991	0.817975	0.825979
Amph	Common MN genes	0.557561	0.828451	0.909415	0.930062	0.946817	0.802184	0.794725	0.729435	0.689979	0.841337	0.83528	0.844906	0.833982	0.787692	0.743024	0.751893	0.788557
Ank	Common MN genes	0.675819	0.80921	0.652038	0.520592	0.293049	0.797535	0.821749	0.745757	0.785104	0.880273	0.914882	0.930348	0.901579	0.86697	0.898443	0.941596	0.898767
Ankrd10	Common MN genes	0.825749	0.800454	0.830397	0.653443	0.782402	0.773862	0.770295	0.78197	0.788455	0.982154	0.976747	0.975881	0.985615	0.978693	0.980424	0.970257	0.977396
Ankrd46	Common MN genes	0.817749	0.735056	0.720895	0.697006	0.919684	0.871581	0.759918	0.731921	0.721436	0.891304	0.903418	0.893792	0.914449	0.783474	0.872485	0.829332	0.855505
Ap1ar	Common MN genes	0.839044	0.886931	0.702843	0.803805	0.693763	0.639823	0.772349	0.860123	0.856988	0.886762	0.859074	0.880381	0.873134	0.802509	0.822842	0.770495	0.813
Ap1m1	Common MN genes	0.797319	0.864771	0.811047	0.735056	0.670522	0.839369	0.674305	0.78705	0.772457	0.924292	0.940731	0.94019	0.939866	0.8886	0.922994	0.93024	0.925589
Ap2m1	Common MN genes	0.980759	0.980867	0.994487	0.983029	0.943249	0.991352	0.739596	0.760026	0.73819	0.971663	0.978153	0.977396	0.974692	0.971339	0.970257	0.975341	0.972745
Ap3m1	Common MN genes	0.690304	0.953735	0.861853	0.771484	0.64339	0.682413	0.772565	0.798184	0.790617	0.942353	0.950898	0.95955	0.961821	0.930889	0.947112	0.956089	0.942245
Apba2	Common MN genes	0.856988	0.89212	0.943357	0.946168	0.876446	0.921414	0.853529	0.838828	0.900551	0.979883	0.976098	0.971988	0.975233	0.977179	0.971339	0.965607	0.972096
Aplp2	Common MN genes	0.940763	0.920225	0.964328	0.944763	0.905632	0.978813	0.938061	0.950384	0.915252	0.982046	0.982046	0.98064	0.980424	0.976422	0.976098	0.975124	0.979667
App	Common MN genes	0.998162	0.998811	0.998054	0.996109	0.997946	0.989839	0.973624	0.976219	0.968544	0.997404	0.997945	0.997621	0.998053	0.996864	0.995998	0.99416	0.996215
Appbp2	Common MN genes	0.847044	0.936223	0.737218	0.698411	0.659712	0.60988	0.948222	0.927467	0.921306	0.777309	0.798399	0.831711	0.823167	0.792775	0.809215	0.874324	0.831495
Arcn1	Common MN genes	0.918171	0.512485	0.723922	0.707059	0.589666	0.428494	0.837747	0.795698	0.80694	0.772334	0.738049	0.728856	0.748864	0.84231	0.798399	0.743997	0.79018
Arf1	Common MN genes	0.976543	0.939898	0.982488	0.980651	0.870392	0.972544	0.981191	0.986812	0.990596	0.997512	0.99827	0.99881	0.998918	0.995998	0.997512	0.99827	0.997404
Arhgap12	Common MN genes	0.671819	0.784996	0.707707	0.650524	0.633553	0.428494	0.843693	0.812885	0.857853	0.942245	0.925914	0.933701	0.928077	0.958793	0.940407	0.947978	0.953926
Arhgdia	Common MN genes	0.979786	0.985839	0.993406	0.989731	0.989731	0.989515	0.995784	0.996109	0.995676	0.947545	0.944625	0.937595	0.901255	0.961064	0.931538	0.933485	0.946571
Arhgef12	Common MN genes	0.775051	0.810183	0.808561	0.953951	0.813209	0.886066	0.809966	0.834504	0.813534	0.750162	0.745079	0.753299	0.760112	0.780446	0.766277	0.771469	0.781311
Arl1	Common MN genes	0.939142	0.846827	0.882175	0.649119	0.680575	0.753324	0.846395	0.904335	0.911685	0.883301	0.911854	0.884274	0.909583	0.862319	0.844365	0.906879	0.87865
Arl3	Common MN genes	0.866501	0.758404	0.88812	0.852232	0.950924	0.883148	0.779699	0.665982	0.691493	0.726152	0.720203	0.72745	0.694462	0.653796	0.636059	0.697274	0.699221
Arl6ip1	Common MN genes	0.669982	0.975678	0.947141	0.947573	0.717652	0.664901	0.931791	0.939034	0.947681	0.990482	0.995566	0.995782	0.995782	0.987562	0.990158	0.995025	0.993186
Arl6ip5	Common MN genes	0.850827	0.545455	0.767701	0.346449	0.305264	0.428494	0.965193	0.96595	0.966814	0.968743	0.943759	0.957279	0.967445	0.882327	0.937811	0.902769	0.929807
Arl8a	Common MN genes	0.883904	0.743811	0.711383	0.856124	0.585666	0.807696	0.969193	0.95968	0.971138	0.695544	0.788557	0.711767	0.665152	0.727233	0.57095	0.638222	0.626974
Armc1	Common MN genes	0.823911	0.932764	0.469463	0.589558	0.935358	0.992433	0.935791	0.903038	0.884121	0.896063	0.871188	0.872594	0.916288	0.825762	0.871188	0.814298	0.803266
Arpc1a	Common MN genes	0.970273	0.924873	0.961626	0.897957	0.980651	0.835261	0.920873	0.959788	0.945519	0.964309	0.966256	0.96485	0.967878	0.954467	0.944192	0.954575	0.965066
Arpc3	Common MN genes	0.939034	0.947898	0.942277	0.945087	0.86823	0.897633	0.933845	0.975894	0.952005	0.956414	0.953277	0.925373	0.939001	0.934134	0.925157	0.937811	0.932187
Arpc5	Common MN genes	0.944979	0.964328	0.743487	0.893417	0.756134	0.683386	0.982596	0.977948	0.987461	0.981506	0.985507	0.983236	0.984858	0.981938	0.980965	0.984209	0.980424
Arpp19	Common MN genes	0.648579	0.950059	0.806399	0.95914	0.577883	0.934602	0.965517	0.966058	0.971787	0.961929	0.968311	0.966364	0.975124	0.947653	0.96366	0.966472	0.960091
Asap1	Common MN genes	0.777754	0.803805	0.788455	0.762404	0.840017	0.883904	0.964869	0.963139	0.963896	0.911097	0.887627	0.885356	0.864266	0.874	0.865131	0.891521	0.870863
Asap2	Common MN genes	0.883364	0.580802	0.806507	0.85688	0.812777	0.680899	0.833207	0.846827	0.82683	0.838633	0.806511	0.759788	0.837227	0.766494	0.825005	0.825654	0.825546
Asxl3	Common MN genes	0.857205	0.900876	0.752783	0.870284	0.826181	0.858718	0.93298	0.924549	0.91655	0.863725	0.870539	0.866861	0.855613	0.843608	0.845771	0.846961	0.876595
Atad2b	Common MN genes	0.89666	0.91028	0.951897	0.895146	0.944438	0.836882	0.732678	0.788671	0.809858	0.858209	0.799048	0.842202	0.842743	0.862968	0.850638	0.842743	0.847934
Atcay	Common MN genes	0.909523	0.924008	0.914604	0.8972	0.796346	0.810075	0.778078	0.712572	0.763269	0.885788	0.886654	0.803158	0.790828	0.871404	0.806944	0.797642	0.840904
Atf2	Common MN genes	0.917739	0.682197	0.930278	0.629878	0.962166	0.782726	0.924008	0.928764	0.92617	0.776444	0.796128	0.847826	0.807917	0.774173	0.826087	0.84761	0.813865
Atf4	Common MN genes	0.930386	0.912982	0.893201	0.899795	0.515296	0.60534	0.871473	0.886283	0.879256	0.981181	0.975124	0.97599	0.971123	0.988211	0.986805	0.9801	0.982912
Atg3	Common MN genes	0.727597	0.858177	0.813209	0.677116	0.434115	0.764134	0.826721	0.853854	0.807696	0.913043	0.888925	0.880921	0.848583	0.910448	0.920614	0.791153	0.892494
Atox1	Common MN genes	0.983894	0.981299	0.965409	0.728029	0.420711	0.513242	0.901416	0.795157	0.873311	0.826736	0.861562	0.822302	0.776985	0.77785	0.855072	0.802077	0.859399
Atp1b1	Common MN genes	0.924981	0.906929	0.870717	0.951032	0.885958	0.821965	0.989082	0.992649	0.98919	0.912178	0.943651	0.910231	0.908825	0.749405	0.836362	0.865672	0.860697
Atp5b	Common MN genes	0.98692	0.984542	0.978705	0.992649	0.987569	0.994919	0.993947	0.993622	0.989407	0.971014	0.972853	0.969933	0.952953	0.97772	0.971231	0.974908	0.975016
Atp5c1	Common MN genes	0.968652	0.926927	0.905524	0.976435	0.958167	0.991136	0.991568	0.99319	0.994919	0.972637	0.970582	0.977936	0.970366	0.97188	0.973286	0.974692	0.974367
Atp5d	Common MN genes	0.953086	0.763917	0.889958	0.966166	0.934494	0.88812	0.927035	0.94433	0.941304	0.945382	0.908717	0.844257	0.698248	0.941596	0.946355	0.838741	0.95955
Atp5g3	Common MN genes	0.985407	0.976003	0.994595	0.979029	0.94152	0.428494	0.997622	0.997298	0.997189	0.969717	0.961064	0.959117	0.954683	0.964201	0.966796	0.969608	0.969176
Atp5k	Common MN genes	0.738623	0.707707	0.839801	0.753324	0.948222	0.428494	0.961301	0.984542	0.98865	0.993943	0.989942	0.989509	0.992862	0.992321	0.988319	0.993294	0.995133
Atp5pb	Common MN genes	0.974597	0.960004	0.935791	0.942817	0.611934	0.668793	0.981299	0.973841	0.977732	0.937378	0.95371	0.943111	0.934458	0.949167	0.950898	0.966688	0.95663
Atp5h	Common MN genes	0.965301	0.98692	0.624797	0.976327	0.981732	0.978597	0.849205	0.870392	0.872987	0.927536	0.933377	0.942894	0.917045	0.935756	0.930673	0.943002	0.95079
Atp5j	Common MN genes	0.969301	0.81202	0.429575	0.521349	0.91201	0.92109	0.978165	0.961301	0.926494	0.963011	0.970366	0.966472	0.965823	0.952628	0.963768	0.961605	0.967445
Atp6v0d1	Common MN genes	0.830613	0.669765	0.68598	0.52243	0.535077	0.698627	0.982921	0.984002	0.967679	0.862427	0.885248	0.850963	0.753839	0.862535	0.806619	0.858642	0.844798
Atp6v0e2	Common MN genes	0.936007	0.980543	0.841206	0.689547	0.987028	0.564912	0.894498	0.893093	0.863042	0.878434	0.86167	0.815488	0.801211	0.832252	0.8183	0.824573	0.880921
Atp6v1c1	Common MN genes	0.81829	0.716463	0.803913	0.825316	0.832126	0.584585	0.82683	0.828127	0.824992	0.864915	0.887735	0.770712	0.862968	0.712957	0.773632	0.713606	0.794614
Atp6v1d	Common MN genes	0.799157	0.946492	0.959896	0.513674	0.57864	0.428494	0.917414	0.903254	0.883256	0.967337	0.969392	0.962578	0.970474	0.953169	0.96247	0.947437	0.956305
Atrx	Common MN genes	0.847584	0.925197	0.960545	0.964869	0.91482	0.937628	0.921306	0.900227	0.903362	0.966905	0.954899	0.964417	0.967121	0.959658	0.96658	0.954683	0.961281
Atxn2	Common MN genes	0.967463	0.778619	0.955789	0.890282	0.927251	0.95741	0.782726	0.834937	0.809318	0.956738	0.950681	0.958036	0.951006	0.966148	0.965931	0.958901	0.961389
Azin1	Common MN genes	0.946276	0.554859	0.9239	0.776889	0.84499	0.859258	0.945952	0.929845	0.95114	0.967445	0.962903	0.954683	0.960415	0.969284	0.962146	0.957711	0.963984
B3gat1	Common MN genes	0.705978	0.624473	0.933521	0.65701	0.732137	0.856988	0.844882	0.762836	0.830181	0.835605	0.789855	0.84231	0.750703	0.89098	0.77958	0.844257	0.800022
Bach2	Common MN genes	0.923792	0.78705	0.639931	0.866285	0.816128	0.596368	0.843368	0.834612	0.853529	0.865996	0.870647	0.827277	0.82003	0.831278	0.783041	0.828575	0.812459
Baz2b	Common MN genes	0.832883	0.843044	0.912658	0.832667	0.796563	0.914171	0.86769	0.886066	0.839153	0.930456	0.915315	0.941056	0.933809	0.952304	0.945382	0.945057	0.949816
Bclaf1	Common MN genes	0.901848	0.85007	0.975246	0.943141	0.889201	0.781753	0.928981	0.924116	0.928224	0.969825	0.943976	0.960415	0.957387	0.974367	0.972204	0.96366	0.971447
Bclaf3	Common MN genes	0.767809	0.595503	0.743595	0.73311	0.713761	0.83364	0.786077	0.777862	0.768998	0.699221	0.708631	0.72799	0.756652	0.671858	0.701925	0.719014	0.674238
Bicd2	Common MN genes	0.78197	0.746514	0.626094	0.882067	0.913307	0.898822	0.736785	0.739704	0.629229	0.848691	0.843716	0.835821	0.861778	0.806835	0.82533	0.780229	0.826195
Bin1	Common MN genes	0.664685	0.882715	0.608042	0.784996	0.708032	0.536483	0.82056	0.838504	0.8478	0.925373	0.923751	0.92321	0.94138	0.923643	0.929916	0.921371	0.923643
Birc6	Common MN genes	0.874284	0.828019	0.738839	0.845422	0.805859	0.835585	0.888012	0.87904	0.868879	0.852152	0.864915	0.89509	0.878001	0.864157	0.882327	0.907419	0.89509
Blmh	Common MN genes	0.893309	0.78932	0.838072	0.685764	0.258783	0.917631	0.863258	0.877743	0.904443	0.930997	0.90212	0.903201	0.862535	0.935648	0.914774	0.854207	0.918343
Bmpr2	Common MN genes	0.932115	0.820019	0.899146	0.929737	0.931143	0.809426	0.97503	0.968652	0.969517	0.944733	0.942894	0.943759	0.946788	0.953602	0.943111	0.949167	0.956738
Bnip3l	Common MN genes	0.942493	0.622743	0.606961	0.927467	0.79559	0.940331	0.873311	0.776889	0.886066	0.945274	0.910664	0.913692	0.93965	0.91207	0.924508	0.891196	0.909042
Impad1	Common MN genes	0.789969	0.825749	0.53324	0.644147	0.425251	0.546211	0.94606	0.932007	0.927467	0.784988	0.752433	0.809972	0.760978	0.776876	0.753191	0.79018	0.760112
Brd2	Common MN genes	0.815371	0.974165	0.849746	0.816452	0.972868	0.931359	0.907469	0.909739	0.907361	0.82533	0.761735	0.701817	0.617564	0.853558	0.7626	0.771252	0.810621
Brd3	Common MN genes	0.686088	0.842395	0.869744	0.794293	0.827046	0.863258	0.792347	0.801967	0.776889	0.879191	0.783041	0.869998	0.793857	0.916396	0.872377	0.860697	0.880597
Brd7	Common MN genes	0.910712	0.852016	0.940223	0.96141	0.933953	0.545887	0.762728	0.726624	0.779159	0.832035	0.842526	0.8687	0.823924	0.882436	0.879299	0.892819	0.855072
Brinp1	Common MN genes	0.760242	0.74046	0.969733	0.960004	0.966382	0.893849	0.832559	0.685656	0.690196	0.858533	0.869024	0.877352	0.833333	0.847502	0.855938	0.785421	0.866212
Btf3	Common MN genes	0.767701	0.896011	0.920982	0.875905	0.91082	0.824451	0.754081	0.80067	0.777754	0.979667	0.949384	0.943868	0.967013	0.975557	0.975557	0.954034	0.985615
Bud31	Common MN genes	0.991136	0.90347	0.998162	0.976111	0.984218	0.428494	0.819155	0.70814	0.721976	0.938244	0.898767	0.922561	0.920722	0.949492	0.921588	0.94549	0.932511
Bzw1	Common MN genes	0.743595	0.728246	0.636904	0.750946	0.785645	0.716679	0.984002	0.982272	0.984542	0.990807	0.992537	0.991456	0.990374	0.992213	0.990482	0.992537	0.990158
Bzw2	Common MN genes	0.902713	0.81602	0.843909	0.84553	0.68144	0.896444	0.815263	0.864015	0.857529	0.983993	0.982154	0.980532	0.982371	0.981289	0.985291	0.98064	0.984966
9530068E07Rik	Common MN genes	0.860664	0.855583	0.881743	0.925738	0.930278	0.833532	0.895146	0.900984	0.842179	0.928293	0.937811	0.940299	0.952736	0.933377	0.922777	0.936513	0.928618
1810013L24Rik	Common MN genes	0.86542	0.582856	0.947249	0.769647	0.632148	0.935358	0.938169	0.895471	0.931467	0.952844	0.937486	0.914666	0.926347	0.959009	0.938892	0.928293	0.940731
5730455P16Rik	Common MN genes	0.726192	0.937412	0.496163	0.789969	0.967787	0.552697	0.844665	0.873419	0.842395	0.763033	0.748215	0.79018	0.875297	0.689163	0.823275	0.808241	0.746701
4930402H24Rik	Common MN genes	0.838936	0.89666	0.84045	0.908226	0.860448	0.762728	0.775159	0.802616	0.819803	0.985075	0.985832	0.989725	0.986805	0.992105	0.992213	0.993619	0.990482
Rtraf	Common MN genes	0.947249	0.986488	0.973733	0.8024	0.919252	0.957302	0.920765	0.870176	0.855583	0.963444	0.975773	0.974908	0.965607	0.964633	0.969933	0.976206	0.973286
1810058I24Rik	Common MN genes	0.950276	0.83872	0.948438	0.839044	0.735056	0.978381	0.765539	0.796238	0.735596	0.942786	0.959117	0.929159	0.93435	0.877785	0.938568	0.905689	0.934783
Cab39	Common MN genes	0.85861	0.679386	0.950168	0.863799	0.9733	0.942817	0.94433	0.940223	0.929629	0.94841	0.927644	0.93316	0.959334	0.892386	0.931105	0.914341	0.903201
Cacng2	Common MN genes	0.926062	0.938385	0.958923	0.868122	0.764242	0.625986	0.841423	0.839585	0.874716	0.829656	0.910556	0.791261	0.803158	0.690677	0.714796	0.793316	0.772334
Cacng4	Common MN genes	0.961626	0.839153	0.765539	0.971571	0.956329	0.559615	0.947898	0.952438	0.900443	0.786827	0.849773	0.755029	0.766277	0.76963	0.738482	0.705711	0.790396
Cadm1	Common MN genes	0.79386	0.963896	0.927467	0.912982	0.872446	0.895146	0.85407	0.853637	0.888012	0.951222	0.940082	0.925481	0.930132	0.959117	0.947329	0.942029	0.963011
Calr	Common MN genes	0.965193	0.991136	0.88531	0.989515	0.985839	0.909848	0.971246	0.971679	0.965517	0.771361	0.846745	0.7626	0.826411	0.891304	0.844473	0.835713	0.857776
Caml	Common MN genes	0.851908	0.914604	0.857205	0.918495	0.763053	0.848125	0.877202	0.907361	0.924008	0.711443	0.846096	0.830413	0.779364	0.751785	0.726368	0.76379	0.697058
Camsap1	Common MN genes	0.780456	0.875257	0.698843	0.883148	0.853746	0.611393	0.825316	0.828775	0.789536	0.94019	0.929375	0.927104	0.930889	0.936946	0.920939	0.931322	0.93024
Camsap2	Common MN genes	0.811047	0.945627	0.826073	0.83418	0.819479	0.812561	0.983245	0.979894	0.972544	0.955873	0.948735	0.955981	0.953818	0.940082	0.941056	0.949708	0.948518
Canx	Common MN genes	0.857961	0.920657	0.853097	0.72684	0.857853	0.594206	0.984867	0.986704	0.983245	0.968094	0.967121	0.967445	0.962362	0.967229	0.971663	0.971447	0.968743
Caprin1	Common MN genes	0.98011	0.926062	0.940763	0.9506	0.973192	0.91709	0.983029	0.983029	0.97784	0.984426	0.982587	0.985183	0.983128	0.987238	0.988103	0.985075	0.985291
Capza2	Common MN genes	0.73711	0.730732	0.881094	0.874608	0.677765	0.545995	0.948762	0.931143	0.94606	0.823275	0.911421	0.901904	0.878326	0.810404	0.886978	0.891088	0.863509
Capzb	Common MN genes	0.758404	0.947789	0.89666	0.864447	0.815047	0.428494	0.911037	0.881526	0.924116	0.88395	0.934999	0.926995	0.897577	0.863509	0.890439	0.930132	0.890006
Cask	Common MN genes	0.913415	0.745109	0.530429	0.897525	0.739055	0.84045	0.892552	0.885958	0.848233	0.961497	0.961497	0.966148	0.969392	0.955873	0.966364	0.956197	0.96777
Ccdc47	Common MN genes	0.858177	0.833423	0.75754	0.711491	0.655713	0.890066	0.84953	0.788888	0.830397	0.863509	0.830305	0.811702	0.812027	0.833658	0.847393	0.852909	0.841012
Ccdc6	Common MN genes	0.921414	0.958599	0.866717	0.854827	0.438655	0.986488	0.811047	0.85688	0.808994	0.706143	0.74032	0.701493	0.775579	0.663746	0.734155	0.638763	0.691759
Ccdc88a	Common MN genes	0.825208	0.882932	0.699708	0.880337	0.8785	0.851259	0.982164	0.981732	0.982921	0.975124	0.964093	0.970149	0.97653	0.965499	0.970798	0.955873	0.96539
Ccng2	Common MN genes	0.786942	0.717868	0.735812	0.823262	0.541995	0.727813	0.803697	0.842287	0.780456	0.971447	0.955548	0.955224	0.959117	0.960199	0.963119	0.926455	0.945706
Ccni	Common MN genes	0.831694	0.88531	0.735704	0.631824	0.775592	0.764026	0.874824	0.857205	0.769106	0.983452	0.984209	0.982154	0.982263	0.980965	0.984101	0.982587	0.986805
Ccnk	Common MN genes	0.731164	0.854178	0.945844	0.832451	0.608259	0.52643	0.832775	0.751919	0.716787	0.872594	0.806727	0.845447	0.866645	0.736535	0.819706	0.78196	0.757841
Ccnl2	Common MN genes	0.683818	0.637661	0.981299	0.715274	0.602421	0.705762	0.833748	0.857097	0.798508	0.858101	0.81592	0.812459	0.792343	0.875838	0.857452	0.835496	0.864482
Ccp110	Common MN genes	0.835802	0.625662	0.925089	0.95114	0.838612	0.952113	0.733759	0.745541	0.758621	0.884058	0.890439	0.854424	0.828899	0.856478	0.888168	0.834415	0.857668
Ccser2	Common MN genes	0.860988	0.952438	0.819803	0.654632	0.642201	0.680035	0.961842	0.953627	0.966274	0.850314	0.844798	0.864266	0.862751	0.817002	0.791369	0.821544	0.848583
Cct2	Common MN genes	0.966598	0.949087	0.971138	0.976759	0.96595	0.900767	0.99092	0.994271	0.992758	0.96485	0.968851	0.972204	0.973069	0.972961	0.973718	0.972745	0.9748
Cct4	Common MN genes	0.99092	0.976327	0.993947	0.97784	0.980543	0.701438	0.971463	0.96649	0.962058	0.921047	0.91499	0.905256	0.910448	0.931862	0.934134	0.934134	0.938244
Cct5	Common MN genes	0.980435	0.984975	0.954167	0.986812	0.973733	0.917522	0.987137	0.990596	0.991352	0.986481	0.984642	0.985291	0.980208	0.98713	0.982695	0.985832	0.984101
Cct6a	Common MN genes	0.994703	0.996325	0.995892	0.994055	0.99319	0.995244	0.989515	0.986164	0.987353	0.985615	0.986589	0.984966	0.984209	0.987346	0.987454	0.986372	0.984534
Cct7	Common MN genes	0.708032	0.71322	0.803156	0.788563	0.851151	0.784456	0.864339	0.876878	0.859258	0.973069	0.972745	0.975665	0.95371	0.983236	0.975665	0.976639	0.97772
Cct8	Common MN genes	0.968328	0.97784	0.960329	0.937736	0.960653	0.897957	0.977516	0.976975	0.973841	0.974259	0.982912	0.983993	0.979342	0.978045	0.982154	0.983344	0.979991
Cd81	Common MN genes	0.982272	0.967139	0.984867	0.961085	0.973084	0.983245	0.981407	0.981191	0.980543	0.869782	0.883085	0.929483	0.938135	0.893684	0.8939	0.944841	0.918992
Cd99l2	Common MN genes	0.975786	0.970598	0.981624	0.965517	0.967247	0.925954	0.939898	0.9239	0.924441	0.784015	0.778823	0.78607	0.772442	0.72745	0.698897	0.764763	0.751136
Cdc123	Common MN genes	0.472165	0.908118	0.860448	0.712572	0.964328	0.428494	0.880229	0.933629	0.933088	0.896171	0.920074	0.89682	0.948735	0.902012	0.915856	0.932295	0.936729
Cdc27	Common MN genes	0.545346	0.875041	0.798724	0.952005	0.665874	0.929737	0.972111	0.950924	0.949519	0.840039	0.881679	0.869457	0.84231	0.87454	0.850205	0.879191	0.854099
Cdk11b	Common MN genes	0.555508	0.797752	0.896336	0.945952	0.971787	0.888444	0.743055	0.815479	0.809102	0.775795	0.751785	0.767791	0.719879	0.857344	0.799048	0.784231	0.7626
Cdc42	Common MN genes	0.939466	0.923792	0.956221	0.94433	0.85007	0.842179	0.997081	0.996649	0.996973	0.986697	0.988536	0.986264	0.990591	0.977936	0.98183	0.984101	0.982695
Cdh11	Common MN genes	0.756243	0.792995	0.829424	0.950384	0.680683	0.428494	0.723057	0.736245	0.831153	0.843392	0.838741	0.844149	0.885897	0.743997	0.935323	0.743781	0.810945
Cep170	Common MN genes	0.669549	0.806724	0.90855	0.89212	0.8518	0.921198	0.956761	0.954491	0.956329	0.958793	0.95544	0.959766	0.947978	0.957387	0.956954	0.95371	0.955548
Cfap36	Common MN genes	0.587612	0.8518	0.915685	0.925305	0.779267	0.588909	0.898173	0.918711	0.931575	0.893035	0.880056	0.878542	0.885788	0.868916	0.874757	0.837984	0.875946
Cfl2	Common MN genes	0.956329	0.852448	0.92844	0.895579	0.90347	0.826073	0.996757	0.996433	0.996109	0.991564	0.987887	0.99297	0.989942	0.98767	0.988644	0.989401	0.989401
Chchd3	Common MN genes	0.739812	0.939466	0.828883	0.971895	0.39293	0.666847	0.816452	0.843693	0.74392	0.830413	0.819706	0.844041	0.871728	0.900389	0.901904	0.904824	0.893467
Chfr	Common MN genes	0.804778	0.738731	0.781321	0.553562	0.852016	0.898065	0.850286	0.84272	0.775808	0.752758	0.72096	0.725827	0.784772	0.729505	0.731668	0.6817	0.715985
Chga	Common MN genes	0.992649	0.990704	0.980218	0.989839	0.798292	0.428494	0.904443	0.91428	0.914496	0.886329	0.782068	0.778823	0.685161	0.922128	0.854856	0.80013	0.876055
Chmp2b	Common MN genes	0.626094	0.937628	0.923792	0.547292	0.89893	0.959356	0.84726	0.908442	0.843801	0.702358	0.648605	0.693489	0.828791	0.74324	0.819165	0.694354	0.729505
Chmp4b	Common MN genes	0.951032	0.61615	0.537888	0.911577	0.740244	0.756999	0.895471	0.891579	0.818074	0.959658	0.935432	0.939758	0.944841	0.860805	0.927212	0.758382	0.901471
Chmp5	Common MN genes	0.933413	0.985299	0.437682	0.884121	0.739596	0.931791	0.933737	0.923143	0.962815	0.952304	0.945598	0.945165	0.958144	0.932836	0.948086	0.915531	0.950898
Chn1	Common MN genes	0.669117	0.864988	0.752243	0.860339	0.862501	0.889634	0.775051	0.785861	0.808669	0.899308	0.835064	0.831819	0.874757	0.918019	0.924724	0.922886	0.945382
Chp1	Common MN genes	0.864231	0.922495	0.961085	0.963355	0.729002	0.600476	0.884337	0.828667	0.890606	0.919641	0.934458	0.908609	0.914341	0.886546	0.889682	0.836902	0.883085
Ciao2b	Common MN genes	0.969841	0.988326	0.320506	0.872122	0.900011	0.951465	0.778619	0.754297	0.822938	0.823383	0.82295	0.717067	0.805105	0.773524	0.799589	0.753082	0.8382
Cilk1	Common MN genes	0.800454	0.932115	0.694844	0.760566	0.747919	0.687277	0.914604	0.907253	0.91936	0.761951	0.824897	0.855505	0.740428	0.766385	0.737292	0.741618	0.748756
Cisd1	Common MN genes	0.979137	0.948546	0.917631	0.974489	0.985407	0.516701	0.905956	0.955356	0.930386	0.950681	0.960415	0.954359	0.955332	0.930456	0.948518	0.957279	0.922669
Ckap5	Common MN genes	0.84099	0.681224	0.814615	0.727273	0.884877	0.829424	0.96141	0.947357	0.958923	0.914017	0.906879	0.927861	0.918884	0.925914	0.925914	0.919749	0.915964
Ckb	Common MN genes	0.611285	0.827694	0.86369	0.902713	0.950708	0.799157	0.949303	0.955572	0.952654	0.981397	0.983236	0.987021	0.983993	0.988644	0.987778	0.992754	0.986481
Clint1	Common MN genes	0.677116	0.774727	0.960004	0.733867	0.792131	0.428494	0.848449	0.730948	0.782618	0.831927	0.758058	0.828034	0.818192	0.800238	0.807701	0.771793	0.809972
Clip1	Common MN genes	0.905416	0.917955	0.910388	0.835261	0.929197	0.864879	0.812453	0.788239	0.829964	0.858317	0.835821	0.809107	0.830197	0.869673	0.843284	0.845663	0.859831
Clns1a	Common MN genes	0.940331	0.982164	0.975894	0.810291	0.972652	0.867258	0.8291	0.849097	0.88304	0.979775	0.977396	0.980748	0.977396	0.982587	0.982046	0.979342	0.97891
Clta	Common MN genes	0.935466	0.969625	0.694087	0.983677	0.930494	0.842612	0.961626	0.938926	0.953302	0.965066	0.91618	0.927969	0.952628	0.964309	0.931862	0.961497	0.965715
Clvs2	Common MN genes	0.877851	0.893309	0.863474	0.825857	0.892444	0.700357	0.673981	0.757324	0.715706	0.914774	0.92613	0.902985	0.911205	0.922994	0.936946	0.939541	0.932728
Cmip	Common MN genes	0.802508	0.85634	0.966706	0.796454	0.702194	0.595611	0.938385	0.904551	0.891579	0.942029	0.94019	0.913801	0.902661	0.943219	0.92202	0.911421	0.930565
Cnih1	Common MN genes	0.743487	0.643066	0.832018	0.435088	0.384607	0.428494	0.969949	0.979354	0.973949	0.92732	0.968743	0.95425	0.953602	0.906662	0.942462	0.961389	0.946139
Cnn3	Common MN genes	0.988001	0.99373	0.97784	0.992325	0.974273	0.978705	0.940547	0.934385	0.886391	0.95836	0.960307	0.950573	0.944949	0.967121	0.97361	0.960199	0.955981
Cnot1	Common MN genes	0.776024	0.763161	0.816993	0.940115	0.937088	0.917955	0.835045	0.831153	0.819911	0.81949	0.853991	0.887303	0.84058	0.874648	0.865347	0.899416	0.879948
Cnot2	Common MN genes	0.890823	0.918279	0.951789	0.617879	0.589558	0.79786	0.762512	0.7717	0.784564	0.763465	0.760437	0.770604	0.807701	0.821761	0.813217	0.791261	0.784988
Cnot4	Common MN genes	0.887364	0.825424	0.908659	0.917847	0.949303	0.803156	0.772241	0.781213	0.763917	0.735669	0.636924	0.738698	0.721934	0.735561	0.716742	0.720203	0.717067
Cnr1	Common MN genes	0.936872	0.927683	0.818182	0.544157	0.810939	0.90347	0.787158	0.837207	0.842504	0.811811	0.761302	0.886654	0.846961	0.679862	0.731235	0.679429	0.752217
Cnrip1	Common MN genes	0.880553	0.833315	0.782834	0.979137	0.98865	0.965842	0.835693	0.779051	0.762188	0.822193	0.819057	0.736427	0.924616	0.472853	0.715012	0.606641	0.653796
Cntn1	Common MN genes	0.976327	0.886499	0.961842	0.920009	0.76716	0.857529	0.947789	0.941087	0.946384	0.775362	0.830521	0.757841	0.87984	0.547804	0.641683	0.635734	0.658122
Copa	Common MN genes	0.89266	0.921306	0.8972	0.917414	0.858934	0.673873	0.885634	0.905524	0.897416	0.851179	0.891413	0.868808	0.850422	0.913043	0.876703	0.895306	0.898659
Copb1	Common MN genes	0.960437	0.948222	0.899254	0.885634	0.886499	0.925738	0.929845	0.910712	0.912442	0.844365	0.855721	0.850205	0.800022	0.80424	0.847502	0.858533	0.856695
Copb2	Common MN genes	0.660577	0.89266	0.76716	0.76716	0.72911	0.816344	0.892336	0.900551	0.884985	0.912611	0.94257	0.949924	0.927212	0.93316	0.945165	0.950249	0.928077
Cope	Common MN genes	0.927683	0.978813	0.704572	0.945195	0.619933	0.428494	0.661766	0.797427	0.662847	0.972745	0.97361	0.974259	0.970582	0.976206	0.971555	0.977936	0.976747
Cops2	Common MN genes	0.933088	0.642849	0.833423	0.866069	0.722192	0.841639	0.98465	0.984218	0.982164	0.945165	0.933485	0.930132	0.942029	0.90331	0.929483	0.902552	0.926995
Cops9	Common MN genes	0.91655	0.643606	0.799914	0.778727	0.699384	0.428494	0.907578	0.916982	0.895363	0.974908	0.97891	0.975557	0.981397	0.96896	0.967337	0.976098	0.965174
Coro1c	Common MN genes	0.909415	0.912442	0.729975	0.847152	0.642958	0.461788	0.745001	0.761107	0.741217	0.884382	0.901687	0.902661	0.89098	0.895631	0.857236	0.897253	0.886113
Cotl1	Common MN genes	0.649227	0.975462	0.920549	0.871906	0.770403	0.668901	0.827046	0.69333	0.776997	0.996647	0.996755	0.998702	0.99827	0.997512	0.996972	0.998702	0.997512
Cox4i1	Common MN genes	0.948222	0.996757	0.989839	0.982813	0.973516	0.771052	0.986704	0.992541	0.992217	0.989725	0.994268	0.994484	0.994051	0.990374	0.991239	0.995133	0.991672
Cox5a	Common MN genes	0.977516	0.898497	0.895687	0.913739	0.847584	0.822398	0.982705	0.973624	0.967895	0.984318	0.987346	0.984318	0.983236	0.989401	0.980316	0.987562	0.982046
Cox6a1	Common MN genes	0.992325	0.976435	0.995784	0.989947	0.93017	0.428494	0.996109	0.997622	0.996433	0.985507	0.984318	0.979234	0.969933	0.988319	0.984209	0.984858	0.988644
Cox7b	Common MN genes	0.980002	0.977948	0.997946	0.988434	0.985083	0.705329	0.99373	0.996865	0.997298	0.991348	0.992321	0.992537	0.987995	0.989617	0.989833	0.992645	0.990591
Cox7c	Common MN genes	0.808994	0.894174	0.808669	0.864771	0.928116	0.428494	0.874932	0.713761	0.717868	0.989076	0.983777	0.98183	0.987562	0.987887	0.984318	0.989509	0.991023
Cpe	Common MN genes	0.95287	0.95341	0.962382	0.958599	0.97957	0.910929	0.997298	0.996541	0.997514	0.969176	0.966039	0.967878	0.977287	0.955008	0.953169	0.948302	0.966472
Cpeb2	Common MN genes	0.717544	0.685439	0.775159	0.651497	0.685872	0.590963	0.918279	0.907902	0.920441	0.879299	0.852801	0.861021	0.889033	0.91326	0.883842	0.864266	0.895847
Cpeb4	Common MN genes	0.79559	0.642958	0.866501	0.815371	0.888877	0.845638	0.983461	0.977192	0.98465	0.816461	0.75968	0.820355	0.739888	0.831927	0.797318	0.658231	0.777525
Crmp1	Common MN genes	0.927575	0.917198	0.986056	0.924116	0.977516	0.906388	0.983786	0.983137	0.985947	0.99708	0.998053	0.997837	0.998161	0.996323	0.995457	0.997512	0.995566
Csde1	Common MN genes	0.963031	0.987245	0.978489	0.990163	0.980867	0.983894	0.976219	0.972111	0.974922	0.976963	0.976422	0.979018	0.979991	0.977396	0.981073	0.980208	0.979775
Cse1l	Common MN genes	0.908659	0.878067	0.930062	0.969409	0.934385	0.757648	0.922171	0.920441	0.951465	0.842418	0.897253	0.878001	0.862103	0.799589	0.909366	0.888276	0.860372
Csnk1a1	Common MN genes	0.870068	0.856988	0.784456	0.714193	0.772565	0.839585	0.962491	0.950059	0.953627	0.926238	0.935756	0.934566	0.932944	0.917153	0.939109	0.92732	0.935432
Csnk1d	Common MN genes	0.937953	0.976543	0.89947	0.907794	0.944547	0.846935	0.822614	0.843476	0.800778	0.922128	0.931105	0.924292	0.924724	0.930997	0.928401	0.935756	0.931971
Csnk1e	Common MN genes	0.906497	0.654956	0.966598	0.783699	0.916333	0.947141	0.799481	0.78424	0.812345	0.97772	0.976314	0.975341	0.968094	0.984966	0.981289	0.979775	0.981181
Csnk2a1	Common MN genes	0.942817	0.869636	0.931251	0.916982	0.955572	0.742406	0.830072	0.812777	0.868771	0.926995	0.918127	0.916288	0.936621	0.906446	0.927969	0.92029	0.934891
Ctnnb1	Common MN genes	0.812993	0.837531	0.969084	0.979786	0.949627	0.859907	0.950924	0.928981	0.915901	0.961281	0.958685	0.961929	0.965066	0.971447	0.978585	0.97069	0.967662
Ctsl	Common MN genes	0.954275	0.860556	0.915793	0.798076	0.964652	0.937736	0.884229	0.855475	0.878067	0.918884	0.900498	0.907419	0.939974	0.915315	0.910015	0.926347	0.935756
Cttn	Common MN genes	0.936331	0.857313	0.60707	0.89266	0.924873	0.618852	0.786401	0.843801	0.780024	0.923967	0.9244	0.90385	0.919857	0.925265	0.93024	0.919316	0.901687
Cul1	Common MN genes	0.925522	0.535185	0.799049	0.599395	0.670954	0.743055	0.96876	0.968868	0.961842	0.910664	0.924724	0.907095	0.898767	0.906879	0.922886	0.910015	0.915423
Cul3	Common MN genes	0.629986	0.790725	0.871906	0.872771	0.820776	0.818722	0.980326	0.978273	0.974705	0.960415	0.964309	0.969068	0.970041	0.95955	0.966688	0.970582	0.966039
Cwc15	Common MN genes	0.846071	0.494865	0.864015	0.727921	0.902821	0.428494	0.920657	0.902389	0.949843	0.716959	0.749405	0.733506	0.699546	0.720528	0.703872	0.804997	0.776552
Cyb5b	Common MN genes	0.815804	0.855475	0.552048	0.722949	0.336072	0.815696	0.840233	0.804129	0.831802	0.902336	0.933052	0.92613	0.927428	0.88979	0.930997	0.892927	0.897685
Cyp51	Common MN genes	0.912658	0.959896	0.914712	0.943357	0.707059	0.597665	0.962382	0.964652	0.945411	0.960523	0.96658	0.947004	0.941164	0.94668	0.943868	0.940082	0.932944
Fam49b	Common MN genes	0.807372	0.795265	0.768998	0.60988	0.829532	0.673225	0.875905	0.832883	0.876986	0.864698	0.872161	0.877461	0.89509	0.806944	0.867618	0.841229	0.841337
Dach1	Common MN genes	0.970382	0.844449	0.901524	0.950492	0.907686	0.931034	0.921414	0.89039	0.926927	0.831711	0.837227	0.853018	0.774064	0.839823	0.844041	0.842851	0.860805
Dad1	Common MN genes	0.800778	0.956978	0.97503	0.581234	0.616798	0.860231	0.74446	0.824776	0.721544	0.969068	0.952628	0.940623	0.903634	0.965931	0.977071	0.954359	0.968419
Dars	Common MN genes	0.905091	0.951789	0.91655	0.846611	0.855259	0.979137	0.813534	0.857529	0.852665	0.952736	0.965174	0.965931	0.968635	0.964093	0.964633	0.967337	0.962903
Dazap1	Common MN genes	0.896227	0.856664	0.598314	0.78197	0.57129	0.982705	0.837963	0.784564	0.811804	0.75146	0.769197	0.79775	0.748973	0.809431	0.813108	0.823816	0.803915
Dbi	Common MN genes	0.961085	0.93017	0.935034	0.947898	0.962491	0.976867	0.742082	0.753324	0.714301	0.967229	0.97069	0.966905	0.959875	0.960415	0.970582	0.9748	0.964633
Dclk1	Common MN genes	0.904983	0.856124	0.728246	0.86142	0.894498	0.790942	0.980002	0.979245	0.976111	0.950573	0.952196	0.957063	0.961497	0.930565	0.955873	0.941921	0.955008
Dctn3	Common MN genes	0.775376	0.96649	0.839477	0.78305	0.725327	0.644038	0.898281	0.940006	0.965842	0.920831	0.867835	0.899524	0.92321	0.924292	0.876487	0.930024	0.931105
Dctn4	Common MN genes	0.657442	0.671387	0.797211	0.795049	0.621554	0.594855	0.895363	0.896227	0.893633	0.872269	0.898551	0.888925	0.88687	0.904499	0.864266	0.888492	0.888709
Dctn5	Common MN genes	0.642417	0.903686	0.976111	0.68598	0.785321	0.901848	0.903686	0.905848	0.859367	0.824681	0.789098	0.849557	0.822626	0.807809	0.793965	0.807917	0.819814
Dctn6	Common MN genes	0.935791	0.965193	0.821209	0.593774	0.865096	0.687169	0.917847	0.930926	0.922279	0.857127	0.929699	0.87162	0.886329	0.83117	0.827169	0.876595	0.860913
Dda1	Common MN genes	0.553346	0.802292	0.839801	0.495622	0.960004	0.470328	0.828451	0.817641	0.767268	0.889358	0.860372	0.852801	0.831278	0.848691	0.859615	0.85583	0.893359
Ddost	Common MN genes	0.992217	0.988109	0.977408	0.987785	0.961085	0.783915	0.850395	0.846287	0.81602	0.845339	0.895198	0.889358	0.876163	0.89974	0.88103	0.943435	0.921371
Ddx1	Common MN genes	0.852556	0.905416	0.851151	0.847368	0.625014	0.780672	0.909091	0.917198	0.901308	0.966364	0.959983	0.9695	0.963984	0.967986	0.970041	0.965931	0.967121
Ddx17	Common MN genes	0.966706	0.906821	0.974814	0.958923	0.952438	0.906821	0.963788	0.954708	0.957734	0.965715	0.959766	0.961389	0.944408	0.9801	0.970149	0.968527	0.9695
Ddx42	Common MN genes	0.913847	0.913739	0.957842	0.931791	0.947789	0.926062	0.857205	0.808886	0.874284	0.794614	0.801428	0.819598	0.797426	0.841661	0.828034	0.812892	0.849124
Ddx46	Common MN genes	0.80975	0.874608	0.877635	0.846827	0.902389	0.954275	0.768349	0.786942	0.771592	0.949816	0.924616	0.95371	0.950141	0.956414	0.959442	0.946247	0.947329
Ddx5	Common MN genes	0.993514	0.993947	0.991785	0.985191	0.997081	0.940655	0.992974	0.992974	0.99373	0.996106	0.995998	0.997188	0.997404	0.996755	0.995674	0.995782	0.996431
Ddx6	Common MN genes	0.964869	0.969193	0.967679	0.967355	0.976543	0.973192	0.949087	0.95914	0.95341	0.883517	0.915207	0.904391	0.888925	0.908393	0.920722	0.926238	0.91618
Degs1	Common MN genes	0.741325	0.942601	0.768674	0.759053	0.424819	0.575289	0.882499	0.880445	0.903146	0.809864	0.825654	0.83409	0.819057	0.847934	0.831603	0.857452	0.832793
Dek	Common MN genes	0.914712	0.90628	0.769538	0.873743	0.940006	0.953302	0.729218	0.79105	0.778943	0.787692	0.796236	0.852693	0.825438	0.852369	0.853558	0.855397	0.782176
Desi1	Common MN genes	0.927251	0.297914	0.882067	0.525889	0.770619	0.599503	0.805426	0.711707	0.770727	0.897145	0.895739	0.872702	0.845555	0.885248	0.859723	0.813325	0.873675
Dhcr24	Common MN genes	0.859583	0.91309	0.829964	0.826073	0.584153	0.686845	0.899146	0.852124	0.900876	0.753623	0.793532	0.731343	0.650984	0.705819	0.633679	0.732966	0.655959
Dhx15	Common MN genes	0.893417	0.78424	0.957518	0.891579	0.698519	0.798292	0.869744	0.831478	0.837963	0.948518	0.952304	0.963552	0.957603	0.955657	0.962362	0.96658	0.963227
Dicer1	Common MN genes	0.935034	0.812993	0.937412	0.936872	0.939466	0.95341	0.855151	0.839693	0.832018	0.954899	0.951006	0.952412	0.953385	0.956305	0.958469	0.950465	0.956197
Dld	Common MN genes	0.9546	0.877311	0.934818	0.977192	0.887796	0.58718	0.976543	0.978921	0.980435	0.896604	0.896712	0.885897	0.87281	0.911529	0.90093	0.899849	0.91207
Dlg5	Common MN genes	0.912442	0.931359	0.860556	0.876338	0.893201	0.813966	0.723381	0.775916	0.666306	0.802509	0.781635	0.799805	0.789206	0.822626	0.814298	0.800022	0.810296
Dlgap4	Common MN genes	0.834829	0.586855	0.970382	0.79613	0.804994	0.706843	0.732029	0.778727	0.745217	0.791261	0.789639	0.743457	0.727125	0.761086	0.749081	0.725287	0.75849
Dnaja1	Common MN genes	0.955464	0.979137	0.945519	0.913199	0.940331	0.926927	0.959572	0.958923	0.96649	0.971772	0.971555	0.969176	0.967337	0.979667	0.975773	0.968202	0.973827
Dnaja2	Common MN genes	0.9506	0.913955	0.95795	0.877311	0.86769	0.993839	0.970057	0.976759	0.97957	0.978045	0.97772	0.980208	0.98183	0.972204	0.97891	0.980424	0.978693
Dnajc2	Common MN genes	0.970598	0.878283	0.808886	0.972111	0.903686	0.952005	0.838072	0.86542	0.77116	0.90796	0.862535	0.879407	0.921696	0.880597	0.883625	0.827601	0.837119
Dnajc5	Common MN genes	0.994919	0.978381	0.983137	0.991568	0.981407	0.979678	0.962166	0.966922	0.965733	0.93316	0.916613	0.951222	0.947761	0.897794	0.924075	0.926779	0.934458
Dnajc6	Common MN genes	0.867366	0.861961	0.787374	0.881851	0.558426	0.86088	0.965409	0.951465	0.951897	0.926779	0.926995	0.918235	0.931971	0.884166	0.887194	0.896712	0.893251
Dnajc7	Common MN genes	0.845314	0.850719	0.823587	0.913847	0.877527	0.910712	0.746514	0.773322	0.813209	0.816894	0.758274	0.764655	0.765953	0.82003	0.774064	0.799913	0.797642
Dnajc8	Common MN genes	0.703059	0.691385	0.972435	0.758404	0.628905	0.816668	0.805751	0.777754	0.734407	0.933593	0.923643	0.939217	0.937054	0.9191	0.92905	0.937595	0.940299
Dner	Common MN genes	0.827154	0.683494	0.810723	0.751162	0.929845	0.686196	0.968112	0.974489	0.970273	0.950249	0.945814	0.952196	0.956414	0.93554	0.938784	0.917478	0.962362
Dpp6	Common MN genes	0.969625	0.972544	0.936331	0.934602	0.887904	0.913415	0.75808	0.774943	0.773538	0.959983	0.971231	0.960199	0.96366	0.950573	0.929159	0.952087	0.963335
Dpysl2	Common MN genes	0.968112	0.963788	0.948114	0.867258	0.925305	0.926819	0.998379	0.998379	0.998379	0.985399	0.990915	0.991023	0.989617	0.987021	0.98302	0.991456	0.986156
Dpysl3	Common MN genes	0.988109	0.981624	0.991244	0.985839	0.976867	0.987028	0.998811	0.999027	0.999243	0.966039	0.976855	0.954467	0.944517	0.966796	0.951438	0.958036	0.959658
Dr1	Common MN genes	0.907794	0.631932	0.788888	0.650308	0.721976	0.584153	0.94206	0.90347	0.948978	0.850963	0.733074	0.770387	0.793424	0.761951	0.798616	0.593121	0.682998
Dtd1	Common MN genes	0.95114	0.669333	0.976867	0.528808	0.522538	0.845855	0.759053	0.821965	0.800346	0.912719	0.901471	0.907744	0.935648	0.894116	0.894116	0.921588	0.914125
Dtna	Common MN genes	0.725867	0.887147	0.635175	0.798833	0.565885	0.74392	0.808021	0.808453	0.790401	0.813649	0.870106	0.828575	0.810513	0.820571	0.79894	0.832252	0.816786
Dync1i2	Common MN genes	0.742514	0.700789	0.862934	0.836342	0.555075	0.577883	0.933305	0.938169	0.951249	0.916937	0.925157	0.92202	0.902444	0.887303	0.919641	0.915098	0.907852
Dync1li2	Common MN genes	0.897416	0.889742	0.567506	0.921522	0.54913	0.911793	0.941196	0.934818	0.935683	0.945706	0.950141	0.957387	0.950465	0.934566	0.94138	0.93727	0.925698
Dynll2	Common MN genes	0.977948	0.965409	0.984975	0.839585	0.978273	0.735056	0.980759	0.975246	0.96822	0.980208	0.985075	0.979883	0.98356	0.973502	0.974151	0.968635	0.972961
Dyrk1a	Common MN genes	0.81148	0.537996	0.808777	0.830829	0.801319	0.656902	0.869528	0.784996	0.75981	0.807917	0.780878	0.798075	0.806078	0.788449	0.788016	0.831062	0.797318
Ecel1	Common MN genes	0.973949	0.884445	0.973949	0.664144	0.579289	0.618312	0.964544	0.971787	0.961626	0.836037	0.882327	0.783366	0.668505	0.854424	0.711551	0.766602	0.793532
Edf1	Common MN genes	0.915252	0.366879	0.870284	0.985299	0.74392	0.428494	0.936764	0.919901	0.947898	0.923751	0.86048	0.813865	0.84469	0.896279	0.879191	0.850746	0.915531
Eef1a1	Common MN genes	0.928656	0.973949	0.938385	0.969517	0.946492	0.927575	0.999351	0.999351	0.999135	0.999784	1	1	1	0.999892	1	1	1
Eef1b2	Common MN genes	0.98865	0.99092	0.902065	0.992109	0.996649	0.995136	0.960112	0.959031	0.95287	0.970582	0.957495	0.959658	0.958901	0.969717	0.973935	0.950573	0.959875
Eef2	Common MN genes	0.994271	0.995028	0.995568	0.998162	0.996109	0.994703	0.992758	0.993839	0.991568	0.989185	0.991997	0.992645	0.989509	0.993943	0.991888	0.993727	0.992645
Efna5	Common MN genes	0.884985	0.839909	0.950276	0.825965	0.968976	0.691277	0.85461	0.804994	0.646741	0.829981	0.754921	0.785637	0.782176	0.734696	0.707874	0.787584	0.744971
Ehbp1	Common MN genes	0.886391	0.895579	0.867258	0.844341	0.919576	0.884445	0.945411	0.922819	0.932548	0.915856	0.914774	0.9191	0.909366	0.948843	0.916937	0.918127	0.935972
Eif1ax	Common MN genes	0.854394	0.922171	0.958707	0.935575	0.973408	0.986272	0.972652	0.967679	0.96422	0.979234	0.96539	0.962146	0.972637	0.974043	0.978261	0.945814	0.974584
Eif2b1	Common MN genes	0.948114	0.60707	0.880986	0.899687	0.548157	0.428494	0.752027	0.853746	0.62069	0.660394	0.665152	0.758058	0.755029	0.715228	0.711659	0.815271	0.706143
Eif2s1	Common MN genes	0.878283	0.715058	0.972868	0.852124	0.768566	0.879256	0.851151	0.77624	0.783267	0.938135	0.931538	0.933485	0.920506	0.931105	0.957495	0.919425	0.939974
Eif2s2	Common MN genes	0.954491	0.766512	0.852881	0.935142	0.910712	0.895795	0.808994	0.837747	0.749324	0.920506	0.925589	0.937811	0.932187	0.892278	0.919965	0.915315	0.918559
Eif3a	Common MN genes	0.96876	0.975138	0.91936	0.98184	0.980218	0.947249	0.958059	0.962382	0.941844	0.963552	0.955224	0.960848	0.949275	0.972745	0.964525	0.964309	0.96485
Eif3b	Common MN genes	0.864015	0.891039	0.973084	0.956761	0.934926	0.891579	0.722625	0.768457	0.762945	0.952087	0.958469	0.946139	0.945274	0.96539	0.961605	0.95544	0.955116
Eif3e	Common MN genes	0.956005	0.968003	0.979894	0.962815	0.983137	0.924873	0.869636	0.80521	0.875149	0.990374	0.990591	0.99416	0.99589	0.991023	0.992321	0.994917	0.993078
Eif3h	Common MN genes	0.989839	0.968328	0.986812	0.98692	0.98411	0.989947	0.964977	0.966598	0.944438	0.982371	0.986372	0.987778	0.989185	0.984534	0.984858	0.987021	0.984209
Eif3i	Common MN genes	0.983245	0.911145	0.864771	0.973624	0.882067	0.943574	0.849962	0.866609	0.896876	0.964417	0.977504	0.976206	0.968851	0.975881	0.972745	0.975773	0.971663
Eif3l	Common MN genes	0.839801	0.910712	0.853205	0.841423	0.791698	0.846827	0.916117	0.899146	0.91428	0.930348	0.932187	0.922994	0.911421	0.943327	0.952844	0.931971	0.950465
Eif3m	Common MN genes	0.949195	0.924765	0.970814	0.952654	0.812669	0.900227	0.779808	0.749649	0.698411	0.979559	0.986697	0.986913	0.990266	0.978261	0.985832	0.98886	0.981722
Eif4a2	Common MN genes	0.809642	0.726948	0.672468	0.516052	0.645984	0.655929	0.971787	0.961734	0.969084	0.995674	0.994809	0.994917	0.997512	0.990591	0.992862	0.990482	0.993943
Eif4a3	Common MN genes	0.695709	0.969084	0.915252	0.835261	0.912658	0.61442	0.777754	0.789861	0.727813	0.970257	0.965931	0.970798	0.966905	0.975124	0.975124	0.972204	0.979883
Eif4g2	Common MN genes	0.987785	0.995352	0.981732	0.984434	0.979678	0.97957	0.998703	0.998054	0.998162	0.997188	0.995782	0.996972	0.995998	0.995674	0.996864	0.995566	0.996106
Eif5	Common MN genes	0.894282	0.967895	0.861312	0.876446	0.901524	0.858934	0.965301	0.951249	0.963139	0.983885	0.980748	0.985615	0.984318	0.979883	0.984642	0.985399	0.985075
Eif5b	Common MN genes	0.681764	0.645876	0.798508	0.705978	0.776889	0.666414	0.806075	0.755918	0.844017	0.886113	0.857019	0.865239	0.909042	0.897577	0.888925	0.894873	0.878109
Eif6	Common MN genes	0.673981	0.973084	0.542428	0.460923	0.223976	0.428494	0.785321	0.751703	0.709113	0.758382	0.811811	0.794289	0.770171	0.751352	0.731127	0.712632	0.771793
Elavl2	Common MN genes	0.966814	0.962923	0.974273	0.906713	0.946276	0.854718	0.992001	0.989082	0.991136	0.904499	0.895847	0.906987	0.942353	0.793965	0.844149	0.88276	0.858858
Emc2	Common MN genes	0.91201	0.915793	0.663388	0.835802	0.969301	0.892012	0.850178	0.837315	0.884445	0.791477	0.763033	0.736643	0.778174	0.739455	0.768765	0.74443	0.768332
Enah	Common MN genes	0.872014	0.939034	0.848989	0.879689	0.873851	0.915252	0.952762	0.943249	0.944222	0.853666	0.848367	0.840904	0.819814	0.887843	0.860805	0.84642	0.847177
Enc1	Common MN genes	0.499189	0.796022	0.884337	0.973408	0.952113	0.968868	0.967571	0.973949	0.974814	0.71101	0.7679	0.717499	0.654121	0.837119	0.747567	0.731343	0.745728
Enox1	Common MN genes	0.73819	0.706843	0.872014	0.6956	0.397471	0.639066	0.744352	0.761647	0.814507	0.878542	0.867727	0.863292	0.877028	0.879083	0.870755	0.882327	0.889141
Ap3d1	Common MN genes	0.849746	0.828127	0.719382	0.944979	0.924549	0.857853	0.797752	0.78305	0.809534	0.917586	0.941164	0.92732	0.926887	0.939758	0.937595	0.936405	0.934999
Prpf38b	Common MN genes	0.916874	0.947249	0.688466	0.967463	0.958275	0.941412	0.801319	0.744136	0.712355	0.879515	0.683106	0.740969	0.795695	0.85583	0.848151	0.690785	0.800238
Rere	Common MN genes	0.930062	0.912766	0.932872	0.936331	0.9239	0.985407	0.776024	0.780456	0.73711	0.900498	0.889574	0.89098	0.84523	0.962687	0.928293	0.92851	0.925049
Zmym4	Common MN genes	0.71722	0.708896	0.838936	0.622527	0.64566	0.928332	0.909848	0.929089	0.938277	0.725719	0.688514	0.732966	0.73621	0.735021	0.740753	0.747567	0.754056
Ccar1	Common MN genes	0.957626	0.958275	0.935683	0.957842	0.975678	0.97557	0.892985	0.857745	0.908226	0.84231	0.813649	0.885248	0.777417	0.883085	0.82652	0.897685	0.872918
Dnajb11	Common MN genes	0.868663	0.776889	0.8291	0.794833	0.918279	0.551508	0.906388	0.864231	0.86769	0.835929	0.838849	0.732317	0.778066	0.878867	0.825979	0.85637	0.874324
Lrrc75b	Common MN genes	0.611718	0.796887	0.698951	0.445141	0.568803	0.46622	0.819587	0.805859	0.785645	0.927969	0.910231	0.850097	0.782501	0.954791	0.874973	0.868051	0.884815
Fads1	Common MN genes	0.90801	0.828883	0.968328	0.467517	0.795373	0.428494	0.921846	0.88985	0.886499	0.939866	0.924183	0.94257	0.918992	0.92732	0.932187	0.939109	0.934242
Rbm27	Common MN genes	0.707707	0.788023	0.635499	0.724462	0.651389	0.523187	0.830289	0.793536	0.847152	0.799373	0.753948	0.79894	0.753407	0.838308	0.816029	0.830089	0.809864
Anp32a	Common MN genes	0.931791	0.948006	0.967247	0.94606	0.803373	0.981516	0.889093	0.871257	0.91709	0.955332	0.943327	0.940839	0.947004	0.947329	0.954575	0.945923	0.945923
Ttbk2	Common MN genes	0.908442	0.942817	0.779267	0.856016	0.832342	0.950384	0.955032	0.945952	0.945627	0.881246	0.86459	0.826952	0.803266	0.900822	0.878758	0.802293	0.819057
Ubr3	Common MN genes	0.807805	0.869852	0.88358	0.684034	0.649876	0.576046	0.942168	0.948006	0.9506	0.785204	0.798724	0.798291	0.815488	0.783258	0.815488	0.801319	0.808674
Klc1	Common MN genes	0.558967	0.845746	0.828775	0.814831	0.824451	0.841855	0.969841	0.972003	0.965193	0.970474	0.967445	0.964309	0.956305	0.963768	0.962254	0.96247	0.968311
Cep170b	Common MN genes	0.881418	0.797643	0.895038	0.743487	0.792671	0.917847	0.676576	0.747811	0.703816	0.765737	0.810513	0.751352	0.728207	0.778066	0.742375	0.755246	0.760437
Ccnt2	Common MN genes	0.822181	0.631067	0.89439	0.724246	0.845314	0.764674	0.729651	0.779808	0.817425	0.892061	0.843067	0.826736	0.883842	0.82414	0.855613	0.856587	0.824789
Tmeff1	Common MN genes	0.829208	0.823154	0.902389	0.705329	0.587612	0.924116	0.992649	0.993298	0.993622	0.999676	0.999351	0.999567	0.999351	0.999784	0.999459	0.998594	0.999459
Ltv1	Common MN genes	0.759918	0.97103	0.851043	0.837639	0.896444	0.89666	0.828991	0.817425	0.829316	0.78369	0.72799	0.750054	0.757409	0.795804	0.754921	0.679321	0.769738
Tmem126a	Common MN genes	0.633769	0.855367	0.862285	0.382337	0.856664	0.428494	0.841206	0.798616	0.845314	0.685918	0.774281	0.732533	0.681376	0.69111	0.686026	0.729072	0.633679
Kcmf1	Common MN genes	0.776349	0.73084	0.769863	0.53097	0.687926	0.626959	0.862718	0.878932	0.900767	0.813541	0.812027	0.873134	0.895306	0.833009	0.788665	0.895739	0.891413
Fam193a	Common MN genes	0.853637	0.880013	0.900443	0.821209	0.695492	0.689115	0.870825	0.850395	0.900335	0.793965	0.81008	0.811811	0.780878	0.754164	0.780878	0.823167	0.76671
Cxadr	Common MN genes	0.978597	0.93471	0.861204	0.96422	0.975138	0.975462	0.958167	0.962707	0.96368	0.938784	0.959875	0.967121	0.971772	0.913692	0.947004	0.968851	0.952412
Tspan7	Common MN genes	0.679278	0.725867	0.884769	0.452059	0.857745	0.88985	0.854394	0.79332	0.837099	0.950357	0.955116	0.96074	0.967986	0.923318	0.934026	0.969176	0.962687
Mrpl30	Common MN genes	0.981191	0.929413	0.959356	0.917631	0.95568	0.980759	0.793103	0.814507	0.859583	0.718689	0.762925	0.685377	0.698464	0.783582	0.790071	0.665585	0.712957
Bod1l	Common MN genes	0.704464	0.84045	0.639823	0.619609	0.778619	0.53605	0.880662	0.852881	0.846071	0.832252	0.751893	0.808782	0.851503	0.822842	0.805646	0.790504	0.792234
Prkacb	Common MN genes	0.998919	0.995568	0.996217	0.997838	0.99946	0.998595	0.947141	0.975354	0.950276	0.867835	0.857884	0.883734	0.920831	0.800346	0.873459	0.833658	0.870214
Soga3	Common MN genes	0.96422	0.974489	0.927792	0.972976	0.958491	0.866933	0.960545	0.960437	0.94887	0.9801	0.969608	0.968743	0.974043	0.98302	0.973394	0.966256	0.975341
Txnl1	Common MN genes	0.576586	0.874392	0.851476	0.688466	0.223976	0.428494	0.953735	0.94379	0.956221	0.881462	0.851287	0.864806	0.85345	0.804023	0.841661	0.927536	0.86459
Mtdh	Common MN genes	0.91309	0.641877	0.799265	0.952329	0.754513	0.547292	0.852881	0.843152	0.788239	0.891629	0.886978	0.894549	0.868051	0.878434	0.913801	0.883409	0.896279
Pa2g4	Common MN genes	0.976651	0.907253	0.962058	0.963031	0.857097	0.505351	0.917198	0.862609	0.889417	0.902985	0.883625	0.926887	0.81127	0.964958	0.948735	0.947869	0.929916
Sub1	Common MN genes	0.831153	0.759053	0.888553	0.86596	0.877202	0.927035	0.964652	0.960004	0.957626	0.936621	0.96247	0.940407	0.794181	0.598205	0.940082	0.559701	0.675644
Bptf	Common MN genes	0.676467	0.807372	0.900767	0.863907	0.863366	0.917306	0.87623	0.859367	0.862393	0.822626	0.809431	0.85637	0.780121	0.866104	0.804023	0.820355	0.851071
Pclo	Common MN genes	0.813966	0.896227	0.838396	0.890174	0.902497	0.923035	0.937736	0.9466	0.94433	0.861129	0.81949	0.859507	0.861129	0.78607	0.805538	0.784772	0.849881
Prrc2b	Common MN genes	0.889417	0.903578	0.915901	0.94887	0.954167	0.970165	0.934061	0.929737	0.932224	0.941164	0.922669	0.936189	0.903958	0.960523	0.944949	0.939866	0.943111
Atp5o	Common MN genes	0.875797	0.849854	0.875581	0.885526	0.891147	0.913523	0.974489	0.977084	0.978489	0.977612	0.973935	0.978369	0.971555	0.973286	0.970906	0.977396	0.97361
Atp5e	Common MN genes	0.940871	0.811696	0.803048	0.699492	0.822938	0.79332	0.959464	0.941736	0.966166	0.947978	0.965607	0.950898	0.940515	0.949924	0.959009	0.953926	0.956954
Son	Common MN genes	0.738407	0.772781	0.746946	0.486974	0.605664	0.729327	0.922819	0.914496	0.920982	0.911205	0.882219	0.89217	0.86459	0.939325	0.915531	0.908609	0.925157
Ep400	Common MN genes	0.801427	0.851584	0.659064	0.822181	0.886715	0.838288	0.736353	0.73592	0.76662	0.820571	0.816137	0.85464	0.805538	0.876487	0.869673	0.860372	0.851936
Epb41l4a	Common MN genes	0.637012	0.864123	0.788563	0.626959	0.699168	0.878175	0.715815	0.707815	0.697762	0.768224	0.77255	0.793316	0.817326	0.869349	0.790396	0.834523	0.835172
Eprs	Common MN genes	0.926278	0.731164	0.943141	0.969949	0.952005	0.818938	0.820776	0.854718	0.835153	0.961172	0.967229	0.96896	0.963335	0.960956	0.968094	0.9695	0.967337
Eps15	Common MN genes	0.853854	0.758513	0.82964	0.482542	0.705762	0.428494	0.985083	0.981083	0.97503	0.959009	0.962254	0.952628	0.964417	0.922345	0.939758	0.939217	0.93262
Erc1	Common MN genes	0.836774	0.73538	0.811372	0.863582	0.823479	0.867366	0.849854	0.82737	0.85688	0.947761	0.934242	0.939109	0.916504	0.94549	0.938676	0.915964	0.938135
Erc2	Common MN genes	0.781429	0.736569	0.665658	0.883256	0.77116	0.429575	0.939682	0.942925	0.940979	0.880381	0.856803	0.870322	0.8939	0.827493	0.8687	0.770279	0.844041
Esd	Common MN genes	0.772673	0.965625	0.659712	0.556264	0.704572	0.428494	0.858718	0.835153	0.79559	0.915747	0.897469	0.892602	0.859507	0.878109	0.898875	0.890764	0.887843
Esrrg	Common MN genes	0.939358	0.852556	0.828235	0.876122	0.841747	0.596908	0.863042	0.873095	0.89266	0.839066	0.848151	0.850854	0.858101	0.830954	0.809323	0.826844	0.852909
Etf1	Common MN genes	0.814182	0.744352	0.784131	0.867149	0.890606	0.598098	0.941087	0.957626	0.950059	0.878867	0.8886	0.906122	0.849557	0.899849	0.859074	0.920506	0.894225
Etfa	Common MN genes	0.892012	0.929629	0.955032	0.894174	0.718949	0.428494	0.702627	0.84726	0.804345	0.924832	0.94138	0.919857	0.905797	0.946896	0.930348	0.950681	0.92321
Etnk1	Common MN genes	0.812237	0.360826	0.939034	0.799589	0.527835	0.785861	0.945303	0.937736	0.922387	0.874	0.866645	0.880056	0.894116	0.79483	0.883517	0.818192	0.847718
Evl	Common MN genes	0.818506	0.782402	0.50254	0.56902	0.714734	0.713761	0.894282	0.910929	0.89947	0.936838	0.944949	0.915964	0.943219	0.898875	0.899416	0.846636	0.887519
Exoc1	Common MN genes	0.668684	0.875149	0.645336	0.502108	0.629554	0.689331	0.770079	0.804237	0.778186	0.874865	0.868808	0.862968	0.894549	0.858966	0.856911	0.84934	0.877569
Fads2	Common MN genes	0.551292	0.683169	0.940006	0.298454	0.369365	0.524376	0.823046	0.92109	0.887147	0.93727	0.940623	0.950681	0.925914	0.957603	0.944625	0.956846	0.943435
Faf1	Common MN genes	0.597989	0.822722	0.756351	0.522538	0.835693	0.880013	0.922603	0.929197	0.929089	0.727666	0.739996	0.667316	0.678023	0.732209	0.732749	0.705927	0.769414
Fam13b	Common MN genes	0.744352	0.742947	0.656686	0.403416	0.398443	0.428494	0.798941	0.749432	0.759161	0.886005	0.869998	0.835929	0.835605	0.877352	0.848799	0.81538	0.8435
Fam162a	Common MN genes	0.886066	0.928656	0.320506	0.26181	0.439088	0.428494	0.893849	0.916658	0.839261	0.723772	0.689812	0.722583	0.760653	0.739022	0.677807	0.630218	0.629678
Fam168b	Common MN genes	0.810723	0.715274	0.911469	0.79159	0.809534	0.879905	0.930926	0.944547	0.938169	0.972312	0.970798	0.9748	0.97772	0.955548	0.968743	0.970149	0.970149
Fam169a	Common MN genes	0.88985	0.86142	0.698411	0.55421	0.787699	0.77116	0.930278	0.920333	0.856016	0.829764	0.748864	0.742267	0.809431	0.840472	0.789206	0.807268	0.824897
Fam171a1	Common MN genes	0.652038	0.750622	0.840342	0.740136	0.559831	0.709221	0.940006	0.960653	0.940223	0.793532	0.832793	0.798832	0.741185	0.771144	0.834199	0.798183	0.784664
Tvp23b	Common MN genes	0.54913	0.883796	0.864231	0.9012	0.820668	0.641336	0.814831	0.785537	0.809642	0.927644	0.904716	0.937486	0.917694	0.956846	0.94019	0.934458	0.951871
Prxl2a	Common MN genes	0.966382	0.979029	0.94206	0.875041	0.972544	0.972652	0.818938	0.849962	0.854827	0.937486	0.934134	0.93262	0.96074	0.930132	0.932079	0.951763	0.949059
Fam98a	Common MN genes	0.823154	0.857205	0.974922	0.924333	0.789861	0.92563	0.753432	0.708356	0.774403	0.774389	0.791261	0.785961	0.794398	0.705711	0.771144	0.771361	0.752542
Farsb	Common MN genes	0.854286	0.655172	0.653767	0.445033	0.370879	0.428494	0.948978	0.967247	0.955464	0.88687	0.93554	0.907528	0.912395	0.897685	0.901471	0.923318	0.901904
Fasn	Common MN genes	0.92563	0.889634	0.932332	0.894066	0.938601	0.909091	0.837099	0.851367	0.814615	0.976206	0.979883	0.978585	0.9748	0.980208	0.974692	0.978153	0.97653
Faxc	Common MN genes	0.816993	0.587396	0.787915	0.295968	0.244406	0.428494	0.883904	0.844774	0.873527	0.684296	0.691975	0.710253	0.730803	0.679104	0.584144	0.674995	0.579818
Fbxo9	Common MN genes	0.772349	0.85915	0.702951	0.778835	0.768349	0.984218	0.797535	0.73992	0.859691	0.924075	0.919749	0.904499	0.922886	0.892602	0.908717	0.870755	0.88568
Fez1	Common MN genes	0.885418	0.774619	0.774078	0.872662	0.904227	0.709004	0.864988	0.862069	0.852124	0.873459	0.880381	0.840363	0.748432	0.930024	0.863725	0.839174	0.905689
Fh1	Common MN genes	0.841855	0.864015	0.554318	0.390552	0.592693	0.645011	0.836018	0.840017	0.784888	0.93262	0.921804	0.946355	0.93143	0.922237	0.943759	0.900389	0.926455
Fnbp1	Common MN genes	0.843801	0.866825	0.828667	0.945627	0.830937	0.792779	0.703816	0.67517	0.768133	0.841229	0.841878	0.817867	0.784447	0.887952	0.82241	0.857344	0.846853
Fnbp1l	Common MN genes	0.861745	0.884337	0.830937	0.819263	0.882607	0.791914	0.980218	0.978165	0.979354	0.986156	0.981073	0.981181	0.983344	0.984101	0.985724	0.980965	0.980748
Fnta	Common MN genes	0.842504	0.936764	0.890715	0.795157	0.871581	0.482651	0.710518	0.742731	0.828451	0.736859	0.783149	0.714363	0.698572	0.673805	0.679429	0.599719	0.593013
Foxk2	Common MN genes	0.869852	0.881743	0.941736	0.612582	0.499189	0.955032	0.898606	0.914604	0.902497	0.817759	0.784123	0.808674	0.770495	0.851287	0.848908	0.83939	0.845014
Foxp1	Common MN genes	0.972976	0.978165	0.964004	0.402011	0.646092	0.553237	0.927792	0.946276	0.935142	0.934891	0.961821	0.915098	0.873026	0.880921	0.829548	0.914017	0.837876
Fscn1	Common MN genes	0.990271	0.994811	0.992325	0.988542	0.984542	0.994379	0.956221	0.965517	0.967355	0.901146	0.877352	0.865563	0.796993	0.94722	0.915747	0.934026	0.928293
Fstl5	Common MN genes	0.962599	0.94833	0.944979	0.946817	0.933737	0.612799	0.739488	0.760566	0.724678	0.753191	0.720636	0.769738	0.794073	0.813974	0.810513	0.828899	0.833333
Fth1	Common MN genes	0.990163	0.988758	0.989298	0.968544	0.944871	0.964436	0.963031	0.969409	0.970057	0.992645	0.995025	0.991564	0.991239	0.993727	0.994484	0.995349	0.994376
Fubp1	Common MN genes	0.971354	0.97503	0.911685	0.932224	0.869528	0.985947	0.897308	0.888444	0.88985	0.983236	0.9801	0.982046	0.981506	0.986805	0.986481	0.982695	0.98475
Fyttd1	Common MN genes	0.704897	0.805643	0.934926	0.816128	0.534645	0.792995	0.934494	0.925197	0.907145	0.91737	0.888492	0.931646	0.900281	0.883625	0.908825	0.924616	0.919641
Fzd3	Common MN genes	0.844233	0.903254	0.801427	0.827694	0.772781	0.911145	0.912226	0.898822	0.893525	0.72096	0.782176	0.745295	0.736535	0.865347	0.789747	0.860805	0.820679
G3bp1	Common MN genes	0.960329	0.959464	0.966922	0.931467	0.969084	0.928008	0.663063	0.765647	0.718193	0.975665	0.977936	0.980424	0.981289	0.974151	0.979559	0.979667	0.974908
G3bp2	Common MN genes	0.664253	0.872771	0.615717	0.249811	0.652794	0.570857	0.958707	0.940979	0.946276	0.949167	0.958901	0.95663	0.951655	0.950681	0.952087	0.948086	0.946031
Gabrg2	Common MN genes	0.737542	0.685548	0.949843	0.842287	0.59626	0.969301	0.904659	0.892876	0.833315	0.814406	0.760978	0.834415	0.852152	0.736967	0.7679	0.76844	0.77374
Gap43	Common MN genes	0.996217	0.992974	0.994811	0.992001	0.978813	0.974705	0.99946	0.99946	0.99946	0.974367	0.98064	0.975016	0.979559	0.913801	0.918451	0.952196	0.917153
Garnl3	Common MN genes	0.745433	0.770836	0.88758	0.951465	0.753648	0.908659	0.715166	0.724462	0.751054	0.816569	0.824465	0.864157	0.876055	0.748107	0.831278	0.798832	0.811162
Gbf1	Common MN genes	0.761323	0.74673	0.827154	0.544374	0.560912	0.666631	0.760891	0.78251	0.729327	0.759139	0.734047	0.773956	0.739779	0.81008	0.766385	0.776552	0.803158
Gdap1l1	Common MN genes	0.73992	0.951032	0.870933	0.649768	0.799914	0.916766	0.8478	0.86996	0.811696	0.915207	0.922777	0.890115	0.886221	0.887627	0.873351	0.898767	0.872594
Gdi2	Common MN genes	0.920225	0.83418	0.856232	0.840342	0.91655	0.708464	0.966814	0.947465	0.933196	0.977936	0.98475	0.982695	0.980316	0.980748	0.979991	0.984318	0.980965
Gdpd1	Common MN genes	0.938493	0.841098	0.711058	0.861637	0.950492	0.974814	0.975246	0.980326	0.970706	0.722042	0.735886	0.655202	0.71393	0.609236	0.653796	0.685377	0.624486
Glg1	Common MN genes	0.711815	0.6769	0.74619	0.710193	0.462328	0.804562	0.896119	0.885094	0.889742	0.908717	0.915856	0.922345	0.86286	0.940299	0.916072	0.923643	0.918235
Gmfb	Common MN genes	0.913199	0.956329	0.918495	0.927035	0.864555	0.839261	0.964328	0.943033	0.95741	0.944192	0.946788	0.937919	0.946571	0.907203	0.949384	0.942894	0.952196
Gnal	Common MN genes	0.874932	0.796346	0.794725	0.639931	0.652146	0.717976	0.914388	0.906388	0.919144	0.849448	0.898983	0.83766	0.868267	0.834848	0.860372	0.85464	0.847069
Gnao1	Common MN genes	0.964328	0.97049	0.940331	0.9733	0.923576	0.9506	0.98011	0.982705	0.980651	0.983128	0.991456	0.987346	0.988752	0.983128	0.979883	0.989293	0.982803
Gnaq	Common MN genes	0.849422	0.734515	0.641336	0.74165	0.796995	0.988866	0.986812	0.987569	0.986056	0.931538	0.93316	0.938568	0.959442	0.901579	0.894441	0.908068	0.915856
Gnaz	Common MN genes	0.674522	0.855259	0.744028	0.868663	0.81656	0.428494	0.914171	0.940547	0.903038	0.869565	0.845122	0.807809	0.859399	0.679321	0.740645	0.670128	0.72334
Gnb1	Common MN genes	0.987137	0.971246	0.951465	0.971246	0.979029	0.967679	0.987353	0.987461	0.985299	0.995133	0.996106	0.99708	0.997729	0.992754	0.994917	0.995241	0.993835
Rack1	Common MN genes	0.976975	0.91882	0.972327	0.987893	0.986164	0.980543	0.92163	0.934169	0.92563	0.978802	0.97653	0.976098	0.972204	0.985507	0.98356	0.982046	0.983669
Gng2	Common MN genes	0.787699	0.851367	0.888877	0.743163	0.908875	0.918063	0.998595	0.997838	0.997622	0.981938	0.985399	0.981073	0.977504	0.981073	0.97599	0.982479	0.980532
Got1	Common MN genes	0.752027	0.657118	0.764026	0.676251	0.576262	0.428494	0.962707	0.966814	0.953843	0.7931	0.834415	0.822193	0.763898	0.753299	0.765196	0.779472	0.766385
Gpcpd1	Common MN genes	0.790942	0.757648	0.634526	0.602313	0.743271	0.759053	0.80748	0.819587	0.825965	0.927104	0.941056	0.939541	0.960091	0.927969	0.930565	0.953169	0.938568
Gpi1	Common MN genes	0.794833	0.698303	0.888012	0.720895	0.711491	0.907253	0.925738	0.933088	0.937196	0.895955	0.926455	0.910556	0.910123	0.91499	0.921804	0.921263	0.923859
Gpm6b	Common MN genes	0.943357	0.93298	0.942817	0.836234	0.74619	0.816236	0.978597	0.97503	0.976759	0.952628	0.95663	0.962795	0.965931	0.967013	0.977504	0.977287	0.970798
Grb2	Common MN genes	0.57637	0.816452	0.792347	0.705005	0.638742	0.541023	0.870392	0.862718	0.892336	0.815812	0.836794	0.792559	0.83766	0.772767	0.817759	0.866429	0.809756
Grsf1	Common MN genes	0.920765	0.97957	0.936655	0.761323	0.932764	0.428494	0.93244	0.888336	0.923792	0.826952	0.811486	0.846204	0.787584	0.884491	0.870106	0.834199	0.82241
Gsk3b	Common MN genes	0.980218	0.971354	0.962923	0.958167	0.97784	0.933845	0.987785	0.986596	0.984758	0.981289	0.981506	0.984534	0.97361	0.985615	0.983128	0.983777	0.98356
Gspt1	Common MN genes	0.553994	0.753756	0.880445	0.830397	0.561345	0.734083	0.905524	0.899254	0.947465	0.872377	0.792559	0.860588	0.86167	0.800022	0.849989	0.7626	0.801752
Gyg	Common MN genes	0.951789	0.787915	0.960653	0.93925	0.956221	0.428494	0.953519	0.95795	0.939358	0.824789	0.905256	0.86751	0.90915	0.792451	0.850963	0.89217	0.906554
Hacd3	Common MN genes	0.66555	0.821857	0.672252	0.829424	0.860339	0.688358	0.968976	0.974057	0.973408	0.719663	0.771901	0.708847	0.739347	0.659096	0.746161	0.763249	0.684945
Hbs1l	Common MN genes	0.940547	0.700465	0.618636	0.848881	0.532807	0.805967	0.77397	0.802184	0.735812	0.711659	0.722258	0.713498	0.746377	0.701817	0.697923	0.664612	0.731776
Hdac2	Common MN genes	0.816236	0.750081	0.734623	0.515944	0.748243	0.615501	0.978056	0.97957	0.983894	0.994051	0.992862	0.993511	0.99416	0.992537	0.993943	0.990591	0.992429
Hdgfl3	Common MN genes	0.936547	0.592585	0.822938	0.942925	0.988758	0.714625	0.902929	0.878283	0.875797	0.970366	0.95782	0.967013	0.976963	0.952736	0.96074	0.937162	0.962578
Hdlbp	Common MN genes	0.943682	0.940979	0.876338	0.961626	0.931467	0.840233	0.867474	0.864447	0.861961	0.954575	0.961713	0.961064	0.937378	0.963444	0.962578	0.960091	0.959766
Hectd1	Common MN genes	0.89893	0.719057	0.815263	0.830072	0.88812	0.808886	0.891363	0.888661	0.838396	0.909583	0.910015	0.921371	0.917802	0.915964	0.917045	0.923859	0.922561
Hectd4	Common MN genes	0.80294	0.830829	0.859907	0.90628	0.830072	0.836126	0.938493	0.939898	0.921414	0.917802	0.923318	0.912935	0.904067	0.924724	0.914125	0.912719	0.911746
Helz	Common MN genes	0.832991	0.692249	0.837207	0.780889	0.852556	0.840882	0.694411	0.702627	0.732461	0.859291	0.85172	0.853126	0.827493	0.890655	0.814839	0.856046	0.863292
Hif1a	Common MN genes	0.918495	0.586639	0.925846	0.938493	0.789536	0.73084	0.949195	0.923576	0.936007	0.944084	0.936189	0.935864	0.939433	0.9443	0.946571	0.940623	0.94257
Hint1	Common MN genes	0.875905	0.647065	0.721976	0.85007	0.726732	0.852016	0.995028	0.994595	0.993947	0.747458	0.700411	0.719771	0.832901	0.750919	0.758815	0.851828	0.792559
Hmgb3	Common MN genes	0.979462	0.98865	0.982056	0.987569	0.988001	0.975786	0.932224	0.93979	0.956978	0.994592	0.990374	0.990266	0.991888	0.994051	0.993078	0.987887	0.993294
Hmgcr	Common MN genes	0.821317	0.76208	0.857097	0.837747	0.772457	0.81202	0.95114	0.949303	0.952438	0.974151	0.964525	0.968851	0.974908	0.965607	0.95836	0.971014	0.96366
Nsg2	Common MN genes	0.981948	0.957086	0.973192	0.967247	0.960869	0.734948	0.916658	0.950276	0.938061	0.988103	0.989076	0.991131	0.994917	0.989185	0.989293	0.991239	0.993511
Hnrnpa2b1	Common MN genes	0.8972	0.909307	0.908442	0.926603	0.979462	0.959788	0.98865	0.986056	0.990704	0.99178	0.985615	0.987238	0.989833	0.991456	0.990807	0.985291	0.987454
Hnrnpa3	Common MN genes	0.972435	0.974705	0.99319	0.980218	0.995892	0.981191	0.775592	0.739055	0.842936	0.996972	0.994917	0.996539	0.996431	0.997296	0.997296	0.996106	0.996755
Hnrnpd	Common MN genes	0.958599	0.957518	0.953843	0.975354	0.972327	0.868771	0.947033	0.937304	0.947141	0.890331	0.775038	0.847069	0.783258	0.888925	0.884923	0.807052	0.882652
Hnrnpll	Common MN genes	0.888553	0.907361	0.828127	0.955032	0.854827	0.933737	0.785212	0.776349	0.776457	0.943435	0.930024	0.931538	0.935323	0.940731	0.935215	0.914233	0.937486
Hnrnpu	Common MN genes	0.995352	0.991677	0.994271	0.999027	0.994055	0.987461	0.971354	0.971138	0.974273	0.968311	0.969176	0.972312	0.954899	0.980857	0.97772	0.972961	0.974692
Hoxa5	Common MN genes	0.950384	0.91936	0.912334	0.83872	0.883796	0.973733	0.897957	0.929629	0.927575	0.897253	0.857668	0.909583	0.945706	0.82295	0.865239	0.824032	0.863076
Hoxa7	Common MN genes	0.974489	0.982596	0.959572	0.564696	0.525781	0.529456	0.789644	0.766404	0.840017	0.940299	0.928834	0.921047	0.941921	0.898983	0.906879	0.913909	0.923318
Hoxb7	Common MN genes	0.942168	0.899038	0.963139	0.788023	0.934061	0.721868	0.747919	0.76889	0.919036	0.956846	0.947329	0.962254	0.981073	0.954142	0.95955	0.943759	0.968094
Hoxb8	Common MN genes	0.937736	0.920333	0.995352	0.916766	0.989407	0.937196	0.630526	0.684034	0.819587	0.971231	0.980424	0.983452	0.98064	0.983993	0.985075	0.990158	0.983885
Hs6st1	Common MN genes	0.68144	0.661226	0.811804	0.552373	0.489461	0.801751	0.913415	0.900011	0.887255	0.782501	0.746809	0.802726	0.712849	0.791153	0.806727	0.780986	0.816569
Hsp90b1	Common MN genes	0.963896	0.974597	0.965301	0.937412	0.978597	0.862609	0.994595	0.993947	0.995136	0.986805	0.986913	0.983669	0.985832	0.990266	0.994268	0.985183	0.989617
Hspa12a	Common MN genes	0.987461	0.988866	0.961734	0.792455	0.700032	0.91201	0.982488	0.984326	0.974057	0.970149	0.979018	0.975233	0.963011	0.94138	0.926455	0.964417	0.942462
Hspa4	Common MN genes	0.970814	0.96422	0.966166	0.99146	0.99092	0.949627	0.993298	0.99092	0.98638	0.947112	0.952087	0.945057	0.947329	0.942137	0.944084	0.945274	0.939325
Hspa4l	Common MN genes	0.938817	0.989082	0.876013	0.93071	0.959572	0.938926	0.903254	0.896984	0.917847	0.884923	0.888168	0.866537	0.872269	0.818408	0.875081	0.811378	0.813974
Hspa5	Common MN genes	0.967031	0.977192	0.990163	0.965085	0.944114	0.753756	0.976867	0.979029	0.967787	0.978477	0.982371	0.977612	0.966472	0.982263	0.986264	0.979883	0.981397
Hspa9	Common MN genes	0.803373	0.890931	0.714517	0.971787	0.848233	0.533888	0.957842	0.96822	0.963572	0.950465	0.955332	0.951979	0.938027	0.95836	0.953493	0.959117	0.916288
Hspd1	Common MN genes	0.984002	0.983353	0.960869	0.972868	0.989515	0.960329	0.98184	0.981407	0.979245	0.983344	0.981722	0.979559	0.981722	0.977612	0.981506	0.981181	0.976314
Htatsf1	Common MN genes	0.749108	0.963355	0.917955	0.841098	0.831478	0.925305	0.835153	0.854286	0.819479	0.677482	0.690785	0.776985	0.808458	0.585659	0.677158	0.718365	0.695003
Hyou1	Common MN genes	0.723706	0.791914	0.881634	0.807048	0.742731	0.622095	0.669441	0.700141	0.752243	0.864482	0.844906	0.852477	0.790071	0.915856	0.866645	0.86459	0.868376
Id2	Common MN genes	0.985947	0.990812	0.881202	0.981191	0.966058	0.428494	0.844341	0.84953	0.864231	0.929591	0.940299	0.9244	0.925589	0.927644	0.95782	0.930997	0.939866
Ide	Common MN genes	0.907037	0.730624	0.897416	0.822938	0.770511	0.661874	0.862069	0.858286	0.837639	0.900606	0.898118	0.905364	0.908501	0.863725	0.883085	0.8886	0.873891
Idh1	Common MN genes	0.835585	0.808129	0.742298	0.310237	0.821533	0.702843	0.994271	0.994811	0.994055	0.971339	0.980316	0.978693	0.976206	0.969176	0.9695	0.97599	0.972637
Ifrd1	Common MN genes	0.914496	0.854394	0.947573	0.852773	0.889634	0.870609	0.74846	0.721111	0.698519	0.94549	0.888817	0.912611	0.937703	0.913152	0.929807	0.856911	0.909258
Ik	Common MN genes	0.932332	0.838828	0.887688	0.981948	0.962707	0.836666	0.935899	0.942493	0.889093	0.86697	0.810945	0.784015	0.771361	0.914666	0.884815	0.83355	0.888276
Immt	Common MN genes	0.956221	0.960977	0.84953	0.978813	0.928764	0.929197	0.84326	0.853097	0.837747	0.906662	0.927212	0.922237	0.914125	0.92905	0.906013	0.931538	0.923535
Inpp4a	Common MN genes	0.910604	0.840233	0.737758	0.706194	0.876662	0.887147	0.829748	0.830829	0.818614	0.883193	0.907311	0.886546	0.875946	0.874757	0.877893	0.901471	0.881462
Insig1	Common MN genes	0.745649	0.523727	0.93298	0.891904	0.829424	0.428494	0.853962	0.873635	0.860664	0.929375	0.926887	0.904932	0.912503	0.844365	0.835821	0.837768	0.81419
Ip6k2	Common MN genes	0.870609	0.861637	0.624365	0.89439	0.903794	0.775916	0.800022	0.800454	0.803156	0.91791	0.895414	0.846745	0.816137	0.917262	0.89271	0.859615	0.877461
Isl1	Common MN genes	0.952113	0.883688	0.92163	0.489569	0.629337	0.485245	0.988001	0.98411	0.985623	0.908393	0.944841	0.82944	0.820787	0.711875	0.66353	0.825438	0.642764
Itfg1	Common MN genes	0.819479	0.455843	0.834504	0.788888	0.804021	0.516377	0.864771	0.849854	0.851692	0.96074	0.972961	0.974043	0.979018	0.909907	0.938244	0.959442	0.95252
Itgb1	Common MN genes	0.957518	0.949195	0.920441	0.924224	0.838288	0.728137	0.97957	0.975786	0.974489	0.940515	0.945274	0.929267	0.915964	0.944084	0.954142	0.916721	0.918668
Itm2b	Common MN genes	0.847152	0.963572	0.913739	0.967679	0.745865	0.879689	0.972327	0.970273	0.959572	0.976639	0.975341	0.97361	0.984101	0.9748	0.979342	0.964958	0.978477
Iws1	Common MN genes	0.887904	0.691493	0.899903	0.815263	0.867474	0.857961	0.741974	0.767809	0.739704	0.929483	0.917694	0.932728	0.921263	0.953061	0.948302	0.94138	0.938892
Jakmip2	Common MN genes	0.886931	0.645768	0.687601	0.694195	0.647281	0.679818	0.871906	0.887039	0.872662	0.891196	0.880489	0.887843	0.881787	0.883734	0.897577	0.880381	0.879407
Jmjd1c	Common MN genes	0.719382	0.898065	0.676576	0.723057	0.803481	0.685439	0.873095	0.858826	0.877743	0.797967	0.806619	0.807376	0.791694	0.872269	0.850314	0.853666	0.84642
Jun	Common MN genes	0.991352	0.985515	0.987028	0.997406	0.992649	0.983137	0.951465	0.952978	0.938601	0.829007	0.85464	0.748107	0.563487	0.77547	0.827601	0.747891	0.621242
Kars	Common MN genes	0.853421	0.717004	0.796563	0.757648	0.689115	0.654416	0.862501	0.872987	0.87223	0.933917	0.949816	0.945814	0.934674	0.945923	0.945057	0.95955	0.946355
Kcnq3	Common MN genes	0.888228	0.590747	0.743811	0.718193	0.668901	0.492271	0.8518	0.819371	0.763701	0.711118	0.666234	0.79602	0.718148	0.702682	0.630867	0.661367	0.724962
Kdelr2	Common MN genes	0.978165	0.996433	0.962491	0.945736	0.808021	0.620582	0.970165	0.938601	0.965085	0.955008	0.957928	0.963227	0.964093	0.927536	0.962687	0.969284	0.961064
Kdm1a	Common MN genes	0.808021	0.904659	0.791266	0.781105	0.812561	0.71268	0.916333	0.919144	0.896119	0.952953	0.96366	0.961497	0.938244	0.96777	0.957171	0.96485	0.961929
D630045J12Rik	Common MN genes	0.930494	0.873743	0.829316	0.801319	0.936547	0.770295	0.736245	0.78078	0.8291	0.893359	0.898659	0.917478	0.897685	0.925049	0.924941	0.944733	0.93846
D430041D05Rik	Common MN genes	0.789212	0.740893	0.7263	0.854178	0.786618	0.716895	0.762188	0.750622	0.733326	0.687649	0.686892	0.700627	0.728856	0.652823	0.689704	0.691434	0.726368
Kidins220	Common MN genes	0.972003	0.957302	0.948654	0.961734	0.919792	0.972976	0.977408	0.980002	0.979894	0.992429	0.99005	0.992862	0.995674	0.986913	0.988968	0.987995	0.991131
Kif2a	Common MN genes	0.871581	0.871473	0.956761	0.779159	0.761755	0.822938	0.982056	0.979786	0.980867	0.973935	0.9748	0.978261	0.980965	0.972312	0.974259	0.97772	0.976422
Kif3a	Common MN genes	0.859475	0.780997	0.916441	0.851151	0.866825	0.620365	0.984434	0.984434	0.980326	0.908501	0.918235	0.925806	0.903526	0.916288	0.87573	0.911205	0.90093
Kif3b	Common MN genes	0.956545	0.941087	0.991352	0.925197	0.990488	0.973516	0.869203	0.822938	0.824451	0.773307	0.739779	0.709712	0.732533	0.740969	0.719446	0.691759	0.740536
Kif5b	Common MN genes	0.845638	0.764026	0.8745	0.879581	0.81148	0.851151	0.919468	0.903686	0.913631	0.966148	0.954034	0.956197	0.955008	0.965823	0.961713	0.95782	0.965499
Kif5c	Common MN genes	0.945411	0.958491	0.96195	0.940547	0.95914	0.884121	0.995136	0.99373	0.994595	0.977504	0.981938	0.979775	0.979126	0.967662	0.968851	0.973827	0.974151
Kifap3	Common MN genes	0.787482	0.79786	0.927251	0.843152	0.726408	0.715058	0.990812	0.988434	0.988326	0.956954	0.952412	0.947869	0.944192	0.944949	0.945814	0.934999	0.948086
Klf7	Common MN genes	0.872338	0.856772	0.874284	0.677656	0.822289	0.644903	0.940763	0.943898	0.916874	0.902444	0.90915	0.903526	0.892061	0.817975	0.84934	0.864157	0.86048
Klhl2	Common MN genes	0.70868	0.787374	0.653227	0.456383	0.594963	0.428494	0.766944	0.728786	0.726948	0.940731	0.901038	0.897145	0.899849	0.916072	0.922561	0.845555	0.903634
Kmt2e	Common MN genes	0.904335	0.864663	0.873743	0.865096	0.892336	0.795157	0.937845	0.920873	0.948006	0.956197	0.946896	0.938027	0.95663	0.958252	0.957063	0.93316	0.94722
Kpna4	Common MN genes	0.977624	0.944438	0.938926	0.909091	0.922711	0.962815	0.922711	0.902173	0.937736	0.946571	0.936946	0.949492	0.963552	0.935107	0.948951	0.93846	0.951222
Kpnb1	Common MN genes	0.894174	0.787699	0.759161	0.92163	0.846827	0.926386	0.944222	0.933521	0.921522	0.856803	0.85053	0.852152	0.830089	0.904716	0.888384	0.869241	0.876487
Kras	Common MN genes	0.742622	0.807264	0.691493	0.896768	0.732461	0.674738	0.985299	0.970922	0.9733	0.775254	0.663963	0.765845	0.795912	0.501298	0.627082	0.553645	0.542505
Ktn1	Common MN genes	0.92109	0.913307	0.934061	0.958383	0.836882	0.846071	0.856988	0.895038	0.895255	0.913909	0.903958	0.886437	0.865672	0.943111	0.911529	0.897902	0.918451
Lamp1	Common MN genes	0.909307	0.905632	0.893093	0.79786	0.610312	0.883796	0.989623	0.976327	0.983569	0.91088	0.95425	0.941705	0.947545	0.907419	0.916721	0.954899	0.933809
Lancl1	Common MN genes	0.481678	0.948438	0.815371	0.667387	0.716679	0.428494	0.803265	0.781753	0.793752	0.674562	0.729505	0.790828	0.708198	0.748648	0.724205	0.756543	0.770712
Larp1	Common MN genes	0.838288	0.636039	0.844017	0.933305	0.899687	0.866393	0.940655	0.954167	0.960869	0.815271	0.817002	0.785421	0.723881	0.872485	0.792883	0.809215	0.802726
Ldha	Common MN genes	0.991677	0.981407	0.99546	0.981299	0.964869	0.977408	0.988866	0.992433	0.991244	0.712524	0.914125	0.844798	0.934891	0.659853	0.88276	0.826303	0.901363
Lhx1	Common MN genes	0.925089	0.801211	0.640255	0.877635	0.909523	0.724787	0.765755	0.848449	0.811588	0.982587	0.974475	0.982803	0.983885	0.981614	0.981722	0.98183	0.984858
Lmnb1	Common MN genes	0.713977	0.952762	0.666523	0.722408	0.784131	0.758837	0.655821	0.72857	0.734191	0.842959	0.677374	0.772767	0.86578	0.782933	0.812784	0.750703	0.750162
Lnpk	Common MN genes	0.900984	0.85407	0.838288	0.456275	0.781213	0.60934	0.887796	0.839044	0.85461	0.878218	0.849665	0.848799	0.869241	0.842526	0.840363	0.823924	0.858425
Lrp11	Common MN genes	0.941304	0.497027	0.796779	0.882175	0.441682	0.896227	0.978489	0.978489	0.977192	0.94138	0.9443	0.950465	0.933052	0.916937	0.928726	0.956305	0.948626
Lrrc49	Common MN genes	0.849097	0.609556	0.852016	0.900119	0.223976	0.503946	0.802508	0.836991	0.79159	0.824356	0.85345	0.833117	0.798724	0.731019	0.813325	0.718257	0.726801
Lrrn1	Common MN genes	0.841098	0.900011	0.883688	0.850395	0.937196	0.86942	0.776457	0.77851	0.825749	0.976855	0.979342	0.984858	0.98767	0.983669	0.986048	0.990699	0.987995
Lrrn3	Common MN genes	0.818074	0.752675	0.937196	0.767701	0.916766	0.507945	0.983137	0.987893	0.984326	0.769306	0.749189	0.789098	0.863617	0.612481	0.700735	0.71101	0.704521
Lrrtm2	Common MN genes	0.944763	0.810291	0.952762	0.617555	0.223976	0.601124	0.931143	0.920982	0.911145	0.759247	0.842418	0.674238	0.711118	0.723232	0.653688	0.755678	0.714579
Lsamp	Common MN genes	0.911793	0.682521	0.859042	0.708464	0.796238	0.84726	0.934385	0.925413	0.92844	0.887519	0.900714	0.889682	0.82533	0.914341	0.877569	0.868159	0.898226
Lsm12	Common MN genes	0.536266	0.848665	0.782186	0.840125	0.867041	0.649551	0.920333	0.90801	0.876662	0.876812	0.844473	0.856587	0.816245	0.931971	0.914666	0.882544	0.885572
Lsm14b	Common MN genes	0.970165	0.927467	0.794509	0.846719	0.848341	0.801967	0.919252	0.903902	0.927792	0.889682	0.868267	0.884599	0.823383	0.911205	0.851612	0.891304	0.909366
Luc7l2	Common MN genes	0.873743	0.874932	0.958275	0.951573	0.965625	0.979029	0.926927	0.920765	0.943357	0.91207	0.844581	0.873026	0.879948	0.886978	0.903742	0.846096	0.872269
Luc7l3	Common MN genes	0.97276	0.960112	0.97103	0.914604	0.879581	0.630959	0.939466	0.921414	0.926711	0.971988	0.959658	0.965823	0.969284	0.971555	0.969717	0.964093	0.970582
Lypla1	Common MN genes	0.828559	0.912658	0.939574	0.868339	0.862934	0.837639	0.78478	0.738299	0.660361	0.875297	0.872594	0.877893	0.911097	0.797967	0.862211	0.75438	0.853883
Madd	Common MN genes	0.911361	0.767052	0.849962	0.906172	0.89493	0.847152	0.745217	0.750946	0.652038	0.89217	0.920614	0.893576	0.887952	0.92321	0.887303	0.881354	0.900822
Maea	Common MN genes	0.898497	0.644471	0.581343	0.519836	0.790293	0.428494	0.894066	0.899362	0.776132	0.918235	0.912827	0.920939	0.943976	0.870647	0.910448	0.924724	0.904824
Maf1	Common MN genes	0.88585	0.870825	0.690304	0.542212	0.903146	0.573452	0.649227	0.670738	0.802292	0.926671	0.943219	0.930889	0.85756	0.959766	0.932944	0.946788	0.940515
Mafb	Common MN genes	0.942277	0.902281	0.949411	0.732569	0.559075	0.606853	0.962599	0.969949	0.968003	0.855072	0.830738	0.720852	0.700735	0.749081	0.67705	0.555267	0.681592
Magi2	Common MN genes	0.655389	0.720246	0.882823	0.640687	0.708248	0.771592	0.804237	0.819695	0.835045	0.738265	0.787908	0.762167	0.792992	0.77904	0.764655	0.754921	0.778607
Map1a	Common MN genes	0.983569	0.975786	0.986164	0.987137	0.985947	0.989731	0.951249	0.966274	0.952113	0.956522	0.956089	0.94841	0.943435	0.957171	0.948626	0.945706	0.951655
Map1b	Common MN genes	0.997622	0.994703	0.996325	0.99319	0.991028	0.978165	0.999892	0.999892	0.999892	0.998378	0.99881	0.998378	0.998594	0.996539	0.996539	0.99708	0.99708
Map1lc3a	Common MN genes	0.845098	0.885418	0.74392	0.662739	0.754081	0.532591	0.858069	0.850178	0.930062	0.855397	0.840688	0.894982	0.911313	0.630867	0.683431	0.709496	0.74443
Map1lc3b	Common MN genes	0.830397	0.855691	0.940547	0.865636	0.696681	0.846719	0.797319	0.768782	0.806724	0.930889	0.925265	0.90504	0.896928	0.902552	0.916829	0.901795	0.924832
Map2	Common MN genes	0.957734	0.88131	0.9279	0.900551	0.920117	0.869852	0.990271	0.990271	0.991028	0.98594	0.984101	0.986372	0.987021	0.986372	0.984534	0.985724	0.98713
Map2k1	Common MN genes	0.834288	0.950924	0.512269	0.821857	0.878283	0.745973	0.915685	0.887688	0.899578	0.777093	0.790071	0.727558	0.719446	0.623945	0.739239	0.717499	0.68051
Map3k7	Common MN genes	0.807913	0.669657	0.647281	0.587072	0.738407	0.743379	0.764782	0.803265	0.816344	0.919749	0.928293	0.929375	0.920939	0.893251	0.915423	0.933377	0.897469
Map6	Common MN genes	0.842828	0.809858	0.666739	0.880013	0.962599	0.756459	0.9546	0.956437	0.958275	0.991672	0.993511	0.993619	0.991131	0.990915	0.987021	0.989076	0.988427
Map7d2	Common MN genes	0.724354	0.800562	0.823154	0.776457	0.397146	0.607718	0.908442	0.880121	0.88131	0.960091	0.944192	0.911962	0.935215	0.898551	0.88157	0.876055	0.908717
Mapk10	Common MN genes	0.851584	0.738623	0.745433	0.888661	0.736677	0.783267	0.836774	0.872662	0.846503	0.916613	0.923102	0.930997	0.926238	0.911746	0.909799	0.92321	0.921263
Mapk1	Common MN genes	0.911253	0.960437	0.941628	0.953302	0.957086	0.98184	0.945519	0.933737	0.920225	0.959766	0.973178	0.965066	0.975557	0.933593	0.954791	0.958685	0.941813
Mapk6	Common MN genes	0.91028	0.815588	0.825208	0.962274	0.855367	0.892336	0.960221	0.961518	0.953194	0.986048	0.983344	0.987454	0.988103	0.98064	0.982587	0.984966	0.98302
Mapk8	Common MN genes	0.964977	0.958707	0.898606	0.900335	0.960112	0.900011	0.904767	0.878716	0.885526	0.876703	0.873891	0.898226	0.888168	0.873242	0.906338	0.890547	0.869673
Mapk9	Common MN genes	0.849962	0.622635	0.71495	0.580153	0.555832	0.611501	0.970814	0.968544	0.969625	0.679213	0.748324	0.782501	0.810296	0.690893	0.693705	0.724854	0.691218
Mapre1	Common MN genes	0.855691	0.96595	0.780024	0.833423	0.839801	0.737866	0.961518	0.958275	0.965301	0.991023	0.991023	0.989185	0.991023	0.985291	0.986372	0.986913	0.986048
Mapre2	Common MN genes	0.812453	0.777754	0.897741	0.883796	0.86088	0.960545	0.959031	0.96876	0.966598	0.98475	0.987238	0.989076	0.985183	0.979451	0.980857	0.983885	0.983128
Mapt	Common MN genes	0.805643	0.862177	0.804129	0.866177	0.842828	0.985731	0.984975	0.988542	0.984975	0.867727	0.820138	0.789206	0.796669	0.864374	0.756976	0.774822	0.792343
Marchf6	Common MN genes	0.848016	0.689007	0.745649	0.841531	0.843909	0.719057	0.974705	0.972219	0.976543	0.895198	0.906013	0.918884	0.905256	0.850205	0.86751	0.902228	0.866753
Marcks	Common MN genes	0.997514	0.997622	0.996	0.98638	0.990596	0.994055	0.994487	0.992217	0.994271	0.963768	0.968202	0.968311	0.953061	0.956738	0.967121	0.980748	0.964742
Mark1	Common MN genes	0.929089	0.984218	0.789536	0.811264	0.875473	0.875041	0.875689	0.848016	0.803265	0.936405	0.936513	0.945382	0.935432	0.945382	0.932403	0.941813	0.94138
Mark3	Common MN genes	0.610637	0.707275	0.94833	0.892985	0.901848	0.945195	0.849314	0.848233	0.853313	0.919208	0.925806	0.939001	0.93262	0.926995	0.942245	0.927212	0.937703
Mbd5	Common MN genes	0.877094	0.550643	0.850286	0.820992	0.603178	0.495946	0.737758	0.736461	0.689655	0.834199	0.775687	0.811378	0.828358	0.866212	0.85345	0.854424	0.876379
Mcts1	Common MN genes	0.892444	0.933521	0.620149	0.915577	0.672792	0.887364	0.960761	0.952221	0.972435	0.747783	0.829223	0.697274	0.802834	0.670344	0.764979	0.683214	0.703872
Mdh1	Common MN genes	0.9733	0.964869	0.973841	0.975786	0.972976	0.873419	0.985191	0.991568	0.988434	0.963227	0.944733	0.944408	0.948951	0.932079	0.948843	0.921804	0.941272
Mdh2	Common MN genes	0.811696	0.948114	0.953194	0.808129	0.792887	0.556913	0.959356	0.964544	0.972868	0.976314	0.978369	0.976314	0.973935	0.978477	0.978153	0.973935	0.979342
Med14	Common MN genes	0.778727	0.692358	0.738515	0.509783	0.795157	0.939574	0.902173	0.893417	0.908659	0.820138	0.816786	0.797642	0.809539	0.861021	0.837551	0.861562	0.832684
Meis2	Common MN genes	0.709004	0.869203	0.837099	0.947681	0.735596	0.950924	0.850503	0.863042	0.863258	0.980532	0.971123	0.979126	0.966148	0.978153	0.981397	0.976747	0.98064
Metap2	Common MN genes	0.904227	0.88812	0.796022	0.927359	0.868663	0.894714	0.824343	0.843909	0.841855	0.915315	0.873026	0.877244	0.818841	0.951871	0.918776	0.876271	0.941596
Mff	Common MN genes	0.941196	0.91255	0.522754	0.613447	0.56956	0.728029	0.864555	0.84326	0.875041	0.813325	0.792667	0.71631	0.815596	0.760221	0.782501	0.70982	0.73859
Mfn1	Common MN genes	0.703816	0.656037	0.943682	0.582748	0.3044	0.616906	0.828235	0.865744	0.864663	0.911421	0.919425	0.941272	0.934134	0.922453	0.931646	0.933268	0.933052
Oga	Common MN genes	0.859799	0.832883	0.895363	0.742947	0.91709	0.428494	0.93979	0.936655	0.953735	0.895414	0.909799	0.932079	0.918127	0.928834	0.912395	0.937054	0.932079
Mgst3	Common MN genes	0.989731	0.992433	0.99146	0.990271	0.990812	0.970922	0.981083	0.945303	0.911901	0.827277	0.784015	0.67759	0.648497	0.835172	0.83355	0.676617	0.812892
Mia3	Common MN genes	0.836342	0.726516	0.894714	0.846935	0.857637	0.686953	0.893201	0.900335	0.907253	0.820463	0.785529	0.790612	0.759247	0.823924	0.793424	0.796128	0.772442
Mib1	Common MN genes	0.850503	0.671171	0.783699	0.842395	0.709437	0.644795	0.938817	0.912874	0.920873	0.95544	0.940839	0.958577	0.963119	0.96366	0.958793	0.963011	0.962254
Mob4	Common MN genes	0.986488	0.987893	0.992866	0.983245	0.594098	0.428494	0.928116	0.937628	0.922711	0.917262	0.926022	0.914774	0.94257	0.859074	0.90623	0.901687	0.874216
Mpc2	Common MN genes	0.961193	0.705762	0.985191	0.787807	0.93925	0.848773	0.796995	0.726084	0.649443	0.831495	0.875946	0.862535	0.850854	0.81538	0.853666	0.877028	0.890223
Mpp6	Common MN genes	0.766728	0.928332	0.464707	0.785104	0.513782	0.838828	0.787699	0.803697	0.811047	0.721609	0.717499	0.694138	0.731451	0.613022	0.685377	0.694679	0.740645
Mrpl18	Common MN genes	0.824235	0.629554	0.702302	0.816236	0.899146	0.428494	0.885526	0.942277	0.86823	0.742375	0.73621	0.753082	0.715228	0.842635	0.810296	0.818732	0.759031
Mtpn	Common MN genes	0.896552	0.956653	0.958167	0.87396	0.955897	0.888877	0.996973	0.995136	0.995028	0.941921	0.91737	0.945274	0.96539	0.718689	0.910664	0.827385	0.872702
Mtss1	Common MN genes	0.710518	0.775808	0.776024	0.762945	0.905524	0.682088	0.890282	0.885202	0.911469	0.805429	0.877677	0.864698	0.853666	0.704953	0.740536	0.852369	0.788341
Mtx2	Common MN genes	0.812777	0.557669	0.902713	0.46222	0.396822	0.950168	0.942277	0.922279	0.898281	0.972961	0.966688	0.967662	0.975881	0.926563	0.965715	0.94722	0.959442
Mycbp2	Common MN genes	0.906605	0.918711	0.875905	0.929954	0.922495	0.930818	0.978381	0.978813	0.976651	0.910448	0.91791	0.908934	0.907203	0.902985	0.908501	0.910123	0.912503
Mydgf	Common MN genes	0.870933	0.867041	0.932764	0.710085	0.582099	0.735704	0.69279	0.707167	0.7984	0.925049	0.933809	0.895414	0.925806	0.934674	0.929591	0.936729	0.92851
Naa50	Common MN genes	0.54232	0.937196	0.936439	0.901092	0.85915	0.498325	0.861312	0.907578	0.910604	0.832144	0.8435	0.811486	0.798832	0.886329	0.837335	0.80186	0.797426
Nae1	Common MN genes	0.800994	0.983245	0.97049	0.846395	0.931251	0.718301	0.734191	0.73365	0.743595	0.887411	0.893143	0.886113	0.884815	0.875406	0.86697	0.869998	0.908934
Nap1l1	Common MN genes	0.889634	0.87396	0.931359	0.964328	0.941628	0.891363	0.917306	0.912658	0.920009	0.985724	0.978802	0.981289	0.987346	0.981397	0.986697	0.979991	0.982587
Nap1l4	Common MN genes	0.93525	0.848233	0.912982	0.92617	0.907253	0.919684	0.875473	0.892012	0.881526	0.967121	0.94549	0.946031	0.959983	0.961821	0.967445	0.939433	0.951114
Napb	Common MN genes	0.690412	0.942168	0.913955	0.920225	0.949087	0.774835	0.932656	0.9506	0.958707	0.68051	0.767359	0.720203	0.656608	0.681484	0.646334	0.7321	0.630543
Nars	Common MN genes	0.859042	0.749216	0.885634	0.608907	0.818722	0.756134	0.960004	0.968328	0.978381	0.906879	0.905797	0.919208	0.921588	0.882219	0.86578	0.898983	0.895306
Nbr1	Common MN genes	0.683602	0.861096	0.745865	0.642849	0.776781	0.691493	0.769538	0.823911	0.783915	0.880813	0.856587	0.891737	0.890439	0.909474	0.889358	0.918235	0.887952
Ncald	Common MN genes	0.774727	0.905524	0.797535	0.706302	0.764026	0.868447	0.826181	0.835802	0.746082	0.939325	0.926238	0.92905	0.934566	0.919316	0.927644	0.906662	0.940407
Ncam1	Common MN genes	0.998487	0.994487	0.997406	0.990596	0.992433	0.993514	0.990596	0.991785	0.992649	0.993727	0.994484	0.994592	0.993403	0.994376	0.992429	0.994809	0.994051
Ncl	Common MN genes	0.990488	0.991785	0.986596	0.995136	0.993839	0.98238	0.946168	0.941952	0.948114	0.991888	0.985291	0.986697	0.980857	0.995241	0.993186	0.988752	0.990266
Ncoa6	Common MN genes	0.952329	0.813642	0.829856	0.864555	0.8251	0.842071	0.86542	0.87396	0.847368	0.815704	0.804997	0.789747	0.800995	0.850638	0.832468	0.820247	0.868267
Ncs1	Common MN genes	0.768133	0.667171	0.915469	0.559075	0.838396	0.66836	0.877959	0.880553	0.873635	0.738806	0.775903	0.829548	0.692191	0.746809	0.725287	0.744538	0.677482
Ncstn	Common MN genes	0.919468	0.915361	0.703275	0.817101	0.950168	0.774511	0.745433	0.717868	0.738623	0.736643	0.743132	0.75676	0.7374	0.661475	0.672723	0.792343	0.736535
Ndfip1	Common MN genes	0.630526	0.863582	0.976975	0.878067	0.69506	0.895255	0.991352	0.990379	0.990812	0.9748	0.96777	0.971772	0.976422	0.964525	0.972096	0.962687	0.973394
Ndrg3	Common MN genes	0.854827	0.949411	0.856664	0.838288	0.865204	0.486974	0.817533	0.789428	0.760026	0.76141	0.857776	0.81127	0.792018	0.751893	0.757409	0.795155	0.776336
Ndufa10	Common MN genes	0.895579	0.714301	0.8705	0.898497	0.895038	0.848881	0.886066	0.884121	0.868555	0.939974	0.95133	0.957711	0.938568	0.939866	0.949708	0.95425	0.944192
Ndufa12	Common MN genes	0.932548	0.781537	0.902497	0.813642	0.642633	0.529997	0.717436	0.656794	0.805643	0.92613	0.933268	0.917153	0.927644	0.911313	0.916613	0.952304	0.921912
Ndufa2	Common MN genes	0.950924	0.670846	0.860664	0.911253	0.537347	0.95568	0.957734	0.93471	0.962923	0.9244	0.927428	0.907852	0.905364	0.961497	0.9496	0.951438	0.931862
Ndufa4	Common MN genes	0.984542	0.958059	0.979786	0.991244	0.949735	0.712572	0.99146	0.992001	0.99092	0.987454	0.977179	0.978153	0.974259	0.986589	0.984966	0.97891	0.988103
Ndufa8	Common MN genes	0.683386	0.821641	0.654308	0.679926	0.904767	0.629554	0.956545	0.975462	0.963788	0.905905	0.919316	0.862103	0.859615	0.901471	0.894657	0.906338	0.876163
Ndufa9	Common MN genes	0.937196	0.961301	0.58318	0.189925	0.223976	0.428494	0.863582	0.825965	0.816993	0.915639	0.926563	0.915315	0.929916	0.898443	0.93143	0.929375	0.899849
Ndufb1-ps	Common MN genes	0.722408	0.864555	0.639498	0.532267	0.953627	0.428494	0.949627	0.951032	0.964652	0.962578	0.971339	0.963011	0.96485	0.954359	0.961821	0.971555	0.955873
Ndufb3	Common MN genes	0.978056	0.821749	0.970922	0.947465	0.617014	0.834829	0.96368	0.955897	0.975246	0.846636	0.840472	0.848475	0.835388	0.883301	0.807484	0.932944	0.859074
Ndufb5	Common MN genes	0.822289	0.51962	0.917522	0.759269	0.966166	0.98638	0.767376	0.756351	0.830937	0.879624	0.921696	0.93554	0.896604	0.909691	0.873567	0.928185	0.905797
Ndufb8	Common MN genes	0.960221	0.950816	0.984326	0.929413	0.93471	0.93752	0.797427	0.855691	0.864015	0.900389	0.932836	0.900389	0.912178	0.914125	0.897794	0.948194	0.909799
Ndufb9	Common MN genes	0.889525	0.915469	0.893525	0.970814	0.548265	0.950276	0.963139	0.980975	0.957302	0.898551	0.911746	0.908825	0.914558	0.856695	0.880381	0.867402	0.910448
Ndufc2	Common MN genes	0.565236	0.771268	0.943898	0.342882	0.624041	0.428494	0.993839	0.994055	0.996541	0.789314	0.75849	0.799156	0.72215	0.691975	0.668073	0.817651	0.823167
Ndufs4	Common MN genes	0.941087	0.772349	0.816128	0.831153	0.581883	0.825208	0.91882	0.905091	0.772025	0.896928	0.857993	0.904716	0.913692	0.931322	0.859507	0.93608	0.919749
Ndufv2	Common MN genes	0.695276	0.877851	0.909307	0.693655	0.551832	0.850611	0.935575	0.960112	0.951681	0.941488	0.911205	0.933052	0.902336	0.93608	0.951222	0.91207	0.943219
Nefl	Common MN genes	0.999892	0.999892	0.999784	0.999568	0.996433	0.998379	1	1	1	0.977179	0.980857	0.971231	0.890655	0.959875	0.920831	0.959875	0.914341
Nefm	Common MN genes	1	1	1	0.999784	0.999027	0.99946	0.999676	0.999568	0.999568	0.985832	0.988752	0.977179	0.951763	0.975773	0.943219	0.958577	0.93143
Nek1	Common MN genes	0.707923	0.915252	0.921738	0.879364	0.885094	0.83872	0.92844	0.919036	0.918171	0.870863	0.870971	0.813757	0.839282	0.848799	0.80478	0.794289	0.837443
Nell2	Common MN genes	0.996649	0.979786	0.991568	0.94379	0.952546	0.793644	0.972544	0.974381	0.960004	0.993078	0.994592	0.992105	0.991997	0.988752	0.98713	0.989942	0.986372
Nf1	Common MN genes	0.798833	0.649659	0.683386	0.760134	0.831694	0.759377	0.936007	0.939142	0.943249	0.880705	0.897902	0.909474	0.901363	0.888276	0.905905	0.915207	0.897577
Nfia	Common MN genes	0.766512	0.715923	0.622419	0.546752	0.762296	0.826721	0.932872	0.939466	0.938385	0.804132	0.876703	0.831603	0.851828	0.900498	0.90385	0.897037	0.895522
Nifk	Common MN genes	0.691493	0.656902	0.939142	0.806724	0.884985	0.590855	0.850935	0.811588	0.876338	0.714904	0.77666	0.755786	0.568246	0.792992	0.704305	0.729505	0.699329
Nipsnap2	Common MN genes	0.978705	0.921198	0.93979	0.855151	0.962058	0.871149	0.731705	0.799697	0.82737	0.839714	0.879948	0.853775	0.887843	0.828899	0.860048	0.849232	0.83355
Nkain2	Common MN genes	0.89212	0.520809	0.891147	0.326451	0.270998	0.711923	0.751162	0.823587	0.807913	0.67294	0.771793	0.701925	0.765088	0.593878	0.614536	0.805213	0.665801
Nktr	Common MN genes	0.919901	0.931899	0.919252	0.760242	0.895903	0.647389	0.873635	0.869744	0.885202	0.795912	0.815271	0.81419	0.806944	0.839282	0.847826	0.788557	0.827709
Nlk	Common MN genes	0.758837	0.612907	0.770187	0.642525	0.323424	0.54286	0.921522	0.91936	0.922603	0.756003	0.816461	0.814731	0.743673	0.778607	0.683971	0.857884	0.743781
Nmnat2	Common MN genes	0.921198	0.902389	0.9733	0.935034	0.884445	0.872554	0.895795	0.882283	0.903254	0.819814	0.878109	0.836794	0.804348	0.819381	0.774713	0.860913	0.849232
Nono	Common MN genes	0.943466	0.958923	0.951681	0.969733	0.968652	0.977732	0.889309	0.881634	0.891147	0.946247	0.908934	0.922777	0.890872	0.968743	0.955008	0.946355	0.95425
Nop14	Common MN genes	0.659712	0.866069	0.792022	0.830289	0.899038	0.50654	0.652794	0.730299	0.744568	0.686892	0.704305	0.762059	0.687757	0.712632	0.721285	0.69403	0.708955
Nop58	Common MN genes	0.815047	0.917631	0.98238	0.811047	0.940763	0.895038	0.814074	0.776781	0.748135	0.870755	0.83939	0.897794	0.813865	0.915747	0.89217	0.878975	0.860048
Nova1	Common MN genes	0.895795	0.934494	0.926603	0.936764	0.947033	0.971787	0.984218	0.98692	0.986812	0.991239	0.988644	0.990482	0.9947	0.988968	0.988536	0.986264	0.989725
Npm1	Common MN genes	0.994595	0.994271	0.983677	0.992974	0.99773	0.987245	0.968544	0.97557	0.968652	0.997296	0.99297	0.993727	0.993835	0.997837	0.998161	0.993943	0.996972
Nptn	Common MN genes	0.841206	0.612582	0.857529	0.907578	0.584045	0.58091	0.970706	0.971354	0.974597	0.973286	0.970906	0.966796	0.972421	0.946247	0.960848	0.949816	0.955765
Nr2f2	Common MN genes	0.984326	0.992541	0.973408	0.981732	0.971354	0.961518	0.923468	0.922711	0.942925	0.943759	0.930889	0.922128	0.900714	0.825438	0.84058	0.828034	0.816353
Nrp2	Common MN genes	0.941628	0.911793	0.832991	0.911361	0.845746	0.777213	0.991893	0.988326	0.991677	0.744538	0.805862	0.723772	0.720203	0.739888	0.555592	0.753623	0.717175
Nrxn1	Common MN genes	0.883688	0.797211	0.814723	0.884013	0.923035	0.707815	0.95968	0.96141	0.95968	0.973718	0.970474	0.974151	0.978693	0.965066	0.963984	0.960848	0.96658
Nsdhl	Common MN genes	0.905956	0.86142	0.807264	0.624149	0.456815	0.428494	0.877527	0.898065	0.914063	0.835172	0.848042	0.833333	0.744538	0.803374	0.712957	0.70398	0.746161
Nsf	Common MN genes	0.699168	0.608907	0.912766	0.821749	0.538644	0.684467	0.904875	0.927792	0.926386	0.807484	0.75676	0.806944	0.864374	0.832468	0.793532	0.78369	0.820571
Nsfl1c	Common MN genes	0.757648	0.80694	0.847584	0.726192	0.877419	0.577451	0.735056	0.804345	0.773754	0.827493	0.834631	0.773632	0.747675	0.780662	0.81419	0.841445	0.837011
Nsg1	Common MN genes	0.91082	0.757972	0.92563	0.859367	0.685439	0.951249	0.949951	0.969841	0.951357	0.984966	0.982479	0.984101	0.990699	0.970257	0.980748	0.973502	0.9801
Nt5dc2	Common MN genes	0.964544	0.737326	0.889309	0.965625	0.622203	0.855691	0.777321	0.787158	0.70133	0.854856	0.939217	0.895198	0.884058	0.894549	0.901363	0.922669	0.902661
Nucks1	Common MN genes	0.958059	0.900227	0.976003	0.986272	0.978921	0.962382	0.938926	0.942168	0.944114	0.933809	0.91207	0.92148	0.920074	0.939109	0.95252	0.926887	0.92905
Nup153	Common MN genes	0.85915	0.755162	0.648038	0.803913	0.622743	0.63885	0.889417	0.892768	0.895471	0.68289	0.721609	0.703547	0.71631	0.763141	0.71804	0.764979	0.698789
Nup93	Common MN genes	0.926927	0.978597	0.909199	0.964761	0.826289	0.8211	0.897849	0.906929	0.891039	0.926022	0.910448	0.906446	0.897469	0.912719	0.914882	0.909907	0.922237
Nxph1	Common MN genes	0.965733	0.728354	0.439304	0.200627	0.223976	0.428494	0.951357	0.941844	0.909307	0.866645	0.843284	0.89271	0.924508	0.827817	0.829981	0.887735	0.909583
Nyap2	Common MN genes	0.891795	0.910604	0.866069	0.895255	0.756351	0.780348	0.952978	0.951357	0.954708	0.8382	0.884491	0.826303	0.796128	0.787908	0.691759	0.811162	0.72745
Oaz1	Common MN genes	0.566425	0.890174	0.883796	0.784456	0.830505	0.938385	0.791806	0.806507	0.793428	0.994809	0.995133	0.994376	0.994484	0.993511	0.994592	0.994268	0.994592
Ociad1	Common MN genes	0.711274	0.76943	0.990704	0.685331	0.969409	0.673765	0.932115	0.902821	0.906821	0.74854	0.786394	0.828683	0.836578	0.651525	0.806295	0.688838	0.817651
Ogt	Common MN genes	0.932764	0.951573	0.899362	0.95687	0.918603	0.916333	0.935034	0.935142	0.946708	0.970906	0.973286	0.973178	0.969068	0.975449	0.972853	0.97361	0.977287
Ola1	Common MN genes	0.862609	0.938277	0.945303	0.9279	0.88131	0.462869	0.922387	0.957086	0.939898	0.811162	0.87281	0.876703	0.802509	0.822518	0.81949	0.818841	0.784339
Olfm1	Common MN genes	0.983677	0.916117	0.974165	0.920117	0.886931	0.962707	0.991785	0.993514	0.993082	0.987562	0.989833	0.989942	0.994376	0.986481	0.98767	0.987238	0.990915
Opa1	Common MN genes	0.902065	0.736677	0.788996	0.599178	0.8211	0.717544	0.95795	0.94833	0.940439	0.785961	0.824032	0.83647	0.833766	0.849557	0.825871	0.797859	0.840688
Otud6b	Common MN genes	0.961734	0.982921	0.599827	0.982488	0.978705	0.726408	0.897741	0.886607	0.896984	0.755354	0.779797	0.756976	0.804023	0.674886	0.721069	0.67294	0.696193
Oxr1	Common MN genes	0.693222	0.665333	0.824884	0.813317	0.459734	0.905416	0.871041	0.890715	0.906929	0.751893	0.703439	0.747675	0.782933	0.719122	0.759464	0.771901	0.710902
Oxsr1	Common MN genes	0.816668	0.935575	0.81883	0.765106	0.896336	0.765755	0.723706	0.79386	0.756459	0.806727	0.863725	0.777634	0.797642	0.848908	0.808674	0.841878	0.809215
P4hb	Common MN genes	0.955572	0.801643	0.734515	0.968328	0.899578	0.955248	0.934169	0.953951	0.946817	0.920398	0.923967	0.908068	0.900065	0.94841	0.951655	0.917262	0.922777
Pabpc1	Common MN genes	0.987569	0.968436	0.983353	0.99092	0.991352	0.987893	0.953194	0.957734	0.952546	0.987995	0.986481	0.98713	0.98594	0.994484	0.991997	0.989833	0.989942
Pafah1b1	Common MN genes	0.876338	0.909739	0.958491	0.964112	0.926386	0.871798	0.987893	0.98638	0.987893	0.980857	0.985724	0.983128	0.986264	0.976855	0.975341	0.978045	0.975449
Pafah1b2	Common MN genes	0.889742	0.879797	0.825965	0.851043	0.793212	0.619609	0.967895	0.965842	0.973084	0.963876	0.96485	0.959009	0.952844	0.96485	0.949275	0.956954	0.950249
Paip1	Common MN genes	0.747487	0.908767	0.745109	0.939358	0.862393	0.524051	0.960653	0.944763	0.950708	0.821004	0.760004	0.83236	0.914882	0.456738	0.732425	0.650443	0.666667
Paip2	Common MN genes	0.944871	0.988974	0.564912	0.959248	0.780997	0.771917	0.953302	0.948654	0.961518	0.97361	0.976963	0.979451	0.976314	0.973935	0.976747	0.979018	0.97188
Pak1	Common MN genes	0.638093	0.791698	0.768566	0.168955	0.846503	0.70587	0.975462	0.972868	0.979137	0.795695	0.709929	0.8183	0.790288	0.804889	0.780662	0.831819	0.791369
Pak2	Common MN genes	0.408929	0.858394	0.840666	0.784023	0.820019	0.428494	0.763917	0.681548	0.753324	0.762925	0.770279	0.739888	0.738157	0.753515	0.767683	0.702141	0.738914
Papola	Common MN genes	0.793212	0.856016	0.772781	0.760999	0.887364	0.766728	0.931899	0.926062	0.935575	0.96247	0.963552	0.972096	0.975449	0.957495	0.967986	0.971988	0.965823
Papss1	Common MN genes	0.979894	0.858718	0.873095	0.978381	0.985623	0.854394	0.900119	0.882607	0.871257	0.760221	0.796777	0.777525	0.732857	0.776011	0.824032	0.81711	0.802942
Paxbp1	Common MN genes	0.773538	0.66836	0.73765	0.653551	0.389688	0.509567	0.892444	0.883472	0.927143	0.85172	0.818408	0.861237	0.864806	0.859507	0.843392	0.862319	0.855613
Pbrm1	Common MN genes	0.819479	0.769322	0.79386	0.901957	0.862826	0.878608	0.968003	0.959896	0.958383	0.918559	0.918019	0.933917	0.921371	0.938892	0.93608	0.928726	0.925373
Pbx1	Common MN genes	0.90347	0.78078	0.86088	0.391309	0.557129	0.862393	0.911685	0.927251	0.937953	0.829548	0.825438	0.773848	0.744214	0.874973	0.883734	0.898334	0.847826
Pbx3	Common MN genes	0.8785	0.90801	0.891579	0.722192	0.846071	0.769863	0.967787	0.967031	0.971679	0.9496	0.962578	0.964742	0.962687	0.931538	0.945274	0.951547	0.948302
Pcf11	Common MN genes	0.745865	0.82456	0.710734	0.805426	0.834612	0.876662	0.74165	0.710518	0.695168	0.836902	0.830954	0.842635	0.828466	0.885788	0.847934	0.87162	0.86286
Pcm1	Common MN genes	0.874068	0.880553	0.878392	0.937304	0.960761	0.913199	0.969409	0.97103	0.964977	0.909691	0.880597	0.905473	0.895739	0.896171	0.91737	0.891629	0.898334
Pcmt1	Common MN genes	0.937304	0.977516	0.963572	0.950924	0.917739	0.962058	0.909956	0.931251	0.917414	0.912827	0.893251	0.893359	0.906662	0.908068	0.867835	0.850314	0.912935
Pcp4	Common MN genes	0.999351	0.98184	0.980002	0.994919	0.999351	1	0.769214	0.858069	0.89039	0.95663	0.975016	0.940947	0.938676	0.809539	0.794938	0.808566	0.840255
Pdcd10	Common MN genes	0.686737	0.783699	0.82283	0.663928	0.561453	0.428494	0.763701	0.792563	0.793536	0.764979	0.794181	0.683647	0.735994	0.651201	0.729829	0.541099	0.577439
Gnpat	Common MN genes	0.727165	0.846719	0.53778	0.495406	0.894822	0.681656	0.764566	0.750405	0.716895	0.833225	0.850746	0.882436	0.855289	0.841769	0.805321	0.869024	0.834848
Pdcd6ip	Common MN genes	0.941844	0.892444	0.87904	0.923792	0.74846	0.98465	0.807264	0.789104	0.789752	0.837876	0.828791	0.833441	0.822085	0.868267	0.875406	0.865347	0.852693
Pdcl	Common MN genes	0.825424	0.939574	0.971354	0.979245	0.979245	0.984867	0.834288	0.820992	0.822398	0.87692	0.874216	0.90331	0.87573	0.799265	0.831927	0.868484	0.861562
Pde7a	Common MN genes	0.729002	0.831153	0.713761	0.501243	0.720679	0.570965	0.752459	0.757864	0.817858	0.903634	0.897361	0.901363	0.920182	0.918884	0.921047	0.924183	0.927969
Pdha1	Common MN genes	0.863366	0.661334	0.979462	0.739488	0.879905	0.994163	0.945736	0.957842	0.94206	0.849881	0.866429	0.880273	0.825979	0.783907	0.848475	0.842418	0.851612
Pdhb	Common MN genes	0.991028	0.99146	0.996757	0.984975	0.907469	0.979894	0.909307	0.915036	0.930818	0.905797	0.948086	0.930024	0.915856	0.927428	0.912503	0.952953	0.91088
Pdia3	Common MN genes	0.920657	0.965733	0.943249	0.978705	0.9466	0.882932	0.993082	0.994163	0.990055	0.875081	0.895955	0.887519	0.778283	0.920398	0.88568	0.88103	0.896604
Pdia6	Common MN genes	0.980326	0.880229	0.979029	0.798616	0.924116	0.804454	0.868122	0.832775	0.881743	0.892927	0.894225	0.889898	0.854856	0.898334	0.939974	0.910556	0.902552
Pdpk1	Common MN genes	0.854935	0.774187	0.782294	0.838504	0.909199	0.585991	0.894822	0.915685	0.897308	0.839606	0.82414	0.833766	0.815055	0.77958	0.833117	0.778931	0.817435
Peli1	Common MN genes	0.929737	0.854502	0.964544	0.772565	0.963139	0.765539	0.752783	0.69052	0.735488	0.890006	0.860697	0.871188	0.867835	0.925373	0.911746	0.884599	0.892278
Pfdn4	Common MN genes	0.752567	0.51616	0.913199	0.777429	0.767809	0.428494	0.8785	0.864555	0.864879	0.816137	0.724746	0.701384	0.830629	0.714039	0.803266	0.656608	0.728531
Pfn2	Common MN genes	0.981299	0.909199	0.972003	0.988758	0.975462	0.920333	0.988758	0.989407	0.989839	0.988536	0.992213	0.991997	0.992645	0.986156	0.988211	0.990807	0.988536
Pgp	Common MN genes	0.581775	0.841747	0.83645	0.326667	0.223976	0.627716	0.719922	0.842936	0.799589	0.786502	0.806186	0.779689	0.729396	0.793208	0.789639	0.764871	0.830521
Phax	Common MN genes	0.895471	0.59907	0.805643	0.543293	0.810291	0.428494	0.881526	0.880662	0.921738	0.876379	0.820571	0.879732	0.935756	0.783366	0.849665	0.842202	0.84761
Phf14	Common MN genes	0.813642	0.945411	0.686412	0.926819	0.878932	0.883364	0.846719	0.845098	0.844557	0.966472	0.963227	0.968527	0.969176	0.963552	0.970474	0.955548	0.971231
Phf3	Common MN genes	0.739163	0.786942	0.807372	0.898606	0.848989	0.866177	0.721003	0.729002	0.698195	0.922237	0.889682	0.906662	0.913043	0.901038	0.910772	0.880273	0.896712
Phyhipl	Common MN genes	0.867474	0.740677	0.950816	0.743703	0.849097	0.923576	0.796454	0.837639	0.783807	0.912395	0.922237	0.929591	0.945165	0.884382	0.904716	0.937703	0.930781
Pias2	Common MN genes	0.558859	0.908875	0.919576	0.600259	0.706951	0.669549	0.821641	0.857637	0.812777	0.818192	0.799156	0.824032	0.842202	0.773416	0.818624	0.879624	0.808782
Pkia	Common MN genes	0.716355	0.923035	0.662523	0.42363	0.823154	0.587936	0.998487	0.998595	0.998703	0.803591	0.828683	0.839066	0.889141	0.731343	0.796128	0.841337	0.820247
Pkm	Common MN genes	0.991568	0.98638	0.98919	0.984002	0.990704	0.981407	0.835585	0.820236	0.812885	0.932295	0.93846	0.904607	0.864915	0.939541	0.916396	0.924292	0.953493
Plppr1	Common MN genes	0.950168	0.954167	0.990271	0.921846	0.775376	0.943466	0.851259	0.817101	0.823262	0.975016	0.978261	0.979667	0.981614	0.962578	0.966256	0.974151	0.974475
Plrg1	Common MN genes	0.842395	0.932872	0.817101	0.807264	0.853854	0.428494	0.78197	0.668144	0.760675	0.788557	0.813	0.863184	0.859831	0.677482	0.80889	0.880164	0.823275
Pnisr	Common MN genes	0.979678	0.942385	0.950708	0.970057	0.976327	0.94887	0.864879	0.865312	0.89666	0.953277	0.901904	0.918343	0.905148	0.969392	0.952628	0.913692	0.948843
Pnn	Common MN genes	0.974814	0.783375	0.793103	0.886823	0.947898	0.96141	0.915361	0.912334	0.909523	0.920722	0.882436	0.897902	0.904607	0.93965	0.92321	0.887303	0.899308
Pnpla8	Common MN genes	0.845855	0.501892	0.900227	0.950816	0.557778	0.908334	0.772889	0.74673	0.794509	0.805754	0.764114	0.835713	0.823708	0.807376	0.829764	0.788882	0.824681
Poglut1	Common MN genes	0.881634	0.9239	0.927575	0.907361	0.698411	0.765323	0.760458	0.784672	0.765755	0.746593	0.703547	0.788449	0.672723	0.716959	0.714687	0.752433	0.692408
Ppa1	Common MN genes	0.976435	0.893093	0.944655	0.956005	0.975354	0.890498	0.822506	0.88531	0.924333	0.937703	0.927753	0.917586	0.897361	0.915639	0.911637	0.910448	0.923426
Pphln1	Common MN genes	0.796238	0.690412	0.901632	0.778186	0.821749	0.956005	0.830397	0.796346	0.804994	0.779797	0.787151	0.769197	0.789963	0.715877	0.783366	0.799589	0.752001
Ppid	Common MN genes	0.835369	0.884121	0.627716	0.904227	0.889093	0.68371	0.746082	0.802832	0.792131	0.807268	0.756435	0.770279	0.689487	0.792343	0.836578	0.669262	0.835929
Ppig	Common MN genes	0.833207	0.890498	0.799589	0.906497	0.891795	0.892768	0.791266	0.796779	0.801967	0.944841	0.891629	0.876055	0.919316	0.812784	0.925049	0.785745	0.839823
Ppm1b	Common MN genes	0.866177	0.756567	0.87169	0.756243	0.78424	0.89039	0.666847	0.7036	0.749108	0.853775	0.82944	0.875946	0.882111	0.806727	0.803374	0.812568	0.817867
Ppm1g	Common MN genes	0.850178	0.916766	0.8518	0.793536	0.788455	0.793212	0.834072	0.894822	0.917955	0.755137	0.751244	0.737616	0.631084	0.767575	0.716634	0.716526	0.757409
Ppm1l	Common MN genes	0.945952	0.659172	0.594422	0.976003	0.863474	0.967139	0.942493	0.944979	0.941952	0.882111	0.890655	0.880164	0.881895	0.912503	0.880705	0.890872	0.871945
Ppp1r12a	Common MN genes	0.651497	0.834072	0.839585	0.936115	0.954383	0.939682	0.843044	0.8518	0.85407	0.83647	0.767467	0.814514	0.849989	0.821653	0.843933	0.756111	0.807917
Ppp1r2	Common MN genes	0.779267	0.776024	0.73538	0.792022	0.623068	0.951789	0.880986	0.904227	0.907578	0.95252	0.954142	0.970906	0.96247	0.962254	0.965499	0.971123	0.955224
Ppp1r7	Common MN genes	0.662523	0.960653	0.837855	0.879797	0.603719	0.913307	0.738082	0.753108	0.687493	0.907852	0.948518	0.931213	0.926995	0.925698	0.914449	0.931213	0.926563
Ppp1r9a	Common MN genes	0.845963	0.860772	0.61615	0.75808	0.80921	0.828451	0.870284	0.91655	0.901092	0.767359	0.71804	0.673372	0.722366	0.703764	0.588903	0.597664	0.681376
Ppp2ca	Common MN genes	0.924765	0.936007	0.918387	0.950059	0.914388	0.970057	0.962058	0.971571	0.97049	0.985291	0.98183	0.980965	0.979451	0.985832	0.982263	0.981722	0.983344
Ppp2cb	Common MN genes	0.871906	0.648362	0.917414	0.681116	0.530645	0.866609	0.947573	0.915361	0.89493	0.898659	0.948951	0.958685	0.959766	0.909042	0.90915	0.957928	0.897145
Ppp2r2a	Common MN genes	0.943141	0.746406	0.908334	0.916441	0.802832	0.621338	0.876122	0.851259	0.842612	0.896712	0.898875	0.917262	0.927969	0.885031	0.902661	0.919641	0.920074
Ppp2r2c	Common MN genes	0.764026	0.708464	0.770619	0.598422	0.584802	0.746946	0.882283	0.897308	0.913199	0.887843	0.898334	0.879948	0.908177	0.80597	0.843175	0.866321	0.894765
Ppp3ca	Common MN genes	0.833315	0.773538	0.810183	0.498541	0.509242	0.719382	0.927467	0.931467	0.934494	0.846204	0.850963	0.802293	0.813757	0.794614	0.825114	0.760329	0.843392
Ppp3cb	Common MN genes	0.748784	0.625446	0.957194	0.731272	0.955248	0.428494	0.956113	0.964977	0.942817	0.893576	0.881138	0.891196	0.906879	0.863617	0.875189	0.856262	0.879732
Ppp3r1	Common MN genes	0.935683	0.821317	0.855907	0.908118	0.906172	0.723814	0.992433	0.985623	0.988542	0.96539	0.977287	0.969608	0.974367	0.923967	0.949816	0.946463	0.944949
Ppp4r1	Common MN genes	0.66328	0.885958	0.928873	0.554535	0.540158	0.651605	0.754621	0.772241	0.780564	0.877461	0.884707	0.881246	0.871404	0.86048	0.886762	0.856695	0.864915
Prdx1	Common MN genes	0.985623	0.98465	0.995244	0.982596	0.986812	0.964544	0.936655	0.936331	0.932656	0.99589	0.998378	0.998486	0.998378	0.994592	0.996755	0.998161	0.995782
Prdx3	Common MN genes	0.844125	0.895038	0.910929	0.812237	0.513242	0.523943	0.908875	0.963572	0.924765	0.830954	0.849881	0.798724	0.863833	0.780986	0.840255	0.817759	0.85875
Prelid1	Common MN genes	0.893633	0.895903	0.5287	0.653983	0.659604	0.428494	0.834937	0.850503	0.767485	0.773091	0.798832	0.716851	0.598205	0.755137	0.819381	0.692948	0.751785
Prkar1a	Common MN genes	0.890715	0.890606	0.933953	0.911037	0.959788	0.928548	0.979462	0.9773	0.987569	0.965823	0.966472	0.963876	0.963227	0.966256	0.968419	0.970906	0.966905
Prkar1b	Common MN genes	0.824019	0.871798	0.806616	0.960653	0.766836	0.929305	0.903146	0.88077	0.899795	0.859615	0.881787	0.880705	0.887194	0.869457	0.866429	0.83236	0.890331
Prpf40a	Common MN genes	0.770944	0.827046	0.766728	0.925413	0.66609	0.844125	0.885418	0.839909	0.80975	0.863292	0.916937	0.891629	0.887086	0.905148	0.923102	0.914666	0.933701
Prpf4b	Common MN genes	0.604908	0.838288	0.858718	0.800778	0.854286	0.574749	0.877094	0.869636	0.849746	0.695003	0.727774	0.708631	0.809215	0.759788	0.722366	0.728856	0.717283
Prpf8	Common MN genes	0.902497	0.790401	0.910172	0.911685	0.874608	0.80467	0.948546	0.95514	0.959248	0.918668	0.938135	0.947545	0.928618	0.957279	0.949167	0.965823	0.953602
Prrc2c	Common MN genes	0.957842	0.984326	0.941196	0.978489	0.984975	0.985083	0.967031	0.966166	0.962599	0.954683	0.938676	0.95133	0.91618	0.972853	0.959226	0.959226	0.964417
Psip1	Common MN genes	0.886499	0.938169	0.92336	0.968652	0.961518	0.855907	0.938709	0.945736	0.954491	0.903201	0.73156	0.853234	0.872485	0.855938	0.849448	0.810945	0.829656
Psma1	Common MN genes	0.900551	0.989515	0.636796	0.938926	0.928008	0.588693	0.935466	0.927035	0.908334	0.966796	0.972529	0.971014	0.961929	0.966905	0.963876	0.973394	0.972312
Psma2	Common MN genes	0.899578	0.659388	0.671495	0.437466	0.842395	0.658631	0.923035	0.867149	0.837315	0.951114	0.969825	0.967229	0.96777	0.929483	0.956197	0.970366	0.953061
Psma3	Common MN genes	0.857421	0.933845	0.695168	0.880553	0.656794	0.756567	0.781645	0.827586	0.874824	0.975557	0.977071	0.978045	0.977071	0.970474	0.979018	0.982154	0.978585
Psma5	Common MN genes	0.990704	0.986596	0.978921	0.957518	0.655605	0.91936	0.879472	0.895687	0.86942	0.937162	0.938892	0.93965	0.906554	0.942786	0.944733	0.943543	0.9443
Psma6	Common MN genes	0.890606	0.924116	0.960437	0.39239	0.590855	0.598962	0.970273	0.978705	0.98692	0.943111	0.942029	0.920722	0.943543	0.918451	0.938027	0.935107	0.917045
Psmb2	Common MN genes	0.989623	0.943357	0.960977	0.947357	0.960221	0.428494	0.978273	0.97049	0.9773	0.944408	0.940407	0.96539	0.962146	0.929159	0.959334	0.967121	0.95836
Psmb7	Common MN genes	0.892552	0.923143	0.956437	0.719274	0.905848	0.559831	0.822073	0.830613	0.840558	0.790071	0.780662	0.796669	0.739022	0.849665	0.79602	0.810621	0.859507
Psmc1	Common MN genes	0.760783	0.722841	0.657442	0.93752	0.716355	0.977948	0.943898	0.944006	0.967031	0.928618	0.93262	0.909258	0.848151	0.942353	0.925698	0.898551	0.939433
Psmc2	Common MN genes	0.910388	0.933413	0.905848	0.96368	0.916117	0.984002	0.844125	0.800346	0.796671	0.95955	0.971988	0.967554	0.95544	0.972096	0.959117	0.975449	0.965931
Psmc3	Common MN genes	0.933196	0.678737	0.926386	0.716139	0.887255	0.877959	0.901957	0.887255	0.829748	0.943002	0.961605	0.958144	0.946247	0.938568	0.941921	0.966364	0.950141
Psmc5	Common MN genes	0.861204	0.969517	0.873635	0.904335	0.873527	0.770187	0.974165	0.981624	0.951573	0.951655	0.960523	0.961713	0.940299	0.960091	0.940839	0.968311	0.962038
Psmd1	Common MN genes	0.924441	0.952546	0.78878	0.826938	0.938277	0.583504	0.925197	0.929413	0.923252	0.91326	0.930456	0.920074	0.897794	0.92613	0.919857	0.938244	0.924508
Psmd12	Common MN genes	0.929305	0.959031	0.906929	0.963139	0.681548	0.971895	0.963896	0.969517	0.959031	0.97653	0.978477	0.976963	0.96896	0.976963	0.977396	0.977179	0.978261
Psmd13	Common MN genes	0.931899	0.480489	0.933845	0.840666	0.316398	0.677548	0.7263	0.764674	0.75527	0.936189	0.940515	0.934999	0.902012	0.962903	0.953385	0.93554	0.942894
Psmd14	Common MN genes	0.764782	0.890066	0.635715	0.408388	0.423089	0.953843	0.927575	0.91255	0.897957	0.892278	0.911529	0.905689	0.911746	0.909583	0.910231	0.911746	0.900173
Psmd6	Common MN genes	0.801319	0.821533	0.684467	0.964544	0.909956	0.428494	0.909415	0.91028	0.900011	0.898226	0.877785	0.874324	0.842526	0.885897	0.89509	0.883301	0.856262
Psmd7	Common MN genes	0.93979	0.882499	0.957302	0.886931	0.782834	0.898173	0.938601	0.951897	0.947357	0.967662	0.972421	0.977504	0.968311	0.972421	0.965607	0.979234	0.974043
Psme3	Common MN genes	0.88304	0.601989	0.768349	0.689871	0.343422	0.4753	0.88131	0.89266	0.87904	0.784339	0.812784	0.837011	0.821544	0.791261	0.812135	0.838957	0.80835
Pspc1	Common MN genes	0.557129	0.735812	0.841639	0.827586	0.891039	0.852556	0.809318	0.867041	0.850503	0.972421	0.961929	0.968202	0.960848	0.982046	0.974908	0.976422	0.979234
Ptcd3	Common MN genes	0.543833	0.857097	0.839261	0.335207	0.516269	0.776349	0.705653	0.730732	0.707167	0.736967	0.738806	0.692408	0.772658	0.779148	0.78899	0.786502	0.788882
Pten	Common MN genes	0.752459	0.742514	0.856124	0.892012	0.761107	0.868122	0.964004	0.961193	0.959356	0.941272	0.941272	0.944841	0.949059	0.929916	0.934566	0.949275	0.940947
Ptn	Common MN genes	0.993947	0.998919	0.99827	0.994703	0.998162	0.988974	0.976111	0.958815	0.958167	0.865888	0.908177	0.878109	0.888276	0.929375	0.972421	0.950898	0.931538
Ptp4a1	Common MN genes	0.99146	0.99319	0.987461	0.991028	0.986596	0.966814	0.682953	0.767268	0.717544	0.992105	0.993186	0.994268	0.997296	0.98183	0.990915	0.989617	0.989293
Ptpn12	Common MN genes	0.828991	0.853746	0.952221	0.93471	0.784996	0.451627	0.934277	0.91309	0.892012	0.784231	0.748756	0.816569	0.778607	0.815163	0.793857	0.850205	0.798616
Ptpn4	Common MN genes	0.83591	0.876122	0.939898	0.551724	0.796454	0.881959	0.917522	0.905308	0.891795	0.817218	0.813108	0.828791	0.802726	0.828791	0.827385	0.854856	0.821761
Ptpra	Common MN genes	0.822938	0.788563	0.609231	0.84272	0.909091	0.571938	0.70814	0.718301	0.743811	0.76963	0.809756	0.780986	0.697491	0.772226	0.788774	0.725503	0.750054
Ptpro	Common MN genes	0.93752	0.929521	0.945087	0.884337	0.903362	0.821209	0.918387	0.950816	0.950384	0.92202	0.934674	0.931105	0.916396	0.900281	0.897902	0.922777	0.906446
Qdpr	Common MN genes	0.98184	0.979678	0.900551	0.922603	0.962923	0.914496	0.864015	0.835369	0.787915	0.790937	0.857344	0.767143	0.817975	0.728531	0.806078	0.719446	0.768549
Qk	Common MN genes	0.960869	0.973408	0.95568	0.892552	0.927683	0.980975	0.977192	0.976435	0.975138	0.935323	0.949059	0.932403	0.930024	0.963876	0.958144	0.973718	0.959334
Qser1	Common MN genes	0.562966	0.856232	0.713977	0.892444	0.727273	0.869203	0.847692	0.861853	0.831586	0.728856	0.690028	0.686892	0.707225	0.760978	0.776011	0.732425	0.771685
R3hdm1	Common MN genes	0.950059	0.962599	0.987785	0.911145	0.963247	0.82564	0.78024	0.739488	0.795806	0.876055	0.881354	0.867402	0.87043	0.889033	0.885356	0.869673	0.882111
Rab10	Common MN genes	0.98919	0.945952	0.955897	0.98465	0.99373	0.946384	0.995568	0.995028	0.994811	0.969608	0.974584	0.970366	0.961281	0.971663	0.969068	0.975016	0.969825
Rab11a	Common MN genes	0.965085	0.755918	0.678305	0.77343	0.789104	0.899254	0.986488	0.985515	0.988974	0.929159	0.925049	0.938244	0.928726	0.899632	0.906446	0.90623	0.907636
Rab11b	Common MN genes	0.914171	0.595827	0.958383	0.98011	0.967463	0.752135	0.705113	0.797319	0.817317	0.979342	0.986264	0.985724	0.986156	0.974908	0.980208	0.981289	0.981614
Rab14	Common MN genes	0.966058	0.959572	0.980867	0.95514	0.920873	0.988326	0.879797	0.891039	0.884337	0.968419	0.9695	0.969392	0.972853	0.970582	0.967013	0.975233	0.971123
Rab18	Common MN genes	0.860231	0.93698	0.844774	0.765539	0.404389	0.522106	0.944871	0.934061	0.942709	0.942678	0.949924	0.951438	0.97069	0.918992	0.941813	0.946031	0.940623
Rab1a	Common MN genes	0.987028	0.9506	0.984758	0.986164	0.897416	0.992541	0.991244	0.988217	0.985083	0.963335	0.965499	0.968419	0.9695	0.937595	0.955981	0.971231	0.961605
Rab22a	Common MN genes	0.703708	0.682088	0.902281	0.547616	0.399524	0.485677	0.685115	0.711383	0.743487	0.737616	0.690244	0.721069	0.823599	0.597772	0.713065	0.636491	0.631841
Rab2a	Common MN genes	0.944006	0.916333	0.874176	0.940979	0.939142	0.940547	0.997406	0.996757	0.997838	0.961713	0.967013	0.96777	0.970798	0.946788	0.964742	0.970474	0.960307
Rab39b	Common MN genes	0.769971	0.75808	0.79105	0.822289	0.828451	0.428494	0.954491	0.936872	0.949627	0.877028	0.863617	0.862751	0.857019	0.867618	0.877244	0.85053	0.874757
Rab3c	Common MN genes	0.865636	0.817209	0.460275	0.894822	0.835369	0.894282	0.986596	0.984758	0.986704	0.957171	0.952736	0.951547	0.962254	0.950898	0.93554	0.953277	0.964309
Rab5a	Common MN genes	0.865096	0.708032	0.747703	0.839261	0.929413	0.95514	0.833964	0.777105	0.705653	0.913476	0.914233	0.929916	0.936297	0.853883	0.892927	0.917045	0.908609
Rab5c	Common MN genes	0.954383	0.807805	0.940439	0.670846	0.933413	0.428494	0.91482	0.891471	0.925522	0.764763	0.788882	0.810729	0.733615	0.710037	0.778823	0.758166	0.79721
Rab6a	Common MN genes	0.935358	0.857529	0.901308	0.876986	0.793968	0.74846	0.993622	0.992109	0.992109	0.990158	0.99416	0.994051	0.992213	0.988427	0.986589	0.993511	0.987021
Rab7	Common MN genes	0.997081	0.997838	0.993514	0.994271	0.995784	0.953951	0.987569	0.989731	0.982705	0.97891	0.984534	0.982263	0.981938	0.979018	0.978045	0.98356	0.978045
Rabep1	Common MN genes	0.807696	0.771052	0.823479	0.918279	0.88304	0.757432	0.859583	0.893309	0.852556	0.909474	0.860805	0.851612	0.85053	0.905256	0.880273	0.865996	0.91499
Rac1	Common MN genes	0.875365	0.819371	0.80521	0.860231	0.988434	0.750405	0.985839	0.985839	0.98011	0.980965	0.968635	0.966256	0.956197	0.982803	0.978477	0.971663	0.982479
Rac3	Common MN genes	0.996757	0.996865	0.998379	0.996541	0.993298	0.998487	0.919901	0.943357	0.936223	0.980424	0.980532	0.973394	0.973178	0.979126	0.969176	0.962795	0.977071
Rad21	Common MN genes	0.722084	0.877419	0.888444	0.829856	0.698627	0.69333	0.914928	0.931683	0.929737	0.911529	0.910989	0.921263	0.915531	0.924508	0.927428	0.921047	0.921804
Rad23b	Common MN genes	0.962058	0.851151	0.943466	0.928656	0.917522	0.928873	0.93698	0.96195	0.960437	0.879083	0.79018	0.877028	0.917262	0.738914	0.826411	0.834307	0.839606
Rae1	Common MN genes	0.800886	0.924981	0.60761	0.818398	0.91882	0.859475	0.715923	0.824451	0.728354	0.736102	0.804023	0.793749	0.773632	0.748973	0.77904	0.735021	0.715012
Ralgapb	Common MN genes	0.767268	0.869095	0.51843	0.884229	0.823262	0.694195	0.856232	0.875041	0.858394	0.712416	0.762384	0.785096	0.768116	0.799805	0.765088	0.79602	0.753623
Ralyl	Common MN genes	0.90855	0.943574	0.948006	0.949951	0.965085	0.90628	0.758729	0.715058	0.7263	0.774822	0.829115	0.72453	0.759464	0.625352	0.664287	0.689487	0.683323
Ranbp1	Common MN genes	0.931575	0.922603	0.913307	0.904767	0.905956	0.977516	0.928656	0.896011	0.950816	0.962038	0.947869	0.950249	0.947653	0.946139	0.965282	0.951871	0.947761
Rangap1	Common MN genes	0.705113	0.565452	0.915036	0.576154	0.519511	0.481029	0.899254	0.901524	0.90401	0.756543	0.778391	0.730262	0.721177	0.733831	0.735453	0.751568	0.750595
Rap1b	Common MN genes	0.836558	0.885202	0.775051	0.869636	0.729759	0.626851	0.995676	0.991244	0.995244	0.890872	0.864482	0.874648	0.925481	0.690569	0.828575	0.802942	0.762276
Rap1gds1	Common MN genes	0.897957	0.817966	0.877527	0.812993	0.945411	0.803048	0.967679	0.970814	0.963463	0.961605	0.97188	0.967337	0.958685	0.941488	0.956414	0.957387	0.953385
Rb1cc1	Common MN genes	0.750622	0.807156	0.615609	0.657226	0.775159	0.87223	0.882932	0.869095	0.866825	0.881895	0.820463	0.855613	0.858966	0.834199	0.871512	0.813865	0.853342
Rbfox1	Common MN genes	0.952654	0.956113	0.956005	0.95287	0.944655	0.754621	0.985623	0.986272	0.986272	0.975233	0.983452	0.982371	0.983669	0.967337	0.975233	0.979451	0.977504
Rbm5	Common MN genes	0.964652	0.879256	0.952005	0.974381	0.932872	0.766187	0.882067	0.877635	0.862177	0.974475	0.970041	0.953602	0.95079	0.984642	0.974367	0.963444	0.969933
Rbm18	Common MN genes	0.762836	0.922711	0.892228	0.960761	0.567614	0.595071	0.847584	0.828235	0.805426	0.841445	0.88514	0.868592	0.880597	0.816353	0.832144	0.868592	0.829007
Rbm26	Common MN genes	0.703275	0.646309	0.80067	0.728246	0.897525	0.442331	0.933629	0.92336	0.941196	0.953169	0.928185	0.949816	0.964742	0.944733	0.961497	0.942786	0.955332
Rbm39	Common MN genes	0.800346	0.674305	0.794293	0.793752	0.891579	0.888985	0.960869	0.956653	0.956437	0.905473	0.905581	0.918019	0.904175	0.936621	0.937162	0.944408	0.944625
Rbms3	Common MN genes	0.913631	0.667387	0.821857	0.836774	0.742514	0.580045	0.985407	0.979678	0.981732	0.800671	0.900822	0.754597	0.786827	0.795263	0.766061	0.873459	0.792775
Rc3h1	Common MN genes	0.728462	0.770295	0.792779	0.849097	0.502432	0.95968	0.887904	0.831586	0.861853	0.733939	0.714039	0.761518	0.749946	0.754056	0.728315	0.778391	0.736102
Rcan2	Common MN genes	0.755594	0.786185	0.686304	0.803697	0.832883	0.549886	0.958491	0.963896	0.95914	0.89509	0.915639	0.923967	0.902769	0.920074	0.911205	0.927104	0.937378
Rcn2	Common MN genes	0.664361	0.771808	0.707383	0.701654	0.531402	0.638309	0.887255	0.82791	0.857745	0.990915	0.989725	0.988752	0.99178	0.98475	0.99005	0.986156	0.987238
Rdx	Common MN genes	0.828883	0.84726	0.897525	0.885418	0.866069	0.901092	0.872338	0.877419	0.899362	0.960848	0.930132	0.937054	0.948626	0.947112	0.953926	0.882436	0.934674
Reep1	Common MN genes	0.930278	0.96876	0.964652	0.951789	0.97103	0.955464	0.996865	0.997081	0.996217	0.993294	0.993294	0.98767	0.991348	0.986697	0.985507	0.981397	0.987562
Reps1	Common MN genes	0.650308	0.918603	0.835153	0.533348	0.88585	0.428494	0.830937	0.810939	0.78424	0.788233	0.839714	0.790288	0.830738	0.762492	0.773307	0.849016	0.822302
Ret	Common MN genes	0.965625	0.94433	0.958059	0.687926	0.671171	0.786077	0.98411	0.983894	0.985731	0.739888	0.813433	0.678888	0.677158	0.429591	0.46074	0.522929	0.522713
Rev3l	Common MN genes	0.630094	0.882175	0.774187	0.814398	0.798508	0.501675	0.983569	0.983245	0.982596	0.879948	0.887303	0.876271	0.90677	0.853775	0.897145	0.872377	0.867618
Rheb	Common MN genes	0.823695	0.944655	0.623284	0.873635	0.983786	0.939466	0.713112	0.677873	0.751594	0.763357	0.763682	0.758382	0.80186	0.630218	0.718689	0.628921	0.611508
Rhoa	Common MN genes	0.982596	0.962382	0.956113	0.969084	0.980435	0.763485	0.787807	0.743379	0.797643	0.991131	0.995241	0.994809	0.993078	0.989509	0.993619	0.993078	0.989833
Rhob	Common MN genes	0.980975	0.934602	0.967787	0.98238	0.984434	0.986596	0.884121	0.895903	0.903578	0.931862	0.928726	0.89974	0.896388	0.859291	0.874108	0.813108	0.835064
Rictor	Common MN genes	0.88758	0.837207	0.757648	0.66555	0.697871	0.741325	0.862934	0.833748	0.763809	0.697707	0.607398	0.71923	0.775687	0.646334	0.656608	0.749405	0.721069
Rimklb	Common MN genes	0.784131	0.832018	0.922387	0.370122	0.599287	0.472922	0.955572	0.944114	0.939682	0.874432	0.904283	0.882868	0.915098	0.833333	0.851395	0.880489	0.850638
Riok3	Common MN genes	0.871149	0.900984	0.705005	0.848773	0.859367	0.841098	0.764998	0.791266	0.815479	0.796561	0.820787	0.865347	0.846528	0.786502	0.792018	0.858425	0.813757
Rnd3	Common MN genes	0.882607	0.905956	0.527294	0.787699	0.763269	0.880337	0.871365	0.872338	0.895579	0.949384	0.926779	0.959875	0.933377	0.95663	0.95663	0.959983	0.961713
Rnf11	Common MN genes	0.685656	0.525024	0.974597	0.550427	0.486542	0.545238	0.866285	0.816885	0.888228	0.90212	0.929591	0.902336	0.925049	0.896712	0.904283	0.899957	0.90385
Rnf111	Common MN genes	0.69679	0.836126	0.615933	0.493568	0.75754	0.958707	0.751054	0.734407	0.760783	0.757625	0.73329	0.777201	0.782825	0.779256	0.744863	0.757733	0.72215
Rnf150	Common MN genes	0.760566	0.853962	0.81148	0.65474	0.588261	0.683169	0.774187	0.755162	0.710626	0.821544	0.833333	0.792883	0.805213	0.758382	0.742051	0.777417	0.762816
Rpa3	Common MN genes	0.790725	0.923252	0.747811	0.970922	0.601124	0.770511	0.751594	0.799373	0.681224	0.701493	0.69522	0.763898	0.707333	0.674562	0.67294	0.61313	0.722583
Rpl13	Common MN genes	0.987353	0.976219	0.992109	0.993622	0.992866	0.944006	0.755918	0.817533	0.807264	0.997837	0.994376	0.993943	0.99005	0.997621	0.997404	0.9947	0.997729
Rpl14	Common MN genes	0.985083	0.985407	0.977732	0.994595	0.996217	0.936547	0.933413	0.968003	0.939574	0.999243	0.999459	0.999351	0.999135	0.999135	0.999351	0.999459	0.999243
Rpl18a	Common MN genes	0.995784	0.999135	0.99946	0.995892	0.999676	0.998811	0.81883	0.827046	0.820452	0.993619	0.996539	0.995457	0.992105	0.994809	0.995566	0.997188	0.995674
Rpl22	Common MN genes	0.907145	0.846611	0.95114	0.605016	0.912334	0.78651	0.884553	0.906064	0.906388	0.940623	0.932728	0.91791	0.91207	0.948086	0.944841	0.947545	0.949924
Rpl22l1	Common MN genes	0.99827	0.990379	0.987893	0.93298	0.995568	0.904875	0.837639	0.825749	0.848989	0.984642	0.984426	0.99005	0.987454	0.984209	0.98594	0.988211	0.987887
Rpl23	Common MN genes	0.962815	0.962274	0.990488	0.982272	0.87623	0.988001	0.857961	0.832234	0.909956	0.998486	0.998702	0.99827	0.997188	0.998486	0.998486	0.998486	0.998918
Rpl26	Common MN genes	0.988434	0.989623	0.985731	0.996973	0.98919	0.919036	0.895687	0.830505	0.858502	0.999351	0.999567	0.999135	0.99881	0.999243	0.999243	0.999351	0.999351
Rpl27a	Common MN genes	0.995676	0.988001	0.994703	0.987677	0.994163	0.966166	0.74046	0.82283	0.808345	0.998918	0.995457	0.995133	0.993943	0.99827	0.998594	0.995674	0.998702
Rpl36	Common MN genes	0.958491	0.80748	0.724462	0.734623	0.974814	0.781321	0.825965	0.937845	0.877527	0.997621	0.997837	0.995998	0.994268	0.998053	0.998053	0.996755	0.998053
Rpl38	Common MN genes	0.951897	0.909631	0.984542	0.965733	0.954059	0.967355	0.886283	0.902929	0.925954	0.988319	0.993403	0.991239	0.985291	0.993294	0.991672	0.994592	0.989509
Rpl39	Common MN genes	0.964004	0.917414	0.963247	0.981407	0.982921	0.941628	0.973841	0.967463	0.968976	0.995025	0.988103	0.993835	0.993511	0.992862	0.995349	0.993835	0.994917
Rpl4	Common MN genes	0.998054	0.998595	0.992649	0.998487	0.998379	0.996217	0.99773	0.998703	0.997081	0.986589	0.990266	0.988644	0.984426	0.988103	0.990699	0.988319	0.987778
Rpl6	Common MN genes	0.992433	0.957734	0.993839	0.991136	0.994919	0.985191	0.729002	0.722841	0.745001	0.993403	0.986805	0.986156	0.983452	0.993186	0.993511	0.98767	0.994484
Rpl7	Common MN genes	0.974705	0.942709	0.984218	0.995244	0.991244	0.990271	0.936223	0.903578	0.877635	0.996864	0.999027	0.998918	0.998486	0.996215	0.997621	0.999135	0.997296
Rpl7a	Common MN genes	0.993082	0.993298	0.98865	0.998054	0.997189	0.992001	0.653551	0.744568	0.753756	0.988752	0.991131	0.98886	0.987778	0.989076	0.992537	0.990266	0.991564
Rpl8	Common MN genes	0.996433	0.990596	0.998595	0.998703	0.994271	0.996109	0.988217	0.98865	0.984867	0.995457	0.989617	0.988968	0.987887	0.995457	0.995241	0.991131	0.995998
Rplp0	Common MN genes	0.993622	0.984002	0.997189	0.993082	0.993947	0.97503	0.959896	0.974814	0.967571	0.989401	0.99178	0.990374	0.985507	0.991672	0.99178	0.991348	0.992105
Rpn1	Common MN genes	0.822614	0.809534	0.790185	0.503081	0.843044	0.428494	0.756999	0.719382	0.799049	0.949275	0.932944	0.924724	0.92851	0.96658	0.959983	0.94668	0.960199
Rpn2	Common MN genes	0.861637	0.806616	0.933413	0.766079	0.797211	0.903578	0.880013	0.854502	0.855907	0.919857	0.951547	0.948086	0.929159	0.927212	0.949924	0.960415	0.945598
Rps11	Common MN genes	0.98238	0.99546	0.977624	0.981624	0.997514	0.989298	0.968436	0.925305	0.938926	0.996323	0.996215	0.996647	0.993186	0.997188	0.997188	0.997296	0.997621
Rps14	Common MN genes	0.907253	0.961085	0.987569	0.959464	0.973841	0.428494	0.853205	0.840882	0.758188	0.98183	0.986156	0.986048	0.978261	0.983344	0.985399	0.989185	0.984426
Rps15	Common MN genes	0.823803	0.784564	0.640579	0.785212	0.747271	0.844882	0.96595	0.966382	0.979462	0.989942	0.989509	0.986805	0.986697	0.989833	0.991564	0.99297	0.99297
Rps15a	Common MN genes	0.993298	0.99773	0.996109	0.990379	0.991893	0.996325	0.768241	0.808021	0.795373	0.994268	0.996431	0.996106	0.994809	0.9947	0.996323	0.996539	0.995457
Rps17	Common MN genes	0.998811	0.998162	0.997081	0.999351	0.999568	0.999243	0.849638	0.898606	0.918928	0.994376	0.991239	0.985832	0.982046	0.995133	0.995025	0.992321	0.995241
Rps20	Common MN genes	0.994811	0.980759	0.994379	0.983353	0.999135	0.997514	0.901308	0.867474	0.915144	0.99827	0.998594	0.998161	0.996864	0.998702	0.99881	0.998378	0.998378
Rps21	Common MN genes	0.97049	0.907578	0.976327	0.974057	0.983029	0.543725	0.977084	0.974597	0.977408	0.662016	0.803915	0.744863	0.742051	0.701276	0.70517	0.800995	0.743997
Rps24	Common MN genes	0.958923	0.928548	0.963896	0.909956	0.746298	0.981299	0.823154	0.82964	0.803048	0.968635	0.951871	0.961605	0.95252	0.958469	0.974043	0.955981	0.970041
Rps25	Common MN genes	0.993406	0.985947	0.997622	0.998919	0.998054	0.996973	0.67063	0.712139	0.806399	0.992213	0.992429	0.990591	0.988319	0.993403	0.994051	0.992105	0.994268
Rps3	Common MN genes	0.97557	0.967355	0.965842	0.995028	0.99827	0.946168	0.952329	0.945087	0.95568	0.995241	0.996323	0.996215	0.995566	0.99589	0.996215	0.996431	0.99589
Rps3a1	Common MN genes	0.99373	0.996109	0.989515	0.990488	0.998595	0.806399	0.978705	0.982813	0.969949	0.997729	0.998918	0.999027	0.999027	0.997729	0.997837	0.999243	0.997945
Rps4x	Common MN genes	0.993839	0.991568	0.992001	0.985407	0.991677	0.943357	0.926711	0.943574	0.93471	0.9947	0.98886	0.987887	0.982154	0.995349	0.9947	0.988536	0.995349
Rps8	Common MN genes	0.985299	0.964652	0.978381	0.997081	0.993514	0.992649	0.861961	0.866393	0.86369	0.999459	0.999243	0.999459	0.999243	0.999567	0.999676	0.999567	0.999567
Rraga	Common MN genes	0.521133	0.942493	0.72176	0.469355	0.611285	0.691817	0.984326	0.976111	0.982272	0.887952	0.894008	0.90212	0.863509	0.92029	0.902228	0.911962	0.921696
Rrn3	Common MN genes	0.920982	0.761323	0.608583	0.481245	0.623176	0.64847	0.857745	0.827478	0.756243	0.79483	0.770063	0.762925	0.783582	0.738806	0.756652	0.700844	0.704629
Rsf1	Common MN genes	0.929845	0.740785	0.885526	0.864663	0.761431	0.894606	0.763161	0.726408	0.695925	0.894225	0.90093	0.899091	0.898659	0.925806	0.90331	0.909583	0.890115
Rsrc2	Common MN genes	0.92617	0.881634	0.948762	0.977084	0.988542	0.810183	0.861745	0.831045	0.840233	0.937919	0.910772	0.903093	0.916072	0.949816	0.942678	0.92905	0.932836
Rtca	Common MN genes	0.6956	0.882067	0.800454	0.843044	0.898497	0.779159	0.956437	0.947681	0.951032	0.718257	0.797967	0.623621	0.786502	0.536773	0.705927	0.651633	0.648497
Rtcb	Common MN genes	0.623608	0.942925	0.731056	0.591071	0.403092	0.527727	0.791698	0.829748	0.825857	0.790828	0.863292	0.813108	0.825546	0.78077	0.796993	0.852585	0.840472
Rtn1	Common MN genes	0.990596	0.981732	0.988434	0.976867	0.983245	0.969409	0.998162	0.998487	0.998811	0.995998	0.99589	0.996755	0.999459	0.974259	0.988752	0.984426	0.989185
Rtn4	Common MN genes	0.733759	0.823911	0.687926	0.654416	0.40547	0.881743	0.998919	0.999135	0.999027	0.984534	0.982263	0.982587	0.982803	0.975233	0.976206	0.975881	0.977936
Rundc3b	Common MN genes	0.841531	0.652038	0.841963	0.747595	0.413253	0.712355	0.908983	0.918495	0.872446	0.803158	0.749297	0.820571	0.811702	0.729613	0.753731	0.835172	0.813541
Sacs	Common MN genes	0.89039	0.661874	0.884121	0.792239	0.781321	0.972327	0.926494	0.918279	0.914171	0.961389	0.967662	0.960956	0.965282	0.948518	0.95425	0.955224	0.943759
Scaf11	Common MN genes	0.806075	0.876554	0.837963	0.774727	0.770079	0.659388	0.757107	0.741974	0.789969	0.769846	0.735778	0.781527	0.761627	0.834415	0.814623	0.80424	0.817543
Scaf4	Common MN genes	0.727057	0.901524	0.785429	0.928873	0.918495	0.945519	0.752243	0.803805	0.690736	0.764655	0.74735	0.782825	0.752001	0.810188	0.78488	0.806295	0.792667
Scaf8	Common MN genes	0.879472	0.688898	0.915144	0.853205	0.830397	0.67463	0.814182	0.748784	0.725327	0.86459	0.862751	0.832252	0.860372	0.904391	0.887519	0.877352	0.889249
Scamp1	Common MN genes	0.890498	0.786077	0.927035	0.751594	0.868771	0.675711	0.976975	0.980218	0.984434	0.93143	0.947653	0.943543	0.961389	0.915531	0.928834	0.951222	0.93608
Scaper	Common MN genes	0.933953	0.854827	0.947681	0.72911	0.848016	0.960653	0.934602	0.962274	0.955248	0.754813	0.73448	0.742375	0.746052	0.752109	0.706576	0.74032	0.747567
Sccpdh	Common MN genes	0.949087	0.818722	0.422333	0.573127	0.712139	0.693871	0.937953	0.908226	0.88358	0.867618	0.87043	0.879083	0.847177	0.821004	0.865996	0.839066	0.819165
Scg2	Common MN genes	0.960004	0.934277	0.952438	0.768998	0.871906	0.713869	0.931251	0.970165	0.975354	0.940839	0.940947	0.885572	0.95425	0.930673	0.939217	0.903526	0.938027
Scg3	Common MN genes	0.988974	0.960545	0.976219	0.983569	0.98465	0.985299	0.988434	0.988758	0.987137	0.988968	0.991348	0.989617	0.993619	0.98356	0.982479	0.985615	0.983452
Scg5	Common MN genes	0.962382	0.844125	0.915361	0.791158	0.882932	0.905199	0.981624	0.985947	0.988001	0.88806	0.851503	0.862211	0.891413	0.75849	0.837768	0.800346	0.818083
Scn3b	Common MN genes	0.947141	0.945195	0.811696	0.578532	0.401362	0.670522	0.962815	0.956329	0.95795	0.882327	0.89098	0.848908	0.850638	0.843933	0.82944	0.80835	0.849016
Scrn1	Common MN genes	0.93471	0.628905	0.916766	0.494217	0.348287	0.428494	0.884985	0.88758	0.850286	0.953493	0.968094	0.960632	0.962903	0.948626	0.947653	0.962146	0.959009
Sdc3	Common MN genes	0.957086	0.593882	0.84553	0.777862	0.740677	0.428494	0.91428	0.912442	0.915577	0.868592	0.819381	0.854532	0.783907	0.904175	0.815163	0.896928	0.886654
Sdcbp	Common MN genes	0.878932	0.901957	0.914171	0.768349	0.868122	0.872014	0.917739	0.89893	0.923576	0.939758	0.956414	0.946247	0.933268	0.947978	0.963552	0.932511	0.953277
Sdf4	Common MN genes	0.698411	0.908226	0.501675	0.559615	0.500378	0.748135	0.817317	0.846179	0.725003	0.894873	0.930997	0.925589	0.907852	0.887735	0.903634	0.920614	0.884491
Sdhb	Common MN genes	0.770403	0.779483	0.662415	0.66328	0.738623	0.915793	0.939574	0.940439	0.940006	0.888817	0.933917	0.922453	0.912719	0.908609	0.890115	0.928834	0.911962
Sec22b	Common MN genes	0.983461	0.906388	0.78478	0.932115	0.941952	0.980651	0.833423	0.780132	0.797968	0.837984	0.858966	0.874432	0.842418	0.833117	0.795695	0.865455	0.786394
Sec62	Common MN genes	0.90401	0.989298	0.320506	0.955572	0.800778	0.618203	0.899362	0.870933	0.884553	0.934458	0.902985	0.910989	0.909907	0.94257	0.933377	0.911854	0.929483
Sec63	Common MN genes	0.717436	0.931575	0.771592	0.936439	0.905199	0.920765	0.826938	0.769971	0.78651	0.947329	0.920506	0.953169	0.955981	0.933701	0.948194	0.945165	0.945057
Secisbp2l	Common MN genes	0.539293	0.858069	0.898497	0.572371	0.739488	0.694736	0.899795	0.917306	0.906497	0.777525	0.749081	0.744214	0.761194	0.733182	0.70928	0.754705	0.78077
Sel1l	Common MN genes	0.782078	0.818614	0.862069	0.478867	0.496271	0.916441	0.892012	0.892985	0.90574	0.704305	0.787043	0.771577	0.756219	0.78899	0.751676	0.827493	0.770387
Sema6a	Common MN genes	0.825316	0.873635	0.873311	0.878283	0.901092	0.610312	0.93471	0.90628	0.925413	0.812676	0.796453	0.867186	0.850097	0.866321	0.773199	0.92613	0.894657
Sema6d	Common MN genes	0.700465	0.569128	0.873527	0.877743	0.945303	0.853313	0.921954	0.918171	0.944763	0.934566	0.942786	0.953385	0.949167	0.937703	0.925589	0.949924	0.949167
Septin3	Common MN genes	0.986056	0.837855	0.959248	0.988001	0.955464	0.971138	0.971895	0.972327	0.966058	0.984209	0.973069	0.966039	0.950573	0.987454	0.976422	0.96896	0.979559
Serbp1	Common MN genes	0.950708	0.973516	0.924116	0.981516	0.982596	0.990596	0.913523	0.900443	0.888336	0.962362	0.955873	0.961172	0.931105	0.973178	0.966039	0.965715	0.961497
Serinc1	Common MN genes	0.744892	0.969841	0.870392	0.780672	0.724895	0.489461	0.990488	0.990488	0.993406	0.994917	0.993078	0.99589	0.99708	0.991239	0.991348	0.991564	0.992321
Serpini1	Common MN genes	0.790077	0.77797	0.782402	0.847584	0.729543	0.484488	0.970922	0.962166	0.975786	0.934674	0.924508	0.91737	0.945382	0.864915	0.890764	0.861886	0.875081
Set	Common MN genes	0.948006	0.956005	0.922711	0.963463	0.964544	0.979245	0.91936	0.941628	0.937304	0.973827	0.963444	0.965607	0.975341	0.959442	0.96777	0.960632	0.957279
Setd5	Common MN genes	0.814507	0.959356	0.789104	0.867474	0.831586	0.766944	0.904227	0.909199	0.884229	0.749081	0.794722	0.739563	0.741726	0.852477	0.801752	0.796777	0.811702
Sf3a3	Common MN genes	0.891255	0.871257	0.537131	0.926927	0.959464	0.940223	0.685007	0.731056	0.706086	0.941056	0.927861	0.932511	0.923967	0.965174	0.956522	0.930673	0.954142
Sf3b1	Common MN genes	0.891579	0.949843	0.861745	0.883904	0.835045	0.749432	0.920225	0.921198	0.919901	0.955224	0.953061	0.953818	0.959658	0.966688	0.964201	0.963552	0.969608
Sfpq	Common MN genes	0.963247	0.963463	0.957734	0.961842	0.954816	0.925197	0.96822	0.969193	0.973624	0.976098	0.974043	0.975773	0.966364	0.984318	0.981181	0.982912	0.979126
Sfswap	Common MN genes	0.905524	0.887472	0.900984	0.931143	0.905308	0.855583	0.703383	0.707599	0.707599	0.897902	0.891845	0.871079	0.865347	0.90623	0.921696	0.882976	0.895631
Sgcb	Common MN genes	0.750405	0.589017	0.821533	0.686845	0.600151	0.609988	0.926386	0.921738	0.935034	0.804456	0.842959	0.843716	0.889466	0.741402	0.795804	0.776768	0.819922
Sgta	Common MN genes	0.707815	0.853854	0.708356	0.855367	0.935683	0.879364	0.81829	0.83818	0.816236	0.796128	0.801752	0.830846	0.779148	0.820355	0.780013	0.801428	0.830089
Sh3bp5	Common MN genes	0.896011	0.851692	0.534753	0.664577	0.886823	0.742514	0.968868	0.965409	0.93244	0.943651	0.929159	0.936838	0.956522	0.886654	0.921371	0.906987	0.918127
Sh3glb1	Common MN genes	0.87677	0.790617	0.969301	0.888553	0.809426	0.95795	0.992109	0.992866	0.992325	0.957495	0.931754	0.955657	0.968527	0.936729	0.954683	0.948951	0.95544
Sh3kbp1	Common MN genes	0.485137	0.898281	0.91028	0.845206	0.847692	0.628256	0.846611	0.863799	0.876554	0.860264	0.888276	0.897037	0.877136	0.832035	0.85875	0.889141	0.88157
Sem1	Common MN genes	0.643174	0.790833	0.938601	0.723381	0.621122	0.960977	0.858826	0.879905	0.770187	0.83766	0.809864	0.788882	0.797318	0.788341	0.845339	0.851395	0.796669
Mtrex	Common MN genes	0.78651	0.750405	0.802292	0.80694	0.569884	0.785212	0.886931	0.891363	0.810939	0.761518	0.593121	0.751785	0.792883	0.73913	0.681051	0.7878	0.766818
Skp1a	Common MN genes	0.924008	0.596692	0.985515	0.154686	0.407307	0.428494	0.981516	0.978056	0.983461	0.992754	0.994051	0.993078	0.995133	0.988536	0.989725	0.991997	0.991348
Slc25a3	Common MN genes	0.974922	0.928224	0.916009	0.973084	0.979354	0.637769	0.973949	0.98238	0.977084	0.96658	0.969933	0.973502	0.963768	0.970906	0.976314	0.972637	0.977179
Slc38a2	Common MN genes	0.907902	0.913523	0.913415	0.76035	0.888553	0.938493	0.909523	0.913307	0.905199	0.931971	0.904391	0.916072	0.932295	0.863292	0.89682	0.872485	0.865347
Slc39a10	Common MN genes	0.918928	0.89493	0.814074	0.740244	0.799481	0.811372	0.943141	0.932764	0.946925	0.727558	0.689379	0.713281	0.72507	0.735129	0.742808	0.696193	0.761951
Slc39a6	Common MN genes	0.824127	0.887255	0.956653	0.569236	0.623716	0.510972	0.989839	0.987785	0.99146	0.790504	0.897794	0.873351	0.832793	0.781743	0.795263	0.845879	0.793424
Slc49a4	Common MN genes	0.855043	0.793103	0.912118	0.824668	0.925197	0.680143	0.7984	0.839801	0.780132	0.858642	0.718905	0.691975	0.75146	0.788774	0.759031	0.671534	0.761302
Slc5a7	Common MN genes	0.939898	0.839044	0.856448	0.485353	0.520052	0.671063	0.987461	0.989839	0.989623	0.935864	0.959226	0.942137	0.882652	0.838849	0.829332	0.919533	0.855721
Slc6a15	Common MN genes	0.816885	0.649768	0.833315	0.82564	0.534753	0.665766	0.867582	0.861637	0.900659	0.806295	0.818624	0.809431	0.832144	0.725719	0.750919	0.792126	0.766926
Slc6a6	Common MN genes	0.976111	0.896119	0.965193	0.965409	0.996865	0.961301	0.766296	0.81883	0.8211	0.684512	0.710686	0.757192	0.685486	0.636924	0.702682	0.739996	0.749297
Slit2	Common MN genes	0.985839	0.972652	0.980543	0.954491	0.965733	0.797427	0.987028	0.984975	0.987028	0.974043	0.979234	0.978477	0.970906	0.962362	0.961929	0.980857	0.973718
Slk	Common MN genes	0.843044	0.793212	0.535402	0.844774	0.964977	0.707923	0.774943	0.786185	0.709437	0.804564	0.735561	0.714039	0.710145	0.788882	0.802834	0.767251	0.781203
Sltm	Common MN genes	0.856016	0.85688	0.71722	0.94833	0.848881	0.940871	0.727921	0.781321	0.785321	0.91499	0.836037	0.84934	0.834199	0.933485	0.907311	0.887627	0.919316
Smad1	Common MN genes	0.719598	0.772241	0.68652	0.906929	0.928332	0.762836	0.773214	0.714625	0.713761	0.874757	0.868916	0.859723	0.846636	0.893359	0.869782	0.864806	0.892927
Smap1	Common MN genes	0.948546	0.848989	0.944006	0.943574	0.936764	0.981624	0.842936	0.846719	0.849854	0.894765	0.849232	0.847285	0.859291	0.873026	0.868808	0.836578	0.875406
Smarcad1	Common MN genes	0.837855	0.69906	0.814939	0.701438	0.568911	0.860448	0.738299	0.775808	0.74846	0.709712	0.739671	0.782392	0.785637	0.689596	0.766602	0.786935	0.720744
Smarcc1	Common MN genes	0.767052	0.862609	0.906497	0.808886	0.869203	0.853421	0.878932	0.873311	0.898389	0.946896	0.913801	0.927536	0.902985	0.971772	0.955765	0.957603	0.941488
Smarce1	Common MN genes	0.928008	0.979894	0.896011	0.90855	0.971138	0.964652	0.822289	0.793968	0.696141	0.958252	0.953385	0.956954	0.9496	0.97069	0.967878	0.964201	0.968202
Smc3	Common MN genes	0.718085	0.902713	0.766187	0.876878	0.87396	0.7717	0.927251	0.93925	0.890174	0.910772	0.861778	0.900498	0.923751	0.898226	0.912611	0.888709	0.890439
Smdt1	Common MN genes	0.559939	0.92844	0.700681	0.582207	0.307642	0.566641	0.930818	0.956978	0.94379	0.848367	0.924075	0.899416	0.934999	0.864049	0.861237	0.863617	0.849448
Smg7	Common MN genes	0.652362	0.75981	0.72457	0.725867	0.953194	0.89493	0.868014	0.90855	0.909739	0.738157	0.744646	0.753407	0.715012	0.806403	0.751785	0.749838	0.783798
Smndc1	Common MN genes	0.764134	0.966814	0.846935	0.809966	0.921306	0.932548	0.807048	0.680575	0.644147	0.930565	0.95079	0.961281	0.948194	0.938676	0.957387	0.960956	0.945274
Smpd3	Common MN genes	0.934818	0.909415	0.91255	0.959572	0.957518	0.969733	0.861528	0.871906	0.878392	0.924724	0.907095	0.903634	0.890223	0.907852	0.9191	0.89098	0.913476
Smu1	Common MN genes	0.801535	0.822938	0.926927	0.921738	0.70868	0.909739	0.771052	0.743487	0.664361	0.832793	0.85756	0.825005	0.858317	0.805862	0.854424	0.837876	0.823924
Snap91	Common MN genes	0.954708	0.987353	0.937736	0.941087	0.970382	0.970598	0.972868	0.969301	0.971246	0.937054	0.941705	0.942678	0.955765	0.901146	0.889141	0.904499	0.917694
Snrpb2	Common MN genes	0.983353	0.995892	0.942168	0.984867	0.974705	0.999135	0.870609	0.864879	0.876122	0.780446	0.877569	0.882111	0.851612	0.782068	0.869457	0.889358	0.83236
Snrpd3	Common MN genes	0.766836	0.638742	0.918928	0.941412	0.988866	0.428494	0.798076	0.84499	0.85234	0.967878	0.959334	0.976422	0.984966	0.928942	0.967229	0.966148	0.957171
Snrpe	Common MN genes	0.975138	0.941628	0.913847	0.811912	0.935575	0.947357	0.841098	0.771268	0.847908	0.957603	0.96074	0.958793	0.950032	0.970041	0.962903	0.964742	0.960956
Snx2	Common MN genes	0.748892	0.738947	0.760242	0.676467	0.397795	0.878716	0.916766	0.920657	0.882391	0.908825	0.854856	0.865455	0.883085	0.895306	0.892386	0.856154	0.896171
Snx6	Common MN genes	0.673008	0.625878	0.889201	0.506216	0.659064	0.428494	0.974273	0.962923	0.978705	0.922345	0.937378	0.954575	0.957711	0.896604	0.929267	0.956414	0.927212
Snx4	Common MN genes	0.821641	0.733434	0.880013	0.754081	0.864339	0.813101	0.768457	0.756999	0.686628	0.681159	0.722799	0.735886	0.736967	0.848367	0.807052	0.804456	0.804132
Sod1	Common MN genes	0.995028	0.978056	0.933737	0.993839	0.984002	0.975246	0.887364	0.912118	0.88758	0.982912	0.979126	0.975124	0.973827	0.980532	0.978802	0.971772	0.980208
Sorbs2	Common MN genes	0.915361	0.960329	0.891687	0.815588	0.875149	0.939898	0.847368	0.806183	0.8251	0.910989	0.909366	0.925698	0.913476	0.910772	0.918559	0.925698	0.927644
Sox4	Common MN genes	0.897525	0.955248	0.868987	0.894282	0.913523	0.930278	0.92563	0.916225	0.941087	0.918343	0.922994	0.943327	0.937162	0.953277	0.943327	0.965282	0.949275
Sp3	Common MN genes	0.763377	0.753864	0.816777	0.702411	0.808994	0.773106	0.894174	0.856232	0.866933	0.694138	0.729721	0.69165	0.69814	0.696409	0.694246	0.752542	0.741834
Spcs3	Common MN genes	0.978813	0.977408	0.993298	0.985515	0.983894	0.997838	0.706626	0.716247	0.844125	0.814082	0.638114	0.676833	0.696626	0.63249	0.663746	0.648605	0.703439
Spock1	Common MN genes	0.791806	0.92163	0.664901	0.924873	0.807913	0.790833	0.95341	0.957194	0.940763	0.978261	0.981289	0.980316	0.98302	0.975341	0.975016	0.980532	0.980857
Sqle	Common MN genes	0.984975	0.943249	0.964112	0.92844	0.692141	0.627175	0.941304	0.964869	0.942493	0.757949	0.769522	0.754056	0.762276	0.683971	0.763033	0.768549	0.713065
Srek1	Common MN genes	0.951573	0.956437	0.926062	0.970273	0.976975	0.912658	0.831802	0.86088	0.844449	0.765412	0.765196	0.748215	0.844149	0.746269	0.769738	0.77374	0.815704
Sri	Common MN genes	0.878608	0.951249	0.71322	0.870176	0.845855	0.741109	0.727705	0.71722	0.779916	0.953926	0.954467	0.911529	0.945923	0.889141	0.911962	0.922561	0.925914
Srp14	Common MN genes	0.783375	0.911901	0.486326	0.607502	0.555183	0.483948	0.977624	0.983569	0.975462	0.903418	0.917045	0.8435	0.83355	0.91034	0.8992	0.925914	0.864806
Srp19	Common MN genes	0.950816	0.600151	0.819587	0.937845	0.854394	0.428494	0.896984	0.869203	0.770511	0.850638	0.657906	0.744106	0.82122	0.742375	0.743457	0.754597	0.744214
Srp72	Common MN genes	0.942925	0.916658	0.985083	0.569344	0.738947	0.428494	0.941844	0.95114	0.93925	0.764547	0.777093	0.769955	0.72626	0.830846	0.817543	0.806078	0.788125
Srpk1	Common MN genes	0.913307	0.771376	0.864447	0.905091	0.577127	0.686412	0.792563	0.769755	0.754405	0.853018	0.83766	0.88514	0.845879	0.812568	0.84642	0.875946	0.828034
Srrm1	Common MN genes	0.97784	0.966166	0.967139	0.967139	0.978056	0.907578	0.915252	0.86823	0.88585	0.939217	0.939109	0.937703	0.938352	0.958036	0.954359	0.93262	0.935323
Srsf1	Common MN genes	0.906172	0.899687	0.821749	0.972219	0.951789	0.785321	0.971571	0.963247	0.968436	0.989509	0.989185	0.992213	0.992537	0.98886	0.991131	0.992429	0.99005
Srsf11	Common MN genes	0.951681	0.889417	0.791806	0.886391	0.883148	0.811804	0.929737	0.935034	0.933953	0.929699	0.916072	0.933809	0.930456	0.945165	0.950249	0.94257	0.955657
Srsf3	Common MN genes	0.945195	0.972435	0.949627	0.966382	0.965301	0.984542	0.907253	0.917955	0.900227	0.989293	0.987778	0.989293	0.982695	0.995025	0.99297	0.991888	0.991239
Ssb	Common MN genes	0.879689	0.727165	0.770727	0.829964	0.812993	0.827154	0.986164	0.985407	0.982813	0.854748	0.802185	0.818083	0.851071	0.756111	0.832793	0.712092	0.756111
Ssr2	Common MN genes	0.921414	0.907902	0.552373	0.893201	0.870825	0.893417	0.90855	0.936223	0.952329	0.856154	0.785421	0.791153	0.686243	0.894982	0.840904	0.836254	0.897253
St13	Common MN genes	0.967679	0.928873	0.942601	0.936655	0.968436	0.833423	0.911361	0.903146	0.894066	0.906122	0.825546	0.877677	0.90093	0.874432	0.904391	0.842959	0.845987
St6gal2	Common MN genes	0.95914	0.892336	0.904875	0.891795	0.913739	0.646633	0.88358	0.896876	0.871041	0.851503	0.894982	0.865888	0.878867	0.832144	0.8382	0.881354	0.838308
St8sia1	Common MN genes	0.942385	0.741325	0.841314	0.84326	0.880229	0.868555	0.852124	0.874392	0.87396	0.933701	0.941596	0.947653	0.939109	0.961172	0.945706	0.962254	0.952953
Stau1	Common MN genes	0.990379	0.988542	0.981516	0.989298	0.989298	0.956545	0.783591	0.789969	0.880121	0.979126	0.976206	0.979991	0.989401	0.968419	0.977612	0.968094	0.970474
Stmn1	Common MN genes	0.999243	0.999027	0.999243	0.999243	0.997838	0.996433	0.739271	0.899795	0.842828	0.999892	0.999676	0.999676	0.999676	0.999459	0.999567	0.999676	0.999676
Stmn3	Common MN genes	0.996325	0.998487	0.997298	0.994163	0.991785	0.792022	0.996433	0.996	0.992541	0.96896	0.954575	0.93846	0.91737	0.95782	0.94257	0.905473	0.966688
Strap	Common MN genes	0.864879	0.804237	0.879472	0.746298	0.491839	0.929413	0.983353	0.979137	0.977948	0.908934	0.902336	0.908501	0.910664	0.898118	0.920398	0.910664	0.905364
Stt3b	Common MN genes	0.911145	0.891687	0.846719	0.737218	0.761972	0.44579	0.964436	0.961085	0.958599	0.882976	0.917586	0.898551	0.916613	0.876163	0.915098	0.880597	0.902228
Suclg1	Common MN genes	0.980651	0.504378	0.849422	0.949735	0.924657	0.85915	0.752351	0.748027	0.788671	0.777201	0.84761	0.825546	0.789314	0.747567	0.765737	0.813217	0.773416
Sugt1	Common MN genes	0.741001	0.919036	0.765323	0.688034	0.698087	0.428494	0.787915	0.689979	0.680143	0.890115	0.909691	0.8939	0.904932	0.8939	0.895198	0.859399	0.866104
Sult4a1	Common MN genes	0.960653	0.902821	0.992217	0.910712	0.947249	0.428494	0.80294	0.894282	0.836558	0.881679	0.903634	0.838417	0.881354	0.723989	0.738157	0.772226	0.751244
Supt6	Common MN genes	0.922603	0.947573	0.874608	0.973733	0.962815	0.944979	0.83137	0.875149	0.803481	0.808782	0.828899	0.805538	0.77493	0.866537	0.776336	0.840255	0.825762
Surf4	Common MN genes	0.961842	0.838396	0.870825	0.948654	0.964004	0.948762	0.870176	0.832018	0.845855	0.862319	0.835605	0.871512	0.831603	0.877893	0.891413	0.847502	0.870539
Syncrip	Common MN genes	0.900876	0.806291	0.646092	0.787482	0.758621	0.76662	0.92336	0.910064	0.910929	0.855289	0.829981	0.846312	0.83647	0.864266	0.867402	0.833333	0.831927
Synrg	Common MN genes	0.647606	0.938601	0.669225	0.757107	0.744244	0.731597	0.855799	0.847044	0.820128	0.799265	0.727558	0.743132	0.745836	0.771685	0.753839	0.782717	0.767575
Syt1	Common MN genes	0.972652	0.922927	0.928656	0.930926	0.910929	0.958599	0.954708	0.953519	0.958059	0.866537	0.869565	0.883085	0.885031	0.813325	0.830197	0.839282	0.88687
Taf13	Common MN genes	0.460491	0.970814	0.701221	0.83191	0.757107	0.543401	0.777862	0.709761	0.853962	0.846312	0.862643	0.874865	0.844473	0.886221	0.868916	0.886762	0.869241
Taf15	Common MN genes	0.951357	0.929197	0.908226	0.96595	0.942277	0.814074	0.89266	0.933953	0.905848	0.96777	0.956197	0.973718	0.96658	0.97599	0.973178	0.977071	0.975233
Taf2	Common MN genes	0.600692	0.791158	0.843368	0.839801	0.874284	0.85688	0.737001	0.826505	0.775376	0.820896	0.832252	0.864482	0.840904	0.838092	0.870647	0.848908	0.849665
Tagln3	Common MN genes	0.876662	0.909091	0.893741	0.831045	0.895146	0.567614	0.948438	0.947789	0.957842	0.995349	0.9947	0.997296	0.996323	0.996431	0.996106	0.996864	0.996539
Taldo1	Common MN genes	0.93979	0.931034	0.981407	0.973841	0.845422	0.995568	0.641877	0.785212	0.778619	0.949708	0.935215	0.923318	0.909258	0.938352	0.937703	0.933593	0.935864
Tax1bp1	Common MN genes	0.923468	0.802832	0.917198	0.814074	0.814831	0.778835	0.86996	0.883904	0.843368	0.930132	0.917262	0.934134	0.943651	0.911097	0.92029	0.91618	0.919208
Tbc1d19	Common MN genes	0.623176	0.781753	0.890174	0.648795	0.529672	0.840125	0.947249	0.945519	0.934169	0.848151	0.901795	0.875406	0.866321	0.760437	0.83409	0.840688	0.843824
Tbca	Common MN genes	0.975354	0.734191	0.973624	0.969301	0.988109	0.717328	0.988542	0.991028	0.988109	0.923426	0.875406	0.895306	0.948518	0.854748	0.870214	0.864049	0.842418
Tbl1xr1	Common MN genes	0.900011	0.695384	0.891255	0.735704	0.783267	0.620041	0.763053	0.741217	0.757432	0.833009	0.827709	0.851936	0.86989	0.847177	0.818083	0.821761	0.82295
Tcea1	Common MN genes	0.855475	0.783591	0.585883	0.81602	0.653659	0.805643	0.82564	0.798076	0.764674	0.809431	0.671858	0.734047	0.756976	0.707225	0.751568	0.628704	0.720636
Tcerg1	Common MN genes	0.940006	0.852232	0.802075	0.928981	0.884121	0.953194	0.868663	0.857421	0.862285	0.865023	0.842743	0.849773	0.827385	0.910015	0.890655	0.877677	0.894441
Tcp1	Common MN genes	0.975894	0.984434	0.98011	0.984326	0.979786	0.99373	0.969733	0.949519	0.964761	0.984101	0.983885	0.98594	0.977936	0.983885	0.982803	0.983669	0.982154
Tcp11l1	Common MN genes	0.670414	0.957626	0.692033	0.877851	0.795482	0.69679	0.83191	0.815047	0.747703	0.792343	0.743565	0.713065	0.797101	0.68408	0.65477	0.688081	0.666883
Tent4b	Common MN genes	0.741974	0.714625	0.670738	0.745757	0.413145	0.776781	0.872662	0.799805	0.814074	0.729829	0.719879	0.734588	0.725827	0.691759	0.73156	0.717608	0.701276
Tes	Common MN genes	0.871798	0.776349	0.584045	0.495082	0.481894	0.428494	0.858177	0.848881	0.875473	0.856911	0.941813	0.886762	0.875081	0.82944	0.923859	0.82652	0.755786
Tet2	Common MN genes	0.844882	0.946384	0.911577	0.867906	0.936115	0.786834	0.729435	0.730624	0.744784	0.796236	0.781852	0.772875	0.72334	0.888709	0.8435	0.798291	0.833117
Tfg	Common MN genes	0.969949	0.972327	0.929737	0.932764	0.960437	0.969625	0.976759	0.98465	0.985407	0.78607	0.790396	0.728748	0.717175	0.805646	0.808458	0.765412	0.792451
Tgfbr1	Common MN genes	0.786293	0.813966	0.897633	0.608259	0.587288	0.645876	0.957194	0.935791	0.947573	0.882003	0.841012	0.898659	0.90623	0.908285	0.913152	0.88687	0.904391
Thoc1	Common MN genes	0.72857	0.860231	0.678629	0.897416	0.739271	0.428494	0.731921	0.696681	0.78705	0.817651	0.791802	0.81008	0.77201	0.83528	0.813	0.841553	0.818624
Tia1	Common MN genes	0.912118	0.819047	0.9506	0.91655	0.92563	0.967463	0.83645	0.780997	0.798076	0.946788	0.943111	0.944949	0.933917	0.963984	0.954034	0.969825	0.956846
Tial1	Common MN genes	0.788239	0.829532	0.620365	0.563831	0.778294	0.565669	0.896227	0.892336	0.9012	0.897469	0.881462	0.888709	0.906987	0.872053	0.915315	0.887086	0.912827
Timm13	Common MN genes	0.969409	0.959788	0.662847	0.489893	0.73765	0.428494	0.840125	0.823154	0.770403	0.754488	0.788774	0.660394	0.689163	0.829007	0.731019	0.785745	0.762167
Tjp1	Common MN genes	0.698627	0.745541	0.943033	0.966058	0.954708	0.976975	0.853097	0.84099	0.834288	0.744106	0.733182	0.731992	0.737292	0.844149	0.829007	0.801644	0.807701
Tkt	Common MN genes	0.973624	0.944006	0.992433	0.982056	0.975246	0.99146	0.686196	0.702302	0.745757	0.938892	0.925373	0.911746	0.923426	0.919965	0.934999	0.909691	0.94019
Tmed7	Common MN genes	0.855907	0.84953	0.77851	0.618852	0.727597	0.855475	0.84499	0.825316	0.819371	0.945923	0.957387	0.964633	0.97891	0.892819	0.933268	0.968743	0.957495
Tmeff2	Common MN genes	0.963139	0.957842	0.534537	0.929521	0.940547	0.878824	0.988326	0.988109	0.985839	0.983777	0.991888	0.98475	0.978369	0.979342	0.97188	0.978693	0.975881
Tmem131	Common MN genes	0.820884	0.904551	0.767917	0.576262	0.760242	0.735272	0.912658	0.911793	0.917522	0.883085	0.892061	0.904824	0.899524	0.906554	0.913043	0.906013	0.90677
Tmem30a	Common MN genes	0.880013	0.806832	0.934494	0.896119	0.777429	0.969517	0.980975	0.974705	0.974165	0.909366	0.902877	0.918127	0.95133	0.836145	0.901146	0.870539	0.889358
Tmem35a	Common MN genes	0.878175	0.98238	0.866933	0.956221	0.966814	0.69506	0.865636	0.894714	0.850178	0.863076	0.82706	0.800995	0.791586	0.823491	0.858317	0.739455	0.854315
Tmem50a	Common MN genes	0.969517	0.943033	0.865744	0.966598	0.967031	0.934818	0.845206	0.882391	0.902065	0.932079	0.945923	0.931754	0.954142	0.905581	0.932728	0.959009	0.910015
Maco1	Common MN genes	0.64393	0.881959	0.845638	0.700573	0.697762	0.527186	0.826073	0.835585	0.7757	0.869457	0.896604	0.88395	0.87454	0.905689	0.87043	0.896063	0.895198
Tmem59	Common MN genes	0.8211	0.934385	0.965733	0.923035	0.868339	0.428494	0.939034	0.909848	0.942385	0.896388	0.904607	0.915423	0.930997	0.841986	0.850097	0.933701	0.906122
Tmem63b	Common MN genes	0.938926	0.731921	0.824451	0.870933	0.884013	0.843476	0.835261	0.9279	0.865636	0.727774	0.755137	0.707117	0.6618	0.81127	0.697383	0.711659	0.763898
Tmem65	Common MN genes	0.923252	0.941412	0.398227	0.530753	0.831802	0.93471	0.916225	0.923252	0.935466	0.943868	0.935864	0.93435	0.961172	0.78369	0.898334	0.834631	0.881679
Tmem9b	Common MN genes	0.791266	0.681548	0.817317	0.88985	0.593774	0.684034	0.89439	0.938493	0.888553	0.821977	0.776876	0.862427	0.794938	0.810945	0.85464	0.867078	0.901038
Tmf1	Common MN genes	0.725003	0.732678	0.778186	0.604259	0.65074	0.718733	0.907794	0.910496	0.91255	0.781743	0.766277	0.743024	0.773956	0.774389	0.773091	0.758923	0.769089
Tmsb4x	Common MN genes	0.996541	0.971463	0.982921	0.978165	0.898822	0.992974	0.999784	0.999784	0.999784	1	0.999892	0.999784	0.999892	1	0.999892	0.999784	0.999892
Tnfrsf21	Common MN genes	0.85634	0.936547	0.845746	0.896011	0.846611	0.953519	0.928008	0.937088	0.928116	0.749621	0.756111	0.711551	0.70809	0.790937	0.689271	0.790396	0.732425
Tnks2	Common MN genes	0.86769	0.824776	0.664685	0.601989	0.700249	0.752675	0.889634	0.892228	0.889309	0.749405	0.817867	0.790396	0.786394	0.727666	0.726909	0.77666	0.763357
Tnrc6b	Common MN genes	0.797427	0.95514	0.823695	0.951681	0.929305	0.990488	0.744676	0.745109	0.824343	0.754056	0.730694	0.70106	0.705494	0.817435	0.776876	0.73156	0.758923
Tnrc6c	Common MN genes	0.894714	0.899795	0.8211	0.936547	0.91255	0.935791	0.765863	0.74446	0.70414	0.874216	0.858858	0.841229	0.841337	0.919857	0.890223	0.884923	0.89682
Tollip	Common MN genes	0.871365	0.845963	0.941844	0.915901	0.764458	0.761755	0.686845	0.793644	0.63658	0.913584	0.899091	0.869241	0.935972	0.809864	0.853775	0.82003	0.842094
Tomm20	Common MN genes	0.989407	0.640579	0.922603	0.942168	0.930818	0.999568	0.796022	0.813317	0.840342	0.921588	0.884166	0.900606	0.910772	0.903958	0.930781	0.903958	0.921588
Tomm7	Common MN genes	0.984218	0.663172	0.680467	0.920657	0.932332	0.428494	0.907902	0.841531	0.90347	0.987778	0.988211	0.984642	0.984642	0.985075	0.983885	0.984534	0.985832
Tomm70a	Common MN genes	0.898714	0.944222	0.872446	0.812345	0.82791	0.922819	0.95741	0.953302	0.955897	0.874324	0.867186	0.845879	0.839174	0.860264	0.857668	0.862643	0.881354
Top1	Common MN genes	0.937088	0.902605	0.969517	0.876554	0.961193	0.982272	0.87904	0.866285	0.866501	0.909907	0.872485	0.865996	0.861562	0.942029	0.912178	0.901579	0.880705
Tpp2	Common MN genes	0.770079	0.917847	0.675819	0.532807	0.785104	0.908442	0.910604	0.893633	0.890498	0.891413	0.895522	0.919425	0.908609	0.881895	0.903093	0.913584	0.879191
Tpr	Common MN genes	0.926386	0.778294	0.956545	0.960437	0.932548	0.905091	0.964761	0.967139	0.976867	0.919533	0.873134	0.897361	0.883301	0.943002	0.926238	0.914774	0.926022
Tprgl	Common MN genes	0.849314	0.832775	0.865852	0.940006	0.96368	0.428494	0.939358	0.930062	0.926062	0.800238	0.778066	0.740861	0.764439	0.723124	0.809756	0.715877	0.747783
Tra2a	Common MN genes	0.901308	0.900119	0.936223	0.717112	0.873635	0.676143	0.936439	0.931791	0.945303	0.982803	0.978045	0.98356	0.991456	0.977071	0.981614	0.972853	0.976963
Tra2b	Common MN genes	0.807156	0.664469	0.904335	0.717652	0.547616	0.50935	0.734515	0.782726	0.764782	0.978369	0.975449	0.980857	0.979667	0.983777	0.983993	0.983236	0.983777
Trappc11	Common MN genes	0.886174	0.650092	0.644038	0.54459	0.677116	0.448708	0.776349	0.785645	0.84326	0.756868	0.817218	0.773416	0.800671	0.703547	0.773848	0.793965	0.774389
Trib2	Common MN genes	0.96195	0.905199	0.907469	0.9466	0.892876	0.919576	0.929305	0.91709	0.916225	0.970798	0.968527	0.968635	0.973718	0.961389	0.96896	0.963984	0.967229
Trim2	Common MN genes	0.91936	0.934169	0.836882	0.89039	0.883472	0.808237	0.957302	0.957302	0.952978	0.960956	0.950573	0.954142	0.94841	0.951438	0.956305	0.939758	0.958144
Trim33	Common MN genes	0.861096	0.776132	0.821641	0.597557	0.526646	0.789104	0.909199	0.8745	0.896444	0.719771	0.740969	0.755246	0.635951	0.795047	0.754488	0.715336	0.709712
Trim37	Common MN genes	0.639066	0.822073	0.706626	0.446979	0.793644	0.775484	0.913955	0.900876	0.893741	0.8939	0.899957	0.899849	0.887411	0.902336	0.862751	0.882111	0.891088
Trip12	Common MN genes	0.858934	0.784348	0.720355	0.955789	0.880986	0.813534	0.911793	0.911145	0.900119	0.912503	0.90796	0.925265	0.912611	0.92851	0.932836	0.935972	0.929591
Tsc22d1	Common MN genes	0.864663	0.868014	0.946384	0.696681	0.910388	0.531618	0.948006	0.941412	0.955032	0.981614	0.965282	0.97653	0.98475	0.941921	0.966472	0.955008	0.968527
Tsg101	Common MN genes	0.787915	0.897957	0.874716	0.560804	0.956545	0.865204	0.892876	0.895795	0.863907	0.925265	0.904932	0.890655	0.898118	0.906338	0.925265	0.879948	0.901255
Tshz2	Common MN genes	0.837639	0.666739	0.669333	0.938709	0.904443	0.944763	0.800886	0.788347	0.782186	0.856695	0.837551	0.858966	0.858425	0.832793	0.82295	0.756327	0.856154
Tsn	Common MN genes	0.850395	0.759269	0.616798	0.783267	0.534213	0.633553	0.740028	0.738407	0.697654	0.904391	0.919208	0.935972	0.947112	0.951114	0.957711	0.954467	0.942678
Tspan3	Common MN genes	0.958275	0.700681	0.843476	0.948114	0.974922	0.870068	0.877743	0.913523	0.875689	0.98064	0.983128	0.987995	0.990807	0.977828	0.983452	0.988968	0.986913
Ttc1	Common MN genes	0.826721	0.799157	0.836558	0.26289	0.43098	0.661442	0.930386	0.859583	0.833099	0.855721	0.808782	0.85345	0.816353	0.837227	0.869133	0.846853	0.878326
Ttc3	Common MN genes	0.791914	0.80067	0.772673	0.709869	0.708896	0.612258	0.996541	0.996325	0.996	0.856262	0.855938	0.87454	0.89974	0.845663	0.857019	0.843392	0.833658
Ttyh3	Common MN genes	0.877202	0.836882	0.747379	0.822722	0.856232	0.87677	0.654091	0.692682	0.757972	0.93554	0.957711	0.956846	0.952196	0.95425	0.965823	0.963227	0.960632
Tubb5	Common MN genes	0.997298	0.991352	0.996649	0.997622	0.996973	0.996757	0.999243	0.998919	0.998595	0.992862	0.993835	0.99178	0.98713	0.995782	0.992754	0.994484	0.994809
Tubb3	Common MN genes	0.996109	0.99827	0.988217	0.988217	0.969625	0.972003	0.998054	0.998162	0.99773	0.99416	0.992645	0.990807	0.987238	0.993619	0.988427	0.993186	0.99416
Tubb4b	Common MN genes	0.999135	0.998703	0.998811	0.996	0.994487	0.996865	0.983894	0.988001	0.981407	0.978693	0.980208	0.977071	0.95782	0.979775	0.977936	0.96539	0.974259
Tulp4	Common MN genes	0.594963	0.800346	0.774727	0.755486	0.722408	0.708248	0.824451	0.85915	0.849638	0.907528	0.919857	0.909799	0.914666	0.921047	0.891629	0.896388	0.905473
Txn1	Common MN genes	0.989947	0.953519	0.967463	0.974597	0.964112	0.918495	0.994811	0.996973	0.997406	0.993511	0.993619	0.9947	0.996972	0.994268	0.989617	0.997729	0.993727
Txn2	Common MN genes	0.614528	0.664685	0.857421	0.866501	0.914604	0.574965	0.681332	0.719274	0.795482	0.907744	0.865347	0.832684	0.829007	0.95133	0.897685	0.873351	0.923967
Txndc17	Common MN genes	0.856664	0.734623	0.789752	0.985083	0.600043	0.950492	0.990055	0.983786	0.976219	0.947437	0.912935	0.936621	0.954359	0.752217	0.881679	0.853342	0.880273
Uba2	Common MN genes	0.795373	0.719382	0.918279	0.749	0.359313	0.62804	0.689223	0.8024	0.754297	0.905256	0.888384	0.913584	0.916937	0.847826	0.904067	0.883734	0.903093
Ubb	Common MN genes	0.990055	0.994163	0.986704	0.989082	0.957842	0.952546	0.922495	0.883796	0.810507	0.996215	0.99708	0.995674	0.996215	0.996972	0.996431	0.996972	0.996864
Ube2a	Common MN genes	0.819155	0.732569	0.761215	0.900011	0.955032	0.428494	0.902281	0.916441	0.919684	0.950898	0.970257	0.972853	0.972745	0.935432	0.961389	0.967229	0.91034
Ube2h	Common MN genes	0.928981	0.955356	0.987353	0.976543	0.964436	0.882499	0.762404	0.746406	0.746838	0.928834	0.883734	0.901904	0.871836	0.923426	0.926671	0.91499	0.923102
Ube2k	Common MN genes	0.796563	0.45314	0.929845	0.485353	0.474868	0.682305	0.839693	0.833315	0.862826	0.927753	0.941921	0.925049	0.940731	0.925481	0.923318	0.904391	0.906662
Ube2l3	Common MN genes	0.985731	0.993514	0.98692	0.969625	0.96822	0.955897	0.83364	0.869852	0.902713	0.930781	0.932511	0.943651	0.964309	0.891196	0.929699	0.922128	0.90915
Ube2n	Common MN genes	0.799481	0.857745	0.73592	0.69052	0.924224	0.428494	0.934818	0.91482	0.931899	0.910231	0.927104	0.920831	0.931754	0.886113	0.912286	0.91791	0.902985
Ube2ql1	Common MN genes	0.914063	0.952654	0.930818	0.947141	0.978165	0.916658	0.992866	0.991677	0.986596	0.980316	0.974151	0.974367	0.973394	0.978802	0.968311	0.96777	0.976855
Ube4b	Common MN genes	0.908226	0.773862	0.804454	0.794617	0.569776	0.847692	0.896336	0.902497	0.927359	0.891845	0.894549	0.906338	0.888492	0.905473	0.882111	0.915747	0.902444
Ubl3	Common MN genes	0.831045	0.812128	0.786618	0.701005	0.845963	0.9279	0.827478	0.833532	0.845206	0.864374	0.849557	0.834631	0.891737	0.749513	0.840147	0.801536	0.819381
Ubp1	Common MN genes	0.761755	0.703708	0.778835	0.332288	0.657767	0.752567	0.875365	0.864339	0.886931	0.739563	0.844365	0.827601	0.845447	0.817759	0.821328	0.885572	0.836578
Ubqln4	Common MN genes	0.972868	0.919252	0.904659	0.912118	0.813642	0.679602	0.658415	0.717544	0.757756	0.807376	0.78196	0.825871	0.80597	0.836362	0.787368	0.813649	0.802185
Ubr5	Common MN genes	0.781861	0.725976	0.90174	0.799373	0.874824	0.843693	0.903362	0.908983	0.897849	0.895631	0.886113	0.910015	0.891196	0.929699	0.914341	0.915856	0.914882
Uchl1	Common MN genes	0.978381	0.976111	0.939358	0.689223	0.605016	0.526321	0.997946	0.99773	0.996649	0.996539	0.997621	0.995566	0.996106	0.99297	0.991023	0.994376	0.992862
Ufm1	Common MN genes	0.959248	0.618636	0.968868	0.348395	0.896768	0.966382	0.696357	0.762188	0.84553	0.794938	0.777525	0.821436	0.88276	0.584793	0.696301	0.69576	0.710145
Ugp2	Common MN genes	0.859258	0.80467	0.867149	0.632148	0.902929	0.516809	0.947681	0.889634	0.930602	0.830305	0.859939	0.824248	0.841878	0.74032	0.80013	0.798075	0.806727
Ulk2	Common MN genes	0.858286	0.935358	0.748135	0.865528	0.952329	0.815479	0.931034	0.899903	0.932764	0.925914	0.916504	0.922886	0.928293	0.926779	0.926347	0.940731	0.933593
Upf2	Common MN genes	0.701005	0.774835	0.778727	0.726516	0.480705	0.88758	0.759485	0.712896	0.676143	0.812784	0.729072	0.759355	0.791477	0.728099	0.739455	0.690353	0.746052
Uqcrb	Common MN genes	0.373473	0.944979	0.815588	0.820776	0.843476	0.576262	0.910172	0.908767	0.835477	0.805862	0.750162	0.78369	0.873783	0.576249	0.687973	0.733615	0.644819
Uqcrc1	Common MN genes	0.832342	0.993622	0.962707	0.665333	0.588045	0.428494	0.813209	0.826181	0.807372	0.921155	0.931213	0.936513	0.900498	0.937378	0.950357	0.944517	0.928942
Uqcrc2	Common MN genes	0.862393	0.801859	0.637985	0.588369	0.223976	0.745217	0.912982	0.923684	0.925305	0.883734	0.914666	0.882976	0.820571	0.90915	0.894008	0.90677	0.90212
Uqcrh	Common MN genes	0.994379	0.994919	0.951249	0.984758	0.988326	0.990704	0.975678	0.975138	0.979029	0.954142	0.971663	0.971447	0.956089	0.968202	0.964417	0.97653	0.966364
Uso1	Common MN genes	0.903902	0.87623	0.777538	0.805535	0.909631	0.730083	0.888444	0.896552	0.889634	0.790288	0.768981	0.720311	0.674021	0.857884	0.811053	0.779364	0.795263
Usp14	Common MN genes	0.792239	0.947141	0.719057	0.752892	0.817533	0.475084	0.88585	0.888877	0.912766	0.960632	0.943435	0.938135	0.9443	0.962038	0.954899	0.948518	0.951006
Usp24	Common MN genes	0.753432	0.73765	0.79332	0.758513	0.761215	0.832342	0.832234	0.851151	0.887364	0.8687	0.896496	0.898118	0.879732	0.866753	0.880597	0.896171	0.890547
Usp34	Common MN genes	0.689007	0.7757	0.694952	0.578424	0.64166	0.948006	0.946817	0.942817	0.942601	0.82944	0.840255	0.841553	0.846853	0.820896	0.854099	0.852152	0.848908
Vapa	Common MN genes	0.97503	0.833856	0.987245	0.954383	0.922387	0.662631	0.954816	0.940871	0.934926	0.943327	0.93727	0.94668	0.964633	0.928726	0.922453	0.924832	0.917262
Vapb	Common MN genes	0.965409	0.983029	0.717436	0.964977	0.979894	0.428494	0.857313	0.883364	0.814398	0.98356	0.982803	0.985507	0.988968	0.979991	0.9801	0.981614	0.976098
Vash2	Common MN genes	0.808777	0.894498	0.911037	0.758945	0.883688	0.806507	0.76662	0.836666	0.877094	0.79894	0.803374	0.709604	0.734372	0.827169	0.817326	0.784988	0.833225
Vat1	Common MN genes	0.953194	0.954491	0.955248	0.976651	0.919901	0.870176	0.912118	0.90401	0.916117	0.935432	0.918884	0.939433	0.906446	0.958685	0.942786	0.959334	0.946788
Vat1l	Common MN genes	0.935142	0.974381	0.971679	0.96822	0.835585	0.756891	0.928548	0.964436	0.933629	0.8634	0.891737	0.877569	0.873567	0.721177	0.753948	0.839498	0.803807
Vbp1	Common MN genes	0.920441	0.955464	0.979678	0.835045	0.804129	0.900443	0.990704	0.987677	0.992974	0.934242	0.948626	0.945923	0.94668	0.921804	0.935756	0.932728	0.930456
Vdac1	Common MN genes	0.881851	0.910064	0.808021	0.874392	0.938817	0.710302	0.979894	0.982056	0.989947	0.865239	0.892278	0.85172	0.892386	0.776985	0.774173	0.806403	0.842526
Vdac2	Common MN genes	0.969084	0.872014	0.902929	0.930602	0.914712	0.595179	0.950276	0.9546	0.964436	0.986372	0.987995	0.988319	0.989293	0.982154	0.985615	0.986805	0.985183
Vezf1	Common MN genes	0.66782	0.711383	0.84326	0.928764	0.875581	0.922387	0.799914	0.797752	0.843476	0.837443	0.833874	0.850422	0.789531	0.907528	0.869565	0.890439	0.893684
Vma21	Common MN genes	0.791482	0.811156	0.925522	0.797643	0.82456	0.852881	0.831586	0.844882	0.87623	0.764222	0.824573	0.826844	0.870322	0.775903	0.817651	0.815812	0.781095
Vps26a	Common MN genes	0.985515	0.983137	0.928224	0.976219	0.908334	0.428494	0.905199	0.940763	0.878283	0.731884	0.845555	0.802185	0.768332	0.752974	0.735994	0.801103	0.714471
Vps29	Common MN genes	0.953519	0.716247	0.865096	0.926386	0.787266	0.967895	0.876446	0.904767	0.898606	0.85053	0.865023	0.881138	0.856262	0.767034	0.851936	0.86048	0.830413
Vps35	Common MN genes	0.769106	0.819911	0.846827	0.875149	0.774078	0.904983	0.945195	0.948546	0.927251	0.931105	0.923426	0.940731	0.937919	0.907636	0.933485	0.925373	0.922128
Vsnl1	Common MN genes	0.931467	0.897849	0.864123	0.88358	0.926062	0.749973	0.965085	0.980651	0.984002	0.730911	0.815488	0.679213	0.797859	0.658014	0.572247	0.567705	0.567813
Vta1	Common MN genes	0.910064	0.801751	0.93471	0.66101	0.945952	0.742947	0.883472	0.882067	0.887039	0.88103	0.837335	0.856046	0.907419	0.717391	0.803807	0.759031	0.776768
Wac	Common MN genes	0.776997	0.875689	0.892552	0.733975	0.687169	0.496595	0.908659	0.915469	0.870609	0.891521	0.875838	0.872269	0.824789	0.906987	0.896279	0.889898	0.888817
Wars	Common MN genes	0.758729	0.928116	0.683818	0.52189	0.535402	0.428494	0.761972	0.836018	0.760134	0.857884	0.880164	0.800346	0.844798	0.777201	0.817867	0.766277	0.834631
Wasf1	Common MN genes	0.880878	0.837747	0.890282	0.797968	0.918928	0.787915	0.94833	0.932332	0.960112	0.894982	0.886437	0.88979	0.897037	0.866645	0.863076	0.870971	0.89271
Wnk1	Common MN genes	0.893741	0.895795	0.886607	0.891471	0.814723	0.906713	0.942709	0.935899	0.938709	0.819057	0.79072	0.796453	0.750162	0.83647	0.816245	0.822518	0.814947
Wnk2	Common MN genes	0.847908	0.96368	0.710085	0.686953	0.700141	0.675386	0.686953	0.764458	0.759377	0.82414	0.808241	0.771901	0.761086	0.851395	0.781635	0.782933	0.8183
Wsb1	Common MN genes	0.872662	0.889958	0.743379	0.513458	0.55194	0.710734	0.991136	0.98919	0.992866	0.987887	0.989401	0.988536	0.99297	0.984858	0.989942	0.98713	0.988319
Wwp1	Common MN genes	0.791698	0.852665	0.733867	0.76208	0.97049	0.658848	0.936872	0.9012	0.917306	0.762816	0.7374	0.779256	0.792234	0.671317	0.716851	0.700952	0.749513
Xbp1	Common MN genes	0.882283	0.893957	0.453248	0.935791	0.83137	0.428494	0.895038	0.893849	0.905956	0.813865	0.856911	0.832468	0.834956	0.757409	0.759572	0.73329	0.682674
Xpot	Common MN genes	0.911469	0.899254	0.739488	0.381472	0.740136	0.936439	0.794184	0.844449	0.816668	0.713822	0.736643	0.772983	0.752866	0.756652	0.782284	0.775254	0.706684
Xpr1	Common MN genes	0.817425	0.845422	0.776457	0.905308	0.900767	0.864447	0.97103	0.97276	0.967247	0.982263	0.990158	0.989401	0.989725	0.982371	0.983777	0.988103	0.984318
Xrn1	Common MN genes	0.859367	0.767593	0.815696	0.872554	0.846179	0.885418	0.735812	0.747271	0.799805	0.755462	0.736427	0.74151	0.780554	0.757625	0.748756	0.781311	0.722258
Xrn2	Common MN genes	0.83818	0.597017	0.818506	0.785645	0.758729	0.719706	0.957518	0.934277	0.943898	0.853126	0.885897	0.867294	0.82652	0.868376	0.873783	0.895955	0.882219
Ybx1	Common MN genes	0.998703	0.990055	0.994919	0.999135	0.998811	0.99827	0.98238	0.985299	0.981624	0.996755	0.996647	0.996864	0.995349	0.998161	0.99708	0.99589	0.996647
Yme1l1	Common MN genes	0.836666	0.868122	0.655605	0.77797	0.889525	0.67744	0.943357	0.91882	0.904875	0.900822	0.902552	0.94138	0.943111	0.854532	0.90212	0.912935	0.8886
Yod1	Common MN genes	0.56675	0.877527	0.912226	0.446114	0.858286	0.467517	0.920982	0.898281	0.912226	0.891088	0.911313	0.891413	0.838417	0.889574	0.870863	0.871296	0.838849
Ythdf3	Common MN genes	0.775268	0.761107	0.951032	0.739812	0.543509	0.819911	0.978813	0.966706	0.961193	0.84761	0.841337	0.872161	0.839931	0.856911	0.868051	0.87281	0.863617
Ywhae	Common MN genes	0.998595	0.999351	0.998703	0.994487	0.995676	0.995352	0.999027	0.999243	0.999351	0.972096	0.973718	0.972421	0.95836	0.971988	0.972637	0.969717	0.973069
Ywhag	Common MN genes	0.995244	0.986812	0.992974	0.985731	0.977948	0.96368	0.996649	0.997406	0.997946	0.990591	0.989293	0.990915	0.992321	0.982479	0.985183	0.986589	0.984642
Ywhah	Common MN genes	0.982921	0.991028	0.97957	0.966706	0.976759	0.994811	0.979678	0.972435	0.976435	0.983669	0.982695	0.975449	0.975773	0.952196	0.964093	0.961172	0.963876
Ywhaz	Common MN genes	0.953735	0.964761	0.941412	0.892876	0.872662	0.951032	0.99546	0.995676	0.996865	0.990699	0.992754	0.991672	0.992429	0.985399	0.98886	0.989725	0.986589
Yy1	Common MN genes	0.898065	0.91201	0.919036	0.882607	0.882823	0.859691	0.784456	0.785321	0.795265	0.766277	0.739239	0.741402	0.7427	0.752001	0.78607	0.649254	0.768765
Zc3h13	Common MN genes	0.885526	0.936115	0.764782	0.967895	0.968328	0.983677	0.734407	0.851908	0.823695	0.97188	0.948194	0.960523	0.943327	0.980316	0.968202	0.959658	0.969284
Zc3h15	Common MN genes	0.858394	0.597341	0.817749	0.806507	0.833856	0.691709	0.940223	0.949195	0.946492	0.922886	0.883842	0.900714	0.887627	0.91737	0.895631	0.904607	0.887411
Zdhhc17	Common MN genes	0.786726	0.970382	0.680791	0.692682	0.526105	0.921522	0.884013	0.850827	0.911577	0.883409	0.896063	0.897685	0.896496	0.869565	0.852801	0.859723	0.880381
Zeb1	Common MN genes	0.929197	0.935791	0.951573	0.949411	0.912874	0.925413	0.853421	0.844017	0.79386	0.885248	0.883193	0.880597	0.864698	0.922886	0.918127	0.900498	0.904932
Zmat2	Common MN genes	0.934494	0.9733	0.784023	0.881202	0.361366	0.828559	0.754297	0.728029	0.680035	0.948302	0.909042	0.932836	0.90212	0.955765	0.940731	0.923535	0.937162
Zmynd11	Common MN genes	0.904118	0.454654	0.975462	0.942601	0.835153	0.94433	0.784996	0.794076	0.823046	0.865347	0.866212	0.863509	0.866212	0.81711	0.881354	0.832684	0.840363
Zfp207	Common MN genes	0.933845	0.988434	0.989082	0.981083	0.841098	0.943249	0.962274	0.968976	0.978056	0.981073	0.979991	0.983885	0.986048	0.982912	0.983344	0.983993	0.982371
Zfp292	Common MN genes	0.799697	0.641552	0.718949	0.775268	0.637661	0.761864	0.954275	0.924981	0.954924	0.917153	0.896279	0.894116	0.895955	0.921912	0.91326	0.887843	0.909691
Zfp326	Common MN genes	0.973192	0.95968	0.952546	0.980867	0.949843	0.884661	0.687601	0.807913	0.740677	0.976422	0.971447	0.977828	0.984534	0.971231	0.974584	0.975665	0.967554
Zfp462	Common MN genes	0.945844	0.965842	0.94152	0.967031	0.975894	0.968003	0.838396	0.833099	0.838612	0.964201	0.938027	0.952844	0.955657	0.977504	0.964958	0.972421	0.972853
Zfp521	Common MN genes	0.909199	0.915685	0.65301	0.790942	0.83364	0.789536	0.802724	0.83137	0.789861	0.909799	0.88979	0.907636	0.894333	0.915098	0.919425	0.905256	0.89974
Zfp608	Common MN genes	0.928548	0.672252	0.880121	0.856772	0.85234	0.868663	0.793644	0.757648	0.786726	0.904175	0.865672	0.900281	0.913909	0.931213	0.917802	0.937919	0.944517
Zfp618	Common MN genes	0.814615	0.732029	0.793536	0.893741	0.804237	0.776024	0.748027	0.695492	0.717112	0.747242	0.751676	0.747458	0.692948	0.797534	0.78077	0.817435	0.777201
Zfp644	Common MN genes	0.757864	0.798508	0.621987	0.601773	0.518863	0.71495	0.823695	0.832342	0.839693	0.827601	0.873567	0.845122	0.855397	0.818841	0.860156	0.777958	0.831387
Zranb1	Common MN genes	0.81883	0.67517	0.829208	0.911901	0.955789	0.915361	0.809534	0.859258	0.815047	0.745295	0.682457	0.781743	0.751676	0.677698	0.719663	0.719771	0.750703
Zranb2	Common MN genes	0.936223	0.788671	0.866177	0.826721	0.918387	0.674197	0.935358	0.936115	0.918495	0.948843	0.931971	0.931322	0.929699	0.944408	0.950681	0.941164	0.947004
Adam19	Skate-Mouse	0.933521	0.721544	0.711707	0.481894	0.794509	0.943898	0.936331	0.932115	0.935791	0.341986	0.239996	0.19814	0.209388	0.249946	0.30424	0.203223	0.234696
Ap2s1	Skate-Mouse	0.954924	0.970165	0.447087	0.637012	0.769971	0.769322	0.911253	0.904659	0.871798	0.243565	0.258058	0.270928	0.169154	0.285745	0.183755	0.220852	0.278499
Camk2n2	Skate-Mouse	0.983137	0.907794	0.875797	0.815155	0.794401	0.529781	0.942601	0.933845	0.937845	0.20517	0.134328	0.251136	0.120052	0.18051	0.141142	0.136924	0.21631
Cbarp	Skate-Mouse	0.841314	0.510431	0.96422	0.883688	0.824127	0.738623	0.749541	0.78932	0.774727	0.204629	0.168289	0.157474	0.201601	0.224854	0.11021	0.112265	0.155635
Cdk5r1	Skate-Mouse	0.989082	0.989731	0.972976	0.980975	0.987677	0.970814	0.916874	0.920549	0.942277	0.2626	0.267034	0.243024	0.356695	0.261735	0.269197	0.397902	0.355505
Ciao1	Skate-Mouse	0.601448	0.935899	0.934385	0.84953	0.859258	0.428494	0.681007	0.819911	0.80921	0.102531	0.161475	0.188622	0.0812243	0.088687	0.0876055	0.138655	0.117781
Cited2	Skate-Mouse	0.952438	0.58999	0.896119	0.824019	0.483515	0.98919	0.757756	0.754837	0.783159	0.402985	0.212416	0.287151	0.209172	0.214796	0.199113	0.194246	0.26141
Ckmt1	Skate-Mouse	0.737434	0.872554	0.754189	0.583721	0.467949	0.428494	0.696465	0.816777	0.769647	0.15066	0.199005	0.0749513	0.178672	0.0790612	0.0825222	0.0681376	0.144603
Dag1	Skate-Mouse	0.902929	0.83364	0.960112	0.752243	0.811588	0.673333	0.788671	0.799914	0.754621	0.260112	0.310513	0.279256	0.249189	0.269522	0.296128	0.273091	0.275687
Dcakd	Skate-Mouse	0.803265	0.90855	0.396498	0.452708	0.799805	0.781645	0.890931	0.906605	0.890823	0.144062	0.0837119	0.102639	0.144387	0.134977	0.107939	0.092148	0.135302
Egr1	Skate-Mouse	0.956978	0.992217	0.953519	0.996757	0.994703	0.988109	0.612042	0.661982	0.839369	0.172723	0.247567	0.163206	0.223124	0.212957	0.195003	0.197923	0.180619
Pcbp3	Skate-Mouse	0.941412	0.662091	0.949519	0.803048	0.806507	0.584477	0.919792	0.853313	0.882715	0.257192	0.31419	0.233182	0.140169	0.192948	0.148388	0.235561	0.25676
Tctex1d2	Skate-Mouse	0.710626	0.980435	0.930602	0.980543	0.851043	0.821857	0.747595	0.82564	0.703708	0.0697599	0.0812243	0.0749513	0.0812243	0.0581873	0.0533204	0.0666234	0.0830629
Tusc2	Skate-Mouse	0.881202	0.640471	0.96595	0.416604	0.667712	0.672576	0.860988	0.851692	0.905308	0.185594	0.197707	0.147523	0.170236	0.137789	0.140493	0.139087	0.158988
Gprin1	Skate-Mouse	0.80467	0.636904	0.876554	0.610853	0.239109	0.477354	0.786834	0.750513	0.747379	0.0697599	0.0812243	0.0749513	0.14125	0.0791694	0.0703007	0.0666234	0.0504002
Csnk2b	Skate-Mouse	0.911037	0.966706	0.971571	0.780348	0.888444	0.987677	0.860015	0.906497	0.834396	0.0697599	0.0812243	0.0749513	0.0812243	0.186459	0.291694	0.0666234	0.0504002
Dbnl	Skate-Mouse	0.662847	0.896336	0.878067	0.877419	0.517025	0.812128	0.848233	0.799589	0.752459	0.169911	0.344798	0.21101	0.0812243	0.343392	0.268332	0.280121	0.36578
Fis1	Skate-Mouse	0.859907	0.411523	0.838612	0.240731	0.46222	0.428494	0.866393	0.818182	0.893309	0.11432	0.117348	0.0749513	0.0812243	0.128272	0.0710578	0.146225	0.0950681
Agpat1	Skate-Mouse	0.863582	0.693006	0.867798	0.85915	0.776132	0.428494	0.878175	0.853205	0.869203	0.0700844	0.0834956	0.110859	0.16061	0.0618646	0.0533204	0.140709	0.0765737
Trir	Skate-Mouse	0.843584	0.545779	0.927359	0.902173	0.479948	0.558967	0.894714	0.894066	0.820668	0.0735453	0.104802	0.0868484	0.0812243	0.0681376	0.0738698	0.0666234	0.101449
Tbcb	Skate-Mouse	0.952978	0.951681	0.746622	0.923143	0.932007	0.979354	0.965733	0.983677	0.98411	0.23156	0.215445	0.172074	0.2679	0.280554	0.260437	0.285421	0.250162
Polr2g	Skate-Mouse	0.782186	0.650308	0.983894	0.977732	0.894066	0.918279	0.764674	0.884337	0.892985	0.405581	0.0812243	0.298399	0.225827	0.43965	0.482479	0.158122	0.484534
Esyt1	Skate-Mouse	0.617987	0.904983	0.800994	0.840774	0.696573	0.775268	0.730732	0.745865	0.742839	0.129029	0.133679	0.115401	0.128812	0.139412	0.123513	0.105018	0.0839282
Fjx1	Skate-Mouse	0.654524	0.81829	0.716031	0.858286	0.851584	0.798076	0.761431	0.783699	0.795698	0.257949	0.173048	0.177807	0.0812243	0.32003	0.222258	0.164179	0.291802
Fos	Skate-Mouse	0.661982	0.910496	0.772349	0.955464	0.953302	0.927683	0.932007	0.890174	0.956545	0.25146	0.306186	0.270604	0.278823	0.176076	0.272658	0.205711	0.169911
Fsd1	Skate-Mouse	0.785429	0.891904	0.731705	0.810507	0.529889	0.917198	0.725327	0.802508	0.823479	0.215661	0.222475	0.241077	0.157474	0.216418	0.136059	0.200087	0.196301
Gatm	Skate-Mouse	0.915901	0.903038	0.54913	0.805318	0.842612	0.751054	0.749	0.816128	0.862609	0.208739	0.289639	0.23448	0.269306	0.241942	0.204521	0.196842	0.153255
Asna1	Skate-Mouse	0.89947	0.987137	0.895255	0.670738	0.941304	0.902821	0.928764	0.934494	0.92163	0.244754	0.394008	0.153688	0.245187	0.359399	0.183431	0.346961	0.291694
Git1	Skate-Mouse	0.670198	0.749757	0.729867	0.44179	0.633769	0.885526	0.792995	0.743271	0.687601	0.14947	0.135734	0.195868	0.216634	0.239022	0.181808	0.147631	0.186783
Got2	Skate-Mouse	0.962274	0.919901	0.924441	0.974814	0.834829	0.984758	0.782078	0.732786	0.772349	0.269846	0.347069	0.265953	0.265196	0.258923	0.171642	0.305754	0.253191
Hnrnpul1	Skate-Mouse	0.920333	0.900551	0.907145	0.834937	0.894714	0.941736	0.687277	0.696898	0.732137	0.146982	0.17056	0.118538	0.169154	0.178023	0.109669	0.161259	0.20809
Irf2bpl	Skate-Mouse	0.676684	0.617879	0.885202	0.632796	0.411955	0.725219	0.813317	0.813426	0.841963	0.276228	0.22918	0.269306	0.193056	0.266277	0.209388	0.249513	0.277417
Irx5	Skate-Mouse	0.936439	0.866285	0.938277	0.525781	0.482326	0.428494	0.834504	0.890066	0.855691	0.135518	0.176941	0.0813325	0.139628	0.0976639	0.13249	0.109561	0.121133
Itga3	Skate-Mouse	0.953302	0.865744	0.818722	0.71041	0.702086	0.699708	0.710302	0.73538	0.686737	0.174454	0.229396	0.183323	0.199762	0.165044	0.126974	0.172723	0.133788
Lamtor2	Skate-Mouse	0.9773	0.913631	0.637769	0.727813	0.903254	0.93244	0.708464	0.841963	0.691277	0.30835	0.325871	0.229613	0.236427	0.358317	0.273524	0.247891	0.286502
Lhfpl4	Skate-Mouse	0.96141	0.969409	0.655713	0.752783	0.894606	0.682737	0.665982	0.714842	0.739055	0.245295	0.215769	0.192083	0.176292	0.277201	0.132382	0.207657	0.249838
Map7d1	Skate-Mouse	0.796887	0.962815	0.754621	0.783375	0.641768	0.795482	0.902821	0.86315	0.870068	0.321328	0.280229	0.254597	0.32414	0.353126	0.238914	0.345447	0.308025
Mapk8ip2	Skate-Mouse	0.942709	0.93752	0.836991	0.910929	0.948438	0.958815	0.725651	0.774511	0.802724	0.147199	0.198789	0.179862	0.085875	0.19165	0.151201	0.15066	0.113022
Met	Skate-Mouse	0.915685	0.86942	0.856988	0.32764	0.223976	0.428494	0.843801	0.851584	0.852881	0.302942	0.247134	0.264222	0.27785	0.204305	0.225395	0.219554	0.234912
Midn	Skate-Mouse	0.938601	0.960761	0.956329	0.989623	0.982813	0.95287	0.785753	0.782294	0.798184	0.308025	0.229721	0.236967	0.24324	0.349665	0.252001	0.273307	0.27547
Mrpl20	Skate-Mouse	0.53778	0.821209	0.878608	0.533132	0.317912	0.428494	0.902389	0.939574	0.898173	0.382436	0.219338	0.296885	0.271036	0.347826	0.28369	0.248973	0.379299
Mrpl54	Skate-Mouse	0.624149	0.8972	0.59853	0.344719	0.772998	0.90801	0.756459	0.808994	0.90174	0.0697599	0.0812243	0.0749513	0.0812243	0.0581873	0.0533204	0.0666234	0.0504002
Nefh	Skate-Mouse	0.947573	0.933629	0.889093	0.775051	0.270241	0.514755	0.974922	0.986488	0.984218	0.335821	0.288774	0.176401	0.25027	0.162665	0.192299	0.163098	0.225827
Nudcd3	Skate-Mouse	0.975246	0.926386	0.78705	0.949843	0.796671	0.992325	0.783807	0.690628	0.691385	0.22453	0.185918	0.228099	0.139303	0.194462	0.201709	0.238806	0.242159
Onecut2	Skate-Mouse	0.869311	0.920117	0.740893	0.431953	0.438115	0.732245	0.782402	0.790942	0.801211	0.286935	0.355072	0.314839	0.192299	0.265953	0.228856	0.317867	0.269414
Papolg	Skate-Mouse	0.869095	0.813209	0.812453	0.697762	0.858826	0.874176	0.747703	0.783915	0.774078	0.0697599	0.0812243	0.0749513	0.0920398	0.0581873	0.0540774	0.119079	0.0645685
Pea15a	Skate-Mouse	0.986272	0.97276	0.71268	0.933521	0.911793	0.924224	0.872014	0.884985	0.834072	0.157582	0.168613	0.0947437	0.0812243	0.149578	0.0850097	0.0889033	0.106965
Plppr3	Skate-Mouse	0.855799	0.887796	0.869636	0.795806	0.705113	0.900119	0.709004	0.730408	0.741974	0.237292	0.281635	0.29721	0.243781	0.18462	0.225719	0.287584	0.247999
Polr3k	Skate-Mouse	0.418874	0.903902	0.895146	0.590206	0.397579	0.428494	0.943682	0.956005	0.971354	0.175103	0.0812243	0.0749513	0.0812243	0.109669	0.0533204	0.0666234	0.0709496
Ptpn9	Skate-Mouse	0.86823	0.613123	0.748892	0.904118	0.763593	0.783159	0.893957	0.871041	0.861204	0.246052	0.256976	0.278499	0.258382	0.229396	0.201493	0.191434	0.219663
Pura	Skate-Mouse	0.775808	0.640147	0.749432	0.56556	0.633013	0.652362	0.821857	0.81375	0.825316	0.0697599	0.0812243	0.0749513	0.0812243	0.0581873	0.0533204	0.0666234	0.0504002
Rnf24	Skate-Mouse	0.977408	0.827586	0.981191	0.709977	0.674089	0.849638	0.710626	0.732245	0.667387	0.26141	0.236535	0.157365	0.171534	0.255786	0.215985	0.204196	0.170668
Rps26	Skate-Mouse	0.981407	0.991244	0.956978	0.993406	0.992217	0.97049	0.941736	0.98184	0.975894	0.0697599	0.0812243	0.0749513	0.0812243	0.0581873	0.0533204	0.0666234	0.0504002
Sbk1	Skate-Mouse	0.865744	0.705221	0.77624	0.910064	0.828559	0.70414	0.889201	0.896768	0.929954	0.284015	0.202682	0.241834	0.0812243	0.245079	0.238806	0.224638	0.178347
Sdhc	Skate-Mouse	0.937628	0.424819	0.757215	0.714517	0.223976	0.521998	0.896444	0.926386	0.850935	0.2122	0.241942	0.344473	0.149254	0.300346	0.207549	0.20982	0.17759
Slc20a1	Skate-Mouse	0.790833	0.810399	0.658523	0.745973	0.627824	0.506216	0.757215	0.754189	0.773106	0.109345	0.0859831	0.137789	0.106208	0.0946355	0.102639	0.160718	0.0504002
Snrpn	Skate-Mouse	0.889093	0.901416	0.853746	0.945411	0.70814	0.500595	0.994703	0.993406	0.993514	0.284664	0.23329	0.298724	0.346204	0.277309	0.251785	0.359074	0.270604
Syt2	Skate-Mouse	0.989515	0.9773	0.954275	0.945519	0.929089	0.914604	0.808669	0.803589	0.822506	0.0697599	0.0812243	0.0749513	0.0850097	0.0581873	0.0533204	0.0669479	0.0504002
Tbc1d16	Skate-Mouse	0.657659	0.950708	0.798292	0.616582	0.847908	0.908983	0.71268	0.70868	0.720138	0.334631	0.384166	0.229613	0.244754	0.256543	0.333658	0.275795	0.333441
Tmem127	Skate-Mouse	0.866393	0.842504	0.392498	0.667604	0.825749	0.954816	0.870933	0.875689	0.877959	0.251136	0.207333	0.283474	0.268332	0.234804	0.234263	0.309647	0.32652
Trim28	Skate-Mouse	0.829856	0.844882	0.805967	0.635283	0.700573	0.971679	0.795482	0.777321	0.828775	0.286719	0.252758	0.266385	0.224962	0.329656	0.253407	0.286502	0.278283
Ykt6	Skate-Mouse	0.826613	0.811912	0.795157	0.734948	0.865312	0.82737	0.732569	0.77797	0.793103	0.194354	0.0984209	0.0749513	0.0812243	0.190353	0.0834956	0.138979	0.199762
Zfp638	Skate-Mouse	0.966274	0.798184	0.893633	0.934061	0.89439	0.739488	0.86088	0.864771	0.838828	0.285421	0.270495	0.261194	0.224421	0.314839	0.239888	0.28077	0.286394
Adnp	Skate-Chick	0.828451	0.897741	0.832342	0.922711	0.92336	0.886499	0.234137	0.263107	0.300076	0.975449	0.969284	0.973286	0.975016	0.979559	0.979126	0.974367	0.979451
Arhgdib	Skate-Chick	0.986164	0.980975	0.985407	0.944438	0.865852	0.428494	0.142471	0.130148	0.152416	0.971555	0.963768	0.96658	0.95955	0.976639	0.965174	0.974043	0.970366
Atp23	Skate-Chick	0.42644	0.815804	0.910064	0.915469	0.426981	0.792887	0.266782	0.276943	0.276403	0.881354	0.853018	0.901255	0.922453	0.853126	0.918992	0.894549	0.92732
Atp6v0c	Skate-Chick	0.99546	0.990271	0.992758	0.993298	0.994595	0.981948	0.296617	0.22884	0.241704	0.991456	0.993943	0.992429	0.993294	0.985724	0.987346	0.987346	0.98767
Ccpg1	Skate-Chick	0.61896	0.732245	0.869852	0.597881	0.704681	0.699492	0.171117	0.16863	0.194249	0.762708	0.697923	0.770171	0.760761	0.714363	0.671101	0.711551	0.674129
D1Pas1	Skate-Chick	0.892228	0.953302	0.889525	0.961193	0.939682	0.897741	0.142471	0.130148	0.152416	0.975341	0.974367	0.981614	0.986372	0.974584	0.974475	0.980316	0.979018
Dnaja4	Skate-Chick	0.772889	0.929954	0.869311	0.535834	0.942817	0.920117	0.32083	0.245163	0.196303	0.949924	0.941488	0.917802	0.942678	0.93262	0.952953	0.886978	0.935648
Timm23	Skate-Chick	0.84953	0.559615	0.95687	0.563182	0.678846	0.582964	0.203113	0.239866	0.267863	0.812459	0.852369	0.845987	0.790396	0.828575	0.809107	0.869457	0.857993
Sinhcaf	Skate-Chick	0.440925	0.928764	0.932224	0.789428	0.900876	0.551292	0.17209	0.279321	0.244082	0.825222	0.72626	0.797426	0.739563	0.812027	0.868267	0.783149	0.86751
Fgd3	Skate-Chick	0.906713	0.567398	0.924765	0.926494	0.742082	0.75754	0.142471	0.145282	0.152416	0.948626	0.934026	0.951655	0.958036	0.930781	0.939541	0.928618	0.919965
Gad1	Skate-Chick	0.736029	0.766079	0.711923	0.968976	0.974057	0.913631	0.142471	0.249919	0.156199	0.752433	0.625568	0.714796	0.800887	0.520225	0.650984	0.411421	0.605127
Glcci1	Skate-Chick	0.643606	0.873419	0.652686	0.85234	0.925413	0.534537	0.305048	0.219652	0.252297	0.951438	0.937162	0.952304	0.951871	0.955116	0.96485	0.931754	0.965282
Hoxb3	Skate-Chick	0.923143	0.967787	0.96368	0.95795	0.971679	0.967571	0.216625	0.323857	0.274889	0.972529	0.957603	0.97188	0.953493	0.99005	0.983669	0.979126	0.983236
Impdh2	Skate-Chick	0.846503	0.777213	0.85634	0.924008	0.346233	0.428494	0.316614	0.217598	0.313696	0.816677	0.825114	0.854207	0.717608	0.883409	0.786286	0.793424	0.801536
Lhx5	Skate-Chick	0.922495	0.788455	0.85007	0.944222	0.908226	0.949195	0.142471	0.176954	0.152416	0.798832	0.821869	0.853991	0.840796	0.870755	0.772226	0.912503	0.864157
Mrpl23	Skate-Chick	0.919252	0.705978	0.725976	0.614204	0.672252	0.975354	0.191439	0.148633	0.152416	0.923643	0.871728	0.911205	0.881138	0.8687	0.898767	0.930348	0.911854
Mrps34	Skate-Chick	0.779159	0.662307	0.819263	0.207437	0.460058	0.428494	0.197276	0.17209	0.274457	0.776768	0.820679	0.85756	0.805754	0.785529	0.854748	0.857668	0.858966
Ndufs5	Skate-Chick	0.940439	0.945519	0.629445	0.966922	0.810399	0.816128	0.193601	0.227759	0.350449	0.820787	0.826736	0.690677	0.646117	0.911854	0.785313	0.86578	0.800995
Npepl1	Skate-Chick	0.875581	0.615933	0.887364	0.801211	0.682305	0.428494	0.142471	0.130148	0.194357	0.79602	0.827385	0.809539	0.687541	0.757517	0.757517	0.701384	0.776011
Nxt2	Skate-Chick	0.727273	0.621663	0.961301	0.93017	0.223976	0.642093	0.267971	0.270349	0.228083	0.778391	0.729288	0.753731	0.818949	0.706684	0.775038	0.673048	0.714796
Pax2	Skate-Chick	0.902173	0.422549	0.886823	0.918711	0.981948	0.936764	0.142471	0.147335	0.152416	0.981722	0.975665	0.981938	0.982912	0.987778	0.984426	0.983128	0.98594
Gatd1	Skate-Chick	0.919684	0.870068	0.903146	0.425035	0.945195	0.428494	0.342233	0.249378	0.293698	0.86751	0.875081	0.840796	0.869457	0.784664	0.797101	0.859291	0.746593
Pin4	Skate-Chick	0.959788	0.87169	0.989731	0.579289	0.533672	0.428494	0.317371	0.314344	0.267539	0.845122	0.786935	0.827493	0.751568	0.823059	0.766818	0.873026	0.796128
Polr2c	Skate-Chick	0.949735	0.996	0.980326	0.832991	0.97276	0.973084	0.275538	0.220084	0.338018	0.85637	0.867294	0.849232	0.780013	0.858317	0.841445	0.866537	0.846204
Rpl23a	Skate-Chick	0.997946	0.994379	0.990812	0.99546	0.994811	0.998162	0.239974	0.28732	0.233272	0.999135	0.998161	0.997729	0.996647	0.999027	0.998918	0.998053	0.999027
Rps2	Skate-Chick	0.967571	0.985191	0.965085	0.991893	0.987785	0.993406	0.350989	0.248946	0.283969	0.988211	0.997404	0.995241	0.995025	0.991997	0.994376	0.996215	0.991456
Sall1	Skate-Chick	0.646417	0.875581	0.859258	0.873527	0.770187	0.891147	0.142471	0.130148	0.152416	0.743673	0.795695	0.764331	0.765304	0.914558	0.897253	0.916613	0.91791
Slc16a3	Skate-Chick	0.945519	0.965085	0.891471	0.97276	0.807372	0.96876	0.176954	0.323533	0.23057	0.85875	0.912611	0.86286	0.895847	0.857668	0.874648	0.876163	0.894008
Sparc	Skate-Chick	0.963463	0.968652	0.989407	0.960545	0.982164	0.976759	0.264836	0.16582	0.335531	0.711984	0.728423	0.70982	0.697383	0.895847	0.946139	0.872594	0.902877
Synpr	Skate-Chick	0.698951	0.714517	0.876986	0.890931	0.490109	0.687709	0.233813	0.247217	0.263431	0.95079	0.959009	0.924616	0.927104	0.938784	0.935864	0.91034	0.946463
Tax1bp3	Skate-Chick	0.955789	0.894822	0.779699	0.881743	0.912118	0.428494	0.205707	0.14539	0.172198	0.931213	0.909907	0.941488	0.936946	0.889682	0.942137	0.919857	0.917586
Ttyh2	Skate-Chick	0.949303	0.504702	0.90347	0.55367	0.753432	0.979462	0.142471	0.153173	0.211112	0.851936	0.789963	0.838741	0.799697	0.862643	0.837227	0.868808	0.860156
Zc3h6	Skate-Chick	0.828235	0.827478	0.883364	0.887255	0.75073	0.94606	0.277916	0.267322	0.152416	0.848259	0.778931	0.803591	0.824681	0.845987	0.822085	0.826952	0.845771
Zeb2	Skate-Chick	0.531942	0.808021	0.829748	0.843584	0.893957	0.79613	0.220841	0.279754	0.22657	0.73156	0.69403	0.710794	0.687432	0.840904	0.810188	0.778499	0.805105
Zfand4	Skate-Chick	0.424927	0.886174	0.804237	0.561345	0.886391	0.56675	0.226138	0.198573	0.329586	0.788125	0.866753	0.892927	0.901146	0.835821	0.828358	0.900065	0.859723
Zfp593	Skate-Chick	0.973084	0.992649	0.978813	0.925522	0.929737	0.760242	0.375095	0.247325	0.273592	0.947653	0.93608	0.900822	0.863292	0.945057	0.954467	0.891953	0.963552
Actr6	Mouse-Chick	0.250459	0.297914	0.320506	0.490433	0.42817	0.428494	0.836882	0.695925	0.689007	0.898983	0.875297	0.871728	0.870214	0.86751	0.893792	0.844906	0.829223
Aimp2	Mouse-Chick	0.229056	0.297914	0.320506	0.154686	0.317695	0.428494	0.72403	0.78024	0.642958	0.73621	0.797534	0.876379	0.878218	0.824681	0.820355	0.848691	0.838957
Arl4a	Mouse-Chick	0.242244	0.314344	0.320506	0.504918	0.258026	0.428494	0.747811	0.781429	0.700141	0.837227	0.748432	0.805213	0.802942	0.712308	0.698248	0.733506	0.738482
Asns	Mouse-Chick	0.229056	0.297914	0.320506	0.154686	0.223976	0.447411	0.953627	0.962815	0.953086	0.844798	0.903201	0.874	0.907528	0.721285	0.820896	0.854964	0.81949
Ccng1	Mouse-Chick	0.229056	0.297914	0.320506	0.154686	0.672035	0.428494	0.978921	0.972976	0.966382	0.84642	0.853234	0.867078	0.880273	0.828034	0.837011	0.83766	0.818516
Chrna4	Mouse-Chick	0.229056	0.297914	0.320506	0.154686	0.223976	0.428494	0.919684	0.911577	0.901957	0.834415	0.794938	0.823491	0.809107	0.851179	0.798724	0.832468	0.834739
Dph3	Mouse-Chick	0.229056	0.297914	0.320506	0.154686	0.223976	0.667387	0.73765	0.791482	0.6996	0.723881	0.710253	0.699113	0.712524	0.724313	0.715336	0.750595	0.750811
Egln1	Mouse-Chick	0.229056	0.297914	0.320506	0.154686	0.223976	0.428494	0.886607	0.886391	0.889525	0.860588	0.884815	0.875622	0.924941	0.756868	0.845122	0.830629	0.776119
Lclat1	Mouse-Chick	0.229056	0.297914	0.320506	0.154686	0.223976	0.428494	0.893741	0.930818	0.916009	0.825438	0.857452	0.87573	0.888817	0.815488	0.838525	0.865023	0.834199
Leprotl1	Mouse-Chick	0.272295	0.297914	0.320506	0.414442	0.817858	0.428494	0.876554	0.855583	0.842287	0.761627	0.774064	0.783798	0.814514	0.692299	0.78369	0.745836	0.779472
Pcgf6	Mouse-Chick	0.229056	0.297914	0.320506	0.154686	0.446763	0.428494	0.704464	0.808129	0.646525	0.823708	0.701601	0.71393	0.72453	0.855505	0.814082	0.727342	0.808566
Pgm2l1	Mouse-Chick	0.229056	0.297914	0.320506	0.258026	0.340288	0.428494	0.997189	0.995784	0.996325	0.926455	0.912719	0.934783	0.926563	0.936189	0.903418	0.946139	0.930132
Pnrc2	Mouse-Chick	0.229056	0.297914	0.320506	0.179224	0.223976	0.428494	0.830721	0.711815	0.568695	0.897685	0.803483	0.807917	0.853991	0.886762	0.879515	0.770171	0.839066
Rpf2	Mouse-Chick	0.24873	0.322776	0.320506	0.214463	0.223976	0.428494	0.897416	0.911361	0.920333	0.66353	0.725503	0.74562	0.768657	0.639952	0.717067	0.752001	0.609561
Rragd	Mouse-Chick	0.229056	0.297914	0.320506	0.154686	0.223976	0.428494	0.9012	0.917631	0.888661	0.72799	0.744106	0.750703	0.755246	0.678131	0.69403	0.690461	0.730803
Sel1l3	Mouse-Chick	0.229056	0.297914	0.320506	0.154686	0.223976	0.428494	0.804345	0.6996	0.72684	0.664071	0.672291	0.745512	0.74854	0.67878	0.735561	0.753299	0.71101
Sema3a	Mouse-Chick	0.229056	0.297914	0.320506	0.484272	0.506756	0.915685	0.966166	0.958707	0.947033	0.871188	0.835172	0.867618	0.894873	0.687649	0.791802	0.741942	0.741294
Sema3d	Mouse-Chick	0.229056	0.297914	0.320506	0.671171	0.363744	0.633445	0.791374	0.762945	0.731488	0.750487	0.825005	0.688622	0.656284	0.542397	0.467229	0.587065	0.493186
Shtn1	Mouse-Chick	0.229056	0.297914	0.320506	0.154686	0.223976	0.428494	0.883256	0.879797	0.841206	0.84469	0.820896	0.754813	0.843824	0.663422	0.712308	0.714687	0.70928
Slc25a1	Mouse-Chick	0.229056	0.297914	0.320506	0.154686	0.223976	0.428494	0.957626	0.961842	0.971571	0.8435	0.859291	0.747891	0.726368	0.847069	0.782176	0.761843	0.80889
Tcerg1l	Mouse-Chick	0.246568	0.297914	0.320506	0.74673	0.69679	0.927251	0.730624	0.683277	0.782726	0.835821	0.723015	0.685053	0.835713	0.697491	0.795587	0.565758	0.7931
Pip4p2	Mouse-Chick	0.229056	0.297914	0.320506	0.512053	0.582424	0.428494	0.926278	0.936007	0.948222	0.904932	0.897037	0.919533	0.947869	0.817218	0.854207	0.881787	0.861454
Tomm22	Mouse-Chick	0.229056	0.297914	0.320506	0.253378	0.223976	0.428494	0.877419	0.859042	0.850395	0.958901	0.963011	0.962903	0.942894	0.967554	0.959766	0.972529	0.963768
Trp53i11	Mouse-Chick	0.229056	0.297914	0.320506	0.269592	0.860015	0.428494	0.749649	0.74392	0.639607	0.886654	0.851179	0.894225	0.757517	0.937919	0.896496	0.934242	0.925481
Anxa1	Skate-specific	0.92163	0.996649	0.952113	0.687818	0.61842	0.58945	0.142471	0.130148	0.152416	0.0697599	0.0812243	0.0749513	0.0812243	0.0581873	0.0533204	0.0666234	0.0504002
Arsb	Skate-specific	0.842828	0.655281	0.735596	0.369257	0.903038	0.536807	0.152956	0.344936	0.185169	0.175752	0.302077	0.308782	0.29191	0.183431	0.231776	0.203115	0.294722
Btbd17	Skate-specific	0.785537	0.626203	0.706843	0.796887	0.897633	0.695168	0.142471	0.222354	0.170468	0.250162	0.270604	0.286827	0.15942	0.403526	0.332252	0.3183	0.414449
1700021F07Rik	Skate-specific	0.947789	0.987785	0.924981	0.858934	0.758188	0.899038	0.142471	0.130148	0.152416	0.158231	0.129353	0.0970149	0.206035	0.265845	0.178888	0.115942	0.125784
Car9	Skate-specific	0.880445	0.946708	0.611285	0.891687	0.711707	0.693006	0.142471	0.130148	0.152416	0.295912	0.281311	0.257409	0.246701	0.365888	0.406338	0.422345	0.429699
Cald1	Skate-specific	0.916225	0.970922	0.736461	0.977408	0.946708	0.825532	0.337045	0.265701	0.247108	0.253731	0.318516	0.209604	0.338308	0.424832	0.517305	0.402661	0.350638
Cd74	Skate-specific	0.986596	0.948654	0.389147	0.717004	0.86142	0.746514	0.142471	0.130148	0.152416	0.334415	0.227558	0.332252	0.295047	0.353991	0.29602	0.310296	0.25849
Cecr2	Skate-specific	0.927143	0.765431	0.706734	0.710842	0.881094	0.856232	0.184737	0.161388	0.240839	0.303483	0.34231	0.262059	0.234696	0.433377	0.360156	0.350963	0.33939
Cenph	Skate-specific	0.79613	0.82791	0.767376	0.887147	0.55821	0.469463	0.216409	0.154362	0.388499	0.206035	0.195111	0.156716	0.128596	0.153147	0.167316	0.213065	0.195328
Colq	Skate-specific	0.77116	0.739055	0.718625	0.711383	0.880878	0.991568	0.142471	0.130148	0.152416	0.0697599	0.179321	0.159745	0.0812243	0.171209	0.132598	0.100692	0.104369
Csrp1	Skate-specific	0.961518	0.972219	0.54686	0.974922	0.933305	0.657118	0.174143	0.372176	0.209599	0.109669	0.0812243	0.0952844	0.12308	0.108047	0.0687865	0.15239	0.0697599
Efnb1	Skate-specific	0.720787	0.671495	0.784888	0.647065	0.852989	0.923468	0.238028	0.232299	0.189493	0.321004	0.247675	0.318083	0.303266	0.319381	0.348691	0.307052	0.35875
Egr3	Skate-specific	0.959464	0.941196	0.423414	0.803589	0.774943	0.701978	0.170576	0.244406	0.234461	0.092148	0.100368	0.118105	0.157906	0.182782	0.182457	0.0666234	0.225287
Ttc25	Skate-specific	0.783159	0.752567	0.760134	0.909739	0.497244	0.722949	0.15274	0.130148	0.166252	0.234263	0.228099	0.265196	0.217283	0.231451	0.240861	0.221177	0.175644
Gamt	Skate-specific	0.713328	0.850395	0.709437	0.443736	0.601232	0.503621	0.184304	0.160847	0.195979	0.141575	0.142116	0.0800346	0.106965	0.119403	0.0688947	0.119944	0.107939
Rprml	Skate-specific	0.957194	0.983894	0.964869	0.893633	0.223976	0.97784	0.142471	0.130148	0.152416	0.137249	0.15477	0.0749513	0.0812243	0.0581873	0.0533204	0.0666234	0.0504002
Acy1	Skate-specific	0.953627	0.952329	0.616042	0.631499	0.865744	0.952329	0.220084	0.192412	0.194898	0.239022	0.349232	0.250054	0.214904	0.307376	0.32122	0.297318	0.311919
2310022A10Rik	Skate-specific	0.696141	0.79559	0.854827	0.486434	0.416604	0.428494	0.315966	0.345909	0.21749	0.142764	0.204845	0.372053	0.254056	0.175211	0.256003	0.256976	0.313433
Paox	Skate-specific	0.837531	0.872987	0.583613	0.950276	0.543617	0.523619	0.314885	0.33672	0.223651	0.166559	0.208739	0.104586	0.167207	0.196409	0.157582	0.178564	0.150552
Etv5	Skate-specific	0.788023	0.907469	0.478651	0.215544	0.302021	0.428494	0.24419	0.172414	0.231434	0.078196	0.183214	0.131192	0.136275	0.193597	0.161367	0.157365	0.183323
Eya1	Skate-specific	0.884445	0.57637	0.949087	0.155551	0.263971	0.428494	0.144309	0.201492	0.234029	0.261951	0.287476	0.304132	0.34058	0.245295	0.299913	0.2427	0.310188
Fbxl15	Skate-specific	0.801967	0.931143	0.82056	0.722841	0.223976	0.480597	0.260296	0.253378	0.296833	0.214039	0.260653	0.282717	0.234588	0.329223	0.20982	0.225503	0.262816
Gfap	Skate-specific	0.872879	0.983786	0.982813	0.998595	0.998487	0.994271	0.142471	0.130148	0.152416	0.0697599	0.0812243	0.0749513	0.0812243	0.0581873	0.0533204	0.0666234	0.0504002
Ggact	Skate-specific	0.916333	0.676684	0.909956	0.154686	0.681332	0.549995	0.226786	0.153821	0.335207	0.232209	0.158231	0.202574	0.169587	0.151201	0.186567	0.214471	0.213065
Gmppb	Skate-specific	0.94833	0.394228	0.926711	0.867366	0.231975	0.428494	0.227111	0.250892	0.274997	0.262816	0.167424	0.243132	0.148713	0.210145	0.172291	0.189487	0.17997
Gng13	Skate-specific	0.630743	0.658199	0.907037	0.955248	0.517133	0.964112	0.223976	0.212626	0.152416	0.257517	0.254272	0.285096	0.26552	0.329981	0.183647	0.219663	0.339066
H1f10	Skate-specific	0.981624	0.97557	0.986272	0.987028	0.978381	0.990812	0.263647	0.249162	0.229705	0.259247	0.270171	0.268116	0.152498	0.475773	0.259896	0.474259	0.316029
Hgd	Skate-specific	0.581126	0.830937	0.737974	0.900659	0.756999	0.72403	0.142471	0.130148	0.152416	0.131516	0.129786	0.0821977	0.216959	0.126974	0.0911746	0.228748	0.204737
Hmg20b	Skate-specific	0.897308	0.772998	0.824992	0.69506	0.532915	0.803697	0.196844	0.256837	0.170684	0.192624	0.217608	0.335064	0.204413	0.265304	0.19814	0.271901	0.219554
Ism1	Skate-specific	0.877959	0.791266	0.974705	0.949627	0.94887	0.880878	0.163658	0.159983	0.172522	0.17348	0.17586	0.180294	0.0958252	0.337768	0.264763	0.349773	0.164287
Kcns1	Skate-specific	0.971463	0.867366	0.99373	0.820452	0.85407	0.839477	0.142471	0.130148	0.152416	0.164179	0.235561	0.137357	0.221609	0.17467	0.088687	0.145901	0.194787
Kif18a	Skate-specific	0.774403	0.938817	0.563723	0.840233	0.653119	0.907037	0.151659	0.195546	0.169711	0.255029	0.276444	0.336362	0.317975	0.390655	0.461389	0.334739	0.372269
Litaf	Skate-specific	0.564804	0.951897	0.682521	0.1976	0.223976	0.428494	0.298779	0.245811	0.211004	0.0707333	0.0819814	0.131516	0.0938784	0.0581873	0.0752758	0.0666234	0.0529959
Gm765	Skate-specific	0.838828	0.939142	0.736569	0.239325	0.223976	0.428494	0.192195	0.142471	0.152416	0.0697599	0.0812243	0.0749513	0.0812243	0.0581873	0.118862	0.0666234	0.0504002
Nid1	Skate-specific	0.683277	0.692898	0.763053	0.930386	0.920441	0.428494	0.240731	0.3044	0.189169	0.211226	0.231127	0.132598	0.170452	0.338417	0.370971	0.377136	0.267034
Ntn1	Skate-specific	0.9466	0.864231	0.933088	0.863042	0.825857	0.965085	0.162685	0.243001	0.184196	0.219987	0.142873	0.203547	0.0890115	0.342851	0.19987	0.407203	0.284555
Pou3f4	Skate-specific	0.882175	0.970057	0.403848	0.388174	0.507297	0.852232	0.142471	0.221057	0.290239	0.0697599	0.131084	0.154229	0.0812243	0.138763	0.0533204	0.152931	0.0504002
Rab37	Skate-specific	0.843368	0.785212	0.859367	0.254891	0.724787	0.617987	0.171225	0.170684	0.219328	0.0818732	0.0812243	0.0749513	0.108804	0.0581873	0.0533204	0.0666234	0.0504002
Rad54l	Skate-specific	0.665658	0.714409	0.806291	0.318993	0.521241	0.428494	0.220517	0.28278	0.216625	0.303915	0.288125	0.276552	0.308674	0.332684	0.327493	0.298724	0.323383
Rfx5	Skate-specific	0.661766	0.769647	0.680683	0.805751	0.68652	0.428494	0.228083	0.346665	0.26008	0.179862	0.145144	0.132165	0.198032	0.240536	0.284988	0.272875	0.204088
Rgcc	Skate-specific	0.861312	0.982705	0.681332	0.920765	0.968112	0.428494	0.258459	0.130148	0.152416	0.164395	0.356695	0.326195	0.162989	0.452412	0.208198	0.395631	0.357776
Rgs8	Skate-specific	0.493244	0.919468	0.716787	0.451951	0.54513	0.692466	0.243866	0.276078	0.344071	0.306403	0.207657	0.265304	0.22042	0.252217	0.205494	0.271036	0.215228
Ror2	Skate-specific	0.795482	0.687926	0.830829	0.174143	0.508377	0.428494	0.200735	0.130148	0.152416	0.316137	0.173048	0.332576	0.362211	0.34112	0.477504	0.486156	0.357776
Rxrg	Skate-specific	0.796779	0.622203	0.843584	0.43671	0.8705	0.766404	0.142471	0.149605	0.181062	0.0988536	0.120593	0.179537	0.0812243	0.0581873	0.0560242	0.0666234	0.0504002
Scrg1	Skate-specific	0.959572	0.973624	0.921954	0.777321	0.908118	0.428494	0.142471	0.130148	0.152416	0.172831	0.276119	0.185594	0.166234	0.248324	0.186459	0.168722	0.161151
Scrn2	Skate-specific	0.746622	0.951357	0.983569	0.967787	0.913415	0.611069	0.192736	0.130148	0.20841	0.225395	0.263249	0.226368	0.197491	0.266926	0.212741	0.196626	0.252109
Tcea3	Skate-specific	0.873203	0.808669	0.436818	0.364177	0.866177	0.922062	0.142471	0.130148	0.152416	0.0697599	0.0812243	0.0749513	0.109236	0.0581873	0.0841445	0.0666234	0.0504002
Traf2	Skate-specific	0.685764	0.591504	0.874932	0.732786	0.669549	0.967787	0.246568	0.194249	0.177711	0.194138	0.239455	0.333117	0.260221	0.195436	0.220203	0.295047	0.240428
Ubxn11	Skate-specific	0.368717	0.969301	0.888661	0.881634	0.938493	0.614096	0.228516	0.167766	0.152416	0.0697599	0.112481	0.162881	0.0812243	0.0581873	0.130651	0.0748432	0.143305
Usp2	Skate-specific	0.546103	0.894066	0.772133	0.871798	0.933629	0.679494	0.155875	0.206572	0.227435	0.14536	0.126866	0.120268	0.0812243	0.0802509	0.0712741	0.133788	0.132706
Wdr54	Skate-specific	0.694736	0.818182	0.755054	0.834072	0.96422	0.492487	0.211112	0.18798	0.198789	0.0697599	0.100584	0.0749513	0.0812243	0.0964742	0.0533204	0.0930132	0.0714904
Zfp36l2	Skate-specific	0.482759	0.83137	0.857961	0.867041	0.870068	0.67744	0.200843	0.185385	0.262566	0.200519	0.226584	0.219987	0.158014	0.313325	0.297318	0.261627	0.282933
Zp1	Skate-specific	0.854502	0.960221	0.922819	0.974273	0.987461	0.823911	0.194033	0.130148	0.152416	0.122756	0.204413	0.0860913	0.148821	0.181376	0.147307	0.128488	0.16353
4833420G17Rik	Mouse-specific	0.250027	0.297914	0.320506	0.154686	0.223976	0.440925	0.707599	0.744028	0.753	0.256435	0.188406	0.203764	0.269738	0.174346	0.224421	0.245187	0.242375
Cers2	Mouse-specific	0.253918	0.297914	0.320506	0.322019	0.696898	0.465896	0.769322	0.807588	0.859907	0.279256	0.265737	0.237941	0.241942	0.322734	0.25265	0.303591	0.336578
Cib2	Mouse-specific	0.229056	0.297914	0.320506	0.154686	0.346341	0.428494	0.865096	0.827802	0.758296	0.278174	0.280446	0.270495	0.300238	0.232749	0.230045	0.298832	0.260545
Clmp	Mouse-specific	0.229056	0.297914	0.320506	0.154686	0.275322	0.428494	0.933953	0.963788	0.934602	0.251352	0.260221	0.200519	0.184512	0.263357	0.383625	0.268332	0.211551
Coch	Mouse-specific	0.229056	0.297914	0.320506	0.154686	0.223976	0.428494	0.798184	0.828019	0.861637	0.0697599	0.0906338	0.0749513	0.175968	0.0916072	0.136924	0.0666234	0.102747
Cthrc1	Mouse-specific	0.229056	0.297914	0.320506	0.154686	0.417144	0.428494	0.779591	0.674197	0.761431	0.234047	0.243565	0.28488	0.254488	0.221826	0.244754	0.227774	0.239671
Ctxn1	Mouse-specific	0.229056	0.297914	0.320506	0.357259	0.520376	0.428494	0.963247	0.960761	0.959896	0.0697599	0.0812243	0.0749513	0.0812243	0.189487	0.0533204	0.0666234	0.180402
Deaf1	Mouse-specific	0.229056	0.297914	0.320506	0.510539	0.223976	0.428494	0.707491	0.739271	0.736245	0.30478	0.314406	0.255354	0.302509	0.292992	0.232857	0.231235	0.263141
Etv4	Mouse-specific	0.260404	0.297914	0.320506	0.154686	0.223976	0.428494	0.859475	0.863258	0.84953	0.27255	0.383517	0.340039	0.168938	0.183106	0.163855	0.205819	0.133896
Kcnv1	Mouse-specific	0.229056	0.297914	0.320506	0.154686	0.223976	0.428494	0.710085	0.766728	0.708788	0.18992	0.14655	0.192191	0.154229	0.119079	0.0988536	0.0666234	0.105235
Kctd12	Mouse-specific	0.229056	0.297914	0.320506	0.154686	0.223976	0.862069	0.91201	0.957518	0.969193	0.119836	0.0812243	0.0749513	0.0812243	0.102639	0.133571	0.122648	0.11843
Klhl23	Mouse-specific	0.229056	0.297914	0.320506	0.379202	0.298562	0.548914	0.925305	0.914063	0.908118	0.22215	0.179645	0.318949	0.287908	0.213065	0.274173	0.3687	0.331603
Lrrc3b	Mouse-specific	0.229056	0.297914	0.320506	0.15728	0.223976	0.428494	0.691601	0.765106	0.776349	0.281743	0.303158	0.244106	0.337876	0.160177	0.253299	0.179213	0.268549
Mal2	Mouse-specific	0.229056	0.297914	0.320506	0.154686	0.223976	0.428494	0.719706	0.729867	0.695817	0.143089	0.0891196	0.212416	0.22096	0.0651092	0.141791	0.0917153	0.122431
Mecp2	Mouse-specific	0.229056	0.297914	0.320506	0.154686	0.733975	0.757864	0.760566	0.720463	0.759053	0.106208	0.0812243	0.0749513	0.147307	0.0917153	0.0533204	0.0666234	0.0504002
Med11	Mouse-specific	0.229056	0.297914	0.320506	0.154686	0.223976	0.428494	0.614312	0.826073	0.660145	0.264655	0.260653	0.32533	0.269522	0.392494	0.139195	0.355505	0.204305
Minar2	Mouse-specific	0.229056	0.297914	0.320506	0.154686	0.223976	0.428494	0.895579	0.855259	0.861745	0.0697599	0.0812243	0.0749513	0.0812243	0.0581873	0.0533204	0.0666234	0.0504002
Nab1	Mouse-specific	0.239758	0.297914	0.320506	0.154686	0.538428	0.428494	0.721111	0.816344	0.706518	0.26552	0.16472	0.21339	0.225936	0.247026	0.240753	0.0791694	0.211984
Nipsnap1	Mouse-specific	0.229056	0.297914	0.320506	0.154686	0.223976	0.428494	0.872771	0.816668	0.843909	0.352044	0.213065	0.299697	0.165585	0.341986	0.169371	0.186243	0.207874
Plpp2	Mouse-specific	0.229056	0.297914	0.320506	0.367636	0.345044	0.428494	0.747487	0.773214	0.805102	0.0697599	0.0812243	0.0749513	0.0812243	0.0581873	0.167856	0.11605	0.0504002
Ppp1r1c	Mouse-specific	0.246244	0.297914	0.320506	0.395957	0.416387	0.428494	0.871257	0.859907	0.869311	0.0987454	0.190353	0.0749513	0.0812243	0.137249	0.0533204	0.0666234	0.0504002
Rab31	Mouse-specific	0.229056	0.297914	0.320506	0.185277	0.223976	0.428494	0.729543	0.701005	0.778727	0.292667	0.236318	0.276011	0.281203	0.316137	0.348475	0.336037	0.237508
Rbp1	Mouse-specific	0.229056	0.297914	0.320506	0.154686	0.223976	0.428494	0.992541	0.99146	0.992001	0.0697599	0.0812243	0.151958	0.151958	0.0932295	0.11843	0.0666234	0.118646
Rfx6	Mouse-specific	0.229056	0.297914	0.320506	0.154686	0.223976	0.428494	0.944979	0.915793	0.911253	0.0765737	0.0873891	0.123188	0.116375	0.081008	0.166667	0.0666234	0.0882544
Rprm	Mouse-specific	0.229056	0.297914	0.320506	0.154686	0.223976	0.428494	0.855475	0.845422	0.91309	0.133247	0.132273	0.200087	0.0812243	0.113563	0.0533204	0.0666234	0.114212
Sfr1	Mouse-specific	0.257269	0.297914	0.320506	0.23792	0.715598	0.428494	0.873851	0.906713	0.871149	0.175211	0.170344	0.205819	0.201817	0.228964	0.22626	0.19111	0.23329
Slc18a2	Mouse-specific	0.229056	0.297914	0.320506	0.656145	0.223976	0.428494	0.667712	0.746838	0.74165	0.188081	0.240536	0.120917	0.200844	0.152498	0.192191	0.144495	0.178239
Socs2	Mouse-specific	0.229056	0.297914	0.337153	0.154686	0.223976	0.45033	0.730083	0.781645	0.872554	0.210578	0.144928	0.204629	0.139412	0.174886	0.150876	0.149037	0.187649
Sra1	Mouse-specific	0.229056	0.297914	0.320506	0.450654	0.223976	0.428494	0.704032	0.657551	0.792779	0.280013	0.288233	0.281852	0.205711	0.340363	0.234155	0.220095	0.268008
Thra	Mouse-specific	0.233596	0.297914	0.320506	0.157713	0.223976	0.437034	0.895903	0.90174	0.862069	0.154445	0.182674	0.165261	0.127623	0.148821	0.121566	0.144603	0.130218
Trim62	Mouse-specific	0.229056	0.297914	0.320506	0.154686	0.223976	0.428494	0.778835	0.783159	0.827478	0.303374	0.26844	0.249946	0.197058	0.300779	0.200411	0.234588	0.27255
Zfp512b	Mouse-specific	0.229056	0.297914	0.320506	0.497352	0.290779	0.428494	0.773322	0.801751	0.822181	0.187973	0.214363	0.160826	0.183971	0.209172	0.215661	0.189596	0.22334
Cdca7l	Chick-specific	0.229056	0.297914	0.320506	0.338774	0.471517	0.573992	0.255756	0.220949	0.211437	0.766385	0.726044	0.737508	0.633463	0.858425	0.856046	0.65239	0.84231
Ctso	Chick-specific	0.229056	0.297914	0.320506	0.154686	0.223976	0.428494	0.252946	0.257594	0.177386	0.675752	0.732209	0.69403	0.703656	0.608587	0.62957	0.655202	0.677915
Cxcr4	Chick-specific	0.229056	0.297914	0.320506	0.741109	0.223976	0.428494	0.142471	0.130148	0.152416	0.734588	0.719338	0.678564	0.690461	0.875946	0.808133	0.883517	0.853234
Prg4	Chick-specific	0.229056	0.297914	0.320506	0.154686	0.642849	0.428494	0.178575	0.238245	0.196411	0.810945	0.72745	0.817651	0.795263	0.477071	0.734588	0.627731	0.647091
Lrtm1	Chick-specific	0.229056	0.297914	0.320506	0.154686	0.835802	0.428494	0.227002	0.197816	0.293806	0.628921	0.731235	0.723881	0.811162	0.345987	0.601557	0.536989	0.70279
Msh4	Chick-specific	0.229056	0.297914	0.320506	0.335099	0.223976	0.428494	0.142471	0.134256	0.193601	0.855072	0.858317	0.888384	0.904391	0.793316	0.876379	0.814623	0.786827
Stat1	Chick-specific	0.229056	0.29867	0.362988	0.277159	0.288077	0.439196	0.261485	0.300832	0.254459	0.714796	0.715661	0.779148	0.772118	0.763465	0.764439	0.752758	0.796236
