# Supplementary material for: Little skate genome provides insights into genetic programs essential for limb-based locomotion
Source: eLife. 2022 Oct 26;11:e78345. doi: 10.7554/eLife.78345 (PMC9605692; doi:10.7554/eLife.78345)
Supplement: Supplementary file 5. — The ortholog group information predicted by eggNOG. [file elife-78345-supp5.xlsx]

## Sheet: Skate
query	Gene	seed_ortholog	evalue	score	eggNOG_OGs	max_annot_lvl	COG_category	Description	Preferred_name	GOs	EC	KEGG_ko	KEGG_Pathway	KEGG_Module	KEGG_Reaction	KEGG_rclass	BRITE	KEGG_TC	CAZy	BiGG_Reaction	PFAMs
LEUER_T0000003	mgst2	9940.ENSOARP00000013911	7.71e-32	115.0	2AWJE@1|root,2S082@2759|Eukaryota,3A275@33154|Opisthokonta,3BQVC@33208|Metazoa,3D6MJ@33213|Bilateria,48E85@7711|Chordata,49B6G@7742|Vertebrata,3JGDC@40674|Mammalia,4JBN6@91561|Cetartiodactyla	33208|Metazoa	T	microsomal glutathione S-transferase 2	MGST2	GO:0003674,GO:0003824,GO:0004364,GO:0004464,GO:0004601,GO:0004602,GO:0005575,GO:0005622,GO:0005623,GO:0005634,GO:0005635,GO:0005737,GO:0005783,GO:0005789,GO:0005886,GO:0006082,GO:0006518,GO:0006575,GO:0006629,GO:0006643,GO:0006690,GO:0006691,GO:0006749,GO:0006750,GO:0006790,GO:0006805,GO:0006807,GO:0008150,GO:0008152,GO:0009056,GO:0009058,GO:0009410,GO:0009636,GO:0009987,GO:0012505,GO:0016020,GO:…	2.5.1.18	ko:K00799	ko00480,ko00980,ko00982,ko00983,ko01524,ko05200,ko05204,ko05225,ko05418,map00480,map00980,map00982,map00983,map01524,map05200,map05204,map05225,map05418	-	R03522,R07002,R07003,R07004,R07023,R07024,R07025,R07026,R07069,R07070,R07083,R07084,R07091,R07092,R07093,R07094,R07100,R07113,R07116,R08280,R09409,R11905	RC00004,RC00069,RC00840,RC00948,RC01704,RC01705,RC01706,RC01758,RC01759,RC01765,RC01767,RC01769,RC02243,RC02527,RC02939,RC02940,RC02942,RC02943,RC02944	ko00000,ko00001,ko01000,ko02000	1.A.12.2.2,1.A.12.3.2	-	-	MAPEG
LEUER_T0000004	mgst2	9940.ENSOARP00000013911	1.32e-54	175.0	2AWJE@1|root,2S082@2759|Eukaryota,3A275@33154|Opisthokonta,3BQVC@33208|Metazoa,3D6MJ@33213|Bilateria,48E85@7711|Chordata,49B6G@7742|Vertebrata,3JGDC@40674|Mammalia,4JBN6@91561|Cetartiodactyla	33208|Metazoa	T	microsomal glutathione S-transferase 2	MGST2	GO:0003674,GO:0003824,GO:0004364,GO:0004464,GO:0004601,GO:0004602,GO:0005575,GO:0005622,GO:0005623,GO:0005634,GO:0005635,GO:0005737,GO:0005783,GO:0005789,GO:0005886,GO:0006082,GO:0006518,GO:0006575,GO:0006629,GO:0006643,GO:0006690,GO:0006691,GO:0006749,GO:0006750,GO:0006790,GO:0006805,GO:0006807,GO:0008150,GO:0008152,GO:0009056,GO:0009058,GO:0009410,GO:0009636,GO:0009987,GO:0012505,GO:0016020,GO:…	2.5.1.18	ko:K00799	ko00480,ko00980,ko00982,ko00983,ko01524,ko05200,ko05204,ko05225,ko05418,map00480,map00980,map00982,map00983,map01524,map05200,map05204,map05225,map05418	-	R03522,R07002,R07003,R07004,R07023,R07024,R07025,R07026,R07069,R07070,R07083,R07084,R07091,R07092,R07093,R07094,R07100,R07113,R07116,R08280,R09409,R11905	RC00004,RC00069,RC00840,RC00948,RC01704,RC01705,RC01706,RC01758,RC01759,RC01765,RC01767,RC01769,RC02243,RC02527,RC02939,RC02940,RC02942,RC02943,RC02944	ko00000,ko00001,ko01000,ko02000	1.A.12.2.2,1.A.12.3.2	-	-	MAPEG
LEUER_T0000005	maml3	8469.XP_007062889.1	1.02e-287	840.0	28PSD@1|root,2QWEV@2759|Eukaryota,38GHG@33154|Opisthokonta,3BH07@33208|Metazoa,3D3KI@33213|Bilateria,483QQ@7711|Chordata,48VWW@7742|Vertebrata,4CFUC@8459|Testudines	33208|Metazoa	S	cardiac septum cell differentiation	MAML3	GO:0003674,GO:0003712,GO:0003713,GO:0005575,GO:0005622,GO:0005623,GO:0005634,GO:0005654,GO:0006139,GO:0006351,GO:0006352,GO:0006355,GO:0006357,GO:0006366,GO:0006367,GO:0006725,GO:0006807,GO:0007154,GO:0007165,GO:0007166,GO:0007219,GO:0007221,GO:0008150,GO:0008152,GO:0008593,GO:0009058,GO:0009059,GO:0009889,GO:0009891,GO:0009893,GO:0009966,GO:0009967,GO:0009987,GO:0010467,GO:0010468,GO:0010556,GO:…	-	ko:K06061	ko04330,ko04658,ko05165,map04330,map04658,map05165	-	-	-	ko00000,ko00001	-	-	-	MamL-1
LEUER_T0000006	maml3	13616.ENSMODP00000000150	3.32e-261	764.0	28PSD@1|root,2QWEV@2759|Eukaryota,38GHG@33154|Opisthokonta,3BH07@33208|Metazoa,3D3KI@33213|Bilateria,483QQ@7711|Chordata,48VWW@7742|Vertebrata,3JAZK@40674|Mammalia,4K4MM@9263|Metatheria	33208|Metazoa	S	Mastermind-like 3 (Drosophila)	MAML3	GO:0003674,GO:0003712,GO:0003713,GO:0005575,GO:0005622,GO:0005623,GO:0005634,GO:0005654,GO:0006139,GO:0006351,GO:0006352,GO:0006355,GO:0006357,GO:0006366,GO:0006367,GO:0006725,GO:0006807,GO:0007154,GO:0007165,GO:0007166,GO:0007219,GO:0007221,GO:0008150,GO:0008152,GO:0008593,GO:0009058,GO:0009059,GO:0009889,GO:0009891,GO:0009893,GO:0009966,GO:0009967,GO:0009987,GO:0010467,GO:0010468,GO:0010556,GO:…	-	ko:K06061	ko04330,ko04658,ko05165,map04330,map04658,map05165	-	-	-	ko00000,ko00001	-	-	-	MamL-1
LEUER_T0000007	scoc	106582.XP_004538873.1	1.13e-47	155.0	KOG3650@1|root,KOG3650@2759|Eukaryota,3A3F8@33154|Opisthokonta,3BQEQ@33208|Metazoa,3D7RS@33213|Bilateria,48FD9@7711|Chordata,49C3W@7742|Vertebrata,4A43G@7898|Actinopterygii	33208|Metazoa	S	Short coiled-coil protein	SCOC	GO:0001558,GO:0003008,GO:0003674,GO:0005488,GO:0005515,GO:0005575,GO:0005622,GO:0005623,GO:0005634,GO:0005654,GO:0005737,GO:0005794,GO:0007275,GO:0007399,GO:0007600,GO:0008150,GO:0008361,GO:0009893,GO:0009894,GO:0009896,GO:0009987,GO:0010506,GO:0010508,GO:0010769,GO:0010975,GO:0012505,GO:0016043,GO:0016239,GO:0016241,GO:0019222,GO:0019233,GO:0022008,GO:0022603,GO:0022604,GO:0030154,GO:0030424,GO:…	-	ko:K20316	-	-	-	-	ko00000,ko04131	-	-	-	DUF2205
LEUER_T0000009	scoc	9371.XP_004712210.1	2.87e-42	142.0	KOG3650@1|root,KOG3650@2759|Eukaryota,3A3F8@33154|Opisthokonta,3BQEQ@33208|Metazoa,3D7RS@33213|Bilateria,48FD9@7711|Chordata,49C3W@7742|Vertebrata,3JGS0@40674|Mammalia,357DB@311790|Afrotheria	33208|Metazoa	S	Short coiled-coil protein	SCOC	GO:0001558,GO:0003008,GO:0003674,GO:0005488,GO:0005515,GO:0005575,GO:0005622,GO:0005623,GO:0005634,GO:0005654,GO:0005737,GO:0005794,GO:0007275,GO:0007399,GO:0007600,GO:0008150,GO:0008361,GO:0009893,GO:0009894,GO:0009896,GO:0009987,GO:0010506,GO:0010508,GO:0010769,GO:0010975,GO:0012505,GO:0016043,GO:0016239,GO:0016241,GO:0019222,GO:0019233,GO:0022008,GO:0022603,GO:0022604,GO:0030154,GO:0030424,GO:…	-	ko:K20316	-	-	-	-	ko00000,ko04131	-	-	-	DUF2205
LEUER_T0000010	scoc	9371.XP_004712210.1	2.87e-42	142.0	KOG3650@1|root,KOG3650@2759|Eukaryota,3A3F8@33154|Opisthokonta,3BQEQ@33208|Metazoa,3D7RS@33213|Bilateria,48FD9@7711|Chordata,49C3W@7742|Vertebrata,3JGS0@40674|Mammalia,357DB@311790|Afrotheria	33208|Metazoa	S	Short coiled-coil protein	SCOC	GO:0001558,GO:0003008,GO:0003674,GO:0005488,GO:0005515,GO:0005575,GO:0005622,GO:0005623,GO:0005634,GO:0005654,GO:0005737,GO:0005794,GO:0007275,GO:0007399,GO:0007600,GO:0008150,GO:0008361,GO:0009893,GO:0009894,GO:0009896,GO:0009987,GO:0010506,GO:0010508,GO:0010769,GO:0010975,GO:0012505,GO:0016043,GO:0016239,GO:0016241,GO:0019222,GO:0019233,GO:0022008,GO:0022603,GO:0022604,GO:0030154,GO:0030424,GO:…	-	ko:K20316	-	-	-	-	ko00000,ko04131	-	-	-	DUF2205
LEUER_T0000011	scoc	9371.XP_004712210.1	1.08e-41	142.0	KOG3650@1|root,KOG3650@2759|Eukaryota,3A3F8@33154|Opisthokonta,3BQEQ@33208|Metazoa,3D7RS@33213|Bilateria,48FD9@7711|Chordata,49C3W@7742|Vertebrata,3JGS0@40674|Mammalia,357DB@311790|Afrotheria	33208|Metazoa	S	Short coiled-coil protein	SCOC	GO:0001558,GO:0003008,GO:0003674,GO:0005488,GO:0005515,GO:0005575,GO:0005622,GO:0005623,GO:0005634,GO:0005654,GO:0005737,GO:0005794,GO:0007275,GO:0007399,GO:0007600,GO:0008150,GO:0008361,GO:0009893,GO:0009894,GO:0009896,GO:0009987,GO:0010506,GO:0010508,GO:0010769,GO:0010975,GO:0012505,GO:0016043,GO:0016239,GO:0016241,GO:0019222,GO:0019233,GO:0022008,GO:0022603,GO:0022604,GO:0030154,GO:0030424,GO:…	-	ko:K20316	-	-	-	-	ko00000,ko04131	-	-	-	DUF2205
LEUER_T0000013	clgn	7897.ENSLACP00000002710	7.57e-192	560.0	KOG0675@1|root,KOG0675@2759|Eukaryota,38HTR@33154|Opisthokonta,3BAHV@33208|Metazoa,3CSIV@33213|Bilateria,480KK@7711|Chordata,491KM@7742|Vertebrata	33208|Metazoa	O	protein binding involved in protein folding	CLGN	GO:0000003,GO:0001894,GO:0001895,GO:0003674,GO:0005488,GO:0005509,GO:0005515,GO:0005575,GO:0005622,GO:0005623,GO:0005634,GO:0005635,GO:0005737,GO:0005783,GO:0005789,GO:0005886,GO:0006457,GO:0006726,GO:0006807,GO:0006950,GO:0006986,GO:0007154,GO:0007165,GO:0007338,GO:0007339,GO:0008037,GO:0008150,GO:0008152,GO:0009058,GO:0009059,GO:0009266,GO:0009408,GO:0009566,GO:0009628,GO:0009987,GO:0009988,GO:…	-	ko:K08054,ko:K09551	ko04141,ko04145,ko04612,ko04918,ko05166,map04141,map04145,map04612,map04918,map05166	-	-	-	ko00000,ko00001,ko03110,ko04091,ko04131	-	-	-	Calreticulin
LEUER_T0000012	clgn	7897.ENSLACP00000002710	7.57e-192	560.0	KOG0675@1|root,KOG0675@2759|Eukaryota,38HTR@33154|Opisthokonta,3BAHV@33208|Metazoa,3CSIV@33213|Bilateria,480KK@7711|Chordata,491KM@7742|Vertebrata	33208|Metazoa	O	protein binding involved in protein folding	CLGN	GO:0000003,GO:0001894,GO:0001895,GO:0003674,GO:0005488,GO:0005509,GO:0005515,GO:0005575,GO:0005622,GO:0005623,GO:0005634,GO:0005635,GO:0005737,GO:0005783,GO:0005789,GO:0005886,GO:0006457,GO:0006726,GO:0006807,GO:0006950,GO:0006986,GO:0007154,GO:0007165,GO:0007338,GO:0007339,GO:0008037,GO:0008150,GO:0008152,GO:0009058,GO:0009059,GO:0009266,GO:0009408,GO:0009566,GO:0009628,GO:0009987,GO:0009988,GO:…	-	ko:K08054,ko:K09551	ko04141,ko04145,ko04612,ko04918,ko05166,map04141,map04145,map04612,map04918,map05166	-	-	-	ko00000,ko00001,ko03110,ko04091,ko04131	-	-	-	Calreticulin
LEUER_T0000014	mgat4d	7955.ENSDARP00000000748	2.7e-243	686.0	28HC5@1|root,2QPQJ@2759|Eukaryota,38B8P@33154|Opisthokonta,3B9C9@33208|Metazoa,3CRMG@33213|Bilateria,488XN@7711|Chordata,48ZC0@7742|Vertebrata,49ZAY@7898|Actinopterygii	33208|Metazoa	S	Mannosyl (alpha-1,3-)-glycoprotein beta-1,4-N-acetylglucosaminyltransferase, isozyme B	MGAT4B	GO:0000139,GO:0003674,GO:0003824,GO:0005575,GO:0005622,GO:0005623,GO:0005737,GO:0005794,GO:0006464,GO:0006486,GO:0006487,GO:0006491,GO:0006807,GO:0008150,GO:0008152,GO:0008194,GO:0008375,GO:0008454,GO:0009058,GO:0009059,GO:0009100,GO:0009101,GO:0009987,GO:0012505,GO:0016020,GO:0016740,GO:0016757,GO:0016758,GO:0019538,GO:0031090,GO:0031984,GO:0034645,GO:0036211,GO:0043170,GO:0043226,GO:0043227,GO:…	2.4.1.145	ko:K00738	ko00510,ko00513,ko01100,map00510,map00513,map01100	M00075	R05987	-	ko00000,ko00001,ko00002,ko01000,ko01003	-	GT54	-	Glyco_transf_54
LEUER_T0000015	elmod2	8469.XP_007062885.1	1.15e-106	315.0	KOG2998@1|root,KOG2998@2759|Eukaryota,39S85@33154|Opisthokonta,3BHVJ@33208|Metazoa,3D0CJ@33213|Bilateria,484A2@7711|Chordata,494RU@7742|Vertebrata,4CFTB@8459|Testudines	33208|Metazoa	S	ELMO/CED-12 family	ELMOD2	GO:0000278,GO:0000281,GO:0000910,GO:0002682,GO:0002697,GO:0002831,GO:0003674,GO:0005096,GO:0005575,GO:0007049,GO:0008047,GO:0008150,GO:0009987,GO:0022402,GO:0022603,GO:0030234,GO:0030695,GO:0031347,GO:0032101,GO:0032991,GO:0043085,GO:0043087,GO:0043547,GO:0043900,GO:0044093,GO:0048583,GO:0050688,GO:0050789,GO:0050790,GO:0050793,GO:0051239,GO:0051301,GO:0051336,GO:0051345,GO:0060589,GO:0061640,GO:…	-	-	-	-	-	-	-	-	-	-	ELMO_CED12
LEUER_T0000016	ucp1	7897.ENSLACP00000007314	1.64e-150	429.0	KOG0759@1|root,KOG0753@2759|Eukaryota,39BBG@33154|Opisthokonta,3B9D8@33208|Metazoa,3CX4V@33213|Bilateria,47ZCV@7711|Chordata,48YCE@7742|Vertebrata	33208|Metazoa	C	Belongs to the mitochondrial carrier (TC 2.A.29) family	UCP3	GO:0000302,GO:0000303,GO:0000305,GO:0001666,GO:0003674,GO:0005215,GO:0005575,GO:0005622,GO:0005623,GO:0005737,GO:0005739,GO:0005740,GO:0005743,GO:0006082,GO:0006629,GO:0006631,GO:0006810,GO:0006811,GO:0006812,GO:0006839,GO:0006950,GO:0006979,GO:0007568,GO:0007584,GO:0007585,GO:0008150,GO:0008152,GO:0008324,GO:0009266,GO:0009409,GO:0009605,GO:0009628,GO:0009719,GO:0009725,GO:0009987,GO:0009991,GO:…	-	ko:K15103	-	-	-	-	ko00000,ko02000	2.A.29.3.3,2.A.29.3.4,2.A.29.3.5	-	-	Mito_carr
LEUER_T0000017	tbc1d9	13735.ENSPSIP00000020182	0.0	2006.0	COG5210@1|root,KOG4347@2759|Eukaryota,38BD9@33154|Opisthokonta,3BA0W@33208|Metazoa,3CTC9@33213|Bilateria,486TW@7711|Chordata,493BN@7742|Vertebrata,4C93B@8459|Testudines	33208|Metazoa	S	TBC1 domain family, member 9	TBC1D9	GO:0003674,GO:0005096,GO:0005488,GO:0005515,GO:0005575,GO:0005622,GO:0005623,GO:0006810,GO:0006886,GO:0008047,GO:0008104,GO:0008150,GO:0012505,GO:0015031,GO:0015833,GO:0017016,GO:0017137,GO:0019899,GO:0030234,GO:0030695,GO:0031267,GO:0031338,GO:0032879,GO:0033036,GO:0033043,GO:0034613,GO:0042886,GO:0043085,GO:0043087,GO:0043547,GO:0044093,GO:0044464,GO:0045184,GO:0046907,GO:0050789,GO:0050790,GO:…	-	ko:K19951	-	-	-	-	ko00000,ko04131	-	-	-	GRAM,RabGAP-TBC
LEUER_T0000018	rnf150	7918.ENSLOCP00000011072	2.08e-243	676.0	KOG0800@1|root,KOG0800@2759|Eukaryota,390PJ@33154|Opisthokonta,3BHU7@33208|Metazoa,3CS08@33213|Bilateria,47YVT@7711|Chordata,4967M@7742|Vertebrata,49Q4V@7898|Actinopterygii	33208|Metazoa	O	Ring finger protein	RNF150	-	-	-	-	-	-	-	-	-	-	-	PA,zf-RING_2
LEUER_T0000019	rnf150	7918.ENSLOCP00000011072	6.95e-194	547.0	KOG0800@1|root,KOG0800@2759|Eukaryota,390PJ@33154|Opisthokonta,3BHU7@33208|Metazoa,3CS08@33213|Bilateria,47YVT@7711|Chordata,4967M@7742|Vertebrata,49Q4V@7898|Actinopterygii	33208|Metazoa	O	Ring finger protein	RNF150	-	-	-	-	-	-	-	-	-	-	-	PA,zf-RING_2
LEUER_T0000020	znf330	28737.XP_006887079.1	1.68e-185	521.0	2C2D9@1|root,2QRJT@2759|Eukaryota,38BMP@33154|Opisthokonta,3BA1W@33208|Metazoa,3CYVG@33213|Bilateria,480KN@7711|Chordata,490YW@7742|Vertebrata,3J9NU@40674|Mammalia,34X5F@311790|Afrotheria	33208|Metazoa	S	Zinc finger protein 330	ZNF330	GO:0000775,GO:0002164,GO:0002376,GO:0002520,GO:0003674,GO:0005488,GO:0005575,GO:0005622,GO:0005623,GO:0005634,GO:0005694,GO:0005730,GO:0007275,GO:0008150,GO:0009791,GO:0030097,GO:0030496,GO:0031974,GO:0031981,GO:0032501,GO:0032502,GO:0035166,GO:0035167,GO:0043167,GO:0043169,GO:0043226,GO:0043227,GO:0043228,GO:0043229,GO:0043231,GO:0043232,GO:0043233,GO:0044422,GO:0044424,GO:0044427,GO:0044428,GO:…	-	-	-	-	-	-	-	-	-	-	NOA36
LEUER_T0000021	il15	9940.ENSOARP00000012994	4.83e-11	62.8	2E5VA@1|root,2SCMF@2759|Eukaryota,3A60Y@33154|Opisthokonta,3BT13@33208|Metazoa,3D2HM@33213|Bilateria,48D8Y@7711|Chordata,495Q9@7742|Vertebrata,3J7VX@40674|Mammalia,4IYXY@91561|Cetartiodactyla	33208|Metazoa	T	Cytokine that stimulates the proliferation of T- lymphocytes. Stimulation by IL-15 requires interaction of IL-15 with components of IL-2R, including IL-2R beta and probably IL-2R gamma but not IL-2R alpha (By similarity)	IL15	GO:0001525,GO:0001568,GO:0001775,GO:0001779,GO:0001817,GO:0001819,GO:0001866,GO:0001932,GO:0001934,GO:0001944,GO:0002376,GO:0002520,GO:0002521,GO:0002682,GO:0002684,GO:0002694,GO:0002696,GO:0002697,GO:0002831,GO:0003008,GO:0003012,GO:0003674,GO:0005102,GO:0005125,GO:0005488,GO:0005515,GO:0005575,GO:0005576,GO:0005615,GO:0005622,GO:0005623,GO:0005634,GO:0005654,GO:0005737,GO:0005768,GO:0005794,GO:…	-	ko:K05433	ko04060,ko04630,ko04668,ko04672,ko05166,ko05168,ko05200,ko05323,map04060,map04630,map04668,map04672,map05166,map05168,map05200,map05323	-	-	-	ko00000,ko00001,ko04052	-	-	-	IL15
LEUER_T0000022	inpp4b	28377.ENSACAP00000002724	0.0	1170.0	KOG4428@1|root,KOG4428@2759|Eukaryota,38H7J@33154|Opisthokonta,3BAN9@33208|Metazoa,3CTVW@33213|Bilateria,47Z0H@7711|Chordata,49032@7742|Vertebrata	33208|Metazoa	T	type II inositol 3,4-bisphosphate	INPP4B	GO:0002682,GO:0002683,GO:0002761,GO:0002762,GO:0003674,GO:0003824,GO:0005488,GO:0005575,GO:0005622,GO:0005623,GO:0005737,GO:0005794,GO:0005829,GO:0005975,GO:0006066,GO:0006629,GO:0006644,GO:0006650,GO:0006661,GO:0006793,GO:0006796,GO:0006873,GO:0006874,GO:0006875,GO:0007154,GO:0007165,GO:0008150,GO:0008152,GO:0008289,GO:0008610,GO:0008654,GO:0009056,GO:0009058,GO:0009966,GO:0009987,GO:0010646,GO:…	3.1.3.66	ko:K01109	ko00562,ko01100,ko04070,map00562,map01100,map04070	M00131	R04372,R07299	RC00078	ko00000,ko00001,ko00002,ko01000	-	-	-	-
LEUER_T0000023	inpp4b	28377.ENSACAP00000002724	0.0	1086.0	KOG4428@1|root,KOG4428@2759|Eukaryota,38H7J@33154|Opisthokonta,3BAN9@33208|Metazoa,3CTVW@33213|Bilateria,47Z0H@7711|Chordata,49032@7742|Vertebrata	33208|Metazoa	T	type II inositol 3,4-bisphosphate	INPP4B	GO:0002682,GO:0002683,GO:0002761,GO:0002762,GO:0003674,GO:0003824,GO:0005488,GO:0005575,GO:0005622,GO:0005623,GO:0005737,GO:0005794,GO:0005829,GO:0005975,GO:0006066,GO:0006629,GO:0006644,GO:0006650,GO:0006661,GO:0006793,GO:0006796,GO:0006873,GO:0006874,GO:0006875,GO:0007154,GO:0007165,GO:0008150,GO:0008152,GO:0008289,GO:0008610,GO:0008654,GO:0009056,GO:0009058,GO:0009966,GO:0009987,GO:0010646,GO:…	3.1.3.66	ko:K01109	ko00562,ko01100,ko04070,map00562,map01100,map04070	M00131	R04372,R07299	RC00078	ko00000,ko00001,ko00002,ko01000	-	-	-	-
LEUER_T0000024	inpp4b	28377.ENSACAP00000002724	0.0	1000.0	KOG4428@1|root,KOG4428@2759|Eukaryota,38H7J@33154|Opisthokonta,3BAN9@33208|Metazoa,3CTVW@33213|Bilateria,47Z0H@7711|Chordata,49032@7742|Vertebrata	33208|Metazoa	T	type II inositol 3,4-bisphosphate	INPP4B	GO:0002682,GO:0002683,GO:0002761,GO:0002762,GO:0003674,GO:0003824,GO:0005488,GO:0005575,GO:0005622,GO:0005623,GO:0005737,GO:0005794,GO:0005829,GO:0005975,GO:0006066,GO:0006629,GO:0006644,GO:0006650,GO:0006661,GO:0006793,GO:0006796,GO:0006873,GO:0006874,GO:0006875,GO:0007154,GO:0007165,GO:0008150,GO:0008152,GO:0008289,GO:0008610,GO:0008654,GO:0009056,GO:0009058,GO:0009966,GO:0009987,GO:0010646,GO:…	3.1.3.66	ko:K01109	ko00562,ko01100,ko04070,map00562,map01100,map04070	M00131	R04372,R07299	RC00078	ko00000,ko00001,ko00002,ko01000	-	-	-	-
LEUER_T0000025	usp38	9685.ENSFCAP00000018565	0.0	1310.0	KOG1864@1|root,KOG1864@2759|Eukaryota,38C9M@33154|Opisthokonta,3BB8R@33208|Metazoa,3CW18@33213|Bilateria,484B2@7711|Chordata,490E0@7742|Vertebrata,3J4Y0@40674|Mammalia,3EFEP@33554|Carnivora	33208|Metazoa	O	Ubiquitin specific peptidase 38	USP38	GO:0003674,GO:0003824,GO:0004843,GO:0005488,GO:0005515,GO:0006464,GO:0006508,GO:0006807,GO:0008150,GO:0008152,GO:0008233,GO:0008234,GO:0009892,GO:0009894,GO:0009895,GO:0009987,GO:0010605,GO:0010941,GO:0016579,GO:0016787,GO:0019222,GO:0019538,GO:0019783,GO:0030162,GO:0031323,GO:0031324,GO:0031329,GO:0031330,GO:0032268,GO:0032269,GO:0036211,GO:0036459,GO:0042176,GO:0042177,GO:0042981,GO:0043066,GO:…	3.4.19.12	ko:K11854	-	-	-	-	ko00000,ko01000,ko01002,ko04121	-	-	-	UCH
LEUER_T0000026	gab1	60711.ENSCSAP00000014599	0.0	954.0	KOG3751@1|root,KOG3751@2759|Eukaryota,39Z26@33154|Opisthokonta,3BH08@33208|Metazoa,3CS03@33213|Bilateria,47ZIW@7711|Chordata,490A3@7742|Vertebrata,3J1SX@40674|Mammalia,35BTS@314146|Euarchontoglires,4MKMC@9443|Primates,366D0@314294|Cercopithecoidea	33208|Metazoa	T	binding protein 1	GAB1	GO:0000003,GO:0000165,GO:0000187,GO:0000578,GO:0000902,GO:0000904,GO:0001525,GO:0001568,GO:0001654,GO:0001701,GO:0001745,GO:0001751,GO:0001752,GO:0001754,GO:0001890,GO:0001892,GO:0001932,GO:0001934,GO:0001944,GO:0002376,GO:0003002,GO:0003006,GO:0003674,GO:0003824,GO:0005070,GO:0005488,GO:0005515,GO:0005575,GO:0005622,GO:0005623,GO:0005737,GO:0005829,GO:0005886,GO:0006355,GO:0006357,GO:0006464,GO:…	-	ko:K08091,ko:K09593,ko:K20231	ko01521,ko04012,ko04013,ko04014,ko04071,ko04072,ko04380,ko04664,ko04666,ko04722,ko05100,ko05205,ko05211,ko05220,ko05225,ko05226,map01521,map04012,map04013,map04014,map04071,map04072,map04380,map04664,map04666,map04722,map05100,map05205,map05211,map05220,map05225,map05226	-	-	-	ko00000,ko00001	-	-	-	PH
LEUER_T0000027	gab1	60711.ENSCSAP00000014599	0.0	900.0	KOG3751@1|root,KOG3751@2759|Eukaryota,39Z26@33154|Opisthokonta,3BH08@33208|Metazoa,3CS03@33213|Bilateria,47ZIW@7711|Chordata,490A3@7742|Vertebrata,3J1SX@40674|Mammalia,35BTS@314146|Euarchontoglires,4MKMC@9443|Primates,366D0@314294|Cercopithecoidea	33208|Metazoa	T	binding protein 1	GAB1	GO:0000003,GO:0000165,GO:0000187,GO:0000578,GO:0000902,GO:0000904,GO:0001525,GO:0001568,GO:0001654,GO:0001701,GO:0001745,GO:0001751,GO:0001752,GO:0001754,GO:0001890,GO:0001892,GO:0001932,GO:0001934,GO:0001944,GO:0002376,GO:0003002,GO:0003006,GO:0003674,GO:0003824,GO:0005070,GO:0005488,GO:0005515,GO:0005575,GO:0005622,GO:0005623,GO:0005737,GO:0005829,GO:0005886,GO:0006355,GO:0006357,GO:0006464,GO:…	-	ko:K08091,ko:K09593,ko:K20231	ko01521,ko04012,ko04013,ko04014,ko04071,ko04072,ko04380,ko04664,ko04666,ko04722,ko05100,ko05205,ko05211,ko05220,ko05225,ko05226,map01521,map04012,map04013,map04014,map04071,map04072,map04380,map04664,map04666,map04722,map05100,map05205,map05211,map05220,map05225,map05226	-	-	-	ko00000,ko00001	-	-	-	PH
LEUER_T0000028	gab1	60711.ENSCSAP00000014599	0.0	900.0	KOG3751@1|root,KOG3751@2759|Eukaryota,39Z26@33154|Opisthokonta,3BH08@33208|Metazoa,3CS03@33213|Bilateria,47ZIW@7711|Chordata,490A3@7742|Vertebrata,3J1SX@40674|Mammalia,35BTS@314146|Euarchontoglires,4MKMC@9443|Primates,366D0@314294|Cercopithecoidea	33208|Metazoa	T	binding protein 1	GAB1	GO:0000003,GO:0000165,GO:0000187,GO:0000578,GO:0000902,GO:0000904,GO:0001525,GO:0001568,GO:0001654,GO:0001701,GO:0001745,GO:0001751,GO:0001752,GO:0001754,GO:0001890,GO:0001892,GO:0001932,GO:0001934,GO:0001944,GO:0002376,GO:0003002,GO:0003006,GO:0003674,GO:0003824,GO:0005070,GO:0005488,GO:0005515,GO:0005575,GO:0005622,GO:0005623,GO:0005737,GO:0005829,GO:0005886,GO:0006355,GO:0006357,GO:0006464,GO:…	-	ko:K08091,ko:K09593,ko:K20231	ko01521,ko04012,ko04013,ko04014,ko04071,ko04072,ko04380,ko04664,ko04666,ko04722,ko05100,ko05205,ko05211,ko05220,ko05225,ko05226,map01521,map04012,map04013,map04014,map04071,map04072,map04380,map04664,map04666,map04722,map05100,map05205,map05211,map05220,map05225,map05226	-	-	-	ko00000,ko00001	-	-	-	PH
LEUER_T0000029	gab1	60711.ENSCSAP00000014599	0.0	954.0	KOG3751@1|root,KOG3751@2759|Eukaryota,39Z26@33154|Opisthokonta,3BH08@33208|Metazoa,3CS03@33213|Bilateria,47ZIW@7711|Chordata,490A3@7742|Vertebrata,3J1SX@40674|Mammalia,35BTS@314146|Euarchontoglires,4MKMC@9443|Primates,366D0@314294|Cercopithecoidea	33208|Metazoa	T	binding protein 1	GAB1	GO:0000003,GO:0000165,GO:0000187,GO:0000578,GO:0000902,GO:0000904,GO:0001525,GO:0001568,GO:0001654,GO:0001701,GO:0001745,GO:0001751,GO:0001752,GO:0001754,GO:0001890,GO:0001892,GO:0001932,GO:0001934,GO:0001944,GO:0002376,GO:0003002,GO:0003006,GO:0003674,GO:0003824,GO:0005070,GO:0005488,GO:0005515,GO:0005575,GO:0005622,GO:0005623,GO:0005737,GO:0005829,GO:0005886,GO:0006355,GO:0006357,GO:0006464,GO:…	-	ko:K08091,ko:K09593,ko:K20231	ko01521,ko04012,ko04013,ko04014,ko04071,ko04072,ko04380,ko04664,ko04666,ko04722,ko05100,ko05205,ko05211,ko05220,ko05225,ko05226,map01521,map04012,map04013,map04014,map04071,map04072,map04380,map04664,map04666,map04722,map05100,map05205,map05211,map05220,map05225,map05226	-	-	-	ko00000,ko00001	-	-	-	PH
LEUER_T0000030	gab1	9593.ENSGGOP00000000019	0.0	925.0	KOG3751@1|root,KOG3751@2759|Eukaryota,39Z26@33154|Opisthokonta,3BH08@33208|Metazoa,3CS03@33213|Bilateria,47ZIW@7711|Chordata,490A3@7742|Vertebrata,3J1SX@40674|Mammalia,35BTS@314146|Euarchontoglires,4M9NX@9443|Primates,4MVBA@9604|Hominidae	33208|Metazoa	T	Pleckstrin homology domain.	GAB1	GO:0000003,GO:0000165,GO:0000187,GO:0000578,GO:0000902,GO:0000904,GO:0001525,GO:0001568,GO:0001654,GO:0001701,GO:0001745,GO:0001751,GO:0001752,GO:0001754,GO:0001890,GO:0001892,GO:0001932,GO:0001934,GO:0001944,GO:0002376,GO:0003002,GO:0003006,GO:0003674,GO:0003824,GO:0005070,GO:0005488,GO:0005515,GO:0005575,GO:0005622,GO:0005623,GO:0005737,GO:0005829,GO:0005886,GO:0006355,GO:0006357,GO:0006464,GO:…	-	ko:K08091,ko:K09593,ko:K20231	ko01521,ko04012,ko04013,ko04014,ko04071,ko04072,ko04380,ko04664,ko04666,ko04722,ko05100,ko05205,ko05211,ko05220,ko05225,ko05226,map01521,map04012,map04013,map04014,map04071,map04072,map04380,map04664,map04666,map04722,map05100,map05205,map05211,map05220,map05225,map05226	-	-	-	ko00000,ko00001	-	-	-	PH
LEUER_T0000031	gab1	9593.ENSGGOP00000000019	0.0	925.0	KOG3751@1|root,KOG3751@2759|Eukaryota,39Z26@33154|Opisthokonta,3BH08@33208|Metazoa,3CS03@33213|Bilateria,47ZIW@7711|Chordata,490A3@7742|Vertebrata,3J1SX@40674|Mammalia,35BTS@314146|Euarchontoglires,4M9NX@9443|Primates,4MVBA@9604|Hominidae	33208|Metazoa	T	Pleckstrin homology domain.	GAB1	GO:0000003,GO:0000165,GO:0000187,GO:0000578,GO:0000902,GO:0000904,GO:0001525,GO:0001568,GO:0001654,GO:0001701,GO:0001745,GO:0001751,GO:0001752,GO:0001754,GO:0001890,GO:0001892,GO:0001932,GO:0001934,GO:0001944,GO:0002376,GO:0003002,GO:0003006,GO:0003674,GO:0003824,GO:0005070,GO:0005488,GO:0005515,GO:0005575,GO:0005622,GO:0005623,GO:0005737,GO:0005829,GO:0005886,GO:0006355,GO:0006357,GO:0006464,GO:…	-	ko:K08091,ko:K09593,ko:K20231	ko01521,ko04012,ko04013,ko04014,ko04071,ko04072,ko04380,ko04664,ko04666,ko04722,ko05100,ko05205,ko05211,ko05220,ko05225,ko05226,map01521,map04012,map04013,map04014,map04071,map04072,map04380,map04664,map04666,map04722,map05100,map05205,map05211,map05220,map05225,map05226	-	-	-	ko00000,ko00001	-	-	-	PH
LEUER_T0000032	gab1	13735.ENSPSIP00000004311	0.0	894.0	KOG3751@1|root,KOG3751@2759|Eukaryota,39Z26@33154|Opisthokonta,3BH08@33208|Metazoa,3CS03@33213|Bilateria,47ZIW@7711|Chordata,490A3@7742|Vertebrata,4CGXT@8459|Testudines	33208|Metazoa	T	GRB2-associated-binding protein 1 isoform X1	GAB1	GO:0000003,GO:0000165,GO:0000187,GO:0000578,GO:0000902,GO:0000904,GO:0001525,GO:0001568,GO:0001654,GO:0001701,GO:0001745,GO:0001751,GO:0001752,GO:0001754,GO:0001890,GO:0001892,GO:0001932,GO:0001934,GO:0001944,GO:0002376,GO:0003002,GO:0003006,GO:0003674,GO:0003824,GO:0005070,GO:0005488,GO:0005515,GO:0005575,GO:0005622,GO:0005623,GO:0005737,GO:0005829,GO:0005886,GO:0006355,GO:0006357,GO:0006464,GO:…	-	ko:K08091,ko:K09593,ko:K20231	ko01521,ko04012,ko04013,ko04014,ko04071,ko04072,ko04380,ko04664,ko04666,ko04722,ko05100,ko05205,ko05211,ko05220,ko05225,ko05226,map01521,map04012,map04013,map04014,map04071,map04072,map04380,map04664,map04666,map04722,map05100,map05205,map05211,map05220,map05225,map05226	-	-	-	ko00000,ko00001	-	-	-	PH
LEUER_T0000033	gab1	60711.ENSCSAP00000014599	4.87e-267	758.0	KOG3751@1|root,KOG3751@2759|Eukaryota,39Z26@33154|Opisthokonta,3BH08@33208|Metazoa,3CS03@33213|Bilateria,47ZIW@7711|Chordata,490A3@7742|Vertebrata,3J1SX@40674|Mammalia,35BTS@314146|Euarchontoglires,4MKMC@9443|Primates,366D0@314294|Cercopithecoidea	33208|Metazoa	T	binding protein 1	GAB1	GO:0000003,GO:0000165,GO:0000187,GO:0000578,GO:0000902,GO:0000904,GO:0001525,GO:0001568,GO:0001654,GO:0001701,GO:0001745,GO:0001751,GO:0001752,GO:0001754,GO:0001890,GO:0001892,GO:0001932,GO:0001934,GO:0001944,GO:0002376,GO:0003002,GO:0003006,GO:0003674,GO:0003824,GO:0005070,GO:0005488,GO:0005515,GO:0005575,GO:0005622,GO:0005623,GO:0005737,GO:0005829,GO:0005886,GO:0006355,GO:0006357,GO:0006464,GO:…	-	ko:K08091,ko:K09593,ko:K20231	ko01521,ko04012,ko04013,ko04014,ko04071,ko04072,ko04380,ko04664,ko04666,ko04722,ko05100,ko05205,ko05211,ko05220,ko05225,ko05226,map01521,map04012,map04013,map04014,map04071,map04072,map04380,map04664,map04666,map04722,map05100,map05205,map05211,map05220,map05225,map05226	-	-	-	ko00000,ko00001	-	-	-	PH
LEUER_T0000034	gab1	60711.ENSCSAP00000014599	4.87e-267	758.0	KOG3751@1|root,KOG3751@2759|Eukaryota,39Z26@33154|Opisthokonta,3BH08@33208|Metazoa,3CS03@33213|Bilateria,47ZIW@7711|Chordata,490A3@7742|Vertebrata,3J1SX@40674|Mammalia,35BTS@314146|Euarchontoglires,4MKMC@9443|Primates,366D0@314294|Cercopithecoidea	33208|Metazoa	T	binding protein 1	GAB1	GO:0000003,GO:0000165,GO:0000187,GO:0000578,GO:0000902,GO:0000904,GO:0001525,GO:0001568,GO:0001654,GO:0001701,GO:0001745,GO:0001751,GO:0001752,GO:0001754,GO:0001890,GO:0001892,GO:0001932,GO:0001934,GO:0001944,GO:0002376,GO:0003002,GO:0003006,GO:0003674,GO:0003824,GO:0005070,GO:0005488,GO:0005515,GO:0005575,GO:0005622,GO:0005623,GO:0005737,GO:0005829,GO:0005886,GO:0006355,GO:0006357,GO:0006464,GO:…	-	ko:K08091,ko:K09593,ko:K20231	ko01521,ko04012,ko04013,ko04014,ko04071,ko04072,ko04380,ko04664,ko04666,ko04722,ko05100,ko05205,ko05211,ko05220,ko05225,ko05226,map01521,map04012,map04013,map04014,map04071,map04072,map04380,map04664,map04666,map04722,map05100,map05205,map05211,map05220,map05225,map05226	-	-	-	ko00000,ko00001	-	-	-	PH
LEUER_T0000036	ints10	8496.XP_006268532.1	0.0	1171.0	28HQX@1|root,2QQ28@2759|Eukaryota,38BPD@33154|Opisthokonta,3B9ZV@33208|Metazoa,3CSUT@33213|Bilateria,480V5@7711|Chordata,49588@7742|Vertebrata	33208|Metazoa	S	integrator complex subunit 10	INTS10	GO:0000428,GO:0005575,GO:0005622,GO:0005623,GO:0005634,GO:0005654,GO:0006139,GO:0006351,GO:0006366,GO:0006396,GO:0006725,GO:0006807,GO:0008150,GO:0008152,GO:0009058,GO:0009059,GO:0009301,GO:0009987,GO:0010467,GO:0016070,GO:0016073,GO:0016180,GO:0016591,GO:0018130,GO:0019438,GO:0030880,GO:0031974,GO:0031981,GO:0032039,GO:0032774,GO:0032991,GO:0034470,GO:0034641,GO:0034645,GO:0034654,GO:0034660,GO:…	-	ko:K13147	-	-	-	-	ko00000,ko03041	-	-	-	-
LEUER_T0000035	ints10	7897.ENSLACP00000007738	0.0	1203.0	28HQX@1|root,2QQ28@2759|Eukaryota,38BPD@33154|Opisthokonta,3B9ZV@33208|Metazoa,3CSUT@33213|Bilateria,480V5@7711|Chordata,49588@7742|Vertebrata	33208|Metazoa	S	integrator complex subunit 10	INTS10	GO:0000428,GO:0005575,GO:0005622,GO:0005623,GO:0005634,GO:0005654,GO:0006139,GO:0006351,GO:0006366,GO:0006396,GO:0006725,GO:0006807,GO:0008150,GO:0008152,GO:0009058,GO:0009059,GO:0009301,GO:0009987,GO:0010467,GO:0016070,GO:0016073,GO:0016180,GO:0016591,GO:0018130,GO:0019438,GO:0030880,GO:0031974,GO:0031981,GO:0032039,GO:0032774,GO:0032991,GO:0034470,GO:0034641,GO:0034645,GO:0034654,GO:0034660,GO:…	-	ko:K13147	-	-	-	-	ko00000,ko03041	-	-	-	-
LEUER_T0000038	pgrmc2	9031.ENSGALP00000016583	2.21e-86	259.0	KOG1110@1|root,KOG1110@2759|Eukaryota,3A5JW@33154|Opisthokonta,3BHXS@33208|Metazoa,3CVGS@33213|Bilateria,488HV@7711|Chordata,494FU@7742|Vertebrata,4GWNV@8782|Aves	33208|Metazoa	S	Progesterone receptor membrane component 2	PGRMC2	GO:0003674,GO:0003707,GO:0005488,GO:0005496,GO:0005575,GO:0005622,GO:0005623,GO:0005634,GO:0005635,GO:0005737,GO:0005768,GO:0005886,GO:0007154,GO:0007165,GO:0008150,GO:0008289,GO:0009719,GO:0009725,GO:0009755,GO:0009987,GO:0010033,GO:0012505,GO:0014070,GO:0016020,GO:0016021,GO:0020037,GO:0023052,GO:0030424,GO:0031224,GO:0031410,GO:0031967,GO:0031975,GO:0031982,GO:0032870,GO:0032934,GO:0033993,GO:…	-	ko:K17278	-	-	-	-	ko00000,ko04147	-	-	-	Cyt-b5
LEUER_T0000040	larp1b	13616.ENSMODP00000015406	0.0	975.0	COG5193@1|root,KOG2590@2759|Eukaryota,38EPU@33154|Opisthokonta,3B9XE@33208|Metazoa,3CTZE@33213|Bilateria,481MS@7711|Chordata,48X7M@7742|Vertebrata,3J93B@40674|Mammalia,4JY44@9263|Metatheria	33208|Metazoa	JO	La ribonucleoprotein domain family member 1B	LARP1B	GO:0000001,GO:0000003,GO:0000212,GO:0000226,GO:0000278,GO:0000280,GO:0000932,GO:0003674,GO:0003676,GO:0003723,GO:0003727,GO:0005488,GO:0005575,GO:0005622,GO:0005623,GO:0005737,GO:0005739,GO:0005829,GO:0006996,GO:0007005,GO:0007010,GO:0007017,GO:0007049,GO:0007051,GO:0007053,GO:0007140,GO:0007275,GO:0007276,GO:0008150,GO:0008187,GO:0008266,GO:0009790,GO:0009987,GO:0016043,GO:0019953,GO:0022402,GO:…	-	ko:K18757	-	-	-	-	ko00000,ko03019	-	-	-	La
LEUER_T0000039	larp1b	7897.ENSLACP00000017310	0.0	1071.0	COG5193@1|root,KOG2590@2759|Eukaryota,38EPU@33154|Opisthokonta,3B9XE@33208|Metazoa,3CTZE@33213|Bilateria,481MS@7711|Chordata,48X7M@7742|Vertebrata	33208|Metazoa	JO	La ribonucleoprotein domain family member	LARP1B	GO:0000001,GO:0000003,GO:0000212,GO:0000226,GO:0000278,GO:0000280,GO:0000932,GO:0003674,GO:0003676,GO:0003723,GO:0003727,GO:0005488,GO:0005575,GO:0005622,GO:0005623,GO:0005737,GO:0005739,GO:0005829,GO:0006996,GO:0007005,GO:0007010,GO:0007017,GO:0007049,GO:0007051,GO:0007053,GO:0007140,GO:0007275,GO:0007276,GO:0008150,GO:0008187,GO:0008266,GO:0009790,GO:0009987,GO:0016043,GO:0019953,GO:0022402,GO:…	-	ko:K18757	-	-	-	-	ko00000,ko03019	-	-	-	La
LEUER_T0000041	abhd18	8496.XP_006274059.1	2.39e-258	717.0	KOG1551@1|root,KOG1551@2759|Eukaryota,39RR0@33154|Opisthokonta,3BIH9@33208|Metazoa,3D04A@33213|Bilateria,4858E@7711|Chordata,48XFU@7742|Vertebrata	33208|Metazoa	S	Abhydrolase domain containing 18	C4orf29	-	-	-	-	-	-	-	-	-	-	-	DUF2048
LEUER_T0000046	abhd18	8469.XP_007059214.1	3.13e-168	483.0	KOG1551@1|root,KOG1551@2759|Eukaryota,39RR0@33154|Opisthokonta,3BIH9@33208|Metazoa,3D04A@33213|Bilateria,4858E@7711|Chordata,48XFU@7742|Vertebrata,4CAYV@8459|Testudines	33208|Metazoa	S	Abhydrolase domain containing 18	C4orf29	-	-	-	-	-	-	-	-	-	-	-	DUF2048
LEUER_T0000045	abhd18	8469.XP_007059214.1	3.13e-168	483.0	KOG1551@1|root,KOG1551@2759|Eukaryota,39RR0@33154|Opisthokonta,3BIH9@33208|Metazoa,3D04A@33213|Bilateria,4858E@7711|Chordata,48XFU@7742|Vertebrata,4CAYV@8459|Testudines	33208|Metazoa	S	Abhydrolase domain containing 18	C4orf29	-	-	-	-	-	-	-	-	-	-	-	DUF2048
LEUER_T0000044	abhd18	8496.XP_006274059.1	2.39e-258	717.0	KOG1551@1|root,KOG1551@2759|Eukaryota,39RR0@33154|Opisthokonta,3BIH9@33208|Metazoa,3D04A@33213|Bilateria,4858E@7711|Chordata,48XFU@7742|Vertebrata	33208|Metazoa	S	Abhydrolase domain containing 18	C4orf29	-	-	-	-	-	-	-	-	-	-	-	DUF2048
LEUER_T0000042	abhd18	8496.XP_006274059.1	2.39e-258	717.0	KOG1551@1|root,KOG1551@2759|Eukaryota,39RR0@33154|Opisthokonta,3BIH9@33208|Metazoa,3D04A@33213|Bilateria,4858E@7711|Chordata,48XFU@7742|Vertebrata	33208|Metazoa	S	Abhydrolase domain containing 18	C4orf29	-	-	-	-	-	-	-	-	-	-	-	DUF2048
LEUER_T0000043	abhd18	8496.XP_006274059.1	2.39e-258	717.0	KOG1551@1|root,KOG1551@2759|Eukaryota,39RR0@33154|Opisthokonta,3BIH9@33208|Metazoa,3D04A@33213|Bilateria,4858E@7711|Chordata,48XFU@7742|Vertebrata	33208|Metazoa	S	Abhydrolase domain containing 18	C4orf29	-	-	-	-	-	-	-	-	-	-	-	DUF2048
LEUER_T0000047	mfsd8	34839.XP_005386792.1	5.72e-230	650.0	KOG2325@1|root,KOG2325@2759|Eukaryota,39B11@33154|Opisthokonta,3BGDR@33208|Metazoa,3CR72@33213|Bilateria,48579@7711|Chordata,49352@7742|Vertebrata,3JF9Q@40674|Mammalia,35EM3@314146|Euarchontoglires,4PZJJ@9989|Rodentia	33208|Metazoa	S	Major facilitator superfamily domain-containing protein 8	MFSD8	GO:0000323,GO:0005575,GO:0005622,GO:0005623,GO:0005634,GO:0005654,GO:0005737,GO:0005764,GO:0005773,GO:0005886,GO:0005887,GO:0006996,GO:0007033,GO:0007040,GO:0007275,GO:0007399,GO:0008150,GO:0009894,GO:0009987,GO:0010506,GO:0014069,GO:0016020,GO:0016021,GO:0016043,GO:0019222,GO:0022008,GO:0030154,GO:0030182,GO:0031224,GO:0031226,GO:0031323,GO:0031329,GO:0031974,GO:0031981,GO:0032279,GO:0032501,GO:…	-	ko:K12307	ko04142,map04142	-	-	-	ko00000,ko00001,ko02000	2.A.1	-	-	MFS_1
LEUER_T0000048	mfsd8	10141.ENSCPOP00000014044	1.87e-192	550.0	KOG2325@1|root,KOG2325@2759|Eukaryota,39B11@33154|Opisthokonta,3BGDR@33208|Metazoa,3CR72@33213|Bilateria,48579@7711|Chordata,49352@7742|Vertebrata,3JF9Q@40674|Mammalia,35EM3@314146|Euarchontoglires,4PZJJ@9989|Rodentia	33208|Metazoa	S	Major facilitator superfamily domain-containing protein 8	MFSD8	GO:0000323,GO:0005575,GO:0005622,GO:0005623,GO:0005634,GO:0005654,GO:0005737,GO:0005764,GO:0005773,GO:0005886,GO:0005887,GO:0006996,GO:0007033,GO:0007040,GO:0007275,GO:0007399,GO:0008150,GO:0009894,GO:0009987,GO:0010506,GO:0014069,GO:0016020,GO:0016021,GO:0016043,GO:0019222,GO:0022008,GO:0030154,GO:0030182,GO:0031224,GO:0031226,GO:0031323,GO:0031329,GO:0031974,GO:0031981,GO:0032279,GO:0032501,GO:…	-	ko:K12307	ko04142,map04142	-	-	-	ko00000,ko00001,ko02000	2.A.1	-	-	MFS_1
LEUER_T0000049	plk4	7897.ENSLACP00000018364	0.0	1066.0	KOG0575@1|root,KOG0575@2759|Eukaryota,38FF0@33154|Opisthokonta,3B9H9@33208|Metazoa,3CZ7U@33213|Bilateria,480U8@7711|Chordata,4985C@7742|Vertebrata	33208|Metazoa	T	positive regulation of centriole replication	PLK4	GO:0000003,GO:0000086,GO:0000226,GO:0000278,GO:0000280,GO:0000803,GO:0001578,GO:0001701,GO:0001741,GO:0001890,GO:0001892,GO:0003006,GO:0003674,GO:0003824,GO:0004672,GO:0004674,GO:0005488,GO:0005515,GO:0005575,GO:0005622,GO:0005623,GO:0005634,GO:0005694,GO:0005730,GO:0005737,GO:0005813,GO:0005814,GO:0005815,GO:0005829,GO:0005856,GO:0005886,GO:0006464,GO:0006468,GO:0006793,GO:0006796,GO:0006807,GO:…	2.7.11.21	ko:K08863	ko04068,map04068	-	-	-	ko00000,ko00001,ko01000,ko01001,ko03036	-	-	-	POLO_box,Pkinase
LEUER_T0000051	hspa4l	181119.XP_005525595.1	0.0	1113.0	COG0443@1|root,KOG0103@2759|Eukaryota,38HTW@33154|Opisthokonta,3B9EM@33208|Metazoa,3CSN8@33213|Bilateria,486JX@7711|Chordata,496XI@7742|Vertebrata,4GU4M@8782|Aves	33208|Metazoa	O	Heat shock 70 kDa protein 4L	HSPA4L	GO:0000166,GO:0003674,GO:0005488,GO:0005524,GO:0005575,GO:0005622,GO:0005623,GO:0005634,GO:0005737,GO:0005829,GO:0006457,GO:0006950,GO:0006986,GO:0007275,GO:0007568,GO:0008144,GO:0008150,GO:0008340,GO:0009987,GO:0010033,GO:0010259,GO:0017076,GO:0030554,GO:0032501,GO:0032502,GO:0032553,GO:0032555,GO:0032559,GO:0035639,GO:0035966,GO:0036094,GO:0042221,GO:0043167,GO:0043168,GO:0043226,GO:0043227,GO:…	-	ko:K09485,ko:K09489	ko04141,ko04530,ko04612,map04141,map04530,map04612	-	-	-	ko00000,ko00001,ko03110	1.A.33	-	-	HSP70,MreB_Mbl
LEUER_T0000052	slc25a31	72004.XP_005904876.1	2.81e-176	498.0	KOG0749@1|root,KOG0749@2759|Eukaryota,38B82@33154|Opisthokonta,3B9K3@33208|Metazoa,3CTAF@33213|Bilateria,485UG@7711|Chordata,499I4@7742|Vertebrata,3J2AC@40674|Mammalia,4J26H@91561|Cetartiodactyla	33208|Metazoa	C	Solute carrier family 25	SLC25A31	GO:0003674,GO:0005215,GO:0005575,GO:0005622,GO:0005623,GO:0005737,GO:0005739,GO:0005740,GO:0005743,GO:0005929,GO:0006810,GO:0006839,GO:0008150,GO:0016020,GO:0016021,GO:0019866,GO:0022857,GO:0031090,GO:0031224,GO:0031514,GO:0031966,GO:0031967,GO:0031975,GO:0042995,GO:0043226,GO:0043227,GO:0043229,GO:0043231,GO:0044422,GO:0044424,GO:0044425,GO:0044429,GO:0044444,GO:0044446,GO:0044464,GO:0051179,GO:…	-	ko:K05863	ko04020,ko04022,ko04217,ko04218,ko05012,ko05016,ko05166,map04020,map04022,map04217,map04218,map05012,map05016,map05166	-	-	-	ko00000,ko00001,ko02000,ko03029	2.A.29.1	-	-	Mito_carr
LEUER_T0000053	intu	8479.XP_008172020.1	0.0	1100.0	28I9D@1|root,2QQJQ@2759|Eukaryota,38PSA@33154|Opisthokonta,3BMZF@33208|Metazoa,3CSHU@33213|Bilateria,489CH@7711|Chordata,48V36@7742|Vertebrata,4CFNT@8459|Testudines	33208|Metazoa	S	Inturned planar cell polarity protein	INTU	GO:0001736,GO:0001737,GO:0001738,GO:0001942,GO:0002009,GO:0002165,GO:0003002,GO:0005575,GO:0005622,GO:0005623,GO:0005737,GO:0005815,GO:0005856,GO:0005886,GO:0005929,GO:0006996,GO:0007164,GO:0007275,GO:0007389,GO:0007399,GO:0007417,GO:0007444,GO:0007472,GO:0007476,GO:0007552,GO:0007560,GO:0008150,GO:0008285,GO:0008544,GO:0008589,GO:0009653,GO:0009790,GO:0009791,GO:0009792,GO:0009886,GO:0009887,GO:…	-	ko:K16632	-	-	-	-	ko00000,ko01000,ko03019	-	-	-	-
LEUER_T0000054	intu	8479.XP_008172020.1	0.0	1097.0	28I9D@1|root,2QQJQ@2759|Eukaryota,38PSA@33154|Opisthokonta,3BMZF@33208|Metazoa,3CSHU@33213|Bilateria,489CH@7711|Chordata,48V36@7742|Vertebrata,4CFNT@8459|Testudines	33208|Metazoa	S	Inturned planar cell polarity protein	INTU	GO:0001736,GO:0001737,GO:0001738,GO:0001942,GO:0002009,GO:0002165,GO:0003002,GO:0005575,GO:0005622,GO:0005623,GO:0005737,GO:0005815,GO:0005856,GO:0005886,GO:0005929,GO:0006996,GO:0007164,GO:0007275,GO:0007389,GO:0007399,GO:0007417,GO:0007444,GO:0007472,GO:0007476,GO:0007552,GO:0007560,GO:0008150,GO:0008285,GO:0008544,GO:0008589,GO:0009653,GO:0009790,GO:0009791,GO:0009792,GO:0009886,GO:0009887,GO:…	-	ko:K16632	-	-	-	-	ko00000,ko01000,ko03019	-	-	-	-
LEUER_T0000056	intu	8479.XP_008172020.1	0.0	1014.0	28I9D@1|root,2QQJQ@2759|Eukaryota,38PSA@33154|Opisthokonta,3BMZF@33208|Metazoa,3CSHU@33213|Bilateria,489CH@7711|Chordata,48V36@7742|Vertebrata,4CFNT@8459|Testudines	33208|Metazoa	S	Inturned planar cell polarity protein	INTU	GO:0001736,GO:0001737,GO:0001738,GO:0001942,GO:0002009,GO:0002165,GO:0003002,GO:0005575,GO:0005622,GO:0005623,GO:0005737,GO:0005815,GO:0005856,GO:0005886,GO:0005929,GO:0006996,GO:0007164,GO:0007275,GO:0007389,GO:0007399,GO:0007417,GO:0007444,GO:0007472,GO:0007476,GO:0007552,GO:0007560,GO:0008150,GO:0008285,GO:0008544,GO:0008589,GO:0009653,GO:0009790,GO:0009791,GO:0009792,GO:0009886,GO:0009887,GO:…	-	ko:K16632	-	-	-	-	ko00000,ko01000,ko03019	-	-	-	-
LEUER_T0000055	intu	8469.XP_007059210.1	0.0	1135.0	28I9D@1|root,2QQJQ@2759|Eukaryota,38PSA@33154|Opisthokonta,3BMZF@33208|Metazoa,3CSHU@33213|Bilateria,489CH@7711|Chordata,48V36@7742|Vertebrata,4CFNT@8459|Testudines	33208|Metazoa	S	Inturned planar cell polarity protein	INTU	GO:0001736,GO:0001737,GO:0001738,GO:0001942,GO:0002009,GO:0002165,GO:0003002,GO:0005575,GO:0005622,GO:0005623,GO:0005737,GO:0005815,GO:0005856,GO:0005886,GO:0005929,GO:0006996,GO:0007164,GO:0007275,GO:0007389,GO:0007399,GO:0007417,GO:0007444,GO:0007472,GO:0007476,GO:0007552,GO:0007560,GO:0008150,GO:0008285,GO:0008544,GO:0008589,GO:0009653,GO:0009790,GO:0009791,GO:0009792,GO:0009886,GO:0009887,GO:…	-	ko:K16632	-	-	-	-	ko00000,ko01000,ko03019	-	-	-	-
LEUER_T0000057	LOC116968299	7897.ENSLACP00000019610	3.29e-188	543.0	COG5273@1|root,KOG0509@2759|Eukaryota,38BPT@33154|Opisthokonta,3BG57@33208|Metazoa,3CYJA@33213|Bilateria,48B99@7711|Chordata,495X8@7742|Vertebrata	33208|Metazoa	S	Pfam:zf-DHHC	-	GO:0003674,GO:0003824,GO:0005575,GO:0005622,GO:0005623,GO:0005737,GO:0005794,GO:0006464,GO:0006497,GO:0006807,GO:0008150,GO:0008152,GO:0009058,GO:0009059,GO:0009987,GO:0012505,GO:0016409,GO:0016417,GO:0016740,GO:0016746,GO:0016747,GO:0018345,GO:0019538,GO:0019706,GO:0019707,GO:0034645,GO:0036211,GO:0042157,GO:0042158,GO:0043170,GO:0043226,GO:0043227,GO:0043229,GO:0043231,GO:0043412,GO:0043543,GO:…	2.3.1.225	ko:K20032	-	-	-	-	ko00000,ko01000,ko04131	9.B.37.1,9.B.37.3	-	-	Ank_2,Ank_3,Ank_4,Ank_5,DHHC
LEUER_T0000058	LOC116968299	7897.ENSLACP00000019610	1.74e-135	404.0	COG5273@1|root,KOG0509@2759|Eukaryota,38BPT@33154|Opisthokonta,3BG57@33208|Metazoa,3CYJA@33213|Bilateria,48B99@7711|Chordata,495X8@7742|Vertebrata	33208|Metazoa	S	Pfam:zf-DHHC	-	GO:0003674,GO:0003824,GO:0005575,GO:0005622,GO:0005623,GO:0005737,GO:0005794,GO:0006464,GO:0006497,GO:0006807,GO:0008150,GO:0008152,GO:0009058,GO:0009059,GO:0009987,GO:0012505,GO:0016409,GO:0016417,GO:0016740,GO:0016746,GO:0016747,GO:0018345,GO:0019538,GO:0019706,GO:0019707,GO:0034645,GO:0036211,GO:0042157,GO:0042158,GO:0043170,GO:0043226,GO:0043227,GO:0043229,GO:0043231,GO:0043412,GO:0043543,GO:…	2.3.1.225	ko:K20032	-	-	-	-	ko00000,ko01000,ko04131	9.B.37.1,9.B.37.3	-	-	Ank_2,Ank_3,Ank_4,Ank_5,DHHC
LEUER_T0000059	fat4	8479.XP_005309426.1	0.0	6836.0	KOG1217@1|root,KOG3594@1|root,KOG1217@2759|Eukaryota,KOG3594@2759|Eukaryota,38CZH@33154|Opisthokonta,3B9B2@33208|Metazoa,3E5CS@33213|Bilateria,4878D@7711|Chordata,48YZ4@7742|Vertebrata,4CB1Y@8459|Testudines	33208|Metazoa	T	Laminin G domain	FAT4	GO:0001501,GO:0001503,GO:0001655,GO:0001657,GO:0001658,GO:0001736,GO:0001738,GO:0001763,GO:0001822,GO:0001823,GO:0002009,GO:0003007,GO:0005575,GO:0005623,GO:0007009,GO:0007154,GO:0007155,GO:0007157,GO:0007164,GO:0007165,GO:0007166,GO:0007167,GO:0007169,GO:0007219,GO:0007275,GO:0007399,GO:0007417,GO:0007420,GO:0007423,GO:0007507,GO:0008150,GO:0008283,GO:0008543,GO:0009653,GO:0009719,GO:0009887,GO:…	-	ko:K16507,ko:K16669	ko04391,ko04392,map04391,map04392	-	-	-	ko00000,ko00001,ko04516	-	-	-	Cadherin,EGF,Laminin_G_2,hEGF
LEUER_T0000061	ankrd50	7897.ENSLACP00000007019	0.0	958.0	COG0666@1|root,KOG0504@2759|Eukaryota,39YNX@33154|Opisthokonta,3BFJC@33208|Metazoa,3CU3G@33213|Bilateria,483Z6@7711|Chordata,498RE@7742|Vertebrata	33208|Metazoa	S	Ankyrin repeats (many copies)	ANKRD50	GO:0006810,GO:0008150,GO:0016192,GO:0016197,GO:0046907,GO:0051179,GO:0051234,GO:0051641,GO:0051649,GO:0098876,GO:1990126	-	ko:K21440	-	-	-	-	ko00000,ko04131	-	-	-	Ank_2,Ank_4,Ank_5
LEUER_T0000062	ankrd50	7897.ENSLACP00000007019	9.53e-280	835.0	COG0666@1|root,KOG0504@2759|Eukaryota,39YNX@33154|Opisthokonta,3BFJC@33208|Metazoa,3CU3G@33213|Bilateria,483Z6@7711|Chordata,498RE@7742|Vertebrata	33208|Metazoa	S	Ankyrin repeats (many copies)	ANKRD50	GO:0006810,GO:0008150,GO:0016192,GO:0016197,GO:0046907,GO:0051179,GO:0051234,GO:0051641,GO:0051649,GO:0098876,GO:1990126	-	ko:K21440	-	-	-	-	ko00000,ko04131	-	-	-	Ank_2,Ank_4,Ank_5
LEUER_T0000063	LOC116970929	31033.ENSTRUP00000034159	9.23e-83	251.0	COG0099@1|root,KOG3311@2759|Eukaryota,39ZZ4@33154|Opisthokonta,3BBA9@33208|Metazoa,3CYJW@33213|Bilateria,48B6G@7711|Chordata,48WYW@7742|Vertebrata,49Z5I@7898|Actinopterygii	33208|Metazoa	J	Ribosomal protein S18	RPS18	GO:0003674,GO:0003735,GO:0005198,GO:0005575,GO:0005622,GO:0005623,GO:0005737,GO:0005829,GO:0005840,GO:0006412,GO:0006518,GO:0006807,GO:0008150,GO:0008152,GO:0009058,GO:0009059,GO:0009987,GO:0010467,GO:0015935,GO:0019538,GO:0022613,GO:0032991,GO:0034641,GO:0034645,GO:0042254,GO:0043043,GO:0043170,GO:0043226,GO:0043228,GO:0043229,GO:0043232,GO:0043603,GO:0043604,GO:0044085,GO:0044237,GO:0044238,GO:…	-	ko:K02964	ko03010,map03010	M00177	-	-	br01610,ko00000,ko00001,ko00002,ko03011	-	-	-	Ribosomal_S13
LEUER_T0000064	LOC116968737	28377.ENSACAP00000013169	2.93e-55	178.0	KOG4812@1|root,KOG4812@2759|Eukaryota,3A11N@33154|Opisthokonta,3BAK7@33208|Metazoa,3CXH4@33213|Bilateria,48A2G@7711|Chordata,495ZF@7742|Vertebrata	33208|Metazoa	S	negative regulation of isotype switching to IgE isotypes	NDFIP1	GO:0000018,GO:0000139,GO:0000151,GO:0001817,GO:0001818,GO:0002637,GO:0002638,GO:0002682,GO:0002683,GO:0002694,GO:0002695,GO:0002697,GO:0002698,GO:0002700,GO:0002701,GO:0002703,GO:0002704,GO:0002706,GO:0002707,GO:0002712,GO:0002713,GO:0002761,GO:0002819,GO:0002820,GO:0002822,GO:0002823,GO:0002828,GO:0002829,GO:0002889,GO:0002890,GO:0003674,GO:0005488,GO:0005515,GO:0005575,GO:0005622,GO:0005623,GO:…	-	-	-	-	-	-	-	-	-	-	DUF2370
LEUER_T0000068	spry1	7897.ENSLACP00000017501	3.55e-154	441.0	2CAWB@1|root,2QSDN@2759|Eukaryota,38GBS@33154|Opisthokonta,3BBFM@33208|Metazoa,3D2VU@33213|Bilateria,48ACW@7711|Chordata,48WGH@7742|Vertebrata	33208|Metazoa	S	epithelial to mesenchymal transition involved in cardiac fibroblast development	SPRY1	GO:0000132,GO:0000226,GO:0000278,GO:0001655,GO:0001656,GO:0001657,GO:0001759,GO:0001763,GO:0001822,GO:0001823,GO:0001837,GO:0001932,GO:0001933,GO:0002009,GO:0003007,GO:0003156,GO:0003401,GO:0005575,GO:0005622,GO:0005623,GO:0005634,GO:0005654,GO:0005737,GO:0005794,GO:0005829,GO:0005886,GO:0006469,GO:0006996,GO:0007010,GO:0007017,GO:0007049,GO:0007163,GO:0007275,GO:0007507,GO:0008150,GO:0008285,GO:…	-	ko:K04704	-	-	-	-	ko00000	-	-	-	Sprouty
LEUER_T0000067	spry1	7897.ENSLACP00000017501	3.55e-154	441.0	2CAWB@1|root,2QSDN@2759|Eukaryota,38GBS@33154|Opisthokonta,3BBFM@33208|Metazoa,3D2VU@33213|Bilateria,48ACW@7711|Chordata,48WGH@7742|Vertebrata	33208|Metazoa	S	epithelial to mesenchymal transition involved in cardiac fibroblast development	SPRY1	GO:0000132,GO:0000226,GO:0000278,GO:0001655,GO:0001656,GO:0001657,GO:0001759,GO:0001763,GO:0001822,GO:0001823,GO:0001837,GO:0001932,GO:0001933,GO:0002009,GO:0003007,GO:0003156,GO:0003401,GO:0005575,GO:0005622,GO:0005623,GO:0005634,GO:0005654,GO:0005737,GO:0005794,GO:0005829,GO:0005886,GO:0006469,GO:0006996,GO:0007010,GO:0007017,GO:0007049,GO:0007163,GO:0007275,GO:0007507,GO:0008150,GO:0008285,GO:…	-	ko:K04704	-	-	-	-	ko00000	-	-	-	Sprouty
LEUER_T0000065	spry1	7897.ENSLACP00000017501	3.55e-154	441.0	2CAWB@1|root,2QSDN@2759|Eukaryota,38GBS@33154|Opisthokonta,3BBFM@33208|Metazoa,3D2VU@33213|Bilateria,48ACW@7711|Chordata,48WGH@7742|Vertebrata	33208|Metazoa	S	epithelial to mesenchymal transition involved in cardiac fibroblast development	SPRY1	GO:0000132,GO:0000226,GO:0000278,GO:0001655,GO:0001656,GO:0001657,GO:0001759,GO:0001763,GO:0001822,GO:0001823,GO:0001837,GO:0001932,GO:0001933,GO:0002009,GO:0003007,GO:0003156,GO:0003401,GO:0005575,GO:0005622,GO:0005623,GO:0005634,GO:0005654,GO:0005737,GO:0005794,GO:0005829,GO:0005886,GO:0006469,GO:0006996,GO:0007010,GO:0007017,GO:0007049,GO:0007163,GO:0007275,GO:0007507,GO:0008150,GO:0008285,GO:…	-	ko:K04704	-	-	-	-	ko00000	-	-	-	Sprouty
LEUER_T0000066	spry1	7897.ENSLACP00000017501	3.55e-154	441.0	2CAWB@1|root,2QSDN@2759|Eukaryota,38GBS@33154|Opisthokonta,3BBFM@33208|Metazoa,3D2VU@33213|Bilateria,48ACW@7711|Chordata,48WGH@7742|Vertebrata	33208|Metazoa	S	epithelial to mesenchymal transition involved in cardiac fibroblast development	SPRY1	GO:0000132,GO:0000226,GO:0000278,GO:0001655,GO:0001656,GO:0001657,GO:0001759,GO:0001763,GO:0001822,GO:0001823,GO:0001837,GO:0001932,GO:0001933,GO:0002009,GO:0003007,GO:0003156,GO:0003401,GO:0005575,GO:0005622,GO:0005623,GO:0005634,GO:0005654,GO:0005737,GO:0005794,GO:0005829,GO:0005886,GO:0006469,GO:0006996,GO:0007010,GO:0007017,GO:0007049,GO:0007163,GO:0007275,GO:0007507,GO:0008150,GO:0008285,GO:…	-	ko:K04704	-	-	-	-	ko00000	-	-	-	Sprouty
LEUER_T0000069	spry1	7897.ENSLACP00000017501	3.55e-154	441.0	2CAWB@1|root,2QSDN@2759|Eukaryota,38GBS@33154|Opisthokonta,3BBFM@33208|Metazoa,3D2VU@33213|Bilateria,48ACW@7711|Chordata,48WGH@7742|Vertebrata	33208|Metazoa	S	epithelial to mesenchymal transition involved in cardiac fibroblast development	SPRY1	GO:0000132,GO:0000226,GO:0000278,GO:0001655,GO:0001656,GO:0001657,GO:0001759,GO:0001763,GO:0001822,GO:0001823,GO:0001837,GO:0001932,GO:0001933,GO:0002009,GO:0003007,GO:0003156,GO:0003401,GO:0005575,GO:0005622,GO:0005623,GO:0005634,GO:0005654,GO:0005737,GO:0005794,GO:0005829,GO:0005886,GO:0006469,GO:0006996,GO:0007010,GO:0007017,GO:0007049,GO:0007163,GO:0007275,GO:0007507,GO:0008150,GO:0008285,GO:…	-	ko:K04704	-	-	-	-	ko00000	-	-	-	Sprouty
LEUER_T0000070	spry1	7897.ENSLACP00000017501	3.55e-154	441.0	2CAWB@1|root,2QSDN@2759|Eukaryota,38GBS@33154|Opisthokonta,3BBFM@33208|Metazoa,3D2VU@33213|Bilateria,48ACW@7711|Chordata,48WGH@7742|Vertebrata	33208|Metazoa	S	epithelial to mesenchymal transition involved in cardiac fibroblast development	SPRY1	GO:0000132,GO:0000226,GO:0000278,GO:0001655,GO:0001656,GO:0001657,GO:0001759,GO:0001763,GO:0001822,GO:0001823,GO:0001837,GO:0001932,GO:0001933,GO:0002009,GO:0003007,GO:0003156,GO:0003401,GO:0005575,GO:0005622,GO:0005623,GO:0005634,GO:0005654,GO:0005737,GO:0005794,GO:0005829,GO:0005886,GO:0006469,GO:0006996,GO:0007010,GO:0007017,GO:0007049,GO:0007163,GO:0007275,GO:0007507,GO:0008150,GO:0008285,GO:…	-	ko:K04704	-	-	-	-	ko00000	-	-	-	Sprouty
LEUER_T0000072	spata5	38654.XP_006015687.1	3.65e-272	776.0	COG0464@1|root,KOG0730@2759|Eukaryota,38CYE@33154|Opisthokonta,3BB5Y@33208|Metazoa,3CUQX@33213|Bilateria,47ZCE@7711|Chordata,494BQ@7742|Vertebrata	33208|Metazoa	O	Spermatogenesis associated 5	SPATA5	GO:0001655,GO:0001657,GO:0001658,GO:0001763,GO:0001822,GO:0001823,GO:0001932,GO:0001933,GO:0002009,GO:0003674,GO:0003824,GO:0004857,GO:0004860,GO:0005102,GO:0005178,GO:0005488,GO:0005515,GO:0005575,GO:0005622,GO:0005623,GO:0005737,GO:0006469,GO:0007275,GO:0007399,GO:0007417,GO:0007420,GO:0008150,GO:0009653,GO:0009887,GO:0009888,GO:0009892,GO:0010563,GO:0010594,GO:0010595,GO:0010605,GO:0010632,GO:…	-	ko:K13525,ko:K14575	ko03008,ko04141,ko05134,map03008,map04141,map05134	M00400,M00403	-	-	ko00000,ko00001,ko00002,ko03009,ko03019,ko04131,ko04147	3.A.16.1	-	-	AAA
LEUER_T0000071	spata5	8479.XP_005290405.1	6.27e-272	778.0	COG0464@1|root,KOG0730@2759|Eukaryota,38CYE@33154|Opisthokonta,3BB5Y@33208|Metazoa,3CUQX@33213|Bilateria,47ZCE@7711|Chordata,494BQ@7742|Vertebrata,4CBQ4@8459|Testudines	33208|Metazoa	O	Cell division protein 48 (CDC48) N-terminal domain	SPATA5	GO:0001655,GO:0001657,GO:0001658,GO:0001763,GO:0001822,GO:0001823,GO:0001932,GO:0001933,GO:0002009,GO:0003674,GO:0003824,GO:0004857,GO:0004860,GO:0005102,GO:0005178,GO:0005488,GO:0005515,GO:0005575,GO:0005622,GO:0005623,GO:0005737,GO:0006469,GO:0007275,GO:0007399,GO:0007417,GO:0007420,GO:0008150,GO:0009653,GO:0009887,GO:0009888,GO:0009892,GO:0010563,GO:0010594,GO:0010595,GO:0010605,GO:0010632,GO:…	-	ko:K13525,ko:K14575	ko03008,ko04141,ko05134,map03008,map04141,map05134	M00400,M00403	-	-	ko00000,ko00001,ko00002,ko03009,ko03019,ko04131,ko04147	3.A.16.1	-	-	AAA
LEUER_T0000073	nudt6	8469.XP_007056886.1	3.08e-138	399.0	KOG0648@1|root,KOG0648@2759|Eukaryota,38G3I@33154|Opisthokonta,3B9ZP@33208|Metazoa,3D0IP@33213|Bilateria,483UB@7711|Chordata,48WI7@7742|Vertebrata,4CBV4@8459|Testudines	33208|Metazoa	T	Nucleoside diphosphate-linked moiety X motif 6	NUDT6	GO:0003674,GO:0005102,GO:0005488,GO:0005515,GO:0005575,GO:0005622,GO:0005623,GO:0005634,GO:0005737,GO:0005739,GO:0008083,GO:0008150,GO:0009966,GO:0010469,GO:0010646,GO:0023051,GO:0030545,GO:0043226,GO:0043227,GO:0043229,GO:0043231,GO:0044424,GO:0044444,GO:0044464,GO:0048018,GO:0048583,GO:0050789,GO:0050794,GO:0065007,GO:0065009,GO:0098772	-	-	-	-	-	-	-	-	-	-	NUDIX
LEUER_T0000074	fgf2	7897.ENSLACP00000019200	2.18e-85	254.0	KOG3885@1|root,KOG3885@2759|Eukaryota,39WIG@33154|Opisthokonta,3BHFM@33208|Metazoa,3D137@33213|Bilateria,483NG@7711|Chordata,498IX@7742|Vertebrata	33208|Metazoa	T	Fibroblast growth factor 2	FGF2	GO:0000165,GO:0000186,GO:0000187,GO:0001501,GO:0001525,GO:0001568,GO:0001654,GO:0001655,GO:0001656,GO:0001657,GO:0001658,GO:0001667,GO:0001704,GO:0001707,GO:0001759,GO:0001763,GO:0001822,GO:0001823,GO:0001837,GO:0001894,GO:0001932,GO:0001934,GO:0001936,GO:0001938,GO:0001944,GO:0002009,GO:0002040,GO:0002042,GO:0002065,GO:0002067,GO:0002088,GO:0002089,GO:0003156,GO:0003347,GO:0003407,GO:0003674,GO:…	-	ko:K18496,ko:K18497	ko01521,ko04010,ko04014,ko04015,ko04151,ko04390,ko04550,ko04810,ko05167,ko05200,ko05205,ko05218,ko05224,ko05226,map01521,map04010,map04014,map04015,map04151,map04390,map04550,map04810,map05167,map05200,map05205,map05218,map05224,map05226	-	-	-	ko00000,ko00001,ko00536,ko04052,ko04516	-	-	-	FGF
LEUER_T0000075	bbs12	7897.ENSLACP00000001386	1.02e-159	484.0	28NCY@1|root,2QUYD@2759|Eukaryota,39W2V@33154|Opisthokonta,3BM53@33208|Metazoa,3CUE3@33213|Bilateria,48734@7711|Chordata,48YEC@7742|Vertebrata	33208|Metazoa	S	chaperone-mediated protein complex assembly	BBS12	GO:0001894,GO:0001895,GO:0003674,GO:0005488,GO:0005515,GO:0005575,GO:0005622,GO:0005623,GO:0005737,GO:0005829,GO:0005832,GO:0006457,GO:0006458,GO:0006810,GO:0006928,GO:0006996,GO:0007017,GO:0007018,GO:0007610,GO:0007631,GO:0008150,GO:0009987,GO:0010970,GO:0016043,GO:0022607,GO:0030030,GO:0030705,GO:0031503,GO:0032501,GO:0032991,GO:0034622,GO:0042073,GO:0042592,GO:0042755,GO:0043933,GO:0044085,GO:…	-	ko:K19402	-	-	-	-	ko00000,ko03036	-	-	-	Cpn60_TCP1
LEUER_T0000076	LOC116969808	7918.ENSLOCP00000003347	2.83e-72	222.0	COG5126@1|root,KOG0028@2759|Eukaryota,38C1B@33154|Opisthokonta,3BB2J@33208|Metazoa,3D0FW@33213|Bilateria,482AE@7711|Chordata,48XNM@7742|Vertebrata,49XMQ@7898|Actinopterygii	33208|Metazoa	T	Centrin 4	CETN2	GO:0000003,GO:0000086,GO:0000109,GO:0000226,GO:0000278,GO:0000715,GO:0003674,GO:0005488,GO:0005509,GO:0005515,GO:0005575,GO:0005622,GO:0005623,GO:0005634,GO:0005654,GO:0005737,GO:0005813,GO:0005814,GO:0005815,GO:0005829,GO:0005856,GO:0005929,GO:0006139,GO:0006259,GO:0006281,GO:0006289,GO:0006294,GO:0006725,GO:0006807,GO:0006950,GO:0006974,GO:0006996,GO:0007010,GO:0007017,GO:0007049,GO:0007098,GO:…	-	ko:K10840,ko:K16465	ko03420,map03420	-	-	-	ko00000,ko00001,ko03036,ko03400	-	-	-	EF-hand_1,EF-hand_5,EF-hand_6,EF-hand_7,EF-hand_8
LEUER_T0000077	LOC116969808	7918.ENSLOCP00000003347	2.83e-72	222.0	COG5126@1|root,KOG0028@2759|Eukaryota,38C1B@33154|Opisthokonta,3BB2J@33208|Metazoa,3D0FW@33213|Bilateria,482AE@7711|Chordata,48XNM@7742|Vertebrata,49XMQ@7898|Actinopterygii	33208|Metazoa	T	Centrin 4	CETN2	GO:0000003,GO:0000086,GO:0000109,GO:0000226,GO:0000278,GO:0000715,GO:0003674,GO:0005488,GO:0005509,GO:0005515,GO:0005575,GO:0005622,GO:0005623,GO:0005634,GO:0005654,GO:0005737,GO:0005813,GO:0005814,GO:0005815,GO:0005829,GO:0005856,GO:0005929,GO:0006139,GO:0006259,GO:0006281,GO:0006289,GO:0006294,GO:0006725,GO:0006807,GO:0006950,GO:0006974,GO:0006996,GO:0007010,GO:0007017,GO:0007049,GO:0007098,GO:…	-	ko:K10840,ko:K16465	ko03420,map03420	-	-	-	ko00000,ko00001,ko03036,ko03400	-	-	-	EF-hand_1,EF-hand_5,EF-hand_6,EF-hand_7,EF-hand_8
LEUER_T0000078	adad1	13616.ENSMODP00000023606	9.83e-224	639.0	KOG2777@1|root,KOG2777@2759|Eukaryota,39R3D@33154|Opisthokonta,3BIA2@33208|Metazoa,3CXDX@33213|Bilateria,481WY@7711|Chordata,48YW2@7742|Vertebrata,3J3UA@40674|Mammalia,4JZ9N@9263|Metatheria	33208|Metazoa	A	Adenosine deaminase domain containing 1 (testis-specific)	ADAD1	GO:0000003,GO:0003006,GO:0003674,GO:0003676,GO:0003723,GO:0005488,GO:0005575,GO:0005622,GO:0005623,GO:0005634,GO:0007276,GO:0007281,GO:0007283,GO:0007286,GO:0008150,GO:0009987,GO:0019953,GO:0022412,GO:0022414,GO:0030154,GO:0032501,GO:0032502,GO:0032504,GO:0043226,GO:0043227,GO:0043229,GO:0043231,GO:0044424,GO:0044464,GO:0044703,GO:0048232,GO:0048468,GO:0048515,GO:0048609,GO:0048856,GO:0048869,GO:…	3.5.4.37	ko:K12968	ko04623,ko05162,ko05164,map04623,map05162,map05164	-	-	-	ko00000,ko00001,ko01000,ko03041	-	-	-	A_deamin,dsrm
LEUER_T0000079	LOC116971598	246437.XP_006147685.1	1.97e-232	655.0	KOG3105@1|root,KOG3105@2759|Eukaryota,38HJW@33154|Opisthokonta,3BCG5@33208|Metazoa,3CXR0@33213|Bilateria,483WR@7711|Chordata,48W5R@7742|Vertebrata,3J7P0@40674|Mammalia,35GB1@314146|Euarchontoglires	33208|Metazoa	BD	positive regulation of canonical Wnt signaling pathway	-	-	-	-	-	-	-	-	-	-	-	-	CENP-B_N,DDE_1,HTH_Tnp_Tc5
LEUER_T0000080	kiaa1109	9597.XP_008967725.1	0.0	7514.0	KOG3596@1|root,KOG3596@2759|Eukaryota,38BJU@33154|Opisthokonta,3BHTG@33208|Metazoa,3CVAI@33213|Bilateria,482CR@7711|Chordata,48W41@7742|Vertebrata,3J5AK@40674|Mammalia,35D9R@314146|Euarchontoglires,4MEK3@9443|Primates,4N4UU@9604|Hominidae	33208|Metazoa	S	Fragile site-associated protein C-terminus	KIAA1109	GO:0000003,GO:0001558,GO:0005575,GO:0005622,GO:0005623,GO:0005634,GO:0006629,GO:0006810,GO:0006897,GO:0007275,GO:0007276,GO:0007283,GO:0008150,GO:0008152,GO:0009888,GO:0009987,GO:0010876,GO:0016020,GO:0016192,GO:0019915,GO:0019953,GO:0022414,GO:0030154,GO:0030856,GO:0032501,GO:0032502,GO:0032504,GO:0033036,GO:0036465,GO:0040008,GO:0043226,GO:0043227,GO:0043229,GO:0043231,GO:0044238,GO:0044424,GO:…	-	-	-	-	-	-	-	-	-	-	FSA_C
LEUER_T0000081	kiaa1109	9597.XP_008967725.1	0.0	7519.0	KOG3596@1|root,KOG3596@2759|Eukaryota,38BJU@33154|Opisthokonta,3BHTG@33208|Metazoa,3CVAI@33213|Bilateria,482CR@7711|Chordata,48W41@7742|Vertebrata,3J5AK@40674|Mammalia,35D9R@314146|Euarchontoglires,4MEK3@9443|Primates,4N4UU@9604|Hominidae	33208|Metazoa	S	Fragile site-associated protein C-terminus	KIAA1109	GO:0000003,GO:0001558,GO:0005575,GO:0005622,GO:0005623,GO:0005634,GO:0006629,GO:0006810,GO:0006897,GO:0007275,GO:0007276,GO:0007283,GO:0008150,GO:0008152,GO:0009888,GO:0009987,GO:0010876,GO:0016020,GO:0016192,GO:0019915,GO:0019953,GO:0022414,GO:0030154,GO:0030856,GO:0032501,GO:0032502,GO:0032504,GO:0033036,GO:0036465,GO:0040008,GO:0043226,GO:0043227,GO:0043229,GO:0043231,GO:0044238,GO:0044424,GO:…	-	-	-	-	-	-	-	-	-	-	FSA_C
LEUER_T0000082	kiaa1109	9597.XP_008967725.1	0.0	7470.0	KOG3596@1|root,KOG3596@2759|Eukaryota,38BJU@33154|Opisthokonta,3BHTG@33208|Metazoa,3CVAI@33213|Bilateria,482CR@7711|Chordata,48W41@7742|Vertebrata,3J5AK@40674|Mammalia,35D9R@314146|Euarchontoglires,4MEK3@9443|Primates,4N4UU@9604|Hominidae	33208|Metazoa	S	Fragile site-associated protein C-terminus	KIAA1109	GO:0000003,GO:0001558,GO:0005575,GO:0005622,GO:0005623,GO:0005634,GO:0006629,GO:0006810,GO:0006897,GO:0007275,GO:0007276,GO:0007283,GO:0008150,GO:0008152,GO:0009888,GO:0009987,GO:0010876,GO:0016020,GO:0016192,GO:0019915,GO:0019953,GO:0022414,GO:0030154,GO:0030856,GO:0032501,GO:0032502,GO:0032504,GO:0033036,GO:0036465,GO:0040008,GO:0043226,GO:0043227,GO:0043229,GO:0043231,GO:0044238,GO:0044424,GO:…	-	-	-	-	-	-	-	-	-	-	FSA_C
LEUER_T0000084	trpc3	60711.ENSCSAP00000000064	0.0	1439.0	KOG3609@1|root,KOG3609@2759|Eukaryota,38BJZ@33154|Opisthokonta,3B9NF@33208|Metazoa,3CRT8@33213|Bilateria,47ZX4@7711|Chordata,496KE@7742|Vertebrata,3JFA9@40674|Mammalia,359EC@314146|Euarchontoglires,4M9HE@9443|Primates,35YXF@314294|Cercopithecoidea	33208|Metazoa	PT	Belongs to the transient receptor (TC 1.A.4) family	TRPC3	GO:0000003,GO:0000041,GO:0001775,GO:0003674,GO:0005215,GO:0005216,GO:0005227,GO:0005261,GO:0005262,GO:0005488,GO:0005575,GO:0005623,GO:0005886,GO:0005887,GO:0006810,GO:0006811,GO:0006812,GO:0006816,GO:0006828,GO:0006873,GO:0006874,GO:0006875,GO:0006950,GO:0007154,GO:0007165,GO:0007204,GO:0007338,GO:0007584,GO:0007596,GO:0007599,GO:0007602,GO:0008150,GO:0008324,GO:0009314,GO:0009416,GO:0009566,GO:…	-	ko:K04966,ko:K04969,ko:K04970	ko04022,ko04360,map04022,map04360	-	-	-	ko00000,ko00001,ko04040	1.A.4.1.2,1.A.4.1.4,1.A.4.1.5	-	-	Ank_2,Ion_trans,TRP_2
LEUER_T0000085	trpc3	60711.ENSCSAP00000000064	0.0	1452.0	KOG3609@1|root,KOG3609@2759|Eukaryota,38BJZ@33154|Opisthokonta,3B9NF@33208|Metazoa,3CRT8@33213|Bilateria,47ZX4@7711|Chordata,496KE@7742|Vertebrata,3JFA9@40674|Mammalia,359EC@314146|Euarchontoglires,4M9HE@9443|Primates,35YXF@314294|Cercopithecoidea	33208|Metazoa	PT	Belongs to the transient receptor (TC 1.A.4) family	TRPC3	GO:0000003,GO:0000041,GO:0001775,GO:0003674,GO:0005215,GO:0005216,GO:0005227,GO:0005261,GO:0005262,GO:0005488,GO:0005575,GO:0005623,GO:0005886,GO:0005887,GO:0006810,GO:0006811,GO:0006812,GO:0006816,GO:0006828,GO:0006873,GO:0006874,GO:0006875,GO:0006950,GO:0007154,GO:0007165,GO:0007204,GO:0007338,GO:0007584,GO:0007596,GO:0007599,GO:0007602,GO:0008150,GO:0008324,GO:0009314,GO:0009416,GO:0009566,GO:…	-	ko:K04966,ko:K04969,ko:K04970	ko04022,ko04360,map04022,map04360	-	-	-	ko00000,ko00001,ko04040	1.A.4.1.2,1.A.4.1.4,1.A.4.1.5	-	-	Ank_2,Ion_trans,TRP_2
LEUER_T0000087	LOC116970537	7918.ENSLOCP00000022095	2.78e-16	70.5	2D0DK@1|root,2SDSY@2759|Eukaryota,3ABI2@33154|Opisthokonta,3BVK7@33208|Metazoa,3DC0J@33213|Bilateria,48GZQ@7711|Chordata,49DUS@7742|Vertebrata,4A4Z9@7898|Actinopterygii	33208|Metazoa	S	subunit 4	OST4	-	-	-	-	-	-	-	-	-	-	-	Ost4
LEUER_T0000088	LOC116970537	7918.ENSLOCP00000022095	2.78e-16	70.5	2D0DK@1|root,2SDSY@2759|Eukaryota,3ABI2@33154|Opisthokonta,3BVK7@33208|Metazoa,3DC0J@33213|Bilateria,48GZQ@7711|Chordata,49DUS@7742|Vertebrata,4A4Z9@7898|Actinopterygii	33208|Metazoa	S	subunit 4	OST4	-	-	-	-	-	-	-	-	-	-	-	Ost4
LEUER_T0000089	bbs7	7897.ENSLACP00000002676	0.0	1209.0	2C3IK@1|root,2QPS5@2759|Eukaryota,38DRJ@33154|Opisthokonta,3BBU2@33208|Metazoa,3CXFH@33213|Bilateria,483XT@7711|Chordata,494FA@7742|Vertebrata	33208|Metazoa	Z	The BBSome complex is thought to function as a coat complex required for sorting of specific membrane proteins to the primary cilia. The BBSome complex is required for ciliogenesis but is dispensable for centriolar satellite function	BBS7	GO:0001085,GO:0001103,GO:0001654,GO:0001750,GO:0001947,GO:0002009,GO:0003007,GO:0003143,GO:0003674,GO:0005488,GO:0005515,GO:0005575,GO:0005622,GO:0005623,GO:0005634,GO:0005737,GO:0005813,GO:0005815,GO:0005829,GO:0005856,GO:0005929,GO:0005930,GO:0006355,GO:0006357,GO:0006810,GO:0006928,GO:0006935,GO:0006996,GO:0007017,GO:0007018,GO:0007154,GO:0007165,GO:0007166,GO:0007224,GO:0007275,GO:0007368,GO:…	-	ko:K16749	-	-	-	-	ko00000,ko03036	-	-	-	-
LEUER_T0000090	bbs7	7897.ENSLACP00000002676	0.0	1025.0	2C3IK@1|root,2QPS5@2759|Eukaryota,38DRJ@33154|Opisthokonta,3BBU2@33208|Metazoa,3CXFH@33213|Bilateria,483XT@7711|Chordata,494FA@7742|Vertebrata	33208|Metazoa	Z	The BBSome complex is thought to function as a coat complex required for sorting of specific membrane proteins to the primary cilia. The BBSome complex is required for ciliogenesis but is dispensable for centriolar satellite function	BBS7	GO:0001085,GO:0001103,GO:0001654,GO:0001750,GO:0001947,GO:0002009,GO:0003007,GO:0003143,GO:0003674,GO:0005488,GO:0005515,GO:0005575,GO:0005622,GO:0005623,GO:0005634,GO:0005737,GO:0005813,GO:0005815,GO:0005829,GO:0005856,GO:0005929,GO:0005930,GO:0006355,GO:0006357,GO:0006810,GO:0006928,GO:0006935,GO:0006996,GO:0007017,GO:0007018,GO:0007154,GO:0007165,GO:0007166,GO:0007224,GO:0007275,GO:0007368,GO:…	-	ko:K16749	-	-	-	-	ko00000,ko03036	-	-	-	-
LEUER_T0000091	ccna2	7918.ENSLOCP00000003518	1.47e-155	454.0	COG5024@1|root,KOG0654@2759|Eukaryota,38E7Y@33154|Opisthokonta,3BCMY@33208|Metazoa,3CXZH@33213|Bilateria,484RJ@7711|Chordata,494N8@7742|Vertebrata,49QM0@7898|Actinopterygii	33208|Metazoa	D	Belongs to the cyclin family	CCNA2	GO:0000003,GO:0000086,GO:0000278,GO:0000307,GO:0001939,GO:0001940,GO:0003674,GO:0005488,GO:0005515,GO:0005575,GO:0005622,GO:0005623,GO:0005634,GO:0005654,GO:0005737,GO:0005829,GO:0006325,GO:0006355,GO:0006464,GO:0006468,GO:0006508,GO:0006793,GO:0006796,GO:0006807,GO:0006996,GO:0007049,GO:0007154,GO:0007165,GO:0007264,GO:0007265,GO:0008150,GO:0008152,GO:0008284,GO:0009889,GO:0009891,GO:0009893,GO:…	-	ko:K06627	ko04110,ko04152,ko04218,ko04914,ko05161,ko05165,ko05169,ko05203,map04110,map04152,map04218,map04914,map05161,map05165,map05169,map05203	M00693	-	-	ko00000,ko00001,ko00002,ko03032,ko03036	-	-	-	Cyclin_C,Cyclin_N,Cyclin_N2
LEUER_T0000092	exosc9	10029.XP_007634888.1	3.18e-211	595.0	COG2123@1|root,KOG1614@2759|Eukaryota,38B7Z@33154|Opisthokonta,3BBNH@33208|Metazoa,3CWFF@33213|Bilateria,48AP7@7711|Chordata,48V4W@7742|Vertebrata,3JC4Y@40674|Mammalia,35NMS@314146|Euarchontoglires,4PTS5@9989|Rodentia	33208|Metazoa	J	U1 snRNA 3'-end processing	EXOSC9	GO:0000175,GO:0000176,GO:0000177,GO:0000178,GO:0000228,GO:0000288,GO:0000291,GO:0000459,GO:0000460,GO:0000466,GO:0000467,GO:0000469,GO:0000956,GO:0001085,GO:0001102,GO:0001558,GO:0002376,GO:0003674,GO:0003676,GO:0003723,GO:0003824,GO:0004518,GO:0004527,GO:0004532,GO:0004540,GO:0005488,GO:0005515,GO:0005575,GO:0005622,GO:0005623,GO:0005634,GO:0005654,GO:0005694,GO:0005730,GO:0005737,GO:0005829,GO:…	-	ko:K03678,ko:K12586	ko03018,map03018	M00391	-	-	ko00000,ko00001,ko00002,ko03019	-	-	-	RNase_PH,RNase_PH_C
LEUER_T0000093	exosc9	10029.XP_007634888.1	4.12e-209	590.0	COG2123@1|root,KOG1614@2759|Eukaryota,38B7Z@33154|Opisthokonta,3BBNH@33208|Metazoa,3CWFF@33213|Bilateria,48AP7@7711|Chordata,48V4W@7742|Vertebrata,3JC4Y@40674|Mammalia,35NMS@314146|Euarchontoglires,4PTS5@9989|Rodentia	33208|Metazoa	J	U1 snRNA 3'-end processing	EXOSC9	GO:0000175,GO:0000176,GO:0000177,GO:0000178,GO:0000228,GO:0000288,GO:0000291,GO:0000459,GO:0000460,GO:0000466,GO:0000467,GO:0000469,GO:0000956,GO:0001085,GO:0001102,GO:0001558,GO:0002376,GO:0003674,GO:0003676,GO:0003723,GO:0003824,GO:0004518,GO:0004527,GO:0004532,GO:0004540,GO:0005488,GO:0005515,GO:0005575,GO:0005622,GO:0005623,GO:0005634,GO:0005654,GO:0005694,GO:0005730,GO:0005737,GO:0005829,GO:…	-	ko:K03678,ko:K12586	ko03018,map03018	M00391	-	-	ko00000,ko00001,ko00002,ko03019	-	-	-	RNase_PH,RNase_PH_C
LEUER_T0000094	exosc9	10029.XP_007634888.1	1.41e-211	595.0	COG2123@1|root,KOG1614@2759|Eukaryota,38B7Z@33154|Opisthokonta,3BBNH@33208|Metazoa,3CWFF@33213|Bilateria,48AP7@7711|Chordata,48V4W@7742|Vertebrata,3JC4Y@40674|Mammalia,35NMS@314146|Euarchontoglires,4PTS5@9989|Rodentia	33208|Metazoa	J	U1 snRNA 3'-end processing	EXOSC9	GO:0000175,GO:0000176,GO:0000177,GO:0000178,GO:0000228,GO:0000288,GO:0000291,GO:0000459,GO:0000460,GO:0000466,GO:0000467,GO:0000469,GO:0000956,GO:0001085,GO:0001102,GO:0001558,GO:0002376,GO:0003674,GO:0003676,GO:0003723,GO:0003824,GO:0004518,GO:0004527,GO:0004532,GO:0004540,GO:0005488,GO:0005515,GO:0005575,GO:0005622,GO:0005623,GO:0005634,GO:0005654,GO:0005694,GO:0005730,GO:0005737,GO:0005829,GO:…	-	ko:K03678,ko:K12586	ko03018,map03018	M00391	-	-	ko00000,ko00001,ko00002,ko03019	-	-	-	RNase_PH,RNase_PH_C
LEUER_T0000095	anxa5	89462.XP_006043125.1	1.96e-137	401.0	KOG0819@1|root,KOG0819@2759|Eukaryota,39TR2@33154|Opisthokonta,3BIK0@33208|Metazoa,3CXHW@33213|Bilateria,486SS@7711|Chordata,490GM@7742|Vertebrata,3JA4S@40674|Mammalia,4J3Q0@91561|Cetartiodactyla	33208|Metazoa	U	annexin A5	ANXA5	GO:0002576,GO:0002791,GO:0002792,GO:0003674,GO:0003824,GO:0004857,GO:0004859,GO:0005102,GO:0005215,GO:0005216,GO:0005261,GO:0005262,GO:0005388,GO:0005488,GO:0005515,GO:0005539,GO:0005543,GO:0005544,GO:0005575,GO:0005576,GO:0005615,GO:0005622,GO:0005623,GO:0005634,GO:0005737,GO:0005783,GO:0005829,GO:0005886,GO:0005911,GO:0006810,GO:0006811,GO:0006812,GO:0006816,GO:0006887,GO:0007154,GO:0007165,GO:…	-	ko:K16646	-	-	-	-	ko00000,ko00536,ko04147	1.A.31.1.7	-	-	Annexin
LEUER_T0000096	LOC116970804	181119.XP_005531801.1	9.61e-25	96.7	2E063@1|root,2S7MM@2759|Eukaryota,3AN5U@33154|Opisthokonta,3C1H4@33208|Metazoa,3D9P3@33213|Bilateria,48FJD@7711|Chordata,49CIQ@7742|Vertebrata,4GVDA@8782|Aves	33208|Metazoa	O	Belongs to the intercrine alpha (chemokine CxC) family	CXCL1	GO:0001664,GO:0001775,GO:0001906,GO:0001910,GO:0001912,GO:0001975,GO:0002028,GO:0002237,GO:0002252,GO:0002263,GO:0002274,GO:0002275,GO:0002283,GO:0002366,GO:0002376,GO:0002443,GO:0002444,GO:0002446,GO:0002526,GO:0002682,GO:0002684,GO:0002685,GO:0002687,GO:0002688,GO:0002690,GO:0002697,GO:0002699,GO:0002703,GO:0002705,GO:0002831,GO:0002833,GO:0002886,GO:0002888,GO:0003674,GO:0005102,GO:0005125,GO:…	-	ko:K05505,ko:K10030	ko04060,ko04062,ko04064,ko04072,ko04218,ko04620,ko04621,ko04622,ko04657,ko04668,ko04932,ko04933,ko05120,ko05131,ko05132,ko05133,ko05134,ko05142,ko05144,ko05146,ko05160,ko05161,ko05164,ko05167,ko05200,ko05202,ko05219,ko05323,map04060,map04062,map04064,map04072,map04218,map04620,map04621,map04622,map04657,map04668,map04932,map04933,map05120,map05131,map05132,map05133,map05134,map05142,map05144,map0…	-	-	-	ko00000,ko00001,ko00536,ko04052	-	-	-	IL8
LEUER_T0000097	LOC116970811	181119.XP_005531801.1	9.61e-25	96.7	2E063@1|root,2S7MM@2759|Eukaryota,3AN5U@33154|Opisthokonta,3C1H4@33208|Metazoa,3D9P3@33213|Bilateria,48FJD@7711|Chordata,49CIQ@7742|Vertebrata,4GVDA@8782|Aves	33208|Metazoa	O	Belongs to the intercrine alpha (chemokine CxC) family	CXCL1	GO:0001664,GO:0001775,GO:0001906,GO:0001910,GO:0001912,GO:0001975,GO:0002028,GO:0002237,GO:0002252,GO:0002263,GO:0002274,GO:0002275,GO:0002283,GO:0002366,GO:0002376,GO:0002443,GO:0002444,GO:0002446,GO:0002526,GO:0002682,GO:0002684,GO:0002685,GO:0002687,GO:0002688,GO:0002690,GO:0002697,GO:0002699,GO:0002703,GO:0002705,GO:0002831,GO:0002833,GO:0002886,GO:0002888,GO:0003674,GO:0005102,GO:0005125,GO:…	-	ko:K05505,ko:K10030	ko04060,ko04062,ko04064,ko04072,ko04218,ko04620,ko04621,ko04622,ko04657,ko04668,ko04932,ko04933,ko05120,ko05131,ko05132,ko05133,ko05134,ko05142,ko05144,ko05146,ko05160,ko05161,ko05164,ko05167,ko05200,ko05202,ko05219,ko05323,map04060,map04062,map04064,map04072,map04218,map04620,map04621,map04622,map04657,map04668,map04932,map04933,map05120,map05131,map05132,map05133,map05134,map05142,map05144,map0…	-	-	-	ko00000,ko00001,ko00536,ko04052	-	-	-	IL8
LEUER_T0000098	LOC116970757	181119.XP_005531801.1	9.61e-25	96.7	2E063@1|root,2S7MM@2759|Eukaryota,3AN5U@33154|Opisthokonta,3C1H4@33208|Metazoa,3D9P3@33213|Bilateria,48FJD@7711|Chordata,49CIQ@7742|Vertebrata,4GVDA@8782|Aves	33208|Metazoa	O	Belongs to the intercrine alpha (chemokine CxC) family	CXCL1	GO:0001664,GO:0001775,GO:0001906,GO:0001910,GO:0001912,GO:0001975,GO:0002028,GO:0002237,GO:0002252,GO:0002263,GO:0002274,GO:0002275,GO:0002283,GO:0002366,GO:0002376,GO:0002443,GO:0002444,GO:0002446,GO:0002526,GO:0002682,GO:0002684,GO:0002685,GO:0002687,GO:0002688,GO:0002690,GO:0002697,GO:0002699,GO:0002703,GO:0002705,GO:0002831,GO:0002833,GO:0002886,GO:0002888,GO:0003674,GO:0005102,GO:0005125,GO:…	-	ko:K05505,ko:K10030	ko04060,ko04062,ko04064,ko04072,ko04218,ko04620,ko04621,ko04622,ko04657,ko04668,ko04932,ko04933,ko05120,ko05131,ko05132,ko05133,ko05134,ko05142,ko05144,ko05146,ko05160,ko05161,ko05164,ko05167,ko05200,ko05202,ko05219,ko05323,map04060,map04062,map04064,map04072,map04218,map04620,map04621,map04622,map04657,map04668,map04932,map04933,map05120,map05131,map05132,map05133,map05134,map05142,map05144,map0…	-	-	-	ko00000,ko00001,ko00536,ko04052	-	-	-	IL8
LEUER_T0000099	LOC116970767	181119.XP_005531801.1	9.61e-25	96.7	2E063@1|root,2S7MM@2759|Eukaryota,3AN5U@33154|Opisthokonta,3C1H4@33208|Metazoa,3D9P3@33213|Bilateria,48FJD@7711|Chordata,49CIQ@7742|Vertebrata,4GVDA@8782|Aves	33208|Metazoa	O	Belongs to the intercrine alpha (chemokine CxC) family	CXCL1	GO:0001664,GO:0001775,GO:0001906,GO:0001910,GO:0001912,GO:0001975,GO:0002028,GO:0002237,GO:0002252,GO:0002263,GO:0002274,GO:0002275,GO:0002283,GO:0002366,GO:0002376,GO:0002443,GO:0002444,GO:0002446,GO:0002526,GO:0002682,GO:0002684,GO:0002685,GO:0002687,GO:0002688,GO:0002690,GO:0002697,GO:0002699,GO:0002703,GO:0002705,GO:0002831,GO:0002833,GO:0002886,GO:0002888,GO:0003674,GO:0005102,GO:0005125,GO:…	-	ko:K05505,ko:K10030	ko04060,ko04062,ko04064,ko04072,ko04218,ko04620,ko04621,ko04622,ko04657,ko04668,ko04932,ko04933,ko05120,ko05131,ko05132,ko05133,ko05134,ko05142,ko05144,ko05146,ko05160,ko05161,ko05164,ko05167,ko05200,ko05202,ko05219,ko05323,map04060,map04062,map04064,map04072,map04218,map04620,map04621,map04622,map04657,map04668,map04932,map04933,map05120,map05131,map05132,map05133,map05134,map05142,map05144,map0…	-	-	-	ko00000,ko00001,ko00536,ko04052	-	-	-	IL8
LEUER_T0000100	LOC116970830	13735.ENSPSIP00000010034	7.56e-27	101.0	2E063@1|root,2S7MM@2759|Eukaryota,3A59A@33154|Opisthokonta,3C0NW@33208|Metazoa,3D9V3@33213|Bilateria,48GC1@7711|Chordata,49D4M@7742|Vertebrata,4CI78@8459|Testudines	33208|Metazoa	O	Belongs to the intercrine alpha (chemokine CxC) family	CXCL8	GO:0001525,GO:0001568,GO:0001664,GO:0001775,GO:0001906,GO:0001944,GO:0002232,GO:0002237,GO:0002269,GO:0002274,GO:0002376,GO:0002520,GO:0002523,GO:0002548,GO:0002682,GO:0002684,GO:0002685,GO:0002687,GO:0002688,GO:0002690,GO:0003674,GO:0005102,GO:0005125,GO:0005126,GO:0005153,GO:0005488,GO:0005515,GO:0005575,GO:0005576,GO:0005615,GO:0006810,GO:0006897,GO:0006898,GO:0006928,GO:0006935,GO:0006950,GO:…	-	ko:K10030	ko04060,ko04062,ko04064,ko04072,ko04218,ko04620,ko04621,ko04622,ko04657,ko04932,ko04933,ko05120,ko05131,ko05132,ko05133,ko05134,ko05142,ko05144,ko05146,ko05160,ko05161,ko05164,ko05167,ko05200,ko05202,ko05219,ko05323,map04060,map04062,map04064,map04072,map04218,map04620,map04621,map04622,map04657,map04932,map04933,map05120,map05131,map05132,map05133,map05134,map05142,map05144,map05146,map05160,map…	-	-	-	ko00000,ko00001,ko00536,ko04052	-	-	-	IL8
LEUER_T0000101	LOC116970773	13735.ENSPSIP00000010034	7.56e-27	101.0	2E063@1|root,2S7MM@2759|Eukaryota,3A59A@33154|Opisthokonta,3C0NW@33208|Metazoa,3D9V3@33213|Bilateria,48GC1@7711|Chordata,49D4M@7742|Vertebrata,4CI78@8459|Testudines	33208|Metazoa	O	Belongs to the intercrine alpha (chemokine CxC) family	CXCL8	GO:0001525,GO:0001568,GO:0001664,GO:0001775,GO:0001906,GO:0001944,GO:0002232,GO:0002237,GO:0002269,GO:0002274,GO:0002376,GO:0002520,GO:0002523,GO:0002548,GO:0002682,GO:0002684,GO:0002685,GO:0002687,GO:0002688,GO:0002690,GO:0003674,GO:0005102,GO:0005125,GO:0005126,GO:0005153,GO:0005488,GO:0005515,GO:0005575,GO:0005576,GO:0005615,GO:0006810,GO:0006897,GO:0006898,GO:0006928,GO:0006935,GO:0006950,GO:…	-	ko:K10030	ko04060,ko04062,ko04064,ko04072,ko04218,ko04620,ko04621,ko04622,ko04657,ko04932,ko04933,ko05120,ko05131,ko05132,ko05133,ko05134,ko05142,ko05144,ko05146,ko05160,ko05161,ko05164,ko05167,ko05200,ko05202,ko05219,ko05323,map04060,map04062,map04064,map04072,map04218,map04620,map04621,map04622,map04657,map04932,map04933,map05120,map05131,map05132,map05133,map05134,map05142,map05144,map05146,map05160,map…	-	-	-	ko00000,ko00001,ko00536,ko04052	-	-	-	IL8
LEUER_T0000105	LOC116970687	8364.ENSXETP00000039214	1.35e-136	414.0	KOG4302@1|root,KOG4302@2759|Eukaryota,38H2K@33154|Opisthokonta,3BKEZ@33208|Metazoa,3CRHH@33213|Bilateria,48DBD@7711|Chordata,497XF@7742|Vertebrata	33208|Metazoa	DZ	Microtubule associated protein (MAP65/ASE1 family)	-	GO:0000226,GO:0000278,GO:0000281,GO:0000910,GO:0000916,GO:0005575,GO:0005622,GO:0005623,GO:0005737,GO:0005819,GO:0005856,GO:0006996,GO:0007010,GO:0007017,GO:0007049,GO:0007051,GO:0007052,GO:0008150,GO:0009987,GO:0015630,GO:0016043,GO:0022402,GO:0030029,GO:0030036,GO:0030865,GO:0030866,GO:0031032,GO:0032506,GO:0036213,GO:0043226,GO:0043228,GO:0043229,GO:0043232,GO:0044422,GO:0044424,GO:0044430,GO:…	-	ko:K16732	-	-	-	-	ko00000,ko03036,ko04812	-	-	-	MAP65_ASE1
LEUER_T0000102	LOC116970687	8364.ENSXETP00000039214	1.1e-146	443.0	KOG4302@1|root,KOG4302@2759|Eukaryota,38H2K@33154|Opisthokonta,3BKEZ@33208|Metazoa,3CRHH@33213|Bilateria,48DBD@7711|Chordata,497XF@7742|Vertebrata	33208|Metazoa	DZ	Microtubule associated protein (MAP65/ASE1 family)	-	GO:0000226,GO:0000278,GO:0000281,GO:0000910,GO:0000916,GO:0005575,GO:0005622,GO:0005623,GO:0005737,GO:0005819,GO:0005856,GO:0006996,GO:0007010,GO:0007017,GO:0007049,GO:0007051,GO:0007052,GO:0008150,GO:0009987,GO:0015630,GO:0016043,GO:0022402,GO:0030029,GO:0030036,GO:0030865,GO:0030866,GO:0031032,GO:0032506,GO:0036213,GO:0043226,GO:0043228,GO:0043229,GO:0043232,GO:0044422,GO:0044424,GO:0044430,GO:…	-	ko:K16732	-	-	-	-	ko00000,ko03036,ko04812	-	-	-	MAP65_ASE1
LEUER_T0000103	LOC116970687	8364.ENSXETP00000039214	1.91e-144	437.0	KOG4302@1|root,KOG4302@2759|Eukaryota,38H2K@33154|Opisthokonta,3BKEZ@33208|Metazoa,3CRHH@33213|Bilateria,48DBD@7711|Chordata,497XF@7742|Vertebrata	33208|Metazoa	DZ	Microtubule associated protein (MAP65/ASE1 family)	-	GO:0000226,GO:0000278,GO:0000281,GO:0000910,GO:0000916,GO:0005575,GO:0005622,GO:0005623,GO:0005737,GO:0005819,GO:0005856,GO:0006996,GO:0007010,GO:0007017,GO:0007049,GO:0007051,GO:0007052,GO:0008150,GO:0009987,GO:0015630,GO:0016043,GO:0022402,GO:0030029,GO:0030036,GO:0030865,GO:0030866,GO:0031032,GO:0032506,GO:0036213,GO:0043226,GO:0043228,GO:0043229,GO:0043232,GO:0044422,GO:0044424,GO:0044430,GO:…	-	ko:K16732	-	-	-	-	ko00000,ko03036,ko04812	-	-	-	MAP65_ASE1
LEUER_T0000104	LOC116970687	8364.ENSXETP00000039214	8.15e-142	429.0	KOG4302@1|root,KOG4302@2759|Eukaryota,38H2K@33154|Opisthokonta,3BKEZ@33208|Metazoa,3CRHH@33213|Bilateria,48DBD@7711|Chordata,497XF@7742|Vertebrata	33208|Metazoa	DZ	Microtubule associated protein (MAP65/ASE1 family)	-	GO:0000226,GO:0000278,GO:0000281,GO:0000910,GO:0000916,GO:0005575,GO:0005622,GO:0005623,GO:0005737,GO:0005819,GO:0005856,GO:0006996,GO:0007010,GO:0007017,GO:0007049,GO:0007051,GO:0007052,GO:0008150,GO:0009987,GO:0015630,GO:0016043,GO:0022402,GO:0030029,GO:0030036,GO:0030865,GO:0030866,GO:0031032,GO:0032506,GO:0036213,GO:0043226,GO:0043228,GO:0043229,GO:0043232,GO:0044422,GO:0044424,GO:0044430,GO:…	-	ko:K16732	-	-	-	-	ko00000,ko03036,ko04812	-	-	-	MAP65_ASE1
LEUER_T0000107	LOC116970674	7897.ENSLACP00000003336	1.9e-294	829.0	COG0659@1|root,KOG0236@2759|Eukaryota,38EAT@33154|Opisthokonta,3BAAN@33208|Metazoa,3CUG2@33213|Bilateria,488RB@7711|Chordata,48YNF@7742|Vertebrata	33208|Metazoa	P	oxalate transmembrane transporter activity	SLC26A1	GO:0003674,GO:0005215,GO:0005216,GO:0005253,GO:0005254,GO:0005310,GO:0005342,GO:0005452,GO:0005575,GO:0005623,GO:0005886,GO:0005887,GO:0006082,GO:0006139,GO:0006163,GO:0006164,GO:0006725,GO:0006753,GO:0006790,GO:0006793,GO:0006796,GO:0006807,GO:0006810,GO:0006811,GO:0006812,GO:0006816,GO:0006820,GO:0006821,GO:0006835,GO:0006855,GO:0006873,GO:0006885,GO:0008028,GO:0008150,GO:0008152,GO:0008272,GO:…	-	ko:K14453,ko:K14700,ko:K14701,ko:K14702,ko:K14703	ko04918,map04918	-	-	-	ko00000,ko00001,ko02000,ko04147	2.A.53.2,2.A.53.2.1,2.A.53.2.2,2.A.53.2.4,2.A.53.2.5,2.A.53.2.9	-	-	STAS,Sulfate_transp
LEUER_T0000108	LOC116970725	9031.ENSGALP00000024761	8.74e-269	752.0	COG3664@1|root,2QRES@2759|Eukaryota,38DZY@33154|Opisthokonta,3BH7F@33208|Metazoa,3CWYT@33213|Bilateria,48A82@7711|Chordata,48XKD@7742|Vertebrata,4GS6C@8782|Aves	33208|Metazoa	G	Glycosyl hydrolases family 39	IDUA	GO:0000323,GO:0000902,GO:0001501,GO:0003674,GO:0003824,GO:0003940,GO:0004553,GO:0005102,GO:0005488,GO:0005515,GO:0005575,GO:0005622,GO:0005623,GO:0005737,GO:0005764,GO:0005773,GO:0005775,GO:0005975,GO:0005984,GO:0006022,GO:0006026,GO:0006027,GO:0006029,GO:0006082,GO:0006790,GO:0006807,GO:0006996,GO:0007033,GO:0007040,GO:0007275,GO:0008150,GO:0008152,GO:0009056,GO:0009057,GO:0009100,GO:0009311,GO:…	3.2.1.76	ko:K01217	ko00531,ko01100,ko04142,map00531,map01100,map04142	M00076,M00078	R07813,R07822	-	ko00000,ko00001,ko00002,ko01000	-	-	-	Glyco_hydro_39
LEUER_T0000110	gtf2e2	8932.XP_005502568.1	9.55e-154	437.0	COG5174@1|root,KOG3095@2759|Eukaryota,38CER@33154|Opisthokonta,3BJGW@33208|Metazoa,3CRKG@33213|Bilateria,489QJ@7711|Chordata,48VZE@7742|Vertebrata,4GJIE@8782|Aves	33208|Metazoa	K	Recruits TFIIH to the initiation complex and stimulates the RNA polymerase II C-terminal domain kinase and DNA-dependent ATPase activities of TFIIH. Both TFIIH and TFIIE are required for promoter clearance by RNA polymerase	GTF2E2	GO:0000428,GO:0000988,GO:0000989,GO:0001076,GO:0003674,GO:0005575,GO:0005622,GO:0005623,GO:0005634,GO:0005654,GO:0005667,GO:0005669,GO:0005673,GO:0005737,GO:0005829,GO:0006139,GO:0006351,GO:0006352,GO:0006355,GO:0006357,GO:0006366,GO:0006367,GO:0006725,GO:0006807,GO:0008150,GO:0008152,GO:0009058,GO:0009059,GO:0009301,GO:0009889,GO:0009891,GO:0009893,GO:0009987,GO:0010467,GO:0010468,GO:0010556,GO:…	-	ko:K03137	ko03022,ko05169,ko05203,map03022,map05169,map05203	-	-	-	ko00000,ko00001,ko03021	-	-	-	TFIIE_beta
LEUER_T0000111	dctn6	181119.XP_005532222.1	2.82e-113	327.0	KOG4042@1|root,KOG4042@2759|Eukaryota,38NSB@33154|Opisthokonta,3BHX9@33208|Metazoa,3CTTP@33213|Bilateria,480IV@7711|Chordata,48Z76@7742|Vertebrata,4GTD5@8782|Aves	33208|Metazoa	UZ	Dynactin subunit 6	DCTN6	GO:0000226,GO:0000278,GO:0002376,GO:0002478,GO:0002495,GO:0002504,GO:0003674,GO:0003824,GO:0005488,GO:0005575,GO:0005622,GO:0005623,GO:0005737,GO:0005739,GO:0005813,GO:0005815,GO:0005829,GO:0005856,GO:0005869,GO:0005875,GO:0006629,GO:0006810,GO:0006888,GO:0006928,GO:0006996,GO:0007005,GO:0007010,GO:0007017,GO:0007018,GO:0007049,GO:0007051,GO:0007052,GO:0008150,GO:0008152,GO:0008610,GO:0009058,GO:…	-	ko:K10428	ko04962,map04962	-	-	-	ko00000,ko00001,ko03036,ko04812	-	-	-	Hexapep
LEUER_T0000112	LOC116970802	9978.XP_004596305.1	2.22e-18	82.8	2ANSX@1|root,2RZF4@2759|Eukaryota,39WZP@33154|Opisthokonta,3BNFR@33208|Metazoa,3D4EW@33213|Bilateria,48CUG@7711|Chordata,4984G@7742|Vertebrata,3J2SC@40674|Mammalia,35JRW@314146|Euarchontoglires	33208|Metazoa	S	IgA binding	IGJ	GO:0002250,GO:0002376,GO:0003008,GO:0003014,GO:0003094,GO:0003674,GO:0003823,GO:0005488,GO:0005515,GO:0005575,GO:0005576,GO:0005615,GO:0006810,GO:0006897,GO:0006898,GO:0006928,GO:0006950,GO:0006952,GO:0006955,GO:0006959,GO:0008150,GO:0009605,GO:0009607,GO:0009617,GO:0009893,GO:0009987,GO:0016192,GO:0016477,GO:0019222,GO:0019730,GO:0019731,GO:0019814,GO:0019862,GO:0019865,GO:0030674,GO:0031334,GO:…	-	-	-	-	-	-	-	-	-	-	Ig_J_chain
LEUER_T0000113	LOC116970651	9031.ENSGALP00000018817	2.32e-15	72.8	2ANSX@1|root,2RZF4@2759|Eukaryota,39WZP@33154|Opisthokonta,3BNFR@33208|Metazoa,3D4EW@33213|Bilateria,48CUG@7711|Chordata,4984G@7742|Vertebrata,4GUVT@8782|Aves	33208|Metazoa	S	immunoglobulin J	IGJ	GO:0002250,GO:0002376,GO:0003008,GO:0003014,GO:0003094,GO:0003674,GO:0003823,GO:0005488,GO:0005515,GO:0005575,GO:0005576,GO:0005615,GO:0006810,GO:0006897,GO:0006898,GO:0006928,GO:0006950,GO:0006952,GO:0006955,GO:0006959,GO:0008150,GO:0009605,GO:0009607,GO:0009617,GO:0009893,GO:0009987,GO:0016192,GO:0016477,GO:0019222,GO:0019730,GO:0019731,GO:0019814,GO:0019862,GO:0019865,GO:0030674,GO:0031334,GO:…	-	-	-	-	-	-	-	-	-	-	Ig_J_chain
LEUER_T0000115	LOC116970800	9031.ENSGALP00000018817	9.91e-19	82.8	2ANSX@1|root,2RZF4@2759|Eukaryota,39WZP@33154|Opisthokonta,3BNFR@33208|Metazoa,3D4EW@33213|Bilateria,48CUG@7711|Chordata,4984G@7742|Vertebrata,4GUVT@8782|Aves	33208|Metazoa	S	immunoglobulin J	IGJ	GO:0002250,GO:0002376,GO:0003008,GO:0003014,GO:0003094,GO:0003674,GO:0003823,GO:0005488,GO:0005515,GO:0005575,GO:0005576,GO:0005615,GO:0006810,GO:0006897,GO:0006898,GO:0006928,GO:0006950,GO:0006952,GO:0006955,GO:0006959,GO:0008150,GO:0009605,GO:0009607,GO:0009617,GO:0009893,GO:0009987,GO:0016192,GO:0016477,GO:0019222,GO:0019730,GO:0019731,GO:0019814,GO:0019862,GO:0019865,GO:0030674,GO:0031334,GO:…	-	-	-	-	-	-	-	-	-	-	Ig_J_chain
LEUER_T0000114	LOC116970651	9031.ENSGALP00000018817	9.91e-19	82.8	2ANSX@1|root,2RZF4@2759|Eukaryota,39WZP@33154|Opisthokonta,3BNFR@33208|Metazoa,3D4EW@33213|Bilateria,48CUG@7711|Chordata,4984G@7742|Vertebrata,4GUVT@8782|Aves	33208|Metazoa	S	immunoglobulin J	IGJ	GO:0002250,GO:0002376,GO:0003008,GO:0003014,GO:0003094,GO:0003674,GO:0003823,GO:0005488,GO:0005515,GO:0005575,GO:0005576,GO:0005615,GO:0006810,GO:0006897,GO:0006898,GO:0006928,GO:0006950,GO:0006952,GO:0006955,GO:0006959,GO:0008150,GO:0009605,GO:0009607,GO:0009617,GO:0009893,GO:0009987,GO:0016192,GO:0016477,GO:0019222,GO:0019730,GO:0019731,GO:0019814,GO:0019862,GO:0019865,GO:0030674,GO:0031334,GO:…	-	-	-	-	-	-	-	-	-	-	Ig_J_chain
LEUER_T0000118	fhdc1	128390.XP_009473009.1	2.03e-124	414.0	KOG1922@1|root,KOG1922@2759|Eukaryota,38C7D@33154|Opisthokonta,3BDNK@33208|Metazoa,3CX9J@33213|Bilateria,484E3@7711|Chordata,48XDI@7742|Vertebrata,4GI45@8782|Aves	33208|Metazoa	TZ	FH2 domain containing 1	FHDC1	GO:0001763,GO:0002009,GO:0003674,GO:0003779,GO:0005488,GO:0005515,GO:0007275,GO:0007424,GO:0008092,GO:0008150,GO:0009653,GO:0009888,GO:0032501,GO:0032502,GO:0035146,GO:0035147,GO:0035239,GO:0035295,GO:0048729,GO:0048731,GO:0048754,GO:0048856,GO:0060429,GO:0060446,GO:0060541,GO:0060562,GO:0061138	-	-	-	-	-	-	-	-	-	-	Drf_FH3,FH2
LEUER_T0000117	fhdc1	7897.ENSLACP00000006053	1.46e-219	671.0	KOG1922@1|root,KOG1922@2759|Eukaryota,38C7D@33154|Opisthokonta,3BDNK@33208|Metazoa,3CX9J@33213|Bilateria,484E3@7711|Chordata,48XDI@7742|Vertebrata	33208|Metazoa	TZ	FH2 domain containing 1	FHDC1	GO:0001763,GO:0002009,GO:0003674,GO:0003779,GO:0005488,GO:0005515,GO:0007275,GO:0007424,GO:0008092,GO:0008150,GO:0009653,GO:0009888,GO:0032501,GO:0032502,GO:0035146,GO:0035147,GO:0035239,GO:0035295,GO:0048729,GO:0048731,GO:0048754,GO:0048856,GO:0060429,GO:0060446,GO:0060541,GO:0060562,GO:0061138	-	-	-	-	-	-	-	-	-	-	Drf_FH3,FH2
LEUER_T0000116	fhdc1	7897.ENSLACP00000006053	1.46e-219	671.0	KOG1922@1|root,KOG1922@2759|Eukaryota,38C7D@33154|Opisthokonta,3BDNK@33208|Metazoa,3CX9J@33213|Bilateria,484E3@7711|Chordata,48XDI@7742|Vertebrata	33208|Metazoa	TZ	FH2 domain containing 1	FHDC1	GO:0001763,GO:0002009,GO:0003674,GO:0003779,GO:0005488,GO:0005515,GO:0007275,GO:0007424,GO:0008092,GO:0008150,GO:0009653,GO:0009888,GO:0032501,GO:0032502,GO:0035146,GO:0035147,GO:0035239,GO:0035295,GO:0048729,GO:0048731,GO:0048754,GO:0048856,GO:0060429,GO:0060446,GO:0060541,GO:0060562,GO:0061138	-	-	-	-	-	-	-	-	-	-	Drf_FH3,FH2
LEUER_T0000121	arfip1	7918.ENSLOCP00000010374	1.51e-163	470.0	KOG3876@1|root,KOG3876@2759|Eukaryota,38FVB@33154|Opisthokonta,3B9RS@33208|Metazoa,3CSSE@33213|Bilateria,485QS@7711|Chordata,48XD6@7742|Vertebrata,49RCV@7898|Actinopterygii	33208|Metazoa	T	ADP-ribosylation factor interacting protein 1 (arfaptin 1)	ARFIP1	GO:0000139,GO:0002791,GO:0003674,GO:0005488,GO:0005515,GO:0005543,GO:0005575,GO:0005622,GO:0005623,GO:0005737,GO:0005794,GO:0005802,GO:0005829,GO:0006810,GO:0006886,GO:0007610,GO:0008064,GO:0008092,GO:0008104,GO:0008150,GO:0008289,GO:0008582,GO:0009636,GO:0009987,GO:0010033,GO:0012505,GO:0015031,GO:0015833,GO:0016020,GO:0016043,GO:0030534,GO:0030832,GO:0030833,GO:0031090,GO:0031984,GO:0032271,GO:…	-	ko:K20314	-	-	-	-	ko00000,ko04131	-	-	-	Arfaptin
LEUER_T0000122	arfip1	7918.ENSLOCP00000010374	4.18e-177	504.0	KOG3876@1|root,KOG3876@2759|Eukaryota,38FVB@33154|Opisthokonta,3B9RS@33208|Metazoa,3CSSE@33213|Bilateria,485QS@7711|Chordata,48XD6@7742|Vertebrata,49RCV@7898|Actinopterygii	33208|Metazoa	T	ADP-ribosylation factor interacting protein 1 (arfaptin 1)	ARFIP1	GO:0000139,GO:0002791,GO:0003674,GO:0005488,GO:0005515,GO:0005543,GO:0005575,GO:0005622,GO:0005623,GO:0005737,GO:0005794,GO:0005802,GO:0005829,GO:0006810,GO:0006886,GO:0007610,GO:0008064,GO:0008092,GO:0008104,GO:0008150,GO:0008289,GO:0008582,GO:0009636,GO:0009987,GO:0010033,GO:0012505,GO:0015031,GO:0015833,GO:0016020,GO:0016043,GO:0030534,GO:0030832,GO:0030833,GO:0031090,GO:0031984,GO:0032271,GO:…	-	ko:K20314	-	-	-	-	ko00000,ko04131	-	-	-	Arfaptin
LEUER_T0000119	arfip1	52644.XP_010584425.1	9.33e-179	510.0	KOG3876@1|root,KOG3876@2759|Eukaryota,38FVB@33154|Opisthokonta,3B9RS@33208|Metazoa,3CSSE@33213|Bilateria,485QS@7711|Chordata,48XD6@7742|Vertebrata,4GQQD@8782|Aves	33208|Metazoa	T	factor interacting protein 1	ARFIP1	GO:0000139,GO:0002791,GO:0003674,GO:0005488,GO:0005515,GO:0005543,GO:0005575,GO:0005622,GO:0005623,GO:0005737,GO:0005794,GO:0005802,GO:0005829,GO:0006810,GO:0006886,GO:0007610,GO:0008064,GO:0008092,GO:0008104,GO:0008150,GO:0008289,GO:0008582,GO:0009636,GO:0009987,GO:0010033,GO:0012505,GO:0015031,GO:0015833,GO:0016020,GO:0016043,GO:0030534,GO:0030832,GO:0030833,GO:0031090,GO:0031984,GO:0032271,GO:…	-	ko:K20314	-	-	-	-	ko00000,ko04131	-	-	-	Arfaptin
LEUER_T0000120	arfip1	7918.ENSLOCP00000010374	6.62e-172	491.0	KOG3876@1|root,KOG3876@2759|Eukaryota,38FVB@33154|Opisthokonta,3B9RS@33208|Metazoa,3CSSE@33213|Bilateria,485QS@7711|Chordata,48XD6@7742|Vertebrata,49RCV@7898|Actinopterygii	33208|Metazoa	T	ADP-ribosylation factor interacting protein 1 (arfaptin 1)	ARFIP1	GO:0000139,GO:0002791,GO:0003674,GO:0005488,GO:0005515,GO:0005543,GO:0005575,GO:0005622,GO:0005623,GO:0005737,GO:0005794,GO:0005802,GO:0005829,GO:0006810,GO:0006886,GO:0007610,GO:0008064,GO:0008092,GO:0008104,GO:0008150,GO:0008289,GO:0008582,GO:0009636,GO:0009987,GO:0010033,GO:0012505,GO:0015031,GO:0015833,GO:0016020,GO:0016043,GO:0030534,GO:0030832,GO:0030833,GO:0031090,GO:0031984,GO:0032271,GO:…	-	ko:K20314	-	-	-	-	ko00000,ko04131	-	-	-	Arfaptin
LEUER_T0000126	LOC116970895	7918.ENSLOCP00000010389	1.75e-10	65.5	KOG0274@1|root,KOG0274@2759|Eukaryota,38B8G@33154|Opisthokonta,3BB6T@33208|Metazoa,3CYJY@33213|Bilateria,4860B@7711|Chordata,48WVM@7742|Vertebrata	33208|Metazoa	S	F-box and WD repeat domain containing 7, E3 ubiquitin protein ligase	FBXW7	GO:0000003,GO:0000151,GO:0000209,GO:0000819,GO:0000902,GO:0000904,GO:0001568,GO:0001570,GO:0001666,GO:0001763,GO:0001932,GO:0001934,GO:0001944,GO:0002009,GO:0002020,GO:0002682,GO:0002683,GO:0002761,GO:0002762,GO:0003006,GO:0003674,GO:0003700,GO:0003824,GO:0004842,GO:0005488,GO:0005515,GO:0005575,GO:0005622,GO:0005623,GO:0005634,GO:0005654,GO:0005730,GO:0005737,GO:0005739,GO:0005783,GO:0005794,GO:…	-	ko:K10260	ko04120,map04120	M00387	-	-	ko00000,ko00001,ko00002,ko04121,ko04131	-	-	-	F-box-like,WD40
LEUER_T0000127	LOC116970880	10181.XP_004869242.1	1.85e-193	566.0	KOG0274@1|root,KOG0274@2759|Eukaryota,38B8G@33154|Opisthokonta,3BB6T@33208|Metazoa,3CYJY@33213|Bilateria,4860B@7711|Chordata,48WVM@7742|Vertebrata,3J518@40674|Mammalia,35HNK@314146|Euarchontoglires,4Q3BK@9989|Rodentia	33208|Metazoa	S	F-box WD repeat-containing protein 7 isoform X1	FBXW7	GO:0000003,GO:0000151,GO:0000209,GO:0000819,GO:0000902,GO:0000904,GO:0001568,GO:0001570,GO:0001666,GO:0001763,GO:0001932,GO:0001934,GO:0001944,GO:0002009,GO:0002020,GO:0002682,GO:0002683,GO:0002761,GO:0002762,GO:0003006,GO:0003674,GO:0003700,GO:0003824,GO:0004842,GO:0005488,GO:0005515,GO:0005575,GO:0005622,GO:0005623,GO:0005634,GO:0005654,GO:0005730,GO:0005737,GO:0005739,GO:0005783,GO:0005794,GO:…	-	ko:K10260	ko04120,map04120	M00387	-	-	ko00000,ko00001,ko00002,ko04121,ko04131	-	-	-	F-box-like,WD40
LEUER_T0000128	LOC116970880	10181.XP_004869242.1	1.24e-191	561.0	KOG0274@1|root,KOG0274@2759|Eukaryota,38B8G@33154|Opisthokonta,3BB6T@33208|Metazoa,3CYJY@33213|Bilateria,4860B@7711|Chordata,48WVM@7742|Vertebrata,3J518@40674|Mammalia,35HNK@314146|Euarchontoglires,4Q3BK@9989|Rodentia	33208|Metazoa	S	F-box WD repeat-containing protein 7 isoform X1	FBXW7	GO:0000003,GO:0000151,GO:0000209,GO:0000819,GO:0000902,GO:0000904,GO:0001568,GO:0001570,GO:0001666,GO:0001763,GO:0001932,GO:0001934,GO:0001944,GO:0002009,GO:0002020,GO:0002682,GO:0002683,GO:0002761,GO:0002762,GO:0003006,GO:0003674,GO:0003700,GO:0003824,GO:0004842,GO:0005488,GO:0005515,GO:0005575,GO:0005622,GO:0005623,GO:0005634,GO:0005654,GO:0005730,GO:0005737,GO:0005739,GO:0005783,GO:0005794,GO:…	-	ko:K10260	ko04120,map04120	M00387	-	-	ko00000,ko00001,ko00002,ko04121,ko04131	-	-	-	F-box-like,WD40
LEUER_T0000129	LOC116970880	9739.XP_004321779.1	6.91e-193	561.0	KOG0274@1|root,KOG0274@2759|Eukaryota,38B8G@33154|Opisthokonta,3BB6T@33208|Metazoa,3CYJY@33213|Bilateria,4860B@7711|Chordata,48WVM@7742|Vertebrata,3JGAC@40674|Mammalia,4J712@91561|Cetartiodactyla	33208|Metazoa	B	A Receptor for Ubiquitination Targets	FBXW7	GO:0000003,GO:0000151,GO:0000209,GO:0000819,GO:0000902,GO:0000904,GO:0001568,GO:0001570,GO:0001666,GO:0001763,GO:0001932,GO:0001934,GO:0001944,GO:0002009,GO:0002020,GO:0002682,GO:0002683,GO:0002761,GO:0002762,GO:0003006,GO:0003674,GO:0003700,GO:0003824,GO:0004842,GO:0005488,GO:0005515,GO:0005575,GO:0005622,GO:0005623,GO:0005634,GO:0005654,GO:0005730,GO:0005737,GO:0005739,GO:0005783,GO:0005794,GO:…	-	ko:K10260	ko04120,map04120	M00387	-	-	ko00000,ko00001,ko00002,ko04121,ko04131	-	-	-	F-box-like,WD40
LEUER_T0000130	LOC116970880	9739.XP_004321779.1	4.68e-191	556.0	KOG0274@1|root,KOG0274@2759|Eukaryota,38B8G@33154|Opisthokonta,3BB6T@33208|Metazoa,3CYJY@33213|Bilateria,4860B@7711|Chordata,48WVM@7742|Vertebrata,3JGAC@40674|Mammalia,4J712@91561|Cetartiodactyla	33208|Metazoa	B	A Receptor for Ubiquitination Targets	FBXW7	GO:0000003,GO:0000151,GO:0000209,GO:0000819,GO:0000902,GO:0000904,GO:0001568,GO:0001570,GO:0001666,GO:0001763,GO:0001932,GO:0001934,GO:0001944,GO:0002009,GO:0002020,GO:0002682,GO:0002683,GO:0002761,GO:0002762,GO:0003006,GO:0003674,GO:0003700,GO:0003824,GO:0004842,GO:0005488,GO:0005515,GO:0005575,GO:0005622,GO:0005623,GO:0005634,GO:0005654,GO:0005730,GO:0005737,GO:0005739,GO:0005783,GO:0005794,GO:…	-	ko:K10260	ko04120,map04120	M00387	-	-	ko00000,ko00001,ko00002,ko04121,ko04131	-	-	-	F-box-like,WD40
LEUER_T0000131	gatb	8479.XP_005307416.1	2e-262	733.0	COG0064@1|root,KOG2438@2759|Eukaryota,38FEW@33154|Opisthokonta,3BBYP@33208|Metazoa,3CVHW@33213|Bilateria,4854B@7711|Chordata,49212@7742|Vertebrata,4CEE8@8459|Testudines	33208|Metazoa	J	Allows the formation of correctly charged Gln-tRNA(Gln) through the transamidation of misacylated Glu-tRNA(Gln) in the mitochondria. The reaction takes place in the presence of glutamine and ATP through an activated gamma-phospho-Glu- tRNA(Gln)	GATB	GO:0003674,GO:0003676,GO:0003723,GO:0003824,GO:0005488,GO:0005575,GO:0005622,GO:0005623,GO:0005737,GO:0005739,GO:0006082,GO:0006139,GO:0006399,GO:0006412,GO:0006418,GO:0006425,GO:0006518,GO:0006520,GO:0006725,GO:0006807,GO:0008135,GO:0008150,GO:0008152,GO:0009058,GO:0009059,GO:0009987,GO:0010467,GO:0016070,GO:0016874,GO:0016879,GO:0016884,GO:0019538,GO:0019752,GO:0030956,GO:0032543,GO:0032991,GO:…	6.3.5.6,6.3.5.7	ko:K02434	ko00970,ko01100,map00970,map01100	-	R03905,R04212	RC00010	ko00000,ko00001,ko01000,ko03029	-	-	-	GatB_N,GatB_Yqey
LEUER_T0000132	gatb	8479.XP_005307416.1	2.24e-261	731.0	COG0064@1|root,KOG2438@2759|Eukaryota,38FEW@33154|Opisthokonta,3BBYP@33208|Metazoa,3CVHW@33213|Bilateria,4854B@7711|Chordata,49212@7742|Vertebrata,4CEE8@8459|Testudines	33208|Metazoa	J	Allows the formation of correctly charged Gln-tRNA(Gln) through the transamidation of misacylated Glu-tRNA(Gln) in the mitochondria. The reaction takes place in the presence of glutamine and ATP through an activated gamma-phospho-Glu- tRNA(Gln)	GATB	GO:0003674,GO:0003676,GO:0003723,GO:0003824,GO:0005488,GO:0005575,GO:0005622,GO:0005623,GO:0005737,GO:0005739,GO:0006082,GO:0006139,GO:0006399,GO:0006412,GO:0006418,GO:0006425,GO:0006518,GO:0006520,GO:0006725,GO:0006807,GO:0008135,GO:0008150,GO:0008152,GO:0009058,GO:0009059,GO:0009987,GO:0010467,GO:0016070,GO:0016874,GO:0016879,GO:0016884,GO:0019538,GO:0019752,GO:0030956,GO:0032543,GO:0032991,GO:…	6.3.5.6,6.3.5.7	ko:K02434	ko00970,ko01100,map00970,map01100	-	R03905,R04212	RC00010	ko00000,ko00001,ko01000,ko03029	-	-	-	GatB_N,GatB_Yqey
LEUER_T0000133	gatb	8479.XP_005307416.1	1.19e-231	654.0	COG0064@1|root,KOG2438@2759|Eukaryota,38FEW@33154|Opisthokonta,3BBYP@33208|Metazoa,3CVHW@33213|Bilateria,4854B@7711|Chordata,49212@7742|Vertebrata,4CEE8@8459|Testudines	33208|Metazoa	J	Allows the formation of correctly charged Gln-tRNA(Gln) through the transamidation of misacylated Glu-tRNA(Gln) in the mitochondria. The reaction takes place in the presence of glutamine and ATP through an activated gamma-phospho-Glu- tRNA(Gln)	GATB	GO:0003674,GO:0003676,GO:0003723,GO:0003824,GO:0005488,GO:0005575,GO:0005622,GO:0005623,GO:0005737,GO:0005739,GO:0006082,GO:0006139,GO:0006399,GO:0006412,GO:0006418,GO:0006425,GO:0006518,GO:0006520,GO:0006725,GO:0006807,GO:0008135,GO:0008150,GO:0008152,GO:0009058,GO:0009059,GO:0009987,GO:0010467,GO:0016070,GO:0016874,GO:0016879,GO:0016884,GO:0019538,GO:0019752,GO:0030956,GO:0032543,GO:0032991,GO:…	6.3.5.6,6.3.5.7	ko:K02434	ko00970,ko01100,map00970,map01100	-	R03905,R04212	RC00010	ko00000,ko00001,ko01000,ko03029	-	-	-	GatB_N,GatB_Yqey
LEUER_T0000134	gatb	8479.XP_005307416.1	4.97e-199	569.0	COG0064@1|root,KOG2438@2759|Eukaryota,38FEW@33154|Opisthokonta,3BBYP@33208|Metazoa,3CVHW@33213|Bilateria,4854B@7711|Chordata,49212@7742|Vertebrata,4CEE8@8459|Testudines	33208|Metazoa	J	Allows the formation of correctly charged Gln-tRNA(Gln) through the transamidation of misacylated Glu-tRNA(Gln) in the mitochondria. The reaction takes place in the presence of glutamine and ATP through an activated gamma-phospho-Glu- tRNA(Gln)	GATB	GO:0003674,GO:0003676,GO:0003723,GO:0003824,GO:0005488,GO:0005575,GO:0005622,GO:0005623,GO:0005737,GO:0005739,GO:0006082,GO:0006139,GO:0006399,GO:0006412,GO:0006418,GO:0006425,GO:0006518,GO:0006520,GO:0006725,GO:0006807,GO:0008135,GO:0008150,GO:0008152,GO:0009058,GO:0009059,GO:0009987,GO:0010467,GO:0016070,GO:0016874,GO:0016879,GO:0016884,GO:0019538,GO:0019752,GO:0030956,GO:0032543,GO:0032991,GO:…	6.3.5.6,6.3.5.7	ko:K02434	ko00970,ko01100,map00970,map01100	-	R03905,R04212	RC00010	ko00000,ko00001,ko01000,ko03029	-	-	-	GatB_N,GatB_Yqey
LEUER_T0000136	fam160a1	7897.ENSLACP00000005991	0.0	1118.0	KOG3695@1|root,KOG3695@2759|Eukaryota,38C7C@33154|Opisthokonta,3BHGV@33208|Metazoa,3CUXW@33213|Bilateria,4875Q@7711|Chordata,494N6@7742|Vertebrata	33208|Metazoa	S	Retinoic acid induced 16-like protein	FAM160A1	-	-	-	-	-	-	-	-	-	-	-	RAI16-like
LEUER_T0000135	fam160a1	7897.ENSLACP00000005991	0.0	1118.0	KOG3695@1|root,KOG3695@2759|Eukaryota,38C7C@33154|Opisthokonta,3BHGV@33208|Metazoa,3CUXW@33213|Bilateria,4875Q@7711|Chordata,494N6@7742|Vertebrata	33208|Metazoa	S	Retinoic acid induced 16-like protein	FAM160A1	-	-	-	-	-	-	-	-	-	-	-	RAI16-like
LEUER_T0000138	sh3d19	9823.ENSSSCP00000025759	2.05e-118	387.0	KOG4225@1|root,KOG4225@2759|Eukaryota,38EJB@33154|Opisthokonta,3BCRX@33208|Metazoa,3CRWW@33213|Bilateria,482KD@7711|Chordata,48YMS@7742|Vertebrata,3J7XE@40674|Mammalia,4IVEF@91561|Cetartiodactyla	33208|Metazoa	T	SH3 domain-containing protein	SH3D19	GO:0003674,GO:0005488,GO:0005515,GO:0005575,GO:0005622,GO:0005623,GO:0005634,GO:0005654,GO:0005737,GO:0005829,GO:0005886,GO:0006996,GO:0007010,GO:0008150,GO:0009893,GO:0009894,GO:0009896,GO:0009987,GO:0010604,GO:0016020,GO:0016043,GO:0019222,GO:0022603,GO:0022604,GO:0030162,GO:0031323,GO:0031325,GO:0031329,GO:0031331,GO:0031974,GO:0031981,GO:0032268,GO:0032270,GO:0042176,GO:0043226,GO:0043227,GO:…	-	-	-	-	-	-	-	-	-	-	SH3_1,SH3_2,SH3_9
LEUER_T0000137	sh3d19	10181.XP_004869277.1	1.84e-180	558.0	KOG4225@1|root,KOG4225@2759|Eukaryota,38EJB@33154|Opisthokonta,3BCRX@33208|Metazoa,3CRWW@33213|Bilateria,482KD@7711|Chordata,48YMS@7742|Vertebrata,3J7XE@40674|Mammalia,35NMR@314146|Euarchontoglires,4PXPW@9989|Rodentia	33208|Metazoa	T	Src homology 3 domains	SH3D19	GO:0003674,GO:0005488,GO:0005515,GO:0005575,GO:0005622,GO:0005623,GO:0005634,GO:0005654,GO:0005737,GO:0005829,GO:0005886,GO:0006996,GO:0007010,GO:0008150,GO:0009893,GO:0009894,GO:0009896,GO:0009987,GO:0010604,GO:0016020,GO:0016043,GO:0019222,GO:0022603,GO:0022604,GO:0030162,GO:0031323,GO:0031325,GO:0031329,GO:0031331,GO:0031974,GO:0031981,GO:0032268,GO:0032270,GO:0042176,GO:0043226,GO:0043227,GO:…	-	-	-	-	-	-	-	-	-	-	SH3_1,SH3_2,SH3_9
LEUER_T0000139	rps3a	13735.ENSPSIP00000007916	1.13e-179	501.0	COG1890@1|root,KOG1628@2759|Eukaryota,38EQE@33154|Opisthokonta,3BDUP@33208|Metazoa,3CS91@33213|Bilateria,48AD5@7711|Chordata,491B6@7742|Vertebrata,4C79J@8459|Testudines	33208|Metazoa	J	ribosomal protein	RPS3A	GO:0000184,GO:0000956,GO:0002181,GO:0003674,GO:0003676,GO:0003723,GO:0003729,GO:0003735,GO:0005198,GO:0005488,GO:0005515,GO:0005575,GO:0005622,GO:0005623,GO:0005634,GO:0005654,GO:0005730,GO:0005737,GO:0005783,GO:0005829,GO:0005840,GO:0006139,GO:0006401,GO:0006402,GO:0006412,GO:0006413,GO:0006417,GO:0006518,GO:0006605,GO:0006612,GO:0006613,GO:0006614,GO:0006725,GO:0006807,GO:0006810,GO:0006886,GO:…	-	ko:K02984	ko03010,map03010	M00177,M00179	-	-	br01610,ko00000,ko00001,ko00002,ko03011	-	-	-	Ribosomal_S3Ae
LEUER_T0000140	lrba	8496.XP_006262713.1	0.0	4064.0	KOG1787@1|root,KOG1787@2759|Eukaryota,38D1H@33154|Opisthokonta,3BB6B@33208|Metazoa,3CVKQ@33213|Bilateria,480RD@7711|Chordata,496Q0@7742|Vertebrata	33208|Metazoa	U	lipopolysaccharide-responsive and beige-like anchor	LRBA	GO:0000323,GO:0001654,GO:0001745,GO:0001754,GO:0003008,GO:0003674,GO:0005488,GO:0005515,GO:0005575,GO:0005622,GO:0005623,GO:0005737,GO:0005764,GO:0005773,GO:0005783,GO:0005794,GO:0005802,GO:0005886,GO:0006810,GO:0007154,GO:0007165,GO:0007275,GO:0007399,GO:0007417,GO:0007420,GO:0007423,GO:0007528,GO:0007610,GO:0007611,GO:0007612,GO:0007613,GO:0007614,GO:0007635,GO:0008104,GO:0008150,GO:0008306,GO:…	-	-	-	-	-	-	-	-	-	-	Beach,DUF1088,DUF4704,Laminin_G_3,PH_BEACH,WD40
LEUER_T0000141	mab21l2	27679.XP_003928032.1	2.24e-263	721.0	KOG3963@1|root,KOG3963@2759|Eukaryota,38SXZ@33154|Opisthokonta,3BC77@33208|Metazoa,3CTHK@33213|Bilateria,48AGQ@7711|Chordata,48WTK@7742|Vertebrata,3J82Z@40674|Mammalia,35P3P@314146|Euarchontoglires,4MEBW@9443|Primates	33208|Metazoa	T	Mab-21-like 2 (C. elegans)	MAB21L2	GO:0001501,GO:0001654,GO:0002088,GO:0005575,GO:0005622,GO:0005623,GO:0005634,GO:0005737,GO:0007275,GO:0007399,GO:0007423,GO:0008150,GO:0008284,GO:0009653,GO:0009790,GO:0009792,GO:0009887,GO:0009987,GO:0010171,GO:0010172,GO:0030154,GO:0032501,GO:0032502,GO:0042127,GO:0043009,GO:0043010,GO:0043226,GO:0043227,GO:0043229,GO:0043231,GO:0044424,GO:0044464,GO:0045165,GO:0048048,GO:0048513,GO:0048518,GO:…	-	-	-	-	-	-	-	-	-	-	Mab-21
LEUER_T0000143	dclk2	8479.XP_008164320.1	0.0	1088.0	KOG0032@1|root,KOG0032@2759|Eukaryota,38EPX@33154|Opisthokonta,3BBQ1@33208|Metazoa,3CSN9@33213|Bilateria,4842G@7711|Chordata,48W3I@7742|Vertebrata,4C96N@8459|Testudines	33208|Metazoa	T	Domain in the Doublecortin (DCX) gene product	DCLK2	GO:0000226,GO:0000278,GO:0003674,GO:0003824,GO:0004672,GO:0004674,GO:0004683,GO:0005488,GO:0005515,GO:0005516,GO:0005575,GO:0005622,GO:0005623,GO:0005634,GO:0005737,GO:0005813,GO:0005815,GO:0005856,GO:0005875,GO:0006464,GO:0006468,GO:0006793,GO:0006796,GO:0006807,GO:0006996,GO:0007010,GO:0007017,GO:0007026,GO:0007049,GO:0007154,GO:0007165,GO:0007275,GO:0007399,GO:0007417,GO:0007420,GO:0008017,GO:…	2.7.11.1	ko:K08805	-	-	-	-	ko00000,ko01000,ko01001	-	-	-	DCX,Pkinase
LEUER_T0000146	dclk2	8479.XP_008164320.1	0.0	1108.0	KOG0032@1|root,KOG0032@2759|Eukaryota,38EPX@33154|Opisthokonta,3BBQ1@33208|Metazoa,3CSN9@33213|Bilateria,4842G@7711|Chordata,48W3I@7742|Vertebrata,4C96N@8459|Testudines	33208|Metazoa	T	Domain in the Doublecortin (DCX) gene product	DCLK2	GO:0000226,GO:0000278,GO:0003674,GO:0003824,GO:0004672,GO:0004674,GO:0004683,GO:0005488,GO:0005515,GO:0005516,GO:0005575,GO:0005622,GO:0005623,GO:0005634,GO:0005737,GO:0005813,GO:0005815,GO:0005856,GO:0005875,GO:0006464,GO:0006468,GO:0006793,GO:0006796,GO:0006807,GO:0006996,GO:0007010,GO:0007017,GO:0007026,GO:0007049,GO:0007154,GO:0007165,GO:0007275,GO:0007399,GO:0007417,GO:0007420,GO:0008017,GO:…	2.7.11.1	ko:K08805	-	-	-	-	ko00000,ko01000,ko01001	-	-	-	DCX,Pkinase
LEUER_T0000142	dclk2	8479.XP_008164320.1	0.0	1118.0	KOG0032@1|root,KOG0032@2759|Eukaryota,38EPX@33154|Opisthokonta,3BBQ1@33208|Metazoa,3CSN9@33213|Bilateria,4842G@7711|Chordata,48W3I@7742|Vertebrata,4C96N@8459|Testudines	33208|Metazoa	T	Domain in the Doublecortin (DCX) gene product	DCLK2	GO:0000226,GO:0000278,GO:0003674,GO:0003824,GO:0004672,GO:0004674,GO:0004683,GO:0005488,GO:0005515,GO:0005516,GO:0005575,GO:0005622,GO:0005623,GO:0005634,GO:0005737,GO:0005813,GO:0005815,GO:0005856,GO:0005875,GO:0006464,GO:0006468,GO:0006793,GO:0006796,GO:0006807,GO:0006996,GO:0007010,GO:0007017,GO:0007026,GO:0007049,GO:0007154,GO:0007165,GO:0007275,GO:0007399,GO:0007417,GO:0007420,GO:0008017,GO:…	2.7.11.1	ko:K08805	-	-	-	-	ko00000,ko01000,ko01001	-	-	-	DCX,Pkinase
LEUER_T0000144	dclk2	8479.XP_008164320.1	0.0	1131.0	KOG0032@1|root,KOG0032@2759|Eukaryota,38EPX@33154|Opisthokonta,3BBQ1@33208|Metazoa,3CSN9@33213|Bilateria,4842G@7711|Chordata,48W3I@7742|Vertebrata,4C96N@8459|Testudines	33208|Metazoa	T	Domain in the Doublecortin (DCX) gene product	DCLK2	GO:0000226,GO:0000278,GO:0003674,GO:0003824,GO:0004672,GO:0004674,GO:0004683,GO:0005488,GO:0005515,GO:0005516,GO:0005575,GO:0005622,GO:0005623,GO:0005634,GO:0005737,GO:0005813,GO:0005815,GO:0005856,GO:0005875,GO:0006464,GO:0006468,GO:0006793,GO:0006796,GO:0006807,GO:0006996,GO:0007010,GO:0007017,GO:0007026,GO:0007049,GO:0007154,GO:0007165,GO:0007275,GO:0007399,GO:0007417,GO:0007420,GO:0008017,GO:…	2.7.11.1	ko:K08805	-	-	-	-	ko00000,ko01000,ko01001	-	-	-	DCX,Pkinase
LEUER_T0000145	dclk2	8479.XP_008164320.1	0.0	1137.0	KOG0032@1|root,KOG0032@2759|Eukaryota,38EPX@33154|Opisthokonta,3BBQ1@33208|Metazoa,3CSN9@33213|Bilateria,4842G@7711|Chordata,48W3I@7742|Vertebrata,4C96N@8459|Testudines	33208|Metazoa	T	Domain in the Doublecortin (DCX) gene product	DCLK2	GO:0000226,GO:0000278,GO:0003674,GO:0003824,GO:0004672,GO:0004674,GO:0004683,GO:0005488,GO:0005515,GO:0005516,GO:0005575,GO:0005622,GO:0005623,GO:0005634,GO:0005737,GO:0005813,GO:0005815,GO:0005856,GO:0005875,GO:0006464,GO:0006468,GO:0006793,GO:0006796,GO:0006807,GO:0006996,GO:0007010,GO:0007017,GO:0007026,GO:0007049,GO:0007154,GO:0007165,GO:0007275,GO:0007399,GO:0007417,GO:0007420,GO:0008017,GO:…	2.7.11.1	ko:K08805	-	-	-	-	ko00000,ko01000,ko01001	-	-	-	DCX,Pkinase
LEUER_T0000147	dclk2	8479.XP_008164320.1	0.0	1082.0	KOG0032@1|root,KOG0032@2759|Eukaryota,38EPX@33154|Opisthokonta,3BBQ1@33208|Metazoa,3CSN9@33213|Bilateria,4842G@7711|Chordata,48W3I@7742|Vertebrata,4C96N@8459|Testudines	33208|Metazoa	T	Domain in the Doublecortin (DCX) gene product	DCLK2	GO:0000226,GO:0000278,GO:0003674,GO:0003824,GO:0004672,GO:0004674,GO:0004683,GO:0005488,GO:0005515,GO:0005516,GO:0005575,GO:0005622,GO:0005623,GO:0005634,GO:0005737,GO:0005813,GO:0005815,GO:0005856,GO:0005875,GO:0006464,GO:0006468,GO:0006793,GO:0006796,GO:0006807,GO:0006996,GO:0007010,GO:0007017,GO:0007026,GO:0007049,GO:0007154,GO:0007165,GO:0007275,GO:0007399,GO:0007417,GO:0007420,GO:0008017,GO:…	2.7.11.1	ko:K08805	-	-	-	-	ko00000,ko01000,ko01001	-	-	-	DCX,Pkinase
LEUER_T0000148	mgarp	28377.ENSACAP00000021186	1.28e-15	72.8	2DZFP@1|root,2S6ZU@2759|Eukaryota,39YE5@33154|Opisthokonta,3BIAV@33208|Metazoa,3D2R7@33213|Bilateria,48C5Z@7711|Chordata,495P1@7742|Vertebrata	33208|Metazoa	S	response to gonadotropin-releasing hormone	MGARP	GO:0001666,GO:0005575,GO:0005622,GO:0005623,GO:0005737,GO:0005739,GO:0005740,GO:0005741,GO:0006605,GO:0006626,GO:0006810,GO:0006839,GO:0006886,GO:0006928,GO:0006950,GO:0006996,GO:0007005,GO:0007017,GO:0007018,GO:0008088,GO:0008089,GO:0008090,GO:0008104,GO:0008150,GO:0009628,GO:0009719,GO:0009725,GO:0009987,GO:0010033,GO:0010243,GO:0010638,GO:0010821,GO:0010822,GO:0010970,GO:0014070,GO:0015031,GO:…	-	-	-	-	-	-	-	-	-	-	AIF-MLS
LEUER_T0000149	mgarp	28377.ENSACAP00000021186	1.28e-15	72.8	2DZFP@1|root,2S6ZU@2759|Eukaryota,39YE5@33154|Opisthokonta,3BIAV@33208|Metazoa,3D2R7@33213|Bilateria,48C5Z@7711|Chordata,495P1@7742|Vertebrata	33208|Metazoa	S	response to gonadotropin-releasing hormone	MGARP	GO:0001666,GO:0005575,GO:0005622,GO:0005623,GO:0005737,GO:0005739,GO:0005740,GO:0005741,GO:0006605,GO:0006626,GO:0006810,GO:0006839,GO:0006886,GO:0006928,GO:0006950,GO:0006996,GO:0007005,GO:0007017,GO:0007018,GO:0008088,GO:0008089,GO:0008090,GO:0008104,GO:0008150,GO:0009628,GO:0009719,GO:0009725,GO:0009987,GO:0010033,GO:0010243,GO:0010638,GO:0010821,GO:0010822,GO:0010970,GO:0014070,GO:0015031,GO:…	-	-	-	-	-	-	-	-	-	-	AIF-MLS
LEUER_T0000150	iqcm	7918.ENSLOCP00000010561	7.47e-60	211.0	2AS8M@1|root,2RZP8@2759|Eukaryota,38M7J@33154|Opisthokonta,3BNIK@33208|Metazoa,3D5B2@33213|Bilateria,485UX@7711|Chordata,4929B@7742|Vertebrata	33208|Metazoa	S	Short calmodulin-binding motif containing conserved Ile and Gln residues.	IQCM	-	-	-	-	-	-	-	-	-	-	-	IQ
LEUER_T0000151	nr3c2	59894.ENSFALP00000005645	7.27e-237	702.0	KOG3575@1|root,KOG3575@2759|Eukaryota,39W7K@33154|Opisthokonta,3BH38@33208|Metazoa,3CYXT@33213|Bilateria,48552@7711|Chordata,48VFF@7742|Vertebrata,4GKVJ@8782|Aves	33208|Metazoa	K	Nuclear receptor subfamily 3, group C, member 2	NR3C2	GO:0000981,GO:0003008,GO:0003674,GO:0003676,GO:0003677,GO:0003690,GO:0003700,GO:0003707,GO:0004879,GO:0005488,GO:0005496,GO:0005515,GO:0005575,GO:0005622,GO:0005623,GO:0005634,GO:0005654,GO:0005737,GO:0005783,GO:0005789,GO:0005829,GO:0006139,GO:0006351,GO:0006352,GO:0006355,GO:0006357,GO:0006366,GO:0006367,GO:0006725,GO:0006807,GO:0006873,GO:0006875,GO:0006883,GO:0007154,GO:0007165,GO:0007588,GO:…	-	ko:K08555	ko04960,map04960	-	-	-	ko00000,ko00001,ko03000,ko03310	-	-	-	Hormone_recep,zf-C4
LEUER_T0000152	nr3c2	59894.ENSFALP00000005645	1.38e-236	702.0	KOG3575@1|root,KOG3575@2759|Eukaryota,39W7K@33154|Opisthokonta,3BH38@33208|Metazoa,3CYXT@33213|Bilateria,48552@7711|Chordata,48VFF@7742|Vertebrata,4GKVJ@8782|Aves	33208|Metazoa	K	Nuclear receptor subfamily 3, group C, member 2	NR3C2	GO:0000981,GO:0003008,GO:0003674,GO:0003676,GO:0003677,GO:0003690,GO:0003700,GO:0003707,GO:0004879,GO:0005488,GO:0005496,GO:0005515,GO:0005575,GO:0005622,GO:0005623,GO:0005634,GO:0005654,GO:0005737,GO:0005783,GO:0005789,GO:0005829,GO:0006139,GO:0006351,GO:0006352,GO:0006355,GO:0006357,GO:0006366,GO:0006367,GO:0006725,GO:0006807,GO:0006873,GO:0006875,GO:0006883,GO:0007154,GO:0007165,GO:0007588,GO:…	-	ko:K08555	ko04960,map04960	-	-	-	ko00000,ko00001,ko03000,ko03310	-	-	-	Hormone_recep,zf-C4
LEUER_T0000153	nr3c2	59894.ENSFALP00000005645	7.27e-237	702.0	KOG3575@1|root,KOG3575@2759|Eukaryota,39W7K@33154|Opisthokonta,3BH38@33208|Metazoa,3CYXT@33213|Bilateria,48552@7711|Chordata,48VFF@7742|Vertebrata,4GKVJ@8782|Aves	33208|Metazoa	K	Nuclear receptor subfamily 3, group C, member 2	NR3C2	GO:0000981,GO:0003008,GO:0003674,GO:0003676,GO:0003677,GO:0003690,GO:0003700,GO:0003707,GO:0004879,GO:0005488,GO:0005496,GO:0005515,GO:0005575,GO:0005622,GO:0005623,GO:0005634,GO:0005654,GO:0005737,GO:0005783,GO:0005789,GO:0005829,GO:0006139,GO:0006351,GO:0006352,GO:0006355,GO:0006357,GO:0006366,GO:0006367,GO:0006725,GO:0006807,GO:0006873,GO:0006875,GO:0006883,GO:0007154,GO:0007165,GO:0007588,GO:…	-	ko:K08555	ko04960,map04960	-	-	-	ko00000,ko00001,ko03000,ko03310	-	-	-	Hormone_recep,zf-C4
LEUER_T0000155	arhgap10	8469.XP_007055764.1	2.09e-276	783.0	KOG1451@1|root,KOG1451@2759|Eukaryota,38GJW@33154|Opisthokonta,3BCDA@33208|Metazoa,3CXTK@33213|Bilateria,47ZWG@7711|Chordata,48ZEP@7742|Vertebrata,4C9TI@8459|Testudines	33208|Metazoa	T	Rho GTPase activating protein 10	ARHGAP10	GO:0003674,GO:0005096,GO:0005488,GO:0005515,GO:0005543,GO:0005575,GO:0005622,GO:0005623,GO:0005737,GO:0005829,GO:0005886,GO:0006996,GO:0007010,GO:0007154,GO:0007165,GO:0007264,GO:0007265,GO:0007266,GO:0008047,GO:0008150,GO:0008289,GO:0009966,GO:0009987,GO:0010646,GO:0010941,GO:0016020,GO:0016043,GO:0023051,GO:0023052,GO:0030234,GO:0030695,GO:0035556,GO:0042981,GO:0043066,GO:0043067,GO:0043069,GO:…	-	ko:K13736,ko:K20071,ko:K20651	ko05100,map05100	-	-	-	ko00000,ko00001,ko04131	-	-	-	BAR_3,PH,RhoGAP,SH3_9
LEUER_T0000154	arhgap10	1026970.XP_008849324.1	0.0	941.0	KOG1451@1|root,KOG1451@2759|Eukaryota,38GJW@33154|Opisthokonta,3BCDA@33208|Metazoa,3CXTK@33213|Bilateria,47ZWG@7711|Chordata,48ZEP@7742|Vertebrata,3J7Y9@40674|Mammalia,35MR6@314146|Euarchontoglires,4Q1F1@9989|Rodentia	33208|Metazoa	T	Rho GTPase-activating protein 10	ARHGAP10	GO:0003674,GO:0005096,GO:0005488,GO:0005515,GO:0005543,GO:0005575,GO:0005622,GO:0005623,GO:0005737,GO:0005829,GO:0005886,GO:0006996,GO:0007010,GO:0007154,GO:0007165,GO:0007264,GO:0007265,GO:0007266,GO:0008047,GO:0008150,GO:0008289,GO:0009966,GO:0009987,GO:0010646,GO:0010941,GO:0016020,GO:0016043,GO:0023051,GO:0023052,GO:0030234,GO:0030695,GO:0035556,GO:0042981,GO:0043066,GO:0043067,GO:0043069,GO:…	-	ko:K13736,ko:K20071,ko:K20651	ko05100,map05100	-	-	-	ko00000,ko00001,ko04131	-	-	-	BAR_3,PH,RhoGAP,SH3_9
LEUER_T0000156	prmt9	7897.ENSLACP00000003662	0.0	1055.0	COG0500@1|root,KOG1501@2759|Eukaryota,38FYT@33154|Opisthokonta,3BFCI@33208|Metazoa,3CTXH@33213|Bilateria,48BK0@7711|Chordata,48Y94@7742|Vertebrata	33208|Metazoa	Q	protein-arginine omega-N symmetric methyltransferase activity	PRMT9	GO:0003674,GO:0003824,GO:0005575,GO:0005622,GO:0005623,GO:0005737,GO:0006139,GO:0006396,GO:0006397,GO:0006464,GO:0006479,GO:0006725,GO:0006807,GO:0008150,GO:0008152,GO:0008168,GO:0008170,GO:0008213,GO:0008276,GO:0008757,GO:0009987,GO:0010467,GO:0016070,GO:0016071,GO:0016273,GO:0016274,GO:0016740,GO:0016741,GO:0018193,GO:0018195,GO:0018216,GO:0019538,GO:0019918,GO:0032259,GO:0034641,GO:0035243,GO:…	2.1.1.320	ko:K19737	-	-	R11216,R11218,R11220	RC00003,RC02120,RC03389,RC03391	ko00000,ko01000,ko03036	-	-	-	PrmA
LEUER_T0000157	tmem184c	7897.ENSLACP00000001655	9.51e-263	727.0	KOG2641@1|root,KOG2641@2759|Eukaryota,38E90@33154|Opisthokonta,3BA2G@33208|Metazoa,3CYUJ@33213|Bilateria,487BA@7711|Chordata,48W6B@7742|Vertebrata	33208|Metazoa	T	transporter activity	TMEM184C	GO:0003674,GO:0005215,GO:0005575,GO:0016020,GO:0016021,GO:0031224,GO:0044425	-	-	-	-	-	-	-	-	-	-	Solute_trans_a
LEUER_T0000158	LOC116971048	10116.ENSRNOP00000054967	9.31e-170	490.0	KOG3656@1|root,KOG3656@2759|Eukaryota,38H86@33154|Opisthokonta,3BH7H@33208|Metazoa,3CXWF@33213|Bilateria,4804J@7711|Chordata,491KJ@7742|Vertebrata,3J4D5@40674|Mammalia,35JV1@314146|Euarchontoglires	33208|Metazoa	T	Belongs to the G-protein coupled receptor 1 family	EDNRA	GO:0000003,GO:0001525,GO:0001568,GO:0001569,GO:0001653,GO:0001666,GO:0001701,GO:0001763,GO:0001821,GO:0001932,GO:0001934,GO:0001944,GO:0002009,GO:0002237,GO:0002682,GO:0002684,GO:0002685,GO:0002687,GO:0002688,GO:0002690,GO:0003008,GO:0003012,GO:0003013,GO:0003014,GO:0003018,GO:0003094,GO:0003674,GO:0003824,GO:0004435,GO:0004620,GO:0004629,GO:0004888,GO:0004930,GO:0004962,GO:0005575,GO:0005622,GO:…	-	ko:K04197	ko04020,ko04022,ko04024,ko04080,ko04270,ko04924,ko05200,map04020,map04022,map04024,map04080,map04270,map04924,map05200	-	-	-	ko00000,ko00001,ko04030	-	-	-	7tm_1
LEUER_T0000159	LOC116971039	109478.XP_005871462.1	1.29e-168	487.0	KOG3656@1|root,KOG3656@2759|Eukaryota,38H86@33154|Opisthokonta,3BH7H@33208|Metazoa,3CXWF@33213|Bilateria,4804J@7711|Chordata,491KJ@7742|Vertebrata,3J4D5@40674|Mammalia,4KTWH@9397|Chiroptera	33208|Metazoa	T	receptor	EDNRA	GO:0000003,GO:0001525,GO:0001568,GO:0001569,GO:0001653,GO:0001666,GO:0001701,GO:0001763,GO:0001821,GO:0001932,GO:0001934,GO:0001944,GO:0002009,GO:0002237,GO:0002682,GO:0002684,GO:0002685,GO:0002687,GO:0002688,GO:0002690,GO:0003008,GO:0003012,GO:0003013,GO:0003014,GO:0003018,GO:0003094,GO:0003674,GO:0003824,GO:0004435,GO:0004620,GO:0004629,GO:0004888,GO:0004930,GO:0004962,GO:0005575,GO:0005622,GO:…	-	ko:K04197	ko04020,ko04022,ko04024,ko04080,ko04270,ko04924,ko05200,map04020,map04022,map04024,map04080,map04270,map04924,map05200	-	-	-	ko00000,ko00001,ko04030	-	-	-	7tm_1
LEUER_T0000160	ttc29	7897.ENSLACP00000023616	1.1e-115	354.0	2CDDH@1|root,2QQ2U@2759|Eukaryota,38FDV@33154|Opisthokonta,3BHGZ@33208|Metazoa,3D00V@33213|Bilateria,47ZGU@7711|Chordata,48VWE@7742|Vertebrata	33208|Metazoa	S	tetratricopeptide repeat	TTC29	-	-	-	-	-	-	-	-	-	-	-	TPR_12,TPR_16,TPR_6,TPR_7,TPR_8
LEUER_T0000161	pou4f2	7918.ENSLOCP00000010735	9.08e-166	476.0	KOG3802@1|root,KOG1168@2759|Eukaryota,38C19@33154|Opisthokonta,3BAU8@33208|Metazoa,3CW0S@33213|Bilateria,47ZYS@7711|Chordata,495MA@7742|Vertebrata,49VAW@7898|Actinopterygii	33208|Metazoa	K	POU domain, class 4, transcription factor	POU4F2	GO:0000003,GO:0000122,GO:0000165,GO:0000902,GO:0000904,GO:0000976,GO:0000977,GO:0000978,GO:0000981,GO:0000982,GO:0000987,GO:0001012,GO:0001067,GO:0001077,GO:0001078,GO:0001227,GO:0001228,GO:0001558,GO:0001654,GO:0001708,GO:0002682,GO:0002684,GO:0002761,GO:0002763,GO:0003008,GO:0003674,GO:0003676,GO:0003677,GO:0003682,GO:0003690,GO:0003700,GO:0003712,GO:0003713,GO:0003714,GO:0005488,GO:0005515,GO:…	-	ko:K09366	-	-	-	-	ko00000,ko03000	-	-	-	Homeobox,Pou
LEUER_T0000162	slc10a7	9818.XP_007942304.1	1.22e-84	260.0	COG0385@1|root,KOG4821@2759|Eukaryota,38RUU@33154|Opisthokonta,3BCZN@33208|Metazoa,3CXIQ@33213|Bilateria,481X7@7711|Chordata,492T3@7742|Vertebrata,3J3RR@40674|Mammalia,350AY@311790|Afrotheria	33208|Metazoa	S	Sodium bile acid cotransporter 7	SLC10A7	-	-	ko:K14347	-	-	-	-	ko00000,ko02000,ko04147	2.A.93.1	-	-	SBF_like
LEUER_T0000163	slc10a7	9031.ENSGALP00000037778	7.31e-202	564.0	COG0385@1|root,KOG4821@2759|Eukaryota,38RUU@33154|Opisthokonta,3BCZN@33208|Metazoa,3CXIQ@33213|Bilateria,481X7@7711|Chordata,492T3@7742|Vertebrata,4GQQ5@8782|Aves	33208|Metazoa	S	Sodium bile acid cotransporter	SLC10A7	-	-	ko:K14347	-	-	-	-	ko00000,ko02000,ko04147	2.A.93.1	-	-	SBF_like
LEUER_T0000164	reeld1	8496.XP_006277738.1	2.54e-113	354.0	2AHVG@1|root,2RZ3B@2759|Eukaryota,39UYF@33154|Opisthokonta,3BEJD@33208|Metazoa,3CYYR@33213|Bilateria,4836E@7711|Chordata,496VX@7742|Vertebrata	33208|Metazoa	-	-	-	-	-	-	-	-	-	-	-	-	-	-	Reeler
LEUER_T0000167	lsm6	10029.XP_007630704.1	3.33e-51	161.0	COG1958@1|root,KOG1783@2759|Eukaryota,3A5NM@33154|Opisthokonta,3BSKH@33208|Metazoa,3D8AQ@33213|Bilateria,48F8H@7711|Chordata,49C6R@7742|Vertebrata,3JHAH@40674|Mammalia,35QT9@314146|Euarchontoglires,4Q5TD@9989|Rodentia	33208|Metazoa	A	LSM domain	LSM6	GO:0000288,GO:0000291,GO:0000375,GO:0000377,GO:0000398,GO:0000932,GO:0000956,GO:0003674,GO:0003676,GO:0003723,GO:0005488,GO:0005515,GO:0005575,GO:0005622,GO:0005623,GO:0005634,GO:0005654,GO:0005681,GO:0005688,GO:0005730,GO:0005732,GO:0005737,GO:0005829,GO:0006139,GO:0006364,GO:0006396,GO:0006397,GO:0006401,GO:0006402,GO:0006725,GO:0006807,GO:0008150,GO:0008152,GO:0008380,GO:0009056,GO:0009057,GO:…	-	ko:K12625	ko03018,ko03040,map03018,map03040	M00354,M00396,M00397	-	-	ko00000,ko00001,ko00002,ko03019,ko03041	-	-	-	LSM
LEUER_T0000166	lsm6	10029.XP_007630704.1	3.33e-51	161.0	COG1958@1|root,KOG1783@2759|Eukaryota,3A5NM@33154|Opisthokonta,3BSKH@33208|Metazoa,3D8AQ@33213|Bilateria,48F8H@7711|Chordata,49C6R@7742|Vertebrata,3JHAH@40674|Mammalia,35QT9@314146|Euarchontoglires,4Q5TD@9989|Rodentia	33208|Metazoa	A	LSM domain	LSM6	GO:0000288,GO:0000291,GO:0000375,GO:0000377,GO:0000398,GO:0000932,GO:0000956,GO:0003674,GO:0003676,GO:0003723,GO:0005488,GO:0005515,GO:0005575,GO:0005622,GO:0005623,GO:0005634,GO:0005654,GO:0005681,GO:0005688,GO:0005730,GO:0005732,GO:0005737,GO:0005829,GO:0006139,GO:0006364,GO:0006396,GO:0006397,GO:0006401,GO:0006402,GO:0006725,GO:0006807,GO:0008150,GO:0008152,GO:0008380,GO:0009056,GO:0009057,GO:…	-	ko:K12625	ko03018,ko03040,map03018,map03040	M00354,M00396,M00397	-	-	ko00000,ko00001,ko00002,ko03019,ko03041	-	-	-	LSM
LEUER_T0000165	lsm6	10029.XP_007630704.1	3.33e-51	161.0	COG1958@1|root,KOG1783@2759|Eukaryota,3A5NM@33154|Opisthokonta,3BSKH@33208|Metazoa,3D8AQ@33213|Bilateria,48F8H@7711|Chordata,49C6R@7742|Vertebrata,3JHAH@40674|Mammalia,35QT9@314146|Euarchontoglires,4Q5TD@9989|Rodentia	33208|Metazoa	A	LSM domain	LSM6	GO:0000288,GO:0000291,GO:0000375,GO:0000377,GO:0000398,GO:0000932,GO:0000956,GO:0003674,GO:0003676,GO:0003723,GO:0005488,GO:0005515,GO:0005575,GO:0005622,GO:0005623,GO:0005634,GO:0005654,GO:0005681,GO:0005688,GO:0005730,GO:0005732,GO:0005737,GO:0005829,GO:0006139,GO:0006364,GO:0006396,GO:0006397,GO:0006401,GO:0006402,GO:0006725,GO:0006807,GO:0008150,GO:0008152,GO:0008380,GO:0009056,GO:0009057,GO:…	-	ko:K12625	ko03018,ko03040,map03018,map03040	M00354,M00396,M00397	-	-	ko00000,ko00001,ko00002,ko03019,ko03041	-	-	-	LSM
LEUER_T0000168	smad1	176946.XP_007437569.1	2.15e-315	861.0	KOG3701@1|root,KOG3701@2759|Eukaryota,38BD4@33154|Opisthokonta,3BA66@33208|Metazoa,3CRAN@33213|Bilateria,488YT@7711|Chordata,494DE@7742|Vertebrata	33208|Metazoa	K	osteoblast fate commitment	SMAD1	GO:0000003,GO:0000165,GO:0000976,GO:0000977,GO:0000978,GO:0000981,GO:0000982,GO:0000987,GO:0001012,GO:0001067,GO:0001077,GO:0001228,GO:0001501,GO:0001503,GO:0001649,GO:0001655,GO:0001657,GO:0001704,GO:0001707,GO:0001710,GO:0001822,GO:0001823,GO:0002051,GO:0002376,GO:0002520,GO:0003002,GO:0003674,GO:0003676,GO:0003677,GO:0003690,GO:0003700,GO:0003723,GO:0005072,GO:0005488,GO:0005515,GO:0005575,GO:…	-	ko:K04676,ko:K16790,ko:K16791	ko04350,ko04390,ko04391,ko04550,ko05202,map04350,map04390,map04391,map04550,map05202	M00679	-	-	ko00000,ko00001,ko00002	-	-	-	MH1,MH2
LEUER_T0000169	smad1	176946.XP_007437569.1	2.15e-315	861.0	KOG3701@1|root,KOG3701@2759|Eukaryota,38BD4@33154|Opisthokonta,3BA66@33208|Metazoa,3CRAN@33213|Bilateria,488YT@7711|Chordata,494DE@7742|Vertebrata	33208|Metazoa	K	osteoblast fate commitment	SMAD1	GO:0000003,GO:0000165,GO:0000976,GO:0000977,GO:0000978,GO:0000981,GO:0000982,GO:0000987,GO:0001012,GO:0001067,GO:0001077,GO:0001228,GO:0001501,GO:0001503,GO:0001649,GO:0001655,GO:0001657,GO:0001704,GO:0001707,GO:0001710,GO:0001822,GO:0001823,GO:0002051,GO:0002376,GO:0002520,GO:0003002,GO:0003674,GO:0003676,GO:0003677,GO:0003690,GO:0003700,GO:0003723,GO:0005072,GO:0005488,GO:0005515,GO:0005575,GO:…	-	ko:K04676,ko:K16790,ko:K16791	ko04350,ko04390,ko04391,ko04550,ko05202,map04350,map04390,map04391,map04550,map05202	M00679	-	-	ko00000,ko00001,ko00002	-	-	-	MH1,MH2
LEUER_T0000170	smad1	176946.XP_007437569.1	2.15e-315	861.0	KOG3701@1|root,KOG3701@2759|Eukaryota,38BD4@33154|Opisthokonta,3BA66@33208|Metazoa,3CRAN@33213|Bilateria,488YT@7711|Chordata,494DE@7742|Vertebrata	33208|Metazoa	K	osteoblast fate commitment	SMAD1	GO:0000003,GO:0000165,GO:0000976,GO:0000977,GO:0000978,GO:0000981,GO:0000982,GO:0000987,GO:0001012,GO:0001067,GO:0001077,GO:0001228,GO:0001501,GO:0001503,GO:0001649,GO:0001655,GO:0001657,GO:0001704,GO:0001707,GO:0001710,GO:0001822,GO:0001823,GO:0002051,GO:0002376,GO:0002520,GO:0003002,GO:0003674,GO:0003676,GO:0003677,GO:0003690,GO:0003700,GO:0003723,GO:0005072,GO:0005488,GO:0005515,GO:0005575,GO:…	-	ko:K04676,ko:K16790,ko:K16791	ko04350,ko04390,ko04391,ko04550,ko05202,map04350,map04390,map04391,map04550,map05202	M00679	-	-	ko00000,ko00001,ko00002	-	-	-	MH1,MH2
LEUER_T0000172	mmaa	28377.ENSACAP00000003498	2.37e-131	388.0	COG1703@1|root,2QR2W@2759|Eukaryota,38GCT@33154|Opisthokonta,3B9TV@33208|Metazoa,3CVKS@33213|Bilateria,489B6@7711|Chordata,49141@7742|Vertebrata	33208|Metazoa	E	cobalamin biosynthetic process	MMAA	GO:0000166,GO:0001882,GO:0001883,GO:0003674,GO:0003824,GO:0003924,GO:0005488,GO:0005515,GO:0005525,GO:0005575,GO:0005622,GO:0005623,GO:0005737,GO:0005739,GO:0005759,GO:0006725,GO:0006766,GO:0006767,GO:0006807,GO:0008150,GO:0008152,GO:0009235,GO:0009987,GO:0016462,GO:0016787,GO:0016817,GO:0016818,GO:0017076,GO:0017111,GO:0017144,GO:0019001,GO:0031974,GO:0032549,GO:0032550,GO:0032553,GO:0032555,GO:…	-	ko:K07588	-	-	-	-	ko00000,ko01000	-	-	-	ArgK
LEUER_T0000171	mmaa	8469.XP_007070206.1	1.89e-133	395.0	COG1703@1|root,2QR2W@2759|Eukaryota,38GCT@33154|Opisthokonta,3B9TV@33208|Metazoa,3CVKS@33213|Bilateria,489B6@7711|Chordata,49141@7742|Vertebrata,4CGW7@8459|Testudines	33208|Metazoa	K	Methylmalonic aciduria (cobalamin deficiency) cblA type	MMAA	GO:0000166,GO:0001882,GO:0001883,GO:0003674,GO:0003824,GO:0003924,GO:0005488,GO:0005515,GO:0005525,GO:0005575,GO:0005622,GO:0005623,GO:0005737,GO:0005739,GO:0005759,GO:0006725,GO:0006766,GO:0006767,GO:0006807,GO:0008150,GO:0008152,GO:0009235,GO:0009987,GO:0016462,GO:0016787,GO:0016817,GO:0016818,GO:0017076,GO:0017111,GO:0017144,GO:0019001,GO:0031974,GO:0032549,GO:0032550,GO:0032553,GO:0032555,GO:…	-	ko:K07588	-	-	-	-	ko00000,ko01000	-	-	-	ArgK
LEUER_T0000173	mmaa	8469.XP_007070206.1	1.11e-172	496.0	COG1703@1|root,2QR2W@2759|Eukaryota,38GCT@33154|Opisthokonta,3B9TV@33208|Metazoa,3CVKS@33213|Bilateria,489B6@7711|Chordata,49141@7742|Vertebrata,4CGW7@8459|Testudines	33208|Metazoa	K	Methylmalonic aciduria (cobalamin deficiency) cblA type	MMAA	GO:0000166,GO:0001882,GO:0001883,GO:0003674,GO:0003824,GO:0003924,GO:0005488,GO:0005515,GO:0005525,GO:0005575,GO:0005622,GO:0005623,GO:0005737,GO:0005739,GO:0005759,GO:0006725,GO:0006766,GO:0006767,GO:0006807,GO:0008150,GO:0008152,GO:0009235,GO:0009987,GO:0016462,GO:0016787,GO:0016817,GO:0016818,GO:0017076,GO:0017111,GO:0017144,GO:0019001,GO:0031974,GO:0032549,GO:0032550,GO:0032553,GO:0032555,GO:…	-	ko:K07588	-	-	-	-	ko00000,ko01000	-	-	-	ArgK
LEUER_T0000175	znf827	8496.XP_006268592.1	0.0	1146.0	KOG1721@1|root,KOG1721@2759|Eukaryota,38BH7@33154|Opisthokonta,3B9VQ@33208|Metazoa,3CV2S@33213|Bilateria,48A9A@7711|Chordata,48VU7@7742|Vertebrata	33208|Metazoa	S	Zinc finger protein 827	ZNF827	-	-	-	-	-	-	-	-	-	-	-	zf-C2H2,zf-H2C2_5
LEUER_T0000176	znf827	8496.XP_006268592.1	1.93e-315	925.0	KOG1721@1|root,KOG1721@2759|Eukaryota,38BH7@33154|Opisthokonta,3B9VQ@33208|Metazoa,3CV2S@33213|Bilateria,48A9A@7711|Chordata,48VU7@7742|Vertebrata	33208|Metazoa	S	Zinc finger protein 827	ZNF827	-	-	-	-	-	-	-	-	-	-	-	zf-C2H2,zf-H2C2_5
LEUER_T0000177	znf827	9258.ENSOANP00000010427	6.66e-306	892.0	KOG1721@1|root,KOG1721@2759|Eukaryota,38BH7@33154|Opisthokonta,3B9VQ@33208|Metazoa,3CV2S@33213|Bilateria,48A9A@7711|Chordata,48VU7@7742|Vertebrata,3J450@40674|Mammalia	33208|Metazoa	K	Zinc finger protein 827	ZNF827	-	-	-	-	-	-	-	-	-	-	-	zf-C2H2,zf-H2C2_5
LEUER_T0000180	otud4	9601.ENSPPYP00000004744	1.25e-32	140.0	KOG2605@1|root,KOG2605@2759|Eukaryota,38DPA@33154|Opisthokonta,3BAD4@33208|Metazoa,3D1IX@33213|Bilateria,488GN@7711|Chordata,48WFA@7742|Vertebrata,3J1JC@40674|Mammalia,35C5G@314146|Euarchontoglires,4MECW@9443|Primates,4MWHR@9604|Hominidae	33208|Metazoa	OT	OTU-like cysteine protease	OTUD4	GO:0000003,GO:0003006,GO:0003674,GO:0003824,GO:0004843,GO:0005575,GO:0005622,GO:0005623,GO:0005737,GO:0006275,GO:0006464,GO:0006508,GO:0006807,GO:0007275,GO:0007276,GO:0007281,GO:0007292,GO:0007530,GO:0007538,GO:0007542,GO:0008150,GO:0008152,GO:0008233,GO:0008234,GO:0009889,GO:0009891,GO:0009893,GO:0009987,GO:0010556,GO:0010557,GO:0010564,GO:0010604,GO:0016579,GO:0016787,GO:0018992,GO:0019099,GO:…	3.4.19.12	ko:K13718	-	-	-	-	ko00000,ko01000,ko01002	-	-	-	OTU
LEUER_T0000182	abce1	59538.XP_005975468.1	0.0	1142.0	COG1245@1|root,KOG0063@2759|Eukaryota,38BGA@33154|Opisthokonta,3BCRT@33208|Metazoa,3CVEM@33213|Bilateria,47Z6M@7711|Chordata,48Z8Z@7742|Vertebrata,3J3XG@40674|Mammalia,4J081@91561|Cetartiodactyla	33208|Metazoa	A	cassette subfamily E member 1	ABCE1	GO:0000054,GO:0000166,GO:0000956,GO:0001558,GO:0001959,GO:0002682,GO:0003674,GO:0004857,GO:0005488,GO:0005506,GO:0005515,GO:0005524,GO:0005575,GO:0005622,GO:0005623,GO:0005737,GO:0005739,GO:0005759,GO:0005829,GO:0006139,GO:0006401,GO:0006402,GO:0006403,GO:0006405,GO:0006412,GO:0006413,GO:0006415,GO:0006518,GO:0006611,GO:0006725,GO:0006807,GO:0006810,GO:0006886,GO:0006913,GO:0006996,GO:0008104,GO:…	-	ko:K06174	-	-	-	-	ko00000,ko03009	-	-	-	ABC_tran,Fer4,RLI
LEUER_T0000181	abce1	59538.XP_005975468.1	0.0	1142.0	COG1245@1|root,KOG0063@2759|Eukaryota,38BGA@33154|Opisthokonta,3BCRT@33208|Metazoa,3CVEM@33213|Bilateria,47Z6M@7711|Chordata,48Z8Z@7742|Vertebrata,3J3XG@40674|Mammalia,4J081@91561|Cetartiodactyla	33208|Metazoa	A	cassette subfamily E member 1	ABCE1	GO:0000054,GO:0000166,GO:0000956,GO:0001558,GO:0001959,GO:0002682,GO:0003674,GO:0004857,GO:0005488,GO:0005506,GO:0005515,GO:0005524,GO:0005575,GO:0005622,GO:0005623,GO:0005737,GO:0005739,GO:0005759,GO:0005829,GO:0006139,GO:0006401,GO:0006402,GO:0006403,GO:0006405,GO:0006412,GO:0006413,GO:0006415,GO:0006518,GO:0006611,GO:0006725,GO:0006807,GO:0006810,GO:0006886,GO:0006913,GO:0006996,GO:0008104,GO:…	-	ko:K06174	-	-	-	-	ko00000,ko03009	-	-	-	ABC_tran,Fer4,RLI
LEUER_T0000183	anapc10	176946.XP_007428691.1	1.23e-130	370.0	COG5156@1|root,KOG3437@2759|Eukaryota,38GXC@33154|Opisthokonta,3BEWI@33208|Metazoa,3CXTM@33213|Bilateria,4839X@7711|Chordata,48ZT8@7742|Vertebrata	33208|Metazoa	DO	positive regulation of ubiquitin protein ligase activity	ANAPC10	GO:0000151,GO:0000152,GO:0000209,GO:0000278,GO:0003674,GO:0003824,GO:0004842,GO:0005575,GO:0005622,GO:0005623,GO:0005634,GO:0005654,GO:0005680,GO:0005737,GO:0005829,GO:0006464,GO:0006508,GO:0006511,GO:0006807,GO:0007049,GO:0007113,GO:0008150,GO:0008152,GO:0009056,GO:0009057,GO:0009893,GO:0009987,GO:0010498,GO:0010604,GO:0016567,GO:0016740,GO:0019222,GO:0019538,GO:0019787,GO:0019941,GO:0030163,GO:…	-	ko:K03357	ko04110,ko04111,ko04113,ko04114,ko04120,ko04914,ko05166,map04110,map04111,map04113,map04114,map04120,map04914,map05166	M00389	-	-	ko00000,ko00001,ko00002,ko03036,ko04121	-	-	-	ANAPC10
LEUER_T0000184	hhip	13616.ENSMODP00000000517	0.0	983.0	KOG4295@1|root,KOG4295@2759|Eukaryota,38D30@33154|Opisthokonta,3BG07@33208|Metazoa,3CS40@33213|Bilateria,47ZRD@7711|Chordata,48XQ8@7742|Vertebrata,3JCC6@40674|Mammalia,4JWTY@9263|Metatheria	33208|Metazoa	T	Hedgehog interacting protein	HHIP	GO:0001501,GO:0001763,GO:0002009,GO:0003002,GO:0003674,GO:0005488,GO:0005515,GO:0005575,GO:0005622,GO:0005623,GO:0005634,GO:0005737,GO:0005886,GO:0005887,GO:0005929,GO:0007154,GO:0007165,GO:0007166,GO:0007224,GO:0007275,GO:0007389,GO:0007399,GO:0007405,GO:0008150,GO:0008270,GO:0008283,GO:0008589,GO:0009653,GO:0009887,GO:0009888,GO:0009953,GO:0009966,GO:0009968,GO:0009986,GO:0009987,GO:0010646,GO:…	-	ko:K06231	ko04024,ko04340,ko05200,ko05217,map04024,map04340,map05200,map05217	-	-	-	ko00000,ko00001	-	-	-	EGF_2,Folate_rec,GSDH
LEUER_T0000185	hhip	13616.ENSMODP00000000517	0.0	983.0	KOG4295@1|root,KOG4295@2759|Eukaryota,38D30@33154|Opisthokonta,3BG07@33208|Metazoa,3CS40@33213|Bilateria,47ZRD@7711|Chordata,48XQ8@7742|Vertebrata,3JCC6@40674|Mammalia,4JWTY@9263|Metatheria	33208|Metazoa	T	Hedgehog interacting protein	HHIP	GO:0001501,GO:0001763,GO:0002009,GO:0003002,GO:0003674,GO:0005488,GO:0005515,GO:0005575,GO:0005622,GO:0005623,GO:0005634,GO:0005737,GO:0005886,GO:0005887,GO:0005929,GO:0007154,GO:0007165,GO:0007166,GO:0007224,GO:0007275,GO:0007389,GO:0007399,GO:0007405,GO:0008150,GO:0008270,GO:0008283,GO:0008589,GO:0009653,GO:0009887,GO:0009888,GO:0009953,GO:0009966,GO:0009968,GO:0009986,GO:0009987,GO:0010646,GO:…	-	ko:K06231	ko04024,ko04340,ko05200,ko05217,map04024,map04340,map05200,map05217	-	-	-	ko00000,ko00001	-	-	-	EGF_2,Folate_rec,GSDH
LEUER_T0000186	hhip	13616.ENSMODP00000000517	0.0	984.0	KOG4295@1|root,KOG4295@2759|Eukaryota,38D30@33154|Opisthokonta,3BG07@33208|Metazoa,3CS40@33213|Bilateria,47ZRD@7711|Chordata,48XQ8@7742|Vertebrata,3JCC6@40674|Mammalia,4JWTY@9263|Metatheria	33208|Metazoa	T	Hedgehog interacting protein	HHIP	GO:0001501,GO:0001763,GO:0002009,GO:0003002,GO:0003674,GO:0005488,GO:0005515,GO:0005575,GO:0005622,GO:0005623,GO:0005634,GO:0005737,GO:0005886,GO:0005887,GO:0005929,GO:0007154,GO:0007165,GO:0007166,GO:0007224,GO:0007275,GO:0007389,GO:0007399,GO:0007405,GO:0008150,GO:0008270,GO:0008283,GO:0008589,GO:0009653,GO:0009887,GO:0009888,GO:0009953,GO:0009966,GO:0009968,GO:0009986,GO:0009987,GO:0010646,GO:…	-	ko:K06231	ko04024,ko04340,ko05200,ko05217,map04024,map04340,map05200,map05217	-	-	-	ko00000,ko00001	-	-	-	EGF_2,Folate_rec,GSDH
LEUER_T0000187	hhip	13616.ENSMODP00000000517	0.0	983.0	KOG4295@1|root,KOG4295@2759|Eukaryota,38D30@33154|Opisthokonta,3BG07@33208|Metazoa,3CS40@33213|Bilateria,47ZRD@7711|Chordata,48XQ8@7742|Vertebrata,3JCC6@40674|Mammalia,4JWTY@9263|Metatheria	33208|Metazoa	T	Hedgehog interacting protein	HHIP	GO:0001501,GO:0001763,GO:0002009,GO:0003002,GO:0003674,GO:0005488,GO:0005515,GO:0005575,GO:0005622,GO:0005623,GO:0005634,GO:0005737,GO:0005886,GO:0005887,GO:0005929,GO:0007154,GO:0007165,GO:0007166,GO:0007224,GO:0007275,GO:0007389,GO:0007399,GO:0007405,GO:0008150,GO:0008270,GO:0008283,GO:0008589,GO:0009653,GO:0009887,GO:0009888,GO:0009953,GO:0009966,GO:0009968,GO:0009986,GO:0009987,GO:0010646,GO:…	-	ko:K06231	ko04024,ko04340,ko05200,ko05217,map04024,map04340,map05200,map05217	-	-	-	ko00000,ko00001	-	-	-	EGF_2,Folate_rec,GSDH
LEUER_T0000189	frem3	7897.ENSLACP00000001939	0.0	4794.0	KOG1306@1|root,KOG3597@1|root,KOG1306@2759|Eukaryota,KOG3597@2759|Eukaryota,396BZ@33154|Opisthokonta,3BDF1@33208|Metazoa,3CT7W@33213|Bilateria,486SC@7711|Chordata,494KV@7742|Vertebrata	33208|Metazoa	PT	Extracellular matrix protein	frem3	-	-	-	-	-	-	-	-	-	-	-	Cadherin_3,Calx-beta
LEUER_T0000190	marchf1	9365.XP_007530433.1	1.07e-156	445.0	COG5183@1|root,KOG1609@2759|Eukaryota,38EEN@33154|Opisthokonta,3B9Y7@33208|Metazoa,3CWBN@33213|Bilateria,480VT@7711|Chordata,48ZQV@7742|Vertebrata,3J1WX@40674|Mammalia	33208|Metazoa	A	MHC protein binding	MARCH1	GO:0000139,GO:0000209,GO:0000323,GO:0002376,GO:0002495,GO:0002504,GO:0003674,GO:0003824,GO:0004842,GO:0005102,GO:0005488,GO:0005515,GO:0005575,GO:0005622,GO:0005623,GO:0005737,GO:0005764,GO:0005765,GO:0005768,GO:0005769,GO:0005770,GO:0005773,GO:0005774,GO:0005783,GO:0005789,GO:0005794,GO:0005802,GO:0005886,GO:0006464,GO:0006807,GO:0006955,GO:0008150,GO:0008152,GO:0008270,GO:0009987,GO:0010008,GO:…	2.3.2.27	ko:K10656	-	-	-	-	ko00000,ko01000,ko04121	-	-	-	RINGv
LEUER_T0000191	marchf1	128390.XP_009473046.1	1.47e-153	436.0	COG5183@1|root,KOG1609@2759|Eukaryota,38EEN@33154|Opisthokonta,3B9Y7@33208|Metazoa,3CWBN@33213|Bilateria,480VT@7711|Chordata,48ZQV@7742|Vertebrata,4GK2E@8782|Aves	33208|Metazoa	A	E3 ubiquitin-protein ligase MARCH1	MARCH1	GO:0000139,GO:0000209,GO:0000323,GO:0002376,GO:0002495,GO:0002504,GO:0003674,GO:0003824,GO:0004842,GO:0005102,GO:0005488,GO:0005515,GO:0005575,GO:0005622,GO:0005623,GO:0005737,GO:0005764,GO:0005765,GO:0005768,GO:0005769,GO:0005770,GO:0005773,GO:0005774,GO:0005783,GO:0005789,GO:0005794,GO:0005802,GO:0005886,GO:0006464,GO:0006807,GO:0006955,GO:0008150,GO:0008152,GO:0008270,GO:0009987,GO:0010008,GO:…	2.3.2.27	ko:K10656	-	-	-	-	ko00000,ko01000,ko04121	-	-	-	RINGv
LEUER_T0000192	marchf1	128390.XP_009473046.1	8.63e-154	438.0	COG5183@1|root,KOG1609@2759|Eukaryota,38EEN@33154|Opisthokonta,3B9Y7@33208|Metazoa,3CWBN@33213|Bilateria,480VT@7711|Chordata,48ZQV@7742|Vertebrata,4GK2E@8782|Aves	33208|Metazoa	A	E3 ubiquitin-protein ligase MARCH1	MARCH1	GO:0000139,GO:0000209,GO:0000323,GO:0002376,GO:0002495,GO:0002504,GO:0003674,GO:0003824,GO:0004842,GO:0005102,GO:0005488,GO:0005515,GO:0005575,GO:0005622,GO:0005623,GO:0005737,GO:0005764,GO:0005765,GO:0005768,GO:0005769,GO:0005770,GO:0005773,GO:0005774,GO:0005783,GO:0005789,GO:0005794,GO:0005802,GO:0005886,GO:0006464,GO:0006807,GO:0006955,GO:0008150,GO:0008152,GO:0008270,GO:0009987,GO:0010008,GO:…	2.3.2.27	ko:K10656	-	-	-	-	ko00000,ko01000,ko04121	-	-	-	RINGv
LEUER_T0000193	marchf1	8479.XP_005299333.1	3.02e-131	392.0	COG5183@1|root,KOG1609@2759|Eukaryota,38EEN@33154|Opisthokonta,3B9Y7@33208|Metazoa,3CWBN@33213|Bilateria,480VT@7711|Chordata,48ZQV@7742|Vertebrata,4CJWM@8459|Testudines	33208|Metazoa	A	Membrane associated ring-CH-type finger 1	MARCH1	GO:0000139,GO:0000209,GO:0000323,GO:0002376,GO:0002495,GO:0002504,GO:0003674,GO:0003824,GO:0004842,GO:0005102,GO:0005488,GO:0005515,GO:0005575,GO:0005622,GO:0005623,GO:0005737,GO:0005764,GO:0005765,GO:0005768,GO:0005769,GO:0005770,GO:0005773,GO:0005774,GO:0005783,GO:0005789,GO:0005794,GO:0005802,GO:0005886,GO:0006464,GO:0006807,GO:0006955,GO:0008150,GO:0008152,GO:0008270,GO:0009987,GO:0010008,GO:…	2.3.2.27	ko:K10656	-	-	-	-	ko00000,ko01000,ko04121	-	-	-	RINGv
LEUER_T0000194	tma16	8479.XP_005299332.1	3.43e-75	234.0	2CB2V@1|root,2RXYZ@2759|Eukaryota,39VZI@33154|Opisthokonta,3BNIV@33208|Metazoa,3D4JI@33213|Bilateria,483ZK@7711|Chordata,496PV@7742|Vertebrata,4C9TG@8459|Testudines	33208|Metazoa	S	Translation machinery-associated protein 16	TMA16	GO:0005575,GO:0005622,GO:0005623,GO:0005634,GO:0005730,GO:0031974,GO:0031981,GO:0043226,GO:0043227,GO:0043228,GO:0043229,GO:0043231,GO:0043232,GO:0043233,GO:0044422,GO:0044424,GO:0044428,GO:0044446,GO:0044464,GO:0070013	-	ko:K14860	-	-	-	-	ko00000,ko03009	-	-	-	Tma16
LEUER_T0000195	npy5r	8364.ENSXETP00000010624	3.4e-188	538.0	KOG3656@1|root,KOG3656@2759|Eukaryota,38F75@33154|Opisthokonta,3BI7A@33208|Metazoa,3D1BG@33213|Bilateria,484JU@7711|Chordata,48ZET@7742|Vertebrata	33208|Metazoa	T	pancreatic polypeptide receptor activity	NPY5R	GO:0000003,GO:0001601,GO:0001602,GO:0001653,GO:0001932,GO:0001934,GO:0002673,GO:0002674,GO:0002675,GO:0002682,GO:0002683,GO:0002861,GO:0002862,GO:0002864,GO:0002865,GO:0003007,GO:0003008,GO:0003013,GO:0003151,GO:0003205,GO:0003206,GO:0003208,GO:0003214,GO:0003231,GO:0003674,GO:0004888,GO:0004930,GO:0004983,GO:0005575,GO:0005622,GO:0005623,GO:0005737,GO:0005886,GO:0005887,GO:0007154,GO:0007165,GO:…	-	ko:K04207	ko04080,map04080	-	-	-	ko00000,ko00001,ko04030	-	-	-	7tm_1
LEUER_T0000196	npy1r	7897.ENSLACP00000010970	5.44e-186	526.0	KOG3656@1|root,KOG3656@2759|Eukaryota,38HKK@33154|Opisthokonta,3BAX7@33208|Metazoa,3CXQH@33213|Bilateria,4805C@7711|Chordata,48V0X@7742|Vertebrata	33208|Metazoa	T	Belongs to the G-protein coupled receptor 1 family	NPY1R	GO:0001601,GO:0001602,GO:0001653,GO:0003007,GO:0003008,GO:0003012,GO:0003013,GO:0003018,GO:0003151,GO:0003674,GO:0004888,GO:0004930,GO:0004983,GO:0004995,GO:0005575,GO:0005622,GO:0005623,GO:0005737,GO:0005829,GO:0005886,GO:0005887,GO:0005975,GO:0005996,GO:0006006,GO:0006873,GO:0006874,GO:0006875,GO:0006936,GO:0006937,GO:0006939,GO:0007154,GO:0007165,GO:0007186,GO:0007187,GO:0007188,GO:0007193,GO:…	-	ko:K04204,ko:K04206,ko:K04208,ko:K04209,ko:K04217,ko:K04221,ko:K04230	ko04024,ko04080,ko04923,map04024,map04080,map04923	-	-	-	ko00000,ko00001,ko04030	-	-	-	7tm_1
LEUER_T0000197	naf1	51337.XP_004669726.1	1.39e-59	218.0	KOG2236@1|root,KOG2236@2759|Eukaryota,38EWH@33154|Opisthokonta,3BKTT@33208|Metazoa,3D140@33213|Bilateria,485N0@7711|Chordata,491YH@7742|Vertebrata,3J5W9@40674|Mammalia,35G7D@314146|Euarchontoglires,4Q2QX@9989|Rodentia	33208|Metazoa	S	H ACA ribonucleoprotein complex non-core subunit NAF1	NAF1	GO:0000154,GO:0000454,GO:0000491,GO:0000493,GO:0001522,GO:0003674,GO:0003676,GO:0003723,GO:0005488,GO:0005575,GO:0005622,GO:0005623,GO:0005634,GO:0005732,GO:0005737,GO:0006139,GO:0006364,GO:0006396,GO:0006725,GO:0006807,GO:0008150,GO:0008152,GO:0009451,GO:0009889,GO:0009891,GO:0009892,GO:0009893,GO:0009894,GO:0009895,GO:0009987,GO:0010467,GO:0010468,GO:0010556,GO:0010557,GO:0010604,GO:0010605,GO:…	-	ko:K14763	-	-	-	-	ko00000,ko03009	-	-	-	Gar1
LEUER_T0000198	fstl5	8469.XP_007071347.1	0.0	1427.0	28HAA@1|root,2QPNV@2759|Eukaryota,38CRC@33154|Opisthokonta,3BAQJ@33208|Metazoa,3CYF5@33213|Bilateria,48447@7711|Chordata,490JC@7742|Vertebrata,4CEG5@8459|Testudines	33208|Metazoa	T	Kazal type serine protease inhibitors	FSTL5	-	-	-	-	-	-	-	-	-	-	-	I-set,Ig_3,Kazal_1,Kazal_2
LEUER_T0000199	fstl5	13735.ENSPSIP00000006985	0.0	1400.0	28HAA@1|root,2QPNV@2759|Eukaryota,38CRC@33154|Opisthokonta,3BAQJ@33208|Metazoa,3CYF5@33213|Bilateria,48447@7711|Chordata,490JC@7742|Vertebrata,4CEG5@8459|Testudines	33208|Metazoa	T	Kazal type serine protease inhibitors	FSTL5	-	-	-	-	-	-	-	-	-	-	-	I-set,Ig_3,Kazal_1,Kazal_2
LEUER_T0000200	rapgef2	9031.ENSGALP00000015407	0.0	2293.0	KOG3629@1|root,KOG3542@2759|Eukaryota,38F50@33154|Opisthokonta,3B985@33208|Metazoa,3CV99@33213|Bilateria,487BU@7711|Chordata,48ZQW@7742|Vertebrata,4GK0P@8782|Aves	33208|Metazoa	T	Rap guanine nucleotide exchange factor	RAPGEF2	GO:0000003,GO:0000165,GO:0000166,GO:0001568,GO:0001654,GO:0001664,GO:0001700,GO:0001764,GO:0001885,GO:0001932,GO:0001934,GO:0001944,GO:0002009,GO:0002064,GO:0002165,GO:0002376,GO:0002520,GO:0003006,GO:0003158,GO:0003674,GO:0005085,GO:0005088,GO:0005096,GO:0005102,GO:0005488,GO:0005509,GO:0005515,GO:0005543,GO:0005575,GO:0005622,GO:0005623,GO:0005737,GO:0005768,GO:0005770,GO:0005829,GO:0005886,GO:…	-	ko:K08018,ko:K08020	ko04010,ko04015,ko04530,map04010,map04015,map04530	-	-	-	ko00000,ko00001	-	-	-	PDZ,RA,RasGEF,RasGEF_N
LEUER_T0000201	rapgef2	8469.XP_007071344.1	0.0	2325.0	KOG3629@1|root,KOG3542@2759|Eukaryota,38F50@33154|Opisthokonta,3B985@33208|Metazoa,3CV99@33213|Bilateria,487BU@7711|Chordata,48ZQW@7742|Vertebrata,4CB89@8459|Testudines	33208|Metazoa	T	Rap guanine nucleotide exchange factor	RAPGEF2	GO:0000003,GO:0000165,GO:0000166,GO:0001568,GO:0001654,GO:0001664,GO:0001700,GO:0001764,GO:0001885,GO:0001932,GO:0001934,GO:0001944,GO:0002009,GO:0002064,GO:0002165,GO:0002376,GO:0002520,GO:0003006,GO:0003158,GO:0003674,GO:0005085,GO:0005088,GO:0005096,GO:0005102,GO:0005488,GO:0005509,GO:0005515,GO:0005543,GO:0005575,GO:0005622,GO:0005623,GO:0005737,GO:0005768,GO:0005770,GO:0005829,GO:0005886,GO:…	-	ko:K08018,ko:K08020	ko04010,ko04015,ko04530,map04010,map04015,map04530	-	-	-	ko00000,ko00001	-	-	-	PDZ,RA,RasGEF,RasGEF_N
LEUER_T0000202	rapgef2	8469.XP_007071344.1	0.0	2316.0	KOG3629@1|root,KOG3542@2759|Eukaryota,38F50@33154|Opisthokonta,3B985@33208|Metazoa,3CV99@33213|Bilateria,487BU@7711|Chordata,48ZQW@7742|Vertebrata,4CB89@8459|Testudines	33208|Metazoa	T	Rap guanine nucleotide exchange factor	RAPGEF2	GO:0000003,GO:0000165,GO:0000166,GO:0001568,GO:0001654,GO:0001664,GO:0001700,GO:0001764,GO:0001885,GO:0001932,GO:0001934,GO:0001944,GO:0002009,GO:0002064,GO:0002165,GO:0002376,GO:0002520,GO:0003006,GO:0003158,GO:0003674,GO:0005085,GO:0005088,GO:0005096,GO:0005102,GO:0005488,GO:0005509,GO:0005515,GO:0005543,GO:0005575,GO:0005622,GO:0005623,GO:0005737,GO:0005768,GO:0005770,GO:0005829,GO:0005886,GO:…	-	ko:K08018,ko:K08020	ko04010,ko04015,ko04530,map04010,map04015,map04530	-	-	-	ko00000,ko00001	-	-	-	PDZ,RA,RasGEF,RasGEF_N
LEUER_T0000203	LOC116977448	89462.XP_006073953.1	4.18e-206	616.0	KOG3629@1|root,KOG3542@2759|Eukaryota,38F50@33154|Opisthokonta,3B985@33208|Metazoa,3CV99@33213|Bilateria,487BU@7711|Chordata,48ZQW@7742|Vertebrata,3J4I0@40674|Mammalia,4J7U0@91561|Cetartiodactyla	33208|Metazoa	T	Rap guanine nucleotide exchange factor	RAPGEF2	GO:0000003,GO:0000165,GO:0000166,GO:0001568,GO:0001654,GO:0001664,GO:0001700,GO:0001764,GO:0001885,GO:0001932,GO:0001934,GO:0001944,GO:0002009,GO:0002064,GO:0002165,GO:0002376,GO:0002520,GO:0003006,GO:0003158,GO:0003674,GO:0005085,GO:0005088,GO:0005096,GO:0005102,GO:0005488,GO:0005509,GO:0005515,GO:0005543,GO:0005575,GO:0005622,GO:0005623,GO:0005737,GO:0005768,GO:0005770,GO:0005829,GO:0005886,GO:…	-	ko:K08018	ko04010,ko04015,ko04530,map04010,map04015,map04530	-	-	-	ko00000,ko00001	-	-	-	PDZ,RA,RasGEF,RasGEF_N
LEUER_T0000204	c1h4orf45	7897.ENSLACP00000023433	2.6e-34	126.0	2CGZM@1|root,2S3MZ@2759|Eukaryota,3A4ZC@33154|Opisthokonta,3BTRG@33208|Metazoa,3E4II@33213|Bilateria,48R81@7711|Chordata,49D9J@7742|Vertebrata	33208|Metazoa	S	Domain of unknown function (DUF4562)	C4orf45	-	-	-	-	-	-	-	-	-	-	-	DUF4562
LEUER_T0000209	fnip2	181119.XP_005517650.1	1.15e-310	894.0	KOG3693@1|root,KOG3693@2759|Eukaryota,38D64@33154|Opisthokonta,3BBWT@33208|Metazoa,3CRBC@33213|Bilateria,483KH@7711|Chordata,48W1D@7742|Vertebrata,4GN0E@8782|Aves	33208|Metazoa	S	Folliculin-interacting protein 2	FNIP2	GO:0000122,GO:0001932,GO:0001934,GO:0003674,GO:0004857,GO:0005488,GO:0005515,GO:0005575,GO:0005622,GO:0005623,GO:0005737,GO:0006355,GO:0006357,GO:0006464,GO:0006468,GO:0006793,GO:0006796,GO:0006807,GO:0006915,GO:0006950,GO:0006974,GO:0006996,GO:0007005,GO:0007154,GO:0007165,GO:0008150,GO:0008152,GO:0008219,GO:0008630,GO:0009889,GO:0009890,GO:0009892,GO:0009893,GO:0009987,GO:0010468,GO:0010556,GO:…	-	ko:K20400,ko:K20401	ko04150,map04150	-	-	-	ko00000,ko00001	-	-	-	FNIP_C,FNIP_M,FNIP_N
LEUER_T0000208	fnip2	8479.XP_008167609.1	0.0	1057.0	KOG3693@1|root,KOG3693@2759|Eukaryota,38D64@33154|Opisthokonta,3BBWT@33208|Metazoa,3CRBC@33213|Bilateria,483KH@7711|Chordata,48W1D@7742|Vertebrata,4CFK1@8459|Testudines	33208|Metazoa	S	Folliculin interacting protein 2	FNIP2	GO:0000122,GO:0001932,GO:0001934,GO:0003674,GO:0004857,GO:0005488,GO:0005515,GO:0005575,GO:0005622,GO:0005623,GO:0005737,GO:0006355,GO:0006357,GO:0006464,GO:0006468,GO:0006793,GO:0006796,GO:0006807,GO:0006915,GO:0006950,GO:0006974,GO:0006996,GO:0007005,GO:0007154,GO:0007165,GO:0008150,GO:0008152,GO:0008219,GO:0008630,GO:0009889,GO:0009890,GO:0009892,GO:0009893,GO:0009987,GO:0010468,GO:0010556,GO:…	-	ko:K20400,ko:K20401	ko04150,map04150	-	-	-	ko00000,ko00001	-	-	-	FNIP_C,FNIP_M,FNIP_N
LEUER_T0000205	fnip2	7918.ENSLOCP00000009775	0.0	1130.0	KOG3693@1|root,KOG3693@2759|Eukaryota,38D64@33154|Opisthokonta,3BBWT@33208|Metazoa,3CRBC@33213|Bilateria,483KH@7711|Chordata,48W1D@7742|Vertebrata,4A8J1@7898|Actinopterygii	33208|Metazoa	S	Folliculin interacting protein	FNIP2	GO:0000122,GO:0001932,GO:0001934,GO:0003674,GO:0004857,GO:0005488,GO:0005515,GO:0005575,GO:0005622,GO:0005623,GO:0005737,GO:0006355,GO:0006357,GO:0006464,GO:0006468,GO:0006793,GO:0006796,GO:0006807,GO:0006915,GO:0006950,GO:0006974,GO:0006996,GO:0007005,GO:0007154,GO:0007165,GO:0008150,GO:0008152,GO:0008219,GO:0008630,GO:0009889,GO:0009890,GO:0009892,GO:0009893,GO:0009987,GO:0010468,GO:0010556,GO:…	-	ko:K20401	ko04150,map04150	-	-	-	ko00000,ko00001	-	-	-	FNIP_C,FNIP_M,FNIP_N
LEUER_T0000206	fnip2	181119.XP_005517650.1	0.0	1108.0	KOG3693@1|root,KOG3693@2759|Eukaryota,38D64@33154|Opisthokonta,3BBWT@33208|Metazoa,3CRBC@33213|Bilateria,483KH@7711|Chordata,48W1D@7742|Vertebrata,4GN0E@8782|Aves	33208|Metazoa	S	Folliculin-interacting protein 2	FNIP2	GO:0000122,GO:0001932,GO:0001934,GO:0003674,GO:0004857,GO:0005488,GO:0005515,GO:0005575,GO:0005622,GO:0005623,GO:0005737,GO:0006355,GO:0006357,GO:0006464,GO:0006468,GO:0006793,GO:0006796,GO:0006807,GO:0006915,GO:0006950,GO:0006974,GO:0006996,GO:0007005,GO:0007154,GO:0007165,GO:0008150,GO:0008152,GO:0008219,GO:0008630,GO:0009889,GO:0009890,GO:0009892,GO:0009893,GO:0009987,GO:0010468,GO:0010556,GO:…	-	ko:K20400,ko:K20401	ko04150,map04150	-	-	-	ko00000,ko00001	-	-	-	FNIP_C,FNIP_M,FNIP_N
LEUER_T0000207	fnip2	7918.ENSLOCP00000009775	0.0	1045.0	KOG3693@1|root,KOG3693@2759|Eukaryota,38D64@33154|Opisthokonta,3BBWT@33208|Metazoa,3CRBC@33213|Bilateria,483KH@7711|Chordata,48W1D@7742|Vertebrata,4A8J1@7898|Actinopterygii	33208|Metazoa	S	Folliculin interacting protein	FNIP2	GO:0000122,GO:0001932,GO:0001934,GO:0003674,GO:0004857,GO:0005488,GO:0005515,GO:0005575,GO:0005622,GO:0005623,GO:0005737,GO:0006355,GO:0006357,GO:0006464,GO:0006468,GO:0006793,GO:0006796,GO:0006807,GO:0006915,GO:0006950,GO:0006974,GO:0006996,GO:0007005,GO:0007154,GO:0007165,GO:0008150,GO:0008152,GO:0008219,GO:0008630,GO:0009889,GO:0009890,GO:0009892,GO:0009893,GO:0009987,GO:0010468,GO:0010556,GO:…	-	ko:K20401	ko04150,map04150	-	-	-	ko00000,ko00001	-	-	-	FNIP_C,FNIP_M,FNIP_N
LEUER_T0000210	fnip2	7918.ENSLOCP00000009775	2.77e-305	884.0	KOG3693@1|root,KOG3693@2759|Eukaryota,38D64@33154|Opisthokonta,3BBWT@33208|Metazoa,3CRBC@33213|Bilateria,483KH@7711|Chordata,48W1D@7742|Vertebrata,4A8J1@7898|Actinopterygii	33208|Metazoa	S	Folliculin interacting protein	FNIP2	GO:0000122,GO:0001932,GO:0001934,GO:0003674,GO:0004857,GO:0005488,GO:0005515,GO:0005575,GO:0005622,GO:0005623,GO:0005737,GO:0006355,GO:0006357,GO:0006464,GO:0006468,GO:0006793,GO:0006796,GO:0006807,GO:0006915,GO:0006950,GO:0006974,GO:0006996,GO:0007005,GO:0007154,GO:0007165,GO:0008150,GO:0008152,GO:0008219,GO:0008630,GO:0009889,GO:0009890,GO:0009892,GO:0009893,GO:0009987,GO:0010468,GO:0010556,GO:…	-	ko:K20401	ko04150,map04150	-	-	-	ko00000,ko00001	-	-	-	FNIP_C,FNIP_M,FNIP_N
LEUER_T0000211	fnip2	7918.ENSLOCP00000009775	1.4e-293	853.0	KOG3693@1|root,KOG3693@2759|Eukaryota,38D64@33154|Opisthokonta,3BBWT@33208|Metazoa,3CRBC@33213|Bilateria,483KH@7711|Chordata,48W1D@7742|Vertebrata,4A8J1@7898|Actinopterygii	33208|Metazoa	S	Folliculin interacting protein	FNIP2	GO:0000122,GO:0001932,GO:0001934,GO:0003674,GO:0004857,GO:0005488,GO:0005515,GO:0005575,GO:0005622,GO:0005623,GO:0005737,GO:0006355,GO:0006357,GO:0006464,GO:0006468,GO:0006793,GO:0006796,GO:0006807,GO:0006915,GO:0006950,GO:0006974,GO:0006996,GO:0007005,GO:0007154,GO:0007165,GO:0008150,GO:0008152,GO:0008219,GO:0008630,GO:0009889,GO:0009890,GO:0009892,GO:0009893,GO:0009987,GO:0010468,GO:0010556,GO:…	-	ko:K20401	ko04150,map04150	-	-	-	ko00000,ko00001	-	-	-	FNIP_C,FNIP_M,FNIP_N
LEUER_T0000212	ppid	89462.XP_006073967.1	3.95e-197	554.0	COG0652@1|root,KOG0546@2759|Eukaryota,38D8M@33154|Opisthokonta,3B9VI@33208|Metazoa,3CWEB@33213|Bilateria,47YXU@7711|Chordata,48VNN@7742|Vertebrata,3JE35@40674|Mammalia,4J11B@91561|Cetartiodactyla	33208|Metazoa	O	Peptidyl-prolyl cis-trans isomerase	PPID	GO:0000122,GO:0000413,GO:0002791,GO:0002793,GO:0003674,GO:0003755,GO:0003824,GO:0005102,GO:0005488,GO:0005515,GO:0005527,GO:0005528,GO:0005575,GO:0005622,GO:0005623,GO:0005634,GO:0005654,GO:0005730,GO:0005737,GO:0005739,GO:0005829,GO:0006355,GO:0006357,GO:0006457,GO:0006464,GO:0006807,GO:0006950,GO:0006979,GO:0006996,GO:0008134,GO:0008144,GO:0008150,GO:0008152,GO:0009314,GO:0009411,GO:0009416,GO:…	2.3.1.234,5.2.1.8	ko:K01409,ko:K05864,ko:K09566	ko04217,ko04218,map04217,map04218	-	R10648	RC00070,RC00416	ko00000,ko00001,ko01000,ko03016,ko03041,ko03110	-	-	-	Pro_isomerase,TPR_2,TPR_7
LEUER_T0000213	etfdh	9478.XP_008050631.1	0.0	1020.0	COG2440@1|root,KOG2415@2759|Eukaryota,38H8R@33154|Opisthokonta,3BH2N@33208|Metazoa,3CWV6@33213|Bilateria,484PU@7711|Chordata,48WYX@7742|Vertebrata,3J1P9@40674|Mammalia,35HUW@314146|Euarchontoglires,4MEYC@9443|Primates	33208|Metazoa	C	electron-transferring-flavoprotein dehydrogenase activity	ETFDH	GO:0000166,GO:0003674,GO:0003824,GO:0004174,GO:0005488,GO:0005575,GO:0005622,GO:0005623,GO:0005737,GO:0005739,GO:0005740,GO:0005743,GO:0005759,GO:0006082,GO:0006091,GO:0006119,GO:0006139,GO:0006163,GO:0006629,GO:0006631,GO:0006635,GO:0006725,GO:0006753,GO:0006793,GO:0006796,GO:0006807,GO:0006950,GO:0006979,GO:0008150,GO:0008152,GO:0009055,GO:0009056,GO:0009062,GO:0009117,GO:0009123,GO:0009126,GO:…	1.5.5.1	ko:K00311	-	-	-	-	ko00000,ko01000	-	-	-	ETF_QO,FAD_binding_2,Thi4
LEUER_T0000214	c1h4orf46	8479.XP_005299360.1	5.92e-22	89.0	2ERPZ@1|root,2SUFC@2759|Eukaryota,3A2MU@33154|Opisthokonta,3BQQG@33208|Metazoa,3D82E@33213|Bilateria,48EUF@7711|Chordata,49BPC@7742|Vertebrata,4CMHD@8459|Testudines	33208|Metazoa	S	Renal cancer differentiation gene 1 protein	C4orf46	-	-	-	-	-	-	-	-	-	-	-	RCDG1
LEUER_T0000215	c1h4orf46	8479.XP_005299360.1	5.92e-22	89.0	2ERPZ@1|root,2SUFC@2759|Eukaryota,3A2MU@33154|Opisthokonta,3BQQG@33208|Metazoa,3D82E@33213|Bilateria,48EUF@7711|Chordata,49BPC@7742|Vertebrata,4CMHD@8459|Testudines	33208|Metazoa	S	Renal cancer differentiation gene 1 protein	C4orf46	-	-	-	-	-	-	-	-	-	-	-	RCDG1
LEUER_T0000220	tmem144	7897.ENSLACP00000014513	8.58e-186	526.0	28IPD@1|root,2QR0F@2759|Eukaryota,39S8J@33154|Opisthokonta,3BA2N@33208|Metazoa,3CVUY@33213|Bilateria,47YUX@7711|Chordata,496ZM@7742|Vertebrata	33208|Metazoa	S	carbohydrate transmembrane transporter activity	TMEM144	-	-	-	-	-	-	-	-	-	-	-	TMEM144
LEUER_T0000219	tmem144	7897.ENSLACP00000014513	8.58e-186	526.0	28IPD@1|root,2QR0F@2759|Eukaryota,39S8J@33154|Opisthokonta,3BA2N@33208|Metazoa,3CVUY@33213|Bilateria,47YUX@7711|Chordata,496ZM@7742|Vertebrata	33208|Metazoa	S	carbohydrate transmembrane transporter activity	TMEM144	-	-	-	-	-	-	-	-	-	-	-	TMEM144
LEUER_T0000218	tmem144	7897.ENSLACP00000014513	8.58e-186	526.0	28IPD@1|root,2QR0F@2759|Eukaryota,39S8J@33154|Opisthokonta,3BA2N@33208|Metazoa,3CVUY@33213|Bilateria,47YUX@7711|Chordata,496ZM@7742|Vertebrata	33208|Metazoa	S	carbohydrate transmembrane transporter activity	TMEM144	-	-	-	-	-	-	-	-	-	-	-	TMEM144
LEUER_T0000217	tmem144	7897.ENSLACP00000014513	2.67e-185	526.0	28IPD@1|root,2QR0F@2759|Eukaryota,39S8J@33154|Opisthokonta,3BA2N@33208|Metazoa,3CVUY@33213|Bilateria,47YUX@7711|Chordata,496ZM@7742|Vertebrata	33208|Metazoa	S	carbohydrate transmembrane transporter activity	TMEM144	-	-	-	-	-	-	-	-	-	-	-	TMEM144
LEUER_T0000216	tmem144	7897.ENSLACP00000014513	1.37e-184	526.0	28IPD@1|root,2QR0F@2759|Eukaryota,39S8J@33154|Opisthokonta,3BA2N@33208|Metazoa,3CVUY@33213|Bilateria,47YUX@7711|Chordata,496ZM@7742|Vertebrata	33208|Metazoa	S	carbohydrate transmembrane transporter activity	TMEM144	-	-	-	-	-	-	-	-	-	-	-	TMEM144
LEUER_T0000223	gask1b	9823.ENSSSCP00000009465	2.1e-178	518.0	2CEI0@1|root,2QU38@2759|Eukaryota,38G5W@33154|Opisthokonta,3BC3X@33208|Metazoa,3CUDJ@33213|Bilateria,47Z24@7711|Chordata,49292@7742|Vertebrata,3J34A@40674|Mammalia,4IWQ3@91561|Cetartiodactyla	33208|Metazoa	S	Family with sequence similarity 198 member B	FAM198B	GO:0005575,GO:0005622,GO:0005623,GO:0005737,GO:0005794,GO:0012505,GO:0043226,GO:0043227,GO:0043229,GO:0043231,GO:0044424,GO:0044444,GO:0044464	-	-	-	-	-	-	-	-	-	-	FAM198
LEUER_T0000224	gria2	132908.ENSPVAP00000000441	0.0	1582.0	KOG1052@1|root,KOG1054@2759|Eukaryota,39MCC@33154|Opisthokonta,3CNZE@33208|Metazoa,3DEZ0@33213|Bilateria,483NV@7711|Chordata,494NS@7742|Vertebrata,3J7BP@40674|Mammalia,4M1V7@9397|Chiroptera	33208|Metazoa	EPT	Glutamate receptor, ionotropic, AMPA 2	GRIA2	GO:0000149,GO:0001540,GO:0001919,GO:0003008,GO:0003674,GO:0004888,GO:0004970,GO:0004971,GO:0005215,GO:0005216,GO:0005230,GO:0005231,GO:0005234,GO:0005261,GO:0005267,GO:0005272,GO:0005488,GO:0005515,GO:0005575,GO:0005622,GO:0005623,GO:0005737,GO:0005783,GO:0005886,GO:0005887,GO:0006810,GO:0006811,GO:0006812,GO:0006813,GO:0006814,GO:0006897,GO:0006898,GO:0007154,GO:0007165,GO:0007166,GO:0007215,GO:…	-	ko:K05198,ko:K05200,ko:K05313	ko04024,ko04080,ko04713,ko04720,ko04723,ko04724,ko04728,ko04730,ko05014,ko05030,ko05031,ko05033,map04024,map04080,map04713,map04720,map04723,map04724,map04728,map04730,map05014,map05030,map05031,map05033	-	-	-	ko00000,ko00001,ko04040	1.A.10.1.13,1.A.10.1.14,1.A.10.1.15,1.A.10.1.16,1.A.10.1.17,1.A.10.1.2	-	-	ANF_receptor,Lig_chan,Lig_chan-Glu_bd
LEUER_T0000225	gria2	9258.ENSOANP00000024675	0.0	1589.0	KOG1052@1|root,KOG1054@2759|Eukaryota,39MCC@33154|Opisthokonta,3CNZE@33208|Metazoa,3DEZ0@33213|Bilateria,483NV@7711|Chordata,494NS@7742|Vertebrata,3J7BP@40674|Mammalia	33208|Metazoa	T	AMPA glutamate receptor activity	GRIA2	GO:0000149,GO:0001540,GO:0001919,GO:0003008,GO:0003674,GO:0004888,GO:0004970,GO:0004971,GO:0005215,GO:0005216,GO:0005230,GO:0005231,GO:0005234,GO:0005261,GO:0005267,GO:0005272,GO:0005488,GO:0005515,GO:0005575,GO:0005622,GO:0005623,GO:0005737,GO:0005783,GO:0005886,GO:0005887,GO:0006810,GO:0006811,GO:0006812,GO:0006813,GO:0006814,GO:0006897,GO:0006898,GO:0007154,GO:0007165,GO:0007166,GO:0007215,GO:…	-	ko:K05197,ko:K05198,ko:K05199,ko:K05200,ko:K05313	ko04024,ko04080,ko04713,ko04720,ko04723,ko04724,ko04728,ko04730,ko05014,ko05030,ko05031,ko05033,ko05202,map04024,map04080,map04713,map04720,map04723,map04724,map04728,map04730,map05014,map05030,map05031,map05033,map05202	-	-	-	ko00000,ko00001,ko04040	1.A.10.1.1,1.A.10.1.13,1.A.10.1.14,1.A.10.1.15,1.A.10.1.16,1.A.10.1.17,1.A.10.1.2,1.A.10.1.4	-	-	ANF_receptor,Lig_chan,Lig_chan-Glu_bd
LEUER_T0000226	gria2	8469.XP_007071336.1	0.0	1556.0	KOG1052@1|root,KOG1054@2759|Eukaryota,39MCC@33154|Opisthokonta,3CNZE@33208|Metazoa,3DEZ0@33213|Bilateria,483NV@7711|Chordata,494NS@7742|Vertebrata,4CDDV@8459|Testudines	33208|Metazoa	EPT	glutamate receptor	GRIA2	GO:0000149,GO:0001540,GO:0001919,GO:0003008,GO:0003674,GO:0004888,GO:0004970,GO:0004971,GO:0005215,GO:0005216,GO:0005230,GO:0005231,GO:0005234,GO:0005261,GO:0005267,GO:0005272,GO:0005488,GO:0005515,GO:0005575,GO:0005622,GO:0005623,GO:0005737,GO:0005783,GO:0005886,GO:0005887,GO:0006810,GO:0006811,GO:0006812,GO:0006813,GO:0006814,GO:0006897,GO:0006898,GO:0007154,GO:0007165,GO:0007166,GO:0007215,GO:…	-	ko:K05197,ko:K05198,ko:K05199,ko:K05200,ko:K05313	ko04024,ko04080,ko04713,ko04720,ko04723,ko04724,ko04728,ko04730,ko05014,ko05030,ko05031,ko05033,ko05202,map04024,map04080,map04713,map04720,map04723,map04724,map04728,map04730,map05014,map05030,map05031,map05033,map05202	-	-	-	ko00000,ko00001,ko04040	1.A.10.1.1,1.A.10.1.13,1.A.10.1.14,1.A.10.1.15,1.A.10.1.16,1.A.10.1.17,1.A.10.1.2,1.A.10.1.4	-	-	ANF_receptor,Lig_chan,Lig_chan-Glu_bd
LEUER_T0000228	gria2	9258.ENSOANP00000024675	0.0	1365.0	KOG1052@1|root,KOG1054@2759|Eukaryota,39MCC@33154|Opisthokonta,3CNZE@33208|Metazoa,3DEZ0@33213|Bilateria,483NV@7711|Chordata,494NS@7742|Vertebrata,3J7BP@40674|Mammalia	33208|Metazoa	T	AMPA glutamate receptor activity	GRIA2	GO:0000149,GO:0001540,GO:0001919,GO:0003008,GO:0003674,GO:0004888,GO:0004970,GO:0004971,GO:0005215,GO:0005216,GO:0005230,GO:0005231,GO:0005234,GO:0005261,GO:0005267,GO:0005272,GO:0005488,GO:0005515,GO:0005575,GO:0005622,GO:0005623,GO:0005737,GO:0005783,GO:0005886,GO:0005887,GO:0006810,GO:0006811,GO:0006812,GO:0006813,GO:0006814,GO:0006897,GO:0006898,GO:0007154,GO:0007165,GO:0007166,GO:0007215,GO:…	-	ko:K05197,ko:K05198,ko:K05199,ko:K05200,ko:K05313	ko04024,ko04080,ko04713,ko04720,ko04723,ko04724,ko04728,ko04730,ko05014,ko05030,ko05031,ko05033,ko05202,map04024,map04080,map04713,map04720,map04723,map04724,map04728,map04730,map05014,map05030,map05031,map05033,map05202	-	-	-	ko00000,ko00001,ko04040	1.A.10.1.1,1.A.10.1.13,1.A.10.1.14,1.A.10.1.15,1.A.10.1.16,1.A.10.1.17,1.A.10.1.2,1.A.10.1.4	-	-	ANF_receptor,Lig_chan,Lig_chan-Glu_bd
LEUER_T0000229	gria2	29078.XP_008142744.1	0.0	1578.0	KOG1052@1|root,KOG1054@2759|Eukaryota,39MCC@33154|Opisthokonta,3CNZE@33208|Metazoa,3DEZ0@33213|Bilateria,483NV@7711|Chordata,494NS@7742|Vertebrata,3J7BP@40674|Mammalia,4M09R@9397|Chiroptera	33208|Metazoa	EPT	Glutamate receptor 2	GRIA2	GO:0000149,GO:0001540,GO:0001919,GO:0003008,GO:0003674,GO:0004888,GO:0004970,GO:0004971,GO:0005215,GO:0005216,GO:0005230,GO:0005231,GO:0005234,GO:0005261,GO:0005267,GO:0005272,GO:0005488,GO:0005515,GO:0005575,GO:0005622,GO:0005623,GO:0005737,GO:0005783,GO:0005886,GO:0005887,GO:0006810,GO:0006811,GO:0006812,GO:0006813,GO:0006814,GO:0006897,GO:0006898,GO:0007154,GO:0007165,GO:0007166,GO:0007215,GO:…	-	ko:K05198,ko:K05200,ko:K05313	ko04024,ko04080,ko04713,ko04720,ko04723,ko04724,ko04728,ko04730,ko05014,ko05030,ko05031,ko05033,map04024,map04080,map04713,map04720,map04723,map04724,map04728,map04730,map05014,map05030,map05031,map05033	-	-	-	ko00000,ko00001,ko04040	1.A.10.1.13,1.A.10.1.14,1.A.10.1.15,1.A.10.1.16,1.A.10.1.17,1.A.10.1.2	-	-	ANF_receptor,Lig_chan,Lig_chan-Glu_bd
LEUER_T0000227	gria2	59538.XP_005961761.1	0.0	1546.0	KOG1052@1|root,KOG1054@2759|Eukaryota,39MCC@33154|Opisthokonta,3CNZE@33208|Metazoa,3DEZ0@33213|Bilateria,483NV@7711|Chordata,494NS@7742|Vertebrata,3J7BP@40674|Mammalia,4IZD2@91561|Cetartiodactyla	33208|Metazoa	T	glutamate receptor	GRIA2	GO:0000149,GO:0001540,GO:0001919,GO:0003008,GO:0003674,GO:0004888,GO:0004970,GO:0004971,GO:0005215,GO:0005216,GO:0005230,GO:0005231,GO:0005234,GO:0005261,GO:0005267,GO:0005272,GO:0005488,GO:0005515,GO:0005575,GO:0005622,GO:0005623,GO:0005737,GO:0005783,GO:0005886,GO:0005887,GO:0006810,GO:0006811,GO:0006812,GO:0006813,GO:0006814,GO:0006897,GO:0006898,GO:0007154,GO:0007165,GO:0007166,GO:0007215,GO:…	-	ko:K05197,ko:K05198,ko:K05199,ko:K05200,ko:K05313	ko04024,ko04080,ko04713,ko04720,ko04723,ko04724,ko04728,ko04730,ko05014,ko05030,ko05031,ko05033,ko05202,map04024,map04080,map04713,map04720,map04723,map04724,map04728,map04730,map05014,map05030,map05031,map05033,map05202	-	-	-	ko00000,ko00001,ko04040	1.A.10.1.1,1.A.10.1.13,1.A.10.1.14,1.A.10.1.15,1.A.10.1.16,1.A.10.1.17,1.A.10.1.2,1.A.10.1.4	-	-	ANF_receptor,Lig_chan,Lig_chan-Glu_bd
LEUER_T0000230	gria2	9031.ENSGALP00000015306	0.0	1448.0	KOG1052@1|root,KOG1054@2759|Eukaryota,39MCC@33154|Opisthokonta,3CNZE@33208|Metazoa,3DEZ0@33213|Bilateria,483NV@7711|Chordata,494NS@7742|Vertebrata,4GI4U@8782|Aves	33208|Metazoa	EPT	Glutamate receptor, ionotropic, AMPA 2	GRIA2	GO:0000149,GO:0001540,GO:0001919,GO:0003008,GO:0003674,GO:0004888,GO:0004970,GO:0004971,GO:0005215,GO:0005216,GO:0005230,GO:0005231,GO:0005234,GO:0005261,GO:0005267,GO:0005272,GO:0005488,GO:0005515,GO:0005575,GO:0005622,GO:0005623,GO:0005737,GO:0005783,GO:0005886,GO:0005887,GO:0006810,GO:0006811,GO:0006812,GO:0006813,GO:0006814,GO:0006897,GO:0006898,GO:0007154,GO:0007165,GO:0007166,GO:0007215,GO:…	-	ko:K05197,ko:K05198,ko:K05199,ko:K05200,ko:K05313	ko04024,ko04080,ko04713,ko04720,ko04723,ko04724,ko04728,ko04730,ko05014,ko05030,ko05031,ko05033,ko05202,map04024,map04080,map04713,map04720,map04723,map04724,map04728,map04730,map05014,map05030,map05031,map05033,map05202	-	-	-	ko00000,ko00001,ko04040	1.A.10.1.1,1.A.10.1.13,1.A.10.1.14,1.A.10.1.15,1.A.10.1.16,1.A.10.1.17,1.A.10.1.2,1.A.10.1.4	-	-	ANF_receptor,Lig_chan,Lig_chan-Glu_bd
LEUER_T0000231	glrb	13616.ENSMODP00000002131	2.64e-187	532.0	KOG3644@1|root,KOG3644@2759|Eukaryota,38Z7P@33154|Opisthokonta,3BFHB@33208|Metazoa,3D197@33213|Bilateria,485ES@7711|Chordata,48Z3N@7742|Vertebrata,3J5GD@40674|Mammalia,4K2Q9@9263|Metatheria	33208|Metazoa	T	Glycine receptor, beta	GLRB	GO:0000003,GO:0001101,GO:0001941,GO:0001964,GO:0003008,GO:0003674,GO:0005215,GO:0005216,GO:0005230,GO:0005231,GO:0005237,GO:0005253,GO:0005254,GO:0005488,GO:0005575,GO:0005622,GO:0005623,GO:0005737,GO:0005783,GO:0005886,GO:0005887,GO:0006810,GO:0006811,GO:0006820,GO:0006821,GO:0007154,GO:0007165,GO:0007166,GO:0007186,GO:0007218,GO:0007267,GO:0007268,GO:0007275,GO:0007338,GO:0007340,GO:0007399,GO:…	-	ko:K05196	ko04080,map04080	-	-	-	ko00000,ko00001,ko04040,ko04131	1.A.9.3	-	-	Neur_chan_LBD,Neur_chan_memb
LEUER_T0000232	pdgfc	128390.XP_009473175.1	2.52e-123	360.0	28N9B@1|root,2QUUR@2759|Eukaryota,39233@33154|Opisthokonta,3BFXJ@33208|Metazoa,3D24Z@33213|Bilateria,482M3@7711|Chordata,48ZUX@7742|Vertebrata,4GIWI@8782|Aves	33208|Metazoa	T	growth factor C	PDGFC	GO:0000139,GO:0001101,GO:0001501,GO:0001932,GO:0001934,GO:0003674,GO:0005102,GO:0005161,GO:0005488,GO:0005515,GO:0005575,GO:0005576,GO:0005615,GO:0005622,GO:0005623,GO:0005737,GO:0005783,GO:0005788,GO:0005794,GO:0005829,GO:0005886,GO:0006950,GO:0007154,GO:0007165,GO:0007166,GO:0007167,GO:0007169,GO:0007171,GO:0007275,GO:0007399,GO:0007417,GO:0007596,GO:0007599,GO:0008150,GO:0008284,GO:0009611,GO:…	-	ko:K05450	ko01521,ko04010,ko04014,ko04015,ko04072,ko04151,ko04510,ko04540,ko04810,ko05215,ko05218,ko05231,map01521,map04010,map04014,map04015,map04072,map04151,map04510,map04540,map04810,map05215,map05218,map05231	-	-	-	ko00000,ko00001,ko04052,ko04516	-	-	-	CUB,PDGF
LEUER_T0000233	ctso	7918.ENSLOCP00000009992	6.59e-125	370.0	COG4870@1|root,KOG1542@2759|Eukaryota,38CJI@33154|Opisthokonta,3BBDI@33208|Metazoa,3CZHQ@33213|Bilateria,487CR@7711|Chordata,48YSB@7742|Vertebrata,4A256@7898|Actinopterygii	33208|Metazoa	O	Belongs to the peptidase C1 family	CTSO	GO:0000323,GO:0003674,GO:0003824,GO:0004175,GO:0004197,GO:0005575,GO:0005576,GO:0005615,GO:0005622,GO:0005623,GO:0005737,GO:0005764,GO:0005773,GO:0006508,GO:0006807,GO:0008150,GO:0008152,GO:0008233,GO:0008234,GO:0009056,GO:0009057,GO:0009987,GO:0016787,GO:0019538,GO:0030163,GO:0043170,GO:0043226,GO:0043227,GO:0043229,GO:0043231,GO:0044237,GO:0044238,GO:0044248,GO:0044257,GO:0044260,GO:0044265,GO:…	3.4.22.42	ko:K01374,ko:K04832	ko04142,ko04210,ko04750,map04142,map04210,map04750	-	-	-	ko00000,ko00001,ko01000,ko01002,ko04040	1.A.6.1.3	-	-	Inhibitor_I29,Peptidase_C1
LEUER_T0000234	tdo2	8469.XP_007071332.1	9.55e-235	652.0	COG3483@1|root,KOG3906@2759|Eukaryota,38BTM@33154|Opisthokonta,3BB71@33208|Metazoa,3CUF5@33213|Bilateria,48AAZ@7711|Chordata,48UZU@7742|Vertebrata,4C7IU@8459|Testudines	33208|Metazoa	E	Tryptophan 2,3-dioxygenase	TDO2	GO:0003674,GO:0003824,GO:0004833,GO:0005488,GO:0005515,GO:0005575,GO:0005622,GO:0005623,GO:0005737,GO:0005829,GO:0006082,GO:0006084,GO:0006139,GO:0006163,GO:0006520,GO:0006568,GO:0006569,GO:0006576,GO:0006586,GO:0006637,GO:0006725,GO:0006726,GO:0006727,GO:0006732,GO:0006753,GO:0006790,GO:0006793,GO:0006796,GO:0006807,GO:0008055,GO:0008144,GO:0008150,GO:0008152,GO:0009056,GO:0009058,GO:0009063,GO:…	1.13.11.11	ko:K00453	ko00380,ko01100,map00380,map01100	M00038	R00678	RC00356	ko00000,ko00001,ko00002,ko01000	-	-	-	Trp_dioxygenase
LEUER_T0000235	gucy1b1	9031.ENSGALP00000015230	0.0	941.0	COG2114@1|root,KOG4171@2759|Eukaryota,38F1A@33154|Opisthokonta,3BERJ@33208|Metazoa,3CU39@33213|Bilateria,481Q2@7711|Chordata,48XXN@7742|Vertebrata,4GKFT@8782|Aves	33208|Metazoa	F	Guanylate cyclase soluble subunit beta-1	GUCY1B3	GO:0000302,GO:0003008,GO:0003013,GO:0003674,GO:0003824,GO:0004383,GO:0005488,GO:0005515,GO:0005575,GO:0005622,GO:0005623,GO:0005737,GO:0005829,GO:0005886,GO:0006139,GO:0006163,GO:0006164,GO:0006182,GO:0006725,GO:0006753,GO:0006793,GO:0006796,GO:0006807,GO:0006950,GO:0006979,GO:0007154,GO:0007165,GO:0007263,GO:0007267,GO:0008015,GO:0008074,GO:0008150,GO:0008152,GO:0009058,GO:0009117,GO:0009150,GO:…	4.6.1.2	ko:K12318,ko:K12319	ko00230,ko04022,ko04270,ko04540,ko04611,ko04713,ko04730,ko04921,ko04924,ko04970,map00230,map04022,map04270,map04540,map04611,map04713,map04730,map04921,map04924,map04970	M00694	R00434	RC00295	ko00000,ko00001,ko00002,ko01000	-	-	-	Guanylate_cyc,HNOB,HNOBA
LEUER_T0000238	larp7	8469.XP_007054489.1	1.92e-185	542.0	KOG0118@1|root,KOG0118@2759|Eukaryota,38D6I@33154|Opisthokonta,3BHGC@33208|Metazoa,3D1KP@33213|Bilateria,48BB5@7711|Chordata,495KM@7742|Vertebrata,4C9K1@8459|Testudines	33208|Metazoa	A	La ribonucleoprotein domain family, member 7	LARP7	GO:0000003,GO:0000122,GO:0003674,GO:0003676,GO:0003723,GO:0005488,GO:0005575,GO:0005622,GO:0005623,GO:0005634,GO:0005654,GO:0005737,GO:0005829,GO:0006355,GO:0006357,GO:0006950,GO:0007276,GO:0007346,GO:0008150,GO:0008283,GO:0009611,GO:0009888,GO:0009889,GO:0009890,GO:0009892,GO:0010468,GO:0010556,GO:0010558,GO:0010564,GO:0010605,GO:0010629,GO:0016202,GO:0017069,GO:0019219,GO:0019222,GO:0019953,GO:…	-	ko:K15191	-	-	-	-	ko00000,ko03021	-	-	-	La,RRM_1,RRM_3
LEUER_T0000237	larp7	8469.XP_007054489.1	1.92e-185	542.0	KOG0118@1|root,KOG0118@2759|Eukaryota,38D6I@33154|Opisthokonta,3BHGC@33208|Metazoa,3D1KP@33213|Bilateria,48BB5@7711|Chordata,495KM@7742|Vertebrata,4C9K1@8459|Testudines	33208|Metazoa	A	La ribonucleoprotein domain family, member 7	LARP7	GO:0000003,GO:0000122,GO:0003674,GO:0003676,GO:0003723,GO:0005488,GO:0005575,GO:0005622,GO:0005623,GO:0005634,GO:0005654,GO:0005737,GO:0005829,GO:0006355,GO:0006357,GO:0006950,GO:0007276,GO:0007346,GO:0008150,GO:0008283,GO:0009611,GO:0009888,GO:0009889,GO:0009890,GO:0009892,GO:0010468,GO:0010556,GO:0010558,GO:0010564,GO:0010605,GO:0010629,GO:0016202,GO:0017069,GO:0019219,GO:0019222,GO:0019953,GO:…	-	ko:K15191	-	-	-	-	ko00000,ko03021	-	-	-	La,RRM_1,RRM_3
LEUER_T0000236	larp7	8469.XP_007054489.1	1.92e-185	542.0	KOG0118@1|root,KOG0118@2759|Eukaryota,38D6I@33154|Opisthokonta,3BHGC@33208|Metazoa,3D1KP@33213|Bilateria,48BB5@7711|Chordata,495KM@7742|Vertebrata,4C9K1@8459|Testudines	33208|Metazoa	A	La ribonucleoprotein domain family, member 7	LARP7	GO:0000003,GO:0000122,GO:0003674,GO:0003676,GO:0003723,GO:0005488,GO:0005575,GO:0005622,GO:0005623,GO:0005634,GO:0005654,GO:0005737,GO:0005829,GO:0006355,GO:0006357,GO:0006950,GO:0007276,GO:0007346,GO:0008150,GO:0008283,GO:0009611,GO:0009888,GO:0009889,GO:0009890,GO:0009892,GO:0010468,GO:0010556,GO:0010558,GO:0010564,GO:0010605,GO:0010629,GO:0016202,GO:0017069,GO:0019219,GO:0019222,GO:0019953,GO:…	-	ko:K15191	-	-	-	-	ko00000,ko03021	-	-	-	La,RRM_1,RRM_3
LEUER_T0000239	larp7	8469.XP_007054489.1	8.95e-187	545.0	KOG0118@1|root,KOG0118@2759|Eukaryota,38D6I@33154|Opisthokonta,3BHGC@33208|Metazoa,3D1KP@33213|Bilateria,48BB5@7711|Chordata,495KM@7742|Vertebrata,4C9K1@8459|Testudines	33208|Metazoa	A	La ribonucleoprotein domain family, member 7	LARP7	GO:0000003,GO:0000122,GO:0003674,GO:0003676,GO:0003723,GO:0005488,GO:0005575,GO:0005622,GO:0005623,GO:0005634,GO:0005654,GO:0005737,GO:0005829,GO:0006355,GO:0006357,GO:0006950,GO:0007276,GO:0007346,GO:0008150,GO:0008283,GO:0009611,GO:0009888,GO:0009889,GO:0009890,GO:0009892,GO:0010468,GO:0010556,GO:0010558,GO:0010564,GO:0010605,GO:0010629,GO:0016202,GO:0017069,GO:0019219,GO:0019222,GO:0019953,GO:…	-	ko:K15191	-	-	-	-	ko00000,ko03021	-	-	-	La,RRM_1,RRM_3
LEUER_T0000240	zgrf1	8479.XP_008168370.1	0.0	1048.0	COG1112@1|root,KOG1802@2759|Eukaryota,38HI4@33154|Opisthokonta,3BI4K@33208|Metazoa,3CYUG@33213|Bilateria,489JZ@7711|Chordata,498VN@7742|Vertebrata,4CBJS@8459|Testudines	33208|Metazoa	A	GRF zinc finger	ZGRF1	-	-	-	-	-	-	-	-	-	-	-	AAA_11,AAA_12,DUF2439,zf-GRF
LEUER_T0000241	zgrf1	8469.XP_007054547.1	0.0	1036.0	COG1112@1|root,KOG1802@2759|Eukaryota,38HI4@33154|Opisthokonta,3BI4K@33208|Metazoa,3CYUG@33213|Bilateria,489JZ@7711|Chordata,498VN@7742|Vertebrata,4CBJS@8459|Testudines	33208|Metazoa	A	GRF zinc finger	ZGRF1	-	-	-	-	-	-	-	-	-	-	-	AAA_11,AAA_12,DUF2439,zf-GRF
LEUER_T0000242	zgrf1	38654.XP_006025618.1	0.0	1057.0	COG1112@1|root,KOG1802@2759|Eukaryota,38HI4@33154|Opisthokonta,3BI4K@33208|Metazoa,3CYUG@33213|Bilateria,489JZ@7711|Chordata,498VN@7742|Vertebrata	33208|Metazoa	A	zinc ion binding	ZGRF1	-	-	-	-	-	-	-	-	-	-	-	AAA_11,AAA_12,DUF2439,zf-GRF
LEUER_T0000244	neurog2	176946.XP_007423650.1	1.56e-42	150.0	KOG3898@1|root,KOG3898@2759|Eukaryota,3A04W@33154|Opisthokonta,3BPZP@33208|Metazoa,3D6EE@33213|Bilateria,488MC@7711|Chordata,4996J@7742|Vertebrata	33208|Metazoa	K	learned vocalization behavior	NEUROG1	GO:0000003,GO:0000578,GO:0000976,GO:0000977,GO:0000978,GO:0000981,GO:0000987,GO:0000988,GO:0000989,GO:0001012,GO:0001067,GO:0001501,GO:0003002,GO:0003006,GO:0003008,GO:0003012,GO:0003674,GO:0003676,GO:0003677,GO:0003682,GO:0003690,GO:0003700,GO:0005488,GO:0005515,GO:0005575,GO:0005623,GO:0006355,GO:0006357,GO:0006936,GO:0006939,GO:0006950,GO:0007088,GO:0007096,GO:0007275,GO:0007346,GO:0007350,GO:…	-	ko:K08028,ko:K09081,ko:K09082	ko04550,ko04950,map04550,map04950	-	-	-	ko00000,ko00001,ko03000	-	-	-	HLH
LEUER_T0000245	neurog2	176946.XP_007423650.1	1.56e-42	150.0	KOG3898@1|root,KOG3898@2759|Eukaryota,3A04W@33154|Opisthokonta,3BPZP@33208|Metazoa,3D6EE@33213|Bilateria,488MC@7711|Chordata,4996J@7742|Vertebrata	33208|Metazoa	K	learned vocalization behavior	NEUROG1	GO:0000003,GO:0000578,GO:0000976,GO:0000977,GO:0000978,GO:0000981,GO:0000987,GO:0000988,GO:0000989,GO:0001012,GO:0001067,GO:0001501,GO:0003002,GO:0003006,GO:0003008,GO:0003012,GO:0003674,GO:0003676,GO:0003677,GO:0003682,GO:0003690,GO:0003700,GO:0005488,GO:0005515,GO:0005575,GO:0005623,GO:0006355,GO:0006357,GO:0006936,GO:0006939,GO:0006950,GO:0007088,GO:0007096,GO:0007275,GO:0007346,GO:0007350,GO:…	-	ko:K08028,ko:K09081,ko:K09082	ko04550,ko04950,map04550,map04950	-	-	-	ko00000,ko00001,ko03000	-	-	-	HLH
LEUER_T0000247	alpk1	38654.XP_006025617.1	2.17e-277	823.0	28NQ8@1|root,2QX1X@2759|Eukaryota,38GUT@33154|Opisthokonta,3BJ9W@33208|Metazoa,3CUQA@33213|Bilateria,480EV@7711|Chordata,4937C@7742|Vertebrata	33208|Metazoa	S	alpha-protein kinase 1	ALPK1	GO:0003674,GO:0003824,GO:0004672,GO:0004674,GO:0005575,GO:0005622,GO:0005623,GO:0005737,GO:0006464,GO:0006468,GO:0006793,GO:0006796,GO:0006807,GO:0008150,GO:0008152,GO:0009605,GO:0009607,GO:0009617,GO:0009987,GO:0016301,GO:0016310,GO:0016740,GO:0016772,GO:0016773,GO:0019538,GO:0036211,GO:0043170,GO:0043207,GO:0043412,GO:0044237,GO:0044238,GO:0044260,GO:0044267,GO:0044424,GO:0044464,GO:0050896,GO:…	-	ko:K08868	-	-	-	-	ko00000,ko01001	-	-	-	Alpha_kinase
LEUER_T0000246	alpk1	7897.ENSLACP00000005110	0.0	945.0	28NQ8@1|root,2QX1X@2759|Eukaryota,38GUT@33154|Opisthokonta,3BJ9W@33208|Metazoa,3CUQA@33213|Bilateria,480EV@7711|Chordata,4937C@7742|Vertebrata	33208|Metazoa	S	alpha-protein kinase 1	ALPK1	GO:0003674,GO:0003824,GO:0004672,GO:0004674,GO:0005575,GO:0005622,GO:0005623,GO:0005737,GO:0006464,GO:0006468,GO:0006793,GO:0006796,GO:0006807,GO:0008150,GO:0008152,GO:0009605,GO:0009607,GO:0009617,GO:0009987,GO:0016301,GO:0016310,GO:0016740,GO:0016772,GO:0016773,GO:0019538,GO:0036211,GO:0043170,GO:0043207,GO:0043412,GO:0044237,GO:0044238,GO:0044260,GO:0044267,GO:0044424,GO:0044464,GO:0050896,GO:…	-	ko:K08868	-	-	-	-	ko00000,ko01001	-	-	-	Alpha_kinase
LEUER_T0000249	ap1ar	9031.ENSGALP00000041072	6.11e-127	370.0	28ICK@1|root,2QQP6@2759|Eukaryota,38HYP@33154|Opisthokonta,3BIGS@33208|Metazoa,3CTMB@33213|Bilateria,48CG2@7711|Chordata,490M6@7742|Vertebrata,4GMU2@8782|Aves	33208|Metazoa	S	regulatory protein	AP1AR	GO:0001919,GO:0001920,GO:0003674,GO:0005488,GO:0005515,GO:0005575,GO:0005622,GO:0005623,GO:0005737,GO:0005768,GO:0005769,GO:0005770,GO:0005794,GO:0005802,GO:0006810,GO:0006892,GO:0006895,GO:0006903,GO:0007162,GO:0008092,GO:0008150,GO:0009892,GO:0009987,GO:0010605,GO:0010721,GO:0010769,GO:0010771,GO:0010810,GO:0010812,GO:0012505,GO:0016192,GO:0016482,GO:0019222,GO:0019894,GO:0022603,GO:0022604,GO:…	-	-	-	-	-	-	-	-	-	-	AP1AR
LEUER_T0000250	ap1ar	9031.ENSGALP00000041072	1.61e-104	312.0	28ICK@1|root,2QQP6@2759|Eukaryota,38HYP@33154|Opisthokonta,3BIGS@33208|Metazoa,3CTMB@33213|Bilateria,48CG2@7711|Chordata,490M6@7742|Vertebrata,4GMU2@8782|Aves	33208|Metazoa	S	regulatory protein	AP1AR	GO:0001919,GO:0001920,GO:0003674,GO:0005488,GO:0005515,GO:0005575,GO:0005622,GO:0005623,GO:0005737,GO:0005768,GO:0005769,GO:0005770,GO:0005794,GO:0005802,GO:0006810,GO:0006892,GO:0006895,GO:0006903,GO:0007162,GO:0008092,GO:0008150,GO:0009892,GO:0009987,GO:0010605,GO:0010721,GO:0010769,GO:0010771,GO:0010810,GO:0010812,GO:0012505,GO:0016192,GO:0016482,GO:0019222,GO:0019894,GO:0022603,GO:0022604,GO:…	-	-	-	-	-	-	-	-	-	-	AP1AR
LEUER_T0000251	ap1ar	9031.ENSGALP00000041072	6.05e-104	311.0	28ICK@1|root,2QQP6@2759|Eukaryota,38HYP@33154|Opisthokonta,3BIGS@33208|Metazoa,3CTMB@33213|Bilateria,48CG2@7711|Chordata,490M6@7742|Vertebrata,4GMU2@8782|Aves	33208|Metazoa	S	regulatory protein	AP1AR	GO:0001919,GO:0001920,GO:0003674,GO:0005488,GO:0005515,GO:0005575,GO:0005622,GO:0005623,GO:0005737,GO:0005768,GO:0005769,GO:0005770,GO:0005794,GO:0005802,GO:0006810,GO:0006892,GO:0006895,GO:0006903,GO:0007162,GO:0008092,GO:0008150,GO:0009892,GO:0009987,GO:0010605,GO:0010721,GO:0010769,GO:0010771,GO:0010810,GO:0010812,GO:0012505,GO:0016192,GO:0016482,GO:0019222,GO:0019894,GO:0022603,GO:0022604,GO:…	-	-	-	-	-	-	-	-	-	-	AP1AR
LEUER_T0000248	ap1ar	9031.ENSGALP00000041072	1.72e-129	377.0	28ICK@1|root,2QQP6@2759|Eukaryota,38HYP@33154|Opisthokonta,3BIGS@33208|Metazoa,3CTMB@33213|Bilateria,48CG2@7711|Chordata,490M6@7742|Vertebrata,4GMU2@8782|Aves	33208|Metazoa	S	regulatory protein	AP1AR	GO:0001919,GO:0001920,GO:0003674,GO:0005488,GO:0005515,GO:0005575,GO:0005622,GO:0005623,GO:0005737,GO:0005768,GO:0005769,GO:0005770,GO:0005794,GO:0005802,GO:0006810,GO:0006892,GO:0006895,GO:0006903,GO:0007162,GO:0008092,GO:0008150,GO:0009892,GO:0009987,GO:0010605,GO:0010721,GO:0010769,GO:0010771,GO:0010810,GO:0010812,GO:0012505,GO:0016192,GO:0016482,GO:0019222,GO:0019894,GO:0022603,GO:0022604,GO:…	-	-	-	-	-	-	-	-	-	-	AP1AR
LEUER_T0000252	pitx2	7918.ENSLOCP00000014418	5.22e-157	448.0	KOG0486@1|root,KOG0486@2759|Eukaryota,38EV2@33154|Opisthokonta,3BJ2S@33208|Metazoa,3CS31@33213|Bilateria,487YY@7711|Chordata,491HK@7742|Vertebrata,49YJX@7898|Actinopterygii	33208|Metazoa	K	Paired-like homeodomain transcription factor 2	PITX2	GO:0000003,GO:0000122,GO:0000768,GO:0000976,GO:0000977,GO:0000978,GO:0000981,GO:0000982,GO:0000987,GO:0000988,GO:0000989,GO:0001012,GO:0001067,GO:0001076,GO:0001077,GO:0001078,GO:0001085,GO:0001101,GO:0001102,GO:0001191,GO:0001227,GO:0001228,GO:0001501,GO:0001525,GO:0001568,GO:0001569,GO:0001570,GO:0001654,GO:0001667,GO:0001701,GO:0001755,GO:0001763,GO:0001764,GO:0001944,GO:0001947,GO:0002009,GO:…	-	ko:K04686,ko:K09356,ko:K09357	ko04350,map04350	-	-	-	ko00000,ko00001,ko03000	-	-	-	Homeobox,OAR
LEUER_T0000253	pitx2	7918.ENSLOCP00000014418	6.1e-139	401.0	KOG0486@1|root,KOG0486@2759|Eukaryota,38EV2@33154|Opisthokonta,3BJ2S@33208|Metazoa,3CS31@33213|Bilateria,487YY@7711|Chordata,491HK@7742|Vertebrata,49YJX@7898|Actinopterygii	33208|Metazoa	K	Paired-like homeodomain transcription factor 2	PITX2	GO:0000003,GO:0000122,GO:0000768,GO:0000976,GO:0000977,GO:0000978,GO:0000981,GO:0000982,GO:0000987,GO:0000988,GO:0000989,GO:0001012,GO:0001067,GO:0001076,GO:0001077,GO:0001078,GO:0001085,GO:0001101,GO:0001102,GO:0001191,GO:0001227,GO:0001228,GO:0001501,GO:0001525,GO:0001568,GO:0001569,GO:0001570,GO:0001654,GO:0001667,GO:0001701,GO:0001755,GO:0001763,GO:0001764,GO:0001944,GO:0001947,GO:0002009,GO:…	-	ko:K04686,ko:K09356,ko:K09357	ko04350,map04350	-	-	-	ko00000,ko00001,ko03000	-	-	-	Homeobox,OAR
LEUER_T0000254	pitx2	7918.ENSLOCP00000014418	5.22e-157	448.0	KOG0486@1|root,KOG0486@2759|Eukaryota,38EV2@33154|Opisthokonta,3BJ2S@33208|Metazoa,3CS31@33213|Bilateria,487YY@7711|Chordata,491HK@7742|Vertebrata,49YJX@7898|Actinopterygii	33208|Metazoa	K	Paired-like homeodomain transcription factor 2	PITX2	GO:0000003,GO:0000122,GO:0000768,GO:0000976,GO:0000977,GO:0000978,GO:0000981,GO:0000982,GO:0000987,GO:0000988,GO:0000989,GO:0001012,GO:0001067,GO:0001076,GO:0001077,GO:0001078,GO:0001085,GO:0001101,GO:0001102,GO:0001191,GO:0001227,GO:0001228,GO:0001501,GO:0001525,GO:0001568,GO:0001569,GO:0001570,GO:0001654,GO:0001667,GO:0001701,GO:0001755,GO:0001763,GO:0001764,GO:0001944,GO:0001947,GO:0002009,GO:…	-	ko:K04686,ko:K09356,ko:K09357	ko04350,map04350	-	-	-	ko00000,ko00001,ko03000	-	-	-	Homeobox,OAR
LEUER_T0000255	pitx2	7918.ENSLOCP00000014418	5.22e-157	448.0	KOG0486@1|root,KOG0486@2759|Eukaryota,38EV2@33154|Opisthokonta,3BJ2S@33208|Metazoa,3CS31@33213|Bilateria,487YY@7711|Chordata,491HK@7742|Vertebrata,49YJX@7898|Actinopterygii	33208|Metazoa	K	Paired-like homeodomain transcription factor 2	PITX2	GO:0000003,GO:0000122,GO:0000768,GO:0000976,GO:0000977,GO:0000978,GO:0000981,GO:0000982,GO:0000987,GO:0000988,GO:0000989,GO:0001012,GO:0001067,GO:0001076,GO:0001077,GO:0001078,GO:0001085,GO:0001101,GO:0001102,GO:0001191,GO:0001227,GO:0001228,GO:0001501,GO:0001525,GO:0001568,GO:0001569,GO:0001570,GO:0001654,GO:0001667,GO:0001701,GO:0001755,GO:0001763,GO:0001764,GO:0001944,GO:0001947,GO:0002009,GO:…	-	ko:K04686,ko:K09356,ko:K09357	ko04350,map04350	-	-	-	ko00000,ko00001,ko03000	-	-	-	Homeobox,OAR
LEUER_T0000256	pitx2	7918.ENSLOCP00000014418	5.22e-157	448.0	KOG0486@1|root,KOG0486@2759|Eukaryota,38EV2@33154|Opisthokonta,3BJ2S@33208|Metazoa,3CS31@33213|Bilateria,487YY@7711|Chordata,491HK@7742|Vertebrata,49YJX@7898|Actinopterygii	33208|Metazoa	K	Paired-like homeodomain transcription factor 2	PITX2	GO:0000003,GO:0000122,GO:0000768,GO:0000976,GO:0000977,GO:0000978,GO:0000981,GO:0000982,GO:0000987,GO:0000988,GO:0000989,GO:0001012,GO:0001067,GO:0001076,GO:0001077,GO:0001078,GO:0001085,GO:0001101,GO:0001102,GO:0001191,GO:0001227,GO:0001228,GO:0001501,GO:0001525,GO:0001568,GO:0001569,GO:0001570,GO:0001654,GO:0001667,GO:0001701,GO:0001755,GO:0001763,GO:0001764,GO:0001944,GO:0001947,GO:0002009,GO:…	-	ko:K04686,ko:K09356,ko:K09357	ko04350,map04350	-	-	-	ko00000,ko00001,ko03000	-	-	-	Homeobox,OAR
LEUER_T0000257	pitx2	7918.ENSLOCP00000014418	5.22e-157	448.0	KOG0486@1|root,KOG0486@2759|Eukaryota,38EV2@33154|Opisthokonta,3BJ2S@33208|Metazoa,3CS31@33213|Bilateria,487YY@7711|Chordata,491HK@7742|Vertebrata,49YJX@7898|Actinopterygii	33208|Metazoa	K	Paired-like homeodomain transcription factor 2	PITX2	GO:0000003,GO:0000122,GO:0000768,GO:0000976,GO:0000977,GO:0000978,GO:0000981,GO:0000982,GO:0000987,GO:0000988,GO:0000989,GO:0001012,GO:0001067,GO:0001076,GO:0001077,GO:0001078,GO:0001085,GO:0001101,GO:0001102,GO:0001191,GO:0001227,GO:0001228,GO:0001501,GO:0001525,GO:0001568,GO:0001569,GO:0001570,GO:0001654,GO:0001667,GO:0001701,GO:0001755,GO:0001763,GO:0001764,GO:0001944,GO:0001947,GO:0002009,GO:…	-	ko:K04686,ko:K09356,ko:K09357	ko04350,map04350	-	-	-	ko00000,ko00001,ko03000	-	-	-	Homeobox,OAR
LEUER_T0000258	pitx2	7918.ENSLOCP00000014418	5.22e-157	448.0	KOG0486@1|root,KOG0486@2759|Eukaryota,38EV2@33154|Opisthokonta,3BJ2S@33208|Metazoa,3CS31@33213|Bilateria,487YY@7711|Chordata,491HK@7742|Vertebrata,49YJX@7898|Actinopterygii	33208|Metazoa	K	Paired-like homeodomain transcription factor 2	PITX2	GO:0000003,GO:0000122,GO:0000768,GO:0000976,GO:0000977,GO:0000978,GO:0000981,GO:0000982,GO:0000987,GO:0000988,GO:0000989,GO:0001012,GO:0001067,GO:0001076,GO:0001077,GO:0001078,GO:0001085,GO:0001101,GO:0001102,GO:0001191,GO:0001227,GO:0001228,GO:0001501,GO:0001525,GO:0001568,GO:0001569,GO:0001570,GO:0001654,GO:0001667,GO:0001701,GO:0001755,GO:0001763,GO:0001764,GO:0001944,GO:0001947,GO:0002009,GO:…	-	ko:K04686,ko:K09356,ko:K09357	ko04350,map04350	-	-	-	ko00000,ko00001,ko03000	-	-	-	Homeobox,OAR
LEUER_T0000259	pitx2	7918.ENSLOCP00000014418	5.22e-157	448.0	KOG0486@1|root,KOG0486@2759|Eukaryota,38EV2@33154|Opisthokonta,3BJ2S@33208|Metazoa,3CS31@33213|Bilateria,487YY@7711|Chordata,491HK@7742|Vertebrata,49YJX@7898|Actinopterygii	33208|Metazoa	K	Paired-like homeodomain transcription factor 2	PITX2	GO:0000003,GO:0000122,GO:0000768,GO:0000976,GO:0000977,GO:0000978,GO:0000981,GO:0000982,GO:0000987,GO:0000988,GO:0000989,GO:0001012,GO:0001067,GO:0001076,GO:0001077,GO:0001078,GO:0001085,GO:0001101,GO:0001102,GO:0001191,GO:0001227,GO:0001228,GO:0001501,GO:0001525,GO:0001568,GO:0001569,GO:0001570,GO:0001654,GO:0001667,GO:0001701,GO:0001755,GO:0001763,GO:0001764,GO:0001944,GO:0001947,GO:0002009,GO:…	-	ko:K04686,ko:K09356,ko:K09357	ko04350,map04350	-	-	-	ko00000,ko00001,ko03000	-	-	-	Homeobox,OAR
LEUER_T0000260	pitx2	7918.ENSLOCP00000014418	5.22e-157	448.0	KOG0486@1|root,KOG0486@2759|Eukaryota,38EV2@33154|Opisthokonta,3BJ2S@33208|Metazoa,3CS31@33213|Bilateria,487YY@7711|Chordata,491HK@7742|Vertebrata,49YJX@7898|Actinopterygii	33208|Metazoa	K	Paired-like homeodomain transcription factor 2	PITX2	GO:0000003,GO:0000122,GO:0000768,GO:0000976,GO:0000977,GO:0000978,GO:0000981,GO:0000982,GO:0000987,GO:0000988,GO:0000989,GO:0001012,GO:0001067,GO:0001076,GO:0001077,GO:0001078,GO:0001085,GO:0001101,GO:0001102,GO:0001191,GO:0001227,GO:0001228,GO:0001501,GO:0001525,GO:0001568,GO:0001569,GO:0001570,GO:0001654,GO:0001667,GO:0001701,GO:0001755,GO:0001763,GO:0001764,GO:0001944,GO:0001947,GO:0002009,GO:…	-	ko:K04686,ko:K09356,ko:K09357	ko04350,map04350	-	-	-	ko00000,ko00001,ko03000	-	-	-	Homeobox,OAR
LEUER_T0000261	pitx2	8364.ENSXETP00000029210	1.15e-160	458.0	KOG0486@1|root,KOG0486@2759|Eukaryota,38EV2@33154|Opisthokonta,3BJ2S@33208|Metazoa,3CS31@33213|Bilateria,487YY@7711|Chordata,491HK@7742|Vertebrata	33208|Metazoa	K	Pituitary homeobox 2	PITX2	GO:0000003,GO:0000122,GO:0000768,GO:0000976,GO:0000977,GO:0000978,GO:0000981,GO:0000982,GO:0000987,GO:0000988,GO:0000989,GO:0001012,GO:0001067,GO:0001076,GO:0001077,GO:0001078,GO:0001085,GO:0001101,GO:0001102,GO:0001191,GO:0001227,GO:0001228,GO:0001501,GO:0001525,GO:0001568,GO:0001569,GO:0001570,GO:0001654,GO:0001667,GO:0001701,GO:0001755,GO:0001763,GO:0001764,GO:0001944,GO:0001947,GO:0002009,GO:…	-	ko:K04686,ko:K09356,ko:K09357	ko04350,map04350	-	-	-	ko00000,ko00001,ko03000	-	-	-	Homeobox,OAR
LEUER_T0000262	enpep	8469.XP_007054545.1	0.0	1244.0	COG0308@1|root,KOG1046@2759|Eukaryota,38CFG@33154|Opisthokonta,3BD0T@33208|Metazoa,3CUKR@33213|Bilateria,484ZT@7711|Chordata,49124@7742|Vertebrata,4CA56@8459|Testudines	33208|Metazoa	EO	Peptidase family M1 domain	ENPEP	GO:0001525,GO:0001568,GO:0001655,GO:0001822,GO:0001944,GO:0001990,GO:0001991,GO:0002002,GO:0002003,GO:0003008,GO:0003013,GO:0003044,GO:0003073,GO:0003081,GO:0003674,GO:0003824,GO:0004177,GO:0005488,GO:0005575,GO:0005622,GO:0005623,GO:0005737,GO:0005886,GO:0005887,GO:0005903,GO:0006403,GO:0006508,GO:0006518,GO:0006725,GO:0006807,GO:0006810,GO:0006928,GO:0007154,GO:0007267,GO:0007275,GO:0008015,GO:…	3.4.11.3,3.4.11.7	ko:K01257,ko:K09604,ko:K11141,ko:K13723	ko04614,map04614	-	-	-	ko00000,ko00001,ko01000,ko01002,ko04090,ko04147	-	-	-	ERAP1_C,Peptidase_M1
LEUER_T0000263	elovl6	7897.ENSLACP00000023300	4.02e-170	479.0	KOG3071@1|root,KOG3072@2759|Eukaryota,38H3H@33154|Opisthokonta,3BGKB@33208|Metazoa,3D0ZP@33213|Bilateria,4837P@7711|Chordata,48YRN@7742|Vertebrata	33208|Metazoa	I	fatty acid elongation, polyunsaturated fatty acid	ELOVL6	GO:0000038,GO:0001676,GO:0003674,GO:0003824,GO:0004312,GO:0005575,GO:0005622,GO:0005623,GO:0005737,GO:0005783,GO:0005789,GO:0006082,GO:0006139,GO:0006163,GO:0006164,GO:0006629,GO:0006631,GO:0006633,GO:0006637,GO:0006643,GO:0006665,GO:0006725,GO:0006732,GO:0006753,GO:0006790,GO:0006793,GO:0006796,GO:0006807,GO:0008150,GO:0008152,GO:0008610,GO:0009058,GO:0009108,GO:0009117,GO:0009150,GO:0009152,GO:…	2.3.1.199	ko:K10203	ko00062,ko01040,ko01110,ko01212,map00062,map01040,map01110,map01212	M00415	R07758,R07762,R09419,R10825	RC00004,RC00039,RC02728,RC02888,RC02997	ko00000,ko00001,ko00002,ko01000,ko01004	-	-	-	ELO
LEUER_T0000264	elovl6	7897.ENSLACP00000023300	3.92e-131	379.0	KOG3071@1|root,KOG3072@2759|Eukaryota,38H3H@33154|Opisthokonta,3BGKB@33208|Metazoa,3D0ZP@33213|Bilateria,4837P@7711|Chordata,48YRN@7742|Vertebrata	33208|Metazoa	I	fatty acid elongation, polyunsaturated fatty acid	ELOVL6	GO:0000038,GO:0001676,GO:0003674,GO:0003824,GO:0004312,GO:0005575,GO:0005622,GO:0005623,GO:0005737,GO:0005783,GO:0005789,GO:0006082,GO:0006139,GO:0006163,GO:0006164,GO:0006629,GO:0006631,GO:0006633,GO:0006637,GO:0006643,GO:0006665,GO:0006725,GO:0006732,GO:0006753,GO:0006790,GO:0006793,GO:0006796,GO:0006807,GO:0008150,GO:0008152,GO:0008610,GO:0009058,GO:0009108,GO:0009117,GO:0009150,GO:0009152,GO:…	2.3.1.199	ko:K10203	ko00062,ko01040,ko01110,ko01212,map00062,map01040,map01110,map01212	M00415	R07758,R07762,R09419,R10825	RC00004,RC00039,RC02728,RC02888,RC02997	ko00000,ko00001,ko00002,ko01000,ko01004	-	-	-	ELO
LEUER_T0000265	egf	8479.XP_005287979.1	2.79e-270	801.0	KOG1215@1|root,KOG1215@2759|Eukaryota,38B7B@33154|Opisthokonta,3BHG1@33208|Metazoa,3CYG0@33213|Bilateria,488G4@7711|Chordata,490KQ@7742|Vertebrata,4CAW0@8459|Testudines	33208|Metazoa	T	Growth factor	EGF	GO:0000165,GO:0000186,GO:0000187,GO:0001525,GO:0001568,GO:0001654,GO:0001655,GO:0001763,GO:0001822,GO:0001932,GO:0001934,GO:0001944,GO:0002009,GO:0002090,GO:0002092,GO:0002576,GO:0002791,GO:0003002,GO:0003674,GO:0003824,GO:0004672,GO:0004713,GO:0004888,GO:0005085,GO:0005088,GO:0005102,GO:0005154,GO:0005488,GO:0005515,GO:0005575,GO:0005576,GO:0005615,GO:0005622,GO:0005623,GO:0005737,GO:0005886,GO:…	-	ko:K02599,ko:K04357,ko:K20051	ko01521,ko01522,ko04010,ko04012,ko04014,ko04015,ko04060,ko04066,ko04068,ko04072,ko04151,ko04320,ko04330,ko04510,ko04540,ko04630,ko04658,ko04810,ko04919,ko05020,ko05160,ko05165,ko05200,ko05206,ko05210,ko05212,ko05213,ko05214,ko05215,ko05218,ko05219,ko05223,ko05224,ko05226,ko05231,map01521,map01522,map04010,map04012,map04014,map04015,map04060,map04066,map04068,map04072,map04151,map04320,map04330,ma…	M00682	-	-	ko00000,ko00001,ko00002,ko04052,ko04131	-	-	-	DUF5050,EGF,EGF_CA,FXa_inhibition,Ldl_recept_b,cEGF
LEUER_T0000266	egf	7918.ENSLOCP00000014477	7.17e-258	766.0	KOG1215@1|root,KOG1215@2759|Eukaryota,38B7B@33154|Opisthokonta,3BHG1@33208|Metazoa,3CYG0@33213|Bilateria,488G4@7711|Chordata,490KQ@7742|Vertebrata,4A1AS@7898|Actinopterygii	33208|Metazoa	T	Growth factor	EGF	GO:0000165,GO:0000186,GO:0000187,GO:0001525,GO:0001568,GO:0001654,GO:0001655,GO:0001763,GO:0001822,GO:0001932,GO:0001934,GO:0001944,GO:0002009,GO:0002090,GO:0002092,GO:0002576,GO:0002791,GO:0003002,GO:0003674,GO:0003824,GO:0004672,GO:0004713,GO:0004888,GO:0005085,GO:0005088,GO:0005102,GO:0005154,GO:0005488,GO:0005515,GO:0005575,GO:0005576,GO:0005615,GO:0005622,GO:0005623,GO:0005737,GO:0005886,GO:…	-	ko:K02599,ko:K04357,ko:K20051	ko01521,ko01522,ko04010,ko04012,ko04014,ko04015,ko04060,ko04066,ko04068,ko04072,ko04151,ko04320,ko04330,ko04510,ko04540,ko04630,ko04658,ko04810,ko04919,ko05020,ko05160,ko05165,ko05200,ko05206,ko05210,ko05212,ko05213,ko05214,ko05215,ko05218,ko05219,ko05223,ko05224,ko05226,ko05231,map01521,map01522,map04010,map04012,map04014,map04015,map04060,map04066,map04068,map04072,map04151,map04320,map04330,ma…	M00682	-	-	ko00000,ko00001,ko00002,ko04052,ko04131	-	-	-	DUF5050,EGF,EGF_CA,FXa_inhibition,Ldl_recept_b,cEGF
LEUER_T0000267	egf	8469.XP_007054481.1	5.89e-262	778.0	KOG1215@1|root,KOG1215@2759|Eukaryota,38B7B@33154|Opisthokonta,3BHG1@33208|Metazoa,3CYG0@33213|Bilateria,488G4@7711|Chordata,490KQ@7742|Vertebrata,4CAW0@8459|Testudines	33208|Metazoa	T	Growth factor	EGF	GO:0000165,GO:0000186,GO:0000187,GO:0001525,GO:0001568,GO:0001654,GO:0001655,GO:0001763,GO:0001822,GO:0001932,GO:0001934,GO:0001944,GO:0002009,GO:0002090,GO:0002092,GO:0002576,GO:0002791,GO:0003002,GO:0003674,GO:0003824,GO:0004672,GO:0004713,GO:0004888,GO:0005085,GO:0005088,GO:0005102,GO:0005154,GO:0005488,GO:0005515,GO:0005575,GO:0005576,GO:0005615,GO:0005622,GO:0005623,GO:0005737,GO:0005886,GO:…	-	ko:K02599,ko:K04357,ko:K20051	ko01521,ko01522,ko04010,ko04012,ko04014,ko04015,ko04060,ko04066,ko04068,ko04072,ko04151,ko04320,ko04330,ko04510,ko04540,ko04630,ko04658,ko04810,ko04919,ko05020,ko05160,ko05165,ko05200,ko05206,ko05210,ko05212,ko05213,ko05214,ko05215,ko05218,ko05219,ko05223,ko05224,ko05226,ko05231,map01521,map01522,map04010,map04012,map04014,map04015,map04060,map04066,map04068,map04072,map04151,map04320,map04330,ma…	M00682	-	-	ko00000,ko00001,ko00002,ko04052,ko04131	-	-	-	DUF5050,EGF,EGF_CA,FXa_inhibition,Ldl_recept_b,cEGF
LEUER_T0000268	lrit3	7897.ENSLACP00000005303	5.82e-199	581.0	COG4886@1|root,KOG3510@1|root,KOG0619@2759|Eukaryota,KOG3510@2759|Eukaryota,39UNN@33154|Opisthokonta,3BG5E@33208|Metazoa,3CRCY@33213|Bilateria,486WA@7711|Chordata,48YGU@7742|Vertebrata	33208|Metazoa	T	regulation of fibroblast growth factor receptor signaling pathway	LRIT3	GO:0003008,GO:0007600,GO:0007601,GO:0008150,GO:0009966,GO:0010646,GO:0023051,GO:0032501,GO:0040036,GO:0048583,GO:0050789,GO:0050794,GO:0050877,GO:0050953,GO:0065007,GO:0090287	-	-	-	-	-	-	-	-	-	-	Ig_3,LRR_8,fn3
LEUER_T0000269	rrh	8479.XP_005287976.1	3.62e-183	516.0	KOG3656@1|root,KOG3656@2759|Eukaryota,39BG4@33154|Opisthokonta,3BCPP@33208|Metazoa,3D1D0@33213|Bilateria,47ZTQ@7711|Chordata,48USY@7742|Vertebrata,4CG0N@8459|Testudines	33208|Metazoa	S	Retinal pigment epithelium-derived rhodopsin homolog	RRH	GO:0001750,GO:0003008,GO:0003674,GO:0004888,GO:0004930,GO:0005575,GO:0005623,GO:0005886,GO:0005887,GO:0005929,GO:0007154,GO:0007165,GO:0007186,GO:0007600,GO:0007601,GO:0008020,GO:0008150,GO:0009314,GO:0009416,GO:0009581,GO:0009582,GO:0009583,GO:0009584,GO:0009605,GO:0009628,GO:0009881,GO:0009987,GO:0016020,GO:0016021,GO:0023052,GO:0031224,GO:0031226,GO:0032501,GO:0038023,GO:0042995,GO:0043005,GO:…	-	ko:K04253,ko:K04255,ko:K04256	-	-	-	-	ko00000,ko01009,ko04030	-	-	-	7tm_1
LEUER_T0000271	gar1	38654.XP_006025600.1	8.87e-65	206.0	COG3277@1|root,KOG3262@2759|Eukaryota,38HDD@33154|Opisthokonta,3BDCM@33208|Metazoa,3CUZU@33213|Bilateria,48A6C@7711|Chordata,48W5X@7742|Vertebrata	33208|Metazoa	J	Required for ribosome biogenesis. Part of a complex which catalyzes pseudouridylation of rRNA. This involves the isomerization of uridine such that the ribose is subsequently attached to C5, instead of the normal N1	GAR1	GO:0000154,GO:0000454,GO:0000723,GO:0001522,GO:0001650,GO:0001651,GO:0002376,GO:0002520,GO:0003674,GO:0003676,GO:0003723,GO:0005488,GO:0005575,GO:0005622,GO:0005623,GO:0005634,GO:0005654,GO:0005697,GO:0005730,GO:0005732,GO:0006139,GO:0006259,GO:0006278,GO:0006364,GO:0006396,GO:0006725,GO:0006807,GO:0006996,GO:0007004,GO:0007275,GO:0008150,GO:0008152,GO:0009058,GO:0009059,GO:0009451,GO:0009987,GO:…	-	ko:K11128	ko03008,map03008	M00425	-	-	ko00000,ko00001,ko00002,ko03009,ko03032	-	-	-	Gar1
LEUER_T0000270	gar1	38654.XP_006025600.1	8.87e-65	206.0	COG3277@1|root,KOG3262@2759|Eukaryota,38HDD@33154|Opisthokonta,3BDCM@33208|Metazoa,3CUZU@33213|Bilateria,48A6C@7711|Chordata,48W5X@7742|Vertebrata	33208|Metazoa	J	Required for ribosome biogenesis. Part of a complex which catalyzes pseudouridylation of rRNA. This involves the isomerization of uridine such that the ribose is subsequently attached to C5, instead of the normal N1	GAR1	GO:0000154,GO:0000454,GO:0000723,GO:0001522,GO:0001650,GO:0001651,GO:0002376,GO:0002520,GO:0003674,GO:0003676,GO:0003723,GO:0005488,GO:0005575,GO:0005622,GO:0005623,GO:0005634,GO:0005654,GO:0005697,GO:0005730,GO:0005732,GO:0006139,GO:0006259,GO:0006278,GO:0006364,GO:0006396,GO:0006725,GO:0006807,GO:0006996,GO:0007004,GO:0007275,GO:0008150,GO:0008152,GO:0009058,GO:0009059,GO:0009451,GO:0009987,GO:…	-	ko:K11128	ko03008,map03008	M00425	-	-	ko00000,ko00001,ko00002,ko03009,ko03032	-	-	-	Gar1
LEUER_T0000272	htra3	7897.ENSLACP00000012082	4.42e-231	649.0	COG0265@1|root,2QT3F@2759|Eukaryota,3AMS6@33154|Opisthokonta,3C0ID@33208|Metazoa,3DDXW@33213|Bilateria,481RY@7711|Chordata,492HV@7742|Vertebrata	33208|Metazoa	O	insulin-like growth factor binding	HTRA3	-	-	ko:K08785	-	-	-	-	ko00000,ko01000,ko01002,ko03110	-	-	-	IGFBP,Kazal_2,PDZ_2,Trypsin_2
LEUER_T0000273	htra3	7897.ENSLACP00000012082	4.42e-231	649.0	COG0265@1|root,2QT3F@2759|Eukaryota,3AMS6@33154|Opisthokonta,3C0ID@33208|Metazoa,3DDXW@33213|Bilateria,481RY@7711|Chordata,492HV@7742|Vertebrata	33208|Metazoa	O	insulin-like growth factor binding	HTRA3	-	-	ko:K08785	-	-	-	-	ko00000,ko01000,ko01002,ko03110	-	-	-	IGFBP,Kazal_2,PDZ_2,Trypsin_2
LEUER_T0000274	htra3	7897.ENSLACP00000012082	1.73e-230	647.0	COG0265@1|root,2QT3F@2759|Eukaryota,3AMS6@33154|Opisthokonta,3C0ID@33208|Metazoa,3DDXW@33213|Bilateria,481RY@7711|Chordata,492HV@7742|Vertebrata	33208|Metazoa	O	insulin-like growth factor binding	HTRA3	-	-	ko:K08785	-	-	-	-	ko00000,ko01000,ko01002,ko03110	-	-	-	IGFBP,Kazal_2,PDZ_2,Trypsin_2
LEUER_T0000275	trmt44	7897.ENSLACP00000007983	5.96e-255	725.0	KOG3790@1|root,KOG3790@2759|Eukaryota,38H1T@33154|Opisthokonta,3BASB@33208|Metazoa,3CT0J@33213|Bilateria,480RR@7711|Chordata,48Z61@7742|Vertebrata	33208|Metazoa	S	tRNA (uracil) methyltransferase activity	TRMT44	GO:0001510,GO:0003674,GO:0003824,GO:0006139,GO:0006396,GO:0006399,GO:0006400,GO:0006725,GO:0006807,GO:0008033,GO:0008150,GO:0008152,GO:0008168,GO:0008173,GO:0008175,GO:0009451,GO:0009987,GO:0010467,GO:0016070,GO:0016300,GO:0016740,GO:0016741,GO:0030488,GO:0032259,GO:0034470,GO:0034641,GO:0034660,GO:0043170,GO:0043412,GO:0043414,GO:0044237,GO:0044238,GO:0044260,GO:0046483,GO:0071704,GO:0090304,GO:…	2.1.1.211	ko:K15447	-	-	-	-	ko00000,ko01000,ko03016	-	-	-	AdoMet_MTase
LEUER_T0000276	LOC116971800	7897.ENSLACP00000006094	2.28e-200	560.0	KOG3656@1|root,KOG3656@2759|Eukaryota,38MPC@33154|Opisthokonta,3B95C@33208|Metazoa,3CYTT@33213|Bilateria,48081@7711|Chordata,48XEI@7742|Vertebrata	33208|Metazoa	S	adenylate cyclase-activating G-protein coupled receptor signaling pathway	GPR26	GO:0003674,GO:0004888,GO:0004930,GO:0005575,GO:0005623,GO:0005886,GO:0007154,GO:0007165,GO:0007186,GO:0007187,GO:0007188,GO:0007189,GO:0008150,GO:0009987,GO:0016020,GO:0019932,GO:0019933,GO:0019935,GO:0023052,GO:0035556,GO:0038023,GO:0044464,GO:0050789,GO:0050794,GO:0050896,GO:0051716,GO:0060089,GO:0065007,GO:0071944	-	ko:K08411	-	-	-	-	ko00000,ko04030	-	-	-	7tm_1
LEUER_T0000277	cpz	8479.XP_005309407.1	1.61e-286	803.0	KOG2649@1|root,KOG2649@2759|Eukaryota,38DE0@33154|Opisthokonta,3B9RU@33208|Metazoa,3CSI8@33213|Bilateria,48ABN@7711|Chordata,496N7@7742|Vertebrata,4CF2D@8459|Testudines	33208|Metazoa	S	Carboxypeptidase Z	CPZ	GO:0003674,GO:0003824,GO:0004180,GO:0004181,GO:0004185,GO:0005575,GO:0005576,GO:0005615,GO:0006508,GO:0006518,GO:0006807,GO:0008150,GO:0008152,GO:0008233,GO:0008235,GO:0008236,GO:0008237,GO:0008238,GO:0009987,GO:0010467,GO:0016485,GO:0016787,GO:0017171,GO:0019538,GO:0031012,GO:0034641,GO:0043170,GO:0043603,GO:0044237,GO:0044238,GO:0044421,GO:0051604,GO:0070008,GO:0070011,GO:0071704,GO:0140096,GO:…	3.4.17.10,3.4.17.22,3.4.17.3	ko:K01292,ko:K01294,ko:K07752,ko:K13022,ko:K21392	ko04940,map04940	-	-	-	ko00000,ko00001,ko01000,ko01002	-	-	-	CarboxypepD_reg,Fz,Peptidase_M14
LEUER_T0000278	cpz	8479.XP_005309407.1	2.01e-285	800.0	KOG2649@1|root,KOG2649@2759|Eukaryota,38DE0@33154|Opisthokonta,3B9RU@33208|Metazoa,3CSI8@33213|Bilateria,48ABN@7711|Chordata,496N7@7742|Vertebrata,4CF2D@8459|Testudines	33208|Metazoa	S	Carboxypeptidase Z	CPZ	GO:0003674,GO:0003824,GO:0004180,GO:0004181,GO:0004185,GO:0005575,GO:0005576,GO:0005615,GO:0006508,GO:0006518,GO:0006807,GO:0008150,GO:0008152,GO:0008233,GO:0008235,GO:0008236,GO:0008237,GO:0008238,GO:0009987,GO:0010467,GO:0016485,GO:0016787,GO:0017171,GO:0019538,GO:0031012,GO:0034641,GO:0043170,GO:0043603,GO:0044237,GO:0044238,GO:0044421,GO:0051604,GO:0070008,GO:0070011,GO:0071704,GO:0140096,GO:…	3.4.17.10,3.4.17.22,3.4.17.3	ko:K01292,ko:K01294,ko:K07752,ko:K13022,ko:K21392	ko04940,map04940	-	-	-	ko00000,ko00001,ko01000,ko01002	-	-	-	CarboxypepD_reg,Fz,Peptidase_M14
LEUER_T0000279	LOC116971810	7897.ENSLACP00000012755	2.57e-74	233.0	KOG0485@1|root,KOG0485@2759|Eukaryota,3A0CR@33154|Opisthokonta,3BPRM@33208|Metazoa,3D68D@33213|Bilateria,48EEN@7711|Chordata,49B9W@7742|Vertebrata	33208|Metazoa	K	Homeobox domain	-	-	-	ko:K09349	-	-	-	-	ko00000,ko03000	-	-	-	Homeobox
LEUER_T0000281	hmx1	13735.ENSPSIP00000016437	3.33e-97	295.0	KOG0485@1|root,KOG0485@2759|Eukaryota,3A449@33154|Opisthokonta,3BRDX@33208|Metazoa,3D26J@33213|Bilateria,485RT@7711|Chordata,4981K@7742|Vertebrata,4CC57@8459|Testudines	33208|Metazoa	K	Homeodomain	HMX1	GO:0000122,GO:0000976,GO:0000977,GO:0000981,GO:0001012,GO:0001067,GO:0001227,GO:0003674,GO:0003676,GO:0003677,GO:0003690,GO:0003700,GO:0005488,GO:0005575,GO:0005622,GO:0005623,GO:0005634,GO:0006355,GO:0006357,GO:0008150,GO:0009889,GO:0009890,GO:0009892,GO:0010468,GO:0010556,GO:0010558,GO:0010605,GO:0010629,GO:0019219,GO:0019222,GO:0031323,GO:0031324,GO:0031326,GO:0031327,GO:0043226,GO:0043227,GO:…	-	ko:K09349	-	-	-	-	ko00000,ko03000	-	-	-	Homeobox
LEUER_T0000282	LOC116971830	8469.XP_007067108.1	0.0	1592.0	COG0749@1|root,COG4581@1|root,KOG0949@2759|Eukaryota,KOG0950@2759|Eukaryota,38FA1@33154|Opisthokonta,3BAQM@33208|Metazoa,3CU37@33213|Bilateria,488C4@7711|Chordata,495TB@7742|Vertebrata,4CDF7@8459|Testudines	33208|Metazoa	A	ATP-dependent RNA helicase	DDX60	GO:0001817,GO:0001819,GO:0002682,GO:0002684,GO:0002697,GO:0002699,GO:0002831,GO:0002833,GO:0003674,GO:0003676,GO:0003677,GO:0003690,GO:0003723,GO:0003725,GO:0003727,GO:0005488,GO:0005575,GO:0005622,GO:0005623,GO:0005737,GO:0005829,GO:0005856,GO:0008150,GO:0009605,GO:0009607,GO:0009615,GO:0009966,GO:0009967,GO:0010646,GO:0010647,GO:0023051,GO:0023056,GO:0031347,GO:0031349,GO:0032101,GO:0032103,GO:…	3.6.4.13	ko:K20103	-	-	-	-	ko00000,ko01000,ko03019	-	-	-	DEAD,Helicase_C
LEUER_T0000283	LOC116971831	8479.XP_005313714.1	9.15e-73	273.0	KOG2177@1|root,KOG2177@2759|Eukaryota,39Y90@33154|Opisthokonta,3BACI@33208|Metazoa,3CZW1@33213|Bilateria,48C19@7711|Chordata,495SK@7742|Vertebrata,4CJNR@8459|Testudines	33208|Metazoa	O	zinc ion binding	-	-	-	-	-	-	-	-	-	-	-	-	zf-B_box,zf-RING_UBOX
LEUER_T0000285	anxa10	13616.ENSMODP00000003033	9.39e-145	416.0	KOG0819@1|root,KOG0819@2759|Eukaryota,39SMF@33154|Opisthokonta,3BH7K@33208|Metazoa,3D00E@33213|Bilateria,48980@7711|Chordata,48WIU@7742|Vertebrata,3J3R1@40674|Mammalia,4JZ66@9263|Metatheria	33208|Metazoa	U	Annexin A10	ANXA10	GO:0003674,GO:0005488,GO:0005509,GO:0043167,GO:0043169,GO:0046872	-	ko:K17097	-	-	-	-	ko00000,ko04147	1.A.31	-	-	Annexin
LEUER_T0000286	spock3	8479.XP_005307509.1	3.53e-204	577.0	KOG3555@1|root,KOG3555@2759|Eukaryota,39R6S@33154|Opisthokonta,3BFFB@33208|Metazoa,3D1D1@33213|Bilateria,48AQK@7711|Chordata,496HC@7742|Vertebrata,4CCC9@8459|Testudines	33208|Metazoa	S	Secreted protein acidic and rich in cysteine Ca binding region	SPOCK3	GO:0003002,GO:0003674,GO:0004857,GO:0004866,GO:0005488,GO:0005515,GO:0005539,GO:0005575,GO:0005576,GO:0005615,GO:0006022,GO:0006029,GO:0006082,GO:0006464,GO:0006790,GO:0006807,GO:0006810,GO:0006858,GO:0007275,GO:0007350,GO:0007365,GO:0007367,GO:0007389,GO:0007444,GO:0007447,GO:0007450,GO:0008104,GO:0008150,GO:0008152,GO:0008191,GO:0009100,GO:0009790,GO:0009880,GO:0009888,GO:0009892,GO:0009953,GO:…	-	ko:K08136	-	-	-	-	ko00000,ko00535	-	-	-	Kazal_2,SPARC_Ca_bdg,Thyroglobulin_1
LEUER_T0000289	tll1	8479.XP_005307503.1	0.0	1850.0	KOG3714@1|root,KOG3714@2759|Eukaryota,38H9H@33154|Opisthokonta,3BFXI@33208|Metazoa,3CRSI@33213|Bilateria,4843H@7711|Chordata,48UYS@7742|Vertebrata,4C9I1@8459|Testudines	33208|Metazoa	O	Astacin (Peptidase family M12A)	TLL1	GO:0000003,GO:0000578,GO:0000902,GO:0000904,GO:0001501,GO:0001568,GO:0001703,GO:0001704,GO:0001707,GO:0001885,GO:0001944,GO:0002009,GO:0002064,GO:0002165,GO:0002376,GO:0002520,GO:0003002,GO:0003006,GO:0003158,GO:0003674,GO:0003824,GO:0004175,GO:0004222,GO:0004252,GO:0005488,GO:0005518,GO:0005575,GO:0005576,GO:0006355,GO:0006357,GO:0006508,GO:0006807,GO:0006928,GO:0006935,GO:0007154,GO:0007165,GO:…	3.4.24.19,3.4.24.21	ko:K05502,ko:K08076,ko:K09608,ko:K13045,ko:K13046,ko:K13047	-	-	-	-	ko00000,ko01000,ko01002,ko04052	-	-	-	Astacin,CUB,EGF_CA,FXa_inhibition
LEUER_T0000287	tll1	8469.XP_007067105.1	0.0	1896.0	KOG3714@1|root,KOG3714@2759|Eukaryota,38H9H@33154|Opisthokonta,3BFXI@33208|Metazoa,3CRSI@33213|Bilateria,4843H@7711|Chordata,48UYS@7742|Vertebrata,4C9I1@8459|Testudines	33208|Metazoa	O	Astacin (Peptidase family M12A)	TLL1	GO:0000003,GO:0000578,GO:0000902,GO:0000904,GO:0001501,GO:0001568,GO:0001703,GO:0001704,GO:0001707,GO:0001885,GO:0001944,GO:0002009,GO:0002064,GO:0002165,GO:0002376,GO:0002520,GO:0003002,GO:0003006,GO:0003158,GO:0003674,GO:0003824,GO:0004175,GO:0004222,GO:0004252,GO:0005488,GO:0005518,GO:0005575,GO:0005576,GO:0006355,GO:0006357,GO:0006508,GO:0006807,GO:0006928,GO:0006935,GO:0007154,GO:0007165,GO:…	3.4.24.19,3.4.24.21	ko:K05502,ko:K08076,ko:K09608,ko:K13045,ko:K13046,ko:K13047	-	-	-	-	ko00000,ko01000,ko01002,ko04052	-	-	-	Astacin,CUB,EGF_CA,FXa_inhibition
LEUER_T0000288	tll1	8469.XP_007067105.1	0.0	1896.0	KOG3714@1|root,KOG3714@2759|Eukaryota,38H9H@33154|Opisthokonta,3BFXI@33208|Metazoa,3CRSI@33213|Bilateria,4843H@7711|Chordata,48UYS@7742|Vertebrata,4C9I1@8459|Testudines	33208|Metazoa	O	Astacin (Peptidase family M12A)	TLL1	GO:0000003,GO:0000578,GO:0000902,GO:0000904,GO:0001501,GO:0001568,GO:0001703,GO:0001704,GO:0001707,GO:0001885,GO:0001944,GO:0002009,GO:0002064,GO:0002165,GO:0002376,GO:0002520,GO:0003002,GO:0003006,GO:0003158,GO:0003674,GO:0003824,GO:0004175,GO:0004222,GO:0004252,GO:0005488,GO:0005518,GO:0005575,GO:0005576,GO:0006355,GO:0006357,GO:0006508,GO:0006807,GO:0006928,GO:0006935,GO:0007154,GO:0007165,GO:…	3.4.24.19,3.4.24.21	ko:K05502,ko:K08076,ko:K09608,ko:K13045,ko:K13046,ko:K13047	-	-	-	-	ko00000,ko01000,ko01002,ko04052	-	-	-	Astacin,CUB,EGF_CA,FXa_inhibition
LEUER_T0000291	cpe	52644.XP_010584577.1	2.44e-275	759.0	KOG2649@1|root,KOG2649@2759|Eukaryota,38DE0@33154|Opisthokonta,3B9RU@33208|Metazoa,3CSI8@33213|Bilateria,47ZIK@7711|Chordata,492AU@7742|Vertebrata,4GNHW@8782|Aves	33208|Metazoa	S	Carboxypeptidase E	CPE	GO:0001505,GO:0001956,GO:0003007,GO:0003205,GO:0003206,GO:0003208,GO:0003214,GO:0003231,GO:0003674,GO:0003824,GO:0004180,GO:0004181,GO:0004185,GO:0005102,GO:0005488,GO:0005515,GO:0005575,GO:0005576,GO:0005615,GO:0005622,GO:0005623,GO:0005737,GO:0005794,GO:0005886,GO:0006464,GO:0006508,GO:0006518,GO:0006807,GO:0006810,GO:0006811,GO:0006812,GO:0006836,GO:0006937,GO:0007154,GO:0007165,GO:0007166,GO:…	3.4.17.10,3.4.17.22,3.4.17.3	ko:K01292,ko:K01294,ko:K07752	ko04940,map04940	-	-	-	ko00000,ko00001,ko01000,ko01002	-	-	-	CarboxypepD_reg,Peptidase_M14
LEUER_T0000292	cpe	52644.XP_010584577.1	6.44e-273	753.0	KOG2649@1|root,KOG2649@2759|Eukaryota,38DE0@33154|Opisthokonta,3B9RU@33208|Metazoa,3CSI8@33213|Bilateria,47ZIK@7711|Chordata,492AU@7742|Vertebrata,4GNHW@8782|Aves	33208|Metazoa	S	Carboxypeptidase E	CPE	GO:0001505,GO:0001956,GO:0003007,GO:0003205,GO:0003206,GO:0003208,GO:0003214,GO:0003231,GO:0003674,GO:0003824,GO:0004180,GO:0004181,GO:0004185,GO:0005102,GO:0005488,GO:0005515,GO:0005575,GO:0005576,GO:0005615,GO:0005622,GO:0005623,GO:0005737,GO:0005794,GO:0005886,GO:0006464,GO:0006508,GO:0006518,GO:0006807,GO:0006810,GO:0006811,GO:0006812,GO:0006836,GO:0006937,GO:0007154,GO:0007165,GO:0007166,GO:…	3.4.17.10,3.4.17.22,3.4.17.3	ko:K01292,ko:K01294,ko:K07752	ko04940,map04940	-	-	-	ko00000,ko00001,ko01000,ko01002	-	-	-	CarboxypepD_reg,Peptidase_M14
LEUER_T0000293	msmo1	7918.ENSLOCP00000009571	7.28e-186	519.0	COG3000@1|root,KOG0873@2759|Eukaryota,38C6I@33154|Opisthokonta,3BF0U@33208|Metazoa,3CREK@33213|Bilateria,4828J@7711|Chordata,496Z0@7742|Vertebrata,49UXZ@7898|Actinopterygii	33208|Metazoa	I	Methylsterol monooxygenase 1	MSMO1	GO:0000254,GO:0003674,GO:0003824,GO:0004497,GO:0005575,GO:0005622,GO:0005623,GO:0005737,GO:0005783,GO:0005789,GO:0005886,GO:0006066,GO:0006082,GO:0006629,GO:0006631,GO:0006694,GO:0006695,GO:0008150,GO:0008152,GO:0008202,GO:0008203,GO:0008610,GO:0009058,GO:0009987,GO:0012505,GO:0016020,GO:0016021,GO:0016125,GO:0016126,GO:0016491,GO:0016705,GO:0016709,GO:0019752,GO:0031224,GO:0031984,GO:0032787,GO:…	1.14.18.9	ko:K07750,ko:K22282	ko00100,ko01100,ko01130,map00100,map01100,map01130	M00101	R07509,R10057	RC01952	ko00000,ko00001,ko00002,ko01000	-	-	-	FA_hydroxylase
LEUER_T0000295	klhl2	7918.ENSLOCP00000009594	6.74e-222	635.0	KOG4441@1|root,KOG4441@2759|Eukaryota,38FPI@33154|Opisthokonta,3BB3K@33208|Metazoa,3CS4P@33213|Bilateria,480RN@7711|Chordata,48VE6@7742|Vertebrata,4A2JC@7898|Actinopterygii	33208|Metazoa	T	Kelch-like family member 2	KLHL2	GO:0000003,GO:0000151,GO:0001725,GO:0003006,GO:0003674,GO:0003779,GO:0005488,GO:0005515,GO:0005575,GO:0005576,GO:0005622,GO:0005623,GO:0005737,GO:0005829,GO:0005856,GO:0006464,GO:0006807,GO:0006810,GO:0006996,GO:0007010,GO:0007049,GO:0007275,GO:0007276,GO:0007281,GO:0007292,GO:0007293,GO:0007300,GO:0007301,GO:0007349,GO:0008092,GO:0008150,GO:0008152,GO:0009653,GO:0009987,GO:0015629,GO:0016043,GO:…	-	ko:K10443,ko:K10457	-	-	-	-	ko00000,ko04121	-	-	-	BACK,BTB,Kelch_1
LEUER_T0000294	klhl2	7918.ENSLOCP00000009594	1.06e-226	648.0	KOG4441@1|root,KOG4441@2759|Eukaryota,38FPI@33154|Opisthokonta,3BB3K@33208|Metazoa,3CS4P@33213|Bilateria,480RN@7711|Chordata,48VE6@7742|Vertebrata,4A2JC@7898|Actinopterygii	33208|Metazoa	T	Kelch-like family member 2	KLHL2	GO:0000003,GO:0000151,GO:0001725,GO:0003006,GO:0003674,GO:0003779,GO:0005488,GO:0005515,GO:0005575,GO:0005576,GO:0005622,GO:0005623,GO:0005737,GO:0005829,GO:0005856,GO:0006464,GO:0006807,GO:0006810,GO:0006996,GO:0007010,GO:0007049,GO:0007275,GO:0007276,GO:0007281,GO:0007292,GO:0007293,GO:0007300,GO:0007301,GO:0007349,GO:0008092,GO:0008150,GO:0008152,GO:0009653,GO:0009987,GO:0015629,GO:0016043,GO:…	-	ko:K10443,ko:K10457	-	-	-	-	ko00000,ko04121	-	-	-	BACK,BTB,Kelch_1
LEUER_T0000297	tmem192	8496.XP_006273146.1	8.41e-72	228.0	2AE7V@1|root,2RYVA@2759|Eukaryota,39Y9X@33154|Opisthokonta,3BHJP@33208|Metazoa,3CYW0@33213|Bilateria,489T3@7711|Chordata,490J3@7742|Vertebrata	33208|Metazoa	S	TMEM192 family	TMEM192	GO:0000323,GO:0003674,GO:0005488,GO:0005515,GO:0005575,GO:0005622,GO:0005623,GO:0005634,GO:0005654,GO:0005737,GO:0005764,GO:0005765,GO:0005768,GO:0005770,GO:0005773,GO:0005774,GO:0012505,GO:0016020,GO:0031090,GO:0031410,GO:0031974,GO:0031981,GO:0031982,GO:0042802,GO:0042803,GO:0043226,GO:0043227,GO:0043229,GO:0043231,GO:0043233,GO:0044422,GO:0044424,GO:0044428,GO:0044437,GO:0044444,GO:0044446,GO:…	-	-	-	-	-	-	-	-	-	-	TMEM192
LEUER_T0000298	tmem192	7994.ENSAMXP00000018719	4.16e-33	125.0	2AE7V@1|root,2RYVA@2759|Eukaryota,39Y9X@33154|Opisthokonta,3BHJP@33208|Metazoa,3CYW0@33213|Bilateria,489T3@7711|Chordata,490J3@7742|Vertebrata,4A8R8@7898|Actinopterygii	33208|Metazoa	U	Transmembrane protein 192	TMEM192	GO:0000323,GO:0003674,GO:0005488,GO:0005515,GO:0005575,GO:0005622,GO:0005623,GO:0005634,GO:0005654,GO:0005737,GO:0005764,GO:0005765,GO:0005768,GO:0005770,GO:0005773,GO:0005774,GO:0012505,GO:0016020,GO:0031090,GO:0031410,GO:0031974,GO:0031981,GO:0031982,GO:0042802,GO:0042803,GO:0043226,GO:0043227,GO:0043229,GO:0043231,GO:0043233,GO:0044422,GO:0044424,GO:0044428,GO:0044437,GO:0044444,GO:0044446,GO:…	-	-	-	-	-	-	-	-	-	-	TMEM192
LEUER_T0000299	tmem192	7994.ENSAMXP00000018719	3.88e-33	125.0	2AE7V@1|root,2RYVA@2759|Eukaryota,39Y9X@33154|Opisthokonta,3BHJP@33208|Metazoa,3CYW0@33213|Bilateria,489T3@7711|Chordata,490J3@7742|Vertebrata,4A8R8@7898|Actinopterygii	33208|Metazoa	U	Transmembrane protein 192	TMEM192	GO:0000323,GO:0003674,GO:0005488,GO:0005515,GO:0005575,GO:0005622,GO:0005623,GO:0005634,GO:0005654,GO:0005737,GO:0005764,GO:0005765,GO:0005768,GO:0005770,GO:0005773,GO:0005774,GO:0012505,GO:0016020,GO:0031090,GO:0031410,GO:0031974,GO:0031981,GO:0031982,GO:0042802,GO:0042803,GO:0043226,GO:0043227,GO:0043229,GO:0043231,GO:0043233,GO:0044422,GO:0044424,GO:0044428,GO:0044437,GO:0044444,GO:0044446,GO:…	-	-	-	-	-	-	-	-	-	-	TMEM192
LEUER_T0000300	tmem192	8496.XP_006273146.1	9.03e-72	228.0	2AE7V@1|root,2RYVA@2759|Eukaryota,39Y9X@33154|Opisthokonta,3BHJP@33208|Metazoa,3CYW0@33213|Bilateria,489T3@7711|Chordata,490J3@7742|Vertebrata	33208|Metazoa	S	TMEM192 family	TMEM192	GO:0000323,GO:0003674,GO:0005488,GO:0005515,GO:0005575,GO:0005622,GO:0005623,GO:0005634,GO:0005654,GO:0005737,GO:0005764,GO:0005765,GO:0005768,GO:0005770,GO:0005773,GO:0005774,GO:0012505,GO:0016020,GO:0031090,GO:0031410,GO:0031974,GO:0031981,GO:0031982,GO:0042802,GO:0042803,GO:0043226,GO:0043227,GO:0043229,GO:0043231,GO:0043233,GO:0044422,GO:0044424,GO:0044428,GO:0044437,GO:0044444,GO:0044446,GO:…	-	-	-	-	-	-	-	-	-	-	TMEM192
LEUER_T0000301	apela	9597.XP_008966455.1	5.58e-16	70.9	2BXXH@1|root,2TDEQ@2759|Eukaryota,3ATJI@33154|Opisthokonta,3C4TJ@33208|Metazoa,3DBKE@33213|Bilateria,48GPK@7711|Chordata,49DPE@7742|Vertebrata,3JIC0@40674|Mammalia,35R4P@314146|Euarchontoglires,4MNNX@9443|Primates,4N97Q@9604|Hominidae	33208|Metazoa	T	apelin receptor early endogenous ligand	APELA	GO:0000003,GO:0001568,GO:0001570,GO:0001664,GO:0001667,GO:0001704,GO:0001707,GO:0001890,GO:0001932,GO:0001934,GO:0001936,GO:0001938,GO:0001944,GO:0002090,GO:0002092,GO:0003006,GO:0003674,GO:0005102,GO:0005179,GO:0005488,GO:0005515,GO:0005575,GO:0005576,GO:0005615,GO:0006928,GO:0007154,GO:0007165,GO:0007166,GO:0007167,GO:0007178,GO:0007186,GO:0007275,GO:0007369,GO:0007492,GO:0007498,GO:0007507,GO:…	-	-	-	-	-	-	-	-	-	-	-
LEUER_T0000302	tada2b	9818.XP_007954494.1	2.74e-205	584.0	COG5114@1|root,KOG0457@2759|Eukaryota,38BI9@33154|Opisthokonta,3BB6X@33208|Metazoa,3CTG0@33213|Bilateria,485EX@7711|Chordata,48V34@7742|Vertebrata,3JCB9@40674|Mammalia,355BH@311790|Afrotheria	33208|Metazoa	B	Transcriptional adapter 2-beta	TADA2B	GO:0000123,GO:0000124,GO:0000981,GO:0003002,GO:0003674,GO:0003682,GO:0003700,GO:0003712,GO:0003713,GO:0003824,GO:0005488,GO:0005515,GO:0005575,GO:0005622,GO:0005623,GO:0005634,GO:0005654,GO:0005694,GO:0005700,GO:0006325,GO:0006338,GO:0006355,GO:0006357,GO:0006464,GO:0006473,GO:0006475,GO:0006508,GO:0006807,GO:0006996,GO:0007275,GO:0007389,GO:0007444,GO:0007447,GO:0008150,GO:0008152,GO:0008233,GO:…	-	ko:K15127,ko:K20167	-	-	-	-	ko00000,ko03021,ko03036,ko04131	-	-	-	Myb_DNA-binding,ZZ
LEUER_T0000303	sorcs2	8479.XP_008177618.1	0.0	1455.0	KOG3511@1|root,KOG3511@2759|Eukaryota,38E47@33154|Opisthokonta,3BFZV@33208|Metazoa,3CZXA@33213|Bilateria,481R0@7711|Chordata,496IQ@7742|Vertebrata,4CHB0@8459|Testudines	33208|Metazoa	U	VPS10 domain-containing receptor SorCS2	SORCS2	GO:0001653,GO:0003674,GO:0004888,GO:0004930,GO:0005575,GO:0007154,GO:0007165,GO:0007186,GO:0007218,GO:0008150,GO:0008188,GO:0008528,GO:0009987,GO:0016020,GO:0023052,GO:0038023,GO:0050789,GO:0050794,GO:0050896,GO:0051716,GO:0060089,GO:0065007	-	-	-	-	-	-	-	-	-	-	PKD,Sortilin-Vps10,Sortilin_C
LEUER_T0000304	sorcs2	8479.XP_008177618.1	0.0	1453.0	KOG3511@1|root,KOG3511@2759|Eukaryota,38E47@33154|Opisthokonta,3BFZV@33208|Metazoa,3CZXA@33213|Bilateria,481R0@7711|Chordata,496IQ@7742|Vertebrata,4CHB0@8459|Testudines	33208|Metazoa	U	VPS10 domain-containing receptor SorCS2	SORCS2	GO:0001653,GO:0003674,GO:0004888,GO:0004930,GO:0005575,GO:0007154,GO:0007165,GO:0007186,GO:0007218,GO:0008150,GO:0008188,GO:0008528,GO:0009987,GO:0016020,GO:0023052,GO:0038023,GO:0050789,GO:0050794,GO:0050896,GO:0051716,GO:0060089,GO:0065007	-	-	-	-	-	-	-	-	-	-	PKD,Sortilin-Vps10,Sortilin_C
LEUER_T0000308	afap1	128390.XP_009469410.1	0.0	1042.0	28I7R@1|root,2QQI1@2759|Eukaryota,39SAC@33154|Opisthokonta,3BF1P@33208|Metazoa,3CZBV@33213|Bilateria,480QB@7711|Chordata,48UVN@7742|Vertebrata,4GSDT@8782|Aves	33208|Metazoa	Z	Actin filament-associated protein 1 isoform X1	AFAP1	GO:0003674,GO:0005488,GO:0005515,GO:0005575,GO:0005622,GO:0005623,GO:0005737,GO:0005829,GO:0005856,GO:0005884,GO:0005886,GO:0005912,GO:0005924,GO:0005925,GO:0006464,GO:0006468,GO:0006793,GO:0006796,GO:0006807,GO:0007154,GO:0007165,GO:0008150,GO:0008152,GO:0009605,GO:0009612,GO:0009628,GO:0009966,GO:0009987,GO:0010646,GO:0015629,GO:0016020,GO:0016310,GO:0017124,GO:0018108,GO:0018109,GO:0018193,GO:…	-	ko:K18616	-	-	-	-	ko00000,ko04812	-	-	-	PH
LEUER_T0000307	afap1	128390.XP_009469410.1	0.0	1042.0	28I7R@1|root,2QQI1@2759|Eukaryota,39SAC@33154|Opisthokonta,3BF1P@33208|Metazoa,3CZBV@33213|Bilateria,480QB@7711|Chordata,48UVN@7742|Vertebrata,4GSDT@8782|Aves	33208|Metazoa	Z	Actin filament-associated protein 1 isoform X1	AFAP1	GO:0003674,GO:0005488,GO:0005515,GO:0005575,GO:0005622,GO:0005623,GO:0005737,GO:0005829,GO:0005856,GO:0005884,GO:0005886,GO:0005912,GO:0005924,GO:0005925,GO:0006464,GO:0006468,GO:0006793,GO:0006796,GO:0006807,GO:0007154,GO:0007165,GO:0008150,GO:0008152,GO:0009605,GO:0009612,GO:0009628,GO:0009966,GO:0009987,GO:0010646,GO:0015629,GO:0016020,GO:0016310,GO:0017124,GO:0018108,GO:0018109,GO:0018193,GO:…	-	ko:K18616	-	-	-	-	ko00000,ko04812	-	-	-	PH
LEUER_T0000309	afap1	7897.ENSLACP00000017939	0.0	1006.0	28I7R@1|root,2QQI1@2759|Eukaryota,39SAC@33154|Opisthokonta,3BF1P@33208|Metazoa,3CZBV@33213|Bilateria,480QB@7711|Chordata,48UVN@7742|Vertebrata	33208|Metazoa	T	SH2 domain binding	AFAP1	GO:0003674,GO:0005488,GO:0005515,GO:0005575,GO:0005622,GO:0005623,GO:0005737,GO:0005829,GO:0005856,GO:0005884,GO:0005886,GO:0005912,GO:0005924,GO:0005925,GO:0006464,GO:0006468,GO:0006793,GO:0006796,GO:0006807,GO:0007154,GO:0007165,GO:0008150,GO:0008152,GO:0009605,GO:0009612,GO:0009628,GO:0009966,GO:0009987,GO:0010646,GO:0015629,GO:0016020,GO:0016310,GO:0017124,GO:0018108,GO:0018109,GO:0018193,GO:…	-	ko:K18616	-	-	-	-	ko00000,ko04812	-	-	-	PH
LEUER_T0000305	afap1	128390.XP_009469410.1	0.0	1040.0	28I7R@1|root,2QQI1@2759|Eukaryota,39SAC@33154|Opisthokonta,3BF1P@33208|Metazoa,3CZBV@33213|Bilateria,480QB@7711|Chordata,48UVN@7742|Vertebrata,4GSDT@8782|Aves	33208|Metazoa	Z	Actin filament-associated protein 1 isoform X1	AFAP1	GO:0003674,GO:0005488,GO:0005515,GO:0005575,GO:0005622,GO:0005623,GO:0005737,GO:0005829,GO:0005856,GO:0005884,GO:0005886,GO:0005912,GO:0005924,GO:0005925,GO:0006464,GO:0006468,GO:0006793,GO:0006796,GO:0006807,GO:0007154,GO:0007165,GO:0008150,GO:0008152,GO:0009605,GO:0009612,GO:0009628,GO:0009966,GO:0009987,GO:0010646,GO:0015629,GO:0016020,GO:0016310,GO:0017124,GO:0018108,GO:0018109,GO:0018193,GO:…	-	ko:K18616	-	-	-	-	ko00000,ko04812	-	-	-	PH
LEUER_T0000306	afap1	128390.XP_009469410.1	0.0	1034.0	28I7R@1|root,2QQI1@2759|Eukaryota,39SAC@33154|Opisthokonta,3BF1P@33208|Metazoa,3CZBV@33213|Bilateria,480QB@7711|Chordata,48UVN@7742|Vertebrata,4GSDT@8782|Aves	33208|Metazoa	Z	Actin filament-associated protein 1 isoform X1	AFAP1	GO:0003674,GO:0005488,GO:0005515,GO:0005575,GO:0005622,GO:0005623,GO:0005737,GO:0005829,GO:0005856,GO:0005884,GO:0005886,GO:0005912,GO:0005924,GO:0005925,GO:0006464,GO:0006468,GO:0006793,GO:0006796,GO:0006807,GO:0007154,GO:0007165,GO:0008150,GO:0008152,GO:0009605,GO:0009612,GO:0009628,GO:0009966,GO:0009987,GO:0010646,GO:0015629,GO:0016020,GO:0016310,GO:0017124,GO:0018108,GO:0018109,GO:0018193,GO:…	-	ko:K18616	-	-	-	-	ko00000,ko04812	-	-	-	PH
LEUER_T0000310	msrb2	7897.ENSLACP00000016069	4.73e-37	130.0	COG0229@1|root,KOG0856@2759|Eukaryota,3A0GN@33154|Opisthokonta,3BPK7@33208|Metazoa,3D6BQ@33213|Bilateria,48EB7@7711|Chordata,498NZ@7742|Vertebrata	33208|Metazoa	O	L-methionine-(R)-S-oxide reductase activity	MSRB2	GO:0003674,GO:0003779,GO:0003824,GO:0005488,GO:0005515,GO:0005575,GO:0005622,GO:0005623,GO:0005737,GO:0005739,GO:0006807,GO:0006996,GO:0007010,GO:0007015,GO:0008092,GO:0008150,GO:0008152,GO:0008154,GO:0008270,GO:0009987,GO:0016043,GO:0016491,GO:0016667,GO:0016671,GO:0019538,GO:0022607,GO:0030029,GO:0030036,GO:0030041,GO:0030091,GO:0033743,GO:0034622,GO:0043167,GO:0043169,GO:0043170,GO:0043226,GO:…	1.8.4.12	ko:K07305	-	-	-	-	ko00000,ko01000	-	-	-	SelR
LEUER_T0000311	armc3	128390.XP_009467308.1	3.09e-180	546.0	KOG0167@1|root,KOG0167@2759|Eukaryota,38BE5@33154|Opisthokonta,3BBKT@33208|Metazoa,3CS2W@33213|Bilateria,482CW@7711|Chordata,49644@7742|Vertebrata,4GSV3@8782|Aves	33208|Metazoa	S	Armadillo repeat-containing protein 3	ARMC3	GO:0005575,GO:0005622,GO:0005623,GO:0005634,GO:0005737,GO:0043226,GO:0043227,GO:0043229,GO:0043231,GO:0044424,GO:0044464	-	-	-	-	-	-	-	-	-	-	Arm,EDR1,HEAT_2
LEUER_T0000312	armc3	128390.XP_009467308.1	1.09e-183	555.0	KOG0167@1|root,KOG0167@2759|Eukaryota,38BE5@33154|Opisthokonta,3BBKT@33208|Metazoa,3CS2W@33213|Bilateria,482CW@7711|Chordata,49644@7742|Vertebrata,4GSV3@8782|Aves	33208|Metazoa	S	Armadillo repeat-containing protein 3	ARMC3	GO:0005575,GO:0005622,GO:0005623,GO:0005634,GO:0005737,GO:0043226,GO:0043227,GO:0043229,GO:0043231,GO:0044424,GO:0044464	-	-	-	-	-	-	-	-	-	-	Arm,EDR1,HEAT_2
LEUER_T0000313	armc3	128390.XP_009467308.1	2.9e-167	512.0	KOG0167@1|root,KOG0167@2759|Eukaryota,38BE5@33154|Opisthokonta,3BBKT@33208|Metazoa,3CS2W@33213|Bilateria,482CW@7711|Chordata,49644@7742|Vertebrata,4GSV3@8782|Aves	33208|Metazoa	S	Armadillo repeat-containing protein 3	ARMC3	GO:0005575,GO:0005622,GO:0005623,GO:0005634,GO:0005737,GO:0043226,GO:0043227,GO:0043229,GO:0043231,GO:0044424,GO:0044464	-	-	-	-	-	-	-	-	-	-	Arm,EDR1,HEAT_2
LEUER_T0000314	armc3	128390.XP_009467308.1	6.07e-154	476.0	KOG0167@1|root,KOG0167@2759|Eukaryota,38BE5@33154|Opisthokonta,3BBKT@33208|Metazoa,3CS2W@33213|Bilateria,482CW@7711|Chordata,49644@7742|Vertebrata,4GSV3@8782|Aves	33208|Metazoa	S	Armadillo repeat-containing protein 3	ARMC3	GO:0005575,GO:0005622,GO:0005623,GO:0005634,GO:0005737,GO:0043226,GO:0043227,GO:0043229,GO:0043231,GO:0044424,GO:0044464	-	-	-	-	-	-	-	-	-	-	Arm,EDR1,HEAT_2
LEUER_T0000315	ablim2	38654.XP_006017093.1	1.87e-313	873.0	KOG1044@1|root,KOG1044@2759|Eukaryota,38END@33154|Opisthokonta,3BDZB@33208|Metazoa,3CVC4@33213|Bilateria,484GU@7711|Chordata,497ZG@7742|Vertebrata	33208|Metazoa	TZ	Actin binding LIM protein family member 2	ABLIM2	GO:0000902,GO:0000904,GO:0003674,GO:0003779,GO:0005488,GO:0005515,GO:0005575,GO:0005622,GO:0005623,GO:0005737,GO:0005856,GO:0005886,GO:0006355,GO:0006357,GO:0006928,GO:0006935,GO:0007275,GO:0007399,GO:0007409,GO:0007411,GO:0008092,GO:0008150,GO:0009605,GO:0009653,GO:0009889,GO:0009891,GO:0009893,GO:0009925,GO:0009987,GO:0010468,GO:0010556,GO:0010557,GO:0010591,GO:0010604,GO:0010628,GO:0015629,GO:…	-	ko:K07520	ko04360,map04360	-	-	-	ko00000,ko00001	-	-	-	AbLIM_anchor,LIM,VHP
LEUER_T0000316	ablim2	9031.ENSGALP00000025042	2.95e-293	823.0	KOG1044@1|root,KOG1044@2759|Eukaryota,38END@33154|Opisthokonta,3BDZB@33208|Metazoa,3CVC4@33213|Bilateria,484GU@7711|Chordata,497ZG@7742|Vertebrata,4GS37@8782|Aves	33208|Metazoa	TZ	Actin binding LIM protein family member 2	ABLIM2	GO:0000902,GO:0000904,GO:0003674,GO:0003779,GO:0005488,GO:0005515,GO:0005575,GO:0005622,GO:0005623,GO:0005737,GO:0005856,GO:0005886,GO:0006355,GO:0006357,GO:0006928,GO:0006935,GO:0007275,GO:0007399,GO:0007409,GO:0007411,GO:0008092,GO:0008150,GO:0009605,GO:0009653,GO:0009889,GO:0009891,GO:0009893,GO:0009925,GO:0009987,GO:0010468,GO:0010556,GO:0010557,GO:0010591,GO:0010604,GO:0010628,GO:0015629,GO:…	-	ko:K07520	ko04360,map04360	-	-	-	ko00000,ko00001	-	-	-	AbLIM_anchor,LIM,VHP
LEUER_T0000317	ablim2	9031.ENSGALP00000025042	3.22e-282	794.0	KOG1044@1|root,KOG1044@2759|Eukaryota,38END@33154|Opisthokonta,3BDZB@33208|Metazoa,3CVC4@33213|Bilateria,484GU@7711|Chordata,497ZG@7742|Vertebrata,4GS37@8782|Aves	33208|Metazoa	TZ	Actin binding LIM protein family member 2	ABLIM2	GO:0000902,GO:0000904,GO:0003674,GO:0003779,GO:0005488,GO:0005515,GO:0005575,GO:0005622,GO:0005623,GO:0005737,GO:0005856,GO:0005886,GO:0006355,GO:0006357,GO:0006928,GO:0006935,GO:0007275,GO:0007399,GO:0007409,GO:0007411,GO:0008092,GO:0008150,GO:0009605,GO:0009653,GO:0009889,GO:0009891,GO:0009893,GO:0009925,GO:0009987,GO:0010468,GO:0010556,GO:0010557,GO:0010591,GO:0010604,GO:0010628,GO:0015629,GO:…	-	ko:K07520	ko04360,map04360	-	-	-	ko00000,ko00001	-	-	-	AbLIM_anchor,LIM,VHP
LEUER_T0000318	LOC116975100	10090.ENSMUSP00000029353	3.28e-149	444.0	COG5064@1|root,KOG0166@2759|Eukaryota,38CKN@33154|Opisthokonta,3BCCF@33208|Metazoa,3CR5A@33213|Bilateria,484AB@7711|Chordata,48XJQ@7742|Vertebrata,3J891@40674|Mammalia,35DQA@314146|Euarchontoglires,4Q0A9@9989|Rodentia	33208|Metazoa	U	Importin subunit	KPNA4	GO:0000003,GO:0000280,GO:0000302,GO:0002119,GO:0002164,GO:0003006,GO:0003674,GO:0005048,GO:0005102,GO:0005112,GO:0005215,GO:0005488,GO:0005515,GO:0005575,GO:0005622,GO:0005623,GO:0005634,GO:0005635,GO:0005643,GO:0005654,GO:0005737,GO:0005829,GO:0006606,GO:0006607,GO:0006810,GO:0006886,GO:0006913,GO:0006950,GO:0006979,GO:0006996,GO:0006997,GO:0006999,GO:0007049,GO:0007127,GO:0007275,GO:0007276,GO:…	-	-	-	-	-	-	-	-	-	-	Arm,Arm_3,IBB
LEUER_T0000319	sh3tc1	7897.ENSLACP00000013929	0.0	1216.0	2CB1T@1|root,2QUY4@2759|Eukaryota,38H91@33154|Opisthokonta,3BDJF@33208|Metazoa,3CXK8@33213|Bilateria,483DK@7711|Chordata,49007@7742|Vertebrata	33208|Metazoa	T	SH3 domain and tetratricopeptide	SH3TC1	-	-	-	-	-	-	-	-	-	-	-	SH3_1,TPR_12,TPR_7,TPR_8
LEUER_T0000321	LOC116972096	52644.XP_010559359.1	2.21e-85	267.0	KOG2966@1|root,KOG2966@2759|Eukaryota,38G3W@33154|Opisthokonta,3BBZK@33208|Metazoa,3CW3P@33213|Bilateria,48AS0@7711|Chordata,492PF@7742|Vertebrata,4GIVC@8782|Aves	33208|Metazoa	S	Mitochondrial calcium uniporter dominant negative beta subunit	CCDC109B	GO:0003674,GO:0005246,GO:0005575,GO:0005622,GO:0005623,GO:0005737,GO:0005739,GO:0005740,GO:0005743,GO:0006810,GO:0006811,GO:0006812,GO:0006816,GO:0006839,GO:0006851,GO:0006873,GO:0006874,GO:0006875,GO:0008150,GO:0008200,GO:0009987,GO:0016020,GO:0016021,GO:0016247,GO:0016248,GO:0019725,GO:0019855,GO:0019866,GO:0030001,GO:0030003,GO:0031090,GO:0031224,GO:0031300,GO:0031301,GO:0031304,GO:0031305,GO:…	-	ko:K20858	ko04020,ko04218,ko04621,map04020,map04218,map04621	-	-	-	ko00000,ko00001,ko02000	1.A.77.1	-	-	MCU
LEUER_T0000322	LOC116972096	52644.XP_010559359.1	2.21e-85	267.0	KOG2966@1|root,KOG2966@2759|Eukaryota,38G3W@33154|Opisthokonta,3BBZK@33208|Metazoa,3CW3P@33213|Bilateria,48AS0@7711|Chordata,492PF@7742|Vertebrata,4GIVC@8782|Aves	33208|Metazoa	S	Mitochondrial calcium uniporter dominant negative beta subunit	CCDC109B	GO:0003674,GO:0005246,GO:0005575,GO:0005622,GO:0005623,GO:0005737,GO:0005739,GO:0005740,GO:0005743,GO:0006810,GO:0006811,GO:0006812,GO:0006816,GO:0006839,GO:0006851,GO:0006873,GO:0006874,GO:0006875,GO:0008150,GO:0008200,GO:0009987,GO:0016020,GO:0016021,GO:0016247,GO:0016248,GO:0019725,GO:0019855,GO:0019866,GO:0030001,GO:0030003,GO:0031090,GO:0031224,GO:0031300,GO:0031301,GO:0031304,GO:0031305,GO:…	-	ko:K20858	ko04020,ko04218,ko04621,map04020,map04218,map04621	-	-	-	ko00000,ko00001,ko02000	1.A.77.1	-	-	MCU
LEUER_T0000323	LOC116983367	52644.XP_010559359.1	2.33e-61	202.0	KOG2966@1|root,KOG2966@2759|Eukaryota,38G3W@33154|Opisthokonta,3BBZK@33208|Metazoa,3CW3P@33213|Bilateria,48AS0@7711|Chordata,492PF@7742|Vertebrata,4GIVC@8782|Aves	33208|Metazoa	S	Mitochondrial calcium uniporter dominant negative beta subunit	CCDC109B	GO:0003674,GO:0005246,GO:0005575,GO:0005622,GO:0005623,GO:0005737,GO:0005739,GO:0005740,GO:0005743,GO:0006810,GO:0006811,GO:0006812,GO:0006816,GO:0006839,GO:0006851,GO:0006873,GO:0006874,GO:0006875,GO:0008150,GO:0008200,GO:0009987,GO:0016020,GO:0016021,GO:0016247,GO:0016248,GO:0019725,GO:0019855,GO:0019866,GO:0030001,GO:0030003,GO:0031090,GO:0031224,GO:0031300,GO:0031301,GO:0031304,GO:0031305,GO:…	-	ko:K20858	ko04020,ko04218,ko04621,map04020,map04218,map04621	-	-	-	ko00000,ko00001,ko02000	1.A.77.1	-	-	MCU
LEUER_T0000325	zbtb49	7918.ENSLOCP00000012193	7.4e-95	320.0	KOG1721@1|root,KOG1721@2759|Eukaryota,3931M@33154|Opisthokonta,3BHWE@33208|Metazoa,3CVTU@33213|Bilateria,483N1@7711|Chordata,493MT@7742|Vertebrata,4A0A0@7898|Actinopterygii	33208|Metazoa	K	Zinc finger and BTB	ZBTB49	GO:0000981,GO:0001221,GO:0001223,GO:0003674,GO:0003676,GO:0003677,GO:0003700,GO:0005488,GO:0005515,GO:0005575,GO:0005622,GO:0005623,GO:0005634,GO:0005654,GO:0005737,GO:0005829,GO:0005856,GO:0006355,GO:0006357,GO:0007049,GO:0007050,GO:0008134,GO:0008150,GO:0008285,GO:0009889,GO:0009891,GO:0009893,GO:0009987,GO:0010468,GO:0010556,GO:0010557,GO:0010604,GO:0010628,GO:0015630,GO:0019219,GO:0019222,GO:…	-	-	-	-	-	-	-	-	-	-	BTB,zf-C2H2
LEUER_T0000327	zbtb49	7918.ENSLOCP00000012193	3.09e-45	181.0	KOG1721@1|root,KOG1721@2759|Eukaryota,3931M@33154|Opisthokonta,3BHWE@33208|Metazoa,3CVTU@33213|Bilateria,483N1@7711|Chordata,493MT@7742|Vertebrata,4A0A0@7898|Actinopterygii	33208|Metazoa	K	Zinc finger and BTB	ZBTB49	GO:0000981,GO:0001221,GO:0001223,GO:0003674,GO:0003676,GO:0003677,GO:0003700,GO:0005488,GO:0005515,GO:0005575,GO:0005622,GO:0005623,GO:0005634,GO:0005654,GO:0005737,GO:0005829,GO:0005856,GO:0006355,GO:0006357,GO:0007049,GO:0007050,GO:0008134,GO:0008150,GO:0008285,GO:0009889,GO:0009891,GO:0009893,GO:0009987,GO:0010468,GO:0010556,GO:0010557,GO:0010604,GO:0010628,GO:0015630,GO:0019219,GO:0019222,GO:…	-	-	-	-	-	-	-	-	-	-	BTB,zf-C2H2
LEUER_T0000324	zbtb49	7918.ENSLOCP00000012193	7.4e-95	320.0	KOG1721@1|root,KOG1721@2759|Eukaryota,3931M@33154|Opisthokonta,3BHWE@33208|Metazoa,3CVTU@33213|Bilateria,483N1@7711|Chordata,493MT@7742|Vertebrata,4A0A0@7898|Actinopterygii	33208|Metazoa	K	Zinc finger and BTB	ZBTB49	GO:0000981,GO:0001221,GO:0001223,GO:0003674,GO:0003676,GO:0003677,GO:0003700,GO:0005488,GO:0005515,GO:0005575,GO:0005622,GO:0005623,GO:0005634,GO:0005654,GO:0005737,GO:0005829,GO:0005856,GO:0006355,GO:0006357,GO:0007049,GO:0007050,GO:0008134,GO:0008150,GO:0008285,GO:0009889,GO:0009891,GO:0009893,GO:0009987,GO:0010468,GO:0010556,GO:0010557,GO:0010604,GO:0010628,GO:0015630,GO:0019219,GO:0019222,GO:…	-	-	-	-	-	-	-	-	-	-	BTB,zf-C2H2
LEUER_T0000326	zbtb49	7918.ENSLOCP00000012193	7.4e-95	320.0	KOG1721@1|root,KOG1721@2759|Eukaryota,3931M@33154|Opisthokonta,3BHWE@33208|Metazoa,3CVTU@33213|Bilateria,483N1@7711|Chordata,493MT@7742|Vertebrata,4A0A0@7898|Actinopterygii	33208|Metazoa	K	Zinc finger and BTB	ZBTB49	GO:0000981,GO:0001221,GO:0001223,GO:0003674,GO:0003676,GO:0003677,GO:0003700,GO:0005488,GO:0005515,GO:0005575,GO:0005622,GO:0005623,GO:0005634,GO:0005654,GO:0005737,GO:0005829,GO:0005856,GO:0006355,GO:0006357,GO:0007049,GO:0007050,GO:0008134,GO:0008150,GO:0008285,GO:0009889,GO:0009891,GO:0009893,GO:0009987,GO:0010468,GO:0010556,GO:0010557,GO:0010604,GO:0010628,GO:0015630,GO:0019219,GO:0019222,GO:…	-	-	-	-	-	-	-	-	-	-	BTB,zf-C2H2
LEUER_T0000328	lyar	7918.ENSLOCP00000012182	1.81e-72	235.0	KOG2186@1|root,KOG2186@2759|Eukaryota,39RUM@33154|Opisthokonta,3BEGD@33208|Metazoa,3D0IY@33213|Bilateria,4839P@7711|Chordata,498NF@7742|Vertebrata,49Q5R@7898|Actinopterygii	33208|Metazoa	D	Ly1 antibody reactive	LYAR	GO:0000122,GO:0001750,GO:0002262,GO:0002376,GO:0002520,GO:0003674,GO:0003676,GO:0003677,GO:0005488,GO:0005575,GO:0005622,GO:0005623,GO:0005634,GO:0005730,GO:0005929,GO:0006139,GO:0006355,GO:0006357,GO:0006364,GO:0006396,GO:0006725,GO:0006807,GO:0007275,GO:0008150,GO:0008152,GO:0009889,GO:0009890,GO:0009892,GO:0009987,GO:0010467,GO:0010468,GO:0010556,GO:0010558,GO:0010605,GO:0010629,GO:0016070,GO:…	-	ko:K15263	-	-	-	-	ko00000,ko03009	-	-	-	zf-LYAR
LEUER_T0000330	tmem128	8479.XP_005300307.1	5.5e-58	185.0	2AHA3@1|root,2RZ1U@2759|Eukaryota,39XJH@33154|Opisthokonta,3BNVJ@33208|Metazoa,3CTUT@33213|Bilateria,4838U@7711|Chordata,4947V@7742|Vertebrata,4CHM2@8459|Testudines	33208|Metazoa	-	-	TMEM128	-	-	-	-	-	-	-	-	-	-	-	-
LEUER_T0000329	tmem128	8479.XP_005300307.1	5.5e-58	185.0	2AHA3@1|root,2RZ1U@2759|Eukaryota,39XJH@33154|Opisthokonta,3BNVJ@33208|Metazoa,3CTUT@33213|Bilateria,4838U@7711|Chordata,4947V@7742|Vertebrata,4CHM2@8459|Testudines	33208|Metazoa	-	-	TMEM128	-	-	-	-	-	-	-	-	-	-	-	-
LEUER_T0000331	otop1	8469.XP_007063012.1	1.56e-201	583.0	KOG4740@1|root,KOG4740@2759|Eukaryota,39I46@33154|Opisthokonta,3BGTM@33208|Metazoa,3CV82@33213|Bilateria,483GU@7711|Chordata,48ZKS@7742|Vertebrata,4C73M@8459|Testudines	33208|Metazoa	S	Otopetrin	OTOP1	GO:0001959,GO:0001960,GO:0002682,GO:0002683,GO:0003674,GO:0005215,GO:0005216,GO:0005261,GO:0005575,GO:0005623,GO:0005886,GO:0005887,GO:0006810,GO:0006811,GO:0006812,GO:0007275,GO:0007423,GO:0008150,GO:0008324,GO:0009581,GO:0009582,GO:0009590,GO:0009605,GO:0009628,GO:0009629,GO:0009653,GO:0009719,GO:0009725,GO:0009790,GO:0009887,GO:0009966,GO:0009968,GO:0009987,GO:0010033,GO:0010243,GO:0010646,GO:…	-	-	-	-	-	-	-	-	-	-	Otopetrin
LEUER_T0000334	LOC116972084	38654.XP_006031316.1	0.0	1329.0	COG5028@1|root,KOG1985@2759|Eukaryota,3AGJX@33154|Opisthokonta,3BG52@33208|Metazoa,3CS67@33213|Bilateria,483S5@7711|Chordata,48VR8@7742|Vertebrata	33208|Metazoa	U	cargo loading into COPII-coated vesicle	SEC24B	GO:0002376,GO:0002474,GO:0002478,GO:0002495,GO:0002504,GO:0003674,GO:0005048,GO:0005215,GO:0005488,GO:0005575,GO:0005622,GO:0005623,GO:0005737,GO:0005783,GO:0005789,GO:0005798,GO:0005829,GO:0006810,GO:0006888,GO:0006900,GO:0006901,GO:0006903,GO:0006996,GO:0008150,GO:0008270,GO:0009987,GO:0012505,GO:0012506,GO:0012507,GO:0016020,GO:0016043,GO:0016050,GO:0016192,GO:0019882,GO:0019884,GO:0019886,GO:…	-	ko:K14007	ko04141,map04141	M00404	-	-	ko00000,ko00001,ko00002,ko04131	-	-	-	Gelsolin,Sec23_BS,Sec23_helical,Sec23_trunk,zf-Sec23_Sec24
LEUER_T0000335	LOC116972084	38654.XP_006031316.1	0.0	1308.0	COG5028@1|root,KOG1985@2759|Eukaryota,3AGJX@33154|Opisthokonta,3BG52@33208|Metazoa,3CS67@33213|Bilateria,483S5@7711|Chordata,48VR8@7742|Vertebrata	33208|Metazoa	U	cargo loading into COPII-coated vesicle	SEC24B	GO:0002376,GO:0002474,GO:0002478,GO:0002495,GO:0002504,GO:0003674,GO:0005048,GO:0005215,GO:0005488,GO:0005575,GO:0005622,GO:0005623,GO:0005737,GO:0005783,GO:0005789,GO:0005798,GO:0005829,GO:0006810,GO:0006888,GO:0006900,GO:0006901,GO:0006903,GO:0006996,GO:0008150,GO:0008270,GO:0009987,GO:0012505,GO:0012506,GO:0012507,GO:0016020,GO:0016043,GO:0016050,GO:0016192,GO:0019882,GO:0019884,GO:0019886,GO:…	-	ko:K14007	ko04141,map04141	M00404	-	-	ko00000,ko00001,ko00002,ko04131	-	-	-	Gelsolin,Sec23_BS,Sec23_helical,Sec23_trunk,zf-Sec23_Sec24
LEUER_T0000336	LOC116972084	38654.XP_006031316.1	0.0	1266.0	COG5028@1|root,KOG1985@2759|Eukaryota,3AGJX@33154|Opisthokonta,3BG52@33208|Metazoa,3CS67@33213|Bilateria,483S5@7711|Chordata,48VR8@7742|Vertebrata	33208|Metazoa	U	cargo loading into COPII-coated vesicle	SEC24B	GO:0002376,GO:0002474,GO:0002478,GO:0002495,GO:0002504,GO:0003674,GO:0005048,GO:0005215,GO:0005488,GO:0005575,GO:0005622,GO:0005623,GO:0005737,GO:0005783,GO:0005789,GO:0005798,GO:0005829,GO:0006810,GO:0006888,GO:0006900,GO:0006901,GO:0006903,GO:0006996,GO:0008150,GO:0008270,GO:0009987,GO:0012505,GO:0012506,GO:0012507,GO:0016020,GO:0016043,GO:0016050,GO:0016192,GO:0019882,GO:0019884,GO:0019886,GO:…	-	ko:K14007	ko04141,map04141	M00404	-	-	ko00000,ko00001,ko00002,ko04131	-	-	-	Gelsolin,Sec23_BS,Sec23_helical,Sec23_trunk,zf-Sec23_Sec24
LEUER_T0000337	LOC116972107	8010.XP_010886701.1	6.12e-136	393.0	KOG3573@1|root,KOG3573@2759|Eukaryota,38FU2@33154|Opisthokonta,3BAFU@33208|Metazoa,3CTYR@33213|Bilateria,483T3@7711|Chordata,4914W@7742|Vertebrata,49X79@7898|Actinopterygii	33208|Metazoa	D	Caspase 6, apoptosis-related cysteine peptidase	CASP6	GO:0000302,GO:0001654,GO:0002088,GO:0002525,GO:0002526,GO:0003674,GO:0003824,GO:0004175,GO:0004197,GO:0005488,GO:0005515,GO:0005575,GO:0005622,GO:0005623,GO:0005634,GO:0005654,GO:0005737,GO:0005829,GO:0006508,GO:0006807,GO:0006915,GO:0006950,GO:0006952,GO:0006954,GO:0006979,GO:0007275,GO:0007423,GO:0008150,GO:0008152,GO:0008219,GO:0008233,GO:0008234,GO:0009266,GO:0009314,GO:0009408,GO:0009628,GO:…	3.4.22.59,3.4.22.60	ko:K04396,ko:K04397	ko04210,ko04214,ko04215,ko04668,ko04932,ko05010,ko05133,ko05134,ko05200,map04210,map04214,map04215,map04668,map04932,map05010,map05133,map05134,map05200	M00685	-	-	ko00000,ko00001,ko00002,ko01000,ko01002	-	-	-	Peptidase_C14
LEUER_T0000338	LOC116972050	8010.XP_010886701.1	6.12e-136	393.0	KOG3573@1|root,KOG3573@2759|Eukaryota,38FU2@33154|Opisthokonta,3BAFU@33208|Metazoa,3CTYR@33213|Bilateria,483T3@7711|Chordata,4914W@7742|Vertebrata,49X79@7898|Actinopterygii	33208|Metazoa	D	Caspase 6, apoptosis-related cysteine peptidase	CASP6	GO:0000302,GO:0001654,GO:0002088,GO:0002525,GO:0002526,GO:0003674,GO:0003824,GO:0004175,GO:0004197,GO:0005488,GO:0005515,GO:0005575,GO:0005622,GO:0005623,GO:0005634,GO:0005654,GO:0005737,GO:0005829,GO:0006508,GO:0006807,GO:0006915,GO:0006950,GO:0006952,GO:0006954,GO:0006979,GO:0007275,GO:0007423,GO:0008150,GO:0008152,GO:0008219,GO:0008233,GO:0008234,GO:0009266,GO:0009314,GO:0009408,GO:0009628,GO:…	3.4.22.59,3.4.22.60	ko:K04396,ko:K04397	ko04210,ko04214,ko04215,ko04668,ko04932,ko05010,ko05133,ko05134,ko05200,map04210,map04214,map04215,map04668,map04932,map05010,map05133,map05134,map05200	M00685	-	-	ko00000,ko00001,ko00002,ko01000,ko01002	-	-	-	Peptidase_C14
LEUER_T0000339	LOC116972107	8010.XP_010886701.1	4.66e-136	393.0	KOG3573@1|root,KOG3573@2759|Eukaryota,38FU2@33154|Opisthokonta,3BAFU@33208|Metazoa,3CTYR@33213|Bilateria,483T3@7711|Chordata,4914W@7742|Vertebrata,49X79@7898|Actinopterygii	33208|Metazoa	D	Caspase 6, apoptosis-related cysteine peptidase	CASP6	GO:0000302,GO:0001654,GO:0002088,GO:0002525,GO:0002526,GO:0003674,GO:0003824,GO:0004175,GO:0004197,GO:0005488,GO:0005515,GO:0005575,GO:0005622,GO:0005623,GO:0005634,GO:0005654,GO:0005737,GO:0005829,GO:0006508,GO:0006807,GO:0006915,GO:0006950,GO:0006952,GO:0006954,GO:0006979,GO:0007275,GO:0007423,GO:0008150,GO:0008152,GO:0008219,GO:0008233,GO:0008234,GO:0009266,GO:0009314,GO:0009408,GO:0009628,GO:…	3.4.22.59,3.4.22.60	ko:K04396,ko:K04397	ko04210,ko04214,ko04215,ko04668,ko04932,ko05010,ko05133,ko05134,ko05200,map04210,map04214,map04215,map04668,map04932,map05010,map05133,map05134,map05200	M00685	-	-	ko00000,ko00001,ko00002,ko01000,ko01002	-	-	-	Peptidase_C14
LEUER_T0000358	cfi	7897.ENSLACP00000023323	2.03e-183	538.0	COG5640@1|root,KOG3627@2759|Eukaryota,38HQP@33154|Opisthokonta,3B93Q@33208|Metazoa,3D208@33213|Bilateria,4831P@7711|Chordata,494UV@7742|Vertebrata	33208|Metazoa	O	complement activation, classical pathway	CFI	GO:0002673,GO:0002682,GO:0002697,GO:0002920,GO:0003674,GO:0003824,GO:0004175,GO:0004252,GO:0005575,GO:0005576,GO:0005615,GO:0005622,GO:0005623,GO:0005634,GO:0006508,GO:0006807,GO:0008150,GO:0008152,GO:0008233,GO:0008236,GO:0009987,GO:0010033,GO:0010468,GO:0016787,GO:0017171,GO:0019222,GO:0019538,GO:0030162,GO:0030449,GO:0031347,GO:0032101,GO:0034097,GO:0042221,GO:0043170,GO:0043226,GO:0043227,GO:…	3.4.21.45	ko:K01333	ko04610,ko05150,map04610,map05150	-	-	-	ko00000,ko00001,ko01000,ko01002,ko04147	-	-	-	Kazal_2,Ldl_recept_a,SRCR,Trypsin
LEUER_T0000354	cfi	7897.ENSLACP00000023323	2.33e-183	538.0	COG5640@1|root,KOG3627@2759|Eukaryota,38HQP@33154|Opisthokonta,3B93Q@33208|Metazoa,3D208@33213|Bilateria,4831P@7711|Chordata,494UV@7742|Vertebrata	33208|Metazoa	O	complement activation, classical pathway	CFI	GO:0002673,GO:0002682,GO:0002697,GO:0002920,GO:0003674,GO:0003824,GO:0004175,GO:0004252,GO:0005575,GO:0005576,GO:0005615,GO:0005622,GO:0005623,GO:0005634,GO:0006508,GO:0006807,GO:0008150,GO:0008152,GO:0008233,GO:0008236,GO:0009987,GO:0010033,GO:0010468,GO:0016787,GO:0017171,GO:0019222,GO:0019538,GO:0030162,GO:0030449,GO:0031347,GO:0032101,GO:0034097,GO:0042221,GO:0043170,GO:0043226,GO:0043227,GO:…	3.4.21.45	ko:K01333	ko04610,ko05150,map04610,map05150	-	-	-	ko00000,ko00001,ko01000,ko01002,ko04147	-	-	-	Kazal_2,Ldl_recept_a,SRCR,Trypsin
LEUER_T0000350	cfi	7897.ENSLACP00000023323	3.53e-183	538.0	COG5640@1|root,KOG3627@2759|Eukaryota,38HQP@33154|Opisthokonta,3B93Q@33208|Metazoa,3D208@33213|Bilateria,4831P@7711|Chordata,494UV@7742|Vertebrata	33208|Metazoa	O	complement activation, classical pathway	CFI	GO:0002673,GO:0002682,GO:0002697,GO:0002920,GO:0003674,GO:0003824,GO:0004175,GO:0004252,GO:0005575,GO:0005576,GO:0005615,GO:0005622,GO:0005623,GO:0005634,GO:0006508,GO:0006807,GO:0008150,GO:0008152,GO:0008233,GO:0008236,GO:0009987,GO:0010033,GO:0010468,GO:0016787,GO:0017171,GO:0019222,GO:0019538,GO:0030162,GO:0030449,GO:0031347,GO:0032101,GO:0034097,GO:0042221,GO:0043170,GO:0043226,GO:0043227,GO:…	3.4.21.45	ko:K01333	ko04610,ko05150,map04610,map05150	-	-	-	ko00000,ko00001,ko01000,ko01002,ko04147	-	-	-	Kazal_2,Ldl_recept_a,SRCR,Trypsin
LEUER_T0000351	cfi	7897.ENSLACP00000023323	3.53e-183	538.0	COG5640@1|root,KOG3627@2759|Eukaryota,38HQP@33154|Opisthokonta,3B93Q@33208|Metazoa,3D208@33213|Bilateria,4831P@7711|Chordata,494UV@7742|Vertebrata	33208|Metazoa	O	complement activation, classical pathway	CFI	GO:0002673,GO:0002682,GO:0002697,GO:0002920,GO:0003674,GO:0003824,GO:0004175,GO:0004252,GO:0005575,GO:0005576,GO:0005615,GO:0005622,GO:0005623,GO:0005634,GO:0006508,GO:0006807,GO:0008150,GO:0008152,GO:0008233,GO:0008236,GO:0009987,GO:0010033,GO:0010468,GO:0016787,GO:0017171,GO:0019222,GO:0019538,GO:0030162,GO:0030449,GO:0031347,GO:0032101,GO:0034097,GO:0042221,GO:0043170,GO:0043226,GO:0043227,GO:…	3.4.21.45	ko:K01333	ko04610,ko05150,map04610,map05150	-	-	-	ko00000,ko00001,ko01000,ko01002,ko04147	-	-	-	Kazal_2,Ldl_recept_a,SRCR,Trypsin
LEUER_T0000355	cfi	7897.ENSLACP00000023323	2.33e-183	538.0	COG5640@1|root,KOG3627@2759|Eukaryota,38HQP@33154|Opisthokonta,3B93Q@33208|Metazoa,3D208@33213|Bilateria,4831P@7711|Chordata,494UV@7742|Vertebrata	33208|Metazoa	O	complement activation, classical pathway	CFI	GO:0002673,GO:0002682,GO:0002697,GO:0002920,GO:0003674,GO:0003824,GO:0004175,GO:0004252,GO:0005575,GO:0005576,GO:0005615,GO:0005622,GO:0005623,GO:0005634,GO:0006508,GO:0006807,GO:0008150,GO:0008152,GO:0008233,GO:0008236,GO:0009987,GO:0010033,GO:0010468,GO:0016787,GO:0017171,GO:0019222,GO:0019538,GO:0030162,GO:0030449,GO:0031347,GO:0032101,GO:0034097,GO:0042221,GO:0043170,GO:0043226,GO:0043227,GO:…	3.4.21.45	ko:K01333	ko04610,ko05150,map04610,map05150	-	-	-	ko00000,ko00001,ko01000,ko01002,ko04147	-	-	-	Kazal_2,Ldl_recept_a,SRCR,Trypsin
LEUER_T0000341	cfi	7897.ENSLACP00000023323	3.51e-180	531.0	COG5640@1|root,KOG3627@2759|Eukaryota,38HQP@33154|Opisthokonta,3B93Q@33208|Metazoa,3D208@33213|Bilateria,4831P@7711|Chordata,494UV@7742|Vertebrata	33208|Metazoa	O	complement activation, classical pathway	CFI	GO:0002673,GO:0002682,GO:0002697,GO:0002920,GO:0003674,GO:0003824,GO:0004175,GO:0004252,GO:0005575,GO:0005576,GO:0005615,GO:0005622,GO:0005623,GO:0005634,GO:0006508,GO:0006807,GO:0008150,GO:0008152,GO:0008233,GO:0008236,GO:0009987,GO:0010033,GO:0010468,GO:0016787,GO:0017171,GO:0019222,GO:0019538,GO:0030162,GO:0030449,GO:0031347,GO:0032101,GO:0034097,GO:0042221,GO:0043170,GO:0043226,GO:0043227,GO:…	3.4.21.45	ko:K01333	ko04610,ko05150,map04610,map05150	-	-	-	ko00000,ko00001,ko01000,ko01002,ko04147	-	-	-	Kazal_2,Ldl_recept_a,SRCR,Trypsin
LEUER_T0000342	cfi	7897.ENSLACP00000023323	6.1e-183	538.0	COG5640@1|root,KOG3627@2759|Eukaryota,38HQP@33154|Opisthokonta,3B93Q@33208|Metazoa,3D208@33213|Bilateria,4831P@7711|Chordata,494UV@7742|Vertebrata	33208|Metazoa	O	complement activation, classical pathway	CFI	GO:0002673,GO:0002682,GO:0002697,GO:0002920,GO:0003674,GO:0003824,GO:0004175,GO:0004252,GO:0005575,GO:0005576,GO:0005615,GO:0005622,GO:0005623,GO:0005634,GO:0006508,GO:0006807,GO:0008150,GO:0008152,GO:0008233,GO:0008236,GO:0009987,GO:0010033,GO:0010468,GO:0016787,GO:0017171,GO:0019222,GO:0019538,GO:0030162,GO:0030449,GO:0031347,GO:0032101,GO:0034097,GO:0042221,GO:0043170,GO:0043226,GO:0043227,GO:…	3.4.21.45	ko:K01333	ko04610,ko05150,map04610,map05150	-	-	-	ko00000,ko00001,ko01000,ko01002,ko04147	-	-	-	Kazal_2,Ldl_recept_a,SRCR,Trypsin
LEUER_T0000344	cfi	7897.ENSLACP00000023323	5.32e-183	538.0	COG5640@1|root,KOG3627@2759|Eukaryota,38HQP@33154|Opisthokonta,3B93Q@33208|Metazoa,3D208@33213|Bilateria,4831P@7711|Chordata,494UV@7742|Vertebrata	33208|Metazoa	O	complement activation, classical pathway	CFI	GO:0002673,GO:0002682,GO:0002697,GO:0002920,GO:0003674,GO:0003824,GO:0004175,GO:0004252,GO:0005575,GO:0005576,GO:0005615,GO:0005622,GO:0005623,GO:0005634,GO:0006508,GO:0006807,GO:0008150,GO:0008152,GO:0008233,GO:0008236,GO:0009987,GO:0010033,GO:0010468,GO:0016787,GO:0017171,GO:0019222,GO:0019538,GO:0030162,GO:0030449,GO:0031347,GO:0032101,GO:0034097,GO:0042221,GO:0043170,GO:0043226,GO:0043227,GO:…	3.4.21.45	ko:K01333	ko04610,ko05150,map04610,map05150	-	-	-	ko00000,ko00001,ko01000,ko01002,ko04147	-	-	-	Kazal_2,Ldl_recept_a,SRCR,Trypsin
LEUER_T0000349	cfi	7897.ENSLACP00000023323	3.53e-183	538.0	COG5640@1|root,KOG3627@2759|Eukaryota,38HQP@33154|Opisthokonta,3B93Q@33208|Metazoa,3D208@33213|Bilateria,4831P@7711|Chordata,494UV@7742|Vertebrata	33208|Metazoa	O	complement activation, classical pathway	CFI	GO:0002673,GO:0002682,GO:0002697,GO:0002920,GO:0003674,GO:0003824,GO:0004175,GO:0004252,GO:0005575,GO:0005576,GO:0005615,GO:0005622,GO:0005623,GO:0005634,GO:0006508,GO:0006807,GO:0008150,GO:0008152,GO:0008233,GO:0008236,GO:0009987,GO:0010033,GO:0010468,GO:0016787,GO:0017171,GO:0019222,GO:0019538,GO:0030162,GO:0030449,GO:0031347,GO:0032101,GO:0034097,GO:0042221,GO:0043170,GO:0043226,GO:0043227,GO:…	3.4.21.45	ko:K01333	ko04610,ko05150,map04610,map05150	-	-	-	ko00000,ko00001,ko01000,ko01002,ko04147	-	-	-	Kazal_2,Ldl_recept_a,SRCR,Trypsin
LEUER_T0000352	cfi	7897.ENSLACP00000023323	3.07e-183	538.0	COG5640@1|root,KOG3627@2759|Eukaryota,38HQP@33154|Opisthokonta,3B93Q@33208|Metazoa,3D208@33213|Bilateria,4831P@7711|Chordata,494UV@7742|Vertebrata	33208|Metazoa	O	complement activation, classical pathway	CFI	GO:0002673,GO:0002682,GO:0002697,GO:0002920,GO:0003674,GO:0003824,GO:0004175,GO:0004252,GO:0005575,GO:0005576,GO:0005615,GO:0005622,GO:0005623,GO:0005634,GO:0006508,GO:0006807,GO:0008150,GO:0008152,GO:0008233,GO:0008236,GO:0009987,GO:0010033,GO:0010468,GO:0016787,GO:0017171,GO:0019222,GO:0019538,GO:0030162,GO:0030449,GO:0031347,GO:0032101,GO:0034097,GO:0042221,GO:0043170,GO:0043226,GO:0043227,GO:…	3.4.21.45	ko:K01333	ko04610,ko05150,map04610,map05150	-	-	-	ko00000,ko00001,ko01000,ko01002,ko04147	-	-	-	Kazal_2,Ldl_recept_a,SRCR,Trypsin
LEUER_T0000353	cfi	7897.ENSLACP00000023323	2.68e-183	538.0	COG5640@1|root,KOG3627@2759|Eukaryota,38HQP@33154|Opisthokonta,3B93Q@33208|Metazoa,3D208@33213|Bilateria,4831P@7711|Chordata,494UV@7742|Vertebrata	33208|Metazoa	O	complement activation, classical pathway	CFI	GO:0002673,GO:0002682,GO:0002697,GO:0002920,GO:0003674,GO:0003824,GO:0004175,GO:0004252,GO:0005575,GO:0005576,GO:0005615,GO:0005622,GO:0005623,GO:0005634,GO:0006508,GO:0006807,GO:0008150,GO:0008152,GO:0008233,GO:0008236,GO:0009987,GO:0010033,GO:0010468,GO:0016787,GO:0017171,GO:0019222,GO:0019538,GO:0030162,GO:0030449,GO:0031347,GO:0032101,GO:0034097,GO:0042221,GO:0043170,GO:0043226,GO:0043227,GO:…	3.4.21.45	ko:K01333	ko04610,ko05150,map04610,map05150	-	-	-	ko00000,ko00001,ko01000,ko01002,ko04147	-	-	-	Kazal_2,Ldl_recept_a,SRCR,Trypsin
LEUER_T0000356	cfi	7897.ENSLACP00000023323	2.03e-183	538.0	COG5640@1|root,KOG3627@2759|Eukaryota,38HQP@33154|Opisthokonta,3B93Q@33208|Metazoa,3D208@33213|Bilateria,4831P@7711|Chordata,494UV@7742|Vertebrata	33208|Metazoa	O	complement activation, classical pathway	CFI	GO:0002673,GO:0002682,GO:0002697,GO:0002920,GO:0003674,GO:0003824,GO:0004175,GO:0004252,GO:0005575,GO:0005576,GO:0005615,GO:0005622,GO:0005623,GO:0005634,GO:0006508,GO:0006807,GO:0008150,GO:0008152,GO:0008233,GO:0008236,GO:0009987,GO:0010033,GO:0010468,GO:0016787,GO:0017171,GO:0019222,GO:0019538,GO:0030162,GO:0030449,GO:0031347,GO:0032101,GO:0034097,GO:0042221,GO:0043170,GO:0043226,GO:0043227,GO:…	3.4.21.45	ko:K01333	ko04610,ko05150,map04610,map05150	-	-	-	ko00000,ko00001,ko01000,ko01002,ko04147	-	-	-	Kazal_2,Ldl_recept_a,SRCR,Trypsin
LEUER_T0000357	cfi	7897.ENSLACP00000023323	2.03e-183	538.0	COG5640@1|root,KOG3627@2759|Eukaryota,38HQP@33154|Opisthokonta,3B93Q@33208|Metazoa,3D208@33213|Bilateria,4831P@7711|Chordata,494UV@7742|Vertebrata	33208|Metazoa	O	complement activation, classical pathway	CFI	GO:0002673,GO:0002682,GO:0002697,GO:0002920,GO:0003674,GO:0003824,GO:0004175,GO:0004252,GO:0005575,GO:0005576,GO:0005615,GO:0005622,GO:0005623,GO:0005634,GO:0006508,GO:0006807,GO:0008150,GO:0008152,GO:0008233,GO:0008236,GO:0009987,GO:0010033,GO:0010468,GO:0016787,GO:0017171,GO:0019222,GO:0019538,GO:0030162,GO:0030449,GO:0031347,GO:0032101,GO:0034097,GO:0042221,GO:0043170,GO:0043226,GO:0043227,GO:…	3.4.21.45	ko:K01333	ko04610,ko05150,map04610,map05150	-	-	-	ko00000,ko00001,ko01000,ko01002,ko04147	-	-	-	Kazal_2,Ldl_recept_a,SRCR,Trypsin
LEUER_T0000340	cfi	7897.ENSLACP00000023323	7e-183	538.0	COG5640@1|root,KOG3627@2759|Eukaryota,38HQP@33154|Opisthokonta,3B93Q@33208|Metazoa,3D208@33213|Bilateria,4831P@7711|Chordata,494UV@7742|Vertebrata	33208|Metazoa	O	complement activation, classical pathway	CFI	GO:0002673,GO:0002682,GO:0002697,GO:0002920,GO:0003674,GO:0003824,GO:0004175,GO:0004252,GO:0005575,GO:0005576,GO:0005615,GO:0005622,GO:0005623,GO:0005634,GO:0006508,GO:0006807,GO:0008150,GO:0008152,GO:0008233,GO:0008236,GO:0009987,GO:0010033,GO:0010468,GO:0016787,GO:0017171,GO:0019222,GO:0019538,GO:0030162,GO:0030449,GO:0031347,GO:0032101,GO:0034097,GO:0042221,GO:0043170,GO:0043226,GO:0043227,GO:…	3.4.21.45	ko:K01333	ko04610,ko05150,map04610,map05150	-	-	-	ko00000,ko00001,ko01000,ko01002,ko04147	-	-	-	Kazal_2,Ldl_recept_a,SRCR,Trypsin
LEUER_T0000345	cfi	7897.ENSLACP00000023323	4.64e-183	538.0	COG5640@1|root,KOG3627@2759|Eukaryota,38HQP@33154|Opisthokonta,3B93Q@33208|Metazoa,3D208@33213|Bilateria,4831P@7711|Chordata,494UV@7742|Vertebrata	33208|Metazoa	O	complement activation, classical pathway	CFI	GO:0002673,GO:0002682,GO:0002697,GO:0002920,GO:0003674,GO:0003824,GO:0004175,GO:0004252,GO:0005575,GO:0005576,GO:0005615,GO:0005622,GO:0005623,GO:0005634,GO:0006508,GO:0006807,GO:0008150,GO:0008152,GO:0008233,GO:0008236,GO:0009987,GO:0010033,GO:0010468,GO:0016787,GO:0017171,GO:0019222,GO:0019538,GO:0030162,GO:0030449,GO:0031347,GO:0032101,GO:0034097,GO:0042221,GO:0043170,GO:0043226,GO:0043227,GO:…	3.4.21.45	ko:K01333	ko04610,ko05150,map04610,map05150	-	-	-	ko00000,ko00001,ko01000,ko01002,ko04147	-	-	-	Kazal_2,Ldl_recept_a,SRCR,Trypsin
LEUER_T0000346	cfi	7897.ENSLACP00000023323	4.05e-183	538.0	COG5640@1|root,KOG3627@2759|Eukaryota,38HQP@33154|Opisthokonta,3B93Q@33208|Metazoa,3D208@33213|Bilateria,4831P@7711|Chordata,494UV@7742|Vertebrata	33208|Metazoa	O	complement activation, classical pathway	CFI	GO:0002673,GO:0002682,GO:0002697,GO:0002920,GO:0003674,GO:0003824,GO:0004175,GO:0004252,GO:0005575,GO:0005576,GO:0005615,GO:0005622,GO:0005623,GO:0005634,GO:0006508,GO:0006807,GO:0008150,GO:0008152,GO:0008233,GO:0008236,GO:0009987,GO:0010033,GO:0010468,GO:0016787,GO:0017171,GO:0019222,GO:0019538,GO:0030162,GO:0030449,GO:0031347,GO:0032101,GO:0034097,GO:0042221,GO:0043170,GO:0043226,GO:0043227,GO:…	3.4.21.45	ko:K01333	ko04610,ko05150,map04610,map05150	-	-	-	ko00000,ko00001,ko01000,ko01002,ko04147	-	-	-	Kazal_2,Ldl_recept_a,SRCR,Trypsin
LEUER_T0000347	cfi	7897.ENSLACP00000023323	4.05e-183	538.0	COG5640@1|root,KOG3627@2759|Eukaryota,38HQP@33154|Opisthokonta,3B93Q@33208|Metazoa,3D208@33213|Bilateria,4831P@7711|Chordata,494UV@7742|Vertebrata	33208|Metazoa	O	complement activation, classical pathway	CFI	GO:0002673,GO:0002682,GO:0002697,GO:0002920,GO:0003674,GO:0003824,GO:0004175,GO:0004252,GO:0005575,GO:0005576,GO:0005615,GO:0005622,GO:0005623,GO:0005634,GO:0006508,GO:0006807,GO:0008150,GO:0008152,GO:0008233,GO:0008236,GO:0009987,GO:0010033,GO:0010468,GO:0016787,GO:0017171,GO:0019222,GO:0019538,GO:0030162,GO:0030449,GO:0031347,GO:0032101,GO:0034097,GO:0042221,GO:0043170,GO:0043226,GO:0043227,GO:…	3.4.21.45	ko:K01333	ko04610,ko05150,map04610,map05150	-	-	-	ko00000,ko00001,ko01000,ko01002,ko04147	-	-	-	Kazal_2,Ldl_recept_a,SRCR,Trypsin
LEUER_T0000348	cfi	7897.ENSLACP00000023323	3.53e-183	538.0	COG5640@1|root,KOG3627@2759|Eukaryota,38HQP@33154|Opisthokonta,3B93Q@33208|Metazoa,3D208@33213|Bilateria,4831P@7711|Chordata,494UV@7742|Vertebrata	33208|Metazoa	O	complement activation, classical pathway	CFI	GO:0002673,GO:0002682,GO:0002697,GO:0002920,GO:0003674,GO:0003824,GO:0004175,GO:0004252,GO:0005575,GO:0005576,GO:0005615,GO:0005622,GO:0005623,GO:0005634,GO:0006508,GO:0006807,GO:0008150,GO:0008152,GO:0008233,GO:0008236,GO:0009987,GO:0010033,GO:0010468,GO:0016787,GO:0017171,GO:0019222,GO:0019538,GO:0030162,GO:0030449,GO:0031347,GO:0032101,GO:0034097,GO:0042221,GO:0043170,GO:0043226,GO:0043227,GO:…	3.4.21.45	ko:K01333	ko04610,ko05150,map04610,map05150	-	-	-	ko00000,ko00001,ko01000,ko01002,ko04147	-	-	-	Kazal_2,Ldl_recept_a,SRCR,Trypsin
LEUER_T0000343	cfi	7897.ENSLACP00000023323	6.1e-183	538.0	COG5640@1|root,KOG3627@2759|Eukaryota,38HQP@33154|Opisthokonta,3B93Q@33208|Metazoa,3D208@33213|Bilateria,4831P@7711|Chordata,494UV@7742|Vertebrata	33208|Metazoa	O	complement activation, classical pathway	CFI	GO:0002673,GO:0002682,GO:0002697,GO:0002920,GO:0003674,GO:0003824,GO:0004175,GO:0004252,GO:0005575,GO:0005576,GO:0005615,GO:0005622,GO:0005623,GO:0005634,GO:0006508,GO:0006807,GO:0008150,GO:0008152,GO:0008233,GO:0008236,GO:0009987,GO:0010033,GO:0010468,GO:0016787,GO:0017171,GO:0019222,GO:0019538,GO:0030162,GO:0030449,GO:0031347,GO:0032101,GO:0034097,GO:0042221,GO:0043170,GO:0043226,GO:0043227,GO:…	3.4.21.45	ko:K01333	ko04610,ko05150,map04610,map05150	-	-	-	ko00000,ko00001,ko01000,ko01002,ko04147	-	-	-	Kazal_2,Ldl_recept_a,SRCR,Trypsin
LEUER_T0000359	lrat	28377.ENSACAP00000015329	1.81e-96	288.0	28Q3K@1|root,2QWSA@2759|Eukaryota,39SRW@33154|Opisthokonta,3BHTC@33208|Metazoa,3CVPD@33213|Bilateria,484VB@7711|Chordata,490YM@7742|Vertebrata	33208|Metazoa	S	lecithin:11-cis retinol acyltransferase activity	LRAT	GO:0001101,GO:0001523,GO:0001972,GO:0003674,GO:0003824,GO:0005488,GO:0005501,GO:0005575,GO:0005622,GO:0005623,GO:0005737,GO:0005768,GO:0005770,GO:0005771,GO:0005783,GO:0005789,GO:0005791,GO:0006066,GO:0006629,GO:0006644,GO:0006650,GO:0006653,GO:0006720,GO:0006721,GO:0006766,GO:0006775,GO:0006776,GO:0006793,GO:0006796,GO:0006807,GO:0007584,GO:0008150,GO:0008152,GO:0008289,GO:0008374,GO:0009605,GO:…	2.3.1.135	ko:K00678	ko00830,ko04977,map00830,map04977	-	R08387,R08389	RC00041	ko00000,ko00001,ko01000	-	-	-	LRAT
LEUER_T0000360	LOC116972209	8479.XP_005299417.1	0.0	915.0	2CMVQ@1|root,2QS8D@2759|Eukaryota,39R6T@33154|Opisthokonta,3BJYX@33208|Metazoa,3D0NH@33213|Bilateria,482M9@7711|Chordata,498R8@7742|Vertebrata,4CK4A@8459|Testudines	33208|Metazoa	S	Acyclic terpene utilisation family protein AtuA	-	-	-	-	-	-	-	-	-	-	-	-	AtuA
LEUER_T0000361	fgg	13616.ENSMODP00000001536	3.54e-144	425.0	KOG2579@1|root,KOG2579@2759|Eukaryota,38EPV@33154|Opisthokonta,3BGZA@33208|Metazoa,3CSJC@33213|Bilateria,4886M@7711|Chordata,48VJR@7742|Vertebrata,3JE82@40674|Mammalia,4JZ87@9263|Metatheria	33208|Metazoa	S	Fibrinogen gamma chain	FGG	GO:0001775,GO:0001932,GO:0001934,GO:0002218,GO:0002221,GO:0002224,GO:0002253,GO:0002376,GO:0002576,GO:0002682,GO:0002684,GO:0002757,GO:0002758,GO:0002764,GO:0002790,GO:0002791,GO:0002793,GO:0003008,GO:0003013,GO:0003018,GO:0003674,GO:0005102,GO:0005198,GO:0005488,GO:0005515,GO:0005575,GO:0005576,GO:0005577,GO:0005615,GO:0005622,GO:0005623,GO:0005737,GO:0005783,GO:0005788,GO:0005886,GO:0005938,GO:…	-	ko:K03903,ko:K03905	ko04610,ko04611,ko05150,map04610,map04611,map05150	-	-	-	ko00000,ko00001,ko00536,ko04147,ko04516	-	-	-	Fib_alpha,Fibrinogen_C
LEUER_T0000364	LOC116972258	13616.ENSMODP00000001507	6.1e-111	343.0	KOG2579@1|root,KOG2579@2759|Eukaryota,38EPV@33154|Opisthokonta,3BGZA@33208|Metazoa,3CSJC@33213|Bilateria,489RX@7711|Chordata,496AV@7742|Vertebrata,3JB6V@40674|Mammalia,4K05J@9263|Metatheria	33208|Metazoa	S	Fibrinogen alpha chain	FGA	GO:0001775,GO:0001889,GO:0001932,GO:0001934,GO:0002218,GO:0002221,GO:0002224,GO:0002253,GO:0002376,GO:0002526,GO:0002576,GO:0002682,GO:0002684,GO:0002757,GO:0002758,GO:0002764,GO:0002791,GO:0002793,GO:0003008,GO:0003013,GO:0003018,GO:0003674,GO:0005198,GO:0005488,GO:0005515,GO:0005575,GO:0005576,GO:0005577,GO:0005615,GO:0005622,GO:0005623,GO:0005737,GO:0005783,GO:0005788,GO:0005791,GO:0005886,GO:…	-	ko:K03903,ko:K03905	ko04610,ko04611,ko05150,map04610,map04611,map05150	-	-	-	ko00000,ko00001,ko00536,ko04147,ko04516	-	-	-	Fib_alpha,Fibrinogen_C,Fibrinogen_aC
LEUER_T0000365	fgb	7918.ENSLOCP00000010201	3.44e-192	552.0	KOG2579@1|root,KOG2579@2759|Eukaryota,38GIN@33154|Opisthokonta,3BD08@33208|Metazoa,3CS8P@33213|Bilateria,48278@7711|Chordata,492YG@7742|Vertebrata,49ZAU@7898|Actinopterygii	33208|Metazoa	S	Fibrinogen, B beta polypeptide	FGB	GO:0001775,GO:0001932,GO:0001934,GO:0002218,GO:0002221,GO:0002224,GO:0002253,GO:0002376,GO:0002576,GO:0002682,GO:0002684,GO:0002757,GO:0002758,GO:0002764,GO:0002791,GO:0002793,GO:0003008,GO:0003013,GO:0003018,GO:0003674,GO:0005198,GO:0005488,GO:0005515,GO:0005575,GO:0005576,GO:0005577,GO:0005615,GO:0005622,GO:0005623,GO:0005737,GO:0005783,GO:0005886,GO:0005938,GO:0006508,GO:0006807,GO:0006810,GO:…	-	ko:K03904	ko04610,ko04611,map04610,map04611	-	-	-	ko00000,ko00001,ko00536,ko04147,ko04516	-	-	-	Fib_alpha,Fibrinogen_C
LEUER_T0000366	fgb	181119.XP_005517627.1	3.7e-193	554.0	KOG2579@1|root,KOG2579@2759|Eukaryota,38GIN@33154|Opisthokonta,3BD08@33208|Metazoa,3CS8P@33213|Bilateria,48278@7711|Chordata,492YG@7742|Vertebrata,4GJG3@8782|Aves	33208|Metazoa	S	fibrinogen beta chain	FGB	GO:0001775,GO:0001932,GO:0001934,GO:0002218,GO:0002221,GO:0002224,GO:0002253,GO:0002376,GO:0002576,GO:0002682,GO:0002684,GO:0002757,GO:0002758,GO:0002764,GO:0002791,GO:0002793,GO:0003008,GO:0003013,GO:0003018,GO:0003674,GO:0005198,GO:0005488,GO:0005515,GO:0005575,GO:0005576,GO:0005577,GO:0005615,GO:0005622,GO:0005623,GO:0005737,GO:0005783,GO:0005886,GO:0005938,GO:0006508,GO:0006807,GO:0006810,GO:…	-	ko:K03904	ko04610,ko04611,map04610,map04611	-	-	-	ko00000,ko00001,ko00536,ko04147,ko04516	-	-	-	Fib_alpha,Fibrinogen_C
LEUER_T0000367	LOC116986291	59894.ENSFALP00000013701	1.21e-39	160.0	KOG2579@1|root,KOG2579@2759|Eukaryota,38EPV@33154|Opisthokonta,3BGZA@33208|Metazoa,3CSJC@33213|Bilateria,489RX@7711|Chordata,496AV@7742|Vertebrata,4GK97@8782|Aves	33208|Metazoa	S	Fibrinogen alpha chain	FGA	GO:0001775,GO:0001889,GO:0001932,GO:0001934,GO:0002218,GO:0002221,GO:0002224,GO:0002253,GO:0002376,GO:0002526,GO:0002576,GO:0002682,GO:0002684,GO:0002757,GO:0002758,GO:0002764,GO:0002791,GO:0002793,GO:0003008,GO:0003013,GO:0003018,GO:0003674,GO:0005198,GO:0005488,GO:0005515,GO:0005575,GO:0005576,GO:0005577,GO:0005615,GO:0005622,GO:0005623,GO:0005737,GO:0005783,GO:0005788,GO:0005791,GO:0005886,GO:…	-	ko:K03903,ko:K03905	ko04610,ko04611,ko05150,map04610,map04611,map05150	-	-	-	ko00000,ko00001,ko00536,ko04147,ko04516	-	-	-	Fib_alpha,Fibrinogen_C,Fibrinogen_aC
LEUER_T0000368	plrg1	7897.ENSLACP00000001033	7.25e-163	475.0	KOG0285@1|root,KOG0285@2759|Eukaryota,38DW7@33154|Opisthokonta,3BE61@33208|Metazoa,3CT2A@33213|Bilateria,48AQY@7711|Chordata,494MX@7742|Vertebrata	33208|Metazoa	A	Pleiotropic regulator 1	PLRG1	GO:0000151,GO:0000375,GO:0000377,GO:0000398,GO:0000974,GO:0001650,GO:0002790,GO:0005575,GO:0005622,GO:0005623,GO:0005634,GO:0005635,GO:0005654,GO:0005681,GO:0005684,GO:0005730,GO:0005737,GO:0005829,GO:0006139,GO:0006396,GO:0006397,GO:0006725,GO:0006807,GO:0006810,GO:0006996,GO:0007030,GO:0007346,GO:0008104,GO:0008150,GO:0008152,GO:0008380,GO:0009306,GO:0009987,GO:0010256,GO:0010467,GO:0010564,GO:…	-	ko:K12862	ko03040,map03040	M00353,M00355	-	-	ko00000,ko00001,ko00002,ko03041,ko03400	-	-	-	WD40
LEUER_T0000369	sfrp2	7897.ENSLACP00000007301	2.09e-148	424.0	KOG3577@1|root,KOG3577@2759|Eukaryota,38C9X@33154|Opisthokonta,3BDJ5@33208|Metazoa,3CZRW@33213|Bilateria,487P0@7711|Chordata,48VK3@7742|Vertebrata	33208|Metazoa	T	negative regulation of dermatome development	SFRP2	GO:0000003,GO:0001501,GO:0001525,GO:0001558,GO:0001568,GO:0001569,GO:0001756,GO:0001763,GO:0001838,GO:0001841,GO:0001843,GO:0001932,GO:0001933,GO:0001934,GO:0001944,GO:0001968,GO:0002009,GO:0002062,GO:0002063,GO:0002376,GO:0002520,GO:0003002,GO:0003006,GO:0003007,GO:0003151,GO:0003205,GO:0003206,GO:0003208,GO:0003214,GO:0003231,GO:0003401,GO:0003674,GO:0004888,GO:0004930,GO:0005102,GO:0005178,GO:…	-	ko:K02176	ko04310,map04310	-	-	-	ko00000,ko00001	-	-	-	Fz,NTR
LEUER_T0000371	tlr2	7897.ENSLACP00000014305	1.62e-198	590.0	COG4886@1|root,KOG4641@2759|Eukaryota,38EEZ@33154|Opisthokonta,3BFZ2@33208|Metazoa,3D3KM@33213|Bilateria,488PE@7711|Chordata,497CK@7742|Vertebrata	33208|Metazoa	T	toll-like receptor 2 signaling pathway	TLR2	GO:0001101,GO:0001505,GO:0001530,GO:0001540,GO:0001774,GO:0001775,GO:0001816,GO:0001817,GO:0001818,GO:0001819,GO:0001875,GO:0001932,GO:0001934,GO:0002218,GO:0002220,GO:0002221,GO:0002224,GO:0002237,GO:0002238,GO:0002252,GO:0002253,GO:0002263,GO:0002274,GO:0002275,GO:0002283,GO:0002366,GO:0002367,GO:0002374,GO:0002376,GO:0002429,GO:0002440,GO:0002443,GO:0002444,GO:0002446,GO:0002520,GO:0002521,GO:…	-	ko:K10159	ko04145,ko04151,ko04620,ko05134,ko05140,ko05142,ko05144,ko05145,ko05146,ko05152,ko05161,ko05162,ko05168,ko05205,ko05321,ko05323,map04145,map04151,map04620,map05134,map05140,map05142,map05144,map05145,map05146,map05152,map05161,map05162,map05168,map05205,map05321,map05323	M00686	-	-	ko00000,ko00001,ko00002,ko00536,ko04090,ko04131,ko04147	-	-	-	LRRCT,LRR_4,LRR_6,LRR_8,TIR
LEUER_T0000370	tlr2	7897.ENSLACP00000014305	1.62e-198	590.0	COG4886@1|root,KOG4641@2759|Eukaryota,38EEZ@33154|Opisthokonta,3BFZ2@33208|Metazoa,3D3KM@33213|Bilateria,488PE@7711|Chordata,497CK@7742|Vertebrata	33208|Metazoa	T	toll-like receptor 2 signaling pathway	TLR2	GO:0001101,GO:0001505,GO:0001530,GO:0001540,GO:0001774,GO:0001775,GO:0001816,GO:0001817,GO:0001818,GO:0001819,GO:0001875,GO:0001932,GO:0001934,GO:0002218,GO:0002220,GO:0002221,GO:0002224,GO:0002237,GO:0002238,GO:0002252,GO:0002253,GO:0002263,GO:0002274,GO:0002275,GO:0002283,GO:0002366,GO:0002367,GO:0002374,GO:0002376,GO:0002429,GO:0002440,GO:0002443,GO:0002444,GO:0002446,GO:0002520,GO:0002521,GO:…	-	ko:K10159	ko04145,ko04151,ko04620,ko05134,ko05140,ko05142,ko05144,ko05145,ko05146,ko05152,ko05161,ko05162,ko05168,ko05205,ko05321,ko05323,map04145,map04151,map04620,map05134,map05140,map05142,map05144,map05145,map05146,map05152,map05161,map05162,map05168,map05205,map05321,map05323	M00686	-	-	ko00000,ko00001,ko00002,ko00536,ko04090,ko04131,ko04147	-	-	-	LRRCT,LRR_4,LRR_6,LRR_8,TIR
LEUER_T0000373	mnd1	7897.ENSLACP00000011567	1.56e-89	267.0	COG5124@1|root,KOG3433@2759|Eukaryota,39R64@33154|Opisthokonta,3BEPV@33208|Metazoa,3CSR6@33213|Bilateria,481CV@7711|Chordata,492X5@7742|Vertebrata	33208|Metazoa	D	homologous recombination	MND1	GO:0000003,GO:0000280,GO:0003674,GO:0003676,GO:0003677,GO:0003690,GO:0005488,GO:0005575,GO:0005622,GO:0005623,GO:0005634,GO:0006139,GO:0006259,GO:0006281,GO:0006302,GO:0006310,GO:0006725,GO:0006807,GO:0006950,GO:0006974,GO:0006996,GO:0007049,GO:0007127,GO:0007131,GO:0008150,GO:0008152,GO:0009987,GO:0016043,GO:0022402,GO:0022414,GO:0033554,GO:0034641,GO:0035825,GO:0043170,GO:0043226,GO:0043227,GO:…	-	-	-	-	-	-	-	-	-	-	Mnd1
LEUER_T0000372	mnd1	7897.ENSLACP00000011567	1.28e-103	304.0	COG5124@1|root,KOG3433@2759|Eukaryota,39R64@33154|Opisthokonta,3BEPV@33208|Metazoa,3CSR6@33213|Bilateria,481CV@7711|Chordata,492X5@7742|Vertebrata	33208|Metazoa	D	homologous recombination	MND1	GO:0000003,GO:0000280,GO:0003674,GO:0003676,GO:0003677,GO:0003690,GO:0005488,GO:0005575,GO:0005622,GO:0005623,GO:0005634,GO:0006139,GO:0006259,GO:0006281,GO:0006302,GO:0006310,GO:0006725,GO:0006807,GO:0006950,GO:0006974,GO:0006996,GO:0007049,GO:0007127,GO:0007131,GO:0008150,GO:0008152,GO:0009987,GO:0016043,GO:0022402,GO:0022414,GO:0033554,GO:0034641,GO:0035825,GO:0043170,GO:0043226,GO:0043227,GO:…	-	-	-	-	-	-	-	-	-	-	Mnd1
LEUER_T0000374	mnd1	10036.XP_005080136.1	1.64e-78	239.0	COG5124@1|root,KOG3433@2759|Eukaryota,39R64@33154|Opisthokonta,3BEPV@33208|Metazoa,3CSR6@33213|Bilateria,481CV@7711|Chordata,492X5@7742|Vertebrata,3J8G4@40674|Mammalia,35CJ3@314146|Euarchontoglires,4Q07S@9989|Rodentia	33208|Metazoa	D	Mnd1 family	MND1	GO:0000003,GO:0000280,GO:0003674,GO:0003676,GO:0003677,GO:0003690,GO:0005488,GO:0005575,GO:0005622,GO:0005623,GO:0005634,GO:0006139,GO:0006259,GO:0006281,GO:0006302,GO:0006310,GO:0006725,GO:0006807,GO:0006950,GO:0006974,GO:0006996,GO:0007049,GO:0007127,GO:0007131,GO:0008150,GO:0008152,GO:0009987,GO:0016043,GO:0022402,GO:0022414,GO:0033554,GO:0034641,GO:0035825,GO:0043170,GO:0043226,GO:0043227,GO:…	-	-	-	-	-	-	-	-	-	-	Mnd1
LEUER_T0000375	trim2	8932.XP_005500894.1	0.0	891.0	KOG2177@1|root,KOG2177@2759|Eukaryota,38EA3@33154|Opisthokonta,3BFJH@33208|Metazoa,3CRTV@33213|Bilateria,47YXB@7711|Chordata,48WB8@7742|Vertebrata,4GSZA@8782|Aves	33208|Metazoa	O	Tripartite motif-containing protein 2	TRIM2	GO:0003674,GO:0003824,GO:0004842,GO:0005488,GO:0005515,GO:0005575,GO:0005622,GO:0005623,GO:0005737,GO:0006464,GO:0006807,GO:0008092,GO:0008150,GO:0008152,GO:0008270,GO:0009987,GO:0010033,GO:0010941,GO:0016567,GO:0016740,GO:0017022,GO:0019538,GO:0019787,GO:0032446,GO:0034097,GO:0036211,GO:0042221,GO:0042981,GO:0043067,GO:0043167,GO:0043169,GO:0043170,GO:0043412,GO:0043523,GO:0044237,GO:0044238,GO:…	-	ko:K11997	-	-	-	-	ko00000,ko04121	-	-	-	Filamin,NHL,zf-B_box,zf-RING_UBOX
LEUER_T0000381	trim2	128390.XP_009473011.1	0.0	1001.0	KOG2177@1|root,KOG2177@2759|Eukaryota,38EA3@33154|Opisthokonta,3BFJH@33208|Metazoa,3CRTV@33213|Bilateria,47YXB@7711|Chordata,48WB8@7742|Vertebrata,4GSZA@8782|Aves	33208|Metazoa	O	Tripartite motif-containing protein 2	TRIM2	GO:0003674,GO:0003824,GO:0004842,GO:0005488,GO:0005515,GO:0005575,GO:0005622,GO:0005623,GO:0005737,GO:0006464,GO:0006807,GO:0008092,GO:0008150,GO:0008152,GO:0008270,GO:0009987,GO:0010033,GO:0010941,GO:0016567,GO:0016740,GO:0017022,GO:0019538,GO:0019787,GO:0032446,GO:0034097,GO:0036211,GO:0042221,GO:0042981,GO:0043067,GO:0043167,GO:0043169,GO:0043170,GO:0043412,GO:0043523,GO:0044237,GO:0044238,GO:…	-	ko:K11997	-	-	-	-	ko00000,ko04121	-	-	-	Filamin,NHL,zf-B_box,zf-RING_UBOX
LEUER_T0000380	trim2	128390.XP_009473011.1	0.0	1001.0	KOG2177@1|root,KOG2177@2759|Eukaryota,38EA3@33154|Opisthokonta,3BFJH@33208|Metazoa,3CRTV@33213|Bilateria,47YXB@7711|Chordata,48WB8@7742|Vertebrata,4GSZA@8782|Aves	33208|Metazoa	O	Tripartite motif-containing protein 2	TRIM2	GO:0003674,GO:0003824,GO:0004842,GO:0005488,GO:0005515,GO:0005575,GO:0005622,GO:0005623,GO:0005737,GO:0006464,GO:0006807,GO:0008092,GO:0008150,GO:0008152,GO:0008270,GO:0009987,GO:0010033,GO:0010941,GO:0016567,GO:0016740,GO:0017022,GO:0019538,GO:0019787,GO:0032446,GO:0034097,GO:0036211,GO:0042221,GO:0042981,GO:0043067,GO:0043167,GO:0043169,GO:0043170,GO:0043412,GO:0043523,GO:0044237,GO:0044238,GO:…	-	ko:K11997	-	-	-	-	ko00000,ko04121	-	-	-	Filamin,NHL,zf-B_box,zf-RING_UBOX
LEUER_T0000382	trim2	128390.XP_009473011.1	0.0	1001.0	KOG2177@1|root,KOG2177@2759|Eukaryota,38EA3@33154|Opisthokonta,3BFJH@33208|Metazoa,3CRTV@33213|Bilateria,47YXB@7711|Chordata,48WB8@7742|Vertebrata,4GSZA@8782|Aves	33208|Metazoa	O	Tripartite motif-containing protein 2	TRIM2	GO:0003674,GO:0003824,GO:0004842,GO:0005488,GO:0005515,GO:0005575,GO:0005622,GO:0005623,GO:0005737,GO:0006464,GO:0006807,GO:0008092,GO:0008150,GO:0008152,GO:0008270,GO:0009987,GO:0010033,GO:0010941,GO:0016567,GO:0016740,GO:0017022,GO:0019538,GO:0019787,GO:0032446,GO:0034097,GO:0036211,GO:0042221,GO:0042981,GO:0043067,GO:0043167,GO:0043169,GO:0043170,GO:0043412,GO:0043523,GO:0044237,GO:0044238,GO:…	-	ko:K11997	-	-	-	-	ko00000,ko04121	-	-	-	Filamin,NHL,zf-B_box,zf-RING_UBOX
LEUER_T0000376	trim2	128390.XP_009473011.1	0.0	1001.0	KOG2177@1|root,KOG2177@2759|Eukaryota,38EA3@33154|Opisthokonta,3BFJH@33208|Metazoa,3CRTV@33213|Bilateria,47YXB@7711|Chordata,48WB8@7742|Vertebrata,4GSZA@8782|Aves	33208|Metazoa	O	Tripartite motif-containing protein 2	TRIM2	GO:0003674,GO:0003824,GO:0004842,GO:0005488,GO:0005515,GO:0005575,GO:0005622,GO:0005623,GO:0005737,GO:0006464,GO:0006807,GO:0008092,GO:0008150,GO:0008152,GO:0008270,GO:0009987,GO:0010033,GO:0010941,GO:0016567,GO:0016740,GO:0017022,GO:0019538,GO:0019787,GO:0032446,GO:0034097,GO:0036211,GO:0042221,GO:0042981,GO:0043067,GO:0043167,GO:0043169,GO:0043170,GO:0043412,GO:0043523,GO:0044237,GO:0044238,GO:…	-	ko:K11997	-	-	-	-	ko00000,ko04121	-	-	-	Filamin,NHL,zf-B_box,zf-RING_UBOX
LEUER_T0000377	trim2	128390.XP_009473011.1	0.0	1001.0	KOG2177@1|root,KOG2177@2759|Eukaryota,38EA3@33154|Opisthokonta,3BFJH@33208|Metazoa,3CRTV@33213|Bilateria,47YXB@7711|Chordata,48WB8@7742|Vertebrata,4GSZA@8782|Aves	33208|Metazoa	O	Tripartite motif-containing protein 2	TRIM2	GO:0003674,GO:0003824,GO:0004842,GO:0005488,GO:0005515,GO:0005575,GO:0005622,GO:0005623,GO:0005737,GO:0006464,GO:0006807,GO:0008092,GO:0008150,GO:0008152,GO:0008270,GO:0009987,GO:0010033,GO:0010941,GO:0016567,GO:0016740,GO:0017022,GO:0019538,GO:0019787,GO:0032446,GO:0034097,GO:0036211,GO:0042221,GO:0042981,GO:0043067,GO:0043167,GO:0043169,GO:0043170,GO:0043412,GO:0043523,GO:0044237,GO:0044238,GO:…	-	ko:K11997	-	-	-	-	ko00000,ko04121	-	-	-	Filamin,NHL,zf-B_box,zf-RING_UBOX
LEUER_T0000378	trim2	128390.XP_009473011.1	0.0	1001.0	KOG2177@1|root,KOG2177@2759|Eukaryota,38EA3@33154|Opisthokonta,3BFJH@33208|Metazoa,3CRTV@33213|Bilateria,47YXB@7711|Chordata,48WB8@7742|Vertebrata,4GSZA@8782|Aves	33208|Metazoa	O	Tripartite motif-containing protein 2	TRIM2	GO:0003674,GO:0003824,GO:0004842,GO:0005488,GO:0005515,GO:0005575,GO:0005622,GO:0005623,GO:0005737,GO:0006464,GO:0006807,GO:0008092,GO:0008150,GO:0008152,GO:0008270,GO:0009987,GO:0010033,GO:0010941,GO:0016567,GO:0016740,GO:0017022,GO:0019538,GO:0019787,GO:0032446,GO:0034097,GO:0036211,GO:0042221,GO:0042981,GO:0043067,GO:0043167,GO:0043169,GO:0043170,GO:0043412,GO:0043523,GO:0044237,GO:0044238,GO:…	-	ko:K11997	-	-	-	-	ko00000,ko04121	-	-	-	Filamin,NHL,zf-B_box,zf-RING_UBOX
LEUER_T0000379	trim2	128390.XP_009473011.1	0.0	1001.0	KOG2177@1|root,KOG2177@2759|Eukaryota,38EA3@33154|Opisthokonta,3BFJH@33208|Metazoa,3CRTV@33213|Bilateria,47YXB@7711|Chordata,48WB8@7742|Vertebrata,4GSZA@8782|Aves	33208|Metazoa	O	Tripartite motif-containing protein 2	TRIM2	GO:0003674,GO:0003824,GO:0004842,GO:0005488,GO:0005515,GO:0005575,GO:0005622,GO:0005623,GO:0005737,GO:0006464,GO:0006807,GO:0008092,GO:0008150,GO:0008152,GO:0008270,GO:0009987,GO:0010033,GO:0010941,GO:0016567,GO:0016740,GO:0017022,GO:0019538,GO:0019787,GO:0032446,GO:0034097,GO:0036211,GO:0042221,GO:0042981,GO:0043067,GO:0043167,GO:0043169,GO:0043170,GO:0043412,GO:0043523,GO:0044237,GO:0044238,GO:…	-	ko:K11997	-	-	-	-	ko00000,ko04121	-	-	-	Filamin,NHL,zf-B_box,zf-RING_UBOX
LEUER_T0000384	LOC116969709	7994.ENSAMXP00000012868	1.06e-16	74.7	KOG2177@1|root,KOG2177@2759|Eukaryota,38EA3@33154|Opisthokonta,3BFJH@33208|Metazoa,3CRTV@33213|Bilateria,47YXB@7711|Chordata,48WB8@7742|Vertebrata,4A12K@7898|Actinopterygii	33208|Metazoa	O	Tripartite motif-containing	TRIM3	GO:0003674,GO:0003824,GO:0004842,GO:0005488,GO:0005515,GO:0005575,GO:0005622,GO:0005623,GO:0005737,GO:0006464,GO:0006807,GO:0007275,GO:0007399,GO:0008022,GO:0008150,GO:0008152,GO:0009987,GO:0016567,GO:0016740,GO:0019538,GO:0019787,GO:0032446,GO:0032501,GO:0032502,GO:0036211,GO:0043170,GO:0043412,GO:0044237,GO:0044238,GO:0044260,GO:0044267,GO:0044424,GO:0044464,GO:0048731,GO:0048856,GO:0061630,GO:…	-	ko:K11997	-	-	-	-	ko00000,ko04121	-	-	-	Filamin,NHL,zf-B_box,zf-RING_UBOX
LEUER_T0000383	LOC116969709	9823.ENSSSCP00000009611	3.89e-73	231.0	KOG2177@1|root,KOG2177@2759|Eukaryota,38EA3@33154|Opisthokonta,3BFJH@33208|Metazoa,3CRTV@33213|Bilateria,47YXB@7711|Chordata,48WB8@7742|Vertebrata,3J83F@40674|Mammalia	33208|Metazoa	O	regulation of neuron apoptotic process	TRIM2	GO:0003674,GO:0003824,GO:0004842,GO:0005488,GO:0005515,GO:0005575,GO:0005622,GO:0005623,GO:0005737,GO:0006464,GO:0006807,GO:0008092,GO:0008150,GO:0008152,GO:0008270,GO:0009987,GO:0010033,GO:0010941,GO:0016567,GO:0016740,GO:0017022,GO:0019538,GO:0019787,GO:0032446,GO:0034097,GO:0036211,GO:0042221,GO:0042981,GO:0043067,GO:0043167,GO:0043169,GO:0043170,GO:0043412,GO:0043523,GO:0044237,GO:0044238,GO:…	-	ko:K11997	-	-	-	-	ko00000,ko04121	-	-	-	Filamin,NHL,zf-B_box,zf-RING_UBOX
LEUER_T0000386	LOC116972350	7918.ENSLOCP00000014841	1.12e-18	89.7	2CY62@1|root,2S2A2@2759|Eukaryota,3A3QD@33154|Opisthokonta,3BS78@33208|Metazoa,3D8KU@33213|Bilateria,48F9P@7711|Chordata,49C4P@7742|Vertebrata,4A3V9@7898|Actinopterygii	33208|Metazoa	T	Amphiregulin	AREG	-	-	ko:K09782	ko04010,ko04012,ko04151,ko04390,ko05210,map04010,map04012,map04151,map04390,map05210	-	-	-	ko00000,ko00001,ko00536,ko03110	-	-	-	-
LEUER_T0000388	LOC116972358	9402.XP_006907735.1	2.11e-24	100.0	2APXD@1|root,2RZHQ@2759|Eukaryota,39XVQ@33154|Opisthokonta,3BQB0@33208|Metazoa,3CSPE@33213|Bilateria,489ZY@7711|Chordata,491X9@7742|Vertebrata,3JFPS@40674|Mammalia,4M2V2@9397|Chiroptera	33208|Metazoa	T	Epidermal growth factor-like domain.	BTC	GO:0000165,GO:0003008,GO:0003014,GO:0003674,GO:0003824,GO:0004672,GO:0004713,GO:0005085,GO:0005088,GO:0005102,GO:0005154,GO:0005488,GO:0005515,GO:0005575,GO:0005576,GO:0005615,GO:0005623,GO:0005886,GO:0006464,GO:0006468,GO:0006629,GO:0006644,GO:0006650,GO:0006793,GO:0006796,GO:0006807,GO:0007088,GO:0007154,GO:0007165,GO:0007166,GO:0007167,GO:0007169,GO:0007173,GO:0007346,GO:0008083,GO:0008150,GO:…	-	ko:K09783	ko04012,map04012	-	-	-	ko00000,ko00001,ko00536	-	-	-	EGF
LEUER_T0000389	rchy1	7918.ENSLOCP00000015370	4.09e-136	390.0	KOG1940@1|root,KOG1940@2759|Eukaryota,3920W@33154|Opisthokonta,3BGEA@33208|Metazoa,3CUF4@33213|Bilateria,4865H@7711|Chordata,4940J@7742|Vertebrata,49X4D@7898|Actinopterygii	33208|Metazoa	O	RING finger and CHY zinc finger	RCHY1	GO:0000151,GO:0000731,GO:0002039,GO:0003674,GO:0003824,GO:0004842,GO:0005102,GO:0005488,GO:0005515,GO:0005575,GO:0005622,GO:0005623,GO:0005634,GO:0005654,GO:0005737,GO:0005829,GO:0006139,GO:0006259,GO:0006281,GO:0006301,GO:0006464,GO:0006508,GO:0006511,GO:0006725,GO:0006807,GO:0006950,GO:0006974,GO:0008150,GO:0008152,GO:0008270,GO:0009056,GO:0009057,GO:0009058,GO:0009059,GO:0009893,GO:0009894,GO:…	2.3.2.27	ko:K10144	ko04115,ko04120,ko05162,map04115,map04120,map05162	-	-	-	ko00000,ko00001,ko01000,ko04121	-	-	-	zf-CHY,zf-RING_2,zinc_ribbon_6
LEUER_T0000397	g3bp2	8479.XP_005284038.1	6.63e-235	659.0	KOG0116@1|root,KOG0116@2759|Eukaryota,390RG@33154|Opisthokonta,3B9P4@33208|Metazoa,3CZ8D@33213|Bilateria,485FV@7711|Chordata,496DR@7742|Vertebrata,4CH82@8459|Testudines	33208|Metazoa	A	Ras GTPase-activating protein-binding protein 2	G3BP2	GO:0000003,GO:0000375,GO:0000377,GO:0000398,GO:0001654,GO:0001736,GO:0001738,GO:0001745,GO:0001751,GO:0001752,GO:0001754,GO:0002009,GO:0002064,GO:0002065,GO:0002066,GO:0003002,GO:0003006,GO:0003674,GO:0003676,GO:0003723,GO:0003729,GO:0005198,GO:0005488,GO:0005515,GO:0005575,GO:0005622,GO:0005623,GO:0005737,GO:0005829,GO:0006139,GO:0006355,GO:0006396,GO:0006397,GO:0006725,GO:0006807,GO:0007154,GO:…	3.6.4.12,3.6.4.13	ko:K17265	-	-	-	-	ko00000,ko01000,ko03019,ko04147	-	-	-	NTF2,RRM_1
LEUER_T0000398	g3bp2	8479.XP_005284038.1	1.4e-201	573.0	KOG0116@1|root,KOG0116@2759|Eukaryota,390RG@33154|Opisthokonta,3B9P4@33208|Metazoa,3CZ8D@33213|Bilateria,485FV@7711|Chordata,496DR@7742|Vertebrata,4CH82@8459|Testudines	33208|Metazoa	A	Ras GTPase-activating protein-binding protein 2	G3BP2	GO:0000003,GO:0000375,GO:0000377,GO:0000398,GO:0001654,GO:0001736,GO:0001738,GO:0001745,GO:0001751,GO:0001752,GO:0001754,GO:0002009,GO:0002064,GO:0002065,GO:0002066,GO:0003002,GO:0003006,GO:0003674,GO:0003676,GO:0003723,GO:0003729,GO:0005198,GO:0005488,GO:0005515,GO:0005575,GO:0005622,GO:0005623,GO:0005737,GO:0005829,GO:0006139,GO:0006355,GO:0006396,GO:0006397,GO:0006725,GO:0006807,GO:0007154,GO:…	3.6.4.12,3.6.4.13	ko:K17265	-	-	-	-	ko00000,ko01000,ko03019,ko04147	-	-	-	NTF2,RRM_1
LEUER_T0000399	uso1	60711.ENSCSAP00000001016	0.0	1263.0	KOG0946@1|root,KOG0946@2759|Eukaryota,38E2Z@33154|Opisthokonta,3BHQZ@33208|Metazoa,3CTX4@33213|Bilateria,47ZM6@7711|Chordata,48WPW@7742|Vertebrata,3J5AB@40674|Mammalia,359UY@314146|Euarchontoglires,4M7YX@9443|Primates,3647P@314294|Cercopithecoidea	33208|Metazoa	U	USO1 vesicle transport factor	USO1	GO:0000139,GO:0001650,GO:0002009,GO:0002165,GO:0003674,GO:0005215,GO:0005488,GO:0005515,GO:0005575,GO:0005622,GO:0005623,GO:0005634,GO:0005730,GO:0005737,GO:0005783,GO:0005794,GO:0005795,GO:0005798,GO:0005829,GO:0006810,GO:0006886,GO:0006888,GO:0006891,GO:0006900,GO:0006901,GO:0006903,GO:0006996,GO:0007030,GO:0007275,GO:0007346,GO:0007444,GO:0007472,GO:0007476,GO:0007552,GO:0007560,GO:0008104,GO:…	-	-	-	-	-	-	-	-	-	-	Uso1_p115_C,Uso1_p115_head
LEUER_T0000400	uso1	482537.XP_008565521.1	0.0	1269.0	KOG0946@1|root,KOG0946@2759|Eukaryota,38E2Z@33154|Opisthokonta,3BHQZ@33208|Metazoa,3CTX4@33213|Bilateria,47ZM6@7711|Chordata,48WPW@7742|Vertebrata,3J5AB@40674|Mammalia,359UY@314146|Euarchontoglires	33208|Metazoa	U	transport factor	USO1	GO:0000139,GO:0001650,GO:0002009,GO:0002165,GO:0003674,GO:0005215,GO:0005488,GO:0005515,GO:0005575,GO:0005622,GO:0005623,GO:0005634,GO:0005730,GO:0005737,GO:0005783,GO:0005794,GO:0005795,GO:0005798,GO:0005829,GO:0006810,GO:0006886,GO:0006888,GO:0006891,GO:0006900,GO:0006901,GO:0006903,GO:0006996,GO:0007030,GO:0007275,GO:0007346,GO:0007444,GO:0007472,GO:0007476,GO:0007552,GO:0007560,GO:0008104,GO:…	-	-	-	-	-	-	-	-	-	-	Uso1_p115_C,Uso1_p115_head
LEUER_T0000401	uso1	60711.ENSCSAP00000001016	0.0	1258.0	KOG0946@1|root,KOG0946@2759|Eukaryota,38E2Z@33154|Opisthokonta,3BHQZ@33208|Metazoa,3CTX4@33213|Bilateria,47ZM6@7711|Chordata,48WPW@7742|Vertebrata,3J5AB@40674|Mammalia,359UY@314146|Euarchontoglires,4M7YX@9443|Primates,3647P@314294|Cercopithecoidea	33208|Metazoa	U	USO1 vesicle transport factor	USO1	GO:0000139,GO:0001650,GO:0002009,GO:0002165,GO:0003674,GO:0005215,GO:0005488,GO:0005515,GO:0005575,GO:0005622,GO:0005623,GO:0005634,GO:0005730,GO:0005737,GO:0005783,GO:0005794,GO:0005795,GO:0005798,GO:0005829,GO:0006810,GO:0006886,GO:0006888,GO:0006891,GO:0006900,GO:0006901,GO:0006903,GO:0006996,GO:0007030,GO:0007275,GO:0007346,GO:0007444,GO:0007472,GO:0007476,GO:0007552,GO:0007560,GO:0008104,GO:…	-	-	-	-	-	-	-	-	-	-	Uso1_p115_C,Uso1_p115_head
LEUER_T0000403	uso1	60711.ENSCSAP00000001016	0.0	1259.0	KOG0946@1|root,KOG0946@2759|Eukaryota,38E2Z@33154|Opisthokonta,3BHQZ@33208|Metazoa,3CTX4@33213|Bilateria,47ZM6@7711|Chordata,48WPW@7742|Vertebrata,3J5AB@40674|Mammalia,359UY@314146|Euarchontoglires,4M7YX@9443|Primates,3647P@314294|Cercopithecoidea	33208|Metazoa	U	USO1 vesicle transport factor	USO1	GO:0000139,GO:0001650,GO:0002009,GO:0002165,GO:0003674,GO:0005215,GO:0005488,GO:0005515,GO:0005575,GO:0005622,GO:0005623,GO:0005634,GO:0005730,GO:0005737,GO:0005783,GO:0005794,GO:0005795,GO:0005798,GO:0005829,GO:0006810,GO:0006886,GO:0006888,GO:0006891,GO:0006900,GO:0006901,GO:0006903,GO:0006996,GO:0007030,GO:0007275,GO:0007346,GO:0007444,GO:0007472,GO:0007476,GO:0007552,GO:0007560,GO:0008104,GO:…	-	-	-	-	-	-	-	-	-	-	Uso1_p115_C,Uso1_p115_head
LEUER_T0000404	uso1	482537.XP_008565521.1	0.0	1256.0	KOG0946@1|root,KOG0946@2759|Eukaryota,38E2Z@33154|Opisthokonta,3BHQZ@33208|Metazoa,3CTX4@33213|Bilateria,47ZM6@7711|Chordata,48WPW@7742|Vertebrata,3J5AB@40674|Mammalia,359UY@314146|Euarchontoglires	33208|Metazoa	U	transport factor	USO1	GO:0000139,GO:0001650,GO:0002009,GO:0002165,GO:0003674,GO:0005215,GO:0005488,GO:0005515,GO:0005575,GO:0005622,GO:0005623,GO:0005634,GO:0005730,GO:0005737,GO:0005783,GO:0005794,GO:0005795,GO:0005798,GO:0005829,GO:0006810,GO:0006886,GO:0006888,GO:0006891,GO:0006900,GO:0006901,GO:0006903,GO:0006996,GO:0007030,GO:0007275,GO:0007346,GO:0007444,GO:0007472,GO:0007476,GO:0007552,GO:0007560,GO:0008104,GO:…	-	-	-	-	-	-	-	-	-	-	Uso1_p115_C,Uso1_p115_head
LEUER_T0000405	uso1	482537.XP_008565521.1	0.0	1263.0	KOG0946@1|root,KOG0946@2759|Eukaryota,38E2Z@33154|Opisthokonta,3BHQZ@33208|Metazoa,3CTX4@33213|Bilateria,47ZM6@7711|Chordata,48WPW@7742|Vertebrata,3J5AB@40674|Mammalia,359UY@314146|Euarchontoglires	33208|Metazoa	U	transport factor	USO1	GO:0000139,GO:0001650,GO:0002009,GO:0002165,GO:0003674,GO:0005215,GO:0005488,GO:0005515,GO:0005575,GO:0005622,GO:0005623,GO:0005634,GO:0005730,GO:0005737,GO:0005783,GO:0005794,GO:0005795,GO:0005798,GO:0005829,GO:0006810,GO:0006886,GO:0006888,GO:0006891,GO:0006900,GO:0006901,GO:0006903,GO:0006996,GO:0007030,GO:0007275,GO:0007346,GO:0007444,GO:0007472,GO:0007476,GO:0007552,GO:0007560,GO:0008104,GO:…	-	-	-	-	-	-	-	-	-	-	Uso1_p115_C,Uso1_p115_head
LEUER_T0000402	uso1	60711.ENSCSAP00000001016	0.0	1258.0	KOG0946@1|root,KOG0946@2759|Eukaryota,38E2Z@33154|Opisthokonta,3BHQZ@33208|Metazoa,3CTX4@33213|Bilateria,47ZM6@7711|Chordata,48WPW@7742|Vertebrata,3J5AB@40674|Mammalia,359UY@314146|Euarchontoglires,4M7YX@9443|Primates,3647P@314294|Cercopithecoidea	33208|Metazoa	U	USO1 vesicle transport factor	USO1	GO:0000139,GO:0001650,GO:0002009,GO:0002165,GO:0003674,GO:0005215,GO:0005488,GO:0005515,GO:0005575,GO:0005622,GO:0005623,GO:0005634,GO:0005730,GO:0005737,GO:0005783,GO:0005794,GO:0005795,GO:0005798,GO:0005829,GO:0006810,GO:0006886,GO:0006888,GO:0006891,GO:0006900,GO:0006901,GO:0006903,GO:0006996,GO:0007030,GO:0007275,GO:0007346,GO:0007444,GO:0007472,GO:0007476,GO:0007552,GO:0007560,GO:0008104,GO:…	-	-	-	-	-	-	-	-	-	-	Uso1_p115_C,Uso1_p115_head
LEUER_T0000406	LOC116972437	128390.XP_009466010.1	7.97e-89	296.0	KOG4004@1|root,KOG4004@2759|Eukaryota,38F55@33154|Opisthokonta,3B9E6@33208|Metazoa,3D2T7@33213|Bilateria,487KW@7711|Chordata,48Y0U@7742|Vertebrata,4GQUG@8782|Aves	33208|Metazoa	W	SPARC-like protein 1	SPARCL1	GO:0003674,GO:0005488,GO:0005509,GO:0005518,GO:0005575,GO:0005576,GO:0005615,GO:0005622,GO:0005623,GO:0005737,GO:0005783,GO:0005788,GO:0006464,GO:0006807,GO:0008150,GO:0008152,GO:0009987,GO:0012505,GO:0019538,GO:0031974,GO:0032502,GO:0036211,GO:0043167,GO:0043169,GO:0043170,GO:0043226,GO:0043227,GO:0043229,GO:0043231,GO:0043233,GO:0043412,GO:0043687,GO:0044237,GO:0044238,GO:0044260,GO:0044267,GO:…	-	-	-	-	-	-	-	-	-	-	FOLN,Kazal_1,SPARC_Ca_bdg
LEUER_T0000408	pkd2	7897.ENSLACP00000004922	0.0	1177.0	KOG3599@1|root,KOG3599@2759|Eukaryota,38E7E@33154|Opisthokonta,3BG4C@33208|Metazoa,3CUR7@33213|Bilateria,482V3@7711|Chordata,48Y04@7742|Vertebrata	33208|Metazoa	PT	Polycystin 2, transient receptor potential cation channel	PKD2	GO:0000003,GO:0000079,GO:0000226,GO:0000302,GO:0001101,GO:0001505,GO:0001568,GO:0001655,GO:0001656,GO:0001657,GO:0001658,GO:0001701,GO:0001763,GO:0001822,GO:0001823,GO:0001889,GO:0001890,GO:0001892,GO:0001932,GO:0001934,GO:0001944,GO:0001945,GO:0001946,GO:0001947,GO:0002009,GO:0002133,GO:0003002,GO:0003006,GO:0003007,GO:0003008,GO:0003012,GO:0003127,GO:0003143,GO:0003146,GO:0003170,GO:0003171,GO:…	-	ko:K04986,ko:K04990	ko04742,map04742	-	-	-	ko00000,ko00001,ko03036,ko04040	1.A.5.1.3,1.A.5.2.1,1.A.5.2.2,1.A.5.2.4	-	-	PKD_channel
LEUER_T0000409	LOC116972453	10029.XP_007615854.1	7.53e-302	830.0	COG0639@1|root,KOG0375@2759|Eukaryota,38BQG@33154|Opisthokonta,3BAVD@33208|Metazoa,3CSW7@33213|Bilateria,486S2@7711|Chordata,48W4H@7742|Vertebrata,3JC8I@40674|Mammalia,35BW2@314146|Euarchontoglires	33208|Metazoa	T	positive regulation of cardiac muscle adaptation	PPP3CA	GO:0000082,GO:0000278,GO:0001678,GO:0001775,GO:0001975,GO:0002376,GO:0002682,GO:0002764,GO:0002768,GO:0002791,GO:0002792,GO:0003008,GO:0003012,GO:0003299,GO:0003300,GO:0003674,GO:0003824,GO:0004721,GO:0004722,GO:0004723,GO:0005488,GO:0005509,GO:0005515,GO:0005516,GO:0005575,GO:0005622,GO:0005623,GO:0005634,GO:0005654,GO:0005737,GO:0005739,GO:0005829,GO:0005955,GO:0006355,GO:0006357,GO:0006464,GO:…	3.1.3.16	ko:K04348	ko04010,ko04020,ko04022,ko04114,ko04218,ko04310,ko04360,ko04370,ko04380,ko04650,ko04658,ko04659,ko04660,ko04662,ko04720,ko04724,ko04728,ko04921,ko04922,ko04924,ko05010,ko05014,ko05031,ko05152,ko05166,ko05167,map04010,map04020,map04022,map04114,map04218,map04310,map04360,map04370,map04380,map04650,map04658,map04659,map04660,map04662,map04720,map04724,map04728,map04921,map04922,map04924,map05010,ma…	-	-	-	ko00000,ko00001,ko01000,ko01009	-	-	-	Metallophos
LEUER_T0000410	LOC116972453	10029.XP_007615854.1	1.66e-305	839.0	COG0639@1|root,KOG0375@2759|Eukaryota,38BQG@33154|Opisthokonta,3BAVD@33208|Metazoa,3CSW7@33213|Bilateria,486S2@7711|Chordata,48W4H@7742|Vertebrata,3JC8I@40674|Mammalia,35BW2@314146|Euarchontoglires	33208|Metazoa	T	positive regulation of cardiac muscle adaptation	PPP3CA	GO:0000082,GO:0000278,GO:0001678,GO:0001775,GO:0001975,GO:0002376,GO:0002682,GO:0002764,GO:0002768,GO:0002791,GO:0002792,GO:0003008,GO:0003012,GO:0003299,GO:0003300,GO:0003674,GO:0003824,GO:0004721,GO:0004722,GO:0004723,GO:0005488,GO:0005509,GO:0005515,GO:0005516,GO:0005575,GO:0005622,GO:0005623,GO:0005634,GO:0005654,GO:0005737,GO:0005739,GO:0005829,GO:0005955,GO:0006355,GO:0006357,GO:0006464,GO:…	3.1.3.16	ko:K04348	ko04010,ko04020,ko04022,ko04114,ko04218,ko04310,ko04360,ko04370,ko04380,ko04650,ko04658,ko04659,ko04660,ko04662,ko04720,ko04724,ko04728,ko04921,ko04922,ko04924,ko05010,ko05014,ko05031,ko05152,ko05166,ko05167,map04010,map04020,map04022,map04114,map04218,map04310,map04360,map04370,map04380,map04650,map04658,map04659,map04660,map04662,map04720,map04724,map04728,map04921,map04922,map04924,map05010,ma…	-	-	-	ko00000,ko00001,ko01000,ko01009	-	-	-	Metallophos
LEUER_T0000411	arhgef38	7897.ENSLACP00000012019	1.46e-285	813.0	KOG3519@1|root,KOG3519@2759|Eukaryota,38GD5@33154|Opisthokonta,3BEUS@33208|Metazoa,3D1HU@33213|Bilateria,480JE@7711|Chordata,4947B@7742|Vertebrata	33208|Metazoa	T	Rho guanine nucleotide exchange factor	ARHGEF38	GO:0003674,GO:0005085,GO:0005088,GO:0005089,GO:0005488,GO:0005515,GO:0007154,GO:0007165,GO:0007264,GO:0008150,GO:0009987,GO:0017016,GO:0017048,GO:0019899,GO:0023052,GO:0031267,GO:0035556,GO:0043085,GO:0043087,GO:0043547,GO:0044093,GO:0050789,GO:0050790,GO:0050794,GO:0050896,GO:0051020,GO:0051336,GO:0051345,GO:0051716,GO:0065007,GO:0065009,GO:0098772	-	ko:K20711	-	-	-	-	ko00000,ko04131	-	-	-	BAR,RhoGEF,SH3_2,SH3_9
LEUER_T0000412	abcg2	8469.XP_007066704.1	1.02e-281	793.0	COG1131@1|root,KOG0061@2759|Eukaryota,38CVQ@33154|Opisthokonta,3BCP7@33208|Metazoa,3CWB5@33213|Bilateria,481XE@7711|Chordata,496DT@7742|Vertebrata,4CBS6@8459|Testudines	33208|Metazoa	Q	ABC-2 type transporter	ABCG2	GO:0000003,GO:0000166,GO:0001101,GO:0002237,GO:0003008,GO:0003674,GO:0003824,GO:0005215,GO:0005488,GO:0005515,GO:0005524,GO:0005575,GO:0005622,GO:0005623,GO:0005634,GO:0005886,GO:0005975,GO:0006082,GO:0006725,GO:0006807,GO:0006810,GO:0006811,GO:0006820,GO:0006855,GO:0006869,GO:0006873,GO:0006875,GO:0006879,GO:0007275,GO:0007565,GO:0007568,GO:0007584,GO:0007588,GO:0008092,GO:0008144,GO:0008150,GO:…	-	ko:K05681,ko:K05682	ko01523,ko02010,ko04976,map01523,map02010,map04976	-	-	-	ko00000,ko00001,ko02000,ko04090,ko04147	3.A.1.204	-	-	ABC2_membrane,ABC_tran
LEUER_T0000413	abcg2	8469.XP_007066704.1	1.02e-281	793.0	COG1131@1|root,KOG0061@2759|Eukaryota,38CVQ@33154|Opisthokonta,3BCP7@33208|Metazoa,3CWB5@33213|Bilateria,481XE@7711|Chordata,496DT@7742|Vertebrata,4CBS6@8459|Testudines	33208|Metazoa	Q	ABC-2 type transporter	ABCG2	GO:0000003,GO:0000166,GO:0001101,GO:0002237,GO:0003008,GO:0003674,GO:0003824,GO:0005215,GO:0005488,GO:0005515,GO:0005524,GO:0005575,GO:0005622,GO:0005623,GO:0005634,GO:0005886,GO:0005975,GO:0006082,GO:0006725,GO:0006807,GO:0006810,GO:0006811,GO:0006820,GO:0006855,GO:0006869,GO:0006873,GO:0006875,GO:0006879,GO:0007275,GO:0007565,GO:0007568,GO:0007584,GO:0007588,GO:0008092,GO:0008144,GO:0008150,GO:…	-	ko:K05681,ko:K05682	ko01523,ko02010,ko04976,map01523,map02010,map04976	-	-	-	ko00000,ko00001,ko02000,ko04090,ko04147	3.A.1.204	-	-	ABC2_membrane,ABC_tran
LEUER_T0000414	rbm46	7897.ENSLACP00000002309	0.0	906.0	KOG0117@1|root,KOG0117@2759|Eukaryota,38B4M@33154|Opisthokonta,3BBMN@33208|Metazoa,3CX2K@33213|Bilateria,4888Z@7711|Chordata,491YY@7742|Vertebrata	33208|Metazoa	A	RNA binding	RBM46	GO:0001701,GO:0001824,GO:0001825,GO:0001829,GO:0003674,GO:0003676,GO:0003723,GO:0005488,GO:0005575,GO:0005622,GO:0005623,GO:0005634,GO:0007275,GO:0008150,GO:0009653,GO:0009790,GO:0009792,GO:0009892,GO:0009893,GO:0009894,GO:0009895,GO:0009987,GO:0010468,GO:0010604,GO:0010605,GO:0010608,GO:0010628,GO:0019219,GO:0019222,GO:0030154,GO:0031323,GO:0031324,GO:0031329,GO:0031330,GO:0032501,GO:0032502,GO:…	-	-	-	-	-	-	-	-	-	-	DND1_DSRM,RRM_1
LEUER_T0000417	LOC116972511	9823.ENSSSCP00000009540	5.56e-113	347.0	KOG4211@1|root,KOG4211@2759|Eukaryota,39RSP@33154|Opisthokonta,3BBH6@33208|Metazoa,3CYQY@33213|Bilateria,4801E@7711|Chordata,4905H@7742|Vertebrata,3J46A@40674|Mammalia,4IZ0R@91561|Cetartiodactyla	33208|Metazoa	A	factor 1	GRSF1	GO:0002009,GO:0003002,GO:0003674,GO:0003676,GO:0003723,GO:0003729,GO:0005488,GO:0005575,GO:0005622,GO:0005623,GO:0005737,GO:0005739,GO:0005759,GO:0006139,GO:0006378,GO:0006396,GO:0006397,GO:0006725,GO:0006807,GO:0007275,GO:0007389,GO:0008150,GO:0008152,GO:0009295,GO:0009653,GO:0009790,GO:0009888,GO:0009952,GO:0009987,GO:0010467,GO:0016070,GO:0016071,GO:0016331,GO:0031123,GO:0031124,GO:0031974,GO:…	-	-	-	-	-	-	-	-	-	-	RRM_1
LEUER_T0000418	slc4a4	10160.XP_004646603.1	0.0	1039.0	KOG1172@1|root,KOG1172@2759|Eukaryota,38BCI@33154|Opisthokonta,3BA46@33208|Metazoa,3CWAD@33213|Bilateria,488JZ@7711|Chordata,48Z0D@7742|Vertebrata,3J93N@40674|Mammalia,35G0R@314146|Euarchontoglires,4PSKE@9989|Rodentia	33208|Metazoa	P	sodium:bicarbonate symporter activity	SLC4A4	GO:0003674,GO:0005215,GO:0005488,GO:0005515,GO:0005575,GO:0005623,GO:0005886,GO:0005887,GO:0006810,GO:0006811,GO:0006812,GO:0006814,GO:0006820,GO:0006821,GO:0006873,GO:0006885,GO:0007154,GO:0007267,GO:0007268,GO:0007271,GO:0008150,GO:0008324,GO:0008509,GO:0008510,GO:0008514,GO:0009987,GO:0010646,GO:0015075,GO:0015077,GO:0015081,GO:0015103,GO:0015106,GO:0015108,GO:0015291,GO:0015293,GO:0015294,GO:…	-	ko:K13575,ko:K13858,ko:K13859,ko:K13861	ko04964,ko04972,ko04976,map04964,map04972,map04976	-	-	-	ko00000,ko00001,ko02000,ko03036	2.A.31.2.1,2.A.31.2.2,2.A.31.2.3,2.A.31.2.4,2.A.31.2.9	-	-	Band_3_cyto,HCO3_cotransp
LEUER_T0000419	slc4a4	10160.XP_004646603.1	0.0	1020.0	KOG1172@1|root,KOG1172@2759|Eukaryota,38BCI@33154|Opisthokonta,3BA46@33208|Metazoa,3CWAD@33213|Bilateria,488JZ@7711|Chordata,48Z0D@7742|Vertebrata,3J93N@40674|Mammalia,35G0R@314146|Euarchontoglires,4PSKE@9989|Rodentia	33208|Metazoa	P	sodium:bicarbonate symporter activity	SLC4A4	GO:0003674,GO:0005215,GO:0005488,GO:0005515,GO:0005575,GO:0005623,GO:0005886,GO:0005887,GO:0006810,GO:0006811,GO:0006812,GO:0006814,GO:0006820,GO:0006821,GO:0006873,GO:0006885,GO:0007154,GO:0007267,GO:0007268,GO:0007271,GO:0008150,GO:0008324,GO:0008509,GO:0008510,GO:0008514,GO:0009987,GO:0010646,GO:0015075,GO:0015077,GO:0015081,GO:0015103,GO:0015106,GO:0015108,GO:0015291,GO:0015293,GO:0015294,GO:…	-	ko:K13575,ko:K13858,ko:K13859,ko:K13861	ko04964,ko04972,ko04976,map04964,map04972,map04976	-	-	-	ko00000,ko00001,ko02000,ko03036	2.A.31.2.1,2.A.31.2.2,2.A.31.2.3,2.A.31.2.4,2.A.31.2.9	-	-	Band_3_cyto,HCO3_cotransp
LEUER_T0000420	slc4a4	10160.XP_004646603.1	0.0	1020.0	KOG1172@1|root,KOG1172@2759|Eukaryota,38BCI@33154|Opisthokonta,3BA46@33208|Metazoa,3CWAD@33213|Bilateria,488JZ@7711|Chordata,48Z0D@7742|Vertebrata,3J93N@40674|Mammalia,35G0R@314146|Euarchontoglires,4PSKE@9989|Rodentia	33208|Metazoa	P	sodium:bicarbonate symporter activity	SLC4A4	GO:0003674,GO:0005215,GO:0005488,GO:0005515,GO:0005575,GO:0005623,GO:0005886,GO:0005887,GO:0006810,GO:0006811,GO:0006812,GO:0006814,GO:0006820,GO:0006821,GO:0006873,GO:0006885,GO:0007154,GO:0007267,GO:0007268,GO:0007271,GO:0008150,GO:0008324,GO:0008509,GO:0008510,GO:0008514,GO:0009987,GO:0010646,GO:0015075,GO:0015077,GO:0015081,GO:0015103,GO:0015106,GO:0015108,GO:0015291,GO:0015293,GO:0015294,GO:…	-	ko:K13575,ko:K13858,ko:K13859,ko:K13861	ko04964,ko04972,ko04976,map04964,map04972,map04976	-	-	-	ko00000,ko00001,ko02000,ko03036	2.A.31.2.1,2.A.31.2.2,2.A.31.2.3,2.A.31.2.4,2.A.31.2.9	-	-	Band_3_cyto,HCO3_cotransp
LEUER_T0000421	slc4a4	10160.XP_004646603.1	0.0	1039.0	KOG1172@1|root,KOG1172@2759|Eukaryota,38BCI@33154|Opisthokonta,3BA46@33208|Metazoa,3CWAD@33213|Bilateria,488JZ@7711|Chordata,48Z0D@7742|Vertebrata,3J93N@40674|Mammalia,35G0R@314146|Euarchontoglires,4PSKE@9989|Rodentia	33208|Metazoa	P	sodium:bicarbonate symporter activity	SLC4A4	GO:0003674,GO:0005215,GO:0005488,GO:0005515,GO:0005575,GO:0005623,GO:0005886,GO:0005887,GO:0006810,GO:0006811,GO:0006812,GO:0006814,GO:0006820,GO:0006821,GO:0006873,GO:0006885,GO:0007154,GO:0007267,GO:0007268,GO:0007271,GO:0008150,GO:0008324,GO:0008509,GO:0008510,GO:0008514,GO:0009987,GO:0010646,GO:0015075,GO:0015077,GO:0015081,GO:0015103,GO:0015106,GO:0015108,GO:0015291,GO:0015293,GO:0015294,GO:…	-	ko:K13575,ko:K13858,ko:K13859,ko:K13861	ko04964,ko04972,ko04976,map04964,map04972,map04976	-	-	-	ko00000,ko00001,ko02000,ko03036	2.A.31.2.1,2.A.31.2.2,2.A.31.2.3,2.A.31.2.4,2.A.31.2.9	-	-	Band_3_cyto,HCO3_cotransp
LEUER_T0000422	nfkb1	176946.XP_007429861.1	1.56e-128	399.0	COG0666@1|root,KOG0504@2759|Eukaryota,38EM0@33154|Opisthokonta,3BACK@33208|Metazoa,3CUN1@33213|Bilateria,4827G@7711|Chordata,491P6@7742|Vertebrata	33208|Metazoa	K	Nuclear factor of kappa light polypeptide gene enhancer in B-cells 1	NFKB1	GO:0000122,GO:0000165,GO:0000228,GO:0000785,GO:0000790,GO:0000791,GO:0000902,GO:0000904,GO:0000976,GO:0000977,GO:0000980,GO:0000981,GO:0000982,GO:0001012,GO:0001067,GO:0001077,GO:0001158,GO:0001205,GO:0001227,GO:0001228,GO:0001505,GO:0001775,GO:0001817,GO:0001818,GO:0001819,GO:0002218,GO:0002220,GO:0002223,GO:0002225,GO:0002230,GO:0002237,GO:0002252,GO:0002253,GO:0002263,GO:0002274,GO:0002275,GO:…	-	ko:K02580,ko:K04469	ko01523,ko04010,ko04014,ko04024,ko04062,ko04064,ko04066,ko04071,ko04151,ko04210,ko04211,ko04218,ko04380,ko04620,ko04621,ko04622,ko04623,ko04624,ko04657,ko04658,ko04659,ko04660,ko04662,ko04668,ko04722,ko04917,ko04920,ko04926,ko04931,ko04932,ko04933,ko05030,ko05120,ko05131,ko05132,ko05133,ko05134,ko05140,ko05142,ko05145,ko05146,ko05152,ko05160,ko05161,ko05162,ko05164,ko05165,ko05166,ko05167,ko05168…	M00686	-	-	ko00000,ko00001,ko00002,ko03000	-	-	-	Ank_2,Ank_4,Death,RHD_DNA_bind,RHD_dimer
LEUER_T0000423	nfkb1	176946.XP_007429861.1	3.51e-131	405.0	COG0666@1|root,KOG0504@2759|Eukaryota,38EM0@33154|Opisthokonta,3BACK@33208|Metazoa,3CUN1@33213|Bilateria,4827G@7711|Chordata,491P6@7742|Vertebrata	33208|Metazoa	K	Nuclear factor of kappa light polypeptide gene enhancer in B-cells 1	NFKB1	GO:0000122,GO:0000165,GO:0000228,GO:0000785,GO:0000790,GO:0000791,GO:0000902,GO:0000904,GO:0000976,GO:0000977,GO:0000980,GO:0000981,GO:0000982,GO:0001012,GO:0001067,GO:0001077,GO:0001158,GO:0001205,GO:0001227,GO:0001228,GO:0001505,GO:0001775,GO:0001817,GO:0001818,GO:0001819,GO:0002218,GO:0002220,GO:0002223,GO:0002225,GO:0002230,GO:0002237,GO:0002252,GO:0002253,GO:0002263,GO:0002274,GO:0002275,GO:…	-	ko:K02580,ko:K04469	ko01523,ko04010,ko04014,ko04024,ko04062,ko04064,ko04066,ko04071,ko04151,ko04210,ko04211,ko04218,ko04380,ko04620,ko04621,ko04622,ko04623,ko04624,ko04657,ko04658,ko04659,ko04660,ko04662,ko04668,ko04722,ko04917,ko04920,ko04926,ko04931,ko04932,ko04933,ko05030,ko05120,ko05131,ko05132,ko05133,ko05134,ko05140,ko05142,ko05145,ko05146,ko05152,ko05160,ko05161,ko05162,ko05164,ko05165,ko05166,ko05167,ko05168…	M00686	-	-	ko00000,ko00001,ko00002,ko03000	-	-	-	Ank_2,Ank_4,Death,RHD_DNA_bind,RHD_dimer
LEUER_T0000424	nfkb1	176946.XP_007429861.1	3.51e-131	405.0	COG0666@1|root,KOG0504@2759|Eukaryota,38EM0@33154|Opisthokonta,3BACK@33208|Metazoa,3CUN1@33213|Bilateria,4827G@7711|Chordata,491P6@7742|Vertebrata	33208|Metazoa	K	Nuclear factor of kappa light polypeptide gene enhancer in B-cells 1	NFKB1	GO:0000122,GO:0000165,GO:0000228,GO:0000785,GO:0000790,GO:0000791,GO:0000902,GO:0000904,GO:0000976,GO:0000977,GO:0000980,GO:0000981,GO:0000982,GO:0001012,GO:0001067,GO:0001077,GO:0001158,GO:0001205,GO:0001227,GO:0001228,GO:0001505,GO:0001775,GO:0001817,GO:0001818,GO:0001819,GO:0002218,GO:0002220,GO:0002223,GO:0002225,GO:0002230,GO:0002237,GO:0002252,GO:0002253,GO:0002263,GO:0002274,GO:0002275,GO:…	-	ko:K02580,ko:K04469	ko01523,ko04010,ko04014,ko04024,ko04062,ko04064,ko04066,ko04071,ko04151,ko04210,ko04211,ko04218,ko04380,ko04620,ko04621,ko04622,ko04623,ko04624,ko04657,ko04658,ko04659,ko04660,ko04662,ko04668,ko04722,ko04917,ko04920,ko04926,ko04931,ko04932,ko04933,ko05030,ko05120,ko05131,ko05132,ko05133,ko05134,ko05140,ko05142,ko05145,ko05146,ko05152,ko05160,ko05161,ko05162,ko05164,ko05165,ko05166,ko05167,ko05168…	M00686	-	-	ko00000,ko00001,ko00002,ko03000	-	-	-	Ank_2,Ank_4,Death,RHD_DNA_bind,RHD_dimer
LEUER_T0000425	nfkb1	176946.XP_007429861.1	3.51e-131	405.0	COG0666@1|root,KOG0504@2759|Eukaryota,38EM0@33154|Opisthokonta,3BACK@33208|Metazoa,3CUN1@33213|Bilateria,4827G@7711|Chordata,491P6@7742|Vertebrata	33208|Metazoa	K	Nuclear factor of kappa light polypeptide gene enhancer in B-cells 1	NFKB1	GO:0000122,GO:0000165,GO:0000228,GO:0000785,GO:0000790,GO:0000791,GO:0000902,GO:0000904,GO:0000976,GO:0000977,GO:0000980,GO:0000981,GO:0000982,GO:0001012,GO:0001067,GO:0001077,GO:0001158,GO:0001205,GO:0001227,GO:0001228,GO:0001505,GO:0001775,GO:0001817,GO:0001818,GO:0001819,GO:0002218,GO:0002220,GO:0002223,GO:0002225,GO:0002230,GO:0002237,GO:0002252,GO:0002253,GO:0002263,GO:0002274,GO:0002275,GO:…	-	ko:K02580,ko:K04469	ko01523,ko04010,ko04014,ko04024,ko04062,ko04064,ko04066,ko04071,ko04151,ko04210,ko04211,ko04218,ko04380,ko04620,ko04621,ko04622,ko04623,ko04624,ko04657,ko04658,ko04659,ko04660,ko04662,ko04668,ko04722,ko04917,ko04920,ko04926,ko04931,ko04932,ko04933,ko05030,ko05120,ko05131,ko05132,ko05133,ko05134,ko05140,ko05142,ko05145,ko05146,ko05152,ko05160,ko05161,ko05162,ko05164,ko05165,ko05166,ko05167,ko05168…	M00686	-	-	ko00000,ko00001,ko00002,ko03000	-	-	-	Ank_2,Ank_4,Death,RHD_DNA_bind,RHD_dimer
LEUER_T0000427	manba	8479.XP_005287916.1	3.82e-277	785.0	COG3250@1|root,KOG2230@2759|Eukaryota,38CZF@33154|Opisthokonta,3BA6B@33208|Metazoa,3CR54@33213|Bilateria,48A6S@7711|Chordata,48ZIE@7742|Vertebrata,4C78S@8459|Testudines	33208|Metazoa	G	Glycosyl hydrolases family 2, TIM barrel domain	MANBA	GO:0000323,GO:0001775,GO:0002252,GO:0002263,GO:0002274,GO:0002275,GO:0002283,GO:0002366,GO:0002376,GO:0002443,GO:0002444,GO:0002446,GO:0003674,GO:0003824,GO:0004553,GO:0004567,GO:0005488,GO:0005537,GO:0005575,GO:0005576,GO:0005615,GO:0005622,GO:0005623,GO:0005737,GO:0005764,GO:0005765,GO:0005766,GO:0005773,GO:0005774,GO:0005775,GO:0005886,GO:0005975,GO:0006464,GO:0006516,GO:0006807,GO:0006810,GO:…	3.2.1.25	ko:K01192	ko00511,ko04142,map00511,map04142	-	-	-	ko00000,ko00001,ko01000	-	-	-	Glyco_hydro_2_C,Glyco_hydro_2_N
LEUER_T0000429	LOC116972577	10042.XP_006970401.1	1.47e-106	306.0	COG5078@1|root,KOG0417@2759|Eukaryota,38B6R@33154|Opisthokonta,3BBRF@33208|Metazoa,3CUBW@33213|Bilateria,481RP@7711|Chordata,48W06@7742|Vertebrata,3JAW2@40674|Mammalia,35BNI@314146|Euarchontoglires,4Q6GY@9989|Rodentia	33208|Metazoa	O	protein K11-linked ubiquitination	UBE2D3	GO:0000122,GO:0000209,GO:0003674,GO:0003824,GO:0004842,GO:0005575,GO:0005622,GO:0005623,GO:0005634,GO:0005654,GO:0005737,GO:0005829,GO:0006355,GO:0006357,GO:0006464,GO:0006508,GO:0006511,GO:0006513,GO:0006605,GO:0006625,GO:0006807,GO:0006810,GO:0006886,GO:0006996,GO:0007031,GO:0007154,GO:0007165,GO:0007166,GO:0007167,GO:0007178,GO:0008104,GO:0008150,GO:0008152,GO:0009056,GO:0009057,GO:0009719,GO:…	2.3.2.23	ko:K06689	ko04013,ko04120,ko04141,ko04624,map04013,map04120,map04141,map04624	-	-	-	ko00000,ko00001,ko01000,ko04121	-	-	-	UQ_con
LEUER_T0000430	LOC116972577	10029.XP_007612006.1	1.55e-95	278.0	COG5078@1|root,KOG0417@2759|Eukaryota,38B6R@33154|Opisthokonta,3BBRF@33208|Metazoa,3CUBW@33213|Bilateria,481RP@7711|Chordata,48W06@7742|Vertebrata,3JAW2@40674|Mammalia,35BNI@314146|Euarchontoglires,4Q6GY@9989|Rodentia	33208|Metazoa	O	protein K11-linked ubiquitination	UBE2D3	GO:0000122,GO:0000209,GO:0003674,GO:0003824,GO:0004842,GO:0005575,GO:0005622,GO:0005623,GO:0005634,GO:0005654,GO:0005737,GO:0005829,GO:0006355,GO:0006357,GO:0006464,GO:0006508,GO:0006511,GO:0006513,GO:0006605,GO:0006625,GO:0006807,GO:0006810,GO:0006886,GO:0006996,GO:0007031,GO:0007154,GO:0007165,GO:0007166,GO:0007167,GO:0007178,GO:0008104,GO:0008150,GO:0008152,GO:0009056,GO:0009057,GO:0009719,GO:…	2.3.2.23	ko:K06689	ko04013,ko04120,ko04141,ko04624,map04013,map04120,map04141,map04624	-	-	-	ko00000,ko00001,ko01000,ko04121	-	-	-	UQ_con
LEUER_T0000431	cisd2	9365.XP_007535966.1	2.84e-80	239.0	KOG3461@1|root,KOG3461@2759|Eukaryota,3A03G@33154|Opisthokonta,3BPBI@33208|Metazoa,3D690@33213|Bilateria,48E4X@7711|Chordata,49AZ0@7742|Vertebrata,3JGEJ@40674|Mammalia	33208|Metazoa	S	multicellular organism aging	CISD2	GO:0000422,GO:0003674,GO:0005488,GO:0005515,GO:0005575,GO:0005622,GO:0005623,GO:0005737,GO:0005739,GO:0005740,GO:0005741,GO:0005783,GO:0005789,GO:0006914,GO:0006996,GO:0007005,GO:0007275,GO:0007568,GO:0008150,GO:0008152,GO:0009056,GO:0009894,GO:0009987,GO:0010259,GO:0010506,GO:0012505,GO:0016020,GO:0016043,GO:0019222,GO:0019867,GO:0022411,GO:0031090,GO:0031323,GO:0031329,GO:0031966,GO:0031967,GO:…	-	-	-	-	-	-	-	-	-	-	MitoNEET_N,zf-CDGSH
LEUER_T0000432	slc9b2	9823.ENSSSCP00000009770	4.89e-32	126.0	COG0025@1|root,KOG3826@2759|Eukaryota,38B6Z@33154|Opisthokonta,3BC52@33208|Metazoa,3CSMF@33213|Bilateria,482P4@7711|Chordata,491QU@7742|Vertebrata,3JC1F@40674|Mammalia,4J07U@91561|Cetartiodactyla	33208|Metazoa	P	Solute carrier family 9	SLC9B2	GO:0002682,GO:0002684,GO:0002761,GO:0002763,GO:0002790,GO:0002791,GO:0003008,GO:0003014,GO:0003096,GO:0003674,GO:0005215,GO:0005451,GO:0005488,GO:0005515,GO:0005575,GO:0005622,GO:0005623,GO:0005737,GO:0005739,GO:0005740,GO:0005743,GO:0005768,GO:0005794,GO:0005886,GO:0005903,GO:0005929,GO:0006810,GO:0006811,GO:0006812,GO:0006813,GO:0006814,GO:0006820,GO:0006821,GO:0006897,GO:0006898,GO:0006928,GO:…	-	-	-	-	-	-	-	-	-	-	Na_H_Exchanger
LEUER_T0000433	bdh2	7897.ENSLACP00000000483	4.03e-146	415.0	COG1028@1|root,KOG0725@2759|Eukaryota,38H5G@33154|Opisthokonta,3BK2E@33208|Metazoa,3D0KA@33213|Bilateria,48BIW@7711|Chordata,493XD@7742|Vertebrata	33208|Metazoa	Q	siderophore biosynthetic process	BDH2	GO:0000166,GO:0002262,GO:0002376,GO:0002520,GO:0003674,GO:0003824,GO:0003858,GO:0005488,GO:0005575,GO:0005622,GO:0005623,GO:0005737,GO:0005829,GO:0006082,GO:0006091,GO:0006518,GO:0006629,GO:0006631,GO:0006635,GO:0006725,GO:0006778,GO:0006807,GO:0007275,GO:0008150,GO:0008152,GO:0009056,GO:0009058,GO:0009059,GO:0009062,GO:0009237,GO:0009888,GO:0009987,GO:0016042,GO:0016054,GO:0016491,GO:0016614,GO:…	1.1.1.30	ko:K00019	ko00072,ko00650,ko01100,map00072,map00650,map01100	M00088	R01361	RC00117	ko00000,ko00001,ko00002,ko01000	-	-	-	adh_short_C2
LEUER_T0000434	bdh2	7897.ENSLACP00000000483	2.08e-145	413.0	COG1028@1|root,KOG0725@2759|Eukaryota,38H5G@33154|Opisthokonta,3BK2E@33208|Metazoa,3D0KA@33213|Bilateria,48BIW@7711|Chordata,493XD@7742|Vertebrata	33208|Metazoa	Q	siderophore biosynthetic process	BDH2	GO:0000166,GO:0002262,GO:0002376,GO:0002520,GO:0003674,GO:0003824,GO:0003858,GO:0005488,GO:0005575,GO:0005622,GO:0005623,GO:0005737,GO:0005829,GO:0006082,GO:0006091,GO:0006518,GO:0006629,GO:0006631,GO:0006635,GO:0006725,GO:0006778,GO:0006807,GO:0007275,GO:0008150,GO:0008152,GO:0009056,GO:0009058,GO:0009059,GO:0009062,GO:0009237,GO:0009888,GO:0009987,GO:0016042,GO:0016054,GO:0016491,GO:0016614,GO:…	1.1.1.30	ko:K00019	ko00072,ko00650,ko01100,map00072,map00650,map01100	M00088	R01361	RC00117	ko00000,ko00001,ko00002,ko01000	-	-	-	adh_short_C2
LEUER_T0000435	bdh2	7897.ENSLACP00000000483	4.03e-146	415.0	COG1028@1|root,KOG0725@2759|Eukaryota,38H5G@33154|Opisthokonta,3BK2E@33208|Metazoa,3D0KA@33213|Bilateria,48BIW@7711|Chordata,493XD@7742|Vertebrata	33208|Metazoa	Q	siderophore biosynthetic process	BDH2	GO:0000166,GO:0002262,GO:0002376,GO:0002520,GO:0003674,GO:0003824,GO:0003858,GO:0005488,GO:0005575,GO:0005622,GO:0005623,GO:0005737,GO:0005829,GO:0006082,GO:0006091,GO:0006518,GO:0006629,GO:0006631,GO:0006635,GO:0006725,GO:0006778,GO:0006807,GO:0007275,GO:0008150,GO:0008152,GO:0009056,GO:0009058,GO:0009059,GO:0009062,GO:0009237,GO:0009888,GO:0009987,GO:0016042,GO:0016054,GO:0016491,GO:0016614,GO:…	1.1.1.30	ko:K00019	ko00072,ko00650,ko01100,map00072,map00650,map01100	M00088	R01361	RC00117	ko00000,ko00001,ko00002,ko01000	-	-	-	adh_short_C2
LEUER_T0000436	nans	9258.ENSOANP00000017638	6.39e-214	595.0	COG2089@1|root,2QR5J@2759|Eukaryota,38GRA@33154|Opisthokonta,3B9DK@33208|Metazoa,3CUPX@33213|Bilateria,48AN0@7711|Chordata,493U0@7742|Vertebrata,3JB13@40674|Mammalia	33208|Metazoa	M	N-acylneuraminate-9-phosphate synthase activity	NANS	GO:0003674,GO:0003824,GO:0005575,GO:0005622,GO:0005623,GO:0005737,GO:0005829,GO:0006055,GO:0006139,GO:0006725,GO:0006793,GO:0006807,GO:0008150,GO:0008152,GO:0008781,GO:0009058,GO:0009225,GO:0009226,GO:0009987,GO:0016740,GO:0016765,GO:0016772,GO:0016779,GO:0018130,GO:0019438,GO:0034641,GO:0034654,GO:0044237,GO:0044238,GO:0044249,GO:0044271,GO:0044281,GO:0044424,GO:0044444,GO:0044464,GO:0046381,GO:…	2.5.1.132,2.5.1.56,2.5.1.57	ko:K05304	ko00520,ko01100,map00520,map01100	-	R04435	RC00159	ko00000,ko00001,ko01000	-	-	-	NeuB,SAF
LEUER_T0000438	josd2	9694.XP_007074252.1	8.86e-11	61.6	KOG2934@1|root,KOG2934@2759|Eukaryota,39SVM@33154|Opisthokonta,3BARU@33208|Metazoa,3CWKE@33213|Bilateria,48455@7711|Chordata,493KV@7742|Vertebrata,3JFSP@40674|Mammalia,3EU6P@33554|Carnivora	33208|Metazoa	S	Josephin domain containing 2	JOSD2	GO:0003674,GO:0003824,GO:0004843,GO:0005575,GO:0005622,GO:0005623,GO:0005737,GO:0005829,GO:0006464,GO:0006508,GO:0006807,GO:0008150,GO:0008152,GO:0008233,GO:0008234,GO:0009987,GO:0016579,GO:0016787,GO:0019538,GO:0019783,GO:0036211,GO:0036459,GO:0043170,GO:0043412,GO:0044237,GO:0044238,GO:0044260,GO:0044267,GO:0044424,GO:0044444,GO:0044464,GO:0070011,GO:0070646,GO:0070647,GO:0071704,GO:0101005,GO:…	3.4.19.12	ko:K15235	-	-	-	-	ko00000,ko01000,ko01002,ko04121	-	-	-	Josephin
LEUER_T0000439	josd2	9694.XP_007074252.1	8.86e-11	61.6	KOG2934@1|root,KOG2934@2759|Eukaryota,39SVM@33154|Opisthokonta,3BARU@33208|Metazoa,3CWKE@33213|Bilateria,48455@7711|Chordata,493KV@7742|Vertebrata,3JFSP@40674|Mammalia,3EU6P@33554|Carnivora	33208|Metazoa	S	Josephin domain containing 2	JOSD2	GO:0003674,GO:0003824,GO:0004843,GO:0005575,GO:0005622,GO:0005623,GO:0005737,GO:0005829,GO:0006464,GO:0006508,GO:0006807,GO:0008150,GO:0008152,GO:0008233,GO:0008234,GO:0009987,GO:0016579,GO:0016787,GO:0019538,GO:0019783,GO:0036211,GO:0036459,GO:0043170,GO:0043412,GO:0044237,GO:0044238,GO:0044260,GO:0044267,GO:0044424,GO:0044444,GO:0044464,GO:0070011,GO:0070646,GO:0070647,GO:0071704,GO:0101005,GO:…	3.4.19.12	ko:K15235	-	-	-	-	ko00000,ko01000,ko01002,ko04121	-	-	-	Josephin
LEUER_T0000440	arl9	8496.XP_006270135.1	5.13e-73	228.0	COG1100@1|root,KOG0070@2759|Eukaryota,39WM6@33154|Opisthokonta,3BM3G@33208|Metazoa,3CTN3@33213|Bilateria,485K7@7711|Chordata,498DZ@7742|Vertebrata	33208|Metazoa	U	ADP-ribosylation factor-like	ARL9	-	-	ko:K07957	-	-	-	-	ko00000,ko04031	-	-	-	Arf
LEUER_T0000441	srp72	7918.ENSLOCP00000003124	0.0	959.0	KOG2376@1|root,KOG2376@2759|Eukaryota,38BBP@33154|Opisthokonta,3B94P@33208|Metazoa,3CYSC@33213|Bilateria,4805K@7711|Chordata,49550@7742|Vertebrata,4A0D0@7898|Actinopterygii	33208|Metazoa	U	Signal recognition particle	SRP72	GO:0003674,GO:0003676,GO:0003723,GO:0005047,GO:0005488,GO:0005515,GO:0005575,GO:0005622,GO:0005623,GO:0005737,GO:0005783,GO:0005786,GO:0005829,GO:0006403,GO:0006605,GO:0006612,GO:0006613,GO:0006614,GO:0006616,GO:0006810,GO:0006886,GO:0008104,GO:0008150,GO:0008312,GO:0012505,GO:0015031,GO:0015833,GO:0015931,GO:0019904,GO:0030911,GO:0032991,GO:0033036,GO:0033227,GO:0033365,GO:0034613,GO:0042221,GO:…	-	ko:K03108	ko03060,map03060	-	-	-	ko00000,ko00001,ko02044	3.A.5.9	-	-	SRP72,SRP_TPR_like,TPR_6,TPR_8
LEUER_T0000442	smim19	215358.XP_010745752.1	9.04e-42	140.0	2CEHI@1|root,2S18T@2759|Eukaryota,3A3RJ@33154|Opisthokonta,3BRPS@33208|Metazoa,3D77Q@33213|Bilateria,48EKN@7711|Chordata,49BGD@7742|Vertebrata,4A404@7898|Actinopterygii	33208|Metazoa	S	Small integral membrane protein	SMIM19	-	-	-	-	-	-	-	-	-	-	-	UPF0697
LEUER_T0000443	LOC116972792	7897.ENSLACP00000003452	1.12e-111	327.0	COG2128@1|root,2QRWD@2759|Eukaryota,39SGE@33154|Opisthokonta,3BC4A@33208|Metazoa,3D2JI@33213|Bilateria,485R9@7711|Chordata,493A7@7742|Vertebrata	33208|Metazoa	S	Carboxymuconolactone decarboxylase family	-	-	-	-	-	-	-	-	-	-	-	-	CMD
LEUER_T0000444	LOC116972792	7897.ENSLACP00000003452	4.21e-111	326.0	COG2128@1|root,2QRWD@2759|Eukaryota,39SGE@33154|Opisthokonta,3BC4A@33208|Metazoa,3D2JI@33213|Bilateria,485R9@7711|Chordata,493A7@7742|Vertebrata	33208|Metazoa	S	Carboxymuconolactone decarboxylase family	-	-	-	-	-	-	-	-	-	-	-	-	CMD
LEUER_T0000445	dcaf10	181119.XP_005529523.1	8.09e-253	703.0	KOG0264@1|root,KOG4155@1|root,KOG0264@2759|Eukaryota,KOG4155@2759|Eukaryota,38BFY@33154|Opisthokonta,3BEWB@33208|Metazoa,3D1Q8@33213|Bilateria,481SH@7711|Chordata,494TV@7742|Vertebrata,4GT38@8782|Aves	33208|Metazoa	B	DDB1- and CUL4-associated factor 10	DCAF10	GO:0000151,GO:0005575,GO:0005622,GO:0005623,GO:0005634,GO:0005654,GO:0006464,GO:0006807,GO:0008150,GO:0008152,GO:0009987,GO:0019538,GO:0031461,GO:0031974,GO:0031981,GO:0032991,GO:0036211,GO:0043170,GO:0043226,GO:0043227,GO:0043229,GO:0043231,GO:0043233,GO:0043412,GO:0043687,GO:0044237,GO:0044238,GO:0044260,GO:0044267,GO:0044422,GO:0044424,GO:0044428,GO:0044446,GO:0044464,GO:0070013,GO:0071704,GO:…	-	ko:K11802	-	-	-	-	ko00000,ko04121	-	-	-	WD40
LEUER_T0000448	slc49a3	7918.ENSLOCP00000011733	3.55e-202	575.0	KOG2563@1|root,KOG2563@2759|Eukaryota,38GTZ@33154|Opisthokonta,3BE2U@33208|Metazoa,3D0QQ@33213|Bilateria,48926@7711|Chordata,48VK6@7742|Vertebrata,4A1IG@7898|Actinopterygii	33208|Metazoa	S	Major facilitator superfamily	MFSD7	-	-	ko:K08220,ko:K12306	-	-	-	-	ko00000,ko02000	2.A.1.28.1,2.A.1.28.2,2.A.1.28.4	-	-	MFS_1
LEUER_T0000449	pcgf3	27679.XP_010343457.1	1.13e-161	454.0	KOG2660@1|root,KOG2660@2759|Eukaryota,38YEB@33154|Opisthokonta,3BCH0@33208|Metazoa,3CR8J@33213|Bilateria,485WG@7711|Chordata,493C5@7742|Vertebrata,3JF3R@40674|Mammalia,35IKW@314146|Euarchontoglires,4MH6H@9443|Primates	33208|Metazoa	O	Polycomb group ring finger	PCGF3	GO:0000003,GO:0001558,GO:0003006,GO:0003674,GO:0005488,GO:0005575,GO:0005622,GO:0005623,GO:0005634,GO:0005654,GO:0005730,GO:0006139,GO:0006325,GO:0006349,GO:0006464,GO:0006513,GO:0006725,GO:0006807,GO:0006996,GO:0007275,GO:0007399,GO:0007548,GO:0007549,GO:0008150,GO:0008152,GO:0008270,GO:0008361,GO:0009048,GO:0009653,GO:0009987,GO:0010390,GO:0010468,GO:0010769,GO:0010975,GO:0016043,GO:0016567,GO:…	-	ko:K11488,ko:K14404	ko03015,ko04550,ko05164,map03015,map04550,map05164	-	-	-	ko00000,ko00001,ko03019,ko03021,ko03036	-	-	-	RAWUL,zf-C3HC4_2
LEUER_T0000450	cplx1	8364.ENSXETP00000015554	1.05e-65	202.0	2CF74@1|root,2S3I2@2759|Eukaryota,3A4TU@33154|Opisthokonta,3BPCM@33208|Metazoa,3D6KC@33213|Bilateria,48E45@7711|Chordata,49AYW@7742|Vertebrata	33208|Metazoa	S	syntaxin-1 binding	CPLX1	GO:0000149,GO:0001505,GO:0002790,GO:0003674,GO:0005215,GO:0005326,GO:0005488,GO:0005515,GO:0005575,GO:0005622,GO:0005623,GO:0005737,GO:0005829,GO:0006810,GO:0006836,GO:0006887,GO:0007154,GO:0007267,GO:0007268,GO:0007269,GO:0007274,GO:0007275,GO:0007399,GO:0007416,GO:0007528,GO:0008104,GO:0008150,GO:0009306,GO:0009914,GO:0009987,GO:0010646,GO:0010648,GO:0010817,GO:0015031,GO:0015833,GO:0016020,GO:…	-	ko:K15294	ko04721,map04721	-	-	-	ko00000,ko00001,ko04131	-	-	-	Synaphin
LEUER_T0000452	gne	9371.XP_004711077.1	6.48e-157	461.0	COG1940@1|root,2QUGI@2759|Eukaryota,38S4V@33154|Opisthokonta,3BCQP@33208|Metazoa,3CSF1@33213|Bilateria,488ED@7711|Chordata,495ZK@7742|Vertebrata,3J2QW@40674|Mammalia,352A3@311790|Afrotheria	33208|Metazoa	T	UDP-N-acetylglucosamine 2-epimerase	GNE	GO:0003674,GO:0003824,GO:0005575,GO:0005622,GO:0005623,GO:0005737,GO:0005829,GO:0005975,GO:0006040,GO:0006054,GO:0006082,GO:0006793,GO:0006796,GO:0007155,GO:0008150,GO:0008152,GO:0008761,GO:0009058,GO:0009384,GO:0009987,GO:0016053,GO:0016301,GO:0016310,GO:0016740,GO:0016772,GO:0016773,GO:0016853,GO:0016854,GO:0016857,GO:0016999,GO:0017000,GO:0017144,GO:0019200,GO:0019752,GO:0022610,GO:0043436,GO:…	2.7.1.60,3.2.1.183	ko:K12409	ko00520,ko01100,map00520,map01100	-	R00414,R02705	RC00002,RC00005,RC00017,RC00288	ko00000,ko00001,ko01000	-	-	-	Epimerase_2,ROK
LEUER_T0000453	gne	9371.XP_004711077.1	6.48e-157	461.0	COG1940@1|root,2QUGI@2759|Eukaryota,38S4V@33154|Opisthokonta,3BCQP@33208|Metazoa,3CSF1@33213|Bilateria,488ED@7711|Chordata,495ZK@7742|Vertebrata,3J2QW@40674|Mammalia,352A3@311790|Afrotheria	33208|Metazoa	T	UDP-N-acetylglucosamine 2-epimerase	GNE	GO:0003674,GO:0003824,GO:0005575,GO:0005622,GO:0005623,GO:0005737,GO:0005829,GO:0005975,GO:0006040,GO:0006054,GO:0006082,GO:0006793,GO:0006796,GO:0007155,GO:0008150,GO:0008152,GO:0008761,GO:0009058,GO:0009384,GO:0009987,GO:0016053,GO:0016301,GO:0016310,GO:0016740,GO:0016772,GO:0016773,GO:0016853,GO:0016854,GO:0016857,GO:0016999,GO:0017000,GO:0017144,GO:0019200,GO:0019752,GO:0022610,GO:0043436,GO:…	2.7.1.60,3.2.1.183	ko:K12409	ko00520,ko01100,map00520,map01100	-	R00414,R02705	RC00002,RC00005,RC00017,RC00288	ko00000,ko00001,ko01000	-	-	-	Epimerase_2,ROK
LEUER_T0000454	LOC116972912	225400.XP_006758554.1	2.71e-60	196.0	KOG4031@1|root,KOG4031@2759|Eukaryota,38EF8@33154|Opisthokonta,3BIZQ@33208|Metazoa,3CZZ0@33213|Bilateria,481RB@7711|Chordata,490BW@7742|Vertebrata,3J390@40674|Mammalia,4KR5U@9397|Chiroptera	33208|Metazoa	U	Clathrin, light chain	CLTA	GO:0000139,GO:0000323,GO:0002376,GO:0002478,GO:0002495,GO:0002504,GO:0003674,GO:0005198,GO:0005488,GO:0005515,GO:0005575,GO:0005622,GO:0005623,GO:0005737,GO:0005764,GO:0005765,GO:0005768,GO:0005773,GO:0005774,GO:0005794,GO:0005802,GO:0005819,GO:0005829,GO:0005856,GO:0005886,GO:0005905,GO:0005938,GO:0006807,GO:0006810,GO:0006897,GO:0006898,GO:0008021,GO:0008150,GO:0008152,GO:0009056,GO:0009057,GO:…	-	ko:K04644,ko:K04645	ko04142,ko04144,ko04721,ko04961,ko05016,ko05100,map04142,map04144,map04721,map04961,map05016,map05100	-	-	-	ko00000,ko00001,ko04131,ko04147	-	-	-	Clathrin_lg_ch
LEUER_T0000456	LOC116972912	9694.XP_007076661.1	2.68e-47	159.0	KOG4031@1|root,KOG4031@2759|Eukaryota,38EF8@33154|Opisthokonta,3BIZQ@33208|Metazoa,3CZZ0@33213|Bilateria,481RB@7711|Chordata,490BW@7742|Vertebrata,3J390@40674|Mammalia,3EMA5@33554|Carnivora	33208|Metazoa	U	Clathrin, light chain	CLTA	GO:0000139,GO:0000323,GO:0002376,GO:0002478,GO:0002495,GO:0002504,GO:0003674,GO:0005198,GO:0005488,GO:0005515,GO:0005575,GO:0005622,GO:0005623,GO:0005737,GO:0005764,GO:0005765,GO:0005768,GO:0005773,GO:0005774,GO:0005794,GO:0005802,GO:0005819,GO:0005829,GO:0005856,GO:0005886,GO:0005905,GO:0005938,GO:0006807,GO:0006810,GO:0006897,GO:0006898,GO:0008021,GO:0008150,GO:0008152,GO:0009056,GO:0009057,GO:…	-	ko:K04644,ko:K04645	ko04142,ko04144,ko04721,ko04961,ko05016,ko05100,map04142,map04144,map04721,map04961,map05016,map05100	-	-	-	ko00000,ko00001,ko04131,ko04147	-	-	-	Clathrin_lg_ch
LEUER_T0000457	LOC116972912	60711.ENSCSAP00000006912	1.71e-41	145.0	KOG4031@1|root,KOG4031@2759|Eukaryota,38EF8@33154|Opisthokonta,3BIZQ@33208|Metazoa,3CZZ0@33213|Bilateria,481RB@7711|Chordata,490BW@7742|Vertebrata,3J390@40674|Mammalia,35DJZ@314146|Euarchontoglires,4MBKG@9443|Primates,35YNH@314294|Cercopithecoidea	33208|Metazoa	U	Clathrin is the major protein of the polyhedral coat of coated pits and vesicles	CLTA	GO:0000139,GO:0000323,GO:0002376,GO:0002478,GO:0002495,GO:0002504,GO:0003674,GO:0005198,GO:0005488,GO:0005515,GO:0005575,GO:0005622,GO:0005623,GO:0005737,GO:0005764,GO:0005765,GO:0005768,GO:0005773,GO:0005774,GO:0005794,GO:0005802,GO:0005819,GO:0005829,GO:0005856,GO:0005886,GO:0005905,GO:0005938,GO:0006807,GO:0006810,GO:0006897,GO:0006898,GO:0008021,GO:0008150,GO:0008152,GO:0009056,GO:0009057,GO:…	-	ko:K04644,ko:K04645	ko04142,ko04144,ko04721,ko04961,ko05016,ko05100,map04142,map04144,map04721,map04961,map05016,map05100	-	-	-	ko00000,ko00001,ko04131,ko04147	-	-	-	Clathrin_lg_ch
LEUER_T0000455	LOC116972912	7918.ENSLOCP00000013706	7.13e-52	174.0	KOG4031@1|root,KOG4031@2759|Eukaryota,38EF8@33154|Opisthokonta,3BIZQ@33208|Metazoa,3CZZ0@33213|Bilateria,481RB@7711|Chordata,490BW@7742|Vertebrata,4A1IC@7898|Actinopterygii	33208|Metazoa	U	Clathrin is the major protein of the polyhedral coat of coated pits and vesicles	CLTA	GO:0000139,GO:0000323,GO:0002376,GO:0002478,GO:0002495,GO:0002504,GO:0003674,GO:0005198,GO:0005488,GO:0005515,GO:0005575,GO:0005622,GO:0005623,GO:0005737,GO:0005764,GO:0005765,GO:0005768,GO:0005773,GO:0005774,GO:0005794,GO:0005802,GO:0005819,GO:0005829,GO:0005856,GO:0005886,GO:0005905,GO:0005938,GO:0006807,GO:0006810,GO:0006897,GO:0006898,GO:0008021,GO:0008150,GO:0008152,GO:0009056,GO:0009057,GO:…	-	ko:K04644,ko:K04645	ko04142,ko04144,ko04721,ko04961,ko05016,ko05100,map04142,map04144,map04721,map04961,map05016,map05100	-	-	-	ko00000,ko00001,ko04131,ko04147	-	-	-	Clathrin_lg_ch
LEUER_T0000458	naa15	8496.XP_006261776.1	0.0	1440.0	KOG1156@1|root,KOG1156@2759|Eukaryota,38EST@33154|Opisthokonta,3B9UM@33208|Metazoa,3CWE0@33213|Bilateria,48729@7711|Chordata,48Y9B@7742|Vertebrata	33208|Metazoa	B	N-terminal peptidyl-methionine acetylation	NAA15	GO:0003674,GO:0003824,GO:0005488,GO:0005575,GO:0005622,GO:0005623,GO:0005634,GO:0005667,GO:0005737,GO:0005829,GO:0006355,GO:0006464,GO:0006473,GO:0006474,GO:0006807,GO:0008080,GO:0008150,GO:0008152,GO:0009889,GO:0009891,GO:0009893,GO:0009987,GO:0010467,GO:0010468,GO:0010556,GO:0010557,GO:0010604,GO:0010628,GO:0010941,GO:0016407,GO:0016410,GO:0016740,GO:0016746,GO:0016747,GO:0017196,GO:0018193,GO:…	-	ko:K20792	-	-	-	-	ko00000,ko03036	-	-	-	NARP1,TPR_8
LEUER_T0000459	LOC116972967	7918.ENSLOCP00000012919	8.94e-287	796.0	COG2225@1|root,KOG1261@2759|Eukaryota,38GR5@33154|Opisthokonta,3BGP2@33208|Metazoa,3D0YI@33213|Bilateria,48BT1@7711|Chordata,492XM@7742|Vertebrata,49TD7@7898|Actinopterygii	33208|Metazoa	C	Malate synthase	icl-1	GO:0003674,GO:0003824,GO:0004451,GO:0004474,GO:0005975,GO:0006081,GO:0006082,GO:0006097,GO:0007275,GO:0007568,GO:0008150,GO:0008152,GO:0008340,GO:0009987,GO:0010259,GO:0016740,GO:0016746,GO:0016829,GO:0016830,GO:0016833,GO:0019752,GO:0032501,GO:0032502,GO:0032787,GO:0043436,GO:0044237,GO:0044238,GO:0044262,GO:0044281,GO:0046487,GO:0046912,GO:0048856,GO:0071704	2.3.3.9,4.1.3.1	ko:K01637,ko:K01638	ko00620,ko00630,ko01100,ko01110,ko01120,ko01200,map00620,map00630,map01100,map01110,map01120,map01200	M00012	R00472,R00479	RC00004,RC00308,RC00311,RC00313,RC02747	ko00000,ko00001,ko00002,ko01000	-	-	-	ICL,Malate_synthase,PEP_mutase
LEUER_T0000460	rab33b	7918.ENSLOCP00000012906	2.71e-118	343.0	KOG0084@1|root,KOG0084@2759|Eukaryota,391RR@33154|Opisthokonta,3BCZ6@33208|Metazoa,3CW9H@33213|Bilateria,487BW@7711|Chordata,491X8@7742|Vertebrata,49WET@7898|Actinopterygii	33208|Metazoa	U	RAB33B, member RAS oncogene family a	RAB33B	GO:0000045,GO:0000139,GO:0001501,GO:0003674,GO:0003824,GO:0003924,GO:0005575,GO:0005622,GO:0005623,GO:0005737,GO:0005794,GO:0005796,GO:0006810,GO:0006891,GO:0006914,GO:0006996,GO:0007033,GO:0007275,GO:0008104,GO:0008150,GO:0008152,GO:0009056,GO:0009653,GO:0009887,GO:0009894,GO:0009987,GO:0010506,GO:0012505,GO:0016020,GO:0016043,GO:0016192,GO:0016236,GO:0016241,GO:0016462,GO:0016787,GO:0016817,GO:…	-	ko:K07920	ko04140,map04140	-	-	-	ko00000,ko00001,ko04031,ko04131,ko04147	-	-	-	Ras
LEUER_T0000464	LOC116972980	7897.ENSLACP00000015125	2.81e-77	239.0	28NEH@1|root,2QV02@2759|Eukaryota,39Z3X@33154|Opisthokonta,3BGQG@33208|Metazoa,3CTGC@33213|Bilateria,48D02@7711|Chordata,496NT@7742|Vertebrata	33208|Metazoa	S	CD20-like family	-	-	-	-	-	-	-	-	-	-	-	-	CD20
LEUER_T0000461	LOC116972980	7897.ENSLACP00000015125	2.81e-77	239.0	28NEH@1|root,2QV02@2759|Eukaryota,39Z3X@33154|Opisthokonta,3BGQG@33208|Metazoa,3CTGC@33213|Bilateria,48D02@7711|Chordata,496NT@7742|Vertebrata	33208|Metazoa	S	CD20-like family	-	-	-	-	-	-	-	-	-	-	-	-	CD20
LEUER_T0000462	LOC116972980	7897.ENSLACP00000015125	2.81e-77	239.0	28NEH@1|root,2QV02@2759|Eukaryota,39Z3X@33154|Opisthokonta,3BGQG@33208|Metazoa,3CTGC@33213|Bilateria,48D02@7711|Chordata,496NT@7742|Vertebrata	33208|Metazoa	S	CD20-like family	-	-	-	-	-	-	-	-	-	-	-	-	CD20
LEUER_T0000463	LOC116972980	7897.ENSLACP00000015125	2.81e-77	239.0	28NEH@1|root,2QV02@2759|Eukaryota,39Z3X@33154|Opisthokonta,3BGQG@33208|Metazoa,3CTGC@33213|Bilateria,48D02@7711|Chordata,496NT@7742|Vertebrata	33208|Metazoa	S	CD20-like family	-	-	-	-	-	-	-	-	-	-	-	-	CD20
LEUER_T0000465	LOC116972980	7897.ENSLACP00000015125	4.16e-72	225.0	28NEH@1|root,2QV02@2759|Eukaryota,39Z3X@33154|Opisthokonta,3BGQG@33208|Metazoa,3CTGC@33213|Bilateria,48D02@7711|Chordata,496NT@7742|Vertebrata	33208|Metazoa	S	CD20-like family	-	-	-	-	-	-	-	-	-	-	-	-	CD20
LEUER_T0000467	elf2	8479.XP_005284403.1	4.02e-250	707.0	KOG3804@1|root,KOG3804@2759|Eukaryota,39R90@33154|Opisthokonta,3BA8E@33208|Metazoa,3CYFC@33213|Bilateria,48633@7711|Chordata,494P7@7742|Vertebrata,4C7IR@8459|Testudines	33208|Metazoa	K	Transcription factor	ELF2	GO:0000003,GO:0000981,GO:0000982,GO:0001077,GO:0001228,GO:0002165,GO:0002682,GO:0003006,GO:0003674,GO:0003676,GO:0003677,GO:0003700,GO:0005488,GO:0005575,GO:0005622,GO:0005623,GO:0005634,GO:0005654,GO:0005737,GO:0005829,GO:0006139,GO:0006351,GO:0006355,GO:0006357,GO:0006366,GO:0006725,GO:0006807,GO:0006914,GO:0007275,GO:0007276,GO:0007281,GO:0007292,GO:0007431,GO:0007435,GO:0007552,GO:0008150,GO:…	-	ko:K03211,ko:K09428	ko04013,ko04214,ko04320,ko05202,map04013,map04214,map04320,map05202	-	-	-	ko00000,ko00001,ko03000	-	-	-	Elf-1_N,Ets
LEUER_T0000468	elf2	8479.XP_005284403.1	1.67e-251	711.0	KOG3804@1|root,KOG3804@2759|Eukaryota,39R90@33154|Opisthokonta,3BA8E@33208|Metazoa,3CYFC@33213|Bilateria,48633@7711|Chordata,494P7@7742|Vertebrata,4C7IR@8459|Testudines	33208|Metazoa	K	Transcription factor	ELF2	GO:0000003,GO:0000981,GO:0000982,GO:0001077,GO:0001228,GO:0002165,GO:0002682,GO:0003006,GO:0003674,GO:0003676,GO:0003677,GO:0003700,GO:0005488,GO:0005575,GO:0005622,GO:0005623,GO:0005634,GO:0005654,GO:0005737,GO:0005829,GO:0006139,GO:0006351,GO:0006355,GO:0006357,GO:0006366,GO:0006725,GO:0006807,GO:0006914,GO:0007275,GO:0007276,GO:0007281,GO:0007292,GO:0007431,GO:0007435,GO:0007552,GO:0008150,GO:…	-	ko:K03211,ko:K09428	ko04013,ko04214,ko04320,ko05202,map04013,map04214,map04320,map05202	-	-	-	ko00000,ko00001,ko03000	-	-	-	Elf-1_N,Ets
LEUER_T0000469	elf2	9361.ENSDNOP00000034082	1.45e-224	637.0	KOG3804@1|root,KOG3804@2759|Eukaryota,39R90@33154|Opisthokonta,3BA8E@33208|Metazoa,3CYFC@33213|Bilateria,48633@7711|Chordata,494P7@7742|Vertebrata,3J3KV@40674|Mammalia	33208|Metazoa	K	Transcription factor	ELF2	GO:0000003,GO:0000981,GO:0000982,GO:0001077,GO:0001228,GO:0002165,GO:0003006,GO:0003674,GO:0003676,GO:0003677,GO:0003700,GO:0005488,GO:0005575,GO:0005622,GO:0005623,GO:0005634,GO:0005654,GO:0005737,GO:0005829,GO:0006139,GO:0006351,GO:0006355,GO:0006357,GO:0006366,GO:0006725,GO:0006807,GO:0006914,GO:0007275,GO:0007276,GO:0007281,GO:0007292,GO:0007431,GO:0007435,GO:0007552,GO:0008150,GO:0008152,GO:…	-	ko:K03211,ko:K09428	ko04013,ko04214,ko04320,ko05202,map04013,map04214,map04320,map05202	-	-	-	ko00000,ko00001,ko03000	-	-	-	Elf-1_N,Ets
LEUER_T0000470	noct	8496.XP_006261773.1	1.99e-198	558.0	COG5239@1|root,KOG0620@2759|Eukaryota,38G8M@33154|Opisthokonta,3BC44@33208|Metazoa,3CXTU@33213|Bilateria,4825R@7711|Chordata,4972N@7742|Vertebrata	33208|Metazoa	K	CCR4 carbon catabolite repression 4-like (S. cerevisiae)	CCRN4L	GO:0000175,GO:0000288,GO:0000289,GO:0000290,GO:0000932,GO:0000956,GO:0002237,GO:0003674,GO:0003676,GO:0003700,GO:0003723,GO:0003729,GO:0003824,GO:0004518,GO:0004527,GO:0004532,GO:0004535,GO:0004540,GO:0005488,GO:0005575,GO:0005622,GO:0005623,GO:0005634,GO:0005654,GO:0005737,GO:0006139,GO:0006351,GO:0006355,GO:0006366,GO:0006401,GO:0006402,GO:0006725,GO:0006807,GO:0006996,GO:0007610,GO:0007622,GO:…	3.1.13.4	ko:K18764	-	-	-	-	ko00000,ko01000,ko03019	-	-	-	Exo_endo_phos
LEUER_T0000471	slc7a11	13735.ENSPSIP00000007849	4.73e-262	729.0	COG0531@1|root,KOG1287@2759|Eukaryota,38BBK@33154|Opisthokonta,3B9U2@33208|Metazoa,3CYME@33213|Bilateria,488CW@7711|Chordata,4948R@7742|Vertebrata,4C9FD@8459|Testudines	33208|Metazoa	E	Amino acid permease	SLC7A11	GO:0000099,GO:0001775,GO:0002376,GO:0003333,GO:0003674,GO:0005215,GO:0005294,GO:0005310,GO:0005313,GO:0005326,GO:0005342,GO:0005575,GO:0005622,GO:0005623,GO:0005737,GO:0005783,GO:0005791,GO:0005856,GO:0005886,GO:0005887,GO:0006810,GO:0006811,GO:0006820,GO:0006835,GO:0006836,GO:0006855,GO:0006865,GO:0006928,GO:0006950,GO:0007155,GO:0007596,GO:0007599,GO:0008150,GO:0008509,GO:0008514,GO:0009611,GO:…	-	ko:K13869	ko04216,map04216	-	-	-	ko00000,ko00001,ko02000	2.A.3.8.5	-	-	AA_permease_2
LEUER_T0000472	pcdh18	8469.XP_007063789.1	0.0	1470.0	KOG3594@1|root,KOG3594@2759|Eukaryota,38Y6B@33154|Opisthokonta,3BHME@33208|Metazoa,3CVAB@33213|Bilateria,483I2@7711|Chordata,496KD@7742|Vertebrata,4CFKQ@8459|Testudines	33208|Metazoa	S	Cadherin-like	PCDH18	GO:0003674,GO:0005488,GO:0005509,GO:0005575,GO:0005623,GO:0005886,GO:0005887,GO:0007154,GO:0007155,GO:0007156,GO:0007267,GO:0007275,GO:0007399,GO:0007417,GO:0007420,GO:0008150,GO:0009987,GO:0016020,GO:0016021,GO:0016339,GO:0022610,GO:0023052,GO:0031224,GO:0031226,GO:0032501,GO:0032502,GO:0043167,GO:0043169,GO:0044425,GO:0044459,GO:0044464,GO:0046872,GO:0048513,GO:0048731,GO:0048856,GO:0060322,GO:…	-	ko:K16495,ko:K16499	-	-	-	-	ko00000,ko04516	-	-	-	Cadherin,Cadherin_2
LEUER_T0000473	pcdh10	7918.ENSLOCP00000013003	0.0	1424.0	KOG3594@1|root,KOG3594@2759|Eukaryota,39CVK@33154|Opisthokonta,3BARZ@33208|Metazoa,3CU8A@33213|Bilateria,48629@7711|Chordata,48YT4@7742|Vertebrata,49T0T@7898|Actinopterygii	33208|Metazoa	S	Protocadherin 10b	PCDH10	GO:0005575,GO:0005623,GO:0005886,GO:0005887,GO:0007154,GO:0007155,GO:0007267,GO:0007275,GO:0007399,GO:0008150,GO:0009987,GO:0016020,GO:0016021,GO:0022610,GO:0023052,GO:0031224,GO:0031226,GO:0032501,GO:0032502,GO:0044425,GO:0044459,GO:0044464,GO:0048731,GO:0048856,GO:0071944	-	ko:K16499	-	-	-	-	ko00000,ko04516	-	-	-	Cadherin,Cadherin_2,Cadherin_C_2
LEUER_T0000474	pcdh10	7918.ENSLOCP00000013003	0.0	1423.0	KOG3594@1|root,KOG3594@2759|Eukaryota,39CVK@33154|Opisthokonta,3BARZ@33208|Metazoa,3CU8A@33213|Bilateria,48629@7711|Chordata,48YT4@7742|Vertebrata,49T0T@7898|Actinopterygii	33208|Metazoa	S	Protocadherin 10b	PCDH10	GO:0005575,GO:0005623,GO:0005886,GO:0005887,GO:0007154,GO:0007155,GO:0007267,GO:0007275,GO:0007399,GO:0008150,GO:0009987,GO:0016020,GO:0016021,GO:0022610,GO:0023052,GO:0031224,GO:0031226,GO:0032501,GO:0032502,GO:0044425,GO:0044459,GO:0044464,GO:0048731,GO:0048856,GO:0071944	-	ko:K16499	-	-	-	-	ko00000,ko04516	-	-	-	Cadherin,Cadherin_2,Cadherin_C_2
LEUER_T0000475	pcdh10	7918.ENSLOCP00000013003	0.0	1600.0	KOG3594@1|root,KOG3594@2759|Eukaryota,39CVK@33154|Opisthokonta,3BARZ@33208|Metazoa,3CU8A@33213|Bilateria,48629@7711|Chordata,48YT4@7742|Vertebrata,49T0T@7898|Actinopterygii	33208|Metazoa	S	Protocadherin 10b	PCDH10	GO:0005575,GO:0005623,GO:0005886,GO:0005887,GO:0007154,GO:0007155,GO:0007267,GO:0007275,GO:0007399,GO:0008150,GO:0009987,GO:0016020,GO:0016021,GO:0022610,GO:0023052,GO:0031224,GO:0031226,GO:0032501,GO:0032502,GO:0044425,GO:0044459,GO:0044464,GO:0048731,GO:0048856,GO:0071944	-	ko:K16499	-	-	-	-	ko00000,ko04516	-	-	-	Cadherin,Cadherin_2,Cadherin_C_2
LEUER_T0000476	pcdh10	7918.ENSLOCP00000013003	0.0	1610.0	KOG3594@1|root,KOG3594@2759|Eukaryota,39CVK@33154|Opisthokonta,3BARZ@33208|Metazoa,3CU8A@33213|Bilateria,48629@7711|Chordata,48YT4@7742|Vertebrata,49T0T@7898|Actinopterygii	33208|Metazoa	S	Protocadherin 10b	PCDH10	GO:0005575,GO:0005623,GO:0005886,GO:0005887,GO:0007154,GO:0007155,GO:0007267,GO:0007275,GO:0007399,GO:0008150,GO:0009987,GO:0016020,GO:0016021,GO:0022610,GO:0023052,GO:0031224,GO:0031226,GO:0032501,GO:0032502,GO:0044425,GO:0044459,GO:0044464,GO:0048731,GO:0048856,GO:0071944	-	ko:K16499	-	-	-	-	ko00000,ko04516	-	-	-	Cadherin,Cadherin_2,Cadherin_C_2
LEUER_T0000478	c1h4orf33	7897.ENSLACP00000022845	3.11e-97	287.0	28X6N@1|root,2R3ZD@2759|Eukaryota,39VH1@33154|Opisthokonta,3BFR3@33208|Metazoa,3CZUX@33213|Bilateria,482FU@7711|Chordata,493J9@7742|Vertebrata	33208|Metazoa	S	Chromosome 4 open reading frame 33	C4orf33	-	-	-	-	-	-	-	-	-	-	-	-
LEUER_T0000479	c1h4orf33	7897.ENSLACP00000022845	1.73e-97	288.0	28X6N@1|root,2R3ZD@2759|Eukaryota,39VH1@33154|Opisthokonta,3BFR3@33208|Metazoa,3CZUX@33213|Bilateria,482FU@7711|Chordata,493J9@7742|Vertebrata	33208|Metazoa	S	Chromosome 4 open reading frame 33	C4orf33	-	-	-	-	-	-	-	-	-	-	-	-
LEUER_T0000480	sclt1	7897.ENSLACP00000015533	2.14e-230	664.0	28JSI@1|root,2QS6B@2759|Eukaryota,39XA3@33154|Opisthokonta,3BD44@33208|Metazoa,3CT6H@33213|Bilateria,483F2@7711|Chordata,4934J@7742|Vertebrata	33208|Metazoa	S	clustering of voltage-gated sodium channels	SCLT1	GO:0003674,GO:0005488,GO:0005515,GO:0005575,GO:0005622,GO:0005623,GO:0005737,GO:0005813,GO:0005814,GO:0005815,GO:0005829,GO:0005856,GO:0005929,GO:0006996,GO:0007275,GO:0007399,GO:0008022,GO:0008150,GO:0009987,GO:0015630,GO:0016020,GO:0016043,GO:0016247,GO:0017080,GO:0021700,GO:0022008,GO:0022406,GO:0022607,GO:0030030,GO:0030031,GO:0030117,GO:0030118,GO:0030154,GO:0030182,GO:0030276,GO:0032501,GO:…	-	-	-	-	-	-	-	-	-	-	-
LEUER_T0000481	sclt1	7897.ENSLACP00000015533	3.27e-210	612.0	28JSI@1|root,2QS6B@2759|Eukaryota,39XA3@33154|Opisthokonta,3BD44@33208|Metazoa,3CT6H@33213|Bilateria,483F2@7711|Chordata,4934J@7742|Vertebrata	33208|Metazoa	S	clustering of voltage-gated sodium channels	SCLT1	GO:0003674,GO:0005488,GO:0005515,GO:0005575,GO:0005622,GO:0005623,GO:0005737,GO:0005813,GO:0005814,GO:0005815,GO:0005829,GO:0005856,GO:0005929,GO:0006996,GO:0007275,GO:0007399,GO:0008022,GO:0008150,GO:0009987,GO:0015630,GO:0016020,GO:0016043,GO:0016247,GO:0017080,GO:0021700,GO:0022008,GO:0022406,GO:0022607,GO:0030030,GO:0030031,GO:0030117,GO:0030118,GO:0030154,GO:0030182,GO:0030276,GO:0032501,GO:…	-	-	-	-	-	-	-	-	-	-	-
LEUER_T0000482	jade1	7897.ENSLACP00000016147	0.0	1002.0	COG5141@1|root,KOG0954@2759|Eukaryota,38DSU@33154|Opisthokonta,3BBJP@33208|Metazoa,3CUFP@33213|Bilateria,480C6@7711|Chordata,497HR@7742|Vertebrata	33208|Metazoa	S	histone H4-K12 acetylation	JADE1	GO:0000123,GO:0001558,GO:0001654,GO:0001745,GO:0001751,GO:0001754,GO:0003674,GO:0003712,GO:0003713,GO:0005575,GO:0005622,GO:0005623,GO:0005634,GO:0005654,GO:0005737,GO:0005815,GO:0005829,GO:0005856,GO:0005886,GO:0005929,GO:0006325,GO:0006464,GO:0006473,GO:0006475,GO:0006807,GO:0006915,GO:0006996,GO:0007275,GO:0007346,GO:0007399,GO:0007423,GO:0008150,GO:0008152,GO:0008219,GO:0009653,GO:0009887,GO:…	2.3.2.27	ko:K11347,ko:K22155,ko:K22156	-	-	-	-	ko00000,ko01000,ko03036,ko04121	-	-	-	EPL1,PHD_2,zf-HC5HC2H_2
LEUER_T0000484	jade1	7897.ENSLACP00000016147	0.0	914.0	COG5141@1|root,KOG0954@2759|Eukaryota,38DSU@33154|Opisthokonta,3BBJP@33208|Metazoa,3CUFP@33213|Bilateria,480C6@7711|Chordata,497HR@7742|Vertebrata	33208|Metazoa	S	histone H4-K12 acetylation	JADE1	GO:0000123,GO:0001558,GO:0001654,GO:0001745,GO:0001751,GO:0001754,GO:0003674,GO:0003712,GO:0003713,GO:0005575,GO:0005622,GO:0005623,GO:0005634,GO:0005654,GO:0005737,GO:0005815,GO:0005829,GO:0005856,GO:0005886,GO:0005929,GO:0006325,GO:0006464,GO:0006473,GO:0006475,GO:0006807,GO:0006915,GO:0006996,GO:0007275,GO:0007346,GO:0007399,GO:0007423,GO:0008150,GO:0008152,GO:0008219,GO:0009653,GO:0009887,GO:…	2.3.2.27	ko:K11347,ko:K22155,ko:K22156	-	-	-	-	ko00000,ko01000,ko03036,ko04121	-	-	-	EPL1,PHD_2,zf-HC5HC2H_2
LEUER_T0000483	jade1	7897.ENSLACP00000016147	0.0	1002.0	COG5141@1|root,KOG0954@2759|Eukaryota,38DSU@33154|Opisthokonta,3BBJP@33208|Metazoa,3CUFP@33213|Bilateria,480C6@7711|Chordata,497HR@7742|Vertebrata	33208|Metazoa	S	histone H4-K12 acetylation	JADE1	GO:0000123,GO:0001558,GO:0001654,GO:0001745,GO:0001751,GO:0001754,GO:0003674,GO:0003712,GO:0003713,GO:0005575,GO:0005622,GO:0005623,GO:0005634,GO:0005654,GO:0005737,GO:0005815,GO:0005829,GO:0005856,GO:0005886,GO:0005929,GO:0006325,GO:0006464,GO:0006473,GO:0006475,GO:0006807,GO:0006915,GO:0006996,GO:0007275,GO:0007346,GO:0007399,GO:0007423,GO:0008150,GO:0008152,GO:0008219,GO:0009653,GO:0009887,GO:…	2.3.2.27	ko:K11347,ko:K22155,ko:K22156	-	-	-	-	ko00000,ko01000,ko03036,ko04121	-	-	-	EPL1,PHD_2,zf-HC5HC2H_2
LEUER_T0000487	tbc1d14	8932.XP_005498492.1	3.2e-255	715.0	COG5210@1|root,KOG2223@2759|Eukaryota,38BKA@33154|Opisthokonta,3B9KP@33208|Metazoa,3CY7M@33213|Bilateria,48506@7711|Chordata,48ZUK@7742|Vertebrata,4GTGZ@8782|Aves	33208|Metazoa	T	TBC1 domain family member 14	TBC1D14	GO:0003674,GO:0005096,GO:0005488,GO:0005515,GO:0005575,GO:0005622,GO:0005623,GO:0005634,GO:0005654,GO:0005737,GO:0005768,GO:0005773,GO:0005776,GO:0005794,GO:0006810,GO:0006886,GO:0008047,GO:0008104,GO:0008150,GO:0009892,GO:0009894,GO:0009895,GO:0010506,GO:0010507,GO:0012505,GO:0015031,GO:0015833,GO:0016192,GO:0016197,GO:0016241,GO:0016482,GO:0017016,GO:0017137,GO:0019222,GO:0019899,GO:0019900,GO:…	-	ko:K20167	-	-	-	-	ko00000,ko04131	-	-	-	RabGAP-TBC
LEUER_T0000486	tbc1d14	61853.ENSNLEP00000014361	2.07e-258	724.0	COG5210@1|root,KOG2223@2759|Eukaryota,38BKA@33154|Opisthokonta,3B9KP@33208|Metazoa,3CY7M@33213|Bilateria,48506@7711|Chordata,48ZUK@7742|Vertebrata,3JFCQ@40674|Mammalia,35N92@314146|Euarchontoglires,4MFK7@9443|Primates	33208|Metazoa	T	Rab-GTPase-TBC domain	TBC1D14	GO:0003674,GO:0005096,GO:0005488,GO:0005515,GO:0005575,GO:0005622,GO:0005623,GO:0005634,GO:0005654,GO:0005737,GO:0005768,GO:0005773,GO:0005776,GO:0005794,GO:0006810,GO:0006886,GO:0008047,GO:0008104,GO:0008150,GO:0009892,GO:0009894,GO:0009895,GO:0010506,GO:0010507,GO:0012505,GO:0015031,GO:0015833,GO:0016192,GO:0016197,GO:0016241,GO:0016482,GO:0017016,GO:0017137,GO:0019222,GO:0019899,GO:0019900,GO:…	-	ko:K20167	-	-	-	-	ko00000,ko04131	-	-	-	RabGAP-TBC
LEUER_T0000490	kiaa0232	7897.ENSLACP00000003867	0.0	1672.0	2BZN1@1|root,2QQF7@2759|Eukaryota,38GQ5@33154|Opisthokonta,3BAP8@33208|Metazoa,3CTYJ@33213|Bilateria,4826I@7711|Chordata,48VVF@7742|Vertebrata	33208|Metazoa	S	ATP binding	KIAA0232	-	-	-	-	-	-	-	-	-	-	-	DUF4603
LEUER_T0000488	kiaa0232	7897.ENSLACP00000003867	0.0	1668.0	2BZN1@1|root,2QQF7@2759|Eukaryota,38GQ5@33154|Opisthokonta,3BAP8@33208|Metazoa,3CTYJ@33213|Bilateria,4826I@7711|Chordata,48VVF@7742|Vertebrata	33208|Metazoa	S	ATP binding	KIAA0232	-	-	-	-	-	-	-	-	-	-	-	DUF4603
LEUER_T0000489	kiaa0232	7897.ENSLACP00000003867	0.0	1668.0	2BZN1@1|root,2QQF7@2759|Eukaryota,38GQ5@33154|Opisthokonta,3BAP8@33208|Metazoa,3CTYJ@33213|Bilateria,4826I@7711|Chordata,48VVF@7742|Vertebrata	33208|Metazoa	S	ATP binding	KIAA0232	-	-	-	-	-	-	-	-	-	-	-	DUF4603
LEUER_T0000491	kiaa0232	7897.ENSLACP00000003867	0.0	1617.0	2BZN1@1|root,2QQF7@2759|Eukaryota,38GQ5@33154|Opisthokonta,3BAP8@33208|Metazoa,3CTYJ@33213|Bilateria,4826I@7711|Chordata,48VVF@7742|Vertebrata	33208|Metazoa	S	ATP binding	KIAA0232	-	-	-	-	-	-	-	-	-	-	-	DUF4603
LEUER_T0000492	LOC116973155	7897.ENSLACP00000021601	6.64e-159	457.0	COG5277@1|root,KOG0676@2759|Eukaryota,38FH3@33154|Opisthokonta,3BID7@33208|Metazoa,3D38N@33213|Bilateria,48DGQ@7711|Chordata,498WG@7742|Vertebrata	33208|Metazoa	Z	Actin	ACTRT2	-	-	ko:K05692,ko:K12313	ko04015,ko04145,ko04210,ko04270,ko04371,ko04390,ko04391,ko04510,ko04520,ko04530,ko04611,ko04670,ko04714,ko04745,ko04810,ko04919,ko04921,ko04926,ko05100,ko05110,ko05130,ko05131,ko05132,ko05164,ko05205,ko05225,ko05410,ko05412,ko05414,ko05416,ko05418,map04015,map04145,map04210,map04270,map04371,map04390,map04391,map04510,map04520,map04530,map04611,map04670,map04714,map04745,map04810,map04919,map0492…	-	-	-	ko00000,ko00001,ko03019,ko03021,ko03029,ko03036,ko04147,ko04812	-	-	-	Actin
LEUER_T0000494	man2b2	7918.ENSLOCP00000012412	0.0	1323.0	KOG1959@1|root,KOG1959@2759|Eukaryota,38G6B@33154|Opisthokonta,3BIVP@33208|Metazoa,3D0P4@33213|Bilateria,4873T@7711|Chordata,48VP1@7742|Vertebrata,49Y8E@7898|Actinopterygii	33208|Metazoa	G	Mannosidase alpha class 2B member 2	MAN2B2	GO:0000323,GO:0003674,GO:0003824,GO:0004553,GO:0004559,GO:0005575,GO:0005576,GO:0005622,GO:0005623,GO:0005737,GO:0005764,GO:0005773,GO:0005775,GO:0005975,GO:0005996,GO:0006013,GO:0006464,GO:0006517,GO:0006807,GO:0008150,GO:0008152,GO:0008496,GO:0009056,GO:0009100,GO:0009311,GO:0009313,GO:0009987,GO:0015923,GO:0016052,GO:0016787,GO:0016798,GO:0019318,GO:0019538,GO:0031974,GO:0036211,GO:0043170,GO:…	3.2.1.24	ko:K12312	ko00511,map00511	-	R08717,R08718	-	ko00000,ko00001,ko01000	-	GH38	-	Alpha-mann_mid,Glyco_hydro_38,Glyco_hydro_38C
LEUER_T0000495	ppp2r2c	13735.ENSPSIP00000008720	4.18e-299	819.0	COG5170@1|root,KOG1354@2759|Eukaryota,38CMI@33154|Opisthokonta,3BFSI@33208|Metazoa,3CWYY@33213|Bilateria,47ZBG@7711|Chordata,48ZA8@7742|Vertebrata,4CC1C@8459|Testudines	33208|Metazoa	T	regulatory subunit	PPP2R2C	GO:0000159,GO:0000278,GO:0003674,GO:0005575,GO:0005622,GO:0005623,GO:0005737,GO:0005829,GO:0006464,GO:0006470,GO:0006793,GO:0006796,GO:0006807,GO:0007049,GO:0008150,GO:0008152,GO:0008287,GO:0009987,GO:0010921,GO:0016311,GO:0019208,GO:0019220,GO:0019222,GO:0019538,GO:0019888,GO:0030234,GO:0031323,GO:0031399,GO:0032268,GO:0032502,GO:0032991,GO:0035303,GO:0035304,GO:0036211,GO:0043170,GO:0043412,GO:…	-	ko:K04354	ko03015,ko04071,ko04111,ko04151,ko04152,ko04261,ko04390,ko04391,ko04530,ko04728,ko05142,ko05160,ko05165,map03015,map04071,map04111,map04151,map04152,map04261,map04390,map04391,map04530,map04728,map05142,map05160,map05165	-	-	-	ko00000,ko00001,ko01009,ko03036	-	-	-	-
LEUER_T0000496	ppp2r2c	7918.ENSLOCP00000012400	1.48e-294	807.0	COG5170@1|root,KOG1354@2759|Eukaryota,38CMI@33154|Opisthokonta,3BFSI@33208|Metazoa,3CWYY@33213|Bilateria,47ZBG@7711|Chordata,48ZA8@7742|Vertebrata,49UKH@7898|Actinopterygii	33208|Metazoa	T	Protein phosphatase 2, regulatory subunit B, gamma	PPP2R2C	GO:0000159,GO:0000278,GO:0003674,GO:0005575,GO:0005622,GO:0005623,GO:0005737,GO:0005829,GO:0006464,GO:0006470,GO:0006793,GO:0006796,GO:0006807,GO:0007049,GO:0008150,GO:0008152,GO:0008287,GO:0009987,GO:0010921,GO:0016311,GO:0019208,GO:0019220,GO:0019222,GO:0019538,GO:0019888,GO:0030234,GO:0031323,GO:0031399,GO:0032268,GO:0032502,GO:0032991,GO:0035303,GO:0035304,GO:0036211,GO:0043170,GO:0043412,GO:…	-	ko:K04354	ko03015,ko04071,ko04111,ko04151,ko04152,ko04261,ko04390,ko04391,ko04530,ko04728,ko05142,ko05160,ko05165,map03015,map04071,map04111,map04151,map04152,map04261,map04390,map04391,map04530,map04728,map05142,map05160,map05165	-	-	-	ko00000,ko00001,ko01009,ko03036	-	-	-	-
LEUER_T0000497	ppp2r2c	7918.ENSLOCP00000012400	1.87e-292	804.0	COG5170@1|root,KOG1354@2759|Eukaryota,38CMI@33154|Opisthokonta,3BFSI@33208|Metazoa,3CWYY@33213|Bilateria,47ZBG@7711|Chordata,48ZA8@7742|Vertebrata,49UKH@7898|Actinopterygii	33208|Metazoa	T	Protein phosphatase 2, regulatory subunit B, gamma	PPP2R2C	GO:0000159,GO:0000278,GO:0003674,GO:0005575,GO:0005622,GO:0005623,GO:0005737,GO:0005829,GO:0006464,GO:0006470,GO:0006793,GO:0006796,GO:0006807,GO:0007049,GO:0008150,GO:0008152,GO:0008287,GO:0009987,GO:0010921,GO:0016311,GO:0019208,GO:0019220,GO:0019222,GO:0019538,GO:0019888,GO:0030234,GO:0031323,GO:0031399,GO:0032268,GO:0032502,GO:0032991,GO:0035303,GO:0035304,GO:0036211,GO:0043170,GO:0043412,GO:…	-	ko:K04354	ko03015,ko04071,ko04111,ko04151,ko04152,ko04261,ko04390,ko04391,ko04530,ko04728,ko05142,ko05160,ko05165,map03015,map04071,map04111,map04151,map04152,map04261,map04390,map04391,map04530,map04728,map05142,map05160,map05165	-	-	-	ko00000,ko00001,ko01009,ko03036	-	-	-	-
LEUER_T0000498	ppp2r2c	7897.ENSLACP00000013941	8.61e-308	840.0	COG5170@1|root,KOG1354@2759|Eukaryota,38CMI@33154|Opisthokonta,3BFSI@33208|Metazoa,3CWYY@33213|Bilateria,47ZBG@7711|Chordata,48ZA8@7742|Vertebrata	33208|Metazoa	T	peptidyl-serine dephosphorylation	PPP2R2C	GO:0000159,GO:0000278,GO:0003674,GO:0005575,GO:0005622,GO:0005623,GO:0005737,GO:0005829,GO:0006464,GO:0006470,GO:0006793,GO:0006796,GO:0006807,GO:0007049,GO:0008150,GO:0008152,GO:0008287,GO:0009987,GO:0010921,GO:0016311,GO:0019208,GO:0019220,GO:0019222,GO:0019538,GO:0019888,GO:0030234,GO:0031323,GO:0031399,GO:0032268,GO:0032502,GO:0032991,GO:0035303,GO:0035304,GO:0036211,GO:0043170,GO:0043412,GO:…	-	ko:K04354	ko03015,ko04071,ko04111,ko04151,ko04152,ko04261,ko04390,ko04391,ko04530,ko04728,ko05142,ko05160,ko05165,map03015,map04071,map04111,map04151,map04152,map04261,map04390,map04391,map04530,map04728,map05142,map05160,map05165	-	-	-	ko00000,ko00001,ko01009,ko03036	-	-	-	-
LEUER_T0000499	ppp2r2c	7897.ENSLACP00000013941	8.61e-308	840.0	COG5170@1|root,KOG1354@2759|Eukaryota,38CMI@33154|Opisthokonta,3BFSI@33208|Metazoa,3CWYY@33213|Bilateria,47ZBG@7711|Chordata,48ZA8@7742|Vertebrata	33208|Metazoa	T	peptidyl-serine dephosphorylation	PPP2R2C	GO:0000159,GO:0000278,GO:0003674,GO:0005575,GO:0005622,GO:0005623,GO:0005737,GO:0005829,GO:0006464,GO:0006470,GO:0006793,GO:0006796,GO:0006807,GO:0007049,GO:0008150,GO:0008152,GO:0008287,GO:0009987,GO:0010921,GO:0016311,GO:0019208,GO:0019220,GO:0019222,GO:0019538,GO:0019888,GO:0030234,GO:0031323,GO:0031399,GO:0032268,GO:0032502,GO:0032991,GO:0035303,GO:0035304,GO:0036211,GO:0043170,GO:0043412,GO:…	-	ko:K04354	ko03015,ko04071,ko04111,ko04151,ko04152,ko04261,ko04390,ko04391,ko04530,ko04728,ko05142,ko05160,ko05165,map03015,map04071,map04111,map04151,map04152,map04261,map04390,map04391,map04530,map04728,map05142,map05160,map05165	-	-	-	ko00000,ko00001,ko01009,ko03036	-	-	-	-
LEUER_T0000500	wfs1	52644.XP_010581782.1	0.0	1152.0	28JXR@1|root,2QSC1@2759|Eukaryota,39BF5@33154|Opisthokonta,3BBXR@33208|Metazoa,3CX7M@33213|Bilateria,487DF@7711|Chordata,48WJY@7742|Vertebrata,4GM62@8782|Aves	33208|Metazoa	S	Wolframin ER transmembrane glycoprotein	WFS1	GO:0000122,GO:0000302,GO:0001306,GO:0001655,GO:0001822,GO:0003008,GO:0003014,GO:0003091,GO:0003674,GO:0005488,GO:0005515,GO:0005516,GO:0005575,GO:0005622,GO:0005623,GO:0005737,GO:0005783,GO:0005788,GO:0005789,GO:0006355,GO:0006357,GO:0006457,GO:0006464,GO:0006508,GO:0006511,GO:0006807,GO:0006873,GO:0006874,GO:0006875,GO:0006950,GO:0006979,GO:0006983,GO:0006984,GO:0006986,GO:0007154,GO:0007165,GO:…	-	ko:K14020	ko04141,map04141	-	-	-	ko00000,ko00001	-	-	-	-
LEUER_T0000501	wfs1	52644.XP_010581782.1	0.0	1078.0	28JXR@1|root,2QSC1@2759|Eukaryota,39BF5@33154|Opisthokonta,3BBXR@33208|Metazoa,3CX7M@33213|Bilateria,487DF@7711|Chordata,48WJY@7742|Vertebrata,4GM62@8782|Aves	33208|Metazoa	S	Wolframin ER transmembrane glycoprotein	WFS1	GO:0000122,GO:0000302,GO:0001306,GO:0001655,GO:0001822,GO:0003008,GO:0003014,GO:0003091,GO:0003674,GO:0005488,GO:0005515,GO:0005516,GO:0005575,GO:0005622,GO:0005623,GO:0005737,GO:0005783,GO:0005788,GO:0005789,GO:0006355,GO:0006357,GO:0006457,GO:0006464,GO:0006508,GO:0006511,GO:0006807,GO:0006873,GO:0006874,GO:0006875,GO:0006950,GO:0006979,GO:0006983,GO:0006984,GO:0006986,GO:0007154,GO:0007165,GO:…	-	ko:K14020	ko04141,map04141	-	-	-	ko00000,ko00001	-	-	-	-
LEUER_T0000502	LOC116973201	7897.ENSLACP00000012154	6.68e-135	400.0	COG5648@1|root,KOG0381@2759|Eukaryota,39ZGV@33154|Opisthokonta,3BGNK@33208|Metazoa,3CX5Q@33213|Bilateria,48CC7@7711|Chordata,4950R@7742|Vertebrata	33208|Metazoa	K	high mobility group	-	-	-	-	-	-	-	-	-	-	-	-	HMG_box
LEUER_T0000503	LOC116973201	7897.ENSLACP00000012154	6.45e-135	400.0	COG5648@1|root,KOG0381@2759|Eukaryota,39ZGV@33154|Opisthokonta,3BGNK@33208|Metazoa,3CX5Q@33213|Bilateria,48CC7@7711|Chordata,4950R@7742|Vertebrata	33208|Metazoa	K	high mobility group	-	-	-	-	-	-	-	-	-	-	-	-	HMG_box
LEUER_T0000504	LOC116973201	7897.ENSLACP00000012154	9.14e-135	400.0	COG5648@1|root,KOG0381@2759|Eukaryota,39ZGV@33154|Opisthokonta,3BGNK@33208|Metazoa,3CX5Q@33213|Bilateria,48CC7@7711|Chordata,4950R@7742|Vertebrata	33208|Metazoa	K	high mobility group	-	-	-	-	-	-	-	-	-	-	-	-	HMG_box
LEUER_T0000505	LOC116973201	7897.ENSLACP00000012154	3.68e-134	399.0	COG5648@1|root,KOG0381@2759|Eukaryota,39ZGV@33154|Opisthokonta,3BGNK@33208|Metazoa,3CX5Q@33213|Bilateria,48CC7@7711|Chordata,4950R@7742|Vertebrata	33208|Metazoa	K	high mobility group	-	-	-	-	-	-	-	-	-	-	-	-	HMG_box
LEUER_T0000506	LOC116973201	7897.ENSLACP00000012154	2.69e-114	347.0	COG5648@1|root,KOG0381@2759|Eukaryota,39ZGV@33154|Opisthokonta,3BGNK@33208|Metazoa,3CX5Q@33213|Bilateria,48CC7@7711|Chordata,4950R@7742|Vertebrata	33208|Metazoa	K	high mobility group	-	-	-	-	-	-	-	-	-	-	-	-	HMG_box
LEUER_T0000507	jakmip1	8496.XP_006271990.1	0.0	963.0	28JEQ@1|root,2QS6X@2759|Eukaryota,38HIS@33154|Opisthokonta,3BCAP@33208|Metazoa,3E6CC@33213|Bilateria,48467@7711|Chordata,48Z7B@7742|Vertebrata	33208|Metazoa	S	positive regulation of cytoplasmic translation	JAKMIP1	GO:0003008,GO:0003674,GO:0003676,GO:0003723,GO:0003729,GO:0005102,GO:0005488,GO:0005515,GO:0005575,GO:0005622,GO:0005623,GO:0005856,GO:0006417,GO:0007275,GO:0007399,GO:0007417,GO:0007420,GO:0008092,GO:0008150,GO:0009889,GO:0009891,GO:0009893,GO:0010468,GO:0010556,GO:0010557,GO:0010604,GO:0010608,GO:0010628,GO:0016020,GO:0019222,GO:0019894,GO:0019898,GO:0021537,GO:0021544,GO:0021756,GO:0030900,GO:…	-	-	-	-	-	-	-	-	-	-	JAKMIP_CC3
LEUER_T0000508	jakmip1	8496.XP_006271990.1	0.0	977.0	28JEQ@1|root,2QS6X@2759|Eukaryota,38HIS@33154|Opisthokonta,3BCAP@33208|Metazoa,3E6CC@33213|Bilateria,48467@7711|Chordata,48Z7B@7742|Vertebrata	33208|Metazoa	S	positive regulation of cytoplasmic translation	JAKMIP1	GO:0003008,GO:0003674,GO:0003676,GO:0003723,GO:0003729,GO:0005102,GO:0005488,GO:0005515,GO:0005575,GO:0005622,GO:0005623,GO:0005856,GO:0006417,GO:0007275,GO:0007399,GO:0007417,GO:0007420,GO:0008092,GO:0008150,GO:0009889,GO:0009891,GO:0009893,GO:0010468,GO:0010556,GO:0010557,GO:0010604,GO:0010608,GO:0010628,GO:0016020,GO:0019222,GO:0019894,GO:0019898,GO:0021537,GO:0021544,GO:0021756,GO:0030900,GO:…	-	-	-	-	-	-	-	-	-	-	JAKMIP_CC3
LEUER_T0000514	crmp1	8469.XP_007062995.1	0.0	1083.0	COG0044@1|root,KOG2584@2759|Eukaryota,38E62@33154|Opisthokonta,3B9YN@33208|Metazoa,3CV8R@33213|Bilateria,481PQ@7711|Chordata,495VI@7742|Vertebrata,4CCS8@8459|Testudines	33208|Metazoa	F	Collapsin response mediator protein 1	CRMP1	GO:0003008,GO:0003674,GO:0003824,GO:0004157,GO:0005488,GO:0005515,GO:0005575,GO:0005622,GO:0005623,GO:0005737,GO:0005813,GO:0005815,GO:0005829,GO:0005856,GO:0006139,GO:0006206,GO:0006207,GO:0006725,GO:0006807,GO:0007154,GO:0007165,GO:0007166,GO:0007264,GO:0007265,GO:0007275,GO:0007399,GO:0007610,GO:0007611,GO:0007613,GO:0008092,GO:0008150,GO:0008152,GO:0008593,GO:0009058,GO:0009112,GO:0009966,GO:…	3.5.2.2	ko:K01464,ko:K07528	ko00240,ko00410,ko00770,ko00983,ko01100,ko04360,map00240,map00410,map00770,map00983,map01100,map04360	M00046	R02269,R03055,R08227	RC00632,RC00680	ko00000,ko00001,ko00002,ko01000,ko04147	-	-	-	Amidohydro_1
LEUER_T0000515	crmp1	8469.XP_007062995.1	0.0	922.0	COG0044@1|root,KOG2584@2759|Eukaryota,38E62@33154|Opisthokonta,3B9YN@33208|Metazoa,3CV8R@33213|Bilateria,481PQ@7711|Chordata,495VI@7742|Vertebrata,4CCS8@8459|Testudines	33208|Metazoa	F	Collapsin response mediator protein 1	CRMP1	GO:0003008,GO:0003674,GO:0003824,GO:0004157,GO:0005488,GO:0005515,GO:0005575,GO:0005622,GO:0005623,GO:0005737,GO:0005813,GO:0005815,GO:0005829,GO:0005856,GO:0006139,GO:0006206,GO:0006207,GO:0006725,GO:0006807,GO:0007154,GO:0007165,GO:0007166,GO:0007264,GO:0007265,GO:0007275,GO:0007399,GO:0007610,GO:0007611,GO:0007613,GO:0008092,GO:0008150,GO:0008152,GO:0008593,GO:0009058,GO:0009112,GO:0009966,GO:…	3.5.2.2	ko:K01464,ko:K07528	ko00240,ko00410,ko00770,ko00983,ko01100,ko04360,map00240,map00410,map00770,map00983,map01100,map04360	M00046	R02269,R03055,R08227	RC00632,RC00680	ko00000,ko00001,ko00002,ko01000,ko04147	-	-	-	Amidohydro_1
LEUER_T0000516	crmp1	8469.XP_007062995.1	0.0	920.0	COG0044@1|root,KOG2584@2759|Eukaryota,38E62@33154|Opisthokonta,3B9YN@33208|Metazoa,3CV8R@33213|Bilateria,481PQ@7711|Chordata,495VI@7742|Vertebrata,4CCS8@8459|Testudines	33208|Metazoa	F	Collapsin response mediator protein 1	CRMP1	GO:0003008,GO:0003674,GO:0003824,GO:0004157,GO:0005488,GO:0005515,GO:0005575,GO:0005622,GO:0005623,GO:0005737,GO:0005813,GO:0005815,GO:0005829,GO:0005856,GO:0006139,GO:0006206,GO:0006207,GO:0006725,GO:0006807,GO:0007154,GO:0007165,GO:0007166,GO:0007264,GO:0007265,GO:0007275,GO:0007399,GO:0007610,GO:0007611,GO:0007613,GO:0008092,GO:0008150,GO:0008152,GO:0008593,GO:0009058,GO:0009112,GO:0009966,GO:…	3.5.2.2	ko:K01464,ko:K07528	ko00240,ko00410,ko00770,ko00983,ko01100,ko04360,map00240,map00410,map00770,map00983,map01100,map04360	M00046	R02269,R03055,R08227	RC00632,RC00680	ko00000,ko00001,ko00002,ko01000,ko04147	-	-	-	Amidohydro_1
LEUER_T0000523	stk32b	7918.ENSLOCP00000012264	1.16e-128	367.0	KOG0598@1|root,KOG0598@2759|Eukaryota,38GE3@33154|Opisthokonta,3BCR1@33208|Metazoa,3CST3@33213|Bilateria,47Z2F@7711|Chordata,4907U@7742|Vertebrata,4A19M@7898|Actinopterygii	33208|Metazoa	T	Serine threonine kinase 32C	STK32B	GO:0003674,GO:0003824,GO:0004672,GO:0004674,GO:0005575,GO:0005622,GO:0005623,GO:0006464,GO:0006468,GO:0006793,GO:0006796,GO:0006807,GO:0007154,GO:0007165,GO:0008150,GO:0008152,GO:0009987,GO:0016301,GO:0016310,GO:0016740,GO:0016772,GO:0016773,GO:0018105,GO:0018193,GO:0018209,GO:0019538,GO:0023052,GO:0035556,GO:0036211,GO:0043170,GO:0043412,GO:0044237,GO:0044238,GO:0044260,GO:0044267,GO:0044464,GO:…	2.7.11.1	ko:K08793	-	-	-	-	ko00000,ko01000,ko01001	-	-	-	Pkinase
LEUER_T0000524	cytl1	7897.ENSLACP00000009536	1.5e-38	134.0	2BXBU@1|root,2S2F0@2759|Eukaryota,3A35P@33154|Opisthokonta,3BQI3@33208|Metazoa,3D7IT@33213|Bilateria,48ERJ@7711|Chordata,49BI9@7742|Vertebrata	33208|Metazoa	S	Cytokine-like protein 1	CYTL1	GO:0003674,GO:0005102,GO:0005488,GO:0005515,GO:0005575,GO:0005576,GO:0005615,GO:0007154,GO:0007165,GO:0008150,GO:0009987,GO:0023052,GO:0044421,GO:0050789,GO:0050794,GO:0050896,GO:0051716,GO:0065007	-	-	-	-	-	-	-	-	-	-	CYTL1
LEUER_T0000526	msx1	7897.ENSLACP00000004473	6.39e-124	361.0	KOG0850@1|root,KOG0492@2759|Eukaryota,3A3M9@33154|Opisthokonta,3BD8S@33208|Metazoa,3CVQY@33213|Bilateria,48196@7711|Chordata,49402@7742|Vertebrata	33208|Metazoa	K	homeobox	MSX1	GO:0000003,GO:0000122,GO:0000902,GO:0000976,GO:0000977,GO:0000981,GO:0000982,GO:0001012,GO:0001067,GO:0001227,GO:0001228,GO:0001501,GO:0001558,GO:0001701,GO:0001709,GO:0001837,GO:0002009,GO:0002039,GO:0002165,GO:0003002,GO:0003006,GO:0003007,GO:0003197,GO:0003198,GO:0003203,GO:0003272,GO:0003674,GO:0003676,GO:0003677,GO:0003690,GO:0003700,GO:0005488,GO:0005515,GO:0005575,GO:0005622,GO:0005623,GO:…	-	ko:K09341	ko05166,map05166	-	-	-	ko00000,ko00001,ko03000	-	-	-	Homeobox
LEUER_T0000527	stx18	7897.ENSLACP00000012565	2.54e-156	448.0	KOG3894@1|root,KOG3894@2759|Eukaryota,38HCA@33154|Opisthokonta,3BGVA@33208|Metazoa,3CTKY@33213|Bilateria,481MC@7711|Chordata,496GQ@7742|Vertebrata	33208|Metazoa	U	positive regulation of ER to Golgi vesicle-mediated transport	STX18	GO:0000149,GO:0003674,GO:0005484,GO:0005488,GO:0005515,GO:0005575,GO:0005622,GO:0005623,GO:0005737,GO:0005783,GO:0005789,GO:0005938,GO:0006810,GO:0006888,GO:0006890,GO:0006996,GO:0007029,GO:0007154,GO:0007267,GO:0007268,GO:0007274,GO:0007528,GO:0008150,GO:0009987,GO:0010256,GO:0010638,GO:0012505,GO:0016020,GO:0016043,GO:0016192,GO:0019904,GO:0023052,GO:0031201,GO:0031594,GO:0031984,GO:0032386,GO:…	-	ko:K08492	ko04130,ko04145,map04130,map04145	-	-	-	ko00000,ko00001,ko04131	-	-	-	Syntaxin-18_N
LEUER_T0000529	nsg1	13735.ENSPSIP00000017880	2.35e-99	291.0	28JWB@1|root,2QSAI@2759|Eukaryota,39TMG@33154|Opisthokonta,3BHW4@33208|Metazoa,3CWW2@33213|Bilateria,483RX@7711|Chordata,49461@7742|Vertebrata,4C8EG@8459|Testudines	33208|Metazoa	S	Neuron-specific protein family member	HGNC:18790	GO:0000139,GO:0000323,GO:0001881,GO:0001919,GO:0001921,GO:0003674,GO:0005102,GO:0005488,GO:0005515,GO:0005575,GO:0005622,GO:0005623,GO:0005634,GO:0005737,GO:0005764,GO:0005768,GO:0005769,GO:0005770,GO:0005773,GO:0005775,GO:0005783,GO:0005794,GO:0005802,GO:0005886,GO:0006807,GO:0006810,GO:0006886,GO:0006915,GO:0007154,GO:0007267,GO:0007268,GO:0008104,GO:0008150,GO:0008152,GO:0008219,GO:0009893,GO:…	-	-	-	-	-	-	-	-	-	-	Calcyon
LEUER_T0000528	nsg1	13735.ENSPSIP00000017880	2.35e-99	291.0	28JWB@1|root,2QSAI@2759|Eukaryota,39TMG@33154|Opisthokonta,3BHW4@33208|Metazoa,3CWW2@33213|Bilateria,483RX@7711|Chordata,49461@7742|Vertebrata,4C8EG@8459|Testudines	33208|Metazoa	S	Neuron-specific protein family member	HGNC:18790	GO:0000139,GO:0000323,GO:0001881,GO:0001919,GO:0001921,GO:0003674,GO:0005102,GO:0005488,GO:0005515,GO:0005575,GO:0005622,GO:0005623,GO:0005634,GO:0005737,GO:0005764,GO:0005768,GO:0005769,GO:0005770,GO:0005773,GO:0005775,GO:0005783,GO:0005794,GO:0005802,GO:0005886,GO:0006807,GO:0006810,GO:0006886,GO:0006915,GO:0007154,GO:0007267,GO:0007268,GO:0008104,GO:0008150,GO:0008152,GO:0008219,GO:0009893,GO:…	-	-	-	-	-	-	-	-	-	-	Calcyon
LEUER_T0000531	pigg	8479.XP_008170885.1	0.0	935.0	COG1524@1|root,KOG2125@2759|Eukaryota,38FH1@33154|Opisthokonta,3BDEU@33208|Metazoa,3CUSQ@33213|Bilateria,4828X@7711|Chordata,490ZN@7742|Vertebrata,4C97Z@8459|Testudines	33208|Metazoa	T	Phosphatidylinositol glycan anchor biosynthesis, class G	PIGG	GO:0003674,GO:0003824,GO:0005575,GO:0005622,GO:0005623,GO:0005737,GO:0005783,GO:0005789,GO:0006464,GO:0006497,GO:0006505,GO:0006506,GO:0006629,GO:0006643,GO:0006644,GO:0006650,GO:0006661,GO:0006664,GO:0006793,GO:0006796,GO:0006807,GO:0008150,GO:0008152,GO:0008610,GO:0008654,GO:0009058,GO:0009059,GO:0009247,GO:0009987,GO:0012505,GO:0016020,GO:0016021,GO:0016254,GO:0016740,GO:0016772,GO:0016780,GO:…	-	ko:K05310	ko00563,map00563	-	R05924	RC00017	ko00000,ko00001,ko01000	-	-	-	Phosphodiest
LEUER_T0000530	pigg	8479.XP_008170885.1	0.0	1256.0	COG1524@1|root,KOG2125@2759|Eukaryota,38FH1@33154|Opisthokonta,3BDEU@33208|Metazoa,3CUSQ@33213|Bilateria,4828X@7711|Chordata,490ZN@7742|Vertebrata,4C97Z@8459|Testudines	33208|Metazoa	T	Phosphatidylinositol glycan anchor biosynthesis, class G	PIGG	GO:0003674,GO:0003824,GO:0005575,GO:0005622,GO:0005623,GO:0005737,GO:0005783,GO:0005789,GO:0006464,GO:0006497,GO:0006505,GO:0006506,GO:0006629,GO:0006643,GO:0006644,GO:0006650,GO:0006661,GO:0006664,GO:0006793,GO:0006796,GO:0006807,GO:0008150,GO:0008152,GO:0008610,GO:0008654,GO:0009058,GO:0009059,GO:0009247,GO:0009987,GO:0012505,GO:0016020,GO:0016021,GO:0016254,GO:0016740,GO:0016772,GO:0016780,GO:…	-	ko:K05310	ko00563,map00563	-	R05924	RC00017	ko00000,ko00001,ko01000	-	-	-	Phosphodiest
LEUER_T0000532	pigg	8479.XP_008170885.1	0.0	1200.0	COG1524@1|root,KOG2125@2759|Eukaryota,38FH1@33154|Opisthokonta,3BDEU@33208|Metazoa,3CUSQ@33213|Bilateria,4828X@7711|Chordata,490ZN@7742|Vertebrata,4C97Z@8459|Testudines	33208|Metazoa	T	Phosphatidylinositol glycan anchor biosynthesis, class G	PIGG	GO:0003674,GO:0003824,GO:0005575,GO:0005622,GO:0005623,GO:0005737,GO:0005783,GO:0005789,GO:0006464,GO:0006497,GO:0006505,GO:0006506,GO:0006629,GO:0006643,GO:0006644,GO:0006650,GO:0006661,GO:0006664,GO:0006793,GO:0006796,GO:0006807,GO:0008150,GO:0008152,GO:0008610,GO:0008654,GO:0009058,GO:0009059,GO:0009247,GO:0009987,GO:0012505,GO:0016020,GO:0016021,GO:0016254,GO:0016740,GO:0016772,GO:0016780,GO:…	-	ko:K05310	ko00563,map00563	-	R05924	RC00017	ko00000,ko00001,ko01000	-	-	-	Phosphodiest
LEUER_T0000533	hook3	43179.ENSSTOP00000017950	1.5e-31	116.0	2CMK1@1|root,2QQM8@2759|Eukaryota,38C80@33154|Opisthokonta,3CQAV@33208|Metazoa,3E6GH@33213|Bilateria,48RZC@7711|Chordata,49NEC@7742|Vertebrata,3JQ92@40674|Mammalia,35URQ@314146|Euarchontoglires,4QAFD@9989|Rodentia	33208|Metazoa	S	HOOK protein	hook1	GO:0000226,GO:0003674,GO:0005488,GO:0005515,GO:0005575,GO:0005622,GO:0005623,GO:0005737,GO:0005813,GO:0005815,GO:0005856,GO:0006810,GO:0006996,GO:0007010,GO:0007017,GO:0007032,GO:0007033,GO:0007034,GO:0007040,GO:0007041,GO:0008017,GO:0008092,GO:0008150,GO:0008333,GO:0009987,GO:0010256,GO:0015630,GO:0015631,GO:0016043,GO:0016050,GO:0016192,GO:0016482,GO:0030705,GO:0031122,GO:0032991,GO:0043226,GO:…	-	ko:K16612	-	-	-	-	ko00000,ko04812	-	-	-	HOOK
LEUER_T0000534	hook3	43179.ENSSTOP00000017950	1.5e-31	116.0	2CMK1@1|root,2QQM8@2759|Eukaryota,38C80@33154|Opisthokonta,3CQAV@33208|Metazoa,3E6GH@33213|Bilateria,48RZC@7711|Chordata,49NEC@7742|Vertebrata,3JQ92@40674|Mammalia,35URQ@314146|Euarchontoglires,4QAFD@9989|Rodentia	33208|Metazoa	S	HOOK protein	hook1	GO:0000226,GO:0003674,GO:0005488,GO:0005515,GO:0005575,GO:0005622,GO:0005623,GO:0005737,GO:0005813,GO:0005815,GO:0005856,GO:0006810,GO:0006996,GO:0007010,GO:0007017,GO:0007032,GO:0007033,GO:0007034,GO:0007040,GO:0007041,GO:0008017,GO:0008092,GO:0008150,GO:0008333,GO:0009987,GO:0010256,GO:0015630,GO:0015631,GO:0016043,GO:0016050,GO:0016192,GO:0016482,GO:0030705,GO:0031122,GO:0032991,GO:0043226,GO:…	-	ko:K16612	-	-	-	-	ko00000,ko04812	-	-	-	HOOK
LEUER_T0000535	hook3	43179.ENSSTOP00000017950	1.5e-31	116.0	2CMK1@1|root,2QQM8@2759|Eukaryota,38C80@33154|Opisthokonta,3CQAV@33208|Metazoa,3E6GH@33213|Bilateria,48RZC@7711|Chordata,49NEC@7742|Vertebrata,3JQ92@40674|Mammalia,35URQ@314146|Euarchontoglires,4QAFD@9989|Rodentia	33208|Metazoa	S	HOOK protein	hook1	GO:0000226,GO:0003674,GO:0005488,GO:0005515,GO:0005575,GO:0005622,GO:0005623,GO:0005737,GO:0005813,GO:0005815,GO:0005856,GO:0006810,GO:0006996,GO:0007010,GO:0007017,GO:0007032,GO:0007033,GO:0007034,GO:0007040,GO:0007041,GO:0008017,GO:0008092,GO:0008150,GO:0008333,GO:0009987,GO:0010256,GO:0015630,GO:0015631,GO:0016043,GO:0016050,GO:0016192,GO:0016482,GO:0030705,GO:0031122,GO:0032991,GO:0043226,GO:…	-	ko:K16612	-	-	-	-	ko00000,ko04812	-	-	-	HOOK
LEUER_T0000536	rnf170	52644.XP_010567477.1	1.02e-129	374.0	KOG2164@1|root,KOG2164@2759|Eukaryota,38E59@33154|Opisthokonta,3BERY@33208|Metazoa,3CS6V@33213|Bilateria,485EF@7711|Chordata,496TH@7742|Vertebrata,4GNJD@8782|Aves	33208|Metazoa	O	E3 ubiquitin-protein ligase RNF170 isoform X1	RNF170	GO:0007275,GO:0008150,GO:0009790,GO:0009792,GO:0032501,GO:0032502,GO:0043009,GO:0048856	2.3.2.27	ko:K15707	-	-	-	-	ko00000,ko01000,ko04121	-	-	-	DUF1232,zf-C3HC4,zf-RING_UBOX
LEUER_T0000537	LOC116973400	7955.ENSDARP00000088526	2.5e-47	167.0	KOG0837@1|root,KOG0837@2759|Eukaryota,39RNZ@33154|Opisthokonta,3BM4K@33208|Metazoa,3CXFS@33213|Bilateria,4884R@7711|Chordata,48UTH@7742|Vertebrata,49ZID@7898|Actinopterygii	33208|Metazoa	K	Transcription factor	JUND	GO:0000122,GO:0000228,GO:0000785,GO:0000790,GO:0000976,GO:0000977,GO:0000978,GO:0000981,GO:0000982,GO:0000987,GO:0001012,GO:0001067,GO:0001077,GO:0001228,GO:0001503,GO:0001649,GO:0002076,GO:0002237,GO:0003674,GO:0003676,GO:0003677,GO:0003690,GO:0003700,GO:0003712,GO:0003713,GO:0005102,GO:0005488,GO:0005515,GO:0005575,GO:0005622,GO:0005623,GO:0005634,GO:0005654,GO:0005667,GO:0005694,GO:0006139,GO:…	-	ko:K04449	ko04010,ko04380,ko04657,map04010,map04380,map04657	-	-	-	ko00000,ko00001,ko03000	-	-	-	Jun,bZIP_1
LEUER_T0000539	thap1	13616.ENSMODP00000012640	2.82e-50	168.0	2CUFX@1|root,2RM7T@2759|Eukaryota,38W0P@33154|Opisthokonta,3C5RJ@33208|Metazoa,3DM8J@33213|Bilateria,48SUU@7711|Chordata,49IC1@7742|Vertebrata,3JM6N@40674|Mammalia,4KAEG@9263|Metatheria	33208|Metazoa	L	THAP	-	-	-	-	-	-	-	-	-	-	-	-	THAP
LEUER_T0000538	thap1	13616.ENSMODP00000012640	4.32e-60	194.0	2CUFX@1|root,2RM7T@2759|Eukaryota,38W0P@33154|Opisthokonta,3C5RJ@33208|Metazoa,3DM8J@33213|Bilateria,48SUU@7711|Chordata,49IC1@7742|Vertebrata,3JM6N@40674|Mammalia,4KAEG@9263|Metatheria	33208|Metazoa	L	THAP	-	-	-	-	-	-	-	-	-	-	-	-	THAP
LEUER_T0000540	polr2b	13616.ENSMODP00000040055	0.0	2322.0	COG0085@1|root,KOG0214@2759|Eukaryota,38F5S@33154|Opisthokonta,3BFJJ@33208|Metazoa,3CVQS@33213|Bilateria,482Z3@7711|Chordata,48ZKI@7742|Vertebrata,3J285@40674|Mammalia,4JZ6H@9263|Metatheria	33208|Metazoa	K	Polymerase (RNA) II (DNA directed) polypeptide B, 140kDa	POLR2B	GO:0000375,GO:0000377,GO:0000398,GO:0000428,GO:0003674,GO:0003676,GO:0003677,GO:0003682,GO:0003824,GO:0003899,GO:0005488,GO:0005575,GO:0005622,GO:0005623,GO:0005634,GO:0005654,GO:0005665,GO:0006139,GO:0006259,GO:0006281,GO:0006283,GO:0006289,GO:0006351,GO:0006352,GO:0006354,GO:0006366,GO:0006367,GO:0006368,GO:0006370,GO:0006396,GO:0006397,GO:0006725,GO:0006807,GO:0006950,GO:0006974,GO:0007154,GO:…	2.7.7.6	ko:K03010	ko00230,ko00240,ko01100,ko03020,ko05016,ko05169,map00230,map00240,map01100,map03020,map05016,map05169	M00180	R00435,R00441,R00442,R00443	RC02795	br01611,ko00000,ko00001,ko00002,ko01000,ko03021,ko03400	-	-	-	RNA_pol_Rpb2_1,RNA_pol_Rpb2_2,RNA_pol_Rpb2_3,RNA_pol_Rpb2_4,RNA_pol_Rpb2_5,RNA_pol_Rpb2_6,RNA_pol_Rpb2_7
LEUER_T0000541	igfbp7	176946.XP_007427073.1	2.19e-104	311.0	293FE@1|root,2RACD@2759|Eukaryota,39SXP@33154|Opisthokonta,3BJSY@33208|Metazoa,3CU4C@33213|Bilateria,4835X@7711|Chordata,496G0@7742|Vertebrata	33208|Metazoa	T	Insulin-like growth	IGFBP7	GO:0005575,GO:0005576,GO:0005622,GO:0005623,GO:0005737,GO:0005783,GO:0005788,GO:0006464,GO:0006807,GO:0007155,GO:0007275,GO:0007423,GO:0008150,GO:0008152,GO:0008285,GO:0009889,GO:0009987,GO:0012505,GO:0019216,GO:0019218,GO:0019222,GO:0019538,GO:0022610,GO:0031974,GO:0032501,GO:0032502,GO:0036211,GO:0042127,GO:0043170,GO:0043226,GO:0043227,GO:0043229,GO:0043231,GO:0043233,GO:0043412,GO:0043583,GO:…	-	-	-	-	-	-	-	-	-	-	I-set,IGFBP,Ig_3,Kazal_2
LEUER_T0000542	igfbpl1	9315.ENSMEUP00000001608	2.83e-107	320.0	293FE@1|root,2QSKF@2759|Eukaryota,3A0ES@33154|Opisthokonta,3BFEC@33208|Metazoa,3CZS6@33213|Bilateria,48C8Q@7711|Chordata,498FC@7742|Vertebrata,3J3IH@40674|Mammalia,4K538@9263|Metatheria	33208|Metazoa	T	Insulin-like growth factor binding protein-like 1	IGFBPL1	GO:0002347,GO:0005575,GO:0005576,GO:0005615,GO:0008150,GO:0009607,GO:0009987,GO:0044421,GO:0050896,GO:0051716,GO:0071216,GO:0071228	-	-	-	-	-	-	-	-	-	-	I-set,IGFBP,Ig_3,Kazal_1,Kazal_2
LEUER_T0000546	thsd4	181119.XP_005521513.1	0.0	1008.0	KOG3538@1|root,KOG3538@2759|Eukaryota,KOG4597@2759|Eukaryota,393IC@33154|Opisthokonta,3B9QK@33208|Metazoa,3CRM0@33213|Bilateria,47Z90@7711|Chordata,492BB@7742|Vertebrata,4GPD6@8782|Aves	33208|Metazoa	O	thrombospondin type-1 domain-containing protein 4	THSD4	GO:0001527,GO:0005575,GO:0005576,GO:0008150,GO:0009987,GO:0016043,GO:0022607,GO:0030198,GO:0031012,GO:0043062,GO:0044085,GO:0044420,GO:0044421,GO:0048251,GO:0071840,GO:0085029,GO:0099080,GO:0099081,GO:0099512	-	-	-	-	-	-	-	-	-	-	ADAM_spacer1,PLAC,TSP_1
LEUER_T0000543	thsd4	181119.XP_005521513.1	0.0	1008.0	KOG3538@1|root,KOG3538@2759|Eukaryota,KOG4597@2759|Eukaryota,393IC@33154|Opisthokonta,3B9QK@33208|Metazoa,3CRM0@33213|Bilateria,47Z90@7711|Chordata,492BB@7742|Vertebrata,4GPD6@8782|Aves	33208|Metazoa	O	thrombospondin type-1 domain-containing protein 4	THSD4	GO:0001527,GO:0005575,GO:0005576,GO:0008150,GO:0009987,GO:0016043,GO:0022607,GO:0030198,GO:0031012,GO:0043062,GO:0044085,GO:0044420,GO:0044421,GO:0048251,GO:0071840,GO:0085029,GO:0099080,GO:0099081,GO:0099512	-	-	-	-	-	-	-	-	-	-	ADAM_spacer1,PLAC,TSP_1
LEUER_T0000545	thsd4	181119.XP_005521513.1	0.0	1007.0	KOG3538@1|root,KOG3538@2759|Eukaryota,KOG4597@2759|Eukaryota,393IC@33154|Opisthokonta,3B9QK@33208|Metazoa,3CRM0@33213|Bilateria,47Z90@7711|Chordata,492BB@7742|Vertebrata,4GPD6@8782|Aves	33208|Metazoa	O	thrombospondin type-1 domain-containing protein 4	THSD4	GO:0001527,GO:0005575,GO:0005576,GO:0008150,GO:0009987,GO:0016043,GO:0022607,GO:0030198,GO:0031012,GO:0043062,GO:0044085,GO:0044420,GO:0044421,GO:0048251,GO:0071840,GO:0085029,GO:0099080,GO:0099081,GO:0099512	-	-	-	-	-	-	-	-	-	-	ADAM_spacer1,PLAC,TSP_1
LEUER_T0000544	thsd4	181119.XP_005521513.1	0.0	1008.0	KOG3538@1|root,KOG3538@2759|Eukaryota,KOG4597@2759|Eukaryota,393IC@33154|Opisthokonta,3B9QK@33208|Metazoa,3CRM0@33213|Bilateria,47Z90@7711|Chordata,492BB@7742|Vertebrata,4GPD6@8782|Aves	33208|Metazoa	O	thrombospondin type-1 domain-containing protein 4	THSD4	GO:0001527,GO:0005575,GO:0005576,GO:0008150,GO:0009987,GO:0016043,GO:0022607,GO:0030198,GO:0031012,GO:0043062,GO:0044085,GO:0044420,GO:0044421,GO:0048251,GO:0071840,GO:0085029,GO:0099080,GO:0099081,GO:0099512	-	-	-	-	-	-	-	-	-	-	ADAM_spacer1,PLAC,TSP_1
LEUER_T0000547	exosc3	7897.ENSLACP00000006568	1.95e-117	342.0	COG1097@1|root,KOG1004@2759|Eukaryota,38D9X@33154|Opisthokonta,3BG1N@33208|Metazoa,3CTBI@33213|Bilateria,488NI@7711|Chordata,48V04@7742|Vertebrata	33208|Metazoa	J	Exosome complex component	EXOSC3	GO:0000018,GO:0000175,GO:0000176,GO:0000177,GO:0000178,GO:0000288,GO:0000291,GO:0000459,GO:0000460,GO:0000466,GO:0000467,GO:0000469,GO:0000785,GO:0000956,GO:0001775,GO:0002164,GO:0002200,GO:0002204,GO:0002208,GO:0002250,GO:0002252,GO:0002263,GO:0002285,GO:0002312,GO:0002366,GO:0002376,GO:0002377,GO:0002381,GO:0002440,GO:0002443,GO:0002449,GO:0002460,GO:0002520,GO:0002562,GO:0002637,GO:0002639,GO:…	-	ko:K03681	ko03018,map03018	M00391	-	-	ko00000,ko00001,ko00002,ko03019	-	-	-	KH_6
LEUER_T0000550	hopx	7897.ENSLACP00000003842	1.45e-22	89.4	KOG0490@1|root,KOG0490@2759|Eukaryota,3A9VJ@33154|Opisthokonta,3BUAP@33208|Metazoa,3D9AX@33213|Bilateria,48FUP@7711|Chordata,49CS4@7742|Vertebrata	33208|Metazoa	K	positive regulation of skeletal muscle tissue regeneration	HOPX	GO:0000122,GO:0001701,GO:0001824,GO:0001825,GO:0001829,GO:0005575,GO:0005622,GO:0005623,GO:0005634,GO:0006325,GO:0006355,GO:0006357,GO:0006464,GO:0006476,GO:0006807,GO:0006996,GO:0007275,GO:0007507,GO:0008016,GO:0008150,GO:0008152,GO:0009653,GO:0009790,GO:0009792,GO:0009889,GO:0009890,GO:0009892,GO:0009987,GO:0010468,GO:0010556,GO:0010558,GO:0010605,GO:0010629,GO:0016043,GO:0016569,GO:0016570,GO:…	-	-	-	-	-	-	-	-	-	-	Homeobox
LEUER_T0000551	LOC116973458	7918.ENSLOCP00000015073	0.0	1338.0	KOG3689@1|root,KOG3689@2759|Eukaryota,38D3S@33154|Opisthokonta,3BAM0@33208|Metazoa,3CWNN@33213|Bilateria,484VT@7711|Chordata,497YP@7742|Vertebrata,49UCK@7898|Actinopterygii	33208|Metazoa	T	Phosphodiesterase 6B, cGMP-specific, rod, beta	pde6b	-	3.1.4.35	ko:K13756	ko00230,ko04744,map00230,map04744	-	R01234	RC00296	ko00000,ko00001,ko01000	-	-	-	GAF,PDEase_I
LEUER_T0000552	LOC116973473	8932.XP_005504639.1	1.04e-32	114.0	KOG4326@1|root,KOG4326@2759|Eukaryota,3A9AT@33154|Opisthokonta,3BUVP@33208|Metazoa,3DA3J@33213|Bilateria,48G5C@7711|Chordata,49CW8@7742|Vertebrata,4GVNM@8782|Aves	33208|Metazoa	T	ATP synthase subunit e	ATP5I	GO:0000276,GO:0003674,GO:0005215,GO:0005575,GO:0005622,GO:0005623,GO:0005737,GO:0005739,GO:0005740,GO:0005743,GO:0005753,GO:0006091,GO:0006119,GO:0006139,GO:0006163,GO:0006164,GO:0006725,GO:0006753,GO:0006754,GO:0006793,GO:0006796,GO:0006807,GO:0006810,GO:0006811,GO:0006812,GO:0006839,GO:0006996,GO:0007005,GO:0007006,GO:0007007,GO:0008150,GO:0008152,GO:0009058,GO:0009117,GO:0009123,GO:0009124,GO:…	-	ko:K02129	ko00190,ko01100,ko04714,map00190,map01100,map04714	M00158	-	-	ko00000,ko00001,ko00002	3.A.2.1	-	-	ATP-synt_E
LEUER_T0000553	myl5	7918.ENSLOCP00000014880	1.75e-106	308.0	COG5126@1|root,KOG0031@2759|Eukaryota,38CR8@33154|Opisthokonta,3BJPW@33208|Metazoa,3CSM3@33213|Bilateria,486FZ@7711|Chordata,48V8U@7742|Vertebrata,4A707@7898|Actinopterygii	33208|Metazoa	Z	Myosin light chain 5	MYL5	GO:0003008,GO:0003012,GO:0003674,GO:0005198,GO:0005575,GO:0005622,GO:0005623,GO:0005737,GO:0005829,GO:0005856,GO:0005859,GO:0006936,GO:0006937,GO:0008150,GO:0008307,GO:0015629,GO:0016459,GO:0016460,GO:0032501,GO:0032991,GO:0043226,GO:0043228,GO:0043229,GO:0043232,GO:0043292,GO:0044057,GO:0044422,GO:0044424,GO:0044430,GO:0044444,GO:0044446,GO:0044449,GO:0044464,GO:0050789,GO:0051239,GO:0065007,GO:…	-	ko:K12753	ko04510,ko04670,ko04810,map04510,map04670,map04810	-	-	-	ko00000,ko00001,ko04812	-	-	-	EF-hand_1,EF-hand_6,EF-hand_8
LEUER_T0000554	nkx6-1	7897.ENSLACP00000012246	1.97e-142	412.0	KOG0850@1|root,KOG0847@2759|Eukaryota,38H0R@33154|Opisthokonta,3BEDJ@33208|Metazoa,3D0NE@33213|Bilateria,482SW@7711|Chordata,4902J@7742|Vertebrata	33208|Metazoa	K	regulation of transcription from RNA polymerase II promoter involved in spinal cord motor neuron fate specification	NKX6-1	GO:0000003,GO:0000122,GO:0000976,GO:0000977,GO:0000978,GO:0000981,GO:0000982,GO:0000987,GO:0001012,GO:0001067,GO:0001078,GO:0001227,GO:0001558,GO:0001708,GO:0002064,GO:0002065,GO:0002066,GO:0002067,GO:0002068,GO:0002069,GO:0002070,GO:0002071,GO:0002791,GO:0002793,GO:0003002,GO:0003006,GO:0003309,GO:0003323,GO:0003386,GO:0003387,GO:0003388,GO:0003674,GO:0003676,GO:0003677,GO:0003682,GO:0003690,GO:…	-	ko:K08030,ko:K09350	ko04950,map04950	-	-	-	ko00000,ko00001,ko03000	-	-	-	Homeobox
LEUER_T0000555	nkx6-1	7897.ENSLACP00000012246	1.97e-142	412.0	KOG0850@1|root,KOG0847@2759|Eukaryota,38H0R@33154|Opisthokonta,3BEDJ@33208|Metazoa,3D0NE@33213|Bilateria,482SW@7711|Chordata,4902J@7742|Vertebrata	33208|Metazoa	K	regulation of transcription from RNA polymerase II promoter involved in spinal cord motor neuron fate specification	NKX6-1	GO:0000003,GO:0000122,GO:0000976,GO:0000977,GO:0000978,GO:0000981,GO:0000982,GO:0000987,GO:0001012,GO:0001067,GO:0001078,GO:0001227,GO:0001558,GO:0001708,GO:0002064,GO:0002065,GO:0002066,GO:0002067,GO:0002068,GO:0002069,GO:0002070,GO:0002071,GO:0002791,GO:0002793,GO:0003002,GO:0003006,GO:0003309,GO:0003323,GO:0003386,GO:0003387,GO:0003388,GO:0003674,GO:0003676,GO:0003677,GO:0003682,GO:0003690,GO:…	-	ko:K08030,ko:K09350	ko04950,map04950	-	-	-	ko00000,ko00001,ko03000	-	-	-	Homeobox
LEUER_T0000559	gpat3	7918.ENSLOCP00000014929	2.22e-244	680.0	COG0204@1|root,KOG2898@2759|Eukaryota,38G7K@33154|Opisthokonta,3BAXG@33208|Metazoa,3CW3W@33213|Bilateria,4858D@7711|Chordata,4915A@7742|Vertebrata,4A0FM@7898|Actinopterygii	33208|Metazoa	I	1-acylglycerol-3-phosphate O-acyltransferase 9, like	AGPAT9	GO:0003674,GO:0003824,GO:0003841,GO:0004366,GO:0005575,GO:0005622,GO:0005623,GO:0005737,GO:0005783,GO:0005789,GO:0006629,GO:0006638,GO:0006639,GO:0006641,GO:0006644,GO:0006650,GO:0006654,GO:0006793,GO:0006796,GO:0008150,GO:0008152,GO:0008374,GO:0008610,GO:0008654,GO:0009058,GO:0009966,GO:0009987,GO:0010646,GO:0012505,GO:0016020,GO:0016411,GO:0016740,GO:0016746,GO:0016747,GO:0019432,GO:0019637,GO:…	2.3.1.15	ko:K13506	ko00561,ko00564,ko01100,ko01110,map00561,map00564,map01100,map01110	M00089	R00851,R09380	RC00004,RC00039,RC00041	ko00000,ko00001,ko00002,ko01000,ko01004	-	-	-	Acyltransferase
LEUER_T0000557	gpat3	7918.ENSLOCP00000014929	2.22e-244	680.0	COG0204@1|root,KOG2898@2759|Eukaryota,38G7K@33154|Opisthokonta,3BAXG@33208|Metazoa,3CW3W@33213|Bilateria,4858D@7711|Chordata,4915A@7742|Vertebrata,4A0FM@7898|Actinopterygii	33208|Metazoa	I	1-acylglycerol-3-phosphate O-acyltransferase 9, like	AGPAT9	GO:0003674,GO:0003824,GO:0003841,GO:0004366,GO:0005575,GO:0005622,GO:0005623,GO:0005737,GO:0005783,GO:0005789,GO:0006629,GO:0006638,GO:0006639,GO:0006641,GO:0006644,GO:0006650,GO:0006654,GO:0006793,GO:0006796,GO:0008150,GO:0008152,GO:0008374,GO:0008610,GO:0008654,GO:0009058,GO:0009966,GO:0009987,GO:0010646,GO:0012505,GO:0016020,GO:0016411,GO:0016740,GO:0016746,GO:0016747,GO:0019432,GO:0019637,GO:…	2.3.1.15	ko:K13506	ko00561,ko00564,ko01100,ko01110,map00561,map00564,map01100,map01110	M00089	R00851,R09380	RC00004,RC00039,RC00041	ko00000,ko00001,ko00002,ko01000,ko01004	-	-	-	Acyltransferase
LEUER_T0000556	gpat3	7918.ENSLOCP00000014929	2.22e-244	680.0	COG0204@1|root,KOG2898@2759|Eukaryota,38G7K@33154|Opisthokonta,3BAXG@33208|Metazoa,3CW3W@33213|Bilateria,4858D@7711|Chordata,4915A@7742|Vertebrata,4A0FM@7898|Actinopterygii	33208|Metazoa	I	1-acylglycerol-3-phosphate O-acyltransferase 9, like	AGPAT9	GO:0003674,GO:0003824,GO:0003841,GO:0004366,GO:0005575,GO:0005622,GO:0005623,GO:0005737,GO:0005783,GO:0005789,GO:0006629,GO:0006638,GO:0006639,GO:0006641,GO:0006644,GO:0006650,GO:0006654,GO:0006793,GO:0006796,GO:0008150,GO:0008152,GO:0008374,GO:0008610,GO:0008654,GO:0009058,GO:0009966,GO:0009987,GO:0010646,GO:0012505,GO:0016020,GO:0016411,GO:0016740,GO:0016746,GO:0016747,GO:0019432,GO:0019637,GO:…	2.3.1.15	ko:K13506	ko00561,ko00564,ko01100,ko01110,map00561,map00564,map01100,map01110	M00089	R00851,R09380	RC00004,RC00039,RC00041	ko00000,ko00001,ko00002,ko01000,ko01004	-	-	-	Acyltransferase
LEUER_T0000558	gpat3	7918.ENSLOCP00000014929	2.22e-244	680.0	COG0204@1|root,KOG2898@2759|Eukaryota,38G7K@33154|Opisthokonta,3BAXG@33208|Metazoa,3CW3W@33213|Bilateria,4858D@7711|Chordata,4915A@7742|Vertebrata,4A0FM@7898|Actinopterygii	33208|Metazoa	I	1-acylglycerol-3-phosphate O-acyltransferase 9, like	AGPAT9	GO:0003674,GO:0003824,GO:0003841,GO:0004366,GO:0005575,GO:0005622,GO:0005623,GO:0005737,GO:0005783,GO:0005789,GO:0006629,GO:0006638,GO:0006639,GO:0006641,GO:0006644,GO:0006650,GO:0006654,GO:0006793,GO:0006796,GO:0008150,GO:0008152,GO:0008374,GO:0008610,GO:0008654,GO:0009058,GO:0009966,GO:0009987,GO:0010646,GO:0012505,GO:0016020,GO:0016411,GO:0016740,GO:0016746,GO:0016747,GO:0019432,GO:0019637,GO:…	2.3.1.15	ko:K13506	ko00561,ko00564,ko01100,ko01110,map00561,map00564,map01100,map01110	M00089	R00851,R09380	RC00004,RC00039,RC00041	ko00000,ko00001,ko00002,ko01000,ko01004	-	-	-	Acyltransferase
LEUER_T0000560	abraxas1	7897.ENSLACP00000012992	1.05e-110	338.0	28NSC@1|root,2QVCD@2759|Eukaryota,38G1D@33154|Opisthokonta,3BHQ2@33208|Metazoa,3D1RM@33213|Bilateria,48A7F@7711|Chordata,498PI@7742|Vertebrata	33208|Metazoa	S	signal transduction involved in G2 DNA damage checkpoint	FAM175A	GO:0000075,GO:0000077,GO:0000726,GO:0003674,GO:0005488,GO:0005515,GO:0005575,GO:0005622,GO:0005623,GO:0005634,GO:0005654,GO:0006139,GO:0006259,GO:0006281,GO:0006282,GO:0006302,GO:0006303,GO:0006464,GO:0006508,GO:0006725,GO:0006807,GO:0006950,GO:0006974,GO:0007154,GO:0007165,GO:0008150,GO:0008152,GO:0009314,GO:0009628,GO:0009893,GO:0009987,GO:0010212,GO:0010564,GO:0010604,GO:0010948,GO:0016579,GO:…	-	ko:K20774,ko:K20799	ko03440,map03440	-	-	-	ko00000,ko00001,ko03036,ko03400,ko04121	-	-	-	-
LEUER_T0000561	mrps18c	7918.ENSLOCP00000014907	8.54e-54	172.0	KOG3162@1|root,KOG3162@2759|Eukaryota,3A4HA@33154|Opisthokonta,3BRCW@33208|Metazoa,3D87V@33213|Bilateria,48E4F@7711|Chordata,49B68@7742|Vertebrata,4A3WG@7898|Actinopterygii	33208|Metazoa	J	ribosomal protein S18C	MRPS18C	GO:0000313,GO:0000314,GO:0003674,GO:0003735,GO:0005198,GO:0005575,GO:0005622,GO:0005623,GO:0005737,GO:0005739,GO:0005740,GO:0005743,GO:0005759,GO:0005761,GO:0005763,GO:0005829,GO:0005840,GO:0006412,GO:0006414,GO:0006415,GO:0006518,GO:0006807,GO:0008150,GO:0008152,GO:0009058,GO:0009059,GO:0009987,GO:0010467,GO:0015935,GO:0016020,GO:0016043,GO:0019538,GO:0019866,GO:0022411,GO:0022626,GO:0022627,GO:…	-	ko:K02963	ko03010,map03010	M00178	-	-	br01610,ko00000,ko00001,ko00002,ko03011	-	-	-	Ribosomal_S18
LEUER_T0000562	mrps18c	7918.ENSLOCP00000014907	8.54e-54	172.0	KOG3162@1|root,KOG3162@2759|Eukaryota,3A4HA@33154|Opisthokonta,3BRCW@33208|Metazoa,3D87V@33213|Bilateria,48E4F@7711|Chordata,49B68@7742|Vertebrata,4A3WG@7898|Actinopterygii	33208|Metazoa	J	ribosomal protein S18C	MRPS18C	GO:0000313,GO:0000314,GO:0003674,GO:0003735,GO:0005198,GO:0005575,GO:0005622,GO:0005623,GO:0005737,GO:0005739,GO:0005740,GO:0005743,GO:0005759,GO:0005761,GO:0005763,GO:0005829,GO:0005840,GO:0006412,GO:0006414,GO:0006415,GO:0006518,GO:0006807,GO:0008150,GO:0008152,GO:0009058,GO:0009059,GO:0009987,GO:0010467,GO:0015935,GO:0016020,GO:0016043,GO:0019538,GO:0019866,GO:0022411,GO:0022626,GO:0022627,GO:…	-	ko:K02963	ko03010,map03010	M00178	-	-	br01610,ko00000,ko00001,ko00002,ko03011	-	-	-	Ribosomal_S18
LEUER_T0000564	helq	8479.XP_008163870.1	0.0	1125.0	COG0749@1|root,KOG0950@2759|Eukaryota,38BKB@33154|Opisthokonta,3BATG@33208|Metazoa,3CT13@33213|Bilateria,480AN@7711|Chordata,48WKW@7742|Vertebrata,4CFXM@8459|Testudines	33208|Metazoa	A	Helicase POLQ-like	HELQ	GO:0000003,GO:0000280,GO:0000712,GO:0000724,GO:0000725,GO:0001709,GO:0003002,GO:0003006,GO:0003674,GO:0003678,GO:0003724,GO:0003824,GO:0004003,GO:0004004,GO:0004386,GO:0005488,GO:0005515,GO:0005575,GO:0005622,GO:0005623,GO:0005634,GO:0005730,GO:0005737,GO:0006139,GO:0006259,GO:0006281,GO:0006302,GO:0006310,GO:0006403,GO:0006417,GO:0006725,GO:0006807,GO:0006950,GO:0006974,GO:0006996,GO:0007049,GO:…	2.7.7.7,3.6.4.12	ko:K16618,ko:K19178	ko03460,map03460	-	-	-	ko00000,ko00001,ko01000,ko03400	-	-	-	DEAD,Helicase_C
LEUER_T0000563	helq	8479.XP_008163870.1	0.0	1181.0	COG0749@1|root,KOG0950@2759|Eukaryota,38BKB@33154|Opisthokonta,3BATG@33208|Metazoa,3CT13@33213|Bilateria,480AN@7711|Chordata,48WKW@7742|Vertebrata,4CFXM@8459|Testudines	33208|Metazoa	A	Helicase POLQ-like	HELQ	GO:0000003,GO:0000280,GO:0000712,GO:0000724,GO:0000725,GO:0001709,GO:0003002,GO:0003006,GO:0003674,GO:0003678,GO:0003724,GO:0003824,GO:0004003,GO:0004004,GO:0004386,GO:0005488,GO:0005515,GO:0005575,GO:0005622,GO:0005623,GO:0005634,GO:0005730,GO:0005737,GO:0006139,GO:0006259,GO:0006281,GO:0006302,GO:0006310,GO:0006403,GO:0006417,GO:0006725,GO:0006807,GO:0006950,GO:0006974,GO:0006996,GO:0007049,GO:…	2.7.7.7,3.6.4.12	ko:K16618,ko:K19178	ko03460,map03460	-	-	-	ko00000,ko00001,ko01000,ko03400	-	-	-	DEAD,Helicase_C
LEUER_T0000565	helq	128390.XP_009465876.1	0.0	992.0	COG0749@1|root,KOG0950@2759|Eukaryota,38BKB@33154|Opisthokonta,3BATG@33208|Metazoa,3CT13@33213|Bilateria,480AN@7711|Chordata,48WKW@7742|Vertebrata,4GTHH@8782|Aves	33208|Metazoa	A	Helicase, POLQ-like	HELQ	GO:0000003,GO:0000280,GO:0000712,GO:0000724,GO:0000725,GO:0001709,GO:0003002,GO:0003006,GO:0003674,GO:0003678,GO:0003724,GO:0003824,GO:0004003,GO:0004004,GO:0004386,GO:0005488,GO:0005515,GO:0005575,GO:0005622,GO:0005623,GO:0005634,GO:0005730,GO:0005737,GO:0006139,GO:0006259,GO:0006281,GO:0006302,GO:0006310,GO:0006403,GO:0006417,GO:0006725,GO:0006807,GO:0006950,GO:0006974,GO:0006996,GO:0007049,GO:…	2.7.7.7,3.6.4.12	ko:K16618,ko:K19178	ko03460,map03460	-	-	-	ko00000,ko00001,ko01000,ko03400	-	-	-	DEAD,Helicase_C
LEUER_T0000566	hpse	7897.ENSLACP00000022703	1.23e-184	536.0	28IFX@1|root,2QQST@2759|Eukaryota,38CR7@33154|Opisthokonta,3BE35@33208|Metazoa,3CRIP@33213|Bilateria,4806M@7711|Chordata,492NY@7742|Vertebrata	33208|Metazoa	S	heparanase activity	HPSE	GO:0000323,GO:0001525,GO:0001568,GO:0001775,GO:0001817,GO:0001819,GO:0001944,GO:0002252,GO:0002263,GO:0002274,GO:0002275,GO:0002283,GO:0002366,GO:0002376,GO:0002443,GO:0002444,GO:0002446,GO:0003674,GO:0003824,GO:0004553,GO:0004566,GO:0005488,GO:0005515,GO:0005575,GO:0005576,GO:0005622,GO:0005623,GO:0005634,GO:0005654,GO:0005737,GO:0005764,GO:0005765,GO:0005773,GO:0005774,GO:0005775,GO:0006022,GO:…	3.2.1.166	ko:K07964,ko:K07965	ko00531,ko01100,ko05205,map00531,map01100,map05205	M00078	R07811	-	ko00000,ko00001,ko00002,ko00536,ko01000	-	GH79	-	Glyco_hydro_79n
LEUER_T0000567	fnta	28377.ENSACAP00000005850	4.03e-115	347.0	COG5536@1|root,KOG0530@2759|Eukaryota,38GA2@33154|Opisthokonta,3B9TJ@33208|Metazoa,3CWS7@33213|Bilateria,48603@7711|Chordata,48W2G@7742|Vertebrata	33208|Metazoa	O	positive regulation of tubulin deacetylation	FNTA	GO:0003674,GO:0003824,GO:0004659,GO:0004660,GO:0004661,GO:0004663,GO:0005102,GO:0005488,GO:0005515,GO:0005575,GO:0005622,GO:0005623,GO:0005737,GO:0005829,GO:0005856,GO:0005875,GO:0005953,GO:0005965,GO:0006464,GO:0006807,GO:0007154,GO:0007165,GO:0007166,GO:0007167,GO:0007178,GO:0007179,GO:0008017,GO:0008092,GO:0008150,GO:0008152,GO:0008284,GO:0008318,GO:0009719,GO:0009889,GO:0009890,GO:0009891,GO:…	2.5.1.58,2.5.1.59	ko:K05955	ko00900,ko01130,map00900,map01130	-	R09844	RC00069,RC03004	ko00000,ko00001,ko01000,ko01006	-	-	-	PPTA
LEUER_T0000568	pomk	8496.XP_006268533.1	1.25e-137	402.0	28IE4@1|root,2QQQV@2759|Eukaryota,38R4U@33154|Opisthokonta,3BG95@33208|Metazoa,3D0FT@33213|Bilateria,487CM@7711|Chordata,493RI@7742|Vertebrata	33208|Metazoa	T	carbohydrate phosphorylation	POMK	GO:0000166,GO:0001764,GO:0001871,GO:0003008,GO:0003674,GO:0003824,GO:0005488,GO:0005575,GO:0005622,GO:0005623,GO:0005737,GO:0005783,GO:0005789,GO:0005975,GO:0006464,GO:0006486,GO:0006493,GO:0006793,GO:0006796,GO:0006807,GO:0006928,GO:0007275,GO:0007399,GO:0007417,GO:0007420,GO:0007600,GO:0007610,GO:0007611,GO:0008150,GO:0008152,GO:0009058,GO:0009059,GO:0009100,GO:0009101,GO:0009987,GO:0012505,GO:…	2.7.1.183	ko:K17547	ko00515,ko01100,map00515,map01100	-	R11400	RC00017	ko00000,ko00001,ko01000,ko01001	-	-	-	Pkinase_Tyr
LEUER_T0000569	hgsnat	13735.ENSPSIP00000012194	4.34e-265	750.0	COG4299@1|root,KOG4683@2759|Eukaryota,38EYA@33154|Opisthokonta,3BFWA@33208|Metazoa,3D07S@33213|Bilateria,488FW@7711|Chordata,492W4@7742|Vertebrata,4C9V4@8459|Testudines	33208|Metazoa	S	Domain of unknown function (DUF5009)	HGSNAT	GO:0000323,GO:0001775,GO:0002252,GO:0002263,GO:0002274,GO:0002275,GO:0002283,GO:0002366,GO:0002376,GO:0002443,GO:0002444,GO:0002446,GO:0003674,GO:0003824,GO:0005575,GO:0005622,GO:0005623,GO:0005737,GO:0005764,GO:0005765,GO:0005773,GO:0005774,GO:0005886,GO:0006022,GO:0006026,GO:0006027,GO:0006807,GO:0006810,GO:0006887,GO:0006955,GO:0007034,GO:0007041,GO:0008080,GO:0008150,GO:0008152,GO:0009056,GO:…	2.3.1.78	ko:K10532	ko00531,ko01100,ko04142,map00531,map01100,map04142	M00078	R07815	-	ko00000,ko00001,ko00002,ko01000	-	-	-	DUF1624,DUF5009
LEUER_T0000570	LOC116973570	176946.XP_007428902.1	0.0	1801.0	COG0553@1|root,KOG0385@2759|Eukaryota,38F01@33154|Opisthokonta,3BDBS@33208|Metazoa,3CRHS@33213|Bilateria,47ZE2@7711|Chordata,48V9P@7742|Vertebrata	33208|Metazoa	K	nucleosome binding	SMARCA5	GO:0000003,GO:0000166,GO:0000183,GO:0000228,GO:0000785,GO:0000790,GO:0000793,GO:0000981,GO:0001650,GO:0003006,GO:0003674,GO:0003676,GO:0003677,GO:0003678,GO:0003700,GO:0003824,GO:0004386,GO:0005488,GO:0005515,GO:0005524,GO:0005575,GO:0005622,GO:0005623,GO:0005634,GO:0005654,GO:0005667,GO:0005677,GO:0005694,GO:0005700,GO:0005730,GO:0006139,GO:0006323,GO:0006325,GO:0006333,GO:0006334,GO:0006336,GO:…	-	ko:K11654,ko:K11727	-	-	-	-	ko00000,ko01000,ko03021,ko03036	-	-	-	DBINO,HAND,Helicase_C,SLIDE,SNF2_N
LEUER_T0000571	csgalnact1	7897.ENSLACP00000009487	0.0	878.0	KOG3588@1|root,KOG3588@2759|Eukaryota,38DJN@33154|Opisthokonta,3BAVK@33208|Metazoa,3CYIJ@33213|Bilateria,48776@7711|Chordata,48VPI@7742|Vertebrata	33208|Metazoa	G	glucuronylgalactosylproteoglycan 4-beta-N-acetylgalactosaminyltransferase activity	CSGALNACT1	GO:0000139,GO:0000271,GO:0001501,GO:0001503,GO:0001958,GO:0003674,GO:0003824,GO:0005488,GO:0005575,GO:0005622,GO:0005623,GO:0005737,GO:0005794,GO:0005975,GO:0005976,GO:0006022,GO:0006023,GO:0006024,GO:0006029,GO:0006040,GO:0006082,GO:0006139,GO:0006725,GO:0006790,GO:0006793,GO:0006807,GO:0006950,GO:0007275,GO:0007399,GO:0008037,GO:0008150,GO:0008152,GO:0008194,GO:0008283,GO:0008376,GO:0008955,GO:…	2.4.1.174,2.4.1.175	ko:K00746	ko00532,ko01100,map00532,map01100	M00058	R05929	-	ko00000,ko00001,ko00002,ko01000,ko01003	-	GT7	-	CHGN
LEUER_T0000572	csgalnact1	7897.ENSLACP00000009487	0.0	878.0	KOG3588@1|root,KOG3588@2759|Eukaryota,38DJN@33154|Opisthokonta,3BAVK@33208|Metazoa,3CYIJ@33213|Bilateria,48776@7711|Chordata,48VPI@7742|Vertebrata	33208|Metazoa	G	glucuronylgalactosylproteoglycan 4-beta-N-acetylgalactosaminyltransferase activity	CSGALNACT1	GO:0000139,GO:0000271,GO:0001501,GO:0001503,GO:0001958,GO:0003674,GO:0003824,GO:0005488,GO:0005575,GO:0005622,GO:0005623,GO:0005737,GO:0005794,GO:0005975,GO:0005976,GO:0006022,GO:0006023,GO:0006024,GO:0006029,GO:0006040,GO:0006082,GO:0006139,GO:0006725,GO:0006790,GO:0006793,GO:0006807,GO:0006950,GO:0007275,GO:0007399,GO:0008037,GO:0008150,GO:0008152,GO:0008194,GO:0008283,GO:0008376,GO:0008955,GO:…	2.4.1.174,2.4.1.175	ko:K00746	ko00532,ko01100,map00532,map01100	M00058	R05929	-	ko00000,ko00001,ko00002,ko01000,ko01003	-	GT7	-	CHGN
LEUER_T0000573	sh2d4a	7897.ENSLACP00000010876	2.03e-138	410.0	28P84@1|root,2QVV5@2759|Eukaryota,38I62@33154|Opisthokonta,3BD0U@33208|Metazoa,3D1U7@33213|Bilateria,48B5Z@7711|Chordata,495QE@7742|Vertebrata	33208|Metazoa	T	SH2 domain-containing protein 4A	SH2D4A	GO:0003674,GO:0005488,GO:0005515,GO:0005575,GO:0005622,GO:0005623,GO:0005737,GO:0005829,GO:0008150,GO:0009892,GO:0010563,GO:0010921,GO:0010923,GO:0019220,GO:0019222,GO:0019899,GO:0019902,GO:0031323,GO:0031324,GO:0035303,GO:0035305,GO:0043086,GO:0044092,GO:0044424,GO:0044444,GO:0044464,GO:0045936,GO:0048519,GO:0048523,GO:0050789,GO:0050790,GO:0050794,GO:0051174,GO:0051336,GO:0051346,GO:0065007,GO:…	-	ko:K17577	-	-	-	-	ko00000,ko01009	-	-	-	SH2
LEUER_T0000574	sh2d4a	7897.ENSLACP00000010876	2.03e-138	410.0	28P84@1|root,2QVV5@2759|Eukaryota,38I62@33154|Opisthokonta,3BD0U@33208|Metazoa,3D1U7@33213|Bilateria,48B5Z@7711|Chordata,495QE@7742|Vertebrata	33208|Metazoa	T	SH2 domain-containing protein 4A	SH2D4A	GO:0003674,GO:0005488,GO:0005515,GO:0005575,GO:0005622,GO:0005623,GO:0005737,GO:0005829,GO:0008150,GO:0009892,GO:0010563,GO:0010921,GO:0010923,GO:0019220,GO:0019222,GO:0019899,GO:0019902,GO:0031323,GO:0031324,GO:0035303,GO:0035305,GO:0043086,GO:0044092,GO:0044424,GO:0044444,GO:0044464,GO:0045936,GO:0048519,GO:0048523,GO:0050789,GO:0050790,GO:0050794,GO:0051174,GO:0051336,GO:0051346,GO:0065007,GO:…	-	ko:K17577	-	-	-	-	ko00000,ko01009	-	-	-	SH2
LEUER_T0000575	psd3	7897.ENSLACP00000000224	6.5e-24	97.1	COG5307@1|root,KOG0932@2759|Eukaryota,38HIY@33154|Opisthokonta,3BDCP@33208|Metazoa,3CX3V@33213|Bilateria,487K1@7711|Chordata,494CF@7742|Vertebrata	33208|Metazoa	U	PH and SEC7 domain-containing protein	PSD3	GO:0000226,GO:0000278,GO:0001558,GO:0001726,GO:0003674,GO:0005085,GO:0005086,GO:0005488,GO:0005515,GO:0005575,GO:0005622,GO:0005623,GO:0005737,GO:0005856,GO:0005874,GO:0005886,GO:0005938,GO:0006950,GO:0006996,GO:0006997,GO:0006998,GO:0007010,GO:0007017,GO:0007019,GO:0007049,GO:0007077,GO:0007088,GO:0007154,GO:0007165,GO:0007264,GO:0007265,GO:0007275,GO:0007346,GO:0007399,GO:0008150,GO:0008361,GO:…	-	ko:K12494	ko04144,map04144	-	-	-	ko00000,ko00001,ko04131	-	-	-	PH_9,Sec7
LEUER_T0000576	fut10	7897.ENSLACP00000002231	1.19e-231	649.0	KOG2619@1|root,KOG2619@2759|Eukaryota,38F5V@33154|Opisthokonta,3B9CA@33208|Metazoa,3CZV4@33213|Bilateria,482PT@7711|Chordata,496S0@7742|Vertebrata	33208|Metazoa	G	alpha-(1->3)-fucosyltransferase activity	FUT10	GO:0000003,GO:0000139,GO:0002376,GO:0002520,GO:0003674,GO:0003824,GO:0005575,GO:0005622,GO:0005623,GO:0005634,GO:0005654,GO:0005737,GO:0005783,GO:0005794,GO:0005975,GO:0005996,GO:0006004,GO:0006457,GO:0006464,GO:0006486,GO:0006605,GO:0006807,GO:0006810,GO:0006886,GO:0006928,GO:0006950,GO:0007275,GO:0007399,GO:0007417,GO:0007420,GO:0008104,GO:0008150,GO:0008152,GO:0008417,GO:0009056,GO:0009058,GO:…	-	ko:K09669,ko:K11257	-	-	-	-	ko00000,ko01000,ko01003	-	GT10	-	Glyco_tran_10_N,Glyco_transf_10
LEUER_T0000577	fut10	7897.ENSLACP00000002231	1.19e-231	649.0	KOG2619@1|root,KOG2619@2759|Eukaryota,38F5V@33154|Opisthokonta,3B9CA@33208|Metazoa,3CZV4@33213|Bilateria,482PT@7711|Chordata,496S0@7742|Vertebrata	33208|Metazoa	G	alpha-(1->3)-fucosyltransferase activity	FUT10	GO:0000003,GO:0000139,GO:0002376,GO:0002520,GO:0003674,GO:0003824,GO:0005575,GO:0005622,GO:0005623,GO:0005634,GO:0005654,GO:0005737,GO:0005783,GO:0005794,GO:0005975,GO:0005996,GO:0006004,GO:0006457,GO:0006464,GO:0006486,GO:0006605,GO:0006807,GO:0006810,GO:0006886,GO:0006928,GO:0006950,GO:0007275,GO:0007399,GO:0007417,GO:0007420,GO:0008104,GO:0008150,GO:0008152,GO:0008417,GO:0009056,GO:0009058,GO:…	-	ko:K09669,ko:K11257	-	-	-	-	ko00000,ko01000,ko01003	-	GT10	-	Glyco_tran_10_N,Glyco_transf_10
LEUER_T0000578	nrg1	8479.XP_008170864.1	3.38e-253	722.0	28J9V@1|root,2QRUM@2759|Eukaryota,38EBH@33154|Opisthokonta,3BH06@33208|Metazoa,3CVF2@33213|Bilateria,47YZ6@7711|Chordata,491KR@7742|Vertebrata,4C8FY@8459|Testudines	33208|Metazoa	T	Neuregulin family	NRG1	GO:0003674,GO:0005102,GO:0005178,GO:0005488,GO:0005515,GO:0005575,GO:0005576,GO:0005615,GO:0007154,GO:0007165,GO:0007166,GO:0007167,GO:0007169,GO:0007275,GO:0007399,GO:0008150,GO:0009987,GO:0023052,GO:0030154,GO:0032501,GO:0032502,GO:0035556,GO:0038127,GO:0043125,GO:0044421,GO:0044877,GO:0048513,GO:0048731,GO:0048856,GO:0048869,GO:0050789,GO:0050794,GO:0050839,GO:0050896,GO:0051716,GO:0065007	-	ko:K05455,ko:K05456	ko01521,ko04012,map01521,map04012	-	-	-	ko00000,ko00001,ko00536,ko04052	-	-	-	I-set,Neuregulin
LEUER_T0000579	nrg1	9767.XP_007170145.1	4.45e-233	671.0	28J9V@1|root,2QRUM@2759|Eukaryota,38EBH@33154|Opisthokonta,3BH06@33208|Metazoa,3CVF2@33213|Bilateria,47YZ6@7711|Chordata,491KR@7742|Vertebrata,3JDGF@40674|Mammalia,4J4CM@91561|Cetartiodactyla	33208|Metazoa	T	membrane-bound isoform-like isoform X1	NRG1	GO:0003674,GO:0005102,GO:0005178,GO:0005488,GO:0005515,GO:0005575,GO:0005576,GO:0005615,GO:0007154,GO:0007165,GO:0007166,GO:0007167,GO:0007169,GO:0007275,GO:0007399,GO:0008150,GO:0009987,GO:0023052,GO:0030154,GO:0032501,GO:0032502,GO:0035556,GO:0038127,GO:0043125,GO:0044421,GO:0044877,GO:0048513,GO:0048731,GO:0048856,GO:0048869,GO:0050789,GO:0050794,GO:0050839,GO:0050896,GO:0051716,GO:0065007	-	ko:K05455,ko:K05456	ko01521,ko04012,map01521,map04012	-	-	-	ko00000,ko00001,ko00536,ko04052	-	-	-	I-set,Neuregulin
LEUER_T0000580	nrg1	8479.XP_008170864.1	1.25e-243	697.0	28J9V@1|root,2QRUM@2759|Eukaryota,38EBH@33154|Opisthokonta,3BH06@33208|Metazoa,3CVF2@33213|Bilateria,47YZ6@7711|Chordata,491KR@7742|Vertebrata,4C8FY@8459|Testudines	33208|Metazoa	T	Neuregulin family	NRG1	GO:0003674,GO:0005102,GO:0005178,GO:0005488,GO:0005515,GO:0005575,GO:0005576,GO:0005615,GO:0007154,GO:0007165,GO:0007166,GO:0007167,GO:0007169,GO:0007275,GO:0007399,GO:0008150,GO:0009987,GO:0023052,GO:0030154,GO:0032501,GO:0032502,GO:0035556,GO:0038127,GO:0043125,GO:0044421,GO:0044877,GO:0048513,GO:0048731,GO:0048856,GO:0048869,GO:0050789,GO:0050794,GO:0050839,GO:0050896,GO:0051716,GO:0065007	-	ko:K05455,ko:K05456	ko01521,ko04012,map01521,map04012	-	-	-	ko00000,ko00001,ko00536,ko04052	-	-	-	I-set,Neuregulin
LEUER_T0000581	nrg1	9668.ENSMPUP00000010121	9.78e-221	633.0	28J9V@1|root,2QRUM@2759|Eukaryota,38EBH@33154|Opisthokonta,3BH06@33208|Metazoa,3CVF2@33213|Bilateria,47YZ6@7711|Chordata,491KR@7742|Vertebrata,3JDGF@40674|Mammalia,3EHNK@33554|Carnivora	33208|Metazoa	T	Neuregulin 1	NRG1	GO:0000165,GO:0000187,GO:0001558,GO:0001932,GO:0001934,GO:0003007,GO:0003008,GO:0003157,GO:0003158,GO:0003205,GO:0003206,GO:0003208,GO:0003222,GO:0003229,GO:0003231,GO:0003348,GO:0003674,GO:0003712,GO:0003824,GO:0004672,GO:0004713,GO:0005085,GO:0005088,GO:0005102,GO:0005125,GO:0005178,GO:0005488,GO:0005515,GO:0005575,GO:0005576,GO:0005615,GO:0005622,GO:0005623,GO:0005634,GO:0005654,GO:0005886,GO:…	-	ko:K05455,ko:K05456	ko01521,ko04012,map01521,map04012	-	-	-	ko00000,ko00001,ko00536,ko04052	-	-	-	EGF,I-set,Neuregulin
LEUER_T0000587	wrn	8479.XP_008171801.1	0.0	1156.0	COG0514@1|root,KOG4373@1|root,KOG0351@2759|Eukaryota,KOG4373@2759|Eukaryota,39TH4@33154|Opisthokonta,3BHTD@33208|Metazoa,3CWXS@33213|Bilateria,480K2@7711|Chordata,48VID@7742|Vertebrata,4CGP2@8459|Testudines	33208|Metazoa	A	Werner syndrome	WRN	GO:0000018,GO:0000217,GO:0000287,GO:0000400,GO:0000403,GO:0000405,GO:0000723,GO:0000724,GO:0000725,GO:0000731,GO:0000781,GO:0001302,GO:0001325,GO:0003674,GO:0003676,GO:0003677,GO:0003678,GO:0003682,GO:0003684,GO:0003824,GO:0004003,GO:0004386,GO:0004518,GO:0004527,GO:0005488,GO:0005515,GO:0005575,GO:0005622,GO:0005623,GO:0005634,GO:0005654,GO:0005657,GO:0005694,GO:0005730,GO:0005737,GO:0005813,GO:…	3.6.4.12	ko:K10900	-	-	-	-	ko00000,ko01000,ko03032,ko03400	-	-	-	DEAD,DNA_pol_A_exo1,HRDC,HTH_40,Helicase_C,RQC,RecQ_Zn_bind
LEUER_T0000584	wrn	8479.XP_008171801.1	0.0	1278.0	COG0514@1|root,KOG4373@1|root,KOG0351@2759|Eukaryota,KOG4373@2759|Eukaryota,39TH4@33154|Opisthokonta,3BHTD@33208|Metazoa,3CWXS@33213|Bilateria,480K2@7711|Chordata,48VID@7742|Vertebrata,4CGP2@8459|Testudines	33208|Metazoa	A	Werner syndrome	WRN	GO:0000018,GO:0000217,GO:0000287,GO:0000400,GO:0000403,GO:0000405,GO:0000723,GO:0000724,GO:0000725,GO:0000731,GO:0000781,GO:0001302,GO:0001325,GO:0003674,GO:0003676,GO:0003677,GO:0003678,GO:0003682,GO:0003684,GO:0003824,GO:0004003,GO:0004386,GO:0004518,GO:0004527,GO:0005488,GO:0005515,GO:0005575,GO:0005622,GO:0005623,GO:0005634,GO:0005654,GO:0005657,GO:0005694,GO:0005730,GO:0005737,GO:0005813,GO:…	3.6.4.12	ko:K10900	-	-	-	-	ko00000,ko01000,ko03032,ko03400	-	-	-	DEAD,DNA_pol_A_exo1,HRDC,HTH_40,Helicase_C,RQC,RecQ_Zn_bind
LEUER_T0000582	wrn	8479.XP_008171801.1	0.0	1276.0	COG0514@1|root,KOG4373@1|root,KOG0351@2759|Eukaryota,KOG4373@2759|Eukaryota,39TH4@33154|Opisthokonta,3BHTD@33208|Metazoa,3CWXS@33213|Bilateria,480K2@7711|Chordata,48VID@7742|Vertebrata,4CGP2@8459|Testudines	33208|Metazoa	A	Werner syndrome	WRN	GO:0000018,GO:0000217,GO:0000287,GO:0000400,GO:0000403,GO:0000405,GO:0000723,GO:0000724,GO:0000725,GO:0000731,GO:0000781,GO:0001302,GO:0001325,GO:0003674,GO:0003676,GO:0003677,GO:0003678,GO:0003682,GO:0003684,GO:0003824,GO:0004003,GO:0004386,GO:0004518,GO:0004527,GO:0005488,GO:0005515,GO:0005575,GO:0005622,GO:0005623,GO:0005634,GO:0005654,GO:0005657,GO:0005694,GO:0005730,GO:0005737,GO:0005813,GO:…	3.6.4.12	ko:K10900	-	-	-	-	ko00000,ko01000,ko03032,ko03400	-	-	-	DEAD,DNA_pol_A_exo1,HRDC,HTH_40,Helicase_C,RQC,RecQ_Zn_bind
LEUER_T0000585	wrn	8479.XP_008171801.1	0.0	1240.0	COG0514@1|root,KOG4373@1|root,KOG0351@2759|Eukaryota,KOG4373@2759|Eukaryota,39TH4@33154|Opisthokonta,3BHTD@33208|Metazoa,3CWXS@33213|Bilateria,480K2@7711|Chordata,48VID@7742|Vertebrata,4CGP2@8459|Testudines	33208|Metazoa	A	Werner syndrome	WRN	GO:0000018,GO:0000217,GO:0000287,GO:0000400,GO:0000403,GO:0000405,GO:0000723,GO:0000724,GO:0000725,GO:0000731,GO:0000781,GO:0001302,GO:0001325,GO:0003674,GO:0003676,GO:0003677,GO:0003678,GO:0003682,GO:0003684,GO:0003824,GO:0004003,GO:0004386,GO:0004518,GO:0004527,GO:0005488,GO:0005515,GO:0005575,GO:0005622,GO:0005623,GO:0005634,GO:0005654,GO:0005657,GO:0005694,GO:0005730,GO:0005737,GO:0005813,GO:…	3.6.4.12	ko:K10900	-	-	-	-	ko00000,ko01000,ko03032,ko03400	-	-	-	DEAD,DNA_pol_A_exo1,HRDC,HTH_40,Helicase_C,RQC,RecQ_Zn_bind
LEUER_T0000586	wrn	8479.XP_008171801.1	0.0	1265.0	COG0514@1|root,KOG4373@1|root,KOG0351@2759|Eukaryota,KOG4373@2759|Eukaryota,39TH4@33154|Opisthokonta,3BHTD@33208|Metazoa,3CWXS@33213|Bilateria,480K2@7711|Chordata,48VID@7742|Vertebrata,4CGP2@8459|Testudines	33208|Metazoa	A	Werner syndrome	WRN	GO:0000018,GO:0000217,GO:0000287,GO:0000400,GO:0000403,GO:0000405,GO:0000723,GO:0000724,GO:0000725,GO:0000731,GO:0000781,GO:0001302,GO:0001325,GO:0003674,GO:0003676,GO:0003677,GO:0003678,GO:0003682,GO:0003684,GO:0003824,GO:0004003,GO:0004386,GO:0004518,GO:0004527,GO:0005488,GO:0005515,GO:0005575,GO:0005622,GO:0005623,GO:0005634,GO:0005654,GO:0005657,GO:0005694,GO:0005730,GO:0005737,GO:0005813,GO:…	3.6.4.12	ko:K10900	-	-	-	-	ko00000,ko01000,ko03032,ko03400	-	-	-	DEAD,DNA_pol_A_exo1,HRDC,HTH_40,Helicase_C,RQC,RecQ_Zn_bind
LEUER_T0000583	wrn	8479.XP_008171801.1	0.0	1276.0	COG0514@1|root,KOG4373@1|root,KOG0351@2759|Eukaryota,KOG4373@2759|Eukaryota,39TH4@33154|Opisthokonta,3BHTD@33208|Metazoa,3CWXS@33213|Bilateria,480K2@7711|Chordata,48VID@7742|Vertebrata,4CGP2@8459|Testudines	33208|Metazoa	A	Werner syndrome	WRN	GO:0000018,GO:0000217,GO:0000287,GO:0000400,GO:0000403,GO:0000405,GO:0000723,GO:0000724,GO:0000725,GO:0000731,GO:0000781,GO:0001302,GO:0001325,GO:0003674,GO:0003676,GO:0003677,GO:0003678,GO:0003682,GO:0003684,GO:0003824,GO:0004003,GO:0004386,GO:0004518,GO:0004527,GO:0005488,GO:0005515,GO:0005575,GO:0005622,GO:0005623,GO:0005634,GO:0005654,GO:0005657,GO:0005694,GO:0005730,GO:0005737,GO:0005813,GO:…	3.6.4.12	ko:K10900	-	-	-	-	ko00000,ko01000,ko03032,ko03400	-	-	-	DEAD,DNA_pol_A_exo1,HRDC,HTH_40,Helicase_C,RQC,RecQ_Zn_bind
LEUER_T0000588	LOC116973747	8479.XP_005315677.1	9.52e-105	318.0	KOG3074@1|root,KOG3074@2759|Eukaryota,38H9E@33154|Opisthokonta,3BKV7@33208|Metazoa,3CXZD@33213|Bilateria,487TF@7711|Chordata,498QS@7742|Vertebrata	33208|Metazoa	K	Transcriptional activator protein	PURB	GO:0000122,GO:0000228,GO:0000900,GO:0000976,GO:0000977,GO:0000981,GO:0001012,GO:0001067,GO:0001227,GO:0002682,GO:0003674,GO:0003676,GO:0003677,GO:0003690,GO:0003691,GO:0003697,GO:0003700,GO:0003723,GO:0003729,GO:0005488,GO:0005515,GO:0005575,GO:0005622,GO:0005623,GO:0005634,GO:0005657,GO:0005662,GO:0005694,GO:0006139,GO:0006259,GO:0006260,GO:0006261,GO:0006268,GO:0006355,GO:0006357,GO:0006417,GO:…	-	ko:K21772,ko:K21799	-	-	-	-	ko00000,ko03019,ko03032	-	-	-	PurA
LEUER_T0000589	LOC116973747	8479.XP_005315677.1	9.52e-105	318.0	KOG3074@1|root,KOG3074@2759|Eukaryota,38H9E@33154|Opisthokonta,3BKV7@33208|Metazoa,3CXZD@33213|Bilateria,487TF@7711|Chordata,498QS@7742|Vertebrata	33208|Metazoa	K	Transcriptional activator protein	PURB	GO:0000122,GO:0000228,GO:0000900,GO:0000976,GO:0000977,GO:0000981,GO:0001012,GO:0001067,GO:0001227,GO:0002682,GO:0003674,GO:0003676,GO:0003677,GO:0003690,GO:0003691,GO:0003697,GO:0003700,GO:0003723,GO:0003729,GO:0005488,GO:0005515,GO:0005575,GO:0005622,GO:0005623,GO:0005634,GO:0005657,GO:0005662,GO:0005694,GO:0006139,GO:0006259,GO:0006260,GO:0006261,GO:0006268,GO:0006355,GO:0006357,GO:0006417,GO:…	-	ko:K21772,ko:K21799	-	-	-	-	ko00000,ko03019,ko03032	-	-	-	PurA
LEUER_T0000590	LOC116973747	8479.XP_005315677.1	9.52e-105	318.0	KOG3074@1|root,KOG3074@2759|Eukaryota,38H9E@33154|Opisthokonta,3BKV7@33208|Metazoa,3CXZD@33213|Bilateria,487TF@7711|Chordata,498QS@7742|Vertebrata	33208|Metazoa	K	Transcriptional activator protein	PURB	GO:0000122,GO:0000228,GO:0000900,GO:0000976,GO:0000977,GO:0000981,GO:0001012,GO:0001067,GO:0001227,GO:0002682,GO:0003674,GO:0003676,GO:0003677,GO:0003690,GO:0003691,GO:0003697,GO:0003700,GO:0003723,GO:0003729,GO:0005488,GO:0005515,GO:0005575,GO:0005622,GO:0005623,GO:0005634,GO:0005657,GO:0005662,GO:0005694,GO:0006139,GO:0006259,GO:0006260,GO:0006261,GO:0006268,GO:0006355,GO:0006357,GO:0006417,GO:…	-	ko:K21772,ko:K21799	-	-	-	-	ko00000,ko03019,ko03032	-	-	-	PurA
LEUER_T0000591	ppp2cb	9818.XP_007940880.1	1.7e-235	646.0	COG0639@1|root,KOG0371@2759|Eukaryota,38CQT@33154|Opisthokonta,3B9S0@33208|Metazoa,3CTRV@33213|Bilateria,481D0@7711|Chordata,490E2@7742|Vertebrata,3J6VB@40674|Mammalia,34ZEW@311790|Afrotheria	33208|Metazoa	T	Serine threonine-protein phosphatase 2A catalytic subunit beta isoform	PPP2CB	GO:0000003,GO:0000159,GO:0000212,GO:0000226,GO:0000278,GO:0000280,GO:0000302,GO:0001654,GO:0001745,GO:0001751,GO:0001752,GO:0001754,GO:0001932,GO:0001933,GO:0003002,GO:0003006,GO:0003674,GO:0003824,GO:0004721,GO:0004722,GO:0005488,GO:0005515,GO:0005575,GO:0005622,GO:0005623,GO:0005634,GO:0005737,GO:0005813,GO:0005814,GO:0005815,GO:0005829,GO:0005856,GO:0006464,GO:0006470,GO:0006508,GO:0006511,GO:…	3.1.3.16	ko:K04382,ko:K22074	ko03015,ko04013,ko04071,ko04111,ko04113,ko04114,ko04136,ko04138,ko04140,ko04151,ko04152,ko04261,ko04350,ko04390,ko04391,ko04530,ko04728,ko04730,ko05142,ko05160,ko05165,map03015,map04013,map04071,map04111,map04113,map04114,map04136,map04138,map04140,map04151,map04152,map04261,map04350,map04390,map04391,map04530,map04728,map04730,map05142,map05160,map05165	-	-	-	ko00000,ko00001,ko01000,ko01009,ko03029,ko03036,ko04147	-	-	-	Metallophos
LEUER_T0000593	LOC116973798	10029.XP_007611217.1	1.73e-100	293.0	COG5201@1|root,KOG1724@2759|Eukaryota,3A0BT@33154|Opisthokonta,3B94V@33208|Metazoa,3D10A@33213|Bilateria,480GB@7711|Chordata,48VVM@7742|Vertebrata,3JE9J@40674|Mammalia,35CW5@314146|Euarchontoglires,4Q0D6@9989|Rodentia	33208|Metazoa	O	S-phase kinase-associated protein	SKP1	GO:0000003,GO:0000086,GO:0000132,GO:0000151,GO:0000165,GO:0000209,GO:0000226,GO:0000278,GO:0001932,GO:0001933,GO:0002376,GO:0003006,GO:0003674,GO:0003824,GO:0004842,GO:0005488,GO:0005515,GO:0005575,GO:0005622,GO:0005623,GO:0005634,GO:0005654,GO:0005737,GO:0005813,GO:0005815,GO:0005829,GO:0005856,GO:0006139,GO:0006259,GO:0006260,GO:0006261,GO:0006323,GO:0006325,GO:0006464,GO:0006468,GO:0006508,GO:…	-	ko:K03094	ko04110,ko04111,ko04114,ko04120,ko04141,ko04310,ko04341,ko04350,ko04710,ko05168,ko05200,map04110,map04111,map04114,map04120,map04141,map04310,map04341,map04350,map04710,map05168,map05200	M00379,M00380,M00381,M00382,M00387,M00407,M00411	-	-	ko00000,ko00001,ko00002,ko03036,ko04121	-	-	-	Skp1,Skp1_POZ
LEUER_T0000594	LOC116973798	10029.XP_007611217.1	1.73e-100	293.0	COG5201@1|root,KOG1724@2759|Eukaryota,3A0BT@33154|Opisthokonta,3B94V@33208|Metazoa,3D10A@33213|Bilateria,480GB@7711|Chordata,48VVM@7742|Vertebrata,3JE9J@40674|Mammalia,35CW5@314146|Euarchontoglires,4Q0D6@9989|Rodentia	33208|Metazoa	O	S-phase kinase-associated protein	SKP1	GO:0000003,GO:0000086,GO:0000132,GO:0000151,GO:0000165,GO:0000209,GO:0000226,GO:0000278,GO:0001932,GO:0001933,GO:0002376,GO:0003006,GO:0003674,GO:0003824,GO:0004842,GO:0005488,GO:0005515,GO:0005575,GO:0005622,GO:0005623,GO:0005634,GO:0005654,GO:0005737,GO:0005813,GO:0005815,GO:0005829,GO:0005856,GO:0006139,GO:0006259,GO:0006260,GO:0006261,GO:0006323,GO:0006325,GO:0006464,GO:0006468,GO:0006508,GO:…	-	ko:K03094	ko04110,ko04111,ko04114,ko04120,ko04141,ko04310,ko04341,ko04350,ko04710,ko05168,ko05200,map04110,map04111,map04114,map04120,map04141,map04310,map04341,map04350,map04710,map05168,map05200	M00379,M00380,M00381,M00382,M00387,M00407,M00411	-	-	ko00000,ko00001,ko00002,ko03036,ko04121	-	-	-	Skp1,Skp1_POZ
LEUER_T0000595	rpl34	61853.ENSNLEP00000015694	1.19e-75	232.0	COG2174@1|root,KOG1790@2759|Eukaryota,3A4A9@33154|Opisthokonta,3BSMR@33208|Metazoa,3D74P@33213|Bilateria,48EMQ@7711|Chordata,49BG1@7742|Vertebrata,3JH4W@40674|Mammalia,35QA3@314146|Euarchontoglires,4MJKU@9443|Primates	33208|Metazoa	J	ribosomal protein	RPL34	GO:0002181,GO:0003674,GO:0003676,GO:0003723,GO:0003735,GO:0005198,GO:0005488,GO:0005515,GO:0005575,GO:0005622,GO:0005623,GO:0005737,GO:0005829,GO:0005840,GO:0006412,GO:0006518,GO:0006807,GO:0008092,GO:0008150,GO:0008152,GO:0009058,GO:0009059,GO:0009987,GO:0010467,GO:0015934,GO:0017022,GO:0019538,GO:0022613,GO:0022625,GO:0022626,GO:0032991,GO:0034641,GO:0034645,GO:0042254,GO:0043043,GO:0043170,GO:…	-	ko:K02915	ko03010,map03010	M00177,M00179	-	-	br01610,ko00000,ko00001,ko00002,ko03011	-	-	-	Ribosomal_L34e
LEUER_T0000596	rpl34	8364.ENSXETP00000045595	6.52e-73	220.0	COG2174@1|root,KOG1790@2759|Eukaryota,3A4A9@33154|Opisthokonta,3BSMR@33208|Metazoa,3D74P@33213|Bilateria,48EMQ@7711|Chordata,49BG1@7742|Vertebrata	33208|Metazoa	J	ribosomal protein	RPL34	GO:0000184,GO:0000956,GO:0002181,GO:0003674,GO:0003676,GO:0003723,GO:0003735,GO:0005198,GO:0005488,GO:0005515,GO:0005575,GO:0005622,GO:0005623,GO:0005737,GO:0005829,GO:0005840,GO:0006139,GO:0006401,GO:0006402,GO:0006412,GO:0006413,GO:0006518,GO:0006605,GO:0006612,GO:0006613,GO:0006614,GO:0006725,GO:0006807,GO:0006810,GO:0006886,GO:0008092,GO:0008104,GO:0008150,GO:0008152,GO:0009056,GO:0009057,GO:…	-	ko:K02915	ko03010,map03010	M00177,M00179	-	-	br01610,ko00000,ko00001,ko00002,ko03011	-	-	-	Ribosomal_L34e
LEUER_T0000597	lef1	8479.XP_005287960.1	3.02e-169	486.0	KOG3248@1|root,KOG3248@2759|Eukaryota,38F5B@33154|Opisthokonta,3BB2R@33208|Metazoa,3D3D9@33213|Bilateria,4813K@7711|Chordata,48WU3@7742|Vertebrata,4CCGG@8459|Testudines	33208|Metazoa	K	Lymphoid enhancer-binding factor 1	LEF1	GO:0000003,GO:0000122,GO:0000902,GO:0000904,GO:0000976,GO:0000977,GO:0000978,GO:0000981,GO:0000982,GO:0000987,GO:0001012,GO:0001067,GO:0001077,GO:0001228,GO:0001503,GO:0001525,GO:0001558,GO:0001568,GO:0001569,GO:0001649,GO:0001655,GO:0001667,GO:0001701,GO:0001704,GO:0001707,GO:0001755,GO:0001756,GO:0001763,GO:0001775,GO:0001817,GO:0001818,GO:0001822,GO:0001837,GO:0001890,GO:0001892,GO:0001944,GO:…	-	ko:K04492	ko04310,ko04390,ko04520,ko04916,ko04934,ko05200,ko05210,ko05213,ko05215,ko05216,ko05217,ko05221,ko05224,ko05225,ko05226,ko05412,map04310,map04390,map04520,map04916,map04934,map05200,map05210,map05213,map05215,map05216,map05217,map05221,map05224,map05225,map05226,map05412	M00677	-	-	ko00000,ko00001,ko00002,ko03000	-	-	-	CTNNB1_binding,HMG_box
LEUER_T0000598	lef1	9818.XP_007938954.1	1.13e-161	468.0	KOG3248@1|root,KOG3248@2759|Eukaryota,38F5B@33154|Opisthokonta,3BB2R@33208|Metazoa,3D3D9@33213|Bilateria,4813K@7711|Chordata,48WU3@7742|Vertebrata,3J49D@40674|Mammalia,355W6@311790|Afrotheria	33208|Metazoa	K	Lymphoid enhancer-binding factor 1	LEF1	GO:0000003,GO:0000122,GO:0000902,GO:0000904,GO:0000976,GO:0000977,GO:0000978,GO:0000981,GO:0000982,GO:0000987,GO:0001012,GO:0001067,GO:0001077,GO:0001228,GO:0001503,GO:0001525,GO:0001558,GO:0001568,GO:0001569,GO:0001649,GO:0001655,GO:0001667,GO:0001701,GO:0001704,GO:0001707,GO:0001755,GO:0001756,GO:0001763,GO:0001775,GO:0001817,GO:0001818,GO:0001822,GO:0001837,GO:0001890,GO:0001892,GO:0001944,GO:…	-	ko:K04492	ko04310,ko04390,ko04520,ko04916,ko04934,ko05200,ko05210,ko05213,ko05215,ko05216,ko05217,ko05221,ko05224,ko05225,ko05226,ko05412,map04310,map04390,map04520,map04916,map04934,map05200,map05210,map05213,map05215,map05216,map05217,map05221,map05224,map05225,map05226,map05412	M00677	-	-	ko00000,ko00001,ko00002,ko03000	-	-	-	CTNNB1_binding,HMG_box
[truncated: 32,363 more rows]

## Sheet: Mouse
query	Gene	seed_ortholog	evalue	score	eggNOG_OGs	max_annot_lvl	COG_category	Description	Preferred_name	GOs	EC	KEGG_ko	KEGG_Pathway	KEGG_Module	KEGG_Reaction	KEGG_rclass	BRITE	KEGG_TC	CAZy	BiGG_Reaction	PFAMs
[truncated: 61,950 more rows]

## Sheet: Chicken
query	Gene	seed_ortholog	evalue	score	eggNOG_OGs	max_annot_lvl	COG_category	Description	Preferred_name	GOs	EC	KEGG_ko	KEGG_Pathway	KEGG_Module	KEGG_Reaction	KEGG_rclass	BRITE	KEGG_TC	CAZy	BiGG_Reaction	PFAMs
[truncated: 27,726 more rows]
