# Supplementary material for: Little skate genome provides insights into genetic programs essential for limb-based locomotion
Source: eLife. 2022 Oct 26;11:e78345. doi: 10.7554/eLife.78345 (PMC9605692; doi:10.7554/eLife.78345)
Supplement: Supplementary file 6. — The list of additional paralog genes which are species-specific. [file elife-78345-supp6.xlsx]

## Sheet: Skate-specific
Gene	eggNOG_OGs	Average expression
LOC116988012	28H96@1	0.940114
LOC116984554	28INT@1	0.749117
edil3	28MRG@1	0.926868
tmem187	28N6V@1	0.750023
LOC116987146	29BAW@1	0.889036
LOC116978210	29Q07@1	0.949944
LOC116990375	2BCC6@1	0.756507
LOC116991068	2CFVJ@1	0.781349
LOC116977772	2CI04@1	0.763176
LOC116980481	2CNH0@1	0.731479
LOC116990375	2CY4C@1	0.756507
LOC116972792	COG2128@1	0.876766

## Sheet: Mouse-specific
Gene	eggNOG_OGs	Average expression
1810030O07Rik	28IV1@1	0.840485
Map11	28JXA@1	0.806609
2700081O15Rik	28M1A@1	0.713791
Sft2d3	28NJR@1	0.805971
Shisa7	28NPD@1	0.933263
Rbbp9	28P25@1	0.897383
Spag7	28PDV@1	0.893348
Pmvk	28S0B@1	0.923932
Tceal8	28UBN@1	0.950156
Tceal1	28ZMP@1	0.812947
Tceal9	28ZMP@1	0.93666
Fam189b	294A9@1	0.810409
Gps2	298IM@1	0.74362
Cadm4	298J5@1	0.828668
9330159F19Rik	29C5V@1	0.972006
Tceal5	29DTN@1	0.869806
Eid1	29HC7@1	0.998399
Eid2	29HC7@1	0.90307
Mrgpre	29KM8@1	0.719843
Mrfap1	29KSX@1	0.943792
Ly6h	29NCK@1	0.805047
Bex1	29NSV@1	0.975286
Bex2	29NSV@1	0.996942
Bex3	29NSV@1	0.99443
Cd55	29VU7@1	0.830997
Rtl9	29VU7@1	0.712151
Cplx2	2A01J@1	0.841825
Irgq	2A4ZG@1	0.958797
Haus7	2AEDW@1	0.837674
Ccdc136	2AUMU@1	0.793933
Btbd8	2B9CZ@1	0.862791
1700123O20Rik	2BE44@1	0.833483
Atraid	2BSJ1@1	0.743268
Ldoc1	2BVKA@1	0.815276
Rtl8a	2BVKA@1	0.822239
Rtl8b	2BVKA@1	0.883093
Rtl8c	2BVKA@1	0.953917
1110032F04Rik	2BWQS@1	0.726272
Tmem29	2BXXE@1	0.749489
Ccdc184	2BYS4@1	0.72402
Hcfc1r1	2C1GB@1	0.962181
Ttc5	2C216@1	0.746275
Cgref1	2C3K5@1	0.888676
Ackr1	2C3NR@1	0.876898
Nnat	2C43K@1	0.998542
Arl6ip6	2C4BB@1	0.788779
Palm3	2C4NP@1	0.854358
Tcaf1	2C8EZ@1	0.986791
Elp5	2C8W2@1	0.924348
Ccdc115	2CARM@1	0.861568
BC031181	2CB16@1	0.948151
AI837181	2CBU5@1	0.746834
Fibp	2CBWY@1	0.713999
Tusc1	2CEI4@1	0.843816
Crebzf	2CF6G@1	0.879332
Arhgap32	2CFP2@1	0.768008
Lynx1	2CGRU@1	0.806179
Akap5	2CHIA@1	0.885058
Ier3	2CI0M@1	0.707583
Selenoh	2CI2V@1	0.947579
Pcsk1n	2CM6I@1	0.811723
Gal3st3	2CM97@1	0.809849
Armcx2	2CMDV@1	0.927914
Armcx1	2CNZM@1	0.972852
Rnf227	2CP6Y@1	0.92997
Prr36	2CSWZ@1	0.848098
Mrpl52	2CW4K@1	0.941384
Peg10	2CYBY@1	0.95009
Morn2	2CYM3@1	0.751519
Dmac1	2CZC0@1	0.936556
Zmym5	2CZDI@1	0.872812
Tmem126b	2D36V@1	0.851521
Ptov1	2D3MU@1	0.87941
Inafm1	2D5JA@1	0.831544
Ptma	2D5VE@1	0.987545
Rtl4	2D7QB@1	0.760668
Ngrn	2D7ZY@1	0.778706
Gm42372	2D9G7@1	0.8298
Pnmal1	2D9G7@1	0.702117
Atxn7l3b	2D9SA@1	0.983836
Vgf	2DDHF@1	0.760812
Emd	2DFM0@1	0.860266
S100pbp	2DII3@1	0.799464
Zwint	2DW2B@1	0.977134
Trnp1	2DZTV@1	0.797382
Cystm1	2DZUA@1	0.707076
Smim10l1	2DZV3@1	0.98299
Aldoa	2E0B1@1	0.981481
Macrod2	2E1PY@1	0.798462
Mtln	2E21Z@1	0.903057
Resf1	2E27G@1	0.800895
Uqcc3	2E2NM@1	0.787543
Selenow	2E2P9@1	0.978813
Cd59a	2E2YV@1	0.944325
Cox8a	2E30I@1	0.996239
Dleu7	2E34V@1	0.705371
Mxra7	2E3A5@1	0.758352
Fam216a	2E561@1	0.818126
Sprn	2E5M6@1	0.80247
2410002F23Rik	2E79Y@1	0.736423
Fv1	2E79Y@1	0.812153
D030056L22Rik	2E7XB@1	0.926066
Tmem176b	2E8TQ@1	0.868244
Tunar	2E9CE@1	0.745936
Ndufc1	2E9FE@1	0.963547
Fxyd7	2E9NK@1	0.983641
Zbed3	2EK5F@1	0.755996
Flywch1	2EM1J@1	0.715756
Ptms	2EPT5@1	0.892099
Coprs	2EQ4X@1	0.708703
Ccl27a	2ETH7@1	0.732532
Gm20604	2ETVW@1	0.843074
Gon7	2ETVW@1	0.824711
1500011B03Rik	2EVC9@1	0.905178
Ccl27a	2EY96@1	0.732532
Smim26	2EYSR@1	0.943883
1810037I17Rik	2EZ33@1	0.768919
Zc3hav1l	2EZT9@1	0.717943
Zfp428	2F2EM@1	0.748812
Gm38393	2F4G4@1	0.993792
Prr3	2F9HT@1	0.730449
Tor1aip2	2F9YV@1	0.8162
6330403K07Rik	2FCFT@1	0.998568
Bex4	2FCJX@1	0.894884
Igip	2FCMQ@1	0.833626
Clstn3	2FFI8@1	0.805971
B230217C12Rik	2FFMM@1	0.822603
1500011B03Rik	2FHAU@1	0.905178
Mrpl36	COG0257@1	0.909226
Aldh18a1	COG0263@1	0.75977
G6pdx	COG0364@1	0.849985
Prdx5	COG0678@1	0.849347
Dctpp1	COG1694@1	0.715978
Fbll1	COG1889@1	0.780216
Ndufv1	COG1894@1	0.873593
Rpp21	COG2023@1	0.759992
Nop10	COG2260@1	0.937935
Tmem256	COG2363@1	0.875922
Gins4	COG5086@1	0.747472
Supt16	COG5406@1	0.902745
Tmx2	KOG0914@1	0.877627
Itsn1	KOG1029@1	0.789404
Itsn2	KOG1029@1	0.795911
Eif3c	KOG1076@1	0.977798
Wdr46	KOG1272@1	0.756634
Wdfy3	KOG1788@1	0.925181
Acin1	KOG2416@1	0.7023
Ngdn	KOG3117@1	0.756673
Rabac1	KOG3142@1	0.915759
Psmd8	KOG3151@1	0.939497
Ccdc124	KOG3223@1	0.747186
Tmem147	KOG3236@1	0.941527
Vps28	KOG3284@1	0.959044
Emc4	KOG3318@1	0.944559
Ufc1	KOG3357@1	0.89314
Znhit1	KOG3362@1	0.724541
Trappc1	KOG3368@1	0.966046
Pqbp1	KOG3427@1	0.894012
Gpaa1	KOG3566@1	0.70718
Ssr4	KOG4088@1	0.703718
Ppp1r11	KOG4102@1	0.840849
Bscl2	KOG4200@1	0.708833
Gpkow	KOG4315@1	0.818321
Ankhd1	KOG4369@1	0.856544
2310061I04Rik	KOG4457@1	0.821015
Serf1	KOG4488@1	0.9652
Elob	KOG4495@1	0.960775
Mdp1	KOG4549@1	0.85782
Cisd3	KOG4605@1	0.708078
Krtcap2	KOG4615@1	0.792801
Ndufb11	KOG4808@1	0.947488

## Sheet: Chick-specific
Gene	eggNOG_OGs	Average expression
SELENOW	29MTE@1	0.912541
TNFRSF9	2AXKB@1	0.703556
PXDC1	2C3NV@1	0.756567
CDCA9	2C8HV@1	0.74022
MGARP	2DZFP@1	0.732587
SUB1	KOG2712@1	0.989237
