# Supplementary material for: Little skate genome provides insights into genetic programs essential for limb-based locomotion
Source: eLife. 2022 Oct 26;11:e78345. doi: 10.7554/eLife.78345 (PMC9605692; doi:10.7554/eLife.78345)
Supplement: Supplementary file 7. — The list of species-specific genes which do not share the same ortholog groups with common genes. [file elife-78345-supp7.xlsx]

## Sheet: Skate
SkateSpecific genes	OG
anxa1	KOG0819@1
arsb	COG3119@1
btbd17	2CMKF@1
c23h20orf85	2CEVI@1
ca9	COG3338@1
cald1	2CMZM@1
cd74	COG2272@1
colq	KOG3544@1
gamt	KOG1709@1
rprml	2BVDZ@1
acy1	COG0624@1
c41h19orf47	KOG3930@1
paox	KOG0685@1
etv5	KOG3806@1
eya1	KOG3107@1
fbxl15	KOG1947@1
ggact	COG2105@1
gmppb	COG1208@1
LOC116983281	KOG4012@1
hgd	COG3508@1
ism1	2BVTS@1
LOC116985895	2CY6X@1
mdfic2	2E41X@1
nid1	COG2272@1
ntn1	KOG3512@1
pou3f4	KOG3802@1
LOC116988000	KOG0083@1
rfx5	KOG3712@1
rgcc	2BQHC@1
LOC116977512	KOG3589@1
scrg1	2DTQP@1
traf2	KOG0297@1
usp2	KOG1868@1
wdr54	28JFT@1
zfp36l2	COG5063@1
LOC116973613	28MMD@1

## Sheet: Mouse
MouseSpecific genes	OG
4833420G17Rik	2C29Q@1
Cers2	COG5058@1
Clmp	KOG3866@1
Cthrc1	28K4T@1
Ctxn1	2CI42@1
Deaf1	KOG4333@1
Etv4	KOG3806@1
Kctd12	KOG2723@1
Mal2	KOG4788@1
Mecp2	KOG4161@1
Med11	KOG4057@1
Minar2	2CEHK@1
Nab1	KOG3835@1
Ppp1r1c	2C6F5@1
Rbp1	KOG4015@1
Rfx6	KOG3712@1
Rprm	2BVDZ@1
Sfr1	2BP39@1
Slc18a2	KOG3764@1
Socs2	KOG4566@1
Sra1	2AHUJ@1

## Sheet: Chick
ChickSpecific genes	OG
CDCA7L	28ICU@1
MSH4	COG0249@1
STAT1	KOG3667@1
